# Supplementary material for: Repeated and Widespread Evolution of Bioluminescence in Marine Fishes
Source: PubMed Central journal article supplement (PMC4898709; doi:10.1371/journal.pone.0155154), 2016-06-08

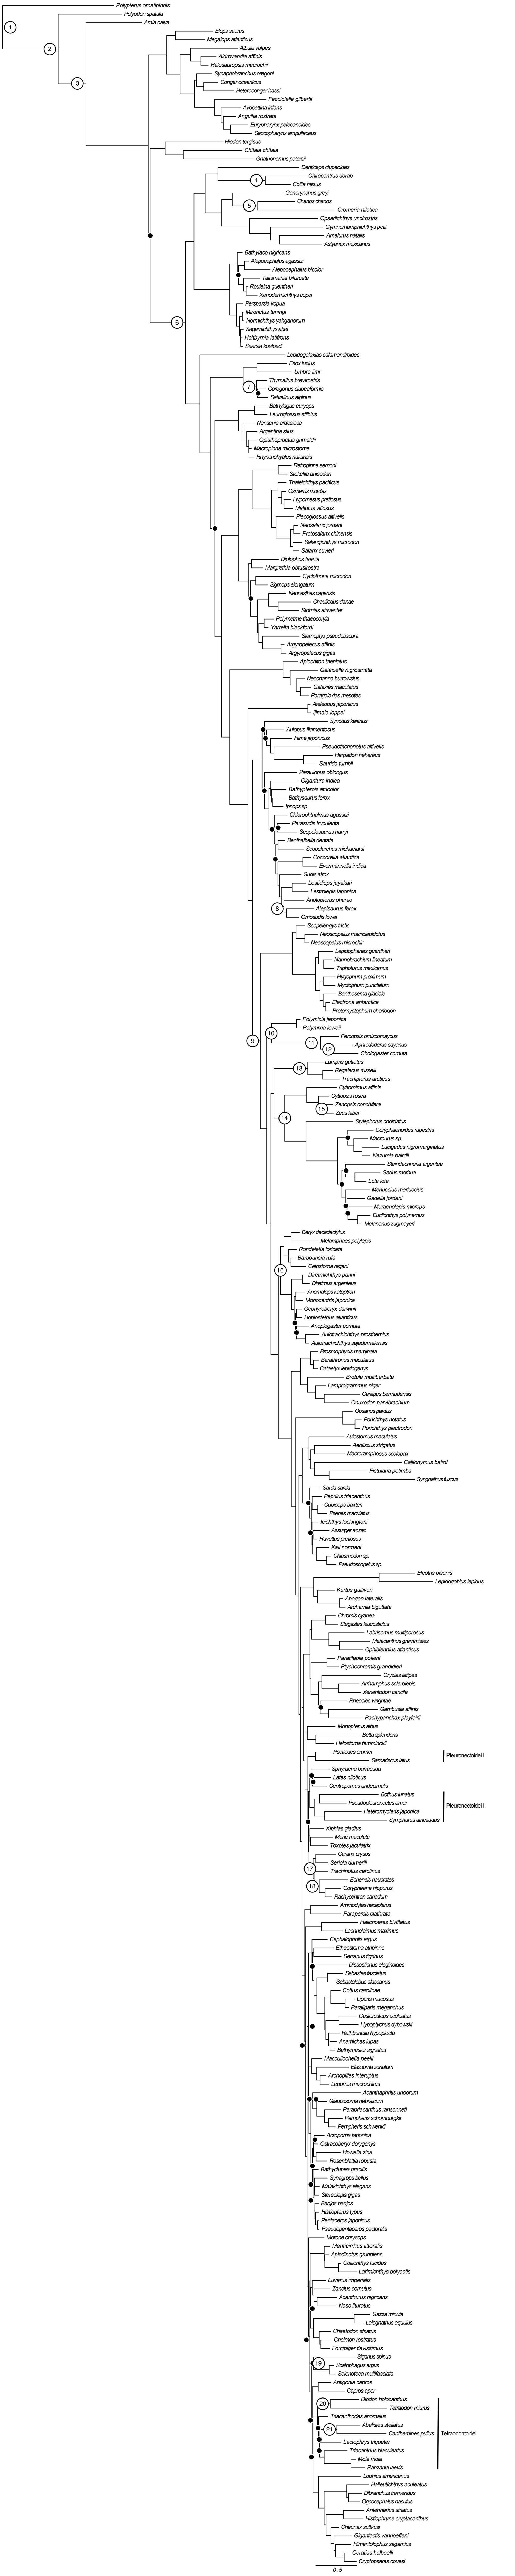

Supplement: pone.0155154.s001.pdf [file pone.0155154.s001.pdf]
