# Supplementary material for: Repeated and Widespread Evolution of Bioluminescence in Marine Fishes
Source: PubMed Central journal article supplement (PMC4898709; doi:10.1371/journal.pone.0155154), 2016-06-08
Supplement: pone.0155154.s002.pdf [file pone.0155154.s002.pdf]

Supplement Table 1: Genbank accession numbers for newly collected sequences

|                                   | COI      | ENC1     | GLYT     | MYH6     | PLAG     | PTR      | RAG1     | SH3      | SREB     | TBR      | ZIC1     |
|-----------------------------------|----------|----------|----------|----------|----------|----------|----------|----------|----------|----------|----------|
| <i>Alepocephalus bicolor</i>      | KJ190022 | KX227793 | KX227812 | NA       | KX227893 | NA       | NA       | KX227950 | NA       | KX227989 | KJ190108 |
| <i>Argyropelecus affinis</i>      | KJ190035 | KX227794 | NA       | KX227850 | KX227894 | KX227913 | KX228066 | KX227951 | NA       | KX227990 | KJ190121 |
| <i>Aulopus filamentosus</i>       | EU366546 | EU366593 | KX227813 | KX227851 | EU366642 | NA       | EU366688 | NA       | NA       | NA       | EU366733 |
| <i>Avocettina infans</i>          | KX228016 | NA       | KX227814 | KX227852 | KX227895 | KX227914 | NA       | KX227952 | NA       | KX227991 | NA       |
| <i>Bathyclupea gracilis</i>       | NA       | NA       | KX227815 | KX227853 | NA       | KX227915 | NA       | KX227953 | KX227980 | KX227992 | KX228050 |
| <i>Bathysaurus ferox</i>          | EU366547 | EU366594 | KX227816 | KX227854 | EU366643 | KX227916 | EU366689 | NA       | NA       | NA       | EU366734 |
| <i>Benthoosema glaciale</i>       | KF768167 | NA       | KX227817 | NA       | NA       | KX227917 | KF768155 | KX227954 | NA       | KX227993 | KF768160 |
| <i>Chauliodus danae</i>           | KX228017 | KX227795 | KX227818 | KX227855 | NA       | KX227918 | NA       | KX227955 | NA       | KX227994 | KX228049 |
| <i>Coccorella atlantica</i>       | EU366554 | EU366601 | KX227819 | KX227856 | EU366649 | KX227919 | EU366696 | NA       | NA       | NA       | EU366741 |
| <i>Diplophos taenia</i>           | KJ190028 | KX227796 | KX227820 | KX227857 | KX227896 | KX227920 | KJ190079 | KX227956 | KX227981 | NA       | KJ190114 |
| <i>Evermannella indica</i>        | EU366555 | EU366602 | KX227821 | KX227858 | EU366650 | NA       | EU366697 | NA       | NA       | NA       | EU366742 |
| <i>Facciolella gilbertii</i>      | KF768170 | KX227797 | NA       | KX227859 | KX227897 | KX227921 | NA       | KX227957 | KX227982 | KX227995 | KF768162 |
| <i>Gadella jordani</i>            | KX228018 | KX227798 | KX227822 | KX227860 | KX227898 | NA       | NA       | KX227958 | NA       | NA       | NA       |
| <i>Gigantura indica</i>           | EU366557 | EU366604 | KX227823 | KX227861 | EU366652 | KX227922 | EU366699 | NA       | NA       | NA       | EU366744 |
| <i>Harpadon nehereus</i>          | EU366558 | EU366605 | KX227824 | KX227862 | EU366653 | KX227923 | EU366700 | NA       | NA       | NA       | EU366745 |
| <i>Hime japonicus</i>             | EU366545 | EU366592 | KX227825 | KX227863 | EU366641 | KX227924 | EU366687 | NA       | NA       | NA       | EU366732 |
| <i>Holtbyrnia latifrons</i>       | KJ190023 | NA       | KX227826 | KX227864 | KX227899 | KX227925 | NA       | KX227959 | NA       | KX227996 | KJ190109 |
| <i>Ipnops sp</i>                  | EU366560 | EU366607 | KX227827 | KX227865 | EU366655 | KX227926 | EU366702 | NA       | NA       | NA       | EU366747 |
| <i>Lepidophanes guentheri</i>     | KJ190062 | NA       | NA       | NA       | KX227900 | KX227927 | KJ190094 | KX227960 | NA       | NA       | KJ190147 |
| <i>Leuroglossus stilbuis</i>      | KX228019 | KX227799 | KX227828 | KX227866 | KX227901 | KX227928 | KX228065 | KX227961 | NA       | KX227997 | KX228048 |
| <i>Lucigadus nigromarginatus</i>  | NA       | KX227800 | KX227829 | KX227867 | NA       | KX227929 | KX228064 | KX227962 | NA       | KX227998 | KX228047 |
| <i>Margrethia obtusirostra</i>    | KJ190029 | KX227801 | NA       | KX227868 | NA       | KX227930 | KJ190080 | KX227963 | NA       | KX227999 | NA       |
| <i>Mirorictus taningi</i>         | KX228020 | NA       | KX227830 | KX227869 | KX227902 | NA       | KX228063 | NA       | NA       | NA       | KX228046 |
| <i>Myctophum punctatum</i>        | KJ190065 | NA       | KX227831 | KX227870 | KX227903 | KX227931 | KX228062 | KX227964 | NA       | KX228000 | NA       |
| <i>Nannobranchium lineatum</i>    | KX228021 | NA       | KX227832 | NA       | NA       | KX227932 | KX228061 | KX227965 | NA       | NA       | KX228045 |
| <i>Neoscopelus macrolepidotus</i> | EU366587 | EU366632 | NA       | KX227871 | EU366678 | KX227933 | EU366727 | KX227966 | KX227983 | KX228001 | EU366771 |
| <i>Normichthys yahganorum</i>     | NA       | NA       | KX227833 | KX227872 | KX227904 | KX227934 | NA       | KX227967 | NA       | KX228002 | KX228044 |
| <i>Opisthoproctus grimaldii</i>   | NA       | KX227802 | NA       | KX227873 | NA       | NA       | KX228060 | NA       | NA       | KX228003 | KX228043 |
| <i>Parasudis truculenta</i>       | EU366569 | EU366616 | KX227834 | KX227874 | NA       | KX227935 | EU366710 | NA       | NA       | NA       | EU366753 |
| <i>Paraulopus oblongus</i>        | EU366568 | EU366615 | KX227835 | KX227875 | EU366664 | KX227936 | EU366709 | NA       | NA       | NA       | EU366752 |
| <i>Persarsia kopua</i>            | KX228022 | NA       | NA       | KX227876 | KX227905 | KX227937 | NA       | KX227968 | NA       | KX228004 | KX228042 |
| <i>Plecoglossus altivelis</i>     | KJ190025 | KX227803 | KX227836 | KX227877 | NA       | NA       | KJ190076 | KX227969 | KX227984 | KX228005 | KX228041 |
| <i>Polymetme thaeocoryla</i>      | KJ190039 | KX227804 | NA       | KX227878 | NA       | KX227938 | KX228059 | KX227970 | KX227985 | KX228006 | KX228040 |
| <i>Pseudoscopelus sp</i>          | KX228023 | KX227805 | KX227837 | KX227879 | KX227906 | KX227939 | KX228058 | KX227971 | KX227986 | KX228007 | KX228039 |
| <i>Pseudotriconotus altivelis</i> | EU366570 | EU366617 | KX227838 | KX227880 | NA       | KX227940 | EU366711 | NA       | NA       | NA       | EU366754 |
| <i>Rhynchohyalus natalensis</i>   | KX228024 | KX227806 | KX227839 | KX227881 | NA       | NA       | KX228057 | KX227972 | NA       | KX228008 | KX228038 |
| <i>Rosenblattia robusta</i>       | KX228025 | KX227807 | KX227840 | KX227882 | KX227907 | KX227941 | KX228056 | KX227973 | NA       | KX228009 | KX228037 |
| <i>Rouleina guentheri</i>         | NA       | NA       | KX227841 | KX227883 | NA       | KX227942 | NA       | KX227974 | NA       | KX228010 | KX228036 |
| <i>Saurida tumbil</i>             | KF768174 | KX227808 | KX227842 | KX227884 | NA       | KX227943 | KX228055 | NA       | NA       | NA       | KX228035 |
| <i>Scopelosaurus harryi</i>       | EU366572 | EU366619 | KX227843 | KX227885 | EU366666 | KX227944 | EU366713 | NA       | NA       | NA       | EU366756 |
| <i>Sigmops elongatum</i>          | KX228026 | KX227809 | KX227844 | KX227886 | KX227908 | NA       | NA       | NA       | NA       | NA       | KX228034 |
| <i>Sternoptyx pseudobscura</i>    | KF768176 | NA       | NA       | KX227887 | KX227909 | NA       | KX228054 | KX227975 | KX227987 | KX228011 | KX228033 |
| <i>Stomias atriventer</i>         | KF768177 | KX227810 | NA       | KX227888 | KX227910 | KX227945 | KX228053 | KX227976 | NA       | KX228012 | KF768166 |
| <i>Synaphobranchus oregoni</i>    | KX228027 | NA       | KX227845 | KX227889 | KX227911 | KX227946 | NA       | KX227977 | NA       | KX228013 | KX228032 |
| <i>Synodus kaianus</i>            | EU366578 | EU366625 | KX227846 | KX227890 | EU366672 | KX227947 | EU366719 | NA       | NA       | NA       | EU366761 |
| <i>Talismania bifurcata</i>       | KX228028 | KX227811 | KX227847 | NA       | KX227912 | NA       | KX228052 | NA       | NA       | NA       | KX228031 |
| <i>Thaleichthys pacificus</i>     | KX228029 | EU366635 | KX227848 | KX227891 | EU366681 | KX227948 | AY380537 | KX227978 | KX227988 | KX228014 | EU366774 |
| <i>Triphoturus mexicanus</i>      | KJ190074 | NA       | KX227849 | KX227892 | NA       | KX227949 | KX228051 | KX227979 | NA       | KX228015 | KX228030 |
