# Supplementary material for: Repeated and Widespread Evolution of Bioluminescence in Marine Fishes
Source: PubMed Central journal article supplement (PMC4898709; doi:10.1371/journal.pone.0155154), 2016-06-08
Supplement: pone.0155154.s003.pdf [file pone.0155154.s003.pdf]

Supplement Table 2: Genbank accession numbers for COI sequences

|                                      | COI                      |
|--------------------------------------|--------------------------|
| <i>Abalistes stellatus</i>           | JF492756                 |
| <i>Acanthochaenus luetkenii</i>      | <a href="#">EU148068</a> |
| <i>Acanthurus nigricans</i>          | EF648267                 |
| <i>Acropoma japonica</i>             | HQ945845                 |
| <i>Albula vulpes</i>                 | GU225131                 |
| <i>Aldrovandia affinis</i>           | AP002974                 |
| <i>Alepisaurus ferox</i>             | EU366542                 |
| <i>Alepocephalus agassizi</i>        | NC13564                  |
| <i>Alepocephalus bicolor</i>         | KJ190022                 |
| <i>Ameiurus natalis</i>              | EU524425                 |
| <i>Amia calva</i>                    | AB042952                 |
| <i>Ammodytes hexapterus</i>          | JQ353985                 |
| <i>Anguilla rostrata</i>             | EU524441                 |
| <i>Anomalops katopriion</i>          | FJ58285                  |
| <i>Anoplogaster cornuta</i>          | FJ164283                 |
| <i>Anopteryx pharo</i>               | GU440224                 |
| <i>Antennarius striatus</i>          | GU188497                 |
| <i>Antigonia capros</i>              | AP002943                 |
| <i>Aphredoderus sayanus</i>          | JN024806                 |
| <i>Aplochiton taeniatus</i>          | HQ540333                 |
| <i>Aplodinotus grunniens</i>         | EU523923                 |
| <i>Archoplites interruptus</i>       | JN024809                 |
| <i>Argyropelecus affinis</i>         | KJ190035                 |
| <i>Argyropelecus gigas</i>           | EU148084                 |
| <i>Assurger anzac</i>                | JN990845                 |
| <i>Astyanax mexicanus</i>            | HQ557152                 |
| <i>Ateleopus japonicus</i>           | AP002916                 |
| <i>Aulopus filamentosus</i>          | EU366546                 |
| <i>Aulostomus maculatus</i>          | JQ842017                 |
| <i>Aulotrachichthys prothemius</i>   | DQ648438                 |
| <i>Avocettina infans</i>             | KX228016                 |
| <i>Barbourisia rufa</i>              | JQ354000                 |
| <i>Bathylaco nigricans</i>           | AP009494                 |
| <i>Bathymaster signatus</i>          | HQ712316                 |
| <i>Bathysaurus ferox</i>             | EU366547                 |
| <i>Benthalbella dentata</i>          | EU366552                 |
| <i>Benthoosema glaciale</i>          | KF768167                 |
| <i>Beryx decadactylus</i>            | JF492956                 |
| <i>Betta splendens</i>               | JQ667506                 |
| <i>Bothus lunatus</i>                | JQ842025                 |
| <i>Bromophycis marginata</i>         | JQ354026                 |
| <i>Brotula multibarbata</i>          | JQ431501                 |
| <i>Callionymus bairdi</i>            | JQ840435                 |
| <i>Cantherhines pullus</i>           | JQ841489                 |
| <i>Capros aper</i>                   | JQ774992                 |
| <i>Caranx crysos</i>                 | GU702378                 |
| <i>Carapus bermudensis</i>           | JQ841493                 |
| <i>Centroberyx druzhinini</i>        | HQ945941                 |
| <i>Centropomus undecimalis</i>       | JQ365276                 |
| <i>Cephalopholis argus</i>           | JX674947                 |
| <i>Ceratas holboelli</i>             | GU440269                 |
| <i>Cetostoma regani</i>              | AP010882                 |
| <i>Chaetodon striatus</i>            | JQ840451                 |
| <i>Chanos chanos</i>                 | HQ654700                 |
| <i>Chauliodon danae</i>              | KX228017                 |
| <i>Chelmon rostratus</i>             | FJ583134                 |
| <i>Chiasmodon sp</i>                 | JQ354040                 |
| <i>Chirocentrus dorab</i>            | JF493145                 |
| <i>Chitala chitala</i>               | FJ918897                 |
| <i>Chlorophthalmus agassizi</i>      | EU366553                 |
| <i>Chologaster cornuta</i>           | HQ557553                 |
| <i>Chromis cyanea</i>                | JQ840457                 |
| <i>Coccorella atlantica</i>          | EU366554                 |
| <i>Coilia nasus</i>                  | AP009135                 |
| <i>Collichthys lucidus</i>           | HM180544                 |
| <i>Coregonus clupeaformis</i>        | EU523959                 |
| <i>Coryphaena hippurus</i>           | JQ839745                 |
| <i>Cottus caroliniae</i>             | JN025051                 |
| <i>Cromeria nilotica</i>             | AP007275                 |
| <i>Cryptosaras couesi</i>            | EU403054                 |
| <i>Cyclothone microdon</i>           | EU148134                 |
| <i>Cyttopsis rosea</i>               | JQ774524                 |
| <i>Denticeps clupeioides</i>         | AP007276                 |
| <i>Dibranchius tremendus</i>         | KC015319                 |
| <i>Diodon holocanthus</i>            | GU225199                 |
| <i>Diplophos taenia</i>              | KJ190028                 |
| <i>Dirtemus argenteus</i>            | EU148155                 |
| <i>Dissostichus eleginoides</i>      | JN640627                 |
| <i>Echeneis naucrates</i>            | JQ841117                 |
| <i>Elassoma zonatum</i>              | JN025308                 |
| <i>Electrona antarctica</i>          | EU326342                 |
| <i>Electris pisonis</i>              | AY722157                 |
| <i>Elops saurus</i>                  | AP004807                 |
| <i>Esox lucius</i>                   | EU524591                 |
| <i>Etheostoma atripinne</i>          | HQ557533                 |
| <i>Eurypharynx pelecanaoides</i>     | AB046473                 |
| <i>Evermannella indica</i>           | EU366555                 |
| <i>Facciolaella gilberti</i>         | KF768170                 |
| <i>Fistularia petimba</i>            | JQ365356                 |
| <i>Forcipiger flavissimus</i>        | JF434972                 |
| <i>Gadella jordani</i>               | KX228018                 |
| <i>Gadus morhua</i>                  | KP975727                 |
| <i>Galaxias maculatus</i>            | AP004104                 |
| <i>Galaxiella nigrostriata</i>       | AP006853                 |
| <i>Gambusia affinis</i>              | JQ842475                 |
| <i>Gasterosteus aculeatus</i>        | JQ354102                 |
| <i>Gazza minuta</i>                  | DQ028007                 |
| <i>Gephyroberyx darwinii</i>         | HQ945918                 |
| <i>Gigantactis vanhoefeni</i>        | EU148172                 |
| <i>Gigantura indica</i>              | EU366557                 |
| <i>Glaucosoma hebraicum</i>          | EF609357                 |
| <i>Gnathonemus petersii</i>          | HM880237                 |
| <i>Gonorynchus greyi</i>             | AB054134                 |
| <i>Gymnorhynchichthys petit</i>      | JN988878                 |
| <i>Gyrinomimus sp</i>                | FJ164638                 |
| <i>Halichoeres bivittatus</i>        | JQ840524                 |
| <i>Halosaurus macrochir</i>          | EU869816                 |
| <i>Harpadon neherus</i>              | EU366558                 |
| <i>Heteroconger hassi</i>            | JQ350055                 |
| <i>Heteromycteris japonica</i>       | ABFJ254                  |
| <i>Himantolophus sagamius</i>        | GU440342                 |
| <i>Hime japonicus</i>                | EU366545                 |
| <i>Hiodon tergisus</i>               | EU524659                 |
| <i>Histiophryne cryptacanthus</i>    | GU188513                 |
| <i>Histioplerus typus</i>            | HQ945817                 |
| <i>Holtbyrnia latifrons</i>          | KJ190023                 |
| <i>Hoplostethus atlanticus</i>       | JN580187                 |
| <i>Hygophum proximum</i>             | KJ555400                 |
| <i>Hypomesus pretiosus</i>           | JQ354137                 |
| <i>Hypopteryx dybowski</i>           | NC4400                   |
| <i>Ipnops sp</i>                     | EU366560                 |
| <i>Kali normani</i>                  | GU440362                 |
| <i>Kurtus gulliveri</i>              | EU381031                 |
| <i>Lachnolaimus maximus</i>          | JQ841240                 |
| <i>Lactophrys triquetra</i>          | JQ861018                 |
| <i>Lampris guttatus</i>              | DQ885096                 |
| <i>Lamprogrammus niger</i>           | JQ354156                 |
| <i>Larimichthys polyactis</i>        | HM068248                 |
| <i>Lates niloticus</i>               | GU324190                 |
| <i>Leiognathus equulus</i>           | DQ028017                 |
| <i>Lepidogalaxias salamandroides</i> | FJ918925                 |
| <i>Lepidophanes guentheri</i>        | KJ190062                 |
| <i>Lepomis macrochirus</i>           | EU524741                 |
| <i>Lestidiopsis jayakari</i>         | EU366562                 |
| <i>Lestrolepis japonica</i>          | KJ190055                 |
| <i>Leuroglossus stilibius</i>        | KX228019                 |
| <i>Liparis mucosus</i>               | JQ354182                 |
| <i>Lophius americanus</i>            | EU660715                 |
| <i>Lota lota</i>                     | HQ961084                 |
| <i>Luvarus imperialis</i>            | AP009161                 |
| <i>Maccullochella peelii</i>         | DQ107940                 |
| <i>Macropinna microstoma</i>         | EU869816                 |
| <i>Macroramphosus scolopax</i>       | JQ775070                 |
| <i>Macrourus sp</i>                  | EU074455                 |
| <i>Mallotus villosus</i>             | HQ712650                 |
| <i>Margrethia obtusirostra</i>       | KJ190029                 |
| <i>Megalops atlanticus</i>           | AP004808                 |
| <i>Melanonus zugmayeri</i>           | EU148250                 |
| <i>Mene maculata</i>                 | GU805056                 |
| <i>Merluccius merluccius</i>         | KC500913                 |
| <i>Mirorictus tanningi</i>           | KX228020                 |
| <i>Mola mola</i>                     | JX438518                 |
| <i>Monocentris japonica</i>          | DQ648452                 |
| <i>Monopterus albus</i>              | AP002945                 |
| <i>Morone chrysops</i>               | EU524141                 |
| <i>Myctophum punctatum</i>           | KJ190065                 |
| <i>Myripristis murdjan</i>           | JF493941                 |
| <i>Myripristis violacea</i>          | HM034239                 |
| <i>Nannobranchium lineatum</i>       | KX228021                 |
| <i>Nansenia ardesiaca</i>            | AP004106                 |
| <i>Naso lituratus</i>                | HM034244                 |
| <i>Neonesthes capensis</i>           | KF768171                 |
| <i>Neosalanx jordani</i>             | HM151574                 |
| <i>Neoscopelus macrolepidotus</i>    | EU366587                 |
| <i>Neoscopelus microchir</i>         | KF768172                 |
| <i>Omosudis lowei</i>                | EU366566                 |
| <i>Onuxodon parvibrachium</i>        | JF494022                 |
| <i>Ophioblennius atlanticus</i>      | FJ583755                 |
| <i>Opsariichthys uncirostris</i>     | AB218897                 |
| <i>Oryzias latipes</i>               | AP004421                 |
| <i>Osmerus mordax</i>                | JQ354253                 |
| <i>Paraperis clathrata</i>           | JQ844110                 |
| <i>Parapriacanthus ransonneti</i>    | GU805108                 |
| <i>Paratilapia polleni</i>           | AY263886                 |
| <i>Paraulopus oblongus</i>           | EU366568                 |
| <i>Pempheris schwenkii</i>           | HQ561454                 |
| <i>Percopsis omiscomaycus</i>        | EU524269                 |
| <i>Persparia kopua</i>               | KX228022                 |
| <i>Plecoglossus altivelis</i>        | KJ190025                 |
| <i>Polymetme thaeocoryla</i>         | KJ190039                 |
| <i>Polymixia japonica</i>            | AB034826                 |
| <i>Polymixia lowei</i>               | AP002927                 |
| <i>Porichthys notatus</i>            | JQ354298                 |
| <i>Poromitra crassiceps</i>          | FJ165052                 |
| <i>Protomyctophum choriodon</i>      | EU326418                 |
| <i>Protosalanx chinensis</i>         | JN242658                 |
| <i>Psettodes erumei</i>              | EF609580                 |
| <i>Pseudopentaceros pectoralis</i>   | GU440483                 |
| <i>Pseudopleuronectes americanus</i> | EU752158                 |
| <i>Pseudoscopelus sp</i>             | KX228023                 |
| <i>Pseudotrachinotus altivelis</i>   | EU366570                 |
| <i>Ptychochromis grandidieri</i>     | AY263878                 |
| <i>Rachycentron canadum</i>          | JQ841349                 |
| <i>Ranzania laevis</i>               | HQ167729                 |
| <i>Rathbunella hypoplecta</i>        | GU440493                 |
| <i>Retroinna semoni</i>              | FJ918924                 |
| <i>Rheopocles wrightae</i>           | AY290803                 |
| <i>Rhynchochelys natelnsis</i>       | KX228024                 |
| <i>Rondeletia loricata</i>           | EU148304                 |
| <i>Rosenblattia robusta</i>          | KX228025                 |
| <i>Saccopharynx ampullaceus</i>      | EU148306                 |
| <i>Sagamichthys abei</i>             | KF930364                 |
| <i>Salangichthys microdon</i>        | FJ205609                 |
| <i>Salanx cuvieri</i>                | HM151589                 |
| <i>Salvelinus alpinus</i>            | JX960951                 |
| <i>Sarda sarda</i>                   | JQ623978                 |
| <i>Sargocentron cornutum</i>         | FJ237590                 |
| <i>Sargocentron vexillarium</i>      | JQ840676                 |
| <i>Saurida tumbil</i>                | KF768174                 |
| <i>Scatophagus argus</i>             | JN021250                 |
| <i>Scopelarchus michaelarsi</i>      | KM983051                 |
| <i>Scopelogadus beanii</i>           | KF768175                 |
| <i>Scopeloberyx sp</i>               | EU148313                 |
| <i>Scopelogadus beanii</i>           | EU148316                 |
| <i>Searsia koefoedi</i>              | EU366572                 |
| <i>Sebastolobus alascanus</i>        | EU148320                 |
| <i>Selenotoca multifasciata</i>      | JQ354498                 |
| <i>Seriola dumerilii</i>             | DQ107759                 |
| <i>Seriola dumerilii</i>             | JX261426                 |
| <i>Serranus tigrinus</i>             | JQ843057                 |
| <i>Siganus spinus</i>                | JQ432159                 |
| <i>Sigmops elongatum</i>             | KX228026                 |
| <i>Sphyraena barracuda</i>           | JQ842711                 |
| <i>Stegastes leucostictus</i>        | JQ841016                 |
| <i>Stereolepis gigas</i>             | GU440534                 |
| <i>Sternopyx pseudobscura</i>        | KF768176                 |
| <i>Stomias atriventer</i>            | KF768177                 |
| <i>Stylephorus chordatus</i>         | AB280689                 |
| <i>Sudis atrox</i>                   | EU366576                 |
| <i>Symphurus atricaudus</i>          | GU440541                 |
| <i>Synaphobranchus oregoni</i>       | KX228027                 |
| <i>Syngnathus fuscus</i>             | JN312447                 |
| <i>Synodus kaianus</i>               | EU366578                 |
| <i>Talimania bifurcata</i>           | KX228028                 |
| <i>Tetraodon miurus</i>              | NC15361                  |
| <i>Thaleichthys pacificus</i>        | KX228029                 |
| <i>Thymallus brevirostris</i>        | JX960972                 |
| <i>Toxotes jaculatrix</i>            | HQ654759                 |
| <i>Trachinotus carolinus</i>         | JX034020                 |
| <i>Triacanthodes anomalus</i>        | AP009172                 |
| <i>Triacanthus biaculeatus</i>       | JF952881                 |
| <i>Triphoturus mexicanus</i>         | KJ190074                 |
| <i>Umbra limi</i>                    | EU522452                 |
| <i>Xenentodon cancila</i>            | FJ459539                 |
| <i>Xenodermichthys copei</i>         | FJ918920                 |
| <i>Yarella blackfordi</i>            | FJ918935                 |
| <i>Zanclus cornuta</i>               | JQ350417                 |
| <i>Zeus faber</i>                    | HQ945864                 |
