# Supplementary material for: Repeated and Widespread Evolution of Bioluminescence in Marine Fishes
Source: PubMed Central journal article supplement (PMC4898709; doi:10.1371/journal.pone.0155154), 2016-06-08
Supplement: pone.0155154.s005.pdf [file pone.0155154.s005.pdf]

## Supplementary Information

**Fossil calibrations.**—For further information and literature regarding the fossil calibrations, please refer to the relevant citations associated with each previously published calibration. All calibrations use soft upper bounds that represent conservative estimates based on the age of known fossil lineages that are hypothesized to represent a more stem lineage in the evolutionary history of ray-finned fishes. As a result of using these soft upper bounds for the lognormal priors, the parameters associated with each calibration have been slightly modified from their original source.

Calibration 1 (Modified from Near et al., 2012; calibration 1). Node: Crown-group Actinopterygii. First occurrence: †*Mimipiscis toombsi* and †*Moythomasia durgaringa*. Stratigraphy: lower Frasnian. Absolute age estimate: 382.5 Ma. The upper bound is based on the age of stem chondrichthyian †*Elegestolepis conica*.

Absolute age offset = 382.5 Ma

95% soft upper bound = 438 Ma

Log(Mean) = 2.17

Log(StDev) = 0.8

Calibration 2 (Modified from Near et al., 2012; calibration 2). Node: Crown-group Actinopteri. First occurrence: †*Cosmoptychius striatus*. Stratigraphy: Asbian regional

stage, but often correlated with the upper Viséan. The upper bound is based on the age of †*Mimipiscis toombsi* and †*Moythomasia durgaringa*.

Absolute age offset = 325.5 Ma

95% soft upper bound = 382.5 Ma

Log(Mean) = 2.475

Log(StDev) = 0.8

Calibration 3 (Modified from Arratia 2013). Node: Stem lineage Teleostei, dating the MRCA of Teleostei and *Amia*. Occurrence: †*Prohalecites*, the oldest stem teleostomorpha. Stratigraphy: Middle/Upper Triassic, Ladinian-Carnian boundary. The soft upper bound is based on the age of †*Cosmoptychius striatus*.

Absolute age offset = 237 Ma

95% soft upper bound = 325.5 Ma

Log(Mean) = 2.915

Log(StDev) = 0.8

Citation: Arratia G (2013) Morphology, taxonomy, and phylogeny of Triassic pholidophorid fishes (Actinopterygii, Teleostei). *Jour Vert Paleo* 33(6): 1–138.

Calibration 4 (Modified from Near et al., 2012; calibration 5). Node: Stem lineage Notopteridae, dating the MRCA of *Gymnarchus*, *Gnathonemus*, *Xenomystus*, and *Chitala*. First occurrence: †*Palaeonotopterus greenwoodi*. Stratigraphy: uppermost

Albian- lowermost Cenomanian. The upper bound is based on the age of stem teleost †*Pholidophorus*.

Absolute age offset = 99.6 Ma

95% soft upper bound = 220 Ma

Log(Mean) = 3.223

Log(StDev) = 0.8

Calibration 5 (Modified from Near et al., 2012; calibration 6). Node: Stem lineage Chanidae, dating the MRCA of *Chanos* and *Cromeria*. First occurrence: †*Rubiesichthys gregalis*. Stratigraphy: Berriasian-Valanginian. The upper bound is based on the Tithonian stem-lineage ostariophysian †*Tischlingerichthys viohi*.

Absolute age offset = 133.9 Ma

95% soft upper bound = 150 Ma

Log(Mean) = 1.26

Log(StDev) = 0.8

Calibration 6 (Modified from Davis and Fielitz, 2010). Node: Stem Lineage Euteleostei, dating the MRCA of Euteleostei, Alepocephaloidei, Clupeiformes, and Ostariophysi. First occurrence: †*Leptolepides sprattiformis*. Stratigraphy: Late Jurassic, Early Tithonian (Malm Z2) deposits. The upper bound is based on the age of stem teleost †*Pholidophorus*.

Absolute age offset = 150 Ma

95% soft upper bound = 220 Ma

Log(Mean) = 2.345

Log(StDev) = 0.8

Calibration 7 (Modified from Near et al., 2012; calibration 10). Node: Stem lineage Salmoninae, dating the MRCA of *Thymallus*, *Salvelinus*, and *Coregonus*. First occurrence: †*Eosalmo driftwoodensis*. Stratigraphy: middle Ypresian, U-Pb zircon dated to approximately 51.8 Ma. The upper bound is based on the Tithonian stem-lineage ostariophysian †*Tischlingerichthys viohi*.

Absolute age offset = 51.8 Ma

95% soft upper bound = 150 Ma

Log(Mean) = 3.019

Log(StDev) = 0.8

Calibration 8 (Modified from Davis and Fielitz, 2010). Node: Stem lineage Alepisauridae, dating the MRCA of *Anotopterus*, *Alepisaurus*, and *Omosudis*. First occurrence: †*Enchodus brevis* and †*Saurorhamphus freyeri*. Stratigraphy: Upper Cenomanian. The upper bound is based on the stem-lineage euteleost †*Leptolepides sprattiformis*.

Absolute age offset = 100 Ma

95% soft upper bound = 150 Ma

Log(Mean) = 2.344

Log(StDev) = 0.8

Calibration 9 (Modified from Davis and Fielitz, 2010). Node: Stem lineage

Myctophiformes, dating the MRCA of Myctophiformes and Acanthomorpha. First

Occurrence: †*Sardinoides*. Stratigraphy: Middle Cenomanian of Hakel and Middle

Cenomanian of Hajula deposits. The upper bound is based on the stem-lineage

euteleost †*Leptolepides sprattiformis*.

Absolute age offset = 96 Ma

95% soft upper bound = 150 Ma

Log(Mean) = 2.421

Log(StDev) = 0.8

Calibration 10 (Modified from Near et al., 2012; calibration 11). Node: Stem lineage

Polymixiiformes, dating the MRCA of *Polymixia* and Percopsiformes (*Percopsis*,

*Aphredoderus*, and *Chologaster*). First occurrence: †*Homonotichthys dorsalis*.

Stratigraphy: middle-upper Cenomanian. The conservative upper bound is based on the

minimal age of stem teleost †*Pholidophorus*.

Absolute age offset = 93.6 Ma

95% soft upper bound = 220 Ma

Log(Mean) = 1.88

Log(StDev) = 0.8

Calibration 11 (Modified from Near et al., 2012; calibration 12). Node: Stem lineage Percopsidae, dating the MRCA of Percopsiformes (*Percopsis*, *Aphredoderus*, and *Chologaster*). First occurrence: †*Massamorichthys wilsoni*. Stratigraphy: Thanetian, or middle Tiffanian NALMA. The upper bound is based on the minimal age of †*Homonotichthys dorsalis*.

Absolute age offset = 57 Ma

95% soft upper bound = 93.6 Ma

Log(Mean) = 2.032

Log(StDev) = 0.8

Calibration 12 (Modified from Near et al., 2012; calibration 13). Node: Stem lineage Aphredoderidae, dating the MRCA of *Aphredoderus* and *Chologaster*. First occurrence: †*Trichophanes foliarum*. Stratigraphy: upper Priabonian, dated to approximately 34.1 Ma. The upper bound is based on the minimal age of †*Massamorichthys wilsoni*.

Absolute age offset = 34.1 Ma

95% soft upper bound = 57 Ma

Log(Mean) = 1.563

Log(StDev) = 0.8

Calibration 13 (Modified from Near et al., 2012; calibration 16). Node: Stem lineage Lampridae dating the MRCA of *Lampris*, *Regalecus*, and *Trachipterus*. First occurrence: †*Turkmene finitimus*. Stratigraphy: uppermost Thanetian-lowermost Ypresian. The conservative upper bound is based on the minimal age of the oldest aulopiform †*Atolvorator longipectoralis*.

Absolute age offset = 55.8 Ma

95% soft upper bound = 125 Ma

Log(Mean) = 2.669

Log(StDev) = 0.8

Calibration 14 (Modified from Near et al., 2012; calibration 14). Node: Stem lineage Zeiformes, dating the MRCA of Zeiformes (*Cyttopsis*, *Zenopsis*, and *Zeus*), Gadiformes (*Lota* and *Coryphaenoides*), and *Stylephorus chordatus*. First occurrence: †*Cretazeus rinaldii*. Stratigraphy: latest Campanian-earliest Maastrichtian. The conservative upper bound is based on the minimal age of the oldest aulopiform †*Atolvorator longipectoralis*.

Absolute age offset = 70.6 Ma

95% soft upper bound = 125 Ma

Log(Mean) = 2.4278

Log(StDev) = 0.8

Calibration 15 (Modified from Near et al., 2012; calibration 15). Node: Stem lineage *Zenopsis*, dating the MRCA of *Zenopsis* and *Zeus*. First occurrence: †*Zenopsis clarus*, †*Zenopsis tyleri*, and †*Zenopsis hoernesii*. Stratigraphy: lower Rupelian [P18], lower Khadumian regional stage. The soft upper bound is based on the minimal age of †*Cretazeus rinaldii*.

Absolute age offset = 32 Ma

95% soft upper bound = 70.6 Ma

Log(Mean) = 2.0852

Log(StDev) = 0.8

Calibration 16 (Modified from Near et al., 2012; calibration 17). Node: Stem lineage Trachichthyoidei dating the MRCA of Beryciformes. First occurrence: †*Hoplopteryx lewesiensis* and †*Hoplopteryx simus*. Stratigraphy: middle-upper Cenomanian, zone of *Holoaster subglobosus*. The conservative upper bound is based on the minimal age of the oldest aulopiform †*Atolvorator longipectoralis*.

Absolute age offset = 93.6 Ma

95% soft upper bound = 125 Ma

Log(Mean) = 1.88

Log(StDev) = 0.8



Calibration 17 (Modified from Near et al., 2012; calibration 23). Node: Stem lineage Carangidae, dating the MRCA of Carangidae (*Caranx*, *Seriola*, and *Trachinotus*), *Echeneis*, *Coryphaena*, and *Rachycentron*. First occurrence: †*Archaeus oblongus*. Stratigraphy: uppermost Thanetian-lowermost Ypresian. The conservative upper bound is based on the minimal age of the oldest aulopiform †*Atolvorator longipectoralis*.

Absolute age offset = 55.8 Ma

95% soft upper bound = 125 Ma

Log(Mean) = 2.669

Log(StDev) = 0.8

Calibration 18 (Modified from Near et al., 2012; calibration 24). Node: Stem lineage Echeneidae, dating the MRCA of *Echeneis*, *Coryphaena*, and *Rachycentron*. First occurrence: †*Opisthomyzon glaronensis* and unnamed echeneid cf. *Echeneis*. Stratigraphy: Engi slates: Rupelian. The conservative upper bound is based on the minimal age of the oldest aulopiform †*Atolvorator longipectoralis*.

Absolute age offset = 30.1 Ma

95% soft upper bound = 125 Ma

Log(Mean) = 2.985

Log(StDev) = 0.8

Calibration 19 (Modified from Near et al., 2012; calibration 26). Node: Stem lineage Siganidae, dating the MRCA of *Siganus* and Scatophagidae (*Scatophagus* and *Selenotoca*). First occurrence: †*Siganopygaeus rarus*. Stratigraphy: uppermost Thanetian- lowermost Ypresian. The conservative upper bound is based on the minimal age of the oldest aulopiform †*Atolvorator longipectoralis*.

Absolute age offset = 55.8 Ma

95% soft upper bound = 125 Ma

Log(Mean) = 2.669

Log(StDev) = 0.8

Calibration 20 (Modified from Near et al., 2012; calibration 33). Node: Stem lineage Diodontidae, dating the MRCA of Diodontidae (*Diodon* and *Chilomycterus*) and *Tetraodon*. Stratigraphy: upper Ypresian. The conservative upper bound is based on the minimal age of the oldest aulopiform †*Atolvorator longipectoralis*.

Absolute age offset = 50 Ma

95% soft upper bound = 125 Ma

Log(Mean) = 2.75

Log(StDev) = 0.8

Calibration 21 (Modified from Near et al., 2012; calibration 35). Node: Stem lineage of Balistidae, dating the MRCA of *Abalistes* and *Cantherhines*. First occurrence:







CTTGCTTTCACACGGCTTTTATGCTGTTTTGCATTAGTGTCACCCGATAC  
CTCGCCATAGCCCATCACCGCTTTTACACGAAAAGATTAACCTTCTGGAC  
CTGCCTGGCTGTGATCTGTATGGTTGGACGCTCTCGGTTCGCTATGGCTT  
TCCCGCTGTACTGGATGTGGGGACCTACTCATTTATCCGGGAGGAAGAT  
CAGTGTACCTTTCAGCATCGCTCATTCAGGGCTAACGATTCGCTGGGATT  
TATGCTGCTCTTGGCCCTCATCCTACTAGCCACCCAGCTGGTCTACCTCA  
AGCTCATCTTTTTTGTGCACGACCGGAGGAAGATGAAACCCGTTTCACTT  
GTGCCAGCTGTGACCCAGAACTGGACCTTTCATGGTCCGGGGGCTAGCGG  
CCAGGCGGCGGCAACTGGTTAGCTGGCTTCGGCAGAGGCCCTACCCGC  
CTACTCTTCTGGGAATAAGACAAAAACCAACACCACGGGCAGAAGAAGA  
CTGCTCGTCCTGGATGAGTTTAAACTGAAAAGCGAATAAGCAGGATGTT  
CTACATCATGACGTTCTTCTTTTTGACCCTGTGGGGCCCCCTATCTTGTTG  
CCTGCTACTGGAGAGTGTGTTGCTAGGGGGCCGGCGGTGCCAGGGGGTTAC  
CTGACGGCCCGCTGCTGGATGAGTTTTGCCCAGGCTGGTGTCAATCCCTT  
TATCTGCATCTTTTCCAACAGGGAG-----

-----  
-----  
-----  
-----  
-----  
-----  
-----  
-----  
-----  
-----  
-----  
-----  
-----  
-----  
-----  
-----  
-----  
-----  
-----  
-----  
-----  
-----  
-----

----NNNNNNNNNGTCACCGACAGAGAAGTGGGGTTGGGGATAAATCCATTTGCTGATG  
GGATGGGCGCTTTTAAAATCAACCACAGTACCCACGATCTTGCATCTGG-  
--TCAAACGGCTTTTTCATCCCAGGCG--CCGGGGTAC--GCAGCGGC  
AGCGCTGGGG---CATCATCA-----CCACCCCTCTCATGTCAGCTCT-  
--TATTCACCGCAGCTTTCAATTCCACTCGGGACTTTCTTTTCCGAAAT  
CGGGGATTTGGTGAAGCAGCCAG-----CGCCCAACATAGCCT  
GTTTGCCTCTGC---CGCGGGAAGTTT--T-----GCGGGGGCCCATG  
GACACACAGATGCTGCTGGACATTTGCTTTTCCCGGGACTTCACGAG---  
CAGGCGACAACCTCATGCGTCTCCCAACGTTGTAAACAGTCAAATGCGATT  
AGGCTTTTCCGGAGACATGTATGGCAGAGCAGACCAGTACAGCCAGGTAA  
CAAGCCCCAGAT---CAGACCATTATGCTTCGACCCAGCTACACAGCTAC  
GGACCCATGAACATGAATATGGCTGCA--CACCATGGGGCAGGGGCCTT  
TTTTTCGTTATATGAGGCAGCCAATAAAGCAAGAACCTTATCTGTAAATGGA  
TAGAACCTGAACAGTTGACAAAACCCGAAAAGTCTTGTAACAAAACTTTT  
AGCACAATGCACGAACTAGTAACTCACCTCACAGTGGAAACATGTGGGGGG  
ACCAGAGCAAGCCAACCATATCTGCTTTTGGGAAGAATGCGCACGAGAAG  
GAAAGCCATTTAAAGCCAAGTATAAGCTTGTAATCACATACGAGTCCAC  
ACAGGTGAAAACCTTTTCCTTGTCCANNNNNNNNNNNNNNNNNNNNN

>Polyodon spatula  
AGTCTACTGATTCGTGCCGAACCTAAGCCAACCCGGTGCCTTACTTGGCGA  
TGATCAAATCTATAATGTTATCGTTCACAGCCCACGCCTTTGTCATGATTT  
TCTTTATAGTAATACCCATCATAATCGGCGGATTCGGAAATTGACTGGTC  
CCCCTGATAATCGGAGCTCCAGATATAGCCTTCCCTCGCATGAATAATAT  
GAGTTTCTGGCTCCTACCCCATCCTTCCTTCTCCTTTTGGCCTCCTCTG



-----CCC  
AACAAAGGAGGCCTTCAAGTGTGAGGAGTGC GGCAAGA ACTACAACACCAA  
GCTGGGCTACAAGCGCCACGTGGCCATGCATGCTGCCACCAACGGAGACC  
TGACCTGCAAGGTGTGCCTGCAGAGCTACGAGAGTACGCCCGTGCTACTG  
GAGCACCTCAAGAGCCACTCTGGTAAGTCCTCGGGCGGCCTGAAGGAAAA  
GAAGCATCCCTGCGACCACTGCGACCGCCGCTTCTACACCCGGAAGGATG  
TGCGCCGCCACATGGTGGTCCACACGGGCGCAAGGACTTCTATGCCAG  
TACTGTGCCAGCGCTTTGGCCGCAAGGACCACCTGACCAGGCACGTCAA  
GAAGAGCCACTCCAGGAGCTGCTAAAGATCAAGACAGAGCATCCCGACA  
TGCTGGGGCTGCTCCACTCCAGCTCGCCCATCT---CTGTGAAGGAGGAG  
CTCAGCCCCATGATGTG---CATGCCCCCTTGCAAAGACTCCATGATGGG  
CAAGCCCTTTGCCAGCT-----CTTTCCCATGAGCATGTACAACCAGC  
AC-----CTGCAGTCCATGTCCA ACTCAGGGGTCTCG-----  
-----CACACCTTGGTGCCAGTTCGCTG---GCCACCATGGGGATGGG  
TTGCCCCATGGAGTATCTAATTTATGCATCATTTTCTTTTCATGGGGTGT  
TGCAAATTAGTGATGGATCAAACATAGTCAACCTCTTACCTAGTACTCG  
CCAAGTGTCTCCTATGCACTGACCCAGCAAAAATACTTCAGTAACTACAG  
TCCTGTAATTGGGTTCTATATTTATGAGCCGATAGAGTACTGGAACACAA  
CCGTACAAGAACATTTAAATACATTAGGTCATGGGTTTAAATAGAATATCA  
TGGATTGATCATTACTTTTCAGCATTTAAAAGTCATCAATATTACTACTCC  
AACCAAAAGCGATTTTATAACTGTTCTGCAAAATTCATTCTTGATAAAAA  
AAGAATTTTCAGCACTTTAAAGATGACATCATTTTTTCCAAAA---CAGGG  
G-----ATGAAGTTGATATCATTGCATCCAGGATGTATATGGT  
TGCCAGAACCAGCGAGAACACAAGGGAAGAAGTCGTTGAATTGCTGGAAA  
GGCTAAGGCCATTGTCTCTTATCAACAGCATCAAATTTATTGTGTTTAAAT  
CCTACCTTTGTGTTTCATGGATCGCTACAGCGCCTCCATCATATCACCCAT  
TGTGACGTCTGGATTTAGTGTCTGATTGCCTTAGTCCTGACCGTCTTCC  
TAGTTATTAATCCACTTGGTA ACTTTTGGTTGATAATTACAGTCACCTCA  
GTAGAGTTAGGCGTTCTTGGCTTGATGGGATAACCACCGTTTGAGTGGCA  
GCCAGCCCTGAAGAATGTCTCTAGCAGCACAGATGTGGGGATTATTGATG  
GGTTGTCAGGCTGGACAGTTTCTGTGGAGGACTCTCAAATGGACACTATT  
GCTCGCAGGTTCCGCTATGATGCTGCCTTGGTTTCAGCCTTAAAAGACCT  
AGAGGAGGACATCCTGGAAGGCATTAATGAGCAAGGACTGGACGAATTC-  
--TCCACAGAGGTCTTCTCAGTGGTGATCAAGGAATCATGTGATGGAATG  
GGCGATGTGAGTGAGAAACACGGAGGTGGACCATCGCTCCAGAGAAAGC  
TATCCGCTTCTCCTTCACCATCATGTCTATTGCCACCAAGAACGAAGATG  
GAGAA-----AACATAAATGTC  
TTCCAGGAACACAAGCCAAACTCAGAGCTCTGCTGCAAACCCATGTGTTT  
GATGTTTGCAGATGAATCTGACCATGAGACACTGACAGCTATTCTGGGTC  
CAGTGCTGGCCGAACGGGAAGCCATGAAAGAGAGTCGCCTGATCCTGGAG  
ATTGGTGGCCTGTCTAGGTCTTTTCGATTTATCTTTAGGGGCACAGGGTA  
TGACGAGAAGCTGGTGAAGGATGTTGAAGGATTGGAGGCCTCAGGGTCAA  
CCTATATCTGTACCCTTTGTGATGCCACCAGAGCCGAAGCTGCCAGAAT  
ATGGTTCTTCACTCTGTCACCAGGAACCATGAGGAAAACCTAGATCGCTA  
TGAGATATGGCGGTCCAATCCCTACTCAGAGTCAGTGGATGAACTCCGTG  
ACAGAGTGAAGGGAGTTTCAGCTAAGCCCTTTATGGAACCCAGCCTTCC  
ATTGATGCCCTGCACTGTGACATTGGCAATGCCACAGAGTTCTACAAAAT  
ATTCCAGGATGAAATAGGGGAAGTCTACCAGAATTA---CAAC---CCTA  
CCCACGAGGAGAGGAAAAGGTGGCAATCTGCCCTAGATAAACAGCTGAGG  
AAGAAGATGAACCTTAGACCTGTGATGAGGATGAAATGGCAATTTTGCCCG  
CAAGTTGATGACTAAGGAGACAGTAGAAGCTGTTTGTGAGCTTGTCCCAT  
CTCAAGAACGAAGAGAGGCCCTCAGGGAGCTTGTGCACCTGTACCTCCAA  
ATGAAGCCTGTCTGGCGTGCCA ACTGCCAGCCAAAGAGTGCCAGACTT



GCTCTGCCGTTACAGCTTCAACTCACAGCGCTTTGCAGAGCTCCTCTCCA  
CTACCTTCAAGTACAGATATGATGGAAAGATCACCAACTACCTCCACAAG  
ACCTTGGCCCATGTGCCTGAGATCATTTGAAAGGGAGGGTTCCATAGGCGC  
CTGGGCCAGTGAGGGCAATGAGTCCGGGAACAAGACATACGCCATTGAGA  
TGGGCACCAGAGGACCCAGTGGAGTGCCAACCCAAGGCCCTTTGTCTGC  
TMCATCGAGGAGCCGATCAAGCAGACCAAATTCAGGGCATCAAGACCTA  
CATCTCCTACCGGGTGTCCCCAGCCACACAGGCAGYCCTGTCTACCGSC  
GCTACAAGCACTTCGACTGGCTCTACAACCGGCTGCTGCACAAGTTCACC  
GTCATCTCAGTACCYCACCTGCCAGAGAAGCAGGCCACTGGCCGATTCTGA  
GGAGGACTTCATCGAGAAGCGCAAAAAGGAGGCTGATCCTCTGGATGGACC  
ACATGACCAGCCACCCTGTTCTCTCCAGTATGAGGGCTTCGAACTTC  
CTCATGTGTGSCGATGACAAGCAGTGGAAAGCTGGGCAAGCGGGCAGGA  
GAAGGATGAGATGGTGGGCGCCAGCTTTCTGCTCACCTTCCAGATCCCCA  
GTGAACACCAGGACCTGCAGGATGTGGAGGACCGGGTTGACACCTTCAAG  
GCCTTCASTAAGAAGATGGACGACAGCGTGTTCAGCTCACAAACGTGAC  
CACCGAGCTGGTACGCAAGCAYGTGGGAGGCTTCCGCAAGGAGTTCAGA  
AGCTGGGCAGCGCATTCCAGTCAGTCAGCCAGGCCCTTACCCTAGACCCA  
CCCTACAGCTTCGATGCCCTCAACAACGCCATCTCCCA-CCTCTTACGAC  
TTTTCTCAAAGTACTTCCCTTGGCTTCATCATTGGGGTTGGCATGGTTG  
GTAACCTCCTGATATCCATCTTATTGGTCAAAGACAAGACCTTGCACAGA  
GCTCCCTACTACYTTTTACTTGGATCTTTGTGGTTTCAGATATACTCAGATC  
CGCAATTTGTTTCCATTTGTGTTCACTTCAGTTAAAAATGGTTCATCGT  
GGACATATGGAACACTTACATGTAAAGTGATTGCCCTCCTGGGWGTTTTG  
TCTTGCTTTTCATACTGCCTTTATGCTGTTTTTGCATCAGTGTGACTCGATA  
YCTAGCCATAGCTCATCACCGTTTCTATAYGAAAAGGCTGACGTTTGGGA  
CCTGCTTGGCTGTCAATTTGTATGGTGTGGACTCTTCCGTGGCTATGGCK  
TTTCCACCAGTCTTGGACGTGGGTACCTACTCCTTTATCAGAGAGGAAGA  
CCAGTGCACCTTCCAACATCGCTCCTTTCAGAGCCAACGACTCACTGGGAT  
TTATGCTACTTCTAGCCCTAATACTTCTCGCCACCCAGCTTGTCTACCTC  
AAGCTTATTTTTTTTTTGTCCATGATCGCAGGAAGATGAAACCAGTCCAGTT  
TGTACCAGCCGTCAGCCAAAACCTGGACTTTTTCATGGTCCAGGRGCCAGTG  
GCCAGGCGGCTGCAAACCTGGTTAGCTGGCTTTGGAAGAGGCCCTACTCCA  
CCGACCCTGCTGGGAATAAGGCAAAACACCAATACAACAGGGAGAAGACG  
GCTCCTCATTTTTGGATGAATTTAAAACCTGAAAAAGGGTTAGCAGGATGT  
TCTACATTATGACGTTTTTTTTTCTTACTTTGTGGGGCCCTATCTTGTA  
GCATGCTATTGGAGAGTGTGTTGCCAGGGGGCCCGTGGTGCCAGGGGGTA  
TCTGACAGCTGCAGTCTGGATGAGTTTTGCCAGGCTGGAGTCAATCCAT  
TTATCTGCATTTTNNNNNNNNNNNNNNN-----

-----  
-----  
-----  
-----  
-----  
-----  
-----  
-----  
-----  
-----  
-----  
-----  
-----  
-----  
-----

-----ACAGGCGA  
TGTCACCGACAGAGAAGTGGGGTTGGGAATAAACCCGTTTGCAGATGGGA

TGGGGGCTTTTAAAAATCAACCACAGTACTCATGATCTTGCMCTG---C  
CAAACCTGCATTTGCATCCCAAGCG---CCCGGGTAT---GCTGCGGCGGC  
TCTGGGG---CATCATCA-----CCATCCCACCCATGTCAGCTCG---T  
ATTCCACTGCTGCTTCAATTCAACCCGGGACTTCTGTTTCGAAACCGG  
GGGTTTGGAGAAGCGGCTAG-----CGCACAGCACAGCCTCTT  
TGCCCTGTC---TGCAGGAACTTT---T-----GCGGGGCCTCACGGGC  
ACACAGATGCTGCAGGACACCTACTTTTCCCCGGACTTCACGAA---CAG  
GCGGCCACTCATGCCCTCTCAAATGTTGTTAACAGCCAAATGCGCTTAGG  
CTTTTCTGGGGACATGTATGGCAGGGCAGACCAGTATAGCCAGGTACTA  
GTCCCAGAT---CMGATCACTATGCATCGACCCAGCTGCACAGTTACGGT  
GCCATGAACATGAACATGGCCGCC---CACCACGGTGCRGGGGCCTTYTT  
TCGTTACATGAGGCAACCCATCAAACAAGAACTTATTTGCAAATGGATTG  
AACCSGARCAATTGGCAAACCCCAAAAAGGCTTGAACAAAACCTTTTAGC  
ACAATGCACGAGCTCGTTACTCACCTCACAGTAGAGCACGTTGGGGGACC  
CGAGCAAGCGAATCATATCTGTGTTTGGGAAGAGTGTCCAGAGAAGGAA  
AACCTTCAAAGCCAAGTACAAACTTGTAATCATATCCGAGTACACACC  
GGCGAGAAACCTTCCN>NN>NN>NN>NN>NN>NN>NN>NN>NN>NN>NN>NN

>Amia calva

AGTCTCCTAATTCGAGCAGAATAAGTCAACCAGGAGCCTTGCTAGGTGA  
CGACCAGATCTATAATGTAATTGTTACAGCACATGCCTTTGTAAATAATTT  
TCTTTATAGTAATGCCCGTTATAATTGGTGGGTTTGGCAACTGGCTAGTC  
CCCCTAATAATTGGAGCCCCGGACATAGCTTTCCCCGAATAAACAACAT  
GAGCTTCTGACTGCTGCCCCATCCTTCCTACTTCTTCTTGCCCTCCTCAG  
GCGTAGAAGCGGGAGCCGGGACCGGCTGAACTGTATACCCCTCTGGCA  
AGCAACCTTGCACACGCAGGCGCATCAGTAGATTTAACCATCTTCTCCCT  
ACACTTAGCTGGAGTTTCATCCATCTTGGGGCAATTAACCTTTATCACA  
CCATTATCAACATAAAACCCCGAGCAGCCTCTCAATACCAAACACCTCTG  
TTCGTATGATCCGTCCTAATTACTGCTGTTCTACTCCTCCTATCCCTGCC  
CGTCTTGGCCCGCAGGCATCACAATGCTACTAACTGACCGAAATCTCAATA  
CCACATCTTTTGACCCTGCCGGAGGGGGCGACCCCATCTTATACCAACAC  
CTTTTCTGATTCTTCGACACCCAGAAGTATACATTTTAATTCTCCCAGG  
GTTTCGGAATAGTTTCCCATATTGTAGCATACTACGCAGGTAAAAAGAAC  
CATTCGGCTATATGGGAATAGTATGAGCCATAATGGCCATCGGCCTATTA  
GGATTCATCGTATGAGCTCACCACATGTTTACAGTTGGAATAGACGTGGA  
CACTCGAGCTTATTCCTAGAGAGAAACCTTCATCCATCCAACCTGCCTGG  
CATGCTGCTGCTGTGATGCCACCAGTGCACCAAGCTGTCAGAGCTCT  
CATGGGGCATGTGCCCTCAGCAACTTTCCCGCTATTTGCAAGACCGAGGAC  
TTCTCCAACCTGCCAAAGATATGGTGGTCCAGCTTTTGTACATGAGGA  
GCTGGAGACAGAGGATGAGAGACTGGTTTATGAAGCTGCCCTTAACGGA  
TCAACTATGACCTGGAAAAGAGACACTGTAACCTTCCAGAGCTCCTGAGA  
ACAGTGCGTCTGGCCCTGCTGCCTGCCATCTTCTCATGGAGAATGTATC  
TACCGAAGAGCTGATCAACGCCAGGCCAAGAGCAAGGAGCTGGTGGATG  
AAGCTATCCGGTGTAAAGCTGAAGATCCTGCAGAATGATGGCGTCGTTAAC  
AGCCCGTGTGCTAGACCAAGAAAAACAGCCATGCCCTCTTCTCTGCGG  
AGGGCAGACTTTCATGTGTGACAAGTTGTACCTGGTGGACCAGAAAGCCA  
AAGAGATCATCCCCAAGCTGACATCCCCAGCCAAAGGAAAGAGTTCAGC  
GCCTGCGCCATCGGCTGTAAGGTGTACATCACTGGCGGCA--GAGGCTC-  
AGAGAATGGTGTTCCAAAGATGTATGGGTCTATGACACCGTCCATGAGG  
AATGGTCAAAGGCGGCACCAATGCTCATTGCCAGGTTTGGCCATGGCTCT  
GCTGAGCTGAAGCACTGCCTCTACGTGGTAGGAGGTCACACCGCAGCGAC  
TGGCTGCCTCCCGGCTCTCCATCTTGAGGAGTACATTTGTGGTCTTTAGC  
CGTAGCATCAACAGGCTCATCCTTAATGAAGCCGAACTAATTTTGGCTCT  
GGCTCAGGAGTTTCAGATGAAGACGATCACGGTGTCTTTAGATGAGCACT

CCTTCGCAGATATCGTACAAATAATCAGTAAGGCGTCAATGCTTGTTCAGT  
ATGCACGGGGCTCAGCTGGTACCTCACTCTTCCCTGCCCCGCGGCGCTAT  
AGTGGTAGAGCTTTTCCCATATGCTGTGAACCCTGAGCACTACACGCCCT  
ACAAAACATATAGCCTCCTTGCCTGGCATGGATCTTCAGTATGTGGCCTGG  
CAAAACACCAAAGAAGAGAACTCCATTGCGTTCCCAGACAGGCCCTGGGA  
TCAAGGCGGAATAGCCCATCTAGAAAAGGAGGAGCAGGATCGCATCTTAA  
AAAGCAAGGAGGTGCCCTCGGCACTTGTGTTGCCGTAACCCGGAGTGGCTT  
TTCCGCATTTACCAGGACACTAGTGTGGACATCCCCCTCTCTTCTTGAAGT  
ACTGAG---GCAGACGGTGAAG---TYTAAGCCCAATCTGAAAAA---GT  
TTAAGCCGGCCAGCACAAATTCACCCCGGTAAAGTGCGGGAACCCAAATGC  
CAGGCTTCTGTACAAGGAACCAACGAGGCGAAGCTGACAGTGTGCTGGCA  
GATCCCTTGGAAATCTGAAGTATTTGAAAGTCAGGGAGGTCAAGTATGAAG  
TGTGGATACAGAAGAAAGACACAGGCAAAGGGACACTGGAAGATCAAATC  
ATCCAGGCCAACCCCTGCTCTGGAAGCTTTTGGCAAATGCCAAAAACTGCG  
AAATGATAACTCCTCGCGTTTTTGGCAAATTCATCCGTATTCATTTCCGGAG  
CCAGTGGGAAGCTGTCTCTGCAGACATAGAGACTTACCTTCTTGAAAAA  
TCCCGTGTACCTTTTCAGCTCAAAGCAGAAAGAAACTACCACATATTTTA  
CCAGATATTATCTAATCAAAGCCCGAGCTGCTGGACATGCTTTTAATCA  
CAAACAATCCGTACGACTACTCCTATGTGTCCCAAGGAGAAGTCACAGTT  
GCATCTATAGATGATGCTGAAGAAGTATCGCCACGGACAGTGCCTTTGA  
TGTGCTTGGCTTACCACAGAAGAAAAAATGGGGGTCTATAAACTAACAG  
GTGCCATCATGCATTATGGGAACATGAGGTTCAAGCAAAGCAGCGTGAA  
GAGCAGGCAGAGCCCGATGGCAGTGAGTCTGCTGACAAGTCAGCATACCT  
GATGGGACTCAACTCAGCTGACCTCTTGAAGGACTTTGCCACCCCAAGG  
TGAAAGTCGGCAATGAGTATGTAACCAAGGGCAAAGTGTGTAACAGGTT  
TACTATCCGAACAAGGAGGCTTTCAAGTGCAGGAGTGTGGCAAGAATA  
CAACACCAAGCTGGGCTACAAGCGGCACGTGGCCATGCACGCTGCCACCA  
GTGGCGACCTCACCTGCAAAGTGTGCCTGCAGACGTACGAGAGCACGCCT  
GTGCTGCTGGAGCACCTCAAGAGCCACTCGGGCAAGTCCTCCGGCGGCAC  
CAAGGAGAAGAAGCACCCCTGCGACCCTGTGACCGCCGCTTCTACACCC  
GCAAGGATGTGCGGCGCCACATGGTTGTACACACGGGGCGCAAGGACTTC  
CTGTGCCAGTACTGTGCCAGCGCTTTGGCCGCAAGGACCACCTGACCCG  
GCACGTCAAGAAGAGCCACTCTCAGGAGCTCCTGAAGATCAAATCGGAGC  
CACCCGACATGCTAGGCCCTCCTCAACTCAGGCTCACCCATCT---CTGTG  
AAGGAGGAGCTCAGCCCATGATGTG---CATGGCTGCCTCCAAGGACAA  
CATGATGGGCAAGCCCTTCAGTAACA-----GCTTCCCATGGGCATGT  
ACAACCCACAC-----CTCCAGGTCATGTCCAACCTCAGGAGTGTCA  
CAC-----TCGCACACCTTGGTGCCGAACCTACTG---GCCGAYAT  
GGGAATGGGCTGCCCCAT---TACCTAATTTATGCATCGTTTTCTTTTA  
TGGGATGTTTACAAATTAGTGATGGGTCAAACATCGTCAACCTCCTAGCC  
AGTGATTCACCGAGCGTATCCTATGCTCTCACACAGCAAAAATACTTTAG  
CAACTACAGTCCTGTCAATTGGATTCTACATTTATGAGCCGATAGATTATT  
GGAATACAACCTGTTTCAGGACCACCTGAAGACCTTGGGTCATGGGTCAAT  
AAAATATCATGGATTGATCATTACTTTCAGTATCTAAAGGTAGTAAACAT  
CAGTGCATCGACCAAAAGTGATTTTCATAACTGTCTCCAGAGTTCCTTCT  
TAAGGAAGCCAGAATTTCAACACTTTAAGGAAGACATTATTTTTTCCAAA  
A---CCGGGG-----ATGACATTGATATAATTGCGTCCAGAAT  
GTACATGGTGGCAAGAACAACGGAGAAAACAAGAGAGGAAGTCGTGGAAT  
TGTTGGATAGGCTTAGGCCCTTTCTCTCATCAACAGCATCAAATTTATA  
GTGTTAACCCACCTTTGTGTTTCATGGATCGTTACAGCTCCTCTGTTCAT  
TTCACCGATCCTGACCTCTGGATTTCAGTGTCTTGATTGTTTTAATTCTGA  
CATTCTTCCCTAGTCATTCATCCTCTTGGCAACTTTTGGTTGATACTAACA  
GTTACATCTGTAGAGCTAGGNNNNNNNNNNNNNNNNNN-----

-----ACACAGAGGTGGGGATTATAGATGGGCTGTC  
TGGCTGGGTGGCTTCTGTGGATGACCAACAGATCAACACCATCTCCCGCA  
GGTTTCGCTATGATGTGGCTCTTGCCGCTGCTTTGAAGGACTTTGAAGAG  
GACATTGTGGAAGGCATGAGGGAGCAGCAGCTGGATGACAGC---TTGAC  
TGAKAGTTTCACTGTGATCATCAAGGAGGCTTGGGATGGCATGGGAGACG  
TCAGCGAGAAACATGGGAATGGCCAGCTCTTCTGAGAAAGCTGTCCGC  
TTCTCCTTACCATCATGTCTATTTCCGCCACAGCGAAGATGGG-----  
-----AAAAATGTCAAGATCTTCCAGG  
AGCTCAAACCTAACTCAGAGCTCTGCTGCAAGCCCCGTGCCTTATGTTT  
GCGGACGAATCTGACCATGAAACGCTGACTGCTATATTGGGGCTGTAGT  
GGCTGAGCGGGAAGCCATGAAAGAAAAGCCGCTTGATCCTTTCAATTGGGG  
GCATGCTGAGGTCTTCCGGTTTGTGTTTAGGGGCACAGGCTATGATGAG  
AAATTGGTCAAGATGTGGAAGGACTTGAGGCTTCAAGGCTACTTACAT  
CTGCACCCTTTGTGATTCCACCAGAGCAGAAGCTTCTCAGAATATGGTGC  
TGCACACAATCACCAGGAGCCACGAGGAGAACCTAGAACGCTATGAGATC  
TGGAGGACCAACCCATACTCAGAGTCGGCCGATGAGCTGCGTGATCGGGT  
CAAAGGGGTTTTCAGCAAACCGTTCTTGGAAACGTTGCCCTCCATCGATG  
CGCTGCACCTGTGACATCGGGAATGCCACCGAGTTTACAAGATCTTCCAG  
GATGAAATTGGAGAGCTCTACATCAAAAG---CAAC---CCCACCCGGGA  
GGAACGGAAGCGGTGGCAGTCTGCCCTAGACAAGCAGCTGAGGAAGAAGA  
TGAACCTTAAGCCATCATGAGAATGAATGGCAATTTTGCCCGCAAACCTG  
ATGACCAAGGAGACGGTGGATGCTGTGTGTGAGCTGGTTCTTCTGAGGA  
GCGCCGAGAAGCTCTCAAGGAGCTGATGAATCTCTACCTCCAAATGAAAC  
CTGTTTGGCGCTCCACCTGCCAGCCAAAGAGTGTCTGACTTGCTGTGC  
CGCTATAGCTTCAACTCGCAACGTTTGGCGAGCTCCTATCTTCCACCTT  
CAAATACCGCTACGATGGCAAGATCACCATTACCTGCACAAGACCCTCG  
CTCACGT-----  
-----ACTTACCAAGTCGAGATGGGTTT  
CAGAGGCCACAGTGGAAGGCAACCCAGGCCTTTTCTTGTTCATTG  
AGGATCCCCTAAACAGACCAAATCAAGGCATCAAGACCTACATTTCC  
TATCGGGTGACACCCAGCCACACAGGCAGGCCTGTCTACCGCCGCTACAA  
GCACTTTGACTGGCTCTACAACCGGCTACTGCACAAGTTCACAGTTATCT  
CCGTGCCCCACCTGCCGAGAAGCAGGCCACTGGGCGCTTCAAGAGGAC  
TTCATTGAGAAGCGGAAGCGGAGGCTAATCCTGTGGATGGACCACATGAC  
CAGCCACCCAGTGCTCTCCAGTATGAAGGCTTCGAGCACTTCTCATGT  
GTGCAGATGACAAACAATGGAACCTGGGTAAGCGGCGGGCCGAGAAGGAC  
GAGATGGTGGGTGCCAGCTTCTCCTCACATTTAGATTCCCAATGAGCA  
CCAGGACTTGCAGGATGTGGAGGAGCGGGTAGACTCCTTCAAGGCCTTCA  
CCAAGAAGATGGATGATAGTGAATGCAGCTCACCCATGTGGCCTCCGAG  
CTTGTGCGCAAACACTTGGGTGGATTCCGCAAGGAGTTCCAGAAGCTGGG  
CAATGCCTTCCAGTCTGTGAGCCAGGCTTTTGCCTTAGATCCCCCATA  
CCTCAGAGGCCCTCAACAAGCAAATCTCCANNNNNNNNNNNNNNNNNNNNNTGACGTCCCTCGGTTT  
TAT  
CATTGGAGTCGGTGTGGTTGGCAATCTCCTGATCTCTATCCTGCTCGTCA  
AAGACAAAACCTTGCACAGGGCACCCACTACTTCTTACTGGATCTGTGT  
GGCTCAGACATCCTGAGGTCTGCGATTTGTTTCCCTTTTGTGTTCACTTC  
GGTCAAAAATGGGTCAACGTGGACATATGGTACACTTACATGCAAAGTAA  
TTGCCCTCCTAGGAGTTTTATCTTGCCTTTCACACTGCCTTTATGTTATTT  
TGATCAGTGTGACACGGTATCTCGCCATAGCCCACCACCGCTTCTATAC  
AAAAAGGCTGACGTTCTGGACTTGTCTGGCTGTCTGCATGGTGTGGA  
CGTTGTGAGTGGCTATGGCTTTCCCCCAGTCTTGGACGTGGGGACCTAT  
TCTTTCATCAGGGAAGAAGATCAATGCACCTTCCAGCACCGATCCTTCAG  
AGCCAACGATTCCCTGGGATTTATGCTCCTCCTAGCCCTCATCTTCTGG

CCACTCAGCTTGTCTACCTCAAGCTAATCTTTTTTCGTCCATGACCGCAGA  
AAAATGAAACCAGTCCAGTTTGTGCCGGCTGTGAGCCAGAACTGGACATT  
TCACGGTCCAGGAGCCAGTGGTCAGGCGGCTGCCAACTGGCTAGCTGGCT  
TCGGAAGAGGCCCAACCCACCAACCCTGTTAGGAATAAGGCAGAATACC  
AATACGGCAGGCAGGAGAAGGCTTCTGGTGTGGACGAGTTTAAGACTGA  
AAAGAGGATAAGCAGGATGTTCTACATAATGACGTTCTTCTTTCTCACCT  
TGTGGGGCCCCCTATCTGATAGCTTGCTATTGGAGAGTGTTTGCCAGGGGG  
CCAGTTGTGCCAGGAGGTTACCTGACAGCTGCAGTCTGGATGAGTTTGC  
CCAGGCAGGAGTCAATCCATTTNNNNNNNNNNNNNNNNNNNNNNNNNNNNNN-----

----

-----  
-----  
-----  
-----  
-----  
-----  
-----  
-----  
-----  
-----  
-----  
-----  
-----  
-----  
-----  
-----  
-----  
-----

-ACAGCGGATGTCACCGACAGAGAAGTGGGGTTGGGGATAAAATCCGTTTG  
CTGATGGGATGGGCGCTTTTTAAAATCAACCACAGTACCCACGATCTAGCT  
TCTGG---CAAACGGCTTTTTTCGTCCCAAGCG---CCTGGTTAT---GC  
GGCCGCAGCTCTGGGG---CATCATCA-----CCACCCCTCCCATGTAA  
GCTCC---TATTCYACCGCGCTTTCATTTCTACACGGGACTTTCTCTTT  
CGAAATCGGGGTTTCGGAAGAAGCGGCCAG-----CGCTCAGCA  
CAGCCTCTTTGCGTCTGC--AGCAGGAAGTTT---T-----GCGGGG  
CACATGGACACACAGATGCCACAGGACACTTACTTTTCCCCGGACTTCAC  
GAG---CAGGCGACCACTCACGGGCTCTCCAATGTTGTAAATAGCCAGAT  
GCGCTTGGGCTTTTCTGGGACATGTACGGCAGAGCCGAGCAATACAGCC  
AGGTAACAAGCCCCAGAT--CAGATCACTATGCGTCGACCCAGTTACAC  
AGTTATGGCCCTATGAACATGAACATGGCTGCA---CACCATGGGGCAGG  
GGCCTTTTTTCGGTATATGAGGCAACCTATAAAAACAAGAACTTATCTGCA  
AATGGATTGAACCGGAGCAGTTGAGTAACCCGAAAAAGTCTTGTAATAAA  
ACTTTTAGCACAAATGCATGAGCTCGTCACTCACCTCACAGTGGAGCATGT  
TGGGGGACCAGAACAGTCAATCATATCTGTTTCTGGGAAGAGTGTCCA  
GGGAAGGGAAACCGTTTAAAGCCAAGTACAACTGGTAAATCACATCCGA  
GTGCACACAGGCGAGAAACCGTTTCCATGTCCGTTCCTGGCTGTGGCAA  
A

>Abalistes stellatus  
AGCTTGCTAATCCGAGCAGAATTAAGCCAACCCGGCGCTCTCTTAGGCGA  
CGATCAAATTTATAATGTCATCGTCACAGCACATGCTTTCGTAATAATTT  
TCTTTATAGTAATAACCAATTATGATTGGAGGCTTTGGAAATTGATTAATT  
CCATTAATGATTGGAGCCCCTGACATAGCATTTCCCCGAATAAACAACAT  
GAGCTTTTGACTTTTACCCCCCTCCCCTCCTTCTCTACTCGCTTCTTCAA  
GCGTAGAGGCCGGGGCCGGAACCTGGGTGAACAGTGTACCCCCCTCTTGCC  
GGCAATCTAGCCCATGCAGGGGCTTCCGTAGACCTGACTATTTTTTCTCT  
TCACCTAGCAGGAATTTGTCATCCCTTGGAGCAATTAATTTTATTACAA  
CAATTATTAATATGAAACCCCTGCCATCTCCCAATATCAAACACCACTA

TTCGCTGAGCAGTCCTAATCACAGCCGTTCTCCTTCTCCTTCCCTTCC  
TGTCTAGCCGCCGAATCACGATACTACTTACCGACCGAAATTTAAATA  
CCACATTTTTTTGACCCCGCCGGAGGTGGGGACCCAATCCTCTATCAGCA-

-----  
-----

-----NNNNNNNNGAGAAACCTTACCCATCTAACTGCCTTGGCATGCTGC

TGCTGTCTGACGCCACCAGTGCACCAAGCTGTCCGAGCTGTCTGGGGC  
ATGTGCCTCAGCAACTTCCC GCCATTTGCAAGACGGAGGACTTCTTGCA  
ACTGCCCAAAGATATGGTGGTGCAGCTTTTGTCGCACGAGGAGCTAGAGA  
CCGAAGATGAGAGACTGGT TTTATGAAGCGGCCCTGAACTGGATCAACTAC  
GACCTGGAAAAGAGGCACTGCCACCTTCCC GAGCTCCTGAGAACGGTCCG  
YCTGGCACTTCTGCCCGCCATCTTTCTCATGGAGAATGTCTCTACAGAAG  
AGCTGATCAACGCCCAGGCCAAGAGCAAGGAGCTGGTGGACGAAGCTATC  
CGATGCAAGCTGAAGATCCTGCAGAATGACGGCGTTGTTAACAGTCCGTG  
TGCTCGGCCGAGAAAAACCAGCCACGCTCTCTTTCTTCTGGGTGGGCAA  
CGTTCATGTGTGACAAGTTGTATCTGGTGGACCAGAAGGCCAAAAGAGATC  
ATCCCCAAGGCGGACATTCCTAGCCCTAGGAAGGAGTTTAGTGCCGTGTGC  
CATTGGCTGCAAGGTGTACATCACTGGAGGAA--GGGGCTC-TGAGAACG  
GTGTGTCCAAAGATGTGTGGGTCTACGACACAGTCCACGAGGAATGGTCT  
AAAGCAGCGCCATGCTTATCGCCAGGTTTGCCACGGCTCTGCAGAGCT  
GAAACACTGCCTCTACGTGGTAGGANNNNNNNNNNNNNNNNNNNNNNNNNNNN  
TGAATATATTGTTGTGTTCAGT

CGCTCAACAACGAGGCTGATACTGAATGAAGCCGAGCTAATTATGGCGCT  
GGCGCAGGAGTTTCAGATGAGAGTGGTTACGGTGTCACTGGAAGAGCAGT  
CTTTCCCCAGTATCATCCAGGTGATCAGCGGTGCTACCATGTTAGTCAGC  
ATGCATGGAGCTCAGCTCATCACCTCACTCTTCTGCCCAGAGGAGCTGC  
TGTGGTTGAGCTGTTTCCCTTTGCAGTGAACCCGGAGCAATACACCCCAT  
ATAAAACCCTTACATCCCTTCCAGGTATGGACCTTCACTATATTTCTTG  
AGAAACACGAAGGAGGAGAACACCATCACCCATCCGGACAGACCCCTGGGA  
ACAAGGGGGCATCGCTCACTTAGAGAAGGAGGAGCAAGAGAGGATACTGG  
CGAGCAAAGATGTCCCAGGCACCTGTGCTGCCGCAATCCAGAGTGGCTT  
TTCCGGATCTACCAGGACACCCCTGGTGGACATTCCGTCCTTCTTGGAAGT  
CCTCAA---GGAGGGCTTAAAA---ACAAAGCCCACTTTAAAAAA---GT  
CAAAGCCAGCCAGCTCGCTGCACCCAGGCCGGGTCAGAGAACCCTCAGTGT  
CAGACCTCAGTACAGACCAGTAATGAGGCTAAACTCACAGTCTCCTGGCA  
GATCCCATGGAATCTGAAATACCTGAAGGTGAGAGAGGTGAAATNNNNNNNNNN  
GACACCAGCAAGGGGACCCTTGAGGATCAAATCATTCAGGCCAACCCCGC  
CCTGGAGGCCTTCGGAAACGCCAAAACGGTGAGAAAACGACAACCTCATCTC  
GGTTTGAAAATTTCATCCGGATTCACTTTGGTCCGAGCGGCAAGCTGTCA  
TCAGCTGACATTGAGACATACCTGCTGGAGAAGTCACGTGTCACCTTTCA  
GCTCAAGTCTGAGAGGAATTACCACATCTTCTACCAGATTCTGTCCAATC  
AGAAGCCAGAACTGCTGGACATGCTGCTGATCACCACAACCCCTACGAC  
TACTCTACATCTCCCAGGGAGAGGTAACAGTGGCCTCCATCAACGATTC  
CGAGGAGTTGATGGCCACCGACAGCGCCTTCGATGTGCTGGGCTTACGG  
TCGAGGAGAAGATGGGCGTCTACAACTGACTGGCGCCATCATGC ACTAC  
GGCAACATGAAGTTCAAACAAAAGCAGCGCAGGAGCAGGCCGAACCCGA  
TGGGACAGAAGCTGCCGATAAATCGGCTTACCTCATGGGCCTGAACTCTG  
CTGACCTCATCAAAGGGCTGTGCCACCCCGAGTCAAGGTGGGCAATGAA  
TATGTCACCAAAGGCCAGAGCGTAGACCAAGTCTACTACCCTAACAAAGA  
GGCCTTCAAGTGTGAGGAGTGTGGGAAGCACTACAACACCAAGTTGGGAT  
ATAAGCGCCACGTGGCCATGCACTCTGCCACAGCAGGTGATCTCACCTGT



NNNNNNNNNTCTTACACAATTGAGATGGGTCTCTGGGGCCC  
CAATGGAAGGAGAGCCCACAGCCCTTCTCCTGCTCCATCGAAGACCCAAC  
AAAGCAGACAAAGTTCAAGGGCATTAAAGACGTACATATCGTACCGGGTGA  
CGCCGAGCCACACTGGGCACCCTGTCTACCGGCGCTACAAACACTTTGAC  
TGGCTGTACAACCGCCTACTGCACAAGTTTACTGTGATCTCTGTGCCTCA  
CCTGCCCGAGAAACAGGCCACGGGGCGATTTGAGGAAGACTTCATCGAGA  
AGCGCAAGAGGGCGACTGATCCTGTGGATGAACCACATGACCAGTCACCCC  
GTCTCTCCCAGTACGAAGGCTTTGAACACTTTCTGATGTGCGCCGATGA  
CAAGCAGTGGAACTGGGCAAGAGGCGGGCGGAGAAGGACGAGATGGTGG  
GTGCGCATTTTCATGCTGACCCTCCAGATCCCAAACGAGCACCAGGACCTG  
CAGGACGTTGAGGAGCGTGTGACTCCTTCAAGGCC TTCGCCAAAAAGAT  
GGATGACAGCGTGATGCAGCTCACGCACGTTGCCTCGGAGCTGGTGC  
AACACCTGGGTGGATTCAGGAAGGAGTTCCAGCGGCTGGGGAATGCCTTC  
CAGTCAATCAGCCAGGCGTTCATGCTGGACCCTCCCCACAGCTCAGAGAC  
CTTGAACAACGCCATCTCCCATNNNNNNNNNNNTTCTCAAACCTGACCTCTCTTGGCTTCA  
TCATCGGTGTGCGGCGTGGTTCGAAACCTCCTGATCTCCATCCTGCTGGT  
AAAGATAAGAGCCTGCACCGAGCGCCCTACTATTTCTGCTGGACCTGTG  
CGCCTCGGACATTTCTCGATCCGCCATCTGCTTCCCGTTTGTCTTCACCT  
CCGTCAAGAATGGATCCGCGTGGACGTACGGCACGCTGACCTGCAAGGTG  
ATCGCCTTCTGGGCGTGTCTCTCTGTTTTCCACACGGCCTTTATGCTGTT  
CTGCGTTAGTGTACGCGCTATTTGGCCATAGCGCACCACCGTTTCTACA  
CCAAGAGGCTGACCTTCTGGACCTGCCTGGCCGTCATCTGCATGGTTTGG  
ACGTTGTGCGGTGGCGATGGCGTTCCCGCCGGTGCTCGACGTGGGGACGTA  
CTCTTTTATCCGGGAGGAGGACCAGTGCACATTCCAGCACCAGCTCCTTCA  
GGGCGAATGACTCCTTGGGCTTCATGCTCCTCCTGGCTCTCATCCTCCTC  
GCCACACAGCTGGTTTACCTCAAGCTCATCTTTTTCGTTTACGACCGCAG  
GAAGATGAAGCCTGTCCAGTTTGTGCCTGCTGTTAGCCAAAACCTGGACAT  
TCCACGGGCCGGGCGCCAGCGGGCAGGCCGCGCCAACCTGGCTGGCTGGA  
TTCGGGCGAGGCCCCACCCACCGACTCTGCTGGGTATCCGGCAGAACAG  
CAACGCGGCGGGCCGAGGCGTCTTCTGGTACTGGATGAGTTCAAACAG  
AGAAGAGGATTAGTAGGATGTTCTACATCATGACGTTTTTCTTCTTGGCA  
CTGTGGGGGCCCTATTTGGTTCGCTGCTACTGGCGGTTATTTGCGAGGGG  
CCCCGTGGTCCCCGGAGGCTACCTGACAGCAGCCGTGTGGATGAGCTTTG  
CCNNNNNNNNNNNNNNNNNNNNNNNNNNNNNNNNNNNNNNNNNNNNNGCCAAATCTCGCTTTCACCTGG  
CATGGGACTGGTCTTGGCACGGA  
GC---GCAGCGTCCCCTCGGCAACAGCTTGCTGTCCCCGAGCAAACCG  
AGGAGCCCCTGTTGCCACCCCCCGCAGCGATGGTTTGTACCC---CT  
GCCAACAACCGACTGGACTTTGCTGCCTCGGCATACGACGCGGCC-----  
----GATTCGCGGGTAACGCGGCCACCTTGCTGTCTACGCAGCGGCCG  
GAGTGAAGGCTC-----TCCCCCTGCCACTGCGGGCTGCTCCAACCG  
CCTCTTGGTTATTACGCAGACCCGTCGG---GCTGG---GGAGGACGCAC  
GCCGCCGAGTACTGTGGCGTCAACAGCAAGTCCAGCTCGGTCTTCTCCT  
GCTGGCCTTCCAACCTCCATCGCGGGCAGAGCGGGCG---CC---AACTAC  
CTGG-----CCGAGGA---GGC---GACC---CGTGCCACGGA  
GAGGTGCGCG---AT---CGGCGGCGCCGAGGAG---ACCAAACCGAAGG  
ACATAAG---CTCGGA---GTCGAACGGATAGAG---ACGCCGTCTCC  
ATCAAGTCCATAGATTCGAGCGACTCTGGGATCTTTG---AACAGGCCAA  
ACGGAGGCGGATCTCACCTTCTGCCACGCCG-----GTGTCAGAGG  
CAGTGTCCCCGCTGAAGTCTGAGCATCACTCAACAGGCGAAGTCACGGAG  
AGAGAAGTGGCGCTGGGGATAAATCCGTTCGCGGACGGGATGGGCGCCTT  
CAAGATAAACACAGCTCCCACGACATTGGCTCCGG---GCAGACGGCGT  
TTTCTCTCAGGCG---CCGGCTACGCGGCGGGCAGCCCTGGGA---  
CACCATCA-----CCACCCGACCCAGTTGGCTCT---TACTCCACGGC





-----  
-----  
-----  
-----  
-----  
-----  
-----  
-----

-----AAGAAAGACTCCAGTAAGGGGACCCTGGAGGATCAGATCATCCAG  
GCCAACCCAGCGCTTGAGGCCTTTGGGAACGCCAAGACGCTCAGGAACGA  
CAACTCGTCTCGTTTTGGAAAGTTCATACGGATCCACTTTGGAACGAGCG  
GGAAGCTGTCTCGCCGACATCGAGACGTACCTGCTGGAGAAGTCCCGC  
GTCACCTTTTCAGCTCAAAGCTGAGAGGAACTACCACATCTTCTACCAGAT  
CTTGTCCAATCAGAAGCCGGAGCTGCTGGACATGCTTTTGATCACCAACA  
ACCCGTACGACTACTCCTACATCTCGCAGGGAGAGGTAACAGTGGCCTCC  
ATCAACGACGCAGACGAGCTGATGGCCACCGACAGTGCCTTCGACGTGCT  
TGGCTTCACACCCGACGAGAAGATGGGCCTGTACAAGCTGACGGGCGCCA  
TCATGCACACGAAATATGAAGTTTAAGCAGAAGCAGCGTGAGGAGCAG  
GCGGAGTCAGACGGGACTGAAGCGGCGGATAAATCGGCGTACCTCATGGG  
GCTGAACTCCGCCGACCTCATCAAGGGGCTGTGCCATCCCAGGGTGAAGG  
TGGGGAACGAATACGTGACCAAAGGACAGAGTGTGGACCAAGTCTACTAC  
NNNNNNNNNNNNNNNNNNNNNNNNNNNNNNNNNGGGAAGCACTACAACACCAAGCTGGGATACAAGCGCC  
ATGTGGCCATGCA  
CTCGGCCACAGCGGGGATCTCACCTGTAAAGTGTGCATGCAGACCTACG  
AGAGCACGCCGGTTCTCCTAGAGCACCTCAAGAGTCACTCCGGGAAGTCT  
TCAGGCGGCACCAAGGAGAAAAACACCCCTGCGATCACTGCGACCGTCTG  
ATTCTACACGCGGAAGGATGTGAGACGACACATGGTGGTTACACGGGCA  
GAAAGGACTTCCTGTGTCACTACTGCGCCAGCGCTTCGGCAGGAAGGAC  
CACCTGACGCGTCACGTGAAGAAGAGCCACTCGCAGGAGCTGCTGAAGAT  
CAAGACGGAGCCTCCTGACATGTTGGGTCTGTTGGCGTGGGGTTCGCCCC  
CCTGCTCTGTGAAGGAGGAGCTCAGCCCCATGATGTGCGGTATGGGTCT  
AACAAAGACCCCATGATGGGCAAACCTTCCCCAGCGGGGCTCCTTTCCC  
GATGGGCATGTACAACCCCCACCAC-----CTCCAGGCCATGTCTAATT  
CAGGGGTGGGTACCCCT-----CACCCGTCCCTGGTGGCCACCTCCTTG  
TCTGCAGCTATGGGCATGGGCTGCCANNNNNNNNNNNNNNNNNNNNNNNNNNNNNNNNNNNNNNNNNNNNNN  
NNNNNNNNNNNNNNNNNNNNNNNNNNNNNNNNNNNNNNNNNNNNNNNNNNNNNNNNNNNNNNNNNNNNNN  
TCCAAGTGTTTTCTTTGCTATGACCCAGCAGAAATACTTCAGTAACTACA  
GTCCAGTGATTTGGTTTTACATTTACGAGCCCATTTGAATATTGGAACCTCA  
ACGGTACAGGAGCACCTGAAGACTCTGAGTCATGGCTTCAACAAGATCTC  
CTGGATGGACAACCTTTTCCACTACCTGAGGATGGTGAATGTGAGTGCCT  
CAACCAAGAGTGACTTCATCAGCATCCTTAAGGGCTCCTTCCCTGCGCAGC  
CCGGAGTACCAGCACTTCACTGAGGACATCATCTTTACAAAGA---ACCG  
CGACACTG-----ATGAGTATGACATTATTGCCTCGCGGATGTATTTGG  
TGGCGAGGACGACAGAGAAAAAGCGCGAGGAGGTGGTGGAGCTTTTGGAG  
AAGCTTCGTCCATTGATGCTGATCAACAGCATCAAATTCATTGCCTTCAA  
TCCTACGTTTTGTGTTTCATGGACCGCTACAGCTCCTCTGTTCATCTCACCCA  
TTCTGACCTCAGGCTTCAGCGTGCTCACAATCCTCATCCTCACTTTCTTC  
CTGGTCATCAACCCCTTGGAAAACCTCTGNNNNNNNNNNNNNNNNNNNNNNNNNNNNNNNNNNNNNNN  
NNNNNNNNNNNNNNNNNNNNNNNNNNNNNNNNNNNNNNNNNNNNNNNNNNNNNNNNNNNNNNNNNNNN  
GGCATTATTAATGGGCTGTCTGGATGGGTTTTCTCGGTGGATGACTCCCC  
AGCTGACACTATCACTCGACGCTTTCGCTATGATGTGGCACTGGTGTCAG  
CGATAAAGGATCTGGAGGAGGACATCATGGAGGGGCTGAGAGAGAGCGGG

TTGGAAGACAGTGCATGCAACGCAGGCTTCAGTGTCATGATCAAAGAATC  
CTGTGATGGTATGGGCGATGTCAGTGAGAAGCACGGCGGAGGACCGGCTG  
TTCTGAGAAGGCTGTGCGTTTTTCTTTCACTGTATGTCTGTCTCTGTCT  
CTGGCAGACGGCAAGAAG-----GA  
AGAAGTTACCATCTTCACCGAGCCGAAGCCAAACTCAGAGCTGTCCGTGTA  
AGCCACTTTGCTTAATGTTTGTGGATGAGTCAGACCATGAGACTCTCACA  
GCCATCCTTGGGCCTATAATTGCAGAGCGTGATGCGATGCAGCAGAGCCG  
ACTCATCCTGTCCATGGGTGGACTACCTCGATCTTTTTCGCTTTCACTTTA  
GAGGCACGGGATATGACGAGAAGATGGTGCCTGAGATGGAGGGCCTGGAG  
GCCTCGGGATCATCTACATTTGCACTCTTTGTGACTCCAGTCGTGTAAA  
TGCCCTCGAAAACATGGTGTACACTGCATAACTCGCAGTCATGAGGAGA  
ACCTAGAGCGTTATGAATTATGGAGAACCAACCCCTTTTCTGAGCTGCA  
GATGAGCTGCGAGATAGAGTCAAAGGGCTCTCTGCCAAGCCCTTCATGGA  
GACCCATCCACAATGGATGCATTACACTGTGACATCGGCAATGCCACAG  
AGTTCTACAAAATCTTCCAGGACGAGATCGGGGAAGTGTACAAAAGGT--  
--CAAC---CCAAGCCGGGAGGAACGGCGCAGCTGGAGGGCCGCCCTAGA  
TAAACAGCTGAGGAAGAAGATAAAGCTTAAACCCGTAATGAGGATGAATG  
GGAACCTTTGCCCGCAAGCTAATGACCAGGAGGCTGTGGAGGTGGTGTGT  
GAGCTAGTGCCTTCGGAGGAGCGCAGACAGGCCCTGAGGGAGCTTATGAG  
ACTCTATCTCCAGATGAAGCCAGTGTGGCGGCCACCTGTCCGGCCAAAG  
AGTGCCCAGACCAGCTGTGCCGCTACAGCTTCAACTCTCAGAGCTTTGCC  
GACCTCCTCTCTCTACCTTCAAATATAGATACAAAGGGAAGATAACCAA  
TTACCTGCACAAGACCCTGGCCATGTGCCTGAAATCATAGNNNNNNNNNNNN  
NNNNNNNNNNNNNNNNNNNNNNNNNNNNNNNNNNNNNNNNNNNNNNNNNN  
NNNNNNNNNNNNNNNNNNNNNNNTCGTACACC  
ATCGAAATGAGCCCCCTTGGTCCGGGGTGAAGGAGAGTCCACAGCCGTT  
CTCCTGCTCCATCGAAGACCCGACAAAACAGACCAAGTTCAAAGGCATCA  
AGACGTACATCTCGTACCGGGTGACGCCGAGCCACACCGGGCGTCCCGTC  
TACAGGCGATACAAACACTTTGACTGGCTTTACAACCGCCTACTGCACAA  
GTTCACTGTGATCTCCGTGCCCCACCTGCCYGAGAAGCAGGCCACGGGCC  
GCTTTGAGGARGACTTCATCGAGAAACGCAAACGGCGACTGATCTTGTGG  
ATGAACCATATGACCAGTACCCCTGTCTCTCGCAGTACGAAGGCTTCGA  
GCACTTTCTTATGTGCGCCGACGACAAGCAGTGGAAGCTTGGAAGAGGGC  
GGGCGGAGAAGGACGAGATGGTTGGCGCCCATTTTCATGCTGACCCCTCAG  
ATCCCCAATGAGCACCAGGACCTTCAGGACGTGGAGGAGCGCATAGACAC  
TTTTCAAGTCTTTGCAAAGAAAATGGACGACAGCGTGATGCAGCTTACGC  
ACGTGGCCTCAGAGCTGGTTTCGAAACACCTGGGCGGATTTCAGGAAGGAG  
TTCCAACGGTTAGGAAACTCCTTCCAGTCTATCAGCCAGGCTTTTCATGCT  
GGATCCACCGCACAGCTCCGAGACCTTAAACAACGCCTTTTCCCACNNNNNN  
NNNNNNNNNNNNNNNNNNNNNNNNNNNNNNNNNNNNNNNNNNNNNNNNNN  
NNNNNNNNNNGGTT  
TTATCATTTGGGGTGGCGTGGTTCGGAAACCTCCTGATTTCCATCCTACTG  
GTCAAAGACAAGAGCCTGCACCCGAGCGCCCTACTATTTCCCTGCTGGACCT  
GTGCGCCTCCGACATCCTGCGATCCGCCATCTGCTTTCCCTTTGTCTTCA  
CGTCGGTTAAAAACGGTTCCGGCCTGGACGTATGGTACACTGACCTGCAA  
GTGATCGCCTTCCTCGGGGTGCTATCCTGTTTCCACACGGCGTTTATGCT  
CTTCTGTGTTAGCGTTACCCGCTACCTGGCCATCGCACACCACCGCTTCT  
ACACCAAGAGGCTGACCTTCTGGACCTGCCTCGCCGTCATCTGCATGGTG  
TGGACGTTGTCGGTGGCTATGGCCTTTCGGCCGGTGCTAGATGTAGGGAC  
TTACTCTTTTTATCCGCGAGGAGGACCAGTGCACGTTCAGCACCCGCTCCT  
TCCGGGCGAACGATTTCTCTGGGCTTCATGCTCCTGCTGGCGCTCATCCTC  
TTGGCCACACAGCTGGTTTACCTCAAGCTCATCTTCTTCGTCACGACCG  
GCGGAAGATGAAGCCTGTCCAGTGTGTGCCTGCTGTTCAGCCAAAACCTGGA  
CCTTCCACGACCGGGGGCCAGCGGGCAGGCGGGCCAACTGGCTGGCT  
GGATTCGGTCGAGGCCCCACCCCGCTACTTTACTGGGAATCCGGCAGAA

CAGCAATGCAGCGGGCCGAGGGCTCTCCTGGTGTGGATGAATTCAAAA  
CAGAGAAGAGGATTAGTAGGATGTTCTACATTATGACGTTTTTTCTCCTG  
GCTCTCTGGGGGCCCTATCTGGTCGCCTGCTACTGGCGGGTGTGGCGAG  
GGGCCCGTGGTCCCTGGAGGCTACCTGACGGCAGCCGTGTGGATGAGCT  
TTGCNNNNNNNNNNNNNNNNNNNNNNNNNNNNNNNNNNNNNNNNNNNNNGCCAAATCTCGCTTTCACCC  
TGGCGTGGGGACTGGTCCTGGCATGG  
AGC---GCAGCGTCCCCTCGGCAACAGCTTGCTGTCCCCGAGCAAACC  
GACGAGTCCACTGTTGCCACCCCCCGCAGCGATGGTTTGTACCCC---C  
TGCCAACAACCGACTGGACTTTGCTGCCTCGGCATACGACGCCGCT----  
-----GATTTGCGCCGGTAACGCGGCCACCTTGCTGTCTACGCAGCGGCC  
GGAGTGAAGGCTC-----TTCCCCTGCCGACTGCAGGCTGCTCCAACCG  
GCCTCTTGGCTATTACGCAGACCCGTCGG---GCTGG---GGAGGACGCA  
CACCGCCGAGTACTGTGGTGTAACAGCAAATCCAGCTCGGTCTTTTCC  
TGCTGGCCCCGCTAACTCTATCGGTGGCAGAGCGGGCA---CT---AACTA  
CCTGG-----CCGAGGA---GGGA---GACTC---CATCACGACGG  
AGAGGTGCGCCG---CT---CGGCGGCTCGGACGAG---ACCAAACCCAAA  
GACATGAC---ATCCGA---GTCGAGCTGGATAGAG---ACGCCGTCCTC  
CATTAAGTCAATTGATTTCGAGCGATTCTGGTATCTTTG---AACAGGCCA  
AAAGGAGAAGAATCTCACCTTCTGCCACGCCA-----GTTTCAGAG  
ACAGTGTCCCCGTTAAAATCTGAG-----  
-----  
-----  
-----  
-----  
-----  
-----  
-----  
-----  
-----  
-----  
-----  
-----  
-----  
-----  
-----  
-----  
-----  
-----  
-----  
-----  
-----

>*Acanthurus nigricans*

AGCCTCCTAATCCGAGCAGAATTAAGCCAACCAGGCGCCCTCCTCGGGGA  
TGATCAAATTTATAATGTAATTGTTACAGCACACGCATTCGTAATAATTT  
TCTTTATAGTAATAACCAATTATGATTGGTGGATTGGAATTGATTAATT  
CCACTAATGATTGGAGCTCCTGACATAGCATTCCCACGAATAATAATAT  
GAGCTTTTGGCTCCTACCCCCATCCTTCCTGCTTCTACTAGCATCTTCTG  
CAGTAGAGTCTGGTGTGGCACAGGGTGAACAGTATACCCTCCTCTAGCC  
GGTAATTTAGCACATGCAGGAGCATCTGTAGACCTAACCATTTTCTCCCT  
CCACCTCGCAGGTATTTCTTCAATTCCTGGAGCTATTAATTTTATTACAA  
CAATTATTAATATGAAACCTCCTGCTATTTCTCAATATCAAACCCCTA  
TTTGTATGAGCCGTAATAACTGCTGTCTTCTACTCCTTCTCTCACTTCC  
CGTTCTCGCCGCCGGAATTACAATGCTACTAACAGACCCTAATCTAAACA  
CTACCTTCTTTGATCCGGCAGGGGGAGGAGACCCCATCCTATACCAACAT  
TTATTCTGATTTTTTTGGTC-----  
-----

-----  
-----  
-----TTCTAGAGAGAAAACCTTCATCCATCTAACTGCCTTGG  
CATGCTGTTACTGTCTGACGCCCACCAGTGCACCAAGCTCTCYGAGCTCT  
CCTGGGGCATGTGCCGTGAGCAACTTTCCAGCTATTTGCAAGACTGAGGAC  
TTCTCCAGCTACCCAAAGATATGGTAGTGCAGCTTTTGTACATGAGGA  
RCTAGAGACAGAAGATGAGAGGCTGGTTTATGAGGCTGCCCTCAACTGGA  
TCAACTATGACCTGGAAAAGAGGCACTGCCACCTTCCAGAGCTCCTGAGA  
ACAGTCCGCCTGGCTCTGCTGCCTGCCATCTTTCTCATGGAGAACGTTTC  
TACTGAAGAGTTGATCAACGCCCAGGCCAAGAGCAAAGAGCTGGTGGATG  
AAGCCATCCGTTGTAAGCTGAAGATCCTGCAGAATGATGGCGTCGTC AAC  
AGCCCGTGTGCTCGACCAAGAAAAACCAGCCATGCTCTCTTCTTCTGGG  
AGGGCAGACCTTTATGTGTGACAAGTTGTATCTGGTGGACCAGAAAAGCCA  
AAGAGATCATCCCCAAGGCCGACATTTCCAGTCCCAGGAAGGAGTTCAGC  
GCCTGCGCCATTGGCTGTAAGGTGTACATCACTGGTGGAA--GAGGCTC-  
AGAGAACGGTGTGTCCAAAGATGTATGGGTTTACGATACCGTCCACGAGG  
AATGGTGAAGGCTGCGCCCATGCTTATCGCTAGGTTTCGGCCATGGCTCT  
GCAGAGCTGAAACACTGTCTCTATGTGGTGGGAGGTCACACTGCTGCGAC  
TGGCTGTCTCCCGCCTCTCCCTCCGGACGAGTACATTTGTTGTGTTTAGT  
CGGTCTACAACAAGACTCATACTGAATGAAGCCGAGCTCATCATGGCACT  
CGCCAGGAGTTCCAGATGAGAGTGGTCACAGTTTCCCTGGAGGAACAGT  
CTTTTCCAGTATCGTCCAGGTGATCAGCAGTGCTACCATGTTAGTCAGT  
ATGCATGGAGCTCAGCTTATCACCTCGCTCTTCCCTCCCAGAGGAGCTGT  
TGTGGTGGAGCTGTTCCCCTTGTCTGTGAACCCAGAGCAGTACACCCAT  
ATAAAAACCTAGCTTCTCTTCCAGGTATTGACCTTCACTATATCTCCTGG  
AGAAAACCAAGGAGGAGAACACAGTCACTCACCCAGACAGACCTTGGGA  
ACAAGGCGGCATCACTCACTTGGAAAAGGAGGAGCAGGAGAGAATACTGG  
GGAGCAAAGATGTCCCTAGACACCTGTGCTGCCGCAACCCAGAGTGGCTC  
TTCAGGATCTACCAGGACACCTTGGTGGACATCCCCCTCCTTTCTGGAAGT  
TCTCAA---AGAGGGCATGAAG---ACAAAGCCAGCCTGAAGAA---GT  
CCAAACCGGCCAGCACTGTCCACCCGGGCGTGTCAGAGAACCCAGTGT  
CAGACTTCAGTACAAACAATAATGAGGCTAAACTCACAGTCTCCTGGCA  
GATTCCATGGAATCTGAAATACCTGAAGGTGAGAGGTTGAAATACGAGG  
TGTGGATCCAGAAAAAGACACCAGCAAGGGGACTCTGGAGGATCAAATC  
ATCCAGGCCAACCCTGCACTGGAGGCCTTCGGCAACGCCAAGACACTAAG  
AAACGACAACCTCGTCTCGCTTTGGAAAATTTATCAGAATTCACCTTGTA  
CGAGTGGSAAGCTGTCTGTCTGTGACATCGAGACGTACCTGTGGAGAAG  
TCACGTGTCACCTTTCAGCTCAAGGTGAGAGGAACCTATCACATTTTCTA  
CCAGATCCTGTCCAATCAGAAGCCAGAGCTGCTCGACATGCTGCTGATCA  
CCAACAACCCCTACGACTACTCCTACATCTCCCAAGGAGAGGTGACGGTC  
GCCTCCATCAACGACTCGGAGGAGCTGATGGCCACAGACAGCGCCTTCGA  
TGTGCTCGGCTTACCAGCAGATGAGAAGATGGGTGTGTACAAGCTGACGG  
GCGCCATCATGCACTACGGTAACATGAAGTTCAAACAGAAGCAGCGTGAG  
GAGCAGGCTGAGCCGGACGGGACGGAGGCTGCTGATAAATCAGCTTACCT  
GATGGGGCTGAACTCTGCCGACCTCATCAAAGGGCTTTGCCATCCCAGAG  
TCAAGGTGGGAAATGAATATGTCACCAAAGGCCAAAGTGTAGACCAAGTC  
TACTACCCCAACAAGGAGGCCTTCAAGTGTGAGGAGTGTGGAAAAATTA  
CAACACCAAGCTGGGATATAAGCGCCATGTGGCCATGCACTCTGCCACAG  
CGGGGGATCTCACCTGCAAAGTGTGCATGCAGACCTACGAGAGCACACCT  
GTGCTCTTGAGACCTCAAGAGCCACTCTGGGAAGTCTTCGGGTGGCAC  
CAAGGAGAAAAAGCACCCCTTGCACCCTGTGACCGTCTGTTTCTACACTC  
GTAAGGATGTGAGAAGGCACATGGTGGTCCACACGGGCGCAAAGGACTTC  
CTGTGCCAGTACTGTGCCAACGCTTTGGCAGGAAGGACCACCTGACACG

CCATGTGAAGAAAAGCCACTCACAAAGAGCTGCTGAAGATCAAGACGGAGC  
CCCCGATATGTTAGGTCTTTTAGCTTCTGGGTACCACCTTGTCTGTG  
AAGGAGGAGCTCAGCCCCATGATGTGCGGCATGGGTCCCAACAAAGACCC  
CATGATGGGCAAACCGTTCCCCAGTGGGGCCCCCTTCCCGATGGGTATGT  
ACAACCCCCACCAT-----CTCCAGGCCATGTCTAATTCTGGGGTGGGT  
CACCCA-----CACCCGTCCCTGATGCCAGTTCCTTGTCTGCAGCTAT  
GGGCATGGGCTGTCAATGGAATATCTCATCTACGCCTCTTTCTCATTCA  
TGGGATGTTTACAAAATTAGTGATGGATCAAATATCGTGAACCTGCTGGCA  
AGTAACTCTCCGAGTGTTCCTACGCTCTGACCCAGCAAAAATACTTTAG  
CAACTACAGTCCCGTGATTGGGTTTACATTTATGAGCCCATTGAGTACT  
GGAACTCCACGGTGCAGGAGCACCTGAAGACTCTAAGYCATGGCTTCAAC  
AAGATATCCTGGATGGACAACCTTTTCCACTACCTGCGGGTGGTGAATGT  
AAGTGCATCGACCAAGAGCGACTTCATCACCATCCTCAAAGGCTCCTTCT  
TGCGCAGCCCGGAGTACCAGCACTTCACTGAGGACATCATATTCTCCAAG  
G---ACCGTGAAACTG-----GTGAGTATGACATTATTGCCTCACGGAT  
GTACTTGGTGGCACGGACGACAGAGAAGAAGCGGAAGAGGTGGTGGAGC  
TTCTGGAAAAGCTGCGTCCATTGATGCTGATCAACAGCATCAAGTTCATT  
GCCTTCAATCCCACGTTTGTGTTTCATGGACCGTTACAGCTCCTCTGTCAT  
CTCGCCCATCCTGACCTCAGGATTCAGCGTACTCACAATCCTCATCCTTA  
CTTTCTTCTGTCATCAATCCCTTGGGTAACCTTCTGGCTCATCCTCACT  
GTCACATCTGTGGAGCTTGGCGTCCCTGGGTTTGGATGGGCTTTCACCAGTT  
TGAATGGCAGCCAGCTCTCAAGAATGTGTCTACATCTTGCAATGTTGGCA  
TTATTAATGGGCTCTCTGGAAGGGCTTCCTCAGTGGATGACTCCCCGGCT  
GACACCATCACTCGACGCTTTCGCTATGATGTGGCACTTGTGTCAGCATT  
AAAGGATATGGAGGAGGACATCATGGAGGGGCTGAGAGAGAGTGGGATGG  
AAGACAGTGCCTGCACCTCGGGCTTCAGTGTGATGATCAAAGAATCTTGT  
GATGGCATGGGCGATGTCAGCGAAAAGCACGGCGGAGGACCAGTTGTTCC  
TGAGAAGGCTGTACGTTTTTCTTTCACCATAATGTCTGTTTCTGTCCTGG  
CAGACGGTGAGGAG-----GAAGAG  
GTTACCATCTTACCCGAGCCAAAGCCAAACTCAGAGCTGTCTTGTAAGCC  
TCTTTGCCTGACATTTGTGGATGAGTCAGACCATGAGACACTCACAGCCA  
TCCTGTACCTATAGTTGCAGAGCGTGACGCAATGAAAGAAAGCAGGCTG  
ATCCTATCCATYGGTGGTCTATCTCGTGCCTTCCGCTTTCACCTCAGAGG  
CACKGGATACGAYGAGAAGATGGTACGTGAGATGGAGGGCCTCGAGGCTT  
CAGGGTCCCTCATATATCTGCACTCTTTGTGACTCTGGTCGGGCAGAGGCC  
TCTCAGAACATGGTGCTACACTCCATCACCCGCAGCCATGAAGAGAACCT  
CGAACGTTATGAAGTATGGAGAACCAACCCCTTTTCAGAATCTGTGGAAG  
AGCTCAGAGACAGAGTCAAAGGGGTCTCTGCCAAACCCCTTTTTGGAGACC  
CATCCTACGCTAGATGCATTACACTGTGACATTGGCAATGCCACTGAGTT  
CTACAAAATCTTCCAGGACGAGATCGGAGAGGTGTTCAAAATGC---CA  
AC---CCCAGCCGGGAGGAACGGCGCAGCTGGAGGGCAGCCCTCGATAAA  
CAGCTGAGGAAGAAGTTAAAGCTTAAACCGGTAATGAGGATGAATGGGAA  
CTATGCCCCCGGCTAATGACTCTTGAGACCGTAGAGGCCGTGTGCGAGC  
TGGTGGCCTCAGAAGAGAGGAGAGAGGCCCTGAGGGAGCTTGTGAGGCTC  
TACCTCCAGATGAAGCCTGTATGGCGTGCCACCTGCCAGCCAAGGAGTG  
CCCCGATCAGCTGTGCCGCTACAGCTTCAACTCTCAGCGCTTCGCCGAAC  
TCTTATCTTCTACCTACAAATATAGGTATAAGGGAAAGATACCCAATTAC  
CTGCACAAGACCCTGGCCCATGTCCCAGAAATCATAGAGAGAGATGGATC  
CATAGGAGCCTGGGCCAGCGAGGGGAACGAATCAGCAAACAAATCGTACA  
CCATTGATATGGGGCCCCCTGGGCCCCAGGTGGAAGGAGAATCCACAGCCT  
TTCTCCTGCTCCATTGAAGACCCCAAAAACAGACAAAGTTTAAAGGCAT  
CAAGACGTACATTTTCGTACCGSGTCACGCCGAGCCACACGGGGCATCCTG  
TCTACAGGCGCTACAAACACTTTGACTGGCTGTACAACCGCTTGCTGCAC

AAGTTCACTGTGATCTCAGTGCCTCACCTGCCTGAGAAGCAGGCCACTGG  
GCGATTTGAGGAAGACTTCATCGAGAAGCGCAAGAGGCGGCTGATACTGT  
GGATGAACCACATGACCAGTCAACCAGTCTCTCCAGTATGAAGGCTTC  
GAGCACTTYCTCATGTGTGCCGATGACAAGCAGTGGAACCTTGGCAAGAG  
ACGGGCGGAGAAGGACGAGATGGTGGGCGCCATTTTCATGCTCACCTCC  
AGATCCCCAATGAGCACCAGGACCTTCAGGATGTAGAGGAACGGATCGAC  
ACCTTCAAATCCTTYGCTAAGAAAAATGGATGACAGTGTGATGCAGCTCAC  
ACACGTCGCCTCGGAGCTGGTGCAGGAAACACCTGGGTGGGTTCAGGAAGG  
AGTTCCAGCGGCTGGGAAACGCCTTCCAGTCCATCAGCCAGGCGTTCATG  
CTGGACCCTCCTCACAGCTCAGAGGCCCTCAACAANNNNNNNNNNNNNNNNNNNNNNNNNGTTCTCAAAC  
TGAC

CTCTCTGGGTTTCATCATCGGAGTCGGTGTGGTTGGGAACCTCCTGATCT  
CCATCCTGCTGGTCAAAGACAAGAGTCTGCACCGAGCGCCCTACTACTTC  
CTGCTCGACCTGTGCGCCTCCGATATCCTGCGCTCTGCCATCTGCTTCCC  
CTTTGTCTTACCTCGGTCAAGAATGGATCTGCCTGGACGTACGGCACGC  
TGACCTGCAAAGTGATCGCCTTCTGGGTGTGCTTTCCTGTTTCCACACG  
GCGTTTATGCTGTTCTGTGTGTCAGCGTCACACGCTACCTGGCCATCGCACA  
TCACCGTTTCTACACCAAGAGGTTGACCTTCTGGACCTGTCTAGCTGTGA  
TCTGCATGGTGTGGACGTTGTGTCAGTGGCTATGGCGTTTCCGCCGGTGCTA  
GATGTAGGGACGTACTCTTTTATCCGAGAGGAGGACCAGTGCACATTCCA  
GCACCGCTCCTTCCAGGGCCAATGATTGCTGGGCTTCATGCTCCTGCTGG  
CRCTCATYCTCCTGGCCACACAGCTGGTTTACCTCAAGCTCATCTTCTTC  
GTCCACGACCGTCGAAAGATGAAGCCCGTCCAGTTCGTGCCTGCTGTGAG  
CCAGAACTGGACCTTCCATGGGCCAGGTGCCAGCGGGCAGGCGGCAGCCA  
ACTGGCTGGCCGGGTTTGGTTCGCGGCCACCCACCAACTTTGCTGGGC  
ATCCGGCAGAACAGCAACGCAGCGGGCCGAGGCGTCTACTGGTATTGGA  
TGAATTCAAACAGAGAAGAGGATTAGTAGGATGTTCTACATCATGACGT  
TTTTCTTCTTGCAGTGTGGGGCCCTATCTGGTCGCCTGCTACTGGCGA  
GTGTTTGCAAGGGGCCAGTGGTCCCTGGGGTTACCTGACAGCAGCCGT  
GTGGATGAGCTTTGCCAGGCTGGGGTCAATCCTTTCATCTGCATCTTCT  
CCAACCAGNNNGCCAAATCTCGCTTTCACCCTGGCATGGGGACTGGTCCTGGC  
ACGGAGC---GCAGCGTCCCCTCGGCAACAGCTTGCTATCCCCGCAGCA  
AAGCGAGGAGCCCCTGTTGCCACCCCGCAGCGATGGTTTGTACCC  
---CTGCCAACAACCGACTGGACTTTGCTGCCTCGGCATACGACGCCGCT  
-----GATTTGCGCCGGTAACGCGGCCACCTTGCTGTCTACGCAGC  
GGCCGGAGTGAAGGCTC-----TTCCCCTGCCGACTGCAGGCTGCTCCA  
ATCGGCCTCTTGGCTATTACGCAGACCCGTCAG---GCTGG---GGAGGA  
CGCACGCCCGCAGTACTGTGGTGTAAATAGCAAATCCAGCTCGGTGTT  
TTCTGCTGGCCCACTAACTCTATCGGWGGCAGGGCGGGCA---GC---A  
ATTACCTGG-----CGGAAGA---GGGA---GACCC---CATCCCG  
ACAGAGAGGTCACCG---AT---CGGCGGCTCGGAGGAG---ACCAAACC  
CAAAGACATGAC---ATCAGA---GTCGAACTGGATAGAG---ACGCCGT  
CCTCCATTAAGTCCATCGATTCAAGCGATTCTGGTATCTTTG---AACAG  
GCCAAAAGGAGAAGGATCTCACCGTCTGCAACGCCA-----GTTTC  
AGAGACTGTGTCCCCGTTAAATCTGAGCATCACTCAACAGGCGAAGTCA  
CAGAGAGAGAAGTGGCGTTGGGGATAAATCCGTTTCGCGGATGGGATGGGC  
GCCTTCAAATAAACCACAGCTCCCACGATATTGGTTCCGG---ACAAAC  
GGCTTTTCTCCTCCAGGCG---CCCGGCTAT---GCAGCAGCTGCCCTGG  
GA---CACCATCA-----CCACCCGACCCACGTTGGCTCT---TACTCC  
ACGGCGGCTTCAACTCCACCAGGGACTTTCTCTTCAGAAATCGGGGATT  
CGGGGACGCCACCAG-----CGCGCAGCACAGTTTGTTCGCCT  
C-----CGGAAGTTT---C-----GCAGGGCCACATGGACACTCA  
GATGCAGCGGGCACCTGCTCTTCCCGGGGCTCCATGAA---CAAGCGGC

GAGCCATGCGTCTTCCAACGTGGTCAACAGCCAGATGCGGGCTGGGCTTCT  
CGGGGGACATGTACGGACGGGCCGACCAGTATGGCCACGTTACGAGCCCC  
CGGT---CCGACCCTATGCTTCGACCCAGCTGCACGGCTATGGCCCCAT  
GAACATGAATATGGCCGCA---CACCACGGAGCAGGGCCCTTCTTTCGAT  
ACATGAGGCAGCCGATCAAGCAAGAGCTCATCTGCAAGTGGATCGAGCCG  
GAGCAGCTGACAAATCCCAAAAAGTCGTGCAACAAAACCTTTTAGCACGAT  
GCACGAGCTCGTGACCCATCTGACGGTGGAGCATGTTGGGGGACCGGAGC  
AGACCAACCACGTCTGCTTCTGGGAGGATTGCGCCAGAGAAGGAAAGCCA  
TTCAAAGCCAAATACAAACTTGTAAATCATATCAGAGTGCACACCGGAGA  
AAAGCCCTTTCCGTGTCGGTTCCCGGGCTGTGGCAA

>Acropoma japonica

AGCCTGCTAATTTCGAGCAGAACTGTGCCAGCCGGGCTCTCTTCTGGGAGA  
CGATCAAATCTATAATGTAATTGTTACAGCCCATGCCTTTGTGATAATCT  
TCTTTATAGTAATACCCATCATGATCGGAGGCTTCGGAAACTGGCTCATT  
CCCCAATAATTGCTGCCCCGACATAGCATTCCCTCGGATAAAATAATAT  
GAGCTTTTGACTCCTACCCCTTCCCTTCTCTTGCTCCTTGCCCTCCTCTG  
GAGTAGAAGCAGGAGCCGGCACCAGGATGAACAGTTTATCCCCCTCTCTCT  
AGCAACCTGGCCCACGCAGGAGCGTCCGTAGACCTCGCAATCTTCTCCCT  
CCACTTAGCAGGAATTTTCATCAATTTCTAGGGGCCATTAATTTTATTACAA  
CCATTATTAACATAAAAACCTCCTGCTATTTTACAGTACCAAACACCCCTC  
TTTGTGTGGTCCGTACTAATTACCGCGTACTCCTCCTTCTCTCCCTCCC  
CGTGCTTGCCGCAGGCATTACAATGCTTCTCACAGACCGAAACCTAAATA  
CCACCTTCTTTCGACCCTGCCGGCGGCGGAGACCCCATCCTCTATCAACAC  
CTC-----  
-----  
-----  
-----

-----NNNNNNNNNNNAACCTTACCCATCTAACTGCCTTGGCATGCTGTTGCT  
GTCTGATGCCACCAGTGCACCAAGCTGTGAGAGCTCTCCTGGGGCATGT  
GCCTCAGCAACTTTCCCGCTATTTGTAAGACGGAGACTTCCCTCCAACCTG  
CCCAAAGATATGGTGGTGCAGCTTTTGTACATGAGGAGCTAGAGACAGA  
AGATGAGAGACTGGTTTATGAAGCTGCCCTTAACTGGATCAACTATGACC  
TGGAAAAGAGGCACCTGCAACCTTCCAGAGCTCCTGAGAACGGTGCCTCTG  
GCCCTGCTGCCATCTTTCTCATGGAGAACGTTTCTACAGAAGAGCT  
GATCAACGCCACGGCCAAGAGCAAGGAGTTGGTGGATGAAGCTATCCGCT  
GTAAGCTGAAGATCCTGCAAAATGATGGCGTCGTAAACAGCCCGTGTGCT  
CGACCAAGAAAAACCAGCCATGCCCTTCTTCTTCTGGGAGGGCAGACTTT  
CATGTGTGACAAGTTGTACCTGGTGGACCAGAAAGCCAAAGAGATCATCC  
CCAAAGCTGACATTTCCAGCCCCAGGAAGGAGTTCAGCGCCTGCGCCATC  
GGCTGTAAGGTGTACATCACTGGTGGGA--GAGGCTC-AGAAAATGGTGT  
GTCCAAAGATGTGTGGGTCTACGACACCGTCCACGAGGAATGGTCAAGG  
CGGCGCCCATGCTCATTTGCCAGGTTTGGCCATGGCTCTGCGGAGCTGAAA  
CACTGCCTCTACGTGGTAGGAGNNNNNNNNNNNNNNNNNNNNNNNNNNNNNNNNNGGATGAG  
TACATTGTTGTGTTTCAGTCGT  
TCAACGACGAGGCTGATATTGAATGAAGCTGAGCTAATCATGGTGTGCTGGC  
CCAGGAGTTCAGATGAGAGTGATCACGGTATCCCTGGAGGAACAGTCTT  
TCCCCAGTATCGTCCAGGTGATCAGCGGTGCTTCCATGTTAGTCAGTATG  
CATGGAGCTCAGCTTATCACCTCACTCTTCTTCCCCAGAGGAGCTGCTGT  
GGTGGAGCTGTTCCCCCTTTGCTGTGAACCCAGAGCAGTACACCCCGTATA  
AAACTCTTGCCCTCCCTTCCAGGCATGGACCTTCACTATGTCTCTGAGG  
AACGCTAAGGAGGAGAACACTATCACCCACCCAGACAGACCCTGGGAGCA  
AGGGGGCATTGCTCACTTGGAGAAGGAGGAGCAAGAGCGAATACTGGCGA  
GCAAAGATGTCCCCAGGCACCTGTGCTGCCGCAACCCAGAATGGCTCTTC



CGGATCTACCAGGACACATTGGTCGACATCCCTTCCTTCCTGGAAGTCCT  
CAA---AGAGGGCATGAAG---ACAAAGCCCAGCTTGAAGAA---GTCAA  
AGCCGGCCAGCACAGTCCACCCGGGCCGGGTGAGAGAACCTCAGTGTCAG  
ACCTCAGTACAAACACTAATGAGGCTAAACTCACAGTCTCCTGGCAGAT  
CCCGTGGAATCTGAAATTCCTAAAGGTGAGAGAGGTCAAATATGAAGTG-  
-----AAGAAAGACACCAGTAAGGGGACATTGGAGGATCAAATCATC  
CAGGCGAACCCTGCGCTGGAGGCCCTTCGGCAATGCCAAAACATTGAGAAA  
TGACAACTCGTCTCGTTTTGGAAAAATTCATCAGAAATCACTTTGGTACGA  
GCGGCAAGCTGTCTGCTGACATCGAGACGTACCTGCTGGAGAAGTCA  
CGTGTACCTTTTTCAGCTCAAAGCTGAGAGGAACTACCACATCTTCTACCA  
GATTCTGTCCAATCAGAAGCCAGAGCTCCTGGACATGCTGTTGATCACCA  
ACAACCCGTATGACTACTCCTACATCTCCCAAGGAGAGCTAACGGTTGCT  
TCCATCAATGACTCAGAGGAGCTGATGGCCACTGACAGCGCCTTCGATGT  
GCTCGGCTTCACTACAGACGAGAAGATGGGCGTCTATAAACTGACTGGCG  
CCATCATGCACTACGGCAACATGAAGTTCAAACAGAAGCAGCGTGAGGAG  
CAGGCAGAGCCGGATGGGACAGAGGCTGCTGATAAATCAGCTTACCTAAT  
GGGGCTGAACTCTGCTGACCTCATCAAAGGGCTGTGCCATCCAGAGTCA  
AGGTAGGAAATGAATACGTCACCAAAGGCCAAAGTGTGGACCAAGTCTAC  
TACCCCAACAAGGAGGCCCTTCAAGTGTGAGGAGTGTGGGAAGCACTACAA  
CACCAAGCTGGGATATAAGCGCCATGTGGCCATGCACTCTGCCACAGCAG  
GGGATCTCACCTGTAAAGTGTGCATGCAGACCTACGAGAGCACACCTGTG  
CTCTTGAGACCTCAAGAGCCACTCTGGGAAGTCTTCGGGTGGCACCAA  
GGAGAAAAAACACCCGTGCGATCACTGTGACCGTCGTTTTCTACACACGGA  
AGGATGTGAGACGGCACATGGTGGTCCACACGGGCCGAAAGGACTTCCTG  
TGCCAGTACTGTGCCAGCGCTTCGGCAGGAAGGACCACCTGACGCGCCA  
TGTGAAGAAGAGCCACTCTCAGGAGCTGCTGAAGATCAAGACAGAGCCTC  
CTGATATGTTAGGTCTTTTTAGCGTCGGGGTACCACCCTGCTCTGTGAAG  
GAGGAGCTCAGCCCCATGATGTGTGGCATGGGACCCAACAAGACCCCAT  
GATGGGCAAACCGTTCCCCAGTGGGGCCCCCTTCCCGATGGGCATGTACA  
ACCCCCACCAT-----CTCCAGGCCATGTCTAATTCTGGGGTGGGTCAC  
CCA-----CACCCGTCCCTAATGCCTAGTTCCTTGTCTGCAGCTATGGG  
CATGGGCTGTACATGGAATATCTCATCTACGCCTCTTTCTCATTCATGG  
GATGTTTACAAATCAGTGATGGCTCAAATATCGTTAACCTGCTGGCTAGT  
AACTCTCCGAGTGTTCGTATGCTCTGACCCAGCAGAAATACTTCAGTAA  
CTACAGTCTGTAAATGGGTTTTACATTTATGAGCCCATAGAGTACTGGA  
ACTCAACGGTGCAGGAGCACCTGAAGACTCTGAGTCATGGCTTCAACAAG  
ATCTCTGGATGGACAACCTTTTTCCACTACCTGCGGGTGGTGAATGTGAG  
TGCATCAACCAAGAGCGACTTCATCACCATCCTCAAGGGCTCCTTCCTGC  
GCAGCCCGGAGTACCAGCACTTCACTGAGGACATCATATTCTCCAAGA--  
-ACCGCGAGACTG-----ATGAGTACGACATTATCGCCTCACGGATGTA  
CTTGGTGGCACGGACGACAGAGAAGAAGCGTGAAGAGGTGGTAGAGCTTC  
TGGAGAAGCTTCGTCCGTTGATGCTGATCAACAGCATCAAGTTCATTGCC  
TTCAATCCTACATTTGTCTTCATGGACCGCTACAGCTCCTCTGTCTATCTC  
GCCATCCTGACCTCAGGCTTACAGGTAATCACAATCCTCATCTCACTT  
TCTTCTGGTCATAAACCCTTGGGGAACCTTCTGGCTCATCTCACTGTA  
ACGTCCGTGGAGCTGGGCGTCTTGGGTTTGATGGGCTTTCACCAGTTTGA  
ATGGCAGCCAGCTCTCAGGAATGTGTCTACATCTTGCAATGTTGGCATT  
TTAATGGGCTCTCTGGATGGGCTTCCTCGGTGGATGATTCCCCAGCTGAC  
ACCATCACTCGACGGTTTCGCTATGATGTCGCGCTGGCATCAGCAATAAA  
GGATCTGGAGGAGGACATAATGGAGGGACTGAGAGAGAGTGGGATGGAAG  
ACAGTGTGTGCACCTCAGGCTTCAGTGTGATGATCAAGGAATCCTGTGAT  
GGCATGGGCGATGTCAGCGAGAAGCACGGTGGAGGACCAGTTGTTCTTGA  
GAAGGCTGTACGTTTCTCTTTCACTATTATGTCTGTCTCGGCTTGGCAG

ACGATGAGGGG-----AAAGAGGTT  
ACCATCTTCACCGAGCCAAAGCCAAACTCAGAACTGTCCTGTAAGCCTCT  
TTGCCTGACGTTTGTGGATGAGTCAGACCATGAGACACTCACAGCCATCC  
TAGGGCCTATAGTTGCAGAGCGTACTGCGATGAAAGAAAGTAGGCTCATC  
CTATCCATGGGTGGACTACCTCGTTCCTTTTCGCTTTCACCTCAGAGGCAC  
AGGATACGATGAGAAGATGGTACGTGAGATGGAGGGCCTCGAGGCCCTCAG  
GGTCTCCTATATCTGCACGCTTGTGACTCCAGTCGGACAGAAGCCTCT  
CAAAACATGGTGCTACTCCGTCACCTCGGAGTCATGACGAGAACCCTAGA  
ACGTTATGAAATATGGAGAACCAACCCCTTTTCTGAGTCTGTAGATGAGC  
TGAGAGACAGAGTCAAAGGGGTATCTGCCAAGCCTTTCATGGAGACCCAT  
CCCACGCTGGATGCATTACACTGTGACATTGGCAATGCCACTGAGTTCTA  
CAAAATCTTCCAGGACGAGATCGGAGAGGTGTACCAAAGGT---CAAC-  
--CCAGCCGGGAGGAACGGCGCAGCTGGAGGGCAGCCCTAGATAAACAG  
CTGAGGAAGAAGATAAAGCTTAAACC GGTAATGAGGATGAATGGGAAC TA  
TGCACGCAGGCTAATGACCCAGGAGGCTGTGGATGTGGTGTGTGAGCTGG  
TGCCCTCAGAAGGGAGGAGGGAGGCCCTGAGGGAGCTTATGAGGCTCTAC  
CTCCAGATGAAGCCTGTGTGGCGCGCCACCTGCCCAGCCAAGGAGTGCCC  
CGACCAGCTGTGCCGCTACAGCTTTAACTCCCAGCGCTTTTGCCGACCTCC  
TCTCCTCTACCTTCAAATATAGGTACAATGGAAAAGATAACCAATTACCTG  
CACAAGACCCTGGCCCATGTGCCTGAAATCATAGAGAGAGATGGATCCAT  
AGGAGCCTGGGCCAGCGAGGGGAACGAGTCGGCAAACAAATCGTACACCA  
TCGAGATGTGCCCTTGGGGCCGGGTGGAAGGAGAGCCACAGCCTTTC  
TCCTGCTCCATTGAAGACCCACGAAACAGACAAAAGTTCAAGGGCATCAA  
GACATACATTTTCGTACCGGGTCACGCCGAGCCACACAGGGCGTCCCCTCT  
ACAGGCGCTACAAACACTTTGACTGGCTGTACAACCGCTTACTGCACAAG  
TTCACTGTGATCTCCGTGCCGCACCTGCCTGAGAAGCAGGCCACGGGGCG  
ATTTGAGGAAGACTTCATCGAGAAGCGTAAGAGGCGACTGATACTGTGGA  
TGAACCACATGACCAGTCACCCAGTCCTCTCCCAGTATGAAGGCTTTGAG  
CACTTCTGATGTGCGCTGACGACAAGCAGTGGAAACTGGGCAAGAGACG  
GGCGGAGAAGGACGAGATGGTGGGCGCCATTTTCATGCTGACCCCTCAGA  
TCCCTAACGAGCACCAGGACCTTCAGGACGTAGAGGAACGGATCGACTCC  
TTCAAGTCCTTTGCTAAGAAAATGGATGACAGCGTGATGCAGCTCACGCA  
TGTTGCCTCAGAGCTGGTGCCTAAGCACCTGGGTGGATTTCAGGAAGGAGT  
TCCAGCGGCTGGGAAATGCCTTCCAGTCTATCAGCCAGGCGTTTCATGCTG  
GACCTCCGCACAGCTCAGAGACCTTCAACAACGCCATCTCCCATCCTCT  
CACCACGTTCTCAAAC TGACCTCTCTGGGTTTCATCATTGGAGTCGGTG  
TGTTGGAACCTCCTGATCTCCATCCTGCTGGTCAAAGACAAGAGCCTG  
CACCGGGCGCCCTACTATTTCTGCTGGACCTGTGCGCCTCTGATATCCT  
GCGCTCCGCCATCTGCTTCCCCTTTGTTTTACCTCGGTCAAGAATGGAT  
CTATCTGGACCTATGGCACGCTGACCTGCAAAGTGATCGCCTTCTTGGGG  
GTGCTCTCCTGTTTCCACACGGCGTTTATGCTGTTCTGTGTGTCAGCGTAC  
GCGCTACCTGGCCATCGCACATCACCGTTTCTACACCAAGAGGCTGACCT  
TCTGGACCTGTCTAGCTGTATSTGCATGGTGTGGACGTTGTGTCAGTGGCT  
ATGGCGTTCCC GCCGTGTTAGACGTAGGGACGTA CTCTTTTATCCAGGA  
GGAGGACCAGTGCACCTTCCAGCACCGTTCCCTTCAGGGCGAATGATTCGC  
TGGGCTTCATGCTCCTGCTGGCGCTCATCCTCCTGGCCACACAGCTGGTT  
TACCTCAAGCTCATCTTCTTCGTCCACGACCGTCAAAGATGAAGCCTGT  
CCAGTTCGTGCCTGCTGTGTCAGCCAGA ACTGGACCTTCCACGGGCCAGGCG  
CCAGCGGGCAGGCGGGCCAACTGGTTGGCCGGATTTGGTTCGAGGTCCC  
ACCCCGCCTACTTTGCTGGGCATCCGGCAGAACAGCAACGCAGCGGGCCG  
CAGGCGTCTACTGGTATTGGATGAATTCAAAACAGAGAAGAGGATTAGTA  
GGATGTTCTACATCATGACGTTTTTCTTCTGGCACTGTGGGGGCCCTAT  
CTGGTCGCCTGCTACTGGCGGGTGTGCAAGGGGCCCTTTGGTCCCTGG





-----  
-----  
-----  
-----TATCTCATTTACGCTTCCTTTTCGTTTCAT  
GGGATGTTTACAAATCAGTGACGGTTCAAATATTGTAAACCTCTTGGCGA  
GCAATTCGCCAAGTGTTTCATACGCTCTGACCCAGCAGAAATACTTTAGC  
AACTACAGTCCCGTCATTGGCTTTTACATTTACGAACCCATCGAGTACTG  
GAACTCCACGGTGCAGGAGCACCTGAAGACTTTGAGTCACGGCTTCAACA  
AGATCTCCTGGATGGACAACCTTCTTCCACTACCTGCGGGTGGTGAACGTG  
AGTGCATCGACCAAGGGTGACTTCATCTCCAACCTCAAAGGCTCCTTCCT  
GCGGAGCCCTGAGTACCAGCACTTCACAGAGGACATAATATTCACCAAGA  
---ACGCGAGACAG-----ATGAATACGACATTATCGCCTCACGGATG  
TACCTGGTGGCACGGACCACAGAGAAGAAGCGTGAGGAGGTGGTGGAGCT  
TCTCGAGAAGCTTCGCCCTCTGATGCTGATCAACAGCATCAAGTTCATTG  
CCTTCAATCCCACCTTTTGTGTTTCATGGACCGCTACAGCTCCTCCGTTATC  
TCACCCATCCTGACCTCAGGCTTCAGCGTGCTCACCATACTTATTTCTCAC  
TTTCTTCTGGTTCATCAACCCCTTGGGGAACTTCTGGCTCATCCTCACGG  
TCACATCCGTGGAGCTAGGAGTCTTGGGTTTGGATGGGTTTTTACCATTTT  
GAATGGCAGCCAGCGCTAAAAAATGTTTCCGCATCTTCAAATGTAGGCAT  
TATGAATGGGCTCTCTGGATGGGTGTCTTCACTGGACGACTCACCAGGTG  
ATACCATCACCCGGCGATTTTCGCTATGATGTGGCTCTCGTGTGACACTA  
AAGGATCTGGAAGAGGACATCGTGGAGGGCTGAGAGAGAACAGGATGGA  
AGACAGTGCTTGCACCTCAGGCTTCAGTGTGATGATCAAAGAATCTTGTG  
ATGGTATGGGTGATGTTAGTGAAAAGCATGGTGGAGGGCCAGCTGTCCCA  
GAGAAGGCTGTGCGTTTCTCTTTCACTCTTATGTCCATCTCTGTCTGCC  
AGATGGTGACACT-----GAGGCTG  
TAACCATCTTTACTGAGCCAAAGCCAAACTCGGAACTGTCTGCAAGCCC  
CTTTGTCTCATGTTTGTGATGAATCAGACCATGAGACACTCACAGCTGT  
CCTGGGGCCTATAGTTGCAGAACGAAATGCAATGAAGGAAAGCAGACTCA  
TCCTATCCATCGGTGGCCTACTTCGCTCCTTCCGATTCCACTTCAGGGGT  
ACAGGATATGATGAGAAGATGGTGCCTGAAATGGAGGGTCTGGAGGCCTC  
GGGGTCCACCTATATCTGCACTCTGTGTGACACCAGTCGTGCTGAGGCCT  
CTGAAAACATGGTACTACACTCTATTACACGTAGCCATGATGAGAACCTA  
GAACGTTATGAAATATGGAGAACAAATCCCTTTTCTGAGCCTATAGACGA  
GCTGCGGGACAGAGTGAAAGGAGTTTCTGCCAAGCCATTCCTGGAGACTC  
AGTCCACACTAGATGCATTACACTGTGACATTGGCAATGCCACTGAGTTC  
TACAAAATTTTCCAGGATGAAATTGGTGAAGTGCACCAAAGGT---CAA  
T---CCAGCCGCGAAGAACGGCGCAGCTGGAGGGCTGCCCTTGATAAAG  
AGTTAAGGAGGAAGCTGAAGCTTAAACCAGTRATGAGGATGAATGGTAAC  
TATGCCCGCAAGCTAATGACACTAGAGGCTGTGGAGGTGGTGTGTGAGCT  
GGTGCCCTCGGAGGAGAGGAGGGAGGCCTTGAGGGAGCTTATGAGGCTCT  
ACCTCCAGATGAAGCCCCTGTGGCGCACCACTGCCAGCCAAGGAGTGC  
CCTGACCAGCTGTGCCGCTACAGCTTTAACTCCAACGCTTTGCTGACCT  
CCTCTCCTCTACCTTCAAATATAGGTACAATGGAAAGATAACCAATTACC  
TGCACAAGACCCTTGCCCATGTCCCTGAAATCATAGAGAGAGATGGATCT  
ATCGGTGCCTGGGCTAGTGAGGGAAATGAGTCGGCAAACAAGTCATACAC  
CATCGAGATGGGCCCTGTGGGGCCCCGTGGAAAGAGAGCCCACAGCCTT  
TCTCATGCTCCATTGAAGACCCTACCAAACAGACAAAGTTTAAAGGCATC  
AAAACCTACATCTCATACCGTGTACACCGAGCCACACAGGTTCATCCTGT  
ATACAGGCGCTACAAACACTTTGACTGGCTGTACAACCGCCTTCTGCACA  
AGTTCACTGTGATCTCTGTGCCTCACCTGCCTGAGAAGCAGGCCACGGGG  
CGATTTGAGGAAGACTTTATTGAGAAGCGCAAGAGACGACTGATACTGTG  
GATGAACCACATGACCAGTCACCCAGTTCTTTCCCAATATGAGGGCTTTG

AGCACTTTCTGATGTGTGCGGATGACAAGCAGTGGAAGACTGGGTAAGAGA  
CGAGCTGAGAAGGATGAGATGGTGGGTGCCACTTCATGCTGACCTCCA  
GATCCCTCAAGAGCACCAGGATCTTCAGGATGTAGAGGAGAGAGTTGACT  
CCTTTAAGGCCTTTGCAAAGAAAATGGATGACAGTGTTCATGCAGCTCACT  
CACGTTGCCTCAGAGCTGGTCCGCAAGCACCTGGGTGGATTTCAGGAAGGA  
ATTCCAGAGACTGGGAAATTTCTTCCAGTCCATCAGCCAGTCATTTATGC  
TGGATCCTCCCCACAGCTCAGAGGCCCTCAACAAGCCNNNNNNNNNNNNNNNNNNNNNNNNNNNNCGTTCCTCAA  
GACCTCTCTGGGTTTTATCATTGGAGTYGGTGTGGTGGGAACCTCCTGA  
TCTCCATCCTGCTGGTCAAAGACAAGAGCCTGCACCGAGCACCCTACTAT  
TTCTGCTGGACCTGTGCGCCTCCGACATCCTGCGCTCAGCCATCTGCTT  
CCCTTTCGTCTTACCTCCGTCAAAGATGGCTCTGCTTGGACTTACGGCA  
CGCTGACCTGCAAAGTGATCGCCTTCCCTGGGGGTGTTGTCCTGTTCCAC  
ACGGCGTTCATGCTCTTCTGCGTCAGCGTCACCCGCTAYTTGGCCATCGC  
ACATCACCCTTTCTACACCAAGCGGCTCACCTTCTGGACCTGCCTGGCCG  
TCATCTGCATGGTGTGGACTCTGTGGTGGCTATGGCGTTCCCGCCGGTG  
TTGGATGTCGGGACGTATTCTTTTATTCAGGAGGAGACCAGTGCACGTT  
CCAGCACCGTTCCCTCAGGGCGAATGATTCACTGGGCCTTCATGCTGCTGC  
TGGCGCTCATCCTCCTGGCCACACAGCTGGTTTTACCTCAAGCTCATCTTC  
TTTTGTCACGACCCCGAAAGATGAAGCCCGTCCAGTTCGTGCCTGCTGT  
CAGCCAGAAGTGGACATTCACCGGCCCGGGGCCAGCGGCAGGCAGCGG  
CAAAGTGGTTAGCTGGATTTGGTAGAGGCCCCACGCCCGACTCTGCTG  
GGCATCCGGCAGAAGCAAGCAAGCAGCGGGCCGACGGCCTGCTGGTGT  
GGATGAGTTCAAAACAGAGAAGAGGATTAGTAGGATGTTCTACATCATGA  
CGTTTTCTTCCCTGGCGCTGTGGGGGCCCTATCTGGTGGCCTGCTACTGG  
CGGGTGTTCGAGGGGGCCCCGTGGTCCCTGCGGGCTACCTTACGGCGGC  
CGTGTGGATGAGCTTTGCCCAGGCTGGGGTCAATCCTTTTCATCTGCNNNNNNNNNNNNNNNNNNNNNNNNNNNN-----

-----  
-----  
-----  
-----  
-----  
-----  
-----  
-----  
-----  
-----  
-----  
-----  
-----

-----NNNNNNNNNNNNNNNGCGAAGTCACAGAGAGAGAAGTGGCGCTGGGGAT  
AAATCCGTTTGCAGATGGGATGGGCGCTTTCAAATCAACCACAGCTCCC  
ACGACCTGGGCTCCGG---ACAGACGGCGTTCTCCTCCCAGGCG---CCC  
GGCTAC---GCAGCAGCCGCTTAGGACACCACCACA-----CCACCC  
GACCCAGTGGCTCT---TACTCCAGGCGGCTTTCAACTCCACCAGGG  
ACTTCTGTTCAGAAATCGGGGTTCGGGGACGCCACCGG-----  
---CGCTCAGCACAGCTTGTGCTC-----CGGAAGTTT---C---  
----GCAGGGCCACACGGACACTCGGAGGCGGGGGCACCTGCTCTTCC  
CGGGGCTCCAGAA---CAGGCGGCGAGTCATGCGTCCAACGTGGTC  
AACAGCCAGATGCGTCTGGGCTTCTCGGGGACATGTACGGACGGCCCCGA  
CCAGTACGGCCAGTCACGAGCCCACGGT---CCGA---CTATGCTTCGA  
CTCAGCTGCACGGCTACGGCCCCATGAACATGAATATGGCCGCG---CAC  
CACGGAGCGGGGCCCTTCTTTCGGTACATGCGGCAGCCGATCAAGCAAGA



--AAGAAGGATACCAGCAAGGGAACGCTGGAGGATCAAATCATCCAAGCT  
AACCCAGCTTTAGAGGCTTTTGGCAATGCCAAAACGTGAGGAACGACAA  
CTCCTCACGTTTCGGGAAATTCATCCGCATTCATTTTGGAGTAAGTGGCA  
AACTGTCCTCTGCTGACATTGAAACGTACCTGCTTGAGAAATCTCGTGTC  
ACTTTTCAGCTCAAAGCTGAGAGGAACTACCACATCTTTTTCCAGATTTT  
GTCCAACAAAAGCCAGAACTACTGGACATGCTGTTGATCACTAACAACC  
CATATGATTATGCATATGTCTCCCAAGGAGAGGTGTCGGTTGCTTCAATT  
GATGACTCAGAGGAACTGATTGCAACCGACAGTGCCTTTGATGTGTGGG  
CTTCACAGCAGRTGAGAAGATGGGTGTTTACAAGTTGACAGGCGCCATCA  
TGCACTACGGCAATATGAAGTTCAAGCAGAAGCAGCGCGAGGAGCAGGCA  
GAGCCTGACGGCACCGAGTCAGCTGACAAATCAGCCTACCTAATGGGGCT  
CAACTCGGCTGACCTCCTTAAGGGACTATGCCATCCAAGGGTTAAAGTCG  
GCAATGAATATGTCACTAAAGGCCAAAATGTAGATCAAGTCTACTAC---

-----TACCTAATTTATGCATCTTTTTCTTCATGGGATGTT  
TACAAATCAGTGATGGATCTAATATTTGTCAACCTCTTAGCCAGCAACTCC  
CCAAGCGTCTCCTATGCTCTGACACAGCAGAAATATTTTCAGCAATTACAG  
TCCGGTGATTGGATTCTACATATATGAACCTATAGAGTACTGGAATTCCA  
CAGTTCAAGAACACCTGAAGACCTGGGCAATGGATTCAACAAGATTTCA  
TGGATCGACAACCTCTTTTCAGTATCTGAAGGTAGTGAATGTCAGTGCCTC  
AACCAAAAGTGAATTCATAACCATCTGCAGACTTCCTTCTTGAGGAGCC  
CAGAGTACCAGCACTCAAAGATGACATCATTTCATAAAA---TGAGG  
G-----ATGAAACTGAGATCATTGCATCCCGGATGTACTTGGT  
GGCCAGAACCACAGAGAAGACGAGGGAGGAGGTGGTGGAACTACTGGAGA  
GACTGAGACCTCTGTCCCTCATCAACAGCATAAAAATTCATAGTCTTCAAC  
CCCACATTTGTGTTTCATGGATCGATACAGCTCCTCTGTTCATTTCTCCAAT  
CCTGACCTCTGGATTCAGCGTCTGATTGTCTTGATCCTGACATTCCTTC  
TGGTCATCAACCCCTCGGAAACTTCTGGTTGATTCTGACTGTCACCTCA  
GTGGAGCTGGGAGTTCTTGGCCTAATG-----

-----AGCGAGAAGCATGGGGGTGGTCCAGCCCTCCAGAGAAGGC  
AGTGAGGTTCTCCTTCACCGTGATGTCGGTGTCTGTCAGGCCTGAGGGGG  
GTGAA-----GGGGAAGTGACTCTC  
TTCTGCGAACC CAAGCCAAACTCAGAGCTCAGCTGCAAGCCGCTGTGCCT  
GATGTTTGTGGATGAGTCTGACCACGAGACGCTGACTGCCATTTTGGGGC  
CTGTAGTGGCTGAACGCAACGCCATGAAAGAAAGCAGGCTCATTCTGTCT  
GTCGGTGGCCTGCTGCGATCTTTCCGCTTCCACTTCCGGGGCACGGGGTA





--GCCGCTGATTTTGGCTGGAAACGCGGCCACCTTGCTGTCATACGCAGCG  
GCGGGAGTGAAGGCAT-----TACCGTTGCCTACAGCAGGGTGCTCGAG  
CAGACCTCTGGGTTACTATGCAGACTCTTCGG---GATGG---AGCACAC  
GGACTCCTTCCCAGTATTGC-----AGCAAACCTAGCTCTGTTCTT  
TCCTGCTGGCCCTCCAATTCTTCTGGGAACAGGACTGGCA---CCTCTAC  
CTATCCTG-----CGGATGA---GAGT---GATAC---TATCCCAA  
ATGAGAGGTCACCC---CT---CGGTGGGTCTGAGGAT---GTAAAACCT  
AAAGACTT-----GTCGGA---ATCCAACCTGGATAGAA---ACGCCATC  
GTCCATAAAATCGATTGATTCAAGCGATTCTGGGATTTTTG---AGCAGG  
CCAAACGGAGACGTATGTCTCCCTCCGCAACGCCG-----GTTTCT  
GAAACTACCTCCCCATCTAAGAGCGAA-----ACCGGAGAAGTCAC  
AGACAGAGAAGTGGCTTTGGGGATAAATCCCTTTGCTGATGGGATGGGCG  
CTTTTAAAATCAACCACAGCACCCACGACCTGGGCTCTGG---ACAAACG  
GCATTTTCTTCGCAAGCA---CCAGGCTAC-----GCCGCTGCCCTGGG  
A---CACCATCA-----CCACCCACTCATGTCAGCTCC---TATTCCA  
CCGCGGCTTTCAATTCCACTCGGGACTTTTCTGTTTCGAAACCGGGGCTTT  
GGAGACGCGACGAG-----TGCACAGCACAGCCTGTTTCGCCTC  
CGC---AGCAGGAAGTTT---T-----GCAGGGCCACATGGACACTCGG  
ATGCCACCGGGCACCTGCTTTTTCCGGGACTTTCATGAG---CAAGCGGCT  
ACTCACGCGTCTTCCAATGTTGTAAATAGTCAGATGCGTCTGGGCTTTTC  
GGGGACATGTACGGTCGAGCCGAGCAGTATGGCCATGTAACCAGCCCCA  
GGT---CTGATCATTACGCTTTCGACCCAGTTGCACGGATATGGCCCTATG  
AACATGAACATGGCTGCA---CACCATGGGGCTGGGGCCTTCTTTCGGTA  
CATGAGGCAACCGATCAAGCAGGAACCTTATCTGCAAATGGATCGAACCGG  
AACAGTTGACAAACCCGAAAAAGTCCCTGCAACAAAACCTTTCAGTACCATG  
CACGAGCTCGTTACACACCTCACAGTGGAAACATGTCGGAGGACCAGAACA  
ATCGAATCATATCTGCTTTTTGGGAAGAGTGTCCGAGGGAAGGGAAACCTT  
TCAAAGCAAAGTACAAACTTGTAAATCACATTAGAGTACACACCCGCGAA  
AAACCTTCCCATGTCCGTTTTCCCGCTGTGGGAAA

>Aldrovandia affinis

AGCCTTTTAAATTCGGGCAGAACTAAGCCAACCCGGAGCCCTTTTAGGAGA  
TGACCAAATTTATAATGTTATCGTTACAGCACACGCTTTCGTAATGATCT  
TCTTTATGGTTATAACCCGTAATAATTGGAGGCTTCGAAACTGACTCGTT  
CCCCAATGATCGGCGCCCCGACATAGCATTCCCGCGAATAAAACAACAT  
AAGCTTCTGACTCCTACCCCGTCATTTCTCCTTCTACTCTCTTCTCTG  
GGGTTGAGGCAGGGGCAGGAACAGGCTGAACAGTATACCCCCACTTGCT  
AGCAACCTAGCACATGCCGGGGCATCCGTCGACCTAACCATCTTCTCCCT  
ACACCTTGCAGGTATCTCATCAATCTTGGGGCTATTAACCTTCATTACCA  
CAATCATTAACATGAAACCCCGCAATCTCACAATATCAAACACCCCTA  
TTTGTATGATCAGTACTTGTCACTGCAGTCTTGCTACTCCTATCTCTACC  
AGTCCTAGCCGCAGGCATTACCATGCTACTTACGGATCGAAATCTTAATA  
CAACATTCCTTTGACCCGGCAGGAGGGGAGACCCAATTCTGTACCAACAT  
CTGTCTGATTCTTCGGCCACCCCGAGGTGTATATCCTAATCCTCCCTGG  
GTTTCGGAATAATCTCGCACATCGTCGCATATTATGCCGGCAAAAAGAAC  
CGTTTGGCTACATAGGAATAGTGTGAGCTATAATGGCCATCGGCCTTCTA  
GGGTTCAATGTCTGAGCACACCACATATTTACAGTAGGCATAGATGTAGA  
CACACGAGNNNN-----

-----  
-----  
-----  
-----  
-----  
-----

-----  
-----  
-----  
-----  
-----  
-----  
-----  
-----  
-----  
-----  
-----  
-----  
-----  
-----  
-----  
-----  
-----  
-----  
-----  
-----  
-----  
-----  
-----  
-----  
-----  
-----

-----  
-----AAGAAGGATACCAGCAAGGGCACACTCGAGGATCAAATCATCC  
AGGCTAACCCAGCGCTGGAAGCTTTTGGCAATGCTAAGACTGCGAGGAAC  
GACAACCTCTCGCGTTTTGGGAAATTTCATCCGCATTCATTTTGGAGTAAG  
TGGCAAGCTTTCGTCGCTGACATCGAAACTTACCTGCTTGAGAAATCTC  
GCGTCACTTTCAGCTCAAAGCCGAGAGGAAGTATCACATCTTTTACCAG  
ATTATGTCCAACAAAAAGCCTGAATTGYTGGACATGATGTTGATCACTAA  
CAACCCATACGATTATGCTTACGTCTCCCAAGGAGAGGTGACAGTCGCGT  
CAATTGATGACTCTGATGAACTAATTGCCACAGACAGTGCTTTTGGATGTG  
CTGGGATTCACAGCTGAGGAAAAGATGGGTGTCTACAAGCTGACAGGTGC  
CATCATGCATTACGGAAATATGAAATTC AAGCAGAGGCAGCGTGAGGAGC  
AGGCTGAGCCTGATGGCACTGAGTCTGCTGACAAGTCAGCCTACCTGATG  
GGGTGAACTCAGCCGACCTTCTCAAAGGACTATGCCACCCAAGGTTAA  
AGTCGGCAATGAGTATGTCAAAAAGGGCCAAGGTGTTGATCAAGTCTACT  
ATACCCAACAAGAGGCCCTTCAAGTGCGAGGAGTGTGGCAAGAACTACAAC  
ACCAAGTTAGGCTACAAGCGTCACGTGGCCATGCACGCGGCCACCAGCGG  
CGACCTCACCTGCAAGGTGTGCCTGCAGAGCTATGAGAGCACGCCCCTGC  
TGCTGGAGCACCTCAAGAGTCACTCGGGGAAGTCTCGGGTGGGGCCAAG  
GAGAAGAAGCACCCCTGTGACCACTGCGACCGGCGCTTCTACACGCGCAA  
GGACGTGCGGCGCCACATGGTGGTGCACACAGGCCGCAAGGACTTCCTGT  
GCCAGTACTGCGCCCAGCGCTTTGGCCGCAAGGACCACCTGACCCGGCAT  
GTGAAGAAGAGCCACTCACAGGAGCTGCTGAAGATCAAGACGGAGCCACC  
GGACATGTTGGGCCTGCTGGGCTCCGGCTCCCCGCTTGCTCCGTCAAGG  
AGGAGCTCAGCCCATGATGTG---TATGGGGCCCTCCAAGGACTCCTTG  
ATGGGCAAGCCCTTCCCTGGTG-----CCTTCCCATGGGCATGTACAA  
CCCCAC-----CTGCAGGCTATGTCCAACCTCTGGGGTATCC----  
-----CACCACTCACTGGTGTCCGGGTCTCTGTCTGCAGCTATGGGG  
ATGGGCTGCCACATGGAGTACCTTATTTATGCATCGTTTTTCCCTTCATGGG  
ATGTTTACAAATCAGCGACGGATCGAATATAGTCAACCTTTTAGCCAGCA  
ACTCCCGAGTGTCTCGTATGCTCTGACCCAGCAGAAATATTTTCAGCAAT





>Alepisaurus ferox

AGTCTCCTTATCCGAGCCGAGCTAAGCCAACCCGGAGCCCTCCTGGGAGA  
TGACCAAATCTATAACGTAATCGTAACCGCCACGCCTTCGTAATAATCT  
TCTTCATAGTAATACCCGTTATAATCGGCGGGTTCGGAAACTGACTTATC  
CCCTTGATAATCGGGGCCCTGACATAGCCTTCCGCGAATGAACAACAT  
GAGCTTCTGGCTACTTCCTCCATCCTTCCTCCTCCTCCTCCTCCTCAG  
CTGTTGAAGCTGGGGCCGGAACAGGGTGAACAGTCTACCCTCCTCTAGCT  
AGCAACTTAGCCCACGCCGGAGCCTCGGTGACCTGACCATCTTCTCTCT  
CCATCTGGCGGGTATTTCTTCTATCCTGGGGGCTATTAACCTTCATCACA  
CAATTATTAACATGAAACCCCGGCCATCACCAATACCAAACCTCCCCTG  
TTTGTGTTGAGCCGTTCTAATTACCGCAGTCTTCTCCTACTCTCCCCTCC  
CGTCTTAGCGGCAGGCATCACTATGCTCCTTACAGATCGAAACCTAAACA  
CAACCTTCTTTGACCCAGCCGGCGGGGGGATCCAATTCTTTACCAACAC  
CTCTTCTGGTTCTTTGGCCACCCAGAAGTTTACATCTTAATTCTTCCCGG  
CTTCGGAATGATCTCCACATTGTTGCCTACTATTCAGGTAAAAAAGAAC  
CCTTCGGCTACATGGGCATGGTCTGAGCAATGATAGCAATCGGACTTCTA  
GGTTTCATTGTCTGAGCACCTCCCATGTTTACAGTCGGAATGGACGTAGA  
CACACGTGCCTATTTTTAGAGAAAAATCTGCATCCCTCAAATTGCTTGG  
AATGTTCTTCTCTCCGACGCTCATCAGTGCACGAAGCTCAACGAACTTT  
CCTGGAGCATGTGTCTCAGTCATTTCCCTACGATATGCAAGACTGAGGAC  
TTTTTGCAGTTGCCCAAAGACATGGCAACCCAGTTGCTATCCCACGAGGA  
GCTGGAGACGGAGGATGAGAGGCTGGTCTATGAGGCGGCCCTCAGCTGGG  
TTAACTATGACCTGGAGAGGAGGCACCTGCCACCTGACAGAGCTTCTGAGA  
ACAGTCCGGCTGGCCCTTCTACCGGCCATCTTCCCTCATGGAGAATGTATC  
CACAGAGGAGCTAATTAATTCCAGACCAAGAGCAAGGAACCTGTAGACG  
AGGCCATACGCTGCAAGCTGAGAATACTTCAGAACGATGGTGTGGTCAAC  
AGCCCATTTGGCAAGACCCAGAAAGACCAGCCATGCCCTTGTTCCTGCTCGG  
TGGCCAGACCTTCATGTGTGATAAGCTTTACCTGGTAGACCAGAAGGTCA  
AGGAGATCATTCCCAAGGCTGACATACCCAGCCCCAGGAAGGAGTTCAGC  
GCCTGCGCCATCGGCTGTAAGGTGTACATCACCGGTGGGA--GAGGCTC-  
AGAGAACGGTGTGTCCAAGATGTGTGGGTCTACGACACCGTCCACGAGG  
AATGGTCCAAGGCGGCCCATGCTCATTGCCAGTTTGGCCATGGCTCT  
GCAGAGCTGAAACACTGCCTCTATNNNNNNNNNNNNNNNNNNNNNNNNNNNN  
NNNNNGGATGAGTACATTGTGGTGTTCAGTC  
GTTCCACAACCTAGGCTGATTCTGAATGAAGCAGAGCTGATACTGGCACTG  
GCCCAAGAGTTTCAGATGAGGGTGGTCACTGTGTCCCTGGAGGAACAGTC  
TTTCCCCAGCATCGTACAGGTCATCAGTGGTGCCTCCATGTTGGTCAGTA  
TGCACGGAGCTCAGCTCGTCACCTCACTCTTCCCTCCTAGAGGATCTGCT  
GTTGTAGAGCTCTTCCCCTATGCCGTGAACCCAGAGCAGTACACTCCGTA  
CAAAACCTCGCCTCCCTACCGGGCATGGACCTTCAATACGTTTCTGGA  
GGAACACTGTTGAGGAGAACACCGTCTCCCACCCAGACAGACCCTGGGAG  
CAAGGAGGCATTGCCCATTTGGAGAAAGAAGAGCAGGAGAGAATCCTAGC  
CAGCACGGATGTCCCAGGCACCTATGCTGCCGCAACCCAGAGTGGCTCT  
TCAGGATCTACCAGGACACTCTGGTAGACATCCCCCTCCTTCTTAGACGTC  
CTCAA---GGAGGGCCTGAAG---ACGAGGCCAAGCTTGAAGAA---GTC  
CAAGCCGGCCAGCACGGTTCACCCGGGCCGGGTGCGAGAACCCCAAGTGCC  
AGACTTCAGTCCAAGCCACCAACGAGGCTAAACTCACAGTGTCTTGGCAG  
ATCCCGTGGAACCTTAAGTACCTGAAGGTGCGAGAGGTGAA-----  
-----AAGAAGGACACAAGCAAGGGAACCTGGAGGATCAAATCA  
TTCAGGCAAACCCCGCACTGGAGGCTTTCGGTAATGCCAAAACATGAGG  
AACGATAATTCTTCCCGTTTTGGAAAATTCATCAGAATCCACTTTGGAAA  
CAGTGGTAAGCTGTCTTCTGCGGACATTGAGACCTACCTGCTGGAGAAGT  
CACGGGTCACCTTTCAGCTTAAGGCAGAGAGGAACTACCACATATTCTTC







-----  
-----  
-----  
-----

-----ACAGGCGAAGTCACAGAAAGAGAAG  
TGGCTTTGGGGATAAACCCGTTTCGCGGACGGCATGGGCGCCTTCAAATA  
AACCACAGCTCCCACGACATCGGCTCCGG--GCAAACGGCGTTTTCTC  
CCAGGCG---CCCGGCTAC---GCGGCGGCCGCCCTGGGA---CACCACC  
A-----CCATCCGACCCACGTACGTCC---TATTCACGGCAGCCTTC  
AATTCCACGCGGGACTTTCTCTTCAGAAACCGGGGCTTCGGGGACGCCAC  
CAG-----CGCGCAGCACAGTCTGTTTCGCCTCCGC---CGCCG  
GAAGTTT---C-----GCAGGGCCACACGGACACTCAGATGCCGCGGGC  
CACCTGCTCTTCCCCGACTCCACGAG---CAAGCTGCGAGCCACGCGTC  
GTCTAATGTCGTGAACAGCCAGATGAGACTGGGCTTTTCCGGAGACATGT  
ACGGGCGGGCCGACCAGTATGGCCACGTTACGAGCCCGAGAT---CCGAC  
CACTACGCTTCGACCCAACGACGGCTATGGCCCCATGAACATGAATAT  
GGCCGCT---CACCACGGCGCGGGGGCCTTCTTTTCGGTACATGCGGCAGC  
CGATCAAACAAGAGCTGATCTGCAAGTGGATCGAACCGGAGCAACTGTTCG  
AACCCCAAAGAGTGTGCAACAAAACCTTTCAGCACGATGCACGAGCTCGT  
GACCCACCTGACGGTGGAGCATGTGGGAGGACCCGAGCAGTGAACCACA  
TTTGCTTCTGGGAAGATTGCGCCAGGGAAGGGAAACCGTTCAAAGCCAAA  
TACAAACTCGTAAATCATATCAGAGTTCACACCCGAGAAAAACCTTCCC  
GTGTCCGTTCCCCGCT-----

>Alepocephalus agassizii

AGCCTCTTAATTTCGAGCCGAGCTTAGCCAGCCCCGGCGCCCTCCTCGGCGA  
TGACCAAATTTATAATGTCATCGTACAGCACATGCCTTCGTAATGATTT  
TCTTTATAGTAATACCAATCATGATCGGAGGCTTCGAAACTGGCTACTC  
CCCCAATACTAGGGGCCCTGACATAGCATTCCCCGAATGAACAACAT  
GAGTTTCTGACTTCTACCCCCCTCACTCCTCCTCCTTTTCATCCTCAG  
GGGTTGAAGCTGGGGTGGGGACAGGGTGGACCGTCTATCCCCCTTGGCC  
GGCAACTTAGCCCACGCCGGTGCTCTGTAGACCTCGCCATCTTCTCTTT  
ACACCTGGCAGGTGTTTCCTCAATTCTGGGATCAATTAATTTTATTACCA  
CAATTACCAACATGAAGCCCCAGCCATCTCCCAATACCAGACACCCCTG  
TTCGTGTGATCCCTTCTCGTCACAACGTCCTACTTCTCCTGTCTCTCCC  
AGTTCTAGCCGCCGCTATCACCATGTCCTCACAGACCGTAATCTTAACA  
CAACATTTCTTTGACCCAGCCGGAGGAGACCCCATCCTATATCAACAC  
CTATTCTGATTCTTCGGCCACCCAGAGGTTTACATTCTAATCCTGCCCCG  
ATTTGGCATCGTCTCACACGTGTCGCCTACTACGCCGGTAAAAAGAAC  
CATTCGGTTATATGGGCATAGTTTGGGCTATAATAGCTATCGGACTCCTA  
GGATTTATTGTTTGAGCCACCACATGTTTACAGTGGGAATGGACGTAGA  
CACTCGTGCCTA-----

-----  
-----  
-----  
-----  
-----  
-----  
-----  
-----  
-----  
-----

-----  
-----  
-----  
-----  
-----GGATGAGTACATCGTGGTCTTCAGC  
CGCTCCGTCAACCGGCTCATCCTCAACGAGGCTGAGTTGATCCTGGCTCT  
GGCGCAAGAGTTCCAGATGAGGGCCATCACAGTGTCCCTGGAGGAGCAGT  
CGTTTGCCAGCATCGTTCAGTTGATCAGTGGGGCGTCCATGCTGGTCAGC  
ATCCACGGAGCCCAGCTGATCAGCTCCCTGTTCCCTGCCACGCGGCGCGGC  
CGTGGTGGAGCTCTTCCCCTACGCCATCAACCCAGAGCAGTACACGCCCT  
ACAAAACTCTGGCTTTGTTGCCAGGCATGGACCTCCAGTATGTGGCTTGG  
AGGAACACCATGGAGCAGAACTCGGTGGCTTACCCCTGAGCGTGCCTGGGA  
CCAGGGTGGCATCGCCACCTGGAGATGGAGGAACAGGAGCGCATCCTGG  
CGAGCGATGAGGTGCCGCGGCACCTATGCTGCCGCAACCCAGAGTGGCTC  
TTTCGGATTTACCAGGACCCCAGGTGGACGTCCCCTCCTTGCTGGAGGT  
CCTCAG---AGAAAATCTGAAG---GCCAAGCCTAACCTGAGAAA---GG  
CCAAGGCAGCTAGTACAGTACACCCCGGTAGAGTCAGGGAGCCCAAGTGC  
CAGACTTCGGTCCAGGCCACCAACGAGGCCAAGCTGACAGTGTGCTGGCA  
GATCCCCTGGAACCTCAAATACCTGAAGGTCAGGGAGGTCAAAATATGAAG  
TATGGATACAGAAGAAGGATGCCAGCAAAGGGACCTTGGAGGATCAAATC  
ATTCAAGCCAACCCAGCACTGGAGGCTTTTGGCAACGCCAAAACCTCAAG  
AAACGACAACCTCCTCACGCTTTGGGAAGTTCATTGCTATTCAATTTGGAA  
CGAGCGGCCAAACTCTCCTCTGCTGACATAGAAACTTACTTGCTTGAGAAA  
TCCCGCGTGACCTTTCAGCTCAAATCGGAGAGGAATTACCACGCTTCTA  
CCAGATATTGTCCAATGAAAAGCCAGAGCTGCTGGACATGCTGTTGATTA  
CCAACAACCCCTTATGATTATTGCTACATCTCCCAAGGAGAAGTAACAGTT  
AAGTCCATCAATGACAATGAAGAGTTGCTTGCCACTGACAGTGCCTTTGA  
TGTGCTTGGCTTCACTCCAGAGGAGAAGATGGGGATCTATAAGTTGACAG  
GTGCCATTATGCACTATGGCAACATGAAGTTCAAGCAGAAGCAGCGTGAG  
GAGCAGGCAGAGCCTGATGGCACTGAGGCAGCTGACAAGTCAGCCTACCT  
GATGGGGCTTAACTCTGCTGATCTTGTGAAGGGACTCTGCCATCCCAGGG  
TCAAAGTTGGCAATGAGTATGTAACAAAGGGACAAGGTGTAGATCAAGTC  
TATTAC-----

-----  
-----  
-----  
-----  
-----  
-----  
-----  
-----  
-----  
-----  
-----TACCTGATCTACGCTTCCTTCTCGTTCA  
TGGGATGTTTACAAAACACAGACGGATCCAACATAGTCAACCTTTGGCC  
AGCGACTCGCCAAGCGTGTCGTACGCTCTGACCCAGCGGAAGTATTTAG  
CAACTACAGCCCAGTGATAGGGTCTACATCTACGAGCCCATTGACTACT  
GGAACCTCCACGGTGCAGGAGCACCTCAGGACACTGGGCCAGGGATTCAT  
ACCATATCGTGGATCGATAATTACTTTCAGTATCTGAAGGTGACGAACGT  
CAGCGCGTGCACAAAAGCGACTTCATCGCCGTCCTCAAGACTTCGTTCC  
TGAGGAGTCCCAGATATCAGCACTTCACGGACGACATCATCTTTACAAA

A---CGGGCG-----ACGACTTCAACATCATCGCGTCCAGGTT  
GTACTTGGTGGCGGGACCACGGAGAAGACGCGGGAGGAGGTGGTGGAGC  
TGCTGGAGAGGCTCCGCCCCTCTCGCTCATCAACAGCATCAAGTTCATC  
GTGTTCAACCCACCTTCGTGTTACGGACCGCTACAGCTCCTCGGTCGT  
CTCCCCATCATGACGTCCGGATTCAGCGTCCTGACCGTGCTCGTGCTCA  
CGTTCCTCGTCGTCGAACCCACTGGGCAACTTCTGGCTGATACTGACC  
GTCACCTCCGTGGAGCTGGGCGTCTGGGCCTGATG-----  
-----  
-----  
-----  
-----  
-----  
-----  
-----  
-----  
-----  
-----  
-----  
-----  
-----  
-----  
-----  
-----  
-----  
-----  
-----  
-----  
-----  
-----  
-----  
-----

-----TCCTACA  
CCATCGAGATGGGCGCAAGAGGGCCTCAGTGGAAGGAGAGCCCCAGCCT  
TTCGCTTGCTCCATTGAGGACCCCACTAAGCAAACCAAGTTCAAGGGGAT  
TAAGACGTATATATCCTACCGCGTGACCCCAAGCAGTTCGGCCGGCCTG  
TGTACCGTCGCTACAAGCACTTTGACTGGCTGTATAACAGGTTGCTGCAC  
AAGTTCACGGTCATCTCTGTGCCCCACCTGCCTGAGAAGCAGGCGACTGG  
GCGTTTTGAGGAGGACTTCATTGAAAAGCGTAAGAGGCGGCTCATCCTCT  
GGATGGACCACATGACCAGTCACCCCTGTCCTCTCGCAGTACGAGGGCTTT  
GAACACTTCTTCATGTGCGGTGACGATAAACAGTGGAAGCTGGGCAAGCG  
GAGGGCGGAGAAGGATGAGATGGTGGGAGCCCACTTCATGCTCACCTTCC  
AGATCCCCAACGAGCACCAGGACCTGCAGGACGTGGAGGAGCGGGTGGAC  
TCCTTTAAGGCCTTTGCCAAGAAGATGGACGACAGYGCATGCAGTTAAC  
GCACGTGGCCTCCGAGCTGGTGCGCAAGCACCTGGGAGGGTTCGCAAAG  
AGTTCAAAGGCTGGGGAACTCCTTCCAGTCCATCAGCCAGGCTTTCATG  
CTGGACCCCCCTACAGCTCTGATGCCCTGAATAATGCCATCTCCAC--  
-----  
-----  
-----

-----  
-----  
-----  
-----  
-----  
-----  
-----  
-----  
-----  
-----  
-----  
-----  
-----  
-----  
-----  
-----  
-----  
-----  
-----  
-----  
-----  
-----  
-----  
-----  
-----GCCAAATCCCGCTTT  
CACCATGGCGTTCGGCAGGGGCTGGCAGCGACC---GCAGCGTCCCAC  
C---AACAGCTTGCTATCCCGCAACAAACCGATGAGACCGCAGTGG---  
CCTCCCGCAGCGATGGTTTTGTACCC---CTGCCAACAAACCGACTGGAC  
TTTGCCGCCTCGGCATACGATGCCGCGCTGCAGCTGATTTTGCAGGTA  
CGCGGCCACCCTTCTGTTCGTACGCAGCTGCCGAGTGAAAGCGC-----  
TCCCCTGCCACTGCAGGCTGCTCCAACAGAGCCTTGGGCTATTACGCG  
GAGCCGCCAG---GGTGG---GGCACACGCACCCACCGCAGTACTGT--  
-----AGTAAATCAAGCGCGGTTCTCTCATGCTGGCCCGCAATTCG  
TTGGGAGCAGAACATCCA---CCTCCAATTATCTGG---TTGGCTTGGAC  
GA---CGGG---GACGC---TATCGCACCTGAGAGGTCACCT---CT---  
CGGGGGGGCAGACGAA---GCCAAGCCAAAAGACCT-----GTCGGA--  
-ATCAAGCTGGATAGAG---ACCCGCTTCAATTAAGTCAATCGACTCA  
AGTGATTCTGGGATCTTTG---AGCAGGCCAAACGGAGGAGAATTCGCC  
ATCTGCTACACCG-----GTTTCAGAGACGTCGTCGCCATTAAAT  
CAGAA-----TGGGG  
ATAAATCCGTTTCGCCGACGGTATGGGAGCGTTCAAAATCAACCACAGCTC  
CCACGATTTTGCTCTGG---GCAAACGGCGTTTGCTCAGAGCG---C  
CCGGCTAC---GCAGCCGCTGCCCTGGGA---CACCATCA-----CCAC  
CCAACCCATGTCAGCTCC---TACTCCACCGCGGCTTCAACTCCACCCG  
GGACTTCTCTTTTCGGAATCGGGGATTCGGAGACGCCACTAG-----  
----CGCGCAGCACAGTCTCTTCGCCCTCAGC---TGCAGGAAGTTT---C  
-----GCAGGGCCACATGGACACACCGATGCCACGGGACACCTGCTCTT  
CTCGGGACTGCACGAG---CAAGCGGCGACGCACGCGTCTTCGAACGGG  
TGAACAGTCAGATGCGCCTGGGCTTTTCGGGGGACATGTACGGCAGAGCC  
GAGCAGTACGGTACGTAACGAGCCCCGGT---CCGAGCACTACGCTTC  
GACTCAGTTGCACGGCTATGGCCCCATGAACATGAATATGGCTGCC---C  
ACCACGGGGCAGGGGCCCTTCTCCGTTACATGAGGCAGCCGATCAAACAA  
GAGCTCATCTGCAAGTGGGTTGAACCAGAGCAGCTGTCGAATCCGAAAAA  
GTCCTGCAACAAAACTTTCAGCACGATGCATGAGCTCGTGACCCACCTCA  
CAGTGGAACATGTCGGGGGACCGGAACAGTCAATCACATTTGCTTTTGG  
GAAGAGTGTCGCGGAGAAGGGAAACCAATTTAAAGCCAAGTACAAACTTGT  
AAATCATATCAGAGTGCAC-----  
-----

>Alepocephalus bicolor  
AGCCTCTTAATCCGAGCCGAGCTTAGCCAGCCCCGGCGCCCTCCTGGGCGA  
TGACCAAAATTTATAATGTCATCGTCCAGCACATGCCTTCGTAATGATTT  
TCTTTATAGTAATACCAATCATGATCGGGGGCTTTGGAAACTGGCTACTC











NNNNNNNNNNNNNNNNNNNNNNNNNNNNNNNNNNNNNNNNNNNNNNNNNNNNNNNTGATGATTATA  
TAGTAGTGTTTAGTAGAACTTCTAACAGGTTGATACTCAATGAGGCAGAG  
TTGCTTCTTTCTTTGGCTCAAGAGTACAAAATGAGAACAGTCACCGTGTC  
CTTGGAGGAGCAAACATTTGCAAGTATAGTCCAGCTTATCAGTGCGGCAT  
CCATGCTGGTCAGCATGCATGGTGCTCAACTGATCACGTCCATGTTCCTA  
CCACGAGGGGCTGCTGTCATCGAGCTTTTTCCATACGCTGTCAACCCAGA  
ACAGTATACTCCATATAAAACTCTGGCCTCCTTGCCAGGAATGGACTTGC  
AGTACATAGCATGGAGAAACACCATTGAAGAGAATTCTGTAACCTATCCT  
GACCGCCCTTGGGACCAAGGAGGTATCACTCACCTGGAAAAAGAGGAACA  
GGAACGTATCCTAGCTAGTAAGGAGGTGCAGAGACACCTCTGCTGTCGCA  
ACCCAGAGTGGCTTTTCCGGATTTATCAAGACACCATTGTGGACATTCCT  
TCCTTCCTGGAAGTCTTCG---AGACGGTCTAAAA---ATTAAGCCTAA  
TCTGAAAA---GAGCAAACCTGTCAGTGTAGTCCATCCTGGTCGAGTCA  
GACATCCCAAGTGCCAGACATCAGTGCAGGCTGCCCATGAAGCAAAGCTG  
TCTGTGCTCCTGGCAGATTCTTGGAACCTCAAGTACTTGAAGGTAAGAGA  
GGTGAAATATGAAGTGTGGATCCAGAAGAAAGATTCTAACAAAGGGACAC  
TGGAAGATCAAATCATCCAGGCCAACCTGCACTAGAGGCTTTTGGAAT  
GCCAAAACAGTGAGAAATGACAACCTCATCTCGCTTTGGAAAGTTCATTCG  
CATTCATTTTGGAAACAAGTGGTAACTATCTTCAGCTGACATTGAAACAT  
ACCTGCTGGAAAAAATCACGAGTGACCTTTCAGCTAAAGGCAGAAAGAAAC  
TATCACATCTTTTACCAGATACTGACCAATGCAAAGCCTGAGCTGTTGGA  
TATGCTGCTGATTACAAATAATCCGTACGATTACTCTTACATCTCCCAAG  
GAGAAATATCTGTTCAATCCATCAATGATAGTGAGGAGTTAATGGCCACT  
GACAATGCATTTGATGTGCTAGGCTTCACCGCAGATGAGAAGACGGGAGT  
CTACAAACTGACGGGAGCCATCATGCATTATGGCAACATGAAATCAAGC  
AGAAACAGCGAGAAGAACAGGCAGAACCCAGATGGTACAGAAGCTGCTGAC  
AAGTCAGCCTACCTTATGGGGCTGAACCTCTGCTGATCTCCTGAAAGGACT  
CTGTCATCCACGGGTTAAGGTAGGAAATGAATATGTCACAAAAGGCCAGG  
GTGTGGATCAAGTATACTACCCCAACAAAGAGGCTTTTAAGTGTGAGGAG  
TGTGGCAAGCACTATAACACAAGCTAGGCTACAAACGGCATGTGGCCAT  
GCACTCTGCCACAGCAGGAGACCTGACCTGCAAGGTATGTTTTGCAGAGCT  
ACGAGAGCACTCCTGCCCTCTTGGATCACCTCAAGAGCCATTCTGGCAAG  
TCTTCAGGTGGTACCAAGGAGAAGAAACACCCATGCGATCACTGTGACCG  
TCGCTTCTACACCCGCAAGGATGTTCCGGCAGCACATGGTAGTGACACCG  
GTCGCAAAGATTTCTGTGCCAGTACTGTGCCAGCGCTTTGGAAGAAAG  
GACCACCTCACACGACACGTGAAGAAGAGCCACTCACAGGAGCTGCTGAA  
GATCAAGACAGAGCCACCAGATATGCTGACTCTACTTGGTTCTGGCTCTC  
CAACCTGTGCTGTCAAGGAAGAGCTCAGTCTTATGATGTGTAGCATGGGC  
CCCAACAAGGACTCCATGATGACCAAACCTTTCCGTAAGTGGTACCCCTTT  
CTCTATGGGCATGTACAACCCACACCAC-----CTCCAGGCCATGTCCA  
GCCCAGGATTGGGCCAC-----CATCACTCCTTGTTTCTGGGTCA  
CTGTCCGCTGCTATGGGTATGGGTGCTCCATGGAGNNNNNNNNNNNNNNNNNNNNNNNNNN  
NNNNNNNNNNNNNNNNNNNNNNNNNNNNNAGTGAATTTACTCG  
CCAGCAACTCACCAGTGTGTGCTTGGCCCTGACCCAGCAGAAACTGTTC  
AGCAACTATAGCCCGGTGATAGGATTCTACATCTATGAGCCTATTGAATA  
CTGGAACCTCACAGTACAGGAGCACCTCAAGACACTAGGGCAGGGTTTCA  
ATAAAATTTCTGGATTGATAATTACTTTAATTATTTGAAGGTACAAAT  
GTCAGCGCATCAACCAAAGCGATTCATCAATATTTCAAGACGTCTGTT  
TCTTAGAAGACCGGAGTATCAGCACTTCCGGAAGACATCATTTTCTCAA  
AAA---ATGGCG-----ATGAGTATGACATCATTGCATCCAGG  
ATGTACTTGGTAGCGAGAACCCTGAGAAGACAAGGGAGGAGGTGGTGGA  
GCTGCTGGAGAGACTCAGACCCCTCTCTTTATAAACAGCATCAAGTTCA  
TCGCTTCAACCCACCTTTGTGTTCATGGACCCTACAGTTCTTCAGTT

GTCTCCCCGATTCTAACATCAGGTTTCAGTGTCTGACCATCCTCATCCT  
CACGTTCTTCCTCGTCATTAACCCCTTAGGGAACCTCTGGTTGATTTTGA  
CCGTCACCTCTGTGGAGCTGGGTGTCCTAGGCCCTCATGGGCTTCCATCAA  
TTTGAGTGGCAACCAGCTCTCAAAAATGTCTCAAACTCTTGCAATACTGG  
GATCATCGATGGGCTTTCTGGGTGGACTGCCTCTGTAGATGATGTACCTG  
CAGAGACCATTTCTAGAAGATTCCGTTATGATGTGGCGCTGGTATCAGCG  
TTAAAGGACTTGGAGGAGGACATCATGGAGGGACTTAGAGAAAAAGGATT  
GGATGACAGCACCTGCACCTCAGGTTTCACTGTGGTGATTAAGGAGTCAT  
GTGATGGTATGGGAGATGTCAGTGAGAAGCATGGAGGAGGACCAGCTGTC  
CCAGAAAAGGCAGTGAGATTTTCTATTACAGTGATGTCTATCACTATTCA  
AGCTGAAGGTGAAGAG-----GAAG  
CAGTCACAATCTTCCAGGAAAAAAGCCTAACTCTGAGCTTTCTGTAGG  
CCACTGTGCCTCATGTTTGTGGATGAGTCTGATCATGAGATACTGACGGC  
CATCTTGGGACCTGTGGTGGCAGAGCGTAAAGCTATGAAGGAGAGTCGCC  
TCATTTCTCTATAGGTGGGCTCCAACGCTCCTTCCGCTTTTATTTTAGG  
AGCACAGGCTATGATGAAAAAATGGTGAGAGACATGGAAGGTTTGGAGGC  
TTCAGGCTCCACTTACATCTGCACCTCTGTGACTCAACACGAGCTGAAG  
CCTCTCAGAATATGGTACTTCACTCCATCACTAGAAGCCATGATGAAAAT  
CTTGAGCGCTATGAGATATGGGAACTAACCTTTTTCTGAGTCTGCAGA  
GGAGCTTCGGGATCGAGTCAAAGGGGTCTCAGCCAAGCCTTTCATGGAGA  
CACAACCCACATTAGATGCCTTGCACCTGTGACATTGGCAATGCTACTGAA  
TTCTACAAGATCTTCCAAGATGAAATTGCTGAAGTGTACTTGAAAA---  
CAAC---CCAACCTCGAGAAGAACGCAGACGCTGGCGGTCAGCCCTTGACA  
AGCAGTTGAGAAAGAAGATGAAGCTAAAACCAGTGATGAGAATGAATGGG  
AACTATGCCCGGCGACTTATGACCCGTGAGGCTGTTGAAGTGGTGTGTGA  
GCTAGTTCCCTTCAGAGGAGCGCCGTGAGGCTTTGAAAGAATAATGGAGC  
TGTATCTCCAGATGAAACCTGTGTGGCGTTTCACTTGTCCAGCTCGAGAG  
TGTCTGATCAGCTTTGCCGCTATAGCTTCAACTCTCAACGTTTTGCAGA  
GATCCTCTCCACCACATTCAAATATCGCTATGATGGCAAATTACTAACT  
ACCTCCACAAGACTTTAGCCCATGTACCTGAAATGTTGAGCGGGATGGC  
TCAATTGGTGCCTGGGCCAGCGAAGGGAATGAATCTGGGAACAAANNNNNNNNNNNNNNNNNNNNN  
NNNNNNNTCAGT  
GGAAGGAGAGTCCCTCAGCCTTTCATCTGCTCCATCGAGGATCCCACCAA  
CAGACCAAGTTCAAGGGCATTAAAGAGTTACATTTCTACAGAGTCACCCC  
CAGCCACACTAGCAGGCCCTGTGTATCGGCGCTATAAGCACTTTGACTGGC  
TGTACAATCGCCTGTGTCACAAATTTACCGTCATTTCCGTACCCACCTC  
CCGGAGAAGCAAGCCACCGGGCGNTTCGAGGAAGACTTCATCGAAAAGAGA  
AAGCGGCGGCTCATCCTATGGATGGATCACATGACCAGTCACCCGTTCT  
GTCTCAGTATGAGGGTTTCGAACACTTCCTCATGTGTGTGGATGACAAGC  
AGTGAAACTGGGAAAGCGTCGTGCTGAGAAGGATGAGATGGTGGGAGCT  
CATTTTATGCTCACTCTCCACATCCCATAAGAGCATCAGGACCTGCAAGA  
CGTCGAGGAGCGCATCGATACCTTCAAGGCCTTCGCCAAGAAAATGGACG  
ACAGCGTCATGCAGCTGACGCACGTCGCGTCCGAACTCGTCCGCAAGCAT  
CTCGGCGGCTTTCGCAAGGAGTTTCAGCGGCTGGGTAATGCTTTCCAGTC  
CATCAGCCAGGCGTTCATGCTGGACCCTCCGTACAGNNNNNNNNNNNNNNNNNNNNNNNNNNCC  
CTCGCCACATT  
CCTCAAATAACCTCCCTGGGCTTCATCATCGGGCTCGGTGTTGTGGGAA  
ACCTCTGATCTCCATCCTGCTGGTCAAAGACAAGAGCCTGCACCGTGCA  
CCCTATTACTTCTTGTGGACCTGTGCGCCTCTGACATCCTGCGCTCAGC  
CATCTGCTTCCCTTTGTATTACCTCGGTGAAGAACGGCTCGGCGTGGA  
CGTACGGCACCCCTCACGTGCAAAGTGATCGCCTTCTGGGTGTGCTCTCC  
TGCTTCCACACAGCCTTCATGCTGTTCTGTGTCAGCGTGACACGTTACTT  
AGCTATCGCACACCACCGCTTCTATACCAAACGGCTGACCCTGTGGACGT





-----CCCAACAAGGAGGCCTT  
CAAGTGTGAGGAGTGTGGGAAGCACTACAACACCAAGCTGGGATATAAGC  
GCCACGTGGCCATGCACTCTGCCACTGCGGGAGATCTCACCTGTAAAGTG  
TGCATGCAGACCTACGAGAGCACGCCGTTCTCCTGGAGCACCTCAAGAG  
CCTACTCTGGGAAGTCTTCGGGTGGCACCAAGGAGAAGAAACACCCGTGTG  
ACCACTGCGACCGCCGCTTCTACACCCGCAAGGATGTGAGACGGCACATG  
GTGGTCCACACGGGCCGCAAGGACTTCCTGTGCCAGTACTGTGCCAGCG  
CTTCGGCAGGAAGGACCACCTGACACGCCACGTGAAGAAGAGCCACTCAC  
AGGAGCTCCTGAAGATCAAGACGGAGCCTCCTGACATGCTAGGTCTTTTA  
GCTTCGGGCTCCTCGCCTTGCTCCGTGAAGGAAGAGCTCAGCCCCATGAT  
GTGCAGCATGGGTCCCAATAAAGACCCCATGATGGGCAAACCATTTCTCCA  
GTGGGGCCCCCTTCTCCATGGGCATGTACAACCCGCACCAT-----CTC  
CAGGCCATGTCTAATACTGGGGTGGGTACCCA-----CACCCGTCCCT  
GATGCCCGCTTCTTGTCTTCTGGCATGGGCATGGGCTGTCACATGGAAT  
ATCTCATATACGCTTCTTTCTCATTCATGGGATGTTTACAAATCAGTGAT  
GGATCGAATGTTGTAAATCTGTTGGCTAGTAACTCTCCGAGTGTCTCGTA  
TGCTATGACCCAGCAGAAATACTTTAGTAACTACAGTCCTGTGATTGGGT  
TTTACATCTACGAGCCCATCGAGTACTGGAACTCCACGGTGCAGGAGCAT  
CTGAAGACTCTGAGTCACGGTTTCAACAAGATCTCCTGGATGGACAACCTT  
TTTCCACTACCTGCGGGTGGTGAATGTGAGTGCCTCAACAAAGGGCGACT  
TCATCAGCATCCTCAAGGGCTCCTTCTGCGCAGCCCGGAGTACCAGCAC  
TTCACAGAGGACATCATATTCTCCAAGA--ACCGTGAGACCG-----A  
TGAGTATGACATTATCGCCTCGCGGATGTACTTAGTTGCACGGACNACGGA  
GAAGAAGCGCGAGGAGGTGGTGGAGCTTCTGGAAAAGCTCCGTCCGTTGA  
TGCTGATCAACAGCATCAAATTCATTGCCTTCAATCCCACGTTTGTGTTT  
ATGGACCGCTACAGCTCCTCTGTTCATCTCGCCCATCCTGACCTCAGGCTT  
CAGCGTACTCACAATCCTCATCCTCACATTCTTCTGGTTCATCAACCCCT  
TGGGGAACCTTCTGGCTCATCCTCACCGTGACGTGCGTGGAGCTGGGAGTG  
TTGGGTCTNNNNNNNNNNNNNNNNNNNNNNNNNNNNNNNNNNNNNNNNNNNN  
NNNNNNNNNTTAATGGGCTCTCTGGATGGGCTTCTCGGTGGATGACTGCCC  
TGCTGACACCATCACTAGGCGCTATCGCTATGATGTGGCACTGGTGTGAG  
CATTAAAAGACCTGGAGGAGGACATCATGGTGGGCTGAGAGAGAGCGGG  
ATGGAAGACAGCGCATGCACCTCAGGCTTCAGTGTCAAGATCAAAGAATC  
TTGTGATGGCATGGGCGATATCAGTGAGAAGCACGGTGGAGGACCAGCCA  
TTCTTGAGAAAGCTGTACGTTTCTCTTTGACTGTTATGTGAGTCTCTGTC  
CTGGCAGAGGACAAGGAG-----GA  
AGAGATGACCATCTTACTGAGCCAAAGCCAAACTCTGAACTGTCTTGCA  
AGCCTCTTTGCCTTATGTTTGTGGATGAGTCAGACCACGAGACAATCACA  
GCCATCCTGGGGCCTATAGTCGCAGAGCGTAATGCCATGAAAGAGAGTAG  
GCTCATCTTATCCATGGGTGGACTACCTCGCTCCTTCCGCTTCCACTTCA  
GAGGCACGGGATACGATGAGAAAATGGTGCCTGAGATGGAGGGCTTGGAG  
GCCTCAGGCTCCACATACATCTGCACTCTTTGTGACTCCAGTCGGGCAGA  
GGCATCTGAAAACATGGTGCTACACTCTGTACGCGCAATCATGACGAGA  
ACCTAGAGCGTTACGAAATATGGAGAACCAATCCCTTTTCTGAGTCTGTG  
GATCAGCTGCGAGACAGAGTCAAAGGGGTGTCTGCCAAGCCCTTTATGGA  
GACCCACCCACTCTGGATGCATTACACTGCGACATTTGGCAACGCAACCG  
AGTTCTACAAAATCTTCCAGGATGAGATCGGGGAGGTGTTCCAAAGGGT--  
--CAAC---CTCAGTCGGGAGGAACGGCGTAGCTGGAGAGCAGCGCTAGA  
TAAACAGCTGAGGACGAAAATGAAGCTTAAACCAGTAATGAGGATGAATG  
GGAACTTTGCCCGCAGGCTAATGACCCTGGAGGCTGCAGAGGTGGTGTGT  
GAGTTGGTGGCCACAGAGGAGAGAAGGGAGGCCCTGAGGGAGCTCATGAG  
GCTGTACATCCAGATGAAGCCAGTATGGCGTGCCACCTGCCAGCCAAGG  
AGTGCCCTGACCAGCTGTGCCGCTACAGCTTTAACTCCCAGCGCTTTGCC

GACCTTCTCCTCTACCTTCAAATATAGGTACAATGGGAAGATAACCAA  
TTACCTGCACAAGACCCCTGGCCCATGTTCCCGAAAANNNNNNNNNNNNNNNNNNNNNNNNNNNNNNNNNNNNNNNNNNNNNNNNNNNNNNNNNNNNNN  
NNNNNNNNNNNNNNNNNNNNNNNNNNNNNTCGTACACCATCGAA  
ATGGGTCCCYTGGGTCCCGTTGGAAGGAGAGCCCGCAGCCTTCTCTTG  
CTCCATCGAAGACCCACCAAACAGACAAAGTTAAGGGCATCAAGACGT  
ACATCTCGTACCGGTGACGCCAGCCACACGGCGCATCCCGTCTACCGG  
CGCTACAAACACTTTGACTGGGTGTACAACCGCCTGCTGCACAAGTTCAC  
TGTGATCTCCGTGCCACCTGCCGAGAAGCAGGCCACGGGGCGTTCG  
AGGAGGACTTCATCGAGAAGCGCAAGAGGGGACTGGTCCTGTGGATGAAC  
CACATGACCAGTCACCCGGTCTCTCCAGTACGAGGGCTTCGAGCACTT  
TCTGATGTGCGCCGACGACAAGCAGTGGAACTGGGCAAGAGGCGGGCGG  
AGAAGGACGAGATGGTGGGGCCCCATTTTCATGCTGACGCTGCAGATCCCC  
AACGAGCACCAGGACCTCCAGGACGTGGAGGAACGGGTGGACACCTTCAA  
GGCCTTCGCTAAGAAGATGGACGACAGCGTTTTTGACGCTCACACACGTGG  
CCTCGGAGCTGGTGGGAAGCACCTGGGCGGCTTCAGGAAGGAGTTCCAG  
AGGCTGGGGAACGCCCTCCAGTCTGTCAGCCAGGCCCTTCATGCTGGACCC  
TCCACACAGNNNNNNNNNNNNNNNNNNNNNNNNNNNNNNNNNNNNNNNNNNNNNNNNNNNNNNNNNNNNNNNNNNNNNNNNNNNNCTGACCTCT  
CTGGGTTCNTCATTGGAGTCGGTGTGGTTGGA  
AACCTCCTGATMTCCATCCTGCTGGTCAAAGACAAGAGCCTGCACCGAGC  
ACCTACTATTTTCTGCTGGACCTGTGCGCTCCGATATCCTCCGCTCTG  
CCATCTGCTTCCCTTTTGTCTTACCTCAGTCAAGAATGGATCTGCCTGG  
ACCTATGGCACGCTGACYTGCAAAGTGATCGCTTCCCTGGGTGTGCTCTC  
CTGTTTCCACACGGCGTTTATGCTATTCTGYGTGAGCGTCACCCGCTACC  
TGCCATYGCACATCATCGTTTTTCTACACCAAGAGRCTGACCTTCTGGACC  
TGCTGGCTGTCTGATGATGGTGGACGTTGTCAGTWGCTATGGCGTT  
CCCGCCGGTGTAGACGTRGGGACATACTCTTTTATCCGGGAGGAGGACC  
AGTGACATTCCAGCACCGCTCCTTCAGGGCRAATGATTCGTTGGGCTTC  
ATGCTCCTGCTGGCRCTCATTCTCCTGGCCACACAGCTGGTTTTACCTCAA  
GCTCATCTTCTTCGTCCACGACCGYCGAAAGATGAAGCCTGTCCAGTTCTG  
TGCTGCTGTGAGCCAGAAGTGGACCTTCACGGGCCAGGCGCCAGCGGG  
CAGGCGGGCYAACTGGCTGGCTGGATTTGGTAGAGGCCCCACCCCGCC  
TACTTTRCTGGGCATCCGGCAGAACAGCAACGCAGCGGGCCGAGGCGTC  
TGCTGGTATTGGATGAATTCAAACAGAGAAGAGGATTAGTAGGATGTTT  
TACATCATGACGTTTTTCTTCTGACTGTGGGGTCCCTATCTGGTAGC  
CTGCTACTGGCGGGTGTGGCAAGGGGCCCTGTAGTCCCTGGGGGCTACC  
TGACGGCAGCCGTGTGGATGAGCTTGGCCARGCTGGGGTCAATCCTTTC  
ATCTNNNNNNNNNNNNNNNNNNNNNNGCAAATCTCGCTTTCACCTGGCGTGGGGACCGGTCTGGCACGG  
AGC---GCAGCGTCCCACTCGGCAACAGCTTGCTCTCCCCGCAGCAAAGC  
GAGGAGCCCACTGTGGCACCCCCCGCAGCGATGGTTTTGTCACCC---C  
TGCCAAACAACCGACTGGACTTTGCTGCCCTCGGCATACGACGCCGCT----  
----GATTTCCGCGGTAACGCGGCCACCTTGCTATCCTACGCAGCGGCC  
GGAGTGAAAGCTC-----TTCCGCTGCCGACTGCAGCCTGCTCCAACCG  
GCCTCTTGGCTATTACGCAGACCCGTCGG--GCTGG---GGAGGACGCA  
CGCCGCGCAGTACTGTGGCGTCAACAGCAAACCCAGCTCGGTCTTTTCC  
TGCTGGCCCCCAACTCTATCGGTGGCCGAGCGGGCA---CCATGAACATA  
CCTGG-----CCGAGGA---GGTA---GACTC---CATAACGACGG  
AGAGGTCACCC---ATAGGCGGGCGGCTCGGAGGAG---GCCAAACCCAAG  
GACATGAC---GTCAGA---GTCGAGCTGGATAGAGACTACGCCGTCCTC  
CATAAAGTCAATCGACTCCAGCGACTCTGGCATCTTTG---AACAGGCAA  
AACGGAGAAGAATCTCACCTTCTGCCACGCCA-----GTTTCAGAG  
ACAGTGTCCCCTTAAAGTCCGAGNNNNNNNNNACAGGC GAAGTCACGGAGAGAGAAGT  
GGCGCTGGGGATAAAATCCGTTTCCGCTGATGGGATGGGAGCCTTCAAAAATAA  
ACCACAGCTCCACGATATTGGCTCCGG---ACAAACGGCGTTTCTCCTCC

CAGGCG---CCC GGCTAC---GCAGCAGCCGCCCTGGGA---CACCACCA  
-----CCACCCGACCCACGTTGGCTCT---TACTCTACGGCGGCGTTCA  
ACTCCACCAGGGACTTTCTCTTCAGAAATCGGGGTTTCGGGGATGCCACC  
GG-----GGCGCAGCACAGTCTGTTTCGCCTC-----CGG  
AAGTTT---C-----GCGGGGCCACATGGACACTCGGATGCGGCAGGGC  
ACCTGCTCTTCCC GGGGCTCCACGAG---CAAGCGGCGAGCCATGCGTCT  
TCCAACGTGGTCAACAGCCAGATGCGGGCTGGGCTTCTCGGGGGACATGTA  
CGGACGGGGCCGACCAGTACGGCCACGTTACGAGCCC GCGCT---CCGACC  
ACTACGCCTCGAGCCAGCTACACGGCTACGGCCCCATGAATATGAATATG  
GCCGCA---CACCACGGAGCAGGGGCCCTTCTTCCGATACATGAGGCAGCC  
GATCAAGCAAGAGCTCATCTGCAAGTGGATCGAGCCGGAGCAGCTGTCGA  
ATCCCAAAAAGTCGTGCAACAAAAC TTT CAGCACGATGCACGAGCTCGTG  
ACCCATCTGACGGTGGAGCATGTGGGGGGACCGGAGCAGACAAACCACAT  
CTGCTTCTGGGAGGAATGCGCCAGAGAAGGAAAGCCATTCCAAGCCAAAT  
ACAAACTTGTAATCATATCAGAGTGCACACCGGAGAGAAGCCCTTTCCA  
TGTCCGTTCCCCGGCTGTGGNNNN

>Anarhichas lupas

-----  
-----  
-----  
-----  
-----  
-----  
-----  
-----  
-----  
-----  
-----  
-----  
-----  
-----  
-----  
-----

-----TTCTAGAGAGAAAACCTTACCCGTCTAATTGCCTTGG  
CATGCTCCTGTCTGTGATGCCACCAGTGCACCAAGCTGTCAGAGCTCT  
CCTGGGGCATGTGCCTCAGCAATTTCCCCGCTATTTGCAAGACAGAAGAG  
TTCTCCAAGTGCCEAAAGATATGGTGGTGCAGCTTTTGTACACGAGGA  
GCTAGAGACAGAAGATGAGAAACTGGTTTATGAAGCTGCCCTTAACTGGA  
TCAACTATGACCTGGAAAAGAGACACTGCCACCTTCCGGAGCTCCTGAGG  
ACTGTCCGCTGTGGCCCTGTTGCCTGCCATCTTCTCATGGAGAATGTTTC  
GACAGAAGAGCTGATCAATTTCCAGTCCAAGAGCAAGGAGCTGGTGGATG  
AAGCTATCCGATGTAAGCTGAAGATCCTGCAGAATGACGGTGTAGTTAAC  
AGCCCGTGTGCCC GACCAAGAAAGACCAGCCATGCCCTATTTCTCTGGG  
AGGGCAGACTTTCATGTGTGACAAGTTGTACCTTGTGGACCAGAAAGCCA  
AAGAGATCATCCCAAGGCTGACATTTCCAGCCCCAGGAAGGAGTTCAGT  
GCCTGCGCCATCGGCTGTAAGGTGTACATCACTGGTGGGA--GAGGCTC-  
AGAGAATGGTGTGTCCAAAGATGTGTGGGTCTACGACACCGTCCATGAGG  
AATGGTCAAGGCAGCGCCCATGCTCATTGCCAGGTTTCGGCCATGGCTCT  
GCAGAGCTGAAACACTGCCTCTACGTGGTAGGAGGTCACACGGCAGCAAC  
TGGCTGCCTCCCAGCTTCTCCATCTGGATGATTACATCGTCTGTTTCAGT  
CGCTCAACAACAAGGCTGATACTGAATGAGGCGGAGCTAATCATGGCGCT  
GGCCAGGAGTTCAGATGAGAGTGGTACAGTGTCCCTAGAGGAACAGT  
CTTTCCCCAGTATCGTCCAGGTGATCAGCGGCGCTTCTGTGTTGGTCAGT

ATGCATGGCGCTCAGCTCATTACCTCACTCTTCCCTCCCCAGAGGAGCTGC  
TGTGGTGGAGCTGTTCCCCTTTGCTGTGAACCCAGAGCAGTACACCCCGT  
ATAAAACCCTCGCCACCCTTCCAGGCATGGACCTTCACTATATCTCCTGG  
CGGAACACTAAGGAGGAGAACACCATCACCCACCCAGACAGACCCTGGGA  
GCAAGGGGGCATCACTCACTTGGAGAAGGAGGAGCAGGAGCGTATACTGG  
AGAGCAGAGATGTCCCAGGCACCTGTGCTGCCGCAACCCAGAGTGGCTC  
TTCCGAATCTACCAGGACACTTTGGTGGACATCCCTTTCCTTCCCTGGAAGC  
CCTTAA---AGAGGGCATGAAG---ACAAAGCCCAGCGTGAAGAA---GT  
CAAAGCCGGCCAGCACAGTCCACCCGGGCGGGTCAGACAACCCAGTGT  
CAGACCTCGGTACAAACCACCAACGAGGCTAAACTCACAGTCTCCTGGCA  
GATCCCATGGAATCTGAAATACTTGAAGGTGAGAGAGGTGAAGTACGAAG  
TG-----AAAAGAGACACTAGCAAGGGGACGCTGGAGGACCAGATC  
ATCCAGGCCAACCCGGCGCTGGAGGCTTTCGGCAACGCCAAAACGCTGAG  
AAACGACAACCTCGTCTCGTTTTGGAAAATTTATCCGGATTCACTTCGGCA  
TGAGCGGAAAGCTGTGCTCTGCCGACGTGAGACTTACCTGCTGGAGAAG  
TCCCAGTGCACCTTTCAGCTCAAGGCTGAGAGGAACTACCACATCTTCTA  
CCAGATCCTGTCCAATCAGAAGCCAGAGCTGCTGGACATGCTGCTGATCA  
CCAACAACCCTTACGATTACTCCTACATCTCCCAAGGGGAGGTAACGGTC  
GCCTCCATCAACGACTCGGAGGAACTGCTGGCCACCGACAGTGCCTTCGA  
TGTGCTCGGCTTCACTCAGGAGGAGAAGATGGGCGTCTACAAGCTAACTG  
GTGCCATCATGCACTACGGCAACATGAAGTTC AAGCAGAAGCAGCGCGAG  
GAGCAGGCCGAGTCGGACGGGACGGAGGCTGCCGATAAAACCGCATACT  
AATGGGGCTGAATTCGCGACGTTATCAAGGGGCTGTGTCATCCAGAG  
TCAAGTTCGGAATGAATTCGTCACCAAAGGACAAAGTGTGGACCAAGTC  
TACTACCCCAACAAGGAGGCCTTCAAGTGTGAGGAGTGCGGGAAGCACTA  
CAACACCAAGCTGGGATATAAGCGCCATGTGGCCATGCACTCTGCCACGT  
CAGGGGATCTCACCTGCAAAGTGTGCATGCAGAGCTATGAGAGCACACCC  
GTGCTCTTGGAGCACCTCAAGACCCACTCGGGGAAGTCTTCGGGCGGCAC  
CAAGGAGAAAAAGCACCCGTCGACCACCTGTGACCGTCGTTTTCTACACAC  
GCAAGGATGTGAGACGGCACATGGTGGTCCACACGGGTCGAAAGGACTTC  
CTCTGCCAGTACTGTGCCAGCGCTTTGGCAGGAAGGACCATCTGACACG  
TCACGTGAAGAAGAGTCACTCGCAGGAGCTACTGAGGATCAAGACGGAGC  
CTCCGATATGTTGGTCTTTTAGCGTCCGGGTCACCACCTTGCTCTGTG  
AAGGAGGAGCTCAGCCCCATGATGTGCGGCATGGGTCCCAACAAAGACCC  
CATGATGGGCAAACCGTTCCCCAGCGGGGCCCTTTCCGATGGGCATGT  
ACAACCCCAACCAT-----CTCCAGGCCATGTCTAATTCTGGGGTGGGT  
CACCCG-----CACCCGTCCCTGATGCCAGTCCCTTGTCTGCAGCTAT  
GGGCATGGGCTGCCACATGGAATATCTCATCTACGCCCTTTTTTCATTCA  
TGGGATGTTTACAGATCAGTGATGGATCAAATATAGTGAACCTGCTGGCT  
AGTAACTCTCCGAGTGTTCCTACGCTCTGACCCAGCAGAAATACTTCAG  
TAACTACAGTCTGTGATTGGCTTCTACATTTATGAGCCCATCGAGTACT  
GGAACTCCACGGTGCAGGAGCACCTGAAGACCCTGAGTCATGGCTTCAAC  
AAGATCTCTTGGATGGACACCTTTTCCACTACCTGCGTGTGGTGAATGT  
GAGCGCGTCAACCAAGAGCGACTTCATCGCAATCCTTAAGGGCTCCTTCC  
TTCGCAGCCCGGAGTACCAGCACTTCACTGAGGACATCATTTTCTCCATG  
A---ACCGCGATACTG-----ACGAGTACGACATATCGCCTCTCGGAT  
GTACCTGGTGGCACGGACGACAGAGAAGAAGCGAGAGGAGGTGGTGGAGC  
TTCTGGAAAAGCTTCGTCCGTTGATGCTGATCAACAGCATCAAATGCATT  
GCCTTCAATCCCACGTTTGTGTTTATGGACCGCTACAGCTCCTCTGTTCAT  
CTCGCCATCCTGACCTCAGGCTTTAGCGTACTACAATCCTCATCCTCA  
CTTTCTTCCCTGGTCATCAACCCATTTGGGAACTTCTGGCTCATTCACG  
GTGACGTCGCTGGAGCTGGGCGTCTGGGTTTGGATGGGTTTTACCAGTT  
TGAGTGGCAGCCAGCTCTCAGGAATGTGTCTACATCTTGCAATGTTGGCA



TTATTAATGGGCTCTCTGGATGGGCTTCCTCGGTGGATGACATCCCAGCT  
GACACCGTCACTCGACGGTTTCGCTACGATGTGGCTCTGGTGTGAGCATT  
AAAGGATCTGGAGGAGGACATCATGGAGGGGCTGAGAGAGAGTGGGATGG  
AAGACAGTGTTCACCCGAGGCTTCAGTGTGATGATCAAGGAATCCTGT  
GATGGCATGGGCGATGTCAGCGAGAAGCACGGTGGAGGACCAGCTGTTCC  
TGAGAAGGCTGTGCGTTTTTCTTTCACTGTTATGTCGTCTCTGTCCTGG  
CAGACGAGGGGGAG-----GACAAG  
GTTACCATCTTTACTGAGCCAAAGCCAAACTCAGAAGTGTCTGTAAAGCC  
CCTTTGCCTGATGTTTGTGGATGAGTCAGACCACGAGACACTCACAGCTG  
TCCTGGGGCCTGTAGTTGCAGAGCGTAATGCAATGACAGAGAGCAGGCTC  
ATTCTGTCCATGGGTGGACTACCTTGCTCCTTCCGCTTTCACTTCAGAGG  
CACGGGATATGATGAGAAGATGGTGCAGGAGGTAGAGGGCCTGGAGGCCT  
CAGGGTCCACCTACGCTGCACTCTTTGTGACTCCACTCGGGCAGAGGCC  
TCTCAAACATGGTGCTACACTCCATCACTCGCAGCCATGAACAGAACCT  
AGATCGTTACGAAATATGGAGAACCAACCCCTTTTCTGAGTCTGTAGATG  
AGCTGCGGGACAGAGTCAAAGGGATCTCTGCCAAGCCCTTCATGGAGACC  
CAGCCCACAATGGATGCACTACACTGTGACATTGGCAATGCCACTGAGTT  
CTACAAAATCTTCCAGGACGAGATCGGGGAGGTGTACAAAAGGT---CA  
AA---CCAGCCGGGAGGAACGGCGCAGCTGGAGGGCAGCCCTGGATAAA  
CAGCTGAGGAAGACGGTGAAGCTTAAACCGGTGATGAGGATGAATGGGAA  
CTATGCCCGCAGGCTAATGACCCAAGAGGCTGTGAGGTTGTCTGTGAGC  
TGGTGCCCTCAGAGGAGAGGAGGGAGGCCCTGAGGGAGCTGATGAGGATC  
TACATCCAGATGAAGCCTGTGTGGCGAGCCACCTGCCCTGCCAAGGAGTG  
CCCTGACCAGCTGTGCCGCTACAGCTTTAACTCCCAGCGCTTTGCCGACC  
TTCTCTCCTCTACCTTCAAATACAGGTACAATGGAAAGATAACTAATTAC  
CTGCACAAGACCCCTGGCCATGTGCCCTGAAATCATAGAGAGAGATGGATC  
CATAGGAGCCTGGGCCAGCGAGGGGAACGAGTCCGCAACAAGTCGTACA  
CCATCGAGATGGGCCCGTATGGCCCTGTGGAAGGAGAGCCACAGCCT  
TTCTCCTGCTCCATCGAGGACCCCAAAAACAGACAAAGTTCAAGGGCAT  
CAAGACGTACATTTTCGTACCGGGTCACGCCGAGCCACACGGGGCATCCCG  
TCTACAGGCGCTACAAACACTTTGACTGGCTGTACAACCGCTTACTGCAC  
AAGTTCACTGTGATCTCCGTGCCTCACCTGCCTGAGAAGCAGGCCACGGG  
GCGATTTGAGGAGGACTTCATCGAGAAGCGCAAGAGACGGCTGATACTGT  
GGATGAACCACATGACCAGCCACCCGGTCTCTCCAGTACGAGGGCTTC  
GAGCACTTCTGATGTGCGCTGACGACAAGCAGTGGAAACTGGGCAAGAG  
GCGGGCGGAGAAGGACGAGATGGTGGGTGCCATTTTCATGCTGACCCTGC  
AGATCCCCAACGAGCACCAGGACCTTCAGGATGTGAGGAGCGGATCGAC  
ACCTTCAAGGCCTTCGCCAAGAAAATGGACGACAGCGTGATGCAGCTCAC  
GCACGTTGCCCTCGGAGCTAGTGCGCAAGCACCTGGGCGGGTTAGGAAGG  
AGTTCCAGCGGCTGGGAAATTCTTTCCAGTCCATCAGCCAGGCATTCATG  
CTGGACCTCCCCACAGCTCGGAGGCCCTCAACAAAGCCATCTCCCATNNNNNNNNNNNNNNNNNNNN  
NNNNNNNNNNNGG  
TTTTATCATTGGAGTCGGTGTGGTTGGAAACCTCCTAATCTCCATCCTGC  
TGGTCAAAGACAAGAGTCTGCACCGAGCGCCCTACTATTTCCCTGTTGGAC  
CTGTGCGCCTCTGACATCCTGCGCTCTGCCATCTGCTTCCCCTTTGTCTT  
CACCTCGGTCAAGAAATGGATCCACCTGGACCTATGGCACGCTGACCTGTA  
AAGTGATCGCCTTCTGGGTGTGCTCTCCTGTTCCACACAGCGTTTATG  
CTGTCTGTGTGACGCTCACACGCTACCTGGCCATCGCACACCACCGTTT  
CTACACCAAGAGGCTGACCTTCTGGACCTGTCTAGCTGTGATCTGCATGG  
TGTGGACGTTGTGCGTGGCTATGGCATTCCC GCCGGTGTAGATGTAGGG  
ACGTACTCTTTTATCCGGGAGGAGGACCAGTGCACATTCAGCACCCTTC  
CTTTAGGGCGAATGATTCGCTGGGCTTCATGCTCCTGCTGGCGCTCATCC  
TCCTGGCCACGCAGCTGGTTTACCTCAAGCTCATCTTCTTCGTCCACGAC

CGTCGAAAGATGAAGCCTGTCCAGTTTGTGCCTGCTGTCAGCCAGA ACTG  
GACCTTCCACGGGCTGGCGCCAGCGGGCAGGCGGGCCAACTGGCTGG  
CCGGATTCGGTCGAGGCCCCACCCGCCTACCTTGCTGGGCATCCGGCAG  
AACAGCAACGCAGCGGGCCGCAGGCGTCTACTGGTGTGGATGAATTCAA  
AACAGAGAAGAGGATTAGCAGGATGTTCTACATCATGACGTTTTTCTTCC  
TGGCGCTGTGGGGGCCCTATCTGGTCGCCTGCTACTGGCGGGTGTGGCA  
AGGGGCCCTGTGGTCCCTGGGGGTACCTGACGGCCGCCGTGTGGATGAG  
CTTTGCCAGGCTGGGGTCAATCCTTTCATCTGCATCTTCTCCAACAGNNN-

-----  
-----  
-----  
-----  
-----  
-----  
-----  
-----  
-----  
-----  
-----  
-----  
-----  
-----  
-----  
-----  
-----  
-----  
-----  
-----  
-----  
-----

-----CATCACTCAACAGGCGAAGTCACAGAGAGAG  
AAGTAGCGTTGGGGATCAATCCGTTTCGCGGATGGGATGGGCGCCTTCAA  
ATAAACACAGCTCCCACGATATCGGCTCCGG---ACAACGGCGTTTTTC  
CTCCAGGCG---CCGGCTAC---GCGGCAGCCGCACTGGGA---CACC  
ATCA-----CCACCGACCCACGTTGGCTCT---TACTCCACGGCGGCT  
TTCAACTCCACCAGGACTTTCTCTTCAGAAATCGGGGTTTCGGGGACGC  
CACCGG-----GGCGCAGCACAGTTTGTTCGCCTC-----  
-CGGAAGTTT---C-----GCAGGGCCACATGGACACTCGGATGCAGCG  
GGGCACCTGCTCTTCCCGGGGCTCCACGAG---CAAGCAGCGAGCCATGC  
GTCTTCCAACGTGGTCAACAGCCAGATGCGGCTGGGCTTCTCGGGGGACA  
TGTATGGACGGGCCGACCAGTACGGCCACGTTACGAGCCACGGT---CC  
GACCACTACGCGTCGACCCAGCTGCACGGCTATGGCCCCATGAACATGAA  
TATGGCCCGC---CACCACGGAGCAGGGGCTTCTTTCGATACATGAGGC  
AGCCGATCAAGCAAGAGCTCATCTGCAAGTGGATCGAGCCGGAGCAGCTG  
ACGAATCCCAAAAAGTCGTGCAACAAAACCTTTTAGCACGATGCACGAGCT  
CGTGACCCATCTGACGGTGGAGCATGTGGGGGGACCAGAGCAGACCAACC  
ACATCTGCTTCTGGGAGGAATGCGTCAGAGAAGGAAAGCCATTCAAAGCC  
AAATACAAACTTGTAATCATATCAGAGTACACACCGGAGAAAAGCCCTT  
TCCGTGTCCGTTCCCCGGCTGTGGCAA

>Anguilla rostrata

AGCCTTCTAATCCGTGCCGAATTAAGTCAACCAGGCGCCCTTCTTGGAGA  
TGACCAAATTTACAATGTCATCGTCACAGCGCATGCCTTTGTAATGATTT  
TCTTTATAGTAATGCCAGTAATAATCGGAGGATTTGGCAACTGACTTGTG  
CCATTAATAATCGGCGCTCCAGACATAGCATTCCCCGAATAAATAATAT  
AAGCTTCTGACTTTTACCCCCATCATTTCTTCTACTACTAGCCTCCTCTG  
GAGTAGAGGCTGGGGCTGGTACAGGCTGAACTGTATATCCGCCCCCTGGCT  
GGAAACTTAGCCCACGCCGAGCATCTGTTGACCTGACAATTTTCTCACT  
TCACCTTGCAGGTATCTCATCAATTCAGGGGCCATTAATTTTATTACTA  
CAATTATTAACATGAAACCGCCTGCAATTACACAATACCAAACCTCCCCTG  
TTCGTATGAGCTGTATTAGTAACCGCTGTTCTGCTACTCCTCTCCCTGCC  
AGTCCTAGCCGCAGGCATTACAATACTTCTAACTGACCGAAATCTAAATA

CAACCTTCTTTGACCCTGCAGGGGTGGGGACCCAATCCTCTACCAACAC  
TTANNNNNNNNNNNNNNNNNNNNNNNNNNNNNNNNNNNNNNNNNNNNNNNNNNNNNNNNNNNNNNNNNNNNNNNNNNNNNNNNNNNNNNNNNNN  
NNNNNNNNNNNNNNNNNNNNNNNNNNNNNNNNNNNNNNNNNNNNNNNNNNNNNNNNNNNNNNNNNNNNNNNNNNNNNNNNNNNNNNNNNNNN  
NNNNNNNNNNNNNNNNNNNNNNNNNNNNNNNNNNNNNNNNNNNNNNNNNNNNNNNNNNNNNNNNNNNNNNNNNNNNNNNNNNNNNNNNNNNN  
NNTTACTGGAGAGGAACCTGCACCCACCAACTGCCTGGGCATGCTGCT  
GCTGTGCGACGCCACCAGTGCGCCAAGCTGTGCGAGCTCTCCTGGGGCA  
TGTGCCCTGAGCAACTTCCCCACCATCTGCAAGACGGAGGACTTCTTGCAG  
CTGCCCAAAGACATCCTGGTCCAGCTGCTTTCCCACGAGGAGCTGGAGAC  
GGAGGACGAGAGGCTGGTGTACGAATCGGCCCTCAACTGGGTCAACTACG  
ACCTGGAGAGGAGGTACTGCGACCTCCCCGAGCTGCTACGCACTGTCCGA  
CTGGCCCTGCTGCCCGCCATCTTCTCATGGAGAACGTCTCCACCGAGGA  
GCTCATCAACAAGCAGGTGAAGAGCAAAGAGCTGGTGGACGAGGCCATCC  
GGTGCAAGCTGAAGATCCTGCAGAACGACGGTGTGGTGACCAGCTTGTGC  
GCCCCGCCAGGAAGACCAGCCACGCCCTCTTCTTGGGCGGTCAGAC  
CTTCATGTGCGACAAGCTGTACCTGGTGGACCAGAAGGCCAAAGAGATCA  
TCCCCAAGGCCGACATCCCCAGCCCTCGCAAGGAGTTCAGCGCCTGCGCC  
ATCGGCTGCAAGGTGTACGTGACGGGGGGGC--GGGGCTC-CGAGAACGG  
GGTGTCCAAAGACGTTTGGGTCTATGACACCCTGCACGAGGAGTGGTCCA  
AGGCCGCGCCCATGCTCATCGCCAGGTTTCGGACACGGCTCGGCCGAGCTC  
AAGCACTGCCTCTACGTGGTGGGCGGGCACACGGCCGCCACCGGCTGCCT  
GCCGGCTCCCCGTCAGGACGAGTATATTGTGGTCTTCAGCCGCTCTCTT  
AACAGGCTGATCCTGAACGAGGCGGAGCTGATCCTGGCACTAGCGCAGGA  
GTTCCAGATGAAGGTCGTACCGTGTCCCTGGAGGAGCAGTCTTTGCGG  
ACATCGTCCGAGTCTCAGCAGGGCGTCCATGCTGGTCAAGTATGCATGGG  
GCCAGCTGGTCACTCTCTCTTCTTCTCGTGCGCCGCTGTGGTGGG  
GCTGTATCCATATGCCGTCAACCCAGAGCATTATGCTCCCTACAGGACAC  
TGACCTCGCTGCCAGGTATGGACCTGCAGTATGTGGCCTGGAGGAACACC  
AAGGAGGAGAACTCTGTGACCTTCCAGAGCGTGCCTGGGATCAGGGTGG  
CATTGCACACTTGGAGAAGGAGGAGCAGGAACGTATCATGAAGAGCAAGG  
AGGTGCCGCGACACCTGTGCTGTGCGAACCAGAGTGGCTTTTCCGCATC  
TACCAGGATAACCAAGGTGGACATTGCCCTCCCTTCTGGATGCCCTGCA---  
CCAGGGACTGGCC---TCCAGGCCAGGGCCCAAGAG---GGCTAGGCCTG  
CCAGCACAGTCCACCCAGGCAGGGTGAGGGAGCCCAAGTGCCAGACCTCC  
GTCCAGGCCGACCAACGAGGCCAAGCTGACCGTGTCTTGGCAGATCCCCTG  
GAACCTCAAGTACCTGAAGGTGAGGGAGGTGAAGTATGAGGTATGGATTTC  
AGAAGAGGGATAACCAGCAAGGGAACACTGGAGGATCAAATTATCCAGGCA  
AACCCAGCCCTGGAGGCTTTTGGCAATGCCAAGACTGTGAGAAATGACAA  
CTCCTCACGTTTTGGGAAATTCATTCGCATTTCATTTCCGAGTAAGTGGCA  
AGCTGTCTCTGTGACATAGAAACCTACCTACTCGAGAAATCCCGTGTCT  
ACCTTTCAGCTCAAAATCTGAGAGGAACTATCAYATTTTCTACCAGATCAC  
ATCCAACAAAAAGCCAGAATTGCTGGACATGATGTTAATCACCAACAACC  
CGTACGATTATGCTTATGTCTCCCAAGGAGAGGTGACGGTTCGCATCCATC  
GATGACTCAGAGGAACTGATCGCCACAGACAGTGCCTTTGATGTGCTGGG  
CTTCACGCCCCGAGGAGAAGATGGGCGTCTATAAGCTGACGGGTGCCATCA  
TGCATTACGGAAACATGAAATTCAGCAGAAGCAGCGTGAGGAGCAGGGC  
GAGCCTGATGGCACTGAGTCTGCTGACAAGTCAGCCTACCTGATGGGGCT  
GAACTCTGCTGACCTTCTCAAGGGACTCTGCCATCCACGGGTAAAGTTCG  
GAAATGAGTATGTCACCAAAGGTCAAATGTGGATCAAGTCTACTAT---

-----  
-----  
-----  
-----  
-----





GGGGCTCATGGACACTCAGATGCCACCGGACACCTTCTATTCCCGGGACT  
GCACGAG---CAGGCAGCCACACATGGGTCTCCGAACGTTGTAAATAGTC  
AGATGCGTCTGGGGTTTACCGGGGACTTGTACGGCAGAGCACAACACTAT  
GGGCAGGCGACCAGTCCCAGGT---CTGAGCACTATGCATCGACACAGTT  
GCACGGTTATGGTGTATGAATATGAACATGGCTGCA---CACCACGGGG  
CTGGGGCCTTTTTTCGATACATGAGGCAACCGATTAAACAAGAGCTTATC  
TGTAAGTGGATTGAACCGGACCAGCTGTGCAATCCCAAAAAGTCTTGTA  
CAAACTTTTCAGCACCATGCACGAGCTCGTGACTCACCTCACAGTTGAGC  
ATGTTGGGGGCCAGAACAGTCAAAATCACATCTGCTTTTGGGAAGAATGT  
CCCCGGGAAGGCAAGCCATTTAAAGCTAAATACAAGCTAG-----  
-----  
-----

>Anomalops katoptron

AGCCTTCTCATCCGAGCTGAGCTTAGTCAACCTGGGGCACTCTTAGGAGA  
TGACCAGATTTACAATGTAATTGTTACAGCACATGCCTTCGTAATAATTT  
TCTTTATAGTAATGCCAATCATGATTGGTGGCTTTGGCAACTGATTGGTA  
CCCCAATGATTGGGGCTCCAGACATGGCATTCCCACGAATAAATAACAT  
AAGCTTCTGACTTCTTCCCCCTCTTTCCTTCTCCTTCTAGCCTCTTCCG  
GAGTTGAAGCAGGTGCCGGAACCGGATGAACCGTCTACCCACCCCTTGCG  
GGGAACCTCGCCCACGCAGGGGCTCCGTAGACTTAACCATCTTCTCCCT  
ACATCTTGCAGGTGTCTTCTATTTCTGGGTGCCATTAATTTTATTACAA  
CCATTATTAACATGAAGCCCCCTGCCATCTCCCAATACCAAACCCACTA  
TTTGTGTGAGCCGTATTAATTACAGCAGTCCCTGCTTCTACTATCCCTTCC  
AGTCCCTTGCAGCCGGCATCACAATACTCCTCACAGACCGAAACTTAAATA  
CAACCTTCTTTGACCCTGCAGGGGGAGGCGACCCCATTTCTGTACCAACAC  
CTG-----  
-----  
-----  
-----

-----TTTCTAGAGAGAAACCTTACCCATCTAACTGCCTGGG  
GATGCTGTTGCTGTCTGATGCACACCAGTGTACCAAGCTATCAGAGCTCT  
CCTGGGGCATGTGCCCTCAGCAACTTCCAGCTATTTGCAAGACCGAGGAC  
TTCCCTCCAGCTGCCCAAAGACATGGTGGTGCAGCTTCTATCCCATGAGGA  
GCTGGAGACAGAAGATGARAGATTGGTTTATGAAGCTGCCCTTAACTGGG  
TCAACTATGACCTGGAAGGAGGCACTGCCACCTGCCAGAGCTGCTGAGA  
ACGGTTCGCTTGGCCCTGCTGCCTGCCATCTTCCCTCATGGAGAATGTCTC  
TACAGAAGAGCTGATCAATGCCCAGGCCAAGAGCAAGGAGCTGGTGGATG  
AGGCCATTTCGGTGAAGCTGAAGATCTTGCAGAATGACGGCGTGGTTAAC  
AGCCCCGTGTCTCGGCCAAGAAAACCAGCCATGCCCTTTTCTTATTTGGG  
AGGGCAGACCTTCATGTGTGACAAGTTGTATCTGGTGGACCAGAAGGCAA  
AAGAGATCATCCCCAAGGCTGACATCCCCAGCCCTAGGAAGGAGTTCAGT  
GCCTGCGCCATTGGCTGCAAGGTCTACATCACAGGTGGCA--GAGGCTC-  
AGAAAATGGTGTATCTAAAGATGTATGGGTCTATGACACCATCCATGAGG  
AATGGTCCAAGGCAGCACCCATGCTCATCGCCAGATTTGGTTCATGGCTCT  
GCTGAGCTGAAACACTGCCTTTACGTAGTAGGAGGTCACACAGCAGCAAC  
TGGTTGCCTCCCAGCCTCTCCCTCCGGATGAATACATTGTAGTCTTCAGC  
CGTTCAACAACAAGGCTGATTCTGAACGAAGCAGAGCTAATCATGACGCT  
GGCCAGGAATTTTCAGATGAGAGTGGTTACGATCTCCCTGGAGGAACAAA  
CTTTCCCCAGCATTGCCAGGTAATCAGTGGGGCTTCCATGTTAGTCAGT  
ATGCATGGAGCTCAGCTTGTCACTTCACTTCTTCCCTCCCCAGAGGAGCTGC  
TGTGGTGGAGCTGTTCCCTATGCTGTCAACCCAGAAGTATAACCCAT  
ATAAAACCCTCGCCTCCCTACCAGGCATGGACCTTCAATATGTTTCCCTGG  
AGGAACACTATAGAGGAGAACACTGTCACCCACCAGACAGACCCTGGGA

ACAAGGAGGCATTGCCCATTTGGAAAAGGATGAGCAAGAGCGAATACTGG  
CCAGCAATGATGTCCCCAGACACCTGTGCTGCCGCAATCCAGAGTGGCTC  
TTCCGAATCTACCAGGACACTTTGGTGGACATCCCTTCATTCCCTGGAGGT  
CCTCAA---AGAGGGCCTGAAG---ACCAGGCCAGCTTGAAGAA---GA  
CCAAGCTGGCCAGCACGGTTCACCCAGGCCGGGTCAGAGAACCCAGTGC  
CACACCTCAGTCCAAGCCACCAATGAGGCTAAACTCACGGTTTCCCTGGCA  
GATCCCATGGAATCTGAAATACCTGAAGGTGAGAGAAGTGAAGTACGAGG  
TG-----AAGAAAGATACCAGCAAAGGAACACTGGAGGATCAAATC  
ATCCAGGCAAACCCTGCACTGGAGGCTTTTGGTAACGCCAAAACAGTGAG  
GAATGACAATTCATCCCGTTTTGGAAAATTCATCCGAATTCACTTTGGAA  
CCAGTGGCAAGCTGTCTCTGCTGATATTGAAACTTACCTATTGGAGAAG  
TCACGTGTCACCTTCAACTCAAGGCTGAGAGGAACTACCACATCTTCTT  
CCAGATATTGTCCAATCAGAAGCCAGAGCTGTTGGACATGATGTTGATCA  
CTAACAACCCATATGACTACTCCTACATCTCCCAAGGAGAGGTAACAGTA  
GCATCCATCAACGACTCAGAGGAGCTGATGGCCACTGACAGCGCTTTTGA  
CGTCCCTTGGTTTTCACTCAAGAGGAGAAGATGGGAGTATATAAGCTGATTG  
GTGCAGTTATGCACTATGGCAACATGAAGTTTAAGCAGAAGCAGCGTGAG  
GAGCAGGCTGAGCCTGACGGAACAGAGGCTGCTGATAAGTCAGCTTACCT  
TATGGGACTGAACTCGGCAGACCTCATCAAAGGGCTATGCCATCCCAGAG  
TCAAAGTAGGAAATGAATATGTCACCAAAGGCCAAGGTGTAGACCAAGTC  
TACTACCCAAACAAGGAGGCCTTCAAGTGCAGAGGAGTGTGGCAAGCACTA  
CAACACCAAGCTGGGATACAAACGCCATGTGGCCATGCACTCTGCCACAG  
CAGGGGACCTTACCTGTAAAGTGTGCATGCAGAGCTATGAGAGCACGCCG  
GTGCTCCTGGAGCACCTTAAGAGCCACTCGGGGAAGTCCCTCGGGTGGCGC  
CAAGGAGAAAAAACCCATGCGACCACTGCGACCGCCGTTTCTACACAC  
GAAAGGATGTGAGAAGGCACATGGTGGTCCACACGGGCCGAAAGGACTTC  
CTGTGCCAGTACTGTGCCAGCGCTTTGGCAGGAAGGATCACCTGACACG  
CCACGTAAAGAAGAGCCACTCGCAGGAGCTGCTGAAGATCAAGACGGAGC  
CTCCAGATATGTTAGGTCTTTTAGGTTCTGGCTCACCGCCATGCTCTGTC  
AAGGAGGAGCTTAGCCCTATGATGTGCAGCATGGGTCCCAACAAAGACCC  
CATGATGGGTAAACCCTTCCCAGCGGGACCCCCCTCCCATGGGTATGT  
ACAACCCCCACCAC-----CTCCAGGCCATGTCCAATTCTGGGGTGGGT  
CACCCC-----CACCCCTCCCTGATGCCTAGCTCCCTCTCTGCAGCTAT  
GGGCATGGGCTGTACATGGAATATCTCATCTATGCTTCTTTCTCATTCA  
TGGGATGTTTACAAATCAGCGATGGCTCAAACATTTGTGAACTTGTGGCT  
AGTAACTCTCCGAGTGTTCATATGCTCTGACCCAGCAGAAATACTTTAG  
TAATTACAGTCCCTGTGATTGGATTTTACATTTACGAGCCCATTGAGTACT  
GGAACTCCACAGTGCAGGAGCATCTGAAGACACTGAGTCATGGCTTCAAC  
AAGATCTCCTGGATGGACAACCTTCTTCCACTACCTGCGGGTGGTGAACGT  
GAGCGCGTCGACCAAGAATGACTTTATCAGCATCCTAAAGGGCTCTTTCC  
TGCGTAGCCCTGAGTACCAGCACTTCACTGAGGACATCATCTTCTCCAAG  
A---ACCGTGAGAGTG-----ATGAGTATGACATTATTGCCTCGCGCAT  
GTACCTAGTGGCGCGGACCACAGAGAAGAAGCGCGAGGAGGTGGTGGAGC  
TTCTGGAGAAACTGCGTCCACTGATGCTGATCAATAGCATCAAGTTCATC  
GCCTTCAACCCACCTTTGTTTTTCATGGACCGCTACAGCTCCTCAGTCAT  
CTCACCCATCCTGACCTCAGGCTTCAGCGTGCTCACCATCCTCATCCTCA  
CTTTCTTCCCTGGTCATCAACCCCTTGGGGAACCTTCTGGCTCATCCTCACA  
GTTACTTCTGTGGAGCTGGGTGTCTTGGGTTTAAATGGGCTATCATGTATT  
CGAATGGCAGCCGGCCCTCAAGAATGTGTCTGCATCCTGCCATGTGGGCA  
TTATTAATGGTCTCTCTGGATGGGCTGCCTTGGTGGATGATACCCAGTT  
GACACCATTACTCGGCGGTTTTCGCTACGATGTGGCCCTGGTATCAGCCTT  
AAAGGATCTGGAGGAAGACATCATGGAGGGACTGAGAGAGAGTGGGCTTG  
AAGACAATGCTTGACCTTGGGCTTCAGTGTTATGATCAAGGAATCTTGT





TTGTGGGGGCCCTATCTGGTAGCCTGCTACTGGCGGGTGTGTTGCAAGGGG  
CCCCGTAGTCCCCGGGGGCTACCTGACGGCAGCCGTGTGGATGAGCTTTG  
CCCAGGCTGGGGTCAACCCCTTCATCTGCATCTTCTCTAACAGGGAGGCC  
AAAACTCGCTTTCACCCCTGGCGTGGGGACTGGGCTGGCACGGAGC---G  
CAGCGTCCCCTCGGCAACAGCTTGCTATCCCCGAGCAAACCGAGGAGC  
CCACTGTTGCCACCCCCCGCAGCGATGGTTTGTACCC---CTGCCAAC  
AACCGACTGGACTTTGCTGCCTCGGCATACGACGCGGCC-----GA  
TTTTGCCGGTAAACGCGGCCACCTTGCTGTCCTACGCAGCGGCCGGAGTGA  
AGGCTC-----TTCCTTTGCCGGCTGCAGGCTGCTCCAACCGGCCCTTT  
GGCTATTACGCAGACCCGTCGG---GCTGG---GGCGGACGCACGCCGCC  
GCAGTACTGTAGCGTAAACAGCAAACCGAGCTCGGTCCTTTCTGCTGGC  
CTTCTAATTCCGTCGGCGGCAGAACAGGCG---CC---AACTACCTGG--  
-----CCGAGGA---CGGA---GACGC---CATCCCGACGGAGAGATC  
CCCG---AT---CGGTGGCTCCGAGGAG---ACGAAACCCAAGGACCT--  
----GTCGGA---GTCGAGCTGGATAGAG---ACGCCGTCCTCCATTAAG  
TCAATTGATTCAAGCGATTCTGGTATCTTCG---AACAGGCCAAGAGGAG  
AAGAATCTCGCCCTCTGCCACGCCG-----GTTTCAGAAACTGTGT  
CCCCGTAAAATCTNNNCATCACTCAACAGGCGAAGTCACAGAGAGAGAAGTG  
GCGTTGGGGATAAATCCGTTTCGCGGACGGAATGGGCGCCTTCAAAAATCAA  
CCACAGCTCCCACGATATTGGCTCCGG---ACAGACGGCGTTTTCTCC  
AGGCG---CCCGCTAC---GCAGCGGCCGCCCTGGGA---CACCACCA-  
-----CCACCCGACCACGTTGGCTCT---TACTCCACGGCAGCTTTCAA  
CTCCACCCGGGACTTTCCTTTCAGAAATCGGGGTTCGGAGACGCCACCG  
G-----GGCGCAGCACAGTTTGTTCGCCCTC-----CGGA  
AGTTT---C-----GCAGGGCCACATGGACACTCAGATGCCCGGGACA  
CCTGCTCTTCCCAGGACTCCACGAG---CAAGCAGCGAGCCACGCGTCTT  
CTAATGTGGTCAACAGTCAAGTGCATGCGATTGGGCTTCTCGGGGACATGTAC  
GGTCGGGCAGACCAGTATGGCCACGTTACAAGCCCAAGGT---CCGACCA  
CTATGCTTCGACCCAGTTGCACGGCTATGGCCCCATGAACATGAATATGG  
CCGCA---CACCACGGAGCAGGGGCCCTTCTTTAGATACATGAGGCAGCCG  
ATCAAACAAGAGCTCATCTGCAAGTGGATCGAGCCGAGCAACTGACGAA  
TCCCAAAAAGTCGTGCAACAAAACCTTTTAGTACGATGCATGAGCTGGTGA  
CCCATCTGACGGTGGAGCATGTGGGGGACCAGAGCAGTCCAACCACATC  
TGCTTCTGGGAAGACTGCGCCAGAGAAGGGAAACCATTCAAAGCCAAATA  
CAAACCTGTGAATCATATCAGAGTACACACCCGGAGAGAAACCTTCCCAT  
GTCCGTTTCCCGGGTGTGGCAA

>Anoplogaster cornuta

AGTTTGCTCATCCGTGCCGAACCTTAGCCAACCCGGGGCACTCCTCGGGGA  
CGACCAGATTTATAATGTTATTGTTACAGCACATGCCTTTGTAATAATTT  
TCTTTATAGTAATAACAGTTATAATCGGAGGCTTTGGGAACTGACTTATT  
CCCCAATGATCGGGGCCCTGACATAGCATTTCCTCGAATAAATAATAT  
GAGTTCTGACTCCTTCCCCCTCCTTCCTACTTCTGCTGTCTCCTCCTCCG  
GAGTTGAAGCAGGGGCCGGAACCGGGTGAACCGTCTACCCGCCCTCGCA  
GGAAACCTTGCCACGCAGGAGCTTCCGTAGACCTAACCATCTTCTCCCT  
TACTTAGCGGGTATCTCCTCCATCTAGGGGCCATTAACCTTTATTACAA  
CTATTATTAATATGAAACCCCGAGCCATCTCCCAATACCAAACCCCTTTA  
TTTGTGTGGTCCGTTCTTATTACAGCAGTCTCCTTCTCCTCTCCCTCCC  
CGTCTTGCAGCCGGCATCACCATGCTTCTGACAGATCGTAACCTTAATA  
CAACCTTCTTTGACCCCGCAGGAGGGGTGACCCCATCCTATATCAACAC  
CTG-----  
-----  
-----  
-----

-----TTTCTAGAGAGAAACCTTCATCCATCTAACTGCCTGGG  
CATGCTGTTGCTGTCTGATGCACACCAGTGTACCAAGCTATCAGAGCTCT  
CCTGGGGCATGTGCCCTCAGCAACTTTCCAGCTATTTGCAAGACAGAGGAC  
TTCTCCAGCTGCCCAAAGACATGGTGGTGCAGCTTCTATCCCACGAGGA  
GCTGGAGACAGAAGATGAGAGACTGGTTTATGAAGCTACCCTTAACTGGG  
TCAACTATGACCTGGAAAGGAGGCAC TGCCATCTGCCAGAGCTGCTGAGA  
ACGGTTCGCCTGGCCCTGCTACCTGCCATCTTCTCATGGAGAATGTCTC  
TACAGAAGAACTGATCAATGCCAGGCCAAGAGCAAGGAGCTGGTGGATG  
AGGCCATTTCGCTGCAAGCTGAAGATCTTGCAGAATGATGGTGTGGTTAAC  
AGCCCCGTGTGCTCGGCCGAGAAAAACCAGCCATGCCCTTTTTCTGTTGGG  
AGGGCAGACCTTCATGTGTGACAAGCTGTACCTGGTGGACCAGAAGGCAA  
AAGAGATCATCCCCAAGGCTGACATCCCCAGCCCTAGGAAGGAGTTCAGT  
GCCTGCGCCATCGGCTGTAAGGTCTACATCACCCGGTGGCA--GAGGCTC-  
AGAAAACGGTGTGTCTAAAGATGTATGGGTCTATGACACCGTCCATGAGG  
AATGGTCCAAGGCGGCACCTATGCTCATTGCCAGATTTGGCCACGGCTCT  
GCTGAGCTGAAACACTGCCTTTACGTAGTAGGAGGTCACACGGCAGCAAC  
TGGCTGCCTCCCAGCCTCTCCCTCCGGATGAATACATTTGTAGTGTTCAGC  
CGTTCAACAACAAGGCTGATTCTGAACGAAGCGGAGCTAATCATGAGGCT  
GGCCAGGAATTTTCAGATGAGAGTGGTTACGGTCTCCCTGGAGGAACAAA  
CTTTCCCCAGCATCGTCCAGATGATCAGTGGGGCTCCRTGTTAGTCAGC  
ATGCATGGAGCTCAGCTTGTACCTCACTCTTCTCCCCAGAGGAGCTGC  
TGTAGTGGAGCTGTTCCCTTATGCTGTCAACCCAGAACAGTACACCCCAT  
ATAAAAACCTCGCCTCCCTACCAGGCATGGACCTTCATTATGTTTCCTGG  
AGGAACACTATAGAGGAGAACACTGTCACCCACCCAGACAGACCCCTGGGA  
AGAAGGAGGCATCGCCATTTGGAAAAGGACGAGCAAGAGCGAATACTGG  
CCAGCAAGGATGTCCCCAGACACCTGTGCTGCCGCAACCCAGAGTGGCTC  
TTCCGAATCTACCAGGACACTTTGGTGGACATCCCTTCATTSTGAGGT  
CCTCAA---AGAGGGCCTGAAG---ACCAGGCCAGCTTGAAGAA---GG  
CCAAGCTGGCCAGCACGGTTCATCCAGGCCGGGTCAGAGAACCCCAAGTGC  
CACACCTCAGTCCAAGCCACCAACGAGGCTAAACTCCTGGTTTTCTGGCA  
GATACCATGGAATCTGAAATACCTGAAGGTGAGAGAAGTGAAGTACGAGG  
TG-----AAGAAGGATAACCAGCAAGGGGACACTGGAGGATCAAATC  
ATCCAGGCAAACCCCTGC ACTGGAGGCTTTTGGTAACGCCAAAACACTGAG  
GAATGACAACCTCATCCCGTTTTGGAAAATTCATCCGAATTCACTTCGGAA  
CCAGTGGCAAGCTGTCTCTGCTGATATTGAAACGTACCTATTGGAGAAG  
TCACGTGTCACCTTCAGCTCAAGGCTGAGAGGAAC TATCACATCTTCTT  
CCAGATATTGTCCAATCACAAGCCAGAGCTGTTGGACATGATGTTGCTCA  
CTAACAACCCATATGACTACTCCTTCATCTCCCAAGGAGAGGTAACAGTA  
GCATCCATCAATGACGCAGAGGAAC TGATAGCCACTGACAGCGCCTTTGA  
CGTGCTTGGCTTTACTCAAGAGGAGAAGATGGGAGTATATAAGCTGATTG  
GTGCAATTATGCACTATGGCAACATGAGGTTTAAGCAGAAGCAGCGTGAG  
GAGCAGGCTGAGCCTGACGGAACAGAGGCTGCTGATAAGTCAGCTTACCT  
TATGGGGCTGAACTCTGCAGACCTCATCAAAGGGCTATGCCATCCCAGAG  
TCAAAGGTAGGAAATGAATATGTCACCAAAGGCCAAGGTGTAGACCAAGTC  
TACTACCCCAACAAGGAGGCCTTCAAGTGCAGGAGTGTGGCAAGCACTA  
CAACACCAAGCTGGGATACAAACGCCATGTGGCCATGCACTCTGCCACCG  
CGGGCGACCTCACCTGCAAAGTGTGCATGCAGAGCTACGAGAGCACGCCG  
GTGCTSCTGGAGCACCTCAAGAGCCACTCGGGGAAGTCCTCNGGCGGCGCC  
AAGGAGAAGAAACACCCGTGCGACCACTGCGACCGCCGCTTCTACACGCG  
GAAGGACGTGAGGCGGCACATGGTGGTCCACACGGGCCGGAAGGACTTCC  
TGTGCCAGTACTGTGCCAGCGCTTCGGCAGGAAGGACCACCTGACGCGC  
CACGTGAAGAAGAGCCACTCGCAGGAGCTGCTGAAGATCAAGACGGAGCC  
TCCGGACATGTTGGGGCTTTTAGGTTCTGGCTCGCCGCCGTGCTCTGTCA

AGGAGGAGCTCAGCCCCATGATGTGCAGCATGGGTCCCAACAAAGACCCC  
ATGATGGGCAAACCCCTTCCMCAGYGGGACCCCTTCCCCATGGGCATGTA  
CAACCCACCAC-----CTCCAGGCCATGTCCAACCTCTGGGGTGGGTC  
ACCC-----CACCCCTCCCTGATGCCAGCTCCCTGTCTGCAGCTATG  
GGCATGGGCTGCCACATGGAGNNNNNNNNNNNNNNNNNNNNNNNNNNNNNNNTGTTTACAGATCAGTG  
ATGGCTCAAACAT

TGTGAACTTGCTGGCTAGTAACTCTCCGAGCGTTTCATATGCTCTGACCC  
AGCAGAAATACTTCAGTAACTACAGTCCCCTGATTGGRTTTTACATTTAC  
GAGCCCATTTGAGTACTGGAACCTCCACGGTGCAGGAGCACCTGAAGACACT  
GAGTCATGGCTTCAACAAGATCTCCTGGATGGACAACCTTCTTCCACTACC  
TGCGGGTGGTGAACGTGAGCGCGTCGACCAAGAGCGACTTCATCACCATC  
CTCAAGGGCTCCTTCTGCGCAGCCAGAGTACCAGCACTTCACTGAGGA  
CATCATCTTCTCCAAGA--ACCGTGAGAGTG-----ATGAGTACGACA  
TTATYGCCTCGCGCATGTACCTGGTGGCGCGACCACAGAGAAGAAGCGC  
GAGGAGGTGGTGGAGCTTCTGGAGAAGCTGCGTCCGCTGATGCTGATCAA  
CAGCATCAAGTTCATCGCCTTCAACCCACCTTTGTTTTTCATGGACCGCT  
ACAGCTCCTCGGTTCATCTCACCCATCCTGACCTCAGGCTTCAGCGTGCTC  
ACCATCCTCATCCTCACTTTCTTCTGTCATCAACCCCTTGGNNNNNNNNNNNNNNNNNNNNNNNNNNNNNN  
NNNNNNNNNNNNNNNNNNNNNNNNNNNNNNNNNNNNNNNNNNNNNNNNNNNNNNNNNNNNNNNNNNNN  
NNNNNNNNNNNNNTGCCATG

TGGGCATTATTAATGGGCTCTCTGGGTGGGCTGCCCTGGTGGATGACTCC  
CCGGCTGACACCATTGTCTCGACGGTTTCGCTACGACGTGGCCCTGGTATC  
AGCATTAAAGGATCTGGAGGAGCACATAATGGAGGGACTGAAAGACTGTG  
GGCTGGAAGACAGCTCTTGACCTCAGGCTTCAGTGTATGATCAAGGAA  
TCTTGTGACGGCATGGGAGATGTCAGCGAGAAGCACGGGGGAGGGCCGGT  
GGTCCCCGAGAAGGCTGTACGCTTCTCTATTACTGTTATGTCTGTCTCTG  
TCCTGGCAGATGGAGAGGAA-----  
GAGGCGGTTACCATCTTCAGCGAGCCAAAGCCCAACTCAGAAGTGTCCCTG  
TAAGCCCCTAAGCCTGATGTTTTGTGGATGAGTCAGACCATGAGACAGTCA  
CTGCTATCCTGGGACCTTTAGTTGCAGAGCGTAACGCAATGAAGCAGAGC  
CAACTCATCCTATCTATGGGTGGCCTCCCTCGCTCCTTCCGCTTCCACTT  
CAGAGCCACGGGATWTGATGAGAAGATGGTGCCTGACATGGAGGGCCTGG  
AGGCCTCAGGTTCCGCTTATGTCTGCACTCTGTGTGATTCCAGTAGAGCA  
GAAGCCTCTCACAACATGACGCTGCACCTCCATCACACGCAACCACGATGA  
GAACCTGGAGCGTTATGAAATATGGAGGAGCAATCCCTTTTCTGAGTCTG  
TTGAGGAGCTGCGAGACCGGGTCAAAGGGATCTCTGCCAAGCCCTTTATG  
GAGACCCAGCCCCTATCGATGCATTACACTGTGACATTTGGTAATGCCAC  
AGAGTCTAYAAAATCTTCCAGGATGAGATTGGGGAGGTGTACCGGAAGG  
C---CAAC---CCCACCCGGGAGGAACGGCGGAGCTGGCGAGCAGCCCTG  
GACAAGCACCTGAGGAAGAAGATGAAGCTTAAACCAGTGTGAGGATGAA  
TGGGAACATATGCCCGGAGGCTAATGACCCAGGAGGCTGTGGAGGTGGTGT  
GTGAGCTGGTACCCTCAGAAGAGAGGGCGAAAGGCCCTGACGGAGCTTATG  
GGGCTCTACATCCAGNNNNNNNNNNNNNNNNNNNNNNNNNNNNNNNNNNNNNNNNNNNNNNNNNNNNNN  
NNNNNNNNNNNNNNNNNNNNNNNNNNNNNNNNNNNNNNNNNNNNNNNNNNNNNNNNNNNNNNNNNN  
NNNNNNNNNNNNNNNNNNNNNNNNNNNNNNNNNNNNNNNNNNNNNNNNNNNNNNNNNNNNNNNNNN  
NNNNNNNNNNNNNNNNNNNNNNNNNNNNNNNNNNNNNNNNNNNNNNNNNNNTCGTACACCATTGAGATGGCTCCAAAGGGGC  
CCCA

GTGGAAGGAGAGTCTCAGCCTTCTCCTGCTCCATTGAAGACCCACAA  
AACAGACCAAGTTCAAAGGCATCAAGACCTACATTTTCGTACCGGGTCACA  
CCGAGCCACACAGGGCGTCCGGTCTACAGACGCTACAAACACTTTGACTG  
GCTGTACAACCGCTTGCTGCACAAGTTCAGTGTGATCTCGGTGCCCCACC  
TGCCGGAGAAGCAGGCCACGGGGCGCTTCGAGGAGGACTTCATCGAGAAG  
CGAAAAGACGWCTGATYCTGTGGATGAACCACATGACCAGTCACCCGGT

CCTCTCCCAGTACGAGGGATTTGAGCACTTCTTTATGTGTGCTGACGACA  
AGCAGTGGAAAGCTGGGCAAGAGGCGGGCGGAGAAGGACGAGATGGTGGGC  
GCCACTTCATGCTGACCTTCCAGATTCCTAACGAGCATCAGGACCTCCA  
GGATGTGGAGGAGCGGGTTGACTCCTTCAAGTCTTTGCTAAGAAAATGG  
ACGACAGCGTCATGCAGCTCACACATGTTGCCTCGGAGCTGGTGCCTAAG  
CACCTGGGTGGATTGAGGAGGAGTTCCAGCGGCTAGGAAACGCCTTCCA  
GTCCATCAGCCAGGCATTCATGCTGGAACCTCCCCACAGCTCCGATGCCC  
TCAACAACGCCATCTCCCACNTCTCTCGCACGTTCCTCAAAGTACCTCGC  
TGGGTTCATCATTGGCGTGGGGTGGTGGGAACCTCCTGATCTCCATC  
CTGCTGGTCAAAGACAAGAGCCTGCACCGTGTGCCCTACTACTTCTGCT  
GGACCTGTGCGCTGACATCCTGCGCTCTGCCATCTGCTTCCCTTTG  
TCTTCACCTCTGTCAAGAATGGATCCGCCTGGACCTATGGCACGCTCACC  
TGCAAAGTGATCGCTTCTCGGGCGTCTCTCTGTTTCCACACGGCGTT  
CATGCTATTCTGTGTCAGTGTCACTCGCTACCTGGCGATTGCGCATCACC  
GCTTCTACACCAAGAGGCTGACCTTCTGGACCTGTCTAGCTGTCTATCTGC  
ATGGTGTGGACGTTGTCAGTAGCCATGGCTTTCCCCCCTGTGCTGGACGT  
AGGGACGTACTCCTTCATCCGGGAGGAGGACCAGTGCACATTCCAGCACC  
GTTCTTTCAGGGCCAATGACTCACTGGGCTTCATGCTCCTGCTGGCACTC  
ATCCTCCTGGCCACACAGCTGGTTTACCTCAAGCTCATCTTCTTTGTCCA  
CGACCGTCCGGAAGATGAAGCCCCTCCAGTTTCTGTGCCCGCCGTCAGCCAGA  
ACTGGACCTTCCATGGGCCGGGAGCCAGTGGGACGCGCGGCTAACTGG  
CTCGCTGGATTTGGGAGAGGCCCCACCCCGCCTACCTTGCTGGGCATCCG  
GCAGAACAGCAACCGGCGAGGCCGAGGCGTCTGCTGGTGTGGATGAGT  
TCAAAACAGAGAAGCGGATTAGTAGGATGTTCTACATCATGACGTTTTTC  
TTCTTGGCGTTGTGGGGCCCTATCTGGTAGCCTGCTACTGGCGGGTGT  
CGCAAGGGGGCCCCGTTAGTCCCCGGGGCTACCTGACGGCAGCCGTTGGA  
TGAGCTTTGCCAGGCTGGGGTCAATCCCTTCATCTGCATCTTCTCGAAC  
AGGGAG-----

-----  
-----  
-----  
-----  
-----  
-----  
-----  
-----  
-----  
-----  
-----  
-----  
-----  
-----  
-----  
-----  
-----  
-----  
-----  
-----  
-----  
-----  
-----  
-----  
-----

-----  
NNNNNNNNNNNNNNNNNNNNNNNNNNNNNNNNNNNNNNNNNNNNNNNNNNNNNNNNNNNNNNNNNNNNNNNNNNNNNNNNNNNNNNNNNNNNNNNN  
NNNNNNNNNNNNNNNNNNNNNNNNNNNNNNNNNNNNNNNNNNNNNNNNNNNNNNNNNNNNNNNNNNNNNNNNNNNNNNNNNNNNNNNNNNNNNN  
T---CCCAGGCTAC---GCAGCGGCCGCCCCTGGGA---CACCATCA-----  
-CCACCCGACCCACGTCGGCTCTGCCACTCCACGGGCGGCTTTCAACTCC  
ACGCGGGACTTTTCTTCCGAAATCGGGGTTTTCGGAGACGCCGCCGG---  
-----GGCGCAGCACAGCTTGTTCGCCTC-----CGGGAGTT  
T---C-----GCAGGGCCACATGGGCACTCTGATGCGGCGGGGCACCTG  
CTCTTCCCggggTCCACGAG---CAAGCGGCGAGCCACGCGTCTTCCA  
CGTGGTCAACAGCCAGATGCGACTGGGCTTCTCGGGGGACATGTACGGTC  
GGGAGATCAGTACGGCCACGTTACAAGCCCCGAGGT---CCGACCACTAT  
GCTTCGACCCAGTTGCACGGCTATGGTCCCATGAACATGAATATGGCCGC

A---CACCATGGAGCAGGGGCCTTCTTTTCGATACATGAGGCAGCCGATCA  
AGCAAGAGCTCATCTGCAAGTGGATCGAGCCGGAGCAGCTGTCGAACCCC  
AAAAAGTCGTGCAACAAAACCTTTTAGCACGATGCACGAGCTGGTGACCCA  
TCTGACGGTGGAGCATGTGGGGGGCCAGAGCAGTCCAACCACATCTGCT  
TCTGGGAAGACTGCGCCAGAGAAGGGAAGCCGTTCAAAGCCAAATACAAA  
CTTGGAATCACATCAGGGTACACACCGGAGAAAAGCCCTTCCCCTGTGCG  
GTTTCCCAGNNNNNNNNNN

>Anotopterus pharao

AGCCTTTTAATCCGGGCAGAACTTAGCCAACCCGGGGCCCTTTTAGGGGA  
TGATCAAATTTATAATGTAATCGTCACTGCCACGCCTTCGTAATAATCT  
TCTTTATAGTAATGCCTATTATAATCGGCGGTTTCGGAAATTGATTAGTT  
CCATTAATAATCGGAGCCCCTGATATAGCCTTCCCCGAATAAATAATAT  
AAGCTTCTGACTACTCCCCCATCTTTTCTTCTTTTATTATCCTCCTCAG  
CAGTAGAAGCAGGGGCCGGCAGGGTTGAACTGTTTATCCTCCCCCTGCT  
AGTAACCTAGCACATGCTGGAGCTTCAGTTGACTTAACTATTTTTTCTCT  
TCACTTGGCAGGAATCTCTTCTATTTTAGGGGCCATTAACCTTTATTACAA  
CTATTATCAATATAAAACCTCCAGCTATTACACAGTATCAAACCCCTTTA  
TTCGCTGATCAGTCTTAATTAAGTACTGAGTACTTCTACTTCTTGCCTCCC  
TGTTTTAGCAGCAGGAATTAATACTTACTGACAGACCGAAATTTAAATA  
CCACCTTTTTTTGACCAGCAGGTGGAGGAGACCCGATTCTTTATCAACAC  
TTANNNNNNNNNNNNNNNNNNNNNNNNNNNNNNNNNNNNNNNNNNNNNNNNNNN  
NNNNNNNNNNNNNNNNNNNNNNNNNNNNNNNNNNNNNNNNNNNNNNNNNNNNNN  
NNNNNNNNNNNNNNNNNNNNNNNNNNNNNNNNNNNNNNNNNNNNNNNNNNNNNN  
NNNNNNNNNNNNNNNNNNNNNNNNNNNNNNNNNNNNNNNNNNNNNNNNNNNNNN  
NNNNNNNNNNNNNNNNNNNTCCGTCCAACCTGCCTTGGCATGCTGCTGCTGCTGCGGATGCCACCAGT  
GCACCAAGCTGTCAGAGCTGTCTGGGGTATGTGCCTCAGCAACTTCCCT  
GCCATCTGCAAGACGGAGGACTTCTCCAGCTGCCCAAAGACATGGTGGT  
GCAGCTCCTGTCCCATGAAGAGCTGGAGACGGAAGATGAGCGACTGGTTT  
ATGAGGCTGCCCTTAACTGGGTCAACTATGACCTGGAGAGGAGACTGC  
CACCTACCAGAGCTGCTGAGAACCGTACGCCTGGCCTTGCTTCCCGCCAT  
CTTCTCATGGAGAAGCTCTCCACGGAGGAGCTGATCAATGCCCAGGCAA  
AGAGCAAGGAATTGGTGGACGAGGCCATCCGCTGCAAGCTGAAGATCCTG  
CAGAACGACGGCGTGGTCAACAGTCCCTGTGCCCGGCCAGAAAGACCAG  
CCATGCCCTTTTCTGCTGGGAGGGCAGACCTTCATGTGTGACAAGCTGT  
ACTTGGTAGACCAGAAGGCCAAAGAGATCATCCCCAAGGCAGACATCCCC  
AGCCCAGGAAGGAGTTACGCGCCTGCGCCATTGGCTGCAAGGTCTACGT  
CACGGGCGGGA--GAGGCTC-TGAGAACGGCGTGTCTAAAGACGTGTGGG  
TCTATGACACCGTCCACGAGGAGTGGTCCAAGGCGGCCCATGCTCATC  
GCCAGGTTTGGCCACGGCTCCGCGGAGCTCAAACACTGCCTCTATGTGGT  
CGGAGGACACACGGCAGCCACCGGCTGCCTCCCAGGCTCTCCGTCCGGAC  
GAGTACATCGTGGTGTTCAGTCCGTCCACGACGCGGCTGATTCTGAACGA  
AGCAGAGCTGATCCTGGCGCTGGCCCAGGAGTTCAGATGAGGGTGGTCA  
CCGTGTCCCTGGAGGAGCAGTCCCTTCTCGGCATTGTGCAGGCCATCAGC  
GGGGCTCCATGTTGGTCCAGCATGCACGGAGCTCAGTCTCGTACCTCGCT  
CTTCTCCCCAGAGGAGCTGCCGTGGTGGAGCTCTTCCCCTATGCCGTGA  
ACCCGGAGCAGTACACCCCGTACAAAACCCTTGCCCTCCCTGCCAGGCATG  
GACCTCCAGTACGTCTCCTGGAGGAACACTATTGAGGAGAACACCGTCTC  
CCACCCGGACAGACCCTGGGACCAAGGAGGCATCGCCCACTTGGAGAAAG  
ACGAGCAGGAGAGAACTTAGCCAGCGAGGACGTCCCAGGCACCTGTGC  
TGCCGCAACCCAGAGTGGCTCTTACAGGATCTACCAGGACACGCTGGTGA  
CATCCCCTCCTTCTGGACATCCTCAA---GGAGGGCCTGAAG---ACAA  
GGCAAACCTTGAAGAA---GTCCAAGCCGGCCAGCACGGTTCACCCGGGC  
CGGGTCCGGGAACCCAGTGCCAGACTTCCGGTTCAGCCACCAACGAGGC  
TAAGCTCACAGTGTCTGGCAGATCCCGTGGAACTCAAGTACCTGAAGG

TGCGAGA-----AAAAGGGACGCGAGCAAG  
GGAACCCTGGAGGATCAAATCATTGAGGCAAACCCCGCACTGGAGGCTTT  
CGGTAATGCCAAAACATTGAGGAACGATAATTCCCTCCCGTTTTGGAAAAT  
TCATCCGAATCCACTTTGGAACCAGTGGTAAGCTGTCTTCTGCGGACATT  
GAGACCTACCTGCTGGAGAAGTCGCGGGTCACCTTTCAGCTTAAGGCGGA  
GAGGAATTACCACATCTTCTTCCAGATTTTGTCCAATCAAAGCCGGAGC  
TGCTGGACATGCTGTTGATCACCAACAACCCCTATGACTACTGCTACATC  
TGCCAAGGAGAAGTAACCGTAGCATCCATCAACGATTCAGAAGAGCTGAT  
GGCTACCGACAGTGCCTTCGACGTTCTTGGCTTCACGCAAGAGGAGAAAC  
TGGGAGTCTACAAGTTGATAGGGGCCATTATGCACTATGGCAACATGAGG  
TTCAAGCAAAGCAGCGCGAGGAACAGGCTGAGTCAGACGGTACAGAGGC  
AGCTGATAAGTCAGCTTATCTAATGGGGCTGAATTCAGCAGACCTAATCA  
AGGGACTCTGCCATCCAGAGTCAAGGTAGGGAATGAGTATGTCACCAA  
GGCCAGGGTGTAGATCAAGTCTATTACCCCAACAAGGAGGCCTTCAAGTG  
TGAAGAGTGCGGCAAGCACTACAACACCAAGCTGGGCTACAAGCGCCATG  
TGGCCATGCACTCGGCCACGGCGGGGGACCTCACCTGCAAGGTGTGCATG  
CAGAGCTACGAGAGCACGCCGGTGTCTCTGGAGCACCTCAAGAGCCACTC  
CGGGAAGTCCCTCGGGCGGCGCAAGGAGAAGAAGCATCCATGCGACCACT  
GCGACCGCCGCTTCTACACGCGGAAGGACGTCAGGCGGCACATGGTCGTC  
CACACAGGCCGAAAGGACTTCTGTGCCAGTACTGTGCCAGCGCTTCGG  
CAGGAAGGATCACCTGACGCGGCACGTGAAGAAGAGCCACTCGCAGGAGC  
TGCTGAAGATCAAGACGGAGCCTCCGGATCTGTTGGGCTCCTGGGCTCC  
GGCTCGCCGCTTGTCTGTCAAGGAGGAGCTAAGCCCCATGATGTGCAG  
CATGGGTCCCAATAAAGACCCCATGATGGGCAAACCTTCCCCAGCGGGA  
CCCCCTTCCCATGGGCATGTACAACCCCCACCAC-----CTCCAGACC  
ATGTCTAATCCCGGGTGGGCCACCCC-----CACCCCTCCCTTATGCC  
CGGTTCCCTGTCTGCAGCTATGGGCATGGGCTGTCATATGGAATACCT-A  
TCTACGCTTCCCTTCTCCTTTCATGGGGTGTTTACAGATCAGCGACGGTTCG  
AACGTGGTGAACCTGCTGGCCAGCAACTCTCCGAGCGTCTCGTACGCGCT  
CACGCAGCAGAAGTACTTCAGCAACTACAGCCCCGTGATCGGCTTCTACA  
TCTACGAGCCCATCGAGTACTGGAACCTCACGGTGCAGGAGCACCTGCGG  
ACGCTGAGCCACGGCTTCAACAAGATCTCCTGGGTGGACAACCTTCGCCCA  
ATACCTGCGGGCGGTGAACCTGAGCGCCTCCACCAAGGCCGACTTCGTTCG  
CCGTCTCAAGGGCTCCTTCCCTGCGGAGCCCTGTATACCAGCACTTCACC  
GAGGACATCATCTTCTCCAAGA---GCCACGAGAACA-----ACGAGTA  
CGACATCATCGCCTCGCGGATGTACCTGGTGGCACGCACCACCGAGAAGC  
GGCGAGAGGACGTGGTGGAGCTGCTGGAGAAGCTCCGGCCGCTGATGCTG  
ATCAACAGCATCAAGTTCATCGCCTTCAACCCCACGTTTCGTCTTCATGGA  
CCGCTACAGCTCCTCGGTCATCTCGCCCATCCTCACGTCGGGCTTCAGCG  
TGCTCACCATCCTCATCCTCACCTTCTTCCCTGGTTCGTCACCCGCTGGGG  
AACCTGTGGCTCATCCTGACCGTCACGTCGGTGGAGCTCGGCGTTCGGG  
TCTGATGGGCTACCACACGTTTCGAGTGGCAGCCTGCCCTCAAGAATGTGT  
CTCCATCCTGCCATGTGGGTATCATCAATGGGCTTGCGGGGTGGGCCGCC  
TCGGTGGATGACGTCCTGCTGACACCATCACCCGTCGGTTTTCGTTATGA  
CGTGGCGCTGGTATCGGCCCTGAAGGACCTAGAGGAGGACATCATGGAAG  
GACTGAGTGAGCATGGGCTGGAAGACAGCGCTTGCACCTCAGGCTTCAGT  
GTTATGATCAAGGAATCCTGTGACGGCATGGGAGATGTCAGCGAGAAGCA  
CGGTGGGGGGCCAGCGATGCCTGAGAAGGCTGTGCGTTTTCTCTTTCACCG  
TCATGTCCATCTCTGTCCAGGCCGACGGAGAGGAC-----  
-----GAGGCGTTCGTTGTTTTTCAGGGAGCCAAAGCCCAA  
CTCGGAACTGTCTGTAAAGCCCCTGTGTCTGATGTTTGTGGACGAGTCAG  
ACCACGAGACACTCACTGCTGTCTTGGGCTTTGGTAGCCGAGAGGAAT  
GCAATGAAGCAAAGCCGACTCATCCTCCCAGTGGGAGACCTCCCCCGCTC



-----  
>Antennarius striatus

AGCCTACTAATCCGCGCAGAACTAAGCCAACCAGGCGCACTCTTAGGTGA  
TGATCAAATTTACAATGTTATCGTTACAGCACATGCTTTCGTTATAATTT  
TCTTTATAGTCATAACCAATTATGATCGGAGGGTTCGGCAACTGATTAATT  
CCACTAATAATTGGCGCCCTGACATAGCATTCCCTCGAATAAACAATAT  
AAGCTTCTGACTCTTACCCCATCATTTCTTCTTTATTAGCCTCATCAG  
GAGTAGAAGCTGGAGCAGGCACAGGATGAACGGTTACCCACCTCTTGCG  
GGCAACCTAGCCCATGCCGGAGCATCTGTTGATTTAACTATTTTCTCACT  
CCACCTTGCAGGTGTATCATCCATCCTAGGGGCTATTAATTTTATTACAA  
CTATTATTAATATAAAAACCACCAGCTCTTTCACAATACCAAACACCTTTA  
TTTGTATGGGCTGTATTAGTCACTGCTGTACTTCTCCTCCTTCCCTTCC  
TGTTCTTGCTGCAGGGATTACAATATTATTAAGCTGATCGAAACCTTAATA  
CAACTTCTTTGACCCCACTGGCGGAGGAGACCCCATTTCTATAACCAACAC  
TTATTCTGGTTTTTTGGCCA-----

-----  
-----TTCCTAGAGAGAAACCTTCACCCAACCAACTGCCTCGG  
GATGCTGTTGCTGTCTGATGCGCACCAGTGCACCAAGCTGTCCGAGCTGT  
CCTGGGGCATGTGCCCTCAGCAACTTCCCGCTATTTGCAAGACTGAGGAC  
TTTCTCCAAGCTGCCAAAAGATATGGTTGTGTCAGCTTTTGTACACGAAGA  
GTTAGAAACTGAAGATGAGAGACTTGTTTATGAAGCTGCCCTCAATTGGA  
TCAACTATGACCTGGAAAAGAGGCACAGCCACCTTCCAGAACTCTTGAGA



ACGGTCCGACTGGCCCTGCTGCCTGCCATCTTTCTGATGGAGAACGTCTC  
TACAGAAGAGCTGATTAATGCCAGCCCAAGAGCAAGGAACTGGTGGATG  
AAGCTATCCGTTGTAAGCTGAAGATCTTGCAGAATGATGGTGTGTTAAC  
AGCCCATGCGCTCGACCAAGAAAAACCAGCCATGCTCTTTTTCTCTGGG  
TGGTCAGACATTCATGTGTGATAAGTTGTATCTGGTAGACCAGAAAGCCA  
AAGAGATCATCCCCAAAGCTGACATTTCCAGCCCCAGGAAGGAGTTCAGC  
GCCTGCGCCATCGGCTGTAAGGTGTACATCACTGGAGGAA--GAGGTTT-  
CGAGAACGGAGTGTCCAAAGATGTATGGGTCTACGATACAGTTCATGAGG  
AATGGTCCAAGGCGGCCATGCTCATTGCCAGGTTTGGCCATGGCTCT  
GCAGAGCTTAAACACTGCCTCTATGTGGTAGGAGGTCACACTGCAGCAAC  
CGGCTGCCTCCCAGCNNNNNNNNNGGATGAGTACATTGTTGTGTTTCAGTCCGGTCAACAA  
CAAGACTGATTCTGAATGAAGCAGAGCTAATTATGGCATTGGCCCAGGAG  
TTTCAAATGAGAGTGGTGACATTGTCCCTGGAGGAACAGTCTTTCTCTAG  
TATTGTCCAGATGATCAGCAGTGTACCATATTAGTGAGTATGCATGGAG  
CTCAACTCATTACCTCACTCTTCTTACCTAGAGGATCTGTTGTGGTGGAG  
TTGTTCCCTTATGCTGTGAACCCAGAACAGTACACCCCATATAAAAACCT  
TGCTCCCTTCCAGGCATGGACCTTCATTATATTTTCATGGAGGAACAATA  
ACGAGGACAACAGCATCACCCACCCAGACAGACCTGGGAACAAGGGGGT  
ATTGCTCATTGGAAGAGGAGCAAGAACGTATAAAGATGAGYAAAGA  
CGTCCCAGGCATCTATGCTGCCGCAACCCAGAGTGGCTCTTCAGGATCT  
ACCAGGACACTTTGGTGGACATCCCCCTCTTCTGGAAGTTCTCAA---A  
GATGGCATGAAG---ACAAAGCCCAGCCTGAGAAA---GTCAAAGCCGTC  
TGGTACACTCCACCCGGGCAGGGTCCGAGAACCTCAGTGTCAAACCTCAG  
TTCAAACCAGCAATGAGGCTAAACTCATAGTCTCTGGCAGATACCATGG  
AATCTGAAGTACCTGAAGGTGAGAGGTTGAAATACGAGGTGTNNNNNNNNAGGAAGG  
ATGCCAACAAGGGGACCCTGGAGGATCAAATCATTTCAGGCCAACCTGCG  
TTGGAGGCCCTTTGGCAACGCAAAAACGTTGAGGAACGACAACCTCATCCCG  
TTTTGGCAAGTTCATCAGAATTCATTTTGGGACAAGCGGCAAGTTGTCTT  
CTGCGGACATTGAGACGTACCTGCTGGAGAAGTCTCGCGTCACTTTTCAG  
CTCAAGGCTGAGAGAACTATCACATCTTCTACCAGATCCTGTCCAATCA  
GAAGCCAGAGCTGCTGGACATGCTGCTGGTCACCAACAACCCCTATGACT  
ACTCCTACATCTCCAAGGAGAGGTATCCGTCCCTTCCATTAACGACTCG  
GAGGAGCTGATGGCCACCGATAGTGCCTTTGACGTACTGGGCTTCACGGC  
AGATGAGAAGATGGGTGTCTACAAGCTCACAGGAGCCATCATGCATTACG  
GCAACATGAAGTTTAAACAGAAGCAGCGTGAAGAGCAGGCAGAACCCGAC  
GGAACGGAGGCGCGGATAAATCCGCCTACCTGATGGGGCTGAACTCCGC  
TGACCTCATCAAAGGGTTGTGTACCCCAGGGTGAAGGTAGGAAACGAAT  
ACGTCACCAAAGGCCAAAGTGTGGATCAAGTCTACTACCCCAACAAGGAG  
GCCTTCAAATGTGACGAGTGTGGGAAGCACTACAACACCAAGCTGGGATT  
TAAGCGCCATGTGCCATGCACTCTGCCACGGCTGGGGACCTCACATGTA  
AAGTGTGCATGCAGACCTACGATAGCACGCCTGTGCTGCTGGAGCACCTG  
AAGAGCCACTCTGGGAAGTCTCTGTTGGCACCAAGGAGAAGAAACACCA  
GTGCGACCACTGTGATCGGCGTTTCTACACAAGGAAGGACGTGAGACGCC  
ACATGGTGGTCCACACCGGCAGGAAGGACTTCTTTGCCAGTACTGTGCC  
CAACGCTTTGGCAGGAAGGACCACCTGACGCGCCACGTGAAGAAGAGCCA  
CTCGCAGGAGCTGCTGAAGATCAAGACGGAGCCTCTGACATGTTGGGTC  
TCTTGGCTTCCGGGTCGCCCGCGTGTCTGTGAAGGAGGAGCTCAGCCCC  
ATGATGTGTGGGATGGGTCCCAACAAGGACCCCATCATGAGCAAACCTT  
TCCTAGTGGGGCCCCTTTTCCCATGGGCATGTACAACCCTCATCAC----  
--CTCCAGGCCATGTCTAATTCAGGGGTCCGGTCACTCA-----CACCCG  
TCCCTGATGCCCGGCTCCCTGTCCGCGGCCATGGGTATGGGCTGTCACAT  
GGAATACCTCATCTACGCCTTTTTTCTTCATGGGATGTTTACAAATCA  
GTGATGGATCAAATATTGTGAACCTGCTGGCAAGTAACTCTCCAAGTGT

TCATATGCTCTAACCCAGCAAAAATACTTCAGCAACTATAGTCCAGTGAT  
TGGGTTTTACATTTATGAGCCCATTGAGTACTGGAACCTCCACAGTGCAGG  
AGCACCTCAGGACTCTGAGCCAAGGCTTCATCAAGATCTCCTGGATGGAC  
AATTTTTTCCAATACCTGAAGGTGGTAAATGTGAGTGCATCAACCAAGAG  
CGACTTTATCAGCATCCTGAAGGGCTCCTTCTGCGCAGCCCAGAGTACC  
AGCACTTCACTGAGGACATCATTTTCTCAAAGA---ACCGTGAGACTG--  
----ATGAGTACGACATTATCGCCTCTCGGATGTACTTGGTAGCACGGAC  
TACAGACAAGAAACGTGAAGAAGTGATGGTGCTTCTGGAAAACTTCGTC  
CCCTGATGTTGATCAACAGCATCAAATTCATAGCCTTCAATCCTACATTT  
GTGTTTATGAGCCGCTACAGCTCCTCGGTCATCTCACCCATCCTGACCTC  
AGGATTCAGCGTACTCACAATCCTCATCCTCACTTTCTTCTGGTCATCA  
ACCCCTTGGGTAATTTTTGGCTCATTTCTCACTGTAACATCTGTGGAGCTG  
GGAGTGCTGGGNNNNNNNGGCTTTCACCAGTTTGAATGGCAGCCAGCTCTCAAGAAT  
GTGTCAACATCTTGCAGTGTTGGCATTATTAATGGTCTCTCTGGATGGGA  
TTCTCAGTGGATGAGTCCCCAGTTGACACCATCACTCGTCCGTTTCGCT  
ATGATGTGGCACTGGTATCAGCATTAAGGATCTGGAGGAGGACATCATA  
GAGGGACTGAGAGAGAATGGAATGGAAGACAGCACTTGCC-----ACTT  
TACTGTGATGATCAAAGAGTCTGTGATGGTATGGGTGATGTCAGTGAAA  
AACATGGCGGAGGACCGGCTGTCCCTGAGAAGGCTGTGCGTTTCTCTTTC  
ACCGTCATGTCTGTGCTTTTTCAGAAAAGACAGCAAGGAG-----  
-----GAAGAGTCCACATCTTCACAGAACCAAAGC  
CAAATTCAGAACTGTCTGTAAGCCCTTTGCCTGATGTTTGTGGATGAA  
TCAGACCATGAGACACTCACAGCAATCCTGCATCCTATAATTGCAGAGCG  
TAATGCAATGAAAGAGAGCAGATTAATCCTATCCATTGGTGGACTTCCAC  
GATCCTTCAGCTTTCATTTTAGGGGCACGGGATATGATGAGAAGATGGTT  
CGTGAGATGGAAGCCCTTGAGGCCCTCTGGGTCTGCCTACATTTGCACCCT  
CTGTGATGCCAGTCTGTCAGAGGCCCTCTGAAAACATGGTGTACATTGTA  
TCACCCGCAGTCATGAAGAGAATCTTGAGTGTTATGAAATTTGGAGAACC  
AATCCATTTTCTGAGTCTGTAGAGGAGTTGCGAGATAGAGTCAAAGGGGT  
CTCTGCCAAGCCCTTCATGGAGACCCATCCACGATGGATGCATTACACT  
GTGACATTGGCAATGCCACTGAGTTCACAAAATATTCOAAGATGAGATT  
GGGGAGGTGTACCAAAGGT---CAAT---CCCAGCCGGGATGAGAGGCG  
TAGCTGGAGGGCAGCCCTAGATAAACAGCTGAGAAAAGAAGATGAAGCTTA  
AACCAGTAATGAGGATGAATGGGAACATATGCCCGCAGGCTAATGACCCTG  
GAGGCTTTGGAGGTGGTGTGTGAGCTGGTGCCCTCAGAGGAGAGAAGGGA  
GGCCCTTAGGGAACATAATGAGACTCTACATTCAGATGAAGCCCGTGTGGC  
GCGCCACCTGCCAGCCAAAGAGTGCCCTGACCAGCTGTGCCGATACAGC  
TTCAACTCCCAGAGCTTTGCAGAGGTCTCTCCTCTAAGTTCAAATATAG  
GTACAATGGGAAGATAACCAATTACTTGCACAAGACTTTGGCTCATGTGC  
CTGAAATCATAGACAGAGATGGATCCATAGGGGCTTGGGCCAGTGAAGGG  
AATGAGTCAGCAAACAAATCCTACACCATTGAGATGGGTCCGCTGGGCCC  
CGGATGGAAGGAGAGCCCACAGCCGTTCTCCTGCTCCATCGAAGACCCCA  
CCAAACAGACGAAGTTCAAGGGCATCAAGACGTACATCTCGTACCGCGTG  
ACGCCGAGCCACACCGGGCGTCCCCTTACCAGGCGCTACAAACACTTCGA  
CTGGCTGTACAACCGCTCCTGCACAAGTTCACTGTGATCTCCGTGCCCC  
ACCTGCCTGAGAAGCAGGCCACGGGCCGATTCGAGGAAGACTTCATCGAG  
AAACGCAAGAGACGACTGATCCTGTGGATGAACCACATGACCAGCCACCC  
CGTCTCTCCCAGTACGAAGGTTTCGAACACTTCTGATGTGCGCCGACG  
ACAAGCAGTGGAACTGGGGAAGAGACGGGCCGAAAAGATGAGATGGTG  
GGCGCCACTTCATGCTGACCCTCCAGATCCCCAACGAGCACCAGGACCT  
TCAGGACGTGGAGGAGCGGATCGACACCTTCAAGTCTTCGCCAAGAAGA  
TGGACGACAGCGTGATGCAGCTCACGCATGTTGCGTCGGAGTTGGTGCGG  
AAACACCTGGGCGGGTTCAGGAAGGAGTTCAGCGTTCGGGGAACCTCCTT



CCCGGCTGTGGCAA

>Antigonia capros

AGCTTACTTATCCGAGCTGAACTAAGCCAACCTGGGGCACTCCTAGGAGA  
TGACCAAATCTACAATGTTGTAGTTACAGCACATGCCTTTGTAATAATTT  
TCTTTATAGTAATAACCAATTATAATTGGAGGATTTGGAACTGACTAATT  
CCTTTAATGATTGGAGCCCCGATATAGCATTCCCCGAATGAACAATAT  
GAGCTTCTGACTACTTCCACCCTCTTTTTTACTTCTCCTTGCCCTTTCTA  
TAGTAGAAGCAGGGGCGGGCACTGGATGAACAGTTTACCCCCCTCTAGCT  
GGGAACCTGGCCCATGCCGGGGCATCAGTTGACTTAACAATTTTTTCTCT  
CCACTTAGCAGGGATTTCTCAATCCTTGGGGCCATCAACTTTATCACAA  
CTATTATTAATATGAAACCTCCCGCTATTTCCCAGTACCAAACCTCCCCTG  
TTTGTGGAGCAGTACTAATTACTGCAGTTCTTCTTCTCCTCTCCCCTCC  
CGTCTTGCTGCCGAATTACAATACTTCTTACAGACCAGAACTTGAACA  
CCACCTTCTTTGACCAGCCGAGGAGGAGACCCGATTCTTTATCAACAT  
CTATTCTGATTTTTTGGGCACCCTGAAGTTTACATCCTGATTCTTCCGGG  
CTTTTGGAAATAATTTCTCATATTTGTTGCCTACTACTCAGGTAAAAAAGAAC  
CATTCGGCTATATAGGCATAGTTTGAGCCATAATGGCTATTGGACTCTTG  
GGCTTCATCGTGTGAGCCATCATATGTTTACTGTAGGAATGGACGTAGA  
CACACGAGCTTATTCCCTAGAGAGAAACCTTACCCATCTAATTGCCCTTGG  
CATGCTTTTTGCTGTCCGATGCCACCAGTGACCAAGCTGTCAGAGCTCT  
CCTGGGGCATGTGCTCAGCAACTTTCCCGCTATTTGCAAGACAGAGGAC  
TTCCCTCAACTGCCCAAAGATATGGTGGTGCAGCTTTTGTACACAGAGGA  
GCTAGAGACTGAAGATGAGAGACTGGTTTATGAAGCTGCCCTCAATTGGA  
TCAACTATGATCTGGAAAAGAGGCACCTGCCACCTTCCAGAACTCCTGAGA  
ACGGTCCGTCTGGCCCTGCTGCCTGCCATCTTCTCATGGAGAATGTTTC  
TACAGAAGAGCTGATCAATGCCAGGCGAAGAGCAAGGAGCTGGTGGATG  
AAGCTATCCGCTGCAAGCTGAAGATCCTGCAGAATGATGGTGTGCTTAAC  
AGCCCATGTGCTCGACCAAGAAAACCAGCCATGCCCTCTTTCTGCTGGG  
TGGGCAGACTTTCATGTGTGACAAAATTTGTACCTGGTGGACCAGAAGGCCA  
AAGAAATCATCCCCAAGGCTGACATTTCCAGCCCCAGGAAGGAGTTCAGC  
GCCTGTGCCATCGGCTGTAAGGTGTATATCACTGGTGGGA--GAGGCTC-  
AGAGAATGGGGTGTCTAAAGATGTATGGGTCTACGACACCGTCCACGAGG  
AATGGTCAAAGGCGGCACCCATGATCATTGCCAGGTTTGACCTAGGCTCT  
GCNNNNNNNNNNNNNNNNNNNNNNNNNNNNNNNNNNNNNNNNNNNNNNNNNNNNNNNNNNNNNN  
NNNNNGGATGAATATATTGTTGTGTGTTAGTTCGTCAACAACGAGACTGATACT  
GAATGAAGCGGAGTTCATCATGGCGCTGGCTCAGGAGTTCCAGATGAGAG  
TGGTCACAGTATCCCTGGAGGAGCAGTCTTTCCCAGTATCGTCCAGGTG  
ATCAGCGGTGCACCATGTTAGTCAGTATGCATGGAGCTCAGCTCADCAC  
CTCACTCTTCTGCCAGGGGAGCTGCTGTGGTGGAGCTGTTCCCTTTG  
CTGTGAACCCAGAGCAGTACCCCCATATAAGACTCTCGCTCCCTTCCA  
GGAATGGACCTTACTATATCTCCTGGAGGAACACCAAGGAGGAGAACAC  
CATCACATACCCAGACAGACCCCTGGGAACAAGGGGGTATTGCTCACTTGG  
ATAAGGAGGAGCAAGAGCGAATACTGGCGAGCAAAGATGTCCCAGGCAT  
CTGTGCTGCCGCAACCCGGAGTGGCTCTTCCGGATCTACCAGGACACTTT  
GGTGGATATCCCCTCTTTCCTGGAAAGTCTCAA---AGAGGGCATGAAG-  
--ACAAAGCCC GGCTGAAGAA---GTCTAAGCCGGCCAGCACGCTCCAC  
CCGGGCCGGGTGAGAGAACTCAGTGTACAGACCTCAGTACAAACACTAA  
CGAGGCTAAACTCACAGTCTTGGCAGATCCCGTGGAAATCTGAAATACC  
TGAAGGTCAGAGAGGTCAAATACGAGGTG-----AAAAGGGACACC  
AGCAAGGGGACACTGGAGGATCAAAATCATCCAGGCGAACCTGCGCTGGA  
GGCTTCCGTAACGCCAAAACACTGAGAAATGACAACTCGTCTCGCTTTG  
GAAAATTCATCCGAATTCACTTTGGTACGAGCGGGAAGCTGTCAATCCGCT  
GACATTTGAAACGTACCTGTTGGAGAAGTACGCGTCACCTTTTCACTGAA

GTCTGAGAGAACTACCACATCTTCTTCCAGATCCTGTCCAACCAGAAGC  
CAGAGCTGCTGGACATGCTGCTGATCACCAACAACCCATACGACTACTCC  
TACATCTCCCAAGGAGAGGTAACGGTCGCTTCCATCAACGACTCCGAGGA  
GCTGATGGCCACGGACAGCGCCTTTGATGTGCTCGGCTTCACTGCAGACG  
AGAAGATGGGCGTCTATAAACTGACAGGCGCCATCATGCACTACGGCAAC  
ATGAGGTTCAAACAGAAGCAGCGCGAGGAGCAGGCGGAGCCGGATGGGAC  
GGAGGCTGCTGATAAAATCAGCATACTAATGGGGCTGAACTCTGCTGACC  
TCATCAAAGGGCTATGCCATCCCAGAGTCAAGGTAGGAAATGAATACGTC  
ACCAAAGGCCAAAGTGTGGACCAAGTCTACTATCCCAACAAGGAGGCCTT  
CAAGTGTGAGGAGTGTGGGAAGCACTACAACACCAAGCTGGGTTACAAGC  
GCCATGTGGCCATGCACTCGGCCACGGCAGGGGATCTCACCTGTAAAGTG  
TGCATGCAGACCTATGAGAGCACGCCGTGTGCTCTTGGAGCACCTCAAGAG  
CCATTCGGGAAGTCTTCAGGTGGCACCAAGGAGAAAAAGCACCCGTGCG  
ACCCTGTGACCGTCGTTTCTACACAAGGAAGGATGTGAGACGGCACATG  
GTCGTCCACACGGGCCGAAAGGACTTCCTGTGCCAGTACTGTGCCCAACG  
CTTTGGCAGGAAGGACCACCTGACACGCCATGTGAAGAAGAGCCACTCAC  
AGGAGCTGCTGAAAATCAAGACGGAGCCGCCTGATATGTTAGGTCTTTTA  
GCTTCTGGGTACCACCTTGCTCTGTGAAGGAAGAGCTCAGCCCCATGAT  
GTGCGGCATGGGTCCCAACAAAGACCCCATGATGGGCAAACCGTTCCCA  
GCGGTGCCCTTTTCCAATGGGCATGTACAACCCCCACCAT-----CTC  
CAGGCCATGTCTAATTCTGGGGTGGGTACCCA-----CACCCGTCCCT  
GATGCCAGTTCCTTGTCTGCAGCTATGGGCATGGGCTGTCACATGGAAT  
ATCTCATCTATGCCTCTTTCTCATTCATGGGATGTTTACAAATCAGTGAT  
GGATCAAATATCGTGAACCTGCTGACTAGTAACTCTCCAAGTGTTCGTA  
TGCTCTTACCAACAAAAATACTTCAGTAACTACAGTCCAGTGATTGGGT  
TCTACATTTATGAGCCCATCGAGTACTGGAACCTCCACAGTGCAGGAGCAC  
CTGAAGACTCTGAGTCATGGCTTCAACAAGATCTCCTGGATGGACAACCT  
CTTCCACTACCTGCGGGTGGTGAATGTGAGTGCCTCAACCAAGAGCGACT  
TCATCACCATCCTCAAGGCCTCCTTCTGCACAGCCCGGAGTACCAGCAC  
TTCCTGAGGACATCATATTCACAAAGA---ACCGTGACACTG-----A  
TGAGTATGACATTATCGCCTCACGGATGTACTTGGTGGCACGGACGACAG  
AGAAGAAGCGCGAAGAGGTGGTGGAGCTTCTGGAAAAGCTTCGTCCGTTG  
ATGCTGATCAACAGCATCAAGTTCATTGCCTTCAATCCTACGTTTGTGTT  
CATGGACCGCTACAGTTCCTCTGTCTATCTCGCCCATCCTGACCTCAGGAT  
TCAGCGTACTCACAATCCTCATCCTCACTTTTTTCTGCTCATCAACCC  
TTGGGTAACCTTCTGGCTCATCCTCACTGTAACGTCCGTGGAGCTGGGCGT  
CTTGGGGTTGANNNNNNNNNNNNNNNNNNNNNNNNNNNNNNNNNNNNNNNT  
GTTGGCATTATTAACGGACTCTCTGGATGGGCTTCCTC  
AGTGGATGACTCCCCAGCTGACACCATCACTCGACGGTTTCGCTATGATG  
TGGCACTGGTGTGAGCATTAAGGATCTGGAGGAGGACATCATGGAGGGG  
CTGAGAGAGAGTGGGCTGGAAGACAGCGCTTGCACCTCGGGCTTCAGTGT  
CATGATCAAGGAATCTTGTGATGGCATGGGTGATGTCAGTGAGAAGCATG  
GTGGAGGACCAGCTGTTCTGAGAAGGCTGTACGTTTCTCTTTCACTGTT  
ATGTCTGTTTCTGTCTGGCAGACGATGAGGAG-----  
-----GAACGGGTTACCATCTTACAGAGGCAAAGCCAAACT  
CAGAGCTGTCCTGTAAGCCCCTATGCCTGATGTTTGTGGATGAGTCAGAT  
CATGAGACACTGACAGCCATCCTGTGGCCTGTAATTGCAGAACGTCAAGC  
AATGAAAGACAGCAGGCTAATTTTATCCATCGGTGGACTACCTCGCTCCT  
TCCGGTTTCACTTCAGAGGCACGGGATACGATGAGAAGATGGTGCCTGAG  
ATGGAGGGGCTTGGAGCCTCTGGGTCCTCCTATATCTGCACTCTTGTGA  
CTCCAGTCGAGCAGAGGCCTGTCAAAACATGGTGTACTACTCCGTCACCC  
GGAGTCATGAAGAAAATCTAGAACGCTATGAAATATGGAGAACCAACCC  
TTTTCTGAGTCTGTAGATGAGCTGCGAGACAGAGTCAAAGGGGTCTCTGC

CAAGGCCTTCATGGAGACCCATCCCACGCTGGATGCATTACACTGTGACA  
TCGGCAATGCCACTGAGTTCACAAAATCTTCCAGGACGAGATCGGGGAG  
GTGTACCAAAAGGT---CAAC---CCCAGCCGGGAGGAGCGGGCAGCTG  
GAGGGCAGCCCTAGATAAACAGCTGAGGAAGAAGATGAAGCTCAAACCGA  
TAATGAGGATGAATGGGAACCTATGCCCGCAGGCTAATGACCCAGGAGGCT  
GTGGAGGTGGTGTGTGAGCTTGTGCCCTCTGAGGAGAGGAGGGAGGCCCT  
GAGGGAGCTTATGAGGCTCTACATCCAGATGAAGCCCGTGTGGCGTGCCA  
CCTGCCAGCCAAGGAGTGCCCCGACCAGCTGTGCCGCTACAGCTTTAAC  
TCCCAACGCTTTGCTGACCTCCTCTCCTCTACCTTCAAATATAGGTACAA  
TGGAAGATAACCAATTACCTGCACAAGACCCTGGCTCATGTGCCTGAAA  
TCATAGAAAGAGATGGATCCATAGGAGCTTGGGCCAGCGAAGNNNNNNNNNNNNNNNNNNNTCTTACA  
CCATCGAGATGGGCCCCATGGGGCCCCAATGGAAGGAGAGCCACAGCCG  
TTCTCCTGTTCTATTGAAGACCCAACAAAACAAAAGTTCAAGGGCAT  
CAAGACGTACATTTTCGTACCGGGTCACGCCGAGCCACACGGGGCATCCCG  
TCTACAGGCGCTACAAACTTTGACTGGCTGTACAACCGCTTACTGCAC  
AAGTTCACCTGTGATCTCCGTGCCTCACCTGCCCGAGAAGCAGGCCACGGG  
GCGATTTGAGGAAGACTTCATCGAGAAGCGCAAGAGGGCGACTGATACTGT  
GGATGAACCATATGACCAGTCACCCGGTCTCTCCAGTACGAAGGCTTC  
GAGCACTTTCTGATGTGTGCTGACGACAAGCAGTGGAAGCTAGGCAAGAG  
GCGGGCAGAGAAGGACGAGATGGTGGGGGCCATTTTCATGCTGACCCTCC  
AGATCCCTAACGAGCACCAAGACCTTCAGGATGTTGAGGAGCGGATTGAC  
TCCTTCAAGTCCTTCGCTAAGAAAATGGATGACAGCGTGATGCAGCTCAC  
ACATGTTGCCTCGGAGCTGGTGCGCAAGCACCTGGGCGGGTTCAGGAAG  
AGTTCAGCGGCTGGGAAACGCCTTCCAGTCTATCAGCCAGGCGTTCATG  
CTGGACCCACCCACAGCTCCGAGACCCTAACAGNNNNNNNNNNNNNNN-  
NNNNNNNNNNNNNNNNNNNNNNNNNNNNNNNNNNNNNNNNNNNNNNNNNNNNNNNNNNNNNNNNNNNN  
NNNNNNNNNNNNNNNNNNNNNNNNNNNNNNNNNNNNNNNNNNNNNNNNNNNNNNNNNNNNNNNNNNNN  
NNNNNNNNNNNNNNNNNNNNNNNNNNNNNNNNNNNNNNNNNNNNNNNNNNNNNNNNNNNNNNNNNNNN  
NNNNNNNNNNNNNNNNNNNNNNNNNNNNNNNNNNNNNNNNNNNNNNNNNNNNNNNNNNNNNNNNNNNN  
NNNNNNCTTCTGTGTCAGTG  
TCACGCGCTATCTGGCCATCGCACATCACCGTTTCTACACCAAGAGGCTG  
ACCTTCTGGACCTGTCTAGCTGTCATCTGCATGGTGTGGACGTTGTCAGT  
GGCTATGGCGTTCCCGCCAGTGCTAGACGTAGGGACGTA CTCTTTTATCC  
GGGAGGAGGACCAGTGCACATTCCAGCACCGTTCTTCAGGGCGAATGAT  
TCGCTGGGCTTCATGCTCCTGCTGGCGCTCATCTCCTGGCCACACAGCT  
GGTTACCTCAAGCTCATCTTCTTCGTCACGACCCTCGAAAAATGAAGC  
CTGTCCAGTTCGTGCCTGCCGTAGCCAGA ACTGGACCTTCATGGACCA  
GGCGCCAGCGGGCAGGCGGACCAACTGACTGGCAGGATTCGGTCGACG  
CCCCACCCCGCCTACTCTGCTGGGCATCCGGCATAACAGCAACGCACCAG  
GTCGCAAGCATCTACTGGTATTGGATGAGTTCAAAACAAAGAACAGGATT  
AGTACGATGTTCTACATCATGACTTTTTCTTCTCCTGGCACTGTGGGGGCC  
CTACCTGGTCGCCTGCTACTGGCGGTGTTTCGACGGGGCCCCCGTGACCG  
CTGGGGGCTACCTGACGTCAGCCGTGGATGAGCTTTGCCAGGCTGGG  
GTCAATCCTTTTTCATCTGCATCTTCTCCAGC NNNNNNGCCAAATCTCGCTTTCACCC  
TGGCATGGGGACTGGTCCGTCAGCGGAGC---GCAGCGTCCCCTCGGCA  
ACAGCTTGCTATCCCCGACGAAACCGAGGAGCCCACTGTTGCCACCCCC  
CCGCAGCGATGGTTTGTACCC---CTGCCAACACCGACTGGACTTTGC  
TGCTCGGCATAACGACGCGCT-----GATTCGCCGGTAACGCGG  
CCACCTTGCTGTCTTACGCAGCGGCGGAGTGAAAGCTC-----TTCCC  
CTGCCGACTGCAGGCTGCTCCAACCGGCCTTGGCTATTACGCAGACCC  
GTCAG---GCTGG---GGAGGACGCACGCCCGCCGAGTACTGTGGTGTGA  
ACAGCAAACCCAGCTCGGTCTTTTCTGCTGGCCCTCTAACTCTATCGGA  
GGCAGAGCGGGCA---CC---AACTACCTGG-----CCGAGGA---



GGAGAACGGCGTCTCCAAGGACGTGTGGGTGTACGACACGGTGCACGAGG  
AGTGGTCCAAGGCGGCCCATGCTCATCGCCAGGTTCCGGCCACGGCTCG  
GCCGAGCTGAAGCACTGCCTCTACGCGGTGGGCGGCCACACCGCCGCCAC  
GGGCTGCCTCCCGCGTGCCTCTCGGGATGAATACATTGTGGTGTTCAGT  
CGTTCAACAACAAGGCTGATTCTCAATGAAGCGGAGCTAATTATGGCACT  
CGCACAAAGAGTTCAGATGAGAGTGGTCACCGTCTCCCTGGAGGAACAAC  
CTTTTGCCAGTATCGTGCAGGTGATTAGCGGAGCCAGCATGTTGGTAAGC  
ATGCATGGAGCTCAGCTGGTGCATCACTCTTCTTGCCAGAGGAGCAGC  
CGTGGTGGAGCTCTTCCCTTATGCTGTGAACCCAGAGCAGTACACGCCAT  
ATAGAACACTGGCCTCCCTACCAGGCATGGACCTTCAGTATGTTTCATGG  
AGGAACACTATGGAGGAGAACACCGTCACCCACCCAGACAGACCTTGGGA  
CCAAGGAGGCATTGCCCACTTGGAAAAGGAGGAACAAGAGCGGATACTGT  
CCAGTAAGGATGTCCCCAGGCATTTATGTTGCCGCAACCCAGAGTGGCTT  
TTCCGAATCTATCAGGACACTTTGGTAGACATCCCTTCAATCCTAGAGGT  
CCTGAA---AGAGGGCCTGAAG---ACGAGGCCTAGCTTAAAGAA---AG  
CCAGGCCGTCTAGCACCGTTCATCCTGGACGGGTGAGGGAAGTTCAGTGT  
CAGACGTCCGTCCAAGCTGCTAATGAGGCTAAACTCACAGTCTCCTGGCA  
GATCCCATGGAATCTCAAATACCTGAAGGTGAGAGAAGTGAAGTACNNNNNNNNNNNNNNNAAGA  
AGGACACCAGCAAGGGAACCTCTAGAGGATCAAATCATCCAGGCCAACCCG  
GCACTGGAGGCCTTCGGCAATGCCAAGACCGCCAGGAATGACAACCTCCTC  
CCGTTTTGGAAAATTCATTCGGATCCACTTTGGAACAAGCGGGAAGCTGT  
CATCTGCTGACATTGAAACATATCTTCTGAAAAGTCCCGGGTACCTTT  
CAGCTCAAGGCTGAGAGGAATTACCACATCTTCTTCCAGATCCTGTCCAA  
TCAGAAACCAGAGCTCCTGGAGATGCTGCTGATCACCAATAACCCGTACG  
ACTACTCCTACATTTCCAGGGAGAAGTGGCCGTCTCTCAATCAACGAT  
TCAGAGGAGCTGATGGCCACAGACAGCGCCTTCGACGTGCTTGGGTTCAC  
CGCAGAGGAGAAGATGGGCGTGTACAAGCTGACAGGCGCCATCATGCACT  
ATGGCAACATGAAGTTTAAACAACAAACAGCGGAGGAGCAGGCGGAGCCG  
GACGGCACCCGAGGCAGCGACAAGTCGGCATACTCATGGGTCTGAACTC  
TGCGGACCTCATCAAAGGCCTGTGCCATCCAGGGTCAAGGTGGGAAATG  
AGTATGTCACCAAAGGACAGGGTGTAGACCAAGTCTACTACNCCAACAAGG  
AGGCCTTCAAGTGCAGAGTGTGGCAAGCACTACAACACCAAGCTGGGA  
TACAAGCGCCATGTGGCCATGCACTCCGCCACGGCAGGGGACCTCACCTG  
TAAGGTGTGCATGCAGAGCTACGAGAGCACCCCCGTTCTCCTGGAGCACC  
TCAAGAGCCACTCGGGCAAGTCCCTCAGGCGGCCAAGGAGAAGAAGCAC  
CCGTGCGACCACTGCGACCGCCGCTTCTACACCCGCAAGGACGTCCGGCG  
GCACATGGTGGTGCACACCGGCCGAAAAGACTTCTGTGTGTCAGTACTGCG  
CCCAGCGCTTTGGCAGGAAGGACCACCTGACGCGCCACGTGAAGAAGAGC  
CACTCGCAGGAGCTGCTGAAGATCAAGACGGAGCCCCAGACATGCTGGG  
CCTGCTGGGCTCTGGCTCCCCCGTGTCTCCGTCAAGGAGGAGCTGAGTC  
CCATGATGTGCAGCATGGCCCCCAATAAAGACCCAATGATGGGCAAGCCC  
TTCCCAGCGGGACCCCCCTTCCCCTGAGGATGTACAACCCCCAC-----  
-----CTCCAGGCCATATCCAGCTCAGGGGTGGCCACCCT-----CACC  
CCTCCCTGATGCCTNNNNNNNNNNNNNNNNNNNNNNNNNNNNNNNNNNNNNTATCTCATCTATGC  
TTCTTCTCATTTCATGGGATGT  
TTACAAATCAGCGACGGATCGAACATTTGTGAATTTGCTGGCCAGTAACTC  
TCCAAGCGTTTCTACGCTCTGACCCAGCAGAAGTACTTCAGCAACTACA  
GTCCGGTGATCGGGTCTACATTTACGAACCCATYGAGTACTGGAACCTC  
ACAGTGCAGGAGCACTTGAAGACGCTGAGTACGGCTTCAACAAAATCTC  
CTGGATGGACAACCTTCTTCCACTACCTGCGGGTGGTGAACGTGAGTGCCT  
CGACGAAGAACGACTTCATCAACGTAATCAAGGGCTCCTTCTGCGCAGT  
CCGGAGTACCAGCACTTCACAGAGGACATCATCTTCTCCAAGA---ACCG  
CGAAAGCG-----ACGAGTACGACATCATCGCCTCGCGGATGTATCTGG







CTTCTGGCTTCTTCCCCCTCTTTCCTCCTCTTGCTTGCCTCTTCTGGGG  
TTGAAGCAGGGGCTGGAACAGGGTGAACGGTATAACCCCCACTGGCGGGC  
AACCTAGCGCACGCTGGCGCCTCTGTGGATCTCACTATTTTTTCTTCA  
CTTAGCCGGCATTCTTCTATTCTAGGGGCCATTAACCTTATCACGACCA  
TTATTAACATGAAACCCCCGCAATTTCAGTACCAGACACCCCTATTT  
GTGTGGGCCGTGCTAATTACAGCCGTGCTCCTGCTCTTGTCCCTCCCAGT  
TCTTGCTGCCGGAATCACTATGCTACTTACGGACCGAAACCTAAATACGA  
CTTTCTTTGACCCTG-----

-----  
NNNNNNNNNNNNNNNNNNNNNNNNNNNNNNNNNNNNNNNNNNNGGCTCATCCTCAACGAGGCCGAGGTGAT

CCTGGCGCTGGCCCAGGAGTTCCAGATGCGGGTGGTGACGGTGTCCCTGG  
AGGACCAGTCTTCCCCGGCATCGTCCAGGTCTCAGCCAAGCTTCCATG  
CTGGTGAGCATGCACGGCGCCAGCTCATCACCTCCCTCTTCTCCCCCG  
CGGGGCCGTGGTGGTGGAGCTCTTCCCTTACGCCGTCAACCCGGAGCAGT  
ACACGCCTTACAAGACCCTGGCCTCCCTGCCAGGCATGGACCTTCACTAC  
GCCGCTGGAGAAACACCATGAAGGAGAACACGGTGGCCCACCCGGAGCG  
ACCCTGGGATCAGGGCGGCATCGCTCACCTGGAGAAGGAGGAGCAGGAGC  
GCATCTAGCCAGCGAGGACGTCCCAGGCACCTGTGCTGCCGCAACCCC  
GAGTGGCTGTTCCGCATCTACCAGGACACCAGGGTGGACATTCCGTCCCT  
CCTGGAGCTCCTCCG---GGAGAACCTGAAG---ACCCGGCCAGTCTGA  
AGAA---GGCGCGSCCGTACGACCCGTCCACCCGGGACGGGTCCGCGAG  
GCCAGTGCCTGACGTCCGTCCAGGCCGGAATGAGGCCAAGCTGACGGT  
GTCGTGGCAGATCCCCTGGAACCTGAAGTACCTGAAGGTCCGGGAGGTGA  
NNNNNNNNNNNNNNNNNNNNAAGAAGGATACAAGCAAGGGGACCCTGGAGGATCAAATCATTCAGGCAA  
TCCTGCACTGGAGGCTTTTGGGAATGCCAAAACGTTGAGAAACGACA  
CTTCCCCTTTTGGTAAATTCATCCGAATTCACCTTGGAACTGGAAAA  
TTATCTCTGCTGACATAGAGACTTACCTTCTTGAGAAATCGCGTGTAC  
CTTTCAGCTAAAGTCAGAGAGGAACTACCATATCTTTTCCAGATCTTGT  
CCAATCAAAGCCAGAGCTGTTGGACATGCTGCTAATCACCACCAATCCC  
TATGACTACTCCTACATCTCCCAGGGAGAGGTGACCGTCGCGTCAATTA  
TGATTCCGAAGAGTTGATGGCCACTGACAGTGCCCTTGATGTGCTAGGCT  
TTACTCAGGAAGAAAAAATGGGTGCTACAAGTTGACAGGTGCCATCATG  
CACTACGGCAACATGAGGTTCAAGCAAAAGCAGCGAGAGGAGCAGGCCGA

GCCAGATGGTACAGAAGCTGCTGACAAATCAGCTTACTTGATGGGCCTCA  
ACTCTGCAGACCTTATTAAGGGCTTTGTACCCCCAGAGTGAAAGTAGGC  
AATGAGTATGTTACCAAAGGGCAAGGTGTAGATCAAGTCTACTAC-----

-----GGCTACCACACCTTCGAGTGGCAGC  
CGGCCCTGAAGAACGTGTCCCAGCACTGCCAGGKGGGCATCATCGACGGC  
CTCTCTGGCTGGGCGGCCTCCGTGGACGACACCCCGGCGGACACCATCAC  
CCGCCGTTCCGCTAYGACGTGGCACTGGCCTCCGCCCTGATGGACCTGG  
AGGAGGACATCCTGGAGGGCCTGAGGGAGCGCGCCTGGAGGACAGCGCC  
-----GCGGGCTTCAACGTCATGGTCAAGGAGTCCTGCGACGGCATGGG  
GGACGTGAGCGAGAAGCACGGCGGGCGGCCATCCCCGAGAAAGCCG  
TGCCTTCTCCTTACCCTCATGTCCGTCTCCGTCCGGGCCGAGGGCGG  
GGC-----GAGGCCGTGACGGTGT  
CCGGGAGGCCAAGCCCAACTCGGAGCTCTCCTGCAGGCCCTGAGTCTGA  
TGTTTCGTGGACGAGTCGGACCACGAGACGCTCACCGCCATCCTGGGGCCG  
GTGGTGGGCGAGCGGGACGCCATGAAGCAGAGCCGGCTCCTCCTGACGCT  
GGGGGGCCTCCAGCGCTCCTTCCGCTTTCACTTCCGGGGCACCGGTTACG  
ACGAGAAGATGGTGC GCGAGCTGGAGGGCCTGGAGGCCTCGGGCTCCACC  
TACGCTGCACCCTGTGCGACTCCACGCGGGCCGAGGCCTCGTCCAACAT  
GGTGTCTCACTCCATCACCCGCAGCCACGACGAGAACCTGGAGCGCTACG  
AGGTGTGGCGGACCAACCCGTTCTCCGAGTCGGCCGAGGAGCTGCGGGAC  
CGGGTGAAGGGGCTCCGCCAAGCCCTTCTGGAGACCCAGCCACCCT  
GGACCGCTGCACTGCGACATCGGCAACGCCACCGAGTTCTACAAGATCT  
TCCAGGACGAGATCGGGGAGGTGTTCCGGAAGGC---CAAC---CCGAGT  
CGGCAGGAGAGGCGCGGCTGGCGGGCGGCCCTGGACAAACAGCTCCGGAA  
GAAGCTGAAGCTGAAGCCAGTCATGCGCATGAAACGGGAACTACGCCCGGC  
GCCTGATGACCCAGGAGGCAGTGGAGGTGGTGTGCGAGCTGGTGCCCTCC

GAGGAGAGGCGACGGGCCCTCAGTGAGCTGATGGGCCTCTACATCCAGAT  
GAAGCCGGTGTGGCGCGCCTCCTGCCCGGCAARGAGTGCCCCGACCAGC  
TGTGCCGCTACAGCTTCAACTCCCAGCGCTTCGCCGAGCTCCTCTCCACC  
ACCTTCAAGTACAGGTACGACGGCAAGATCACCAACTACCTCCACAAGAC  
GCTGGCCACGTCGCCGAGATCATAGAGAGGGACGGGTCCATTGGAGCGT  
GGGCCAGCGAGGGCAATGAGTCGGGTAACAAG-----

-----GCCAAATCTCGATTTCACCCTGGCGT  
AGGGACTGGTCCTGGCACAGACC--GCAGCGTCCCACCTTAGCAACAGCT  
TGCTATCTCCGCAACAAACCGAAGAGCCCACAGTTG--CTTCCCACAG  
CGTTGGTTTGTACACC--CTGCCAATAACCGACTGGACTTTGCCGCCTC  
GGCATAACGATGCCGCTGCTGCTGCTGATTTTGCCGGTAACGCAGCCACCT  
TGCTATCCTACGCAGCGGCTGGAGTAAAGGCAT-----TGCCCCTGCCC  
ACAGCAGGTTGCTCAAACAGGCCACTTGGTTATTATGCCGATCCATCAG-  
--GGTGG--GGCGCCCCGACTCCACCCCAATACTGT-----AGTA  
AATCTAGTTCAGTACTCTCTTGCTGGCCTAGTAATTCGGTTGGTGGCAGA  
ACAATA-----ACTACCTTA-----CGGAGGA--TGTA--  
-GACGC--CCTCCCCACAGAGAGGTCGCC--AT--TGGCGGCTCCG  
AGGAA--ACAAAACCTAAAGACTT-----GTCAGA--ATCAAGCTGG  
ATAGAG--ACACCATCTTCAATAAAGTCAATTGATTCAAGTGATTCTGG  
AATCTTTG--AGCAAGCCAAACGGAGAAGAATTCACCCTGCTGCCACTC



TGGCTGCCTCCCAGCCTCTCCATCTGGATGAATACATTGTTGTGTTTAGT  
CGTTCAACAACAAGGCTGATACTGAATGAAGCAGAGTTAATCATGGCACT  
GGCCAGGAGTTCCAGATGAGAGTGGTCACAGTATCGCTGGAGGAACAGT  
CTTTCCCCAGTATCGTCCAGGTGATCAGCAGGGCTACCATGCTAGTCAGT  
ATGCATGGAGCTCAGTTGATCACCTCACTGTTCCCTCCCAGAGGAGCTGT  
TGTGGTGGAGCTGTTCCCCTTTGCTGTGAACCCAGAACAGTACACCCCGT  
ATAAAAACCCTTGCCCTCCCTTCCAGGCATGGACCTTCATTATATCTCCTGG  
AGGAACACGAAGGAGGAGAACCATCACCCACCCAGACAGACCCTGGGA  
ACAAGGGGGCATCGTCACTTGGAGAAGGAGGAGCAAGAGCGAATACTGT  
CGAGCAAAGATGTCCAAGGCACCTCTGCTGCCGAACCCTGAGTGGCTC  
TTCCGGATCTACCAGGACACCTTGGTGGACATCCCCTTTTCTGGAAGT  
CCTGAA--AGAGGGCATGAAG---ACAAAGCCAGCTTTAAGAA---GT  
CAAAGCCGGCCAGTACAGTCCATCCAGGCCGGGTCAGAGAACCCAGTGT  
CAGACCTCAGTACAAACACTAATGAAGCTAAACTCACAGTATCCTGGCA  
GATCCCATGGAATCTGAAATACCTGAAGGTGAGAGAGGTGAAGNNNNNNNNNNNNNNNNNNNNAAAAAAG  
ACACCAGCAAGGGGACACTGGAGGATCAAATCATCCAGGCCAACCCGGCG  
CTGGAGGCATTCGGCAATGCCAAAACACTGAGAAAACGACAACTCGTCTCG  
TTTTTGGAAAATTTCATCCGAATTCACCTTTGGTACGAGCGGAAAGCTGTCGT  
CTGCTGACATCGAGACGTACCTGCTGGAGAAGTACGCGTCACCTTTCAG  
CTCAAAGCTGAAAAGAACTACCACATCTTCTACCAGATCCTGTCCAATCA  
GAAGCCGGAGCTGCTGGACATGCTGCTCATTACCAACAACCCATACGACT  
ACTCCTACATCTCCCAAGGAGAGGTGACGGTCGCCCTCCATCAATGACTCC  
GAGGAGCTGATGGCCACCGACAGCGCCTTTTGTGCTCGGCTTCACTCC  
AGATGAGAAGATGGGCGTCTATAAATTGACGGGCGCCATCATGCACTATG  
GCAACATGAAGTTCAAACAGAAGCAGCGTGAGGAGCAGGCTGAGCCGGAC  
GGCACGGAGGCTGCCGATAAATCTGCTTATCTAATGGGGCTGAACTCTGC  
TGACCTCATCAAAGGCTGTGCCATCCAGAGTCAAGGTAGGAAATGAAT  
ACGTGACAAAAGGCCAAAGTGNNGATCAGGTCTACTACCCAACAAGGAGG  
CCTTCAAGTGTGAAGAGTGTGGGAAGCACTACAACACCAAGCTGGGATAT  
AAGCGCCATGTAGCCATGCACTCTGCAACGGCAGGGGATCTCACCTGTAA  
AGTGTGCATGCAGACCTACGAGAGCACGCCTGTGCTGTTGGAGCACCTCA  
AGAGCCACTCTGGGAAGTCTTTCAGGTGGCACCAAGGAGAAGAAACACCCA  
TGTGACCACTGTGACCGTCGTTTCTACACACGAAAGGATGTGAGACGGCA  
CATGGTGGTCCACACGGGCCGAAAGGACTTCCTGTGCCAGTACTGTGCC  
AACGCTTCGGCAGGAAGGACCATCTGACACGCCATGTGAAGAAGAGCCAC  
TCACAGGAGCTGCTAAAGATCAAGACGGAGCCTCCTGATATGTTAGGTCT  
TTTAGCTTCCGGGTCACCACCCTGCTCTGTGAAGGAGGAGCTCAGCCCCA  
TGATGTGCGGTATGGGTCCCAACAAAGACCCCATGATGGGAAAACCATTT  
CCCAGTGGGGCCCCCTTTTCCAATGGGCATGTACAACCCCCACCAT-----  
-CTCCAGGCCATGTCCAATTCTGGGGTGGGTCAACCA-----CACCTT  
CCCTGATGCCAGTTCCTTGTCTGCAGCTATGGGTATGGGCTGTCACATG  
GAATATCTCATCTACGCCTCTTTTTTCATTCATGGGATGTTTACAAATTAG  
TGAYGGATCAAATATYGTGAATCTGCTGGCTAGTAACTCTCCGAGTGTTT  
CCTATGCTCTGACCCAGCAAAAATACTTCAAGTAACTACAGTCCCCTGATT  
GGGTTTTACATTTATGAGCCCATCGAGTACTGGAACCTAACGGTGCAGGA  
GCACNNAAGACTNTGAGTCAATGGCTTCAACAAGATCTCCTGGATGGACAACCTT  
TTTCCACTATTTGCGGGTGGTGAATGTGAGTGGTCAACCAAGGGTGACT  
TCATCACCATCCTCAAGGGCTCTTTCCTGCGCAGCCCGGAGTACCAGCAC  
TTCACTGAGGACATCATATTCTCCAAGA---ACCGTGAGACTG-----A  
TGAGTATGACATTATCGCCTCACGGATGTACTTAGTGGCACGGACGACAG  
AGAAGAAGCGCGAAGAGGTGGTGGAGCTTCTAGAAAAGCTTCGTCCGTTG  
ATGCTAATCAACAGCATCAAATTCATTGCCTTCAATCCTACGTTTGTGTT  
CATGGACCGCTACAGCTCTTCTGTCTCCTCNCCATCCTGACCTCAGGATT

CAGCGTACTCACAATCCTCATCCTCACTTTCTTCTTGGTCATCAACCCCT  
TGGGTAACCTTCTGGCTCATTCTCACTGTAACGTCCGTGGAGCTGGGCGTC  
TTGGGTTNNNNNNNNNNNNNNNNNNNNNNNTGGCAGCCAGCTCTCAAGAATGTGTCTACATCTTGCAATG  
TTG  
GCATTATTAATGGGCTCGCTGGATGGGCTTCTCAGTGGATGATTCCCCA  
GCTGACACCATCACTCGGCGGTTTCGCTATGATGTGGCACTTGTGTCAGC  
TTTAAAGGACCTGGAGGAGGACATCATGGAGGGCTGAAAGAGAGTGGGA  
TGGAAGACAGTGCTTGCACCTCAGGCTTCAAGTGCATGATCAAAGAATCT  
TGTGATGGCATGGGCGATGTCAAGTGAAGACCGTGGAGGACCAGTTGT  
TCCCGAGAAGGCTGTACGTTTCTCTTCACTATTATGTCTGTCTCTGTCC  
TAGCAGACGAGGAGGAG-----GAA  
GAGGTTACCATCTTACAGAGCCAAAGCCAAACTCAGAACTCTCCTGTAA  
GCCCCTTTGCCTGACATTTGTAGATGAGTCAGACCATGAGACACTCACAG  
CCATCCTGTGGCCTATCGTTGCAGAGCGTAACGCAATGAAAGAGAGTAGG  
CTTATCCTACCCATAGGTGGACTACCTCGCTCTTCCGCTTTCCTTTCAG  
AGGCACAGGATATGATGAGAAGATGGTACGTGAGATGGAGGGCCTCGAAG  
CCTCAGGGTCCACCTACATCTGCACTCTTTCGACTCCAGTCGGGCAGAG  
GCCTCTCAAAATATGGTGTACTACTCCGTCACCCGCAGTCATGAAGAGAA  
CTTAGAACGTTATGAAATATGGCGAACCAACCCCTTTTCTGAGTCTGTAG  
AGGAGCTGCGAGAGAGAGTCAAAGGGGTTTCTGCCAAGCCTTTCATGGAA  
ACACACCCACACTGGATGCATTACACTGTGACATAGGCAATGCCACTGA  
GTTCTACAAAATCTTCCAGGATGAGATCGGGGAGGTGTATGAAAAGGT--  
-CAAC--CCAGCCGGGAGGAGCGACGCAGTTGGAGGGCAGCCCTAGAT  
AAACAGCTGAGAAACAAGATGAAGCTTAAACCGGTAATGAGGATGAATGG  
GAACTACGCCCGCCGGCTAATGACCATGGAGGCTGTGGAGATAGTGTGTG  
AGCTCGTGCCCTCAGAGGAGAGGAGGGAGGCCCTGAGGGAGCTTATGAGG  
CTCTACTTGCAGATGAAGCCTGTGTGGCGGCCACCTGCCAGCCAAGGA  
GTGCCCTGACCAGCTGTGCCGCTACAGTTTTAACTCCAGCGCTTTGCCG  
ACCTCCTCTCCTCTGCCTTTAAATATAGGTACAATGAAAGATAACCAAT  
TACCTGCACAAGACCCTGGCCCATGTGCCTGAAATCATAGAGAGAGATGG  
ATCTATAGGAGCCTGGGCCAGCGAGGGGAATGAGTCTGCAAACAAATCGT  
ACACCATTGAGATGGTCCCATGGGGCCAGGTGGAAGGAGAGCCCAAA  
CCTTCTCCTGCTCCATCGAAGACCCAACGAAACAGACAAAGTTCAAGGG  
CATCAAGACGTACATATCGTACCGGTCACACCAAGCCACACAGCGCATC  
CTGTCTACAGGCGCTACAAACACTTTGACTGGCTGTACAACCGCTTACTG  
CACAAGTTCACTGTGATCTCTGTGCCACCTGCCTGAGAAGCAGGCCAC  
GGGGCGATTTGAGGAAGACTTCATCGAGAAGCGCAAGAGACGACTTATAC  
TGTGGATGAACCACATGACCAGTCACCCGGTCTCTCCAGTATGAAGGC  
TTCGAGCACTTTCTGATGTGTGCTGATGACAAGCAGTGGAAACTGGGCAA  
GAGACGGGCRGAGAAGGACGAGATGGTGGGCGCCATTTTCATGCTGACCC  
TGCAGATCCCTAACGAGCACCAGGACCTTCAAGATGTAGAGGAGCGGATC  
GACTCCTTCAAGTCTTTGCTAAGAAGATGGATGACAGCGTGTATGCAGCT  
CACACATGTTGCCTCAGAGCTTGTGCGTAAGCACCTGGGTGGGTTTCAGGA  
AGGAGTTCCAGCGCTGGGGAATGCCCTCCAGTCTGTAAGCCAGGCGTTC  
ATGCTGGACCCACCCACAGCTCAGAGACCTTCAACAACGCCATCTCCCA  
TNNNNNNNNNNNNNNNNCTCAAACCTGACCTCTCTGGGTTTCATCATTTGGAGTCGGTGTGGTTGGAA  
ACCTCCTGATCTCCATCCTGCTGGTCAAAGACAAGAGCCTGCACAGAGCA  
CCCTACTATTTCTGCTGGACCTGTGCGCCTCTGATATCCTGCGCTCAGC  
CATCTGCTTCCCTTTGTCTTACCTCGGTCAARAATGGATCTGCCCTGGA  
CCTATGGCACGCTGACCTGCAAAGTGTATCGCCTTCTCGGTGTGCTCTCC  
TGTTTCCACACAGCGTTTATGCTCTTCTGTGTCAAGTGTACACGCTACCT  
GGCCATCGCACATCATCGTTTCTACACCAAGAGGCTGACCTTCTGGACCT  
GTCTAGCTGTATCTGCATGGTGTGGACGTTGTCAAGTAGCTATGGCATTC



CCGCCGGTGCTGGACGTAGGGACGTACTCTTTTATCCGGGAGGAGGACCA  
GTGCACATTCCAGCACCGTTCCCTCAGGGCGAATGATTCGCTGGGCTTCA  
TGCTCCTGCTGGCGCTCATCCTCCTGGCCACACAGCTGGTTTACCTCAAG  
CTCATCTTCTTCGTCCACGACCGTCGAAAGATGAAGCCTGTCCAGTTCGT  
GCCTGCTGTAGCCAGA ACTGGACCTTTCACGGGCCAGGGCCAGCGGGC  
AGGGCGCGGCCAACTGGCTGGCTGGATTTGGTCGAGGCCCCACCCCGCCT  
ACTTTGCTGGGCATCCGGCAGAACAGCAACGCAGCAGGCCGCAGGCGTCT  
ACTGGTGTGGATGAATTCAAAACAGAGAAGAGGATTAGTAGGATGTTCT  
ACATCATGACGTTTTTCTTCCCTGGCACTCTGGGGGCCATATCTGGTCGCC  
TGCTACTGGCGGGTGTGTTGCAAGGGGCCCGTTGGTCCCTGGGGGCTACCT  
GACGGCAGCCGTGTGGATGAACTTTGCCAGGCTGGGGTCAATCCTTTCA  
TCTNNNNNNNNNNNNNNNNNNNNNGCCAAATCTCGCTTTCACCCTGGCATGGGGACTGGTCCTGGCACGGA  
GC---GCAGCGTCCCACCTCGGCAACAGCTTGCTATCCCCGCAGCAAACCG  
AGGAGCCCCTGTTGCCACCCCCCGCAGCGATGGTTTGTACCC---CT  
GCCAACAAACCGACTGGACTTTGCTGCCTCGGCATACGACGCCGCT-----  
----GATTTCCGCCGTAACGCGGCCACCTTGCTGTCTTACGCAGCGGCCG  
GAGTGAAGGCTC-----TTCCCTGCCGACTGCAGGCTGCTCCAACCGG  
CCTCTTGGCTATTACGCAGACCCGTCAG---GCTGG---GGAGGACGCAC  
GCCGCCGCAGTACTGTGGTGTAAATAGCAAACCCAGCTCGGTCTTTTCT  
GCTGGCCACTA ACTCTATCGGTGGCAGAGCTAGTA---CC---A ACTAC  
CTGG-----CCGAGGA---GGGA---GACTC---CATCCCGACAGA  
GAGATCACCG---AT---CGGCGGCACAGAGGAG---ACCAAACCCAAAG  
ACATGAC---ATCAGA---GTGCAACTGGATAGAG---ACGCCGTCCTCC  
ATTAAGTCCATTGATTCAAGCGATTCTGGTATCTTTG---AACAGGCCAA  
AAGGAGAAGGATCTCACCTTCTGCCACGCCG-----GTGTCAGAGA  
CAGTGTCCCCGTTAAAATNNNNNCATCACTCAACAGGCGAAGTCACAGAGAGAGA  
AGTGGCGTTGGGGATAAATCCGTTTCGCGGATGGGATGGGCGCCTTCAAAA  
TAAACCACAGCTCCCATGATATTGGCTCCGG---ACAAACGGCGTTTTCC  
TCCCAGGCG---CCCGGCTAC---GCGGCAGCCGCCCTGGGA---CACCA  
TCA-----CCACCCGACCCACGTTGGCTCT---TACTCCACGGCGGCTT  
TCAACTCCACCAGGGACTTTCTCTTCAGAAATCGGGGATTTCGGGGACGCC  
ACCGG-----CGCGCAGCACAGTTTGTTCGCCTC-----  
CGGAAGTTT---C-----GCAGGGCCACATGGACACTCAGATGCAGCGG  
GGCACCTGCTCTTCCCGGGGCTCCACGAG---CAAGCGGCGAGCCATGCG  
TCTTCCAATGTGGTCAACAGCCAGATGCGGCTGGGCTTCTCGGGGGACAT  
GTACGGACGGGCGYACCAGTACGGCCACGTTACAAGCCCGCGGT---CCG  
ACCCTATGCTTCGACCCAGCTGCACGGCTACGGCCCCATGAACATGAAT  
ATGGCCGCA---CATCATGGAGCAGGGGCCCTTCTTTCGATACATGAGGCA  
GCCGATCAAACAAGAGCTCATCTGCAAGTGGGTCGAGCCGGAGCAGCTGA  
CGAATCCCAAAAAGTCGTGCAACAAAACTTTTAGCACGATGCACGAGCTC  
GTGACCCATCTGACGGTGGAGCATGTGGGAGGACCGGAGCAAACGAACCA  
CATCTGCTTCTGGGAGGAATGCGCCAGAGAAGGAAAGCCATTCAAAGCCA  
AATACAACTTGTAATCATATCAGAGTACACACCCGGAGAAAAGCCGTTT  
CCGTGTCCGTTCCCGGGCTGTGGCAAA

>Apogon lateralis

-----  
-----  
-----  
-----  
-----  
-----  
-----  
-----



GTGGGAAGCACTACAACACCAAGCTGGGATATAAGCGCCATGTGGCCATG  
CACTCTGCCACTGCAGGGGATCTCACTTGTAAAGTGTGCATGCAGAGCTA  
CGAGAGCACACCTGTGCTCCTGGAGCACCTCAAGAGCCACTCGGGGAAAT  
CCTCAGGTGGCGCCAAGGAGAAAAAACCCCATGTGACCACTGTGACCGC  
CGATTCTACACGAGGAAGGATGTGAGGCGGCACATGGTGGTCCACACGGG  
CAGGAAGGACTTTCTGTGCCAGTACTGTGCCAGCGCTTCGGCAGGAAGG  
ACCACCTGACACGCCACGTAAAGAAGAGCCACTCACAGGAGCTGCTGAAG  
ATCAAAACAGAGCCTCCAGATATGTTAGGTCTATTAGCGTCTGGGTACC  
TCCTTGCTCTGTGAAGGAGGAGCTTAGTCCCATGATGTGTGGCATGGGT  
CCAACAAGACCCTATAATGGGAAAACCGTTCCCCAGTGGAGCCCCCTTT  
CCTATGGGCATGTACAACCCCCACCAT-----ATCCAGGCCATGTCTAA  
TTCTGGTGTGGGTACCCA-----CACCTTCCCATAATGCCAGTTCCT  
TGCTGTCAGCTATGGGCATGGGTGTGCATGTGGATNNNNNNNNNNNTGCATCTTTTTTCATT  
CATGGGATGTTTACAAATTAGTGATGGATCCAATATTGTGAACCTGCTTG  
CTAGTAACTCTCCGAGTGTTCATATGCTCTGACCCAACAGAAATACTTC  
AGTAACTACAGTCCCTGTGATTGGGTTTTATATTTATGAACCCATCGAATA  
CTGGAACCTCAACAGTGAAGAGCACCTAAAGACACTGAGTCATGGTTTCA  
ACAAGATCTCCTGGATGGACAACCTTTTTCCACTACCTGCGGGTGGTGAAT  
GTGAGCGCATCAACCAAAAGCGACTTCATCACTATCCTCAAGGGCTCCTT  
TCTGCGCAGCCAGGAGTACCAGCACTTCACTGAGGACATCATATTTCTCCA  
AGA---ACCGTGAGACCA-----ACGAGTATGACATTATTGCCCTCACGC  
ATGTACTTAGTGGCCCGAACCACCGAGAAGAAGCGTGAGGAGGTTGTGGA  
GCTTTTGGAAAAGCTTCGCCCATTGATGTTGATCAACAGCATCAAGTTCA  
TTGCCTTCAATCCCAGTTTTGTGTTTCATGGACCGCTACAGTTCCCTGTGC  
ATCTCTCCCATTCTGACCTCAGGCTTCAGTGTGCTCACCATCCTCATCCT  
CACTTCTTCTCGGTTCATCAACCCCCCTGGGAAACTTCTGGCTCATCCTGA  
CGGTAACATCCGTCGANNNNNNNNNNNNNNNNNNNNNNGGCTTTCACCAGTTTGAATGGCAGCCAGCTCT  
CA  
AGAATGTGTCTGCATCTTGCAATGTTGGCATTATTAATGGGCTTTCTGGA  
TGGACTTCTACAGTGGACGAGTCCCCGGCTGACACAATCACACGGCGCTT  
TCGCTATGATGTGGCAGTGGTATCAGCATTAAAGGATCTGGAGGAGGACA  
TCATGGAAGGGCTGCAAGAGAGTGGGATGGAAGACAGTGCATGCACCTCG  
GGCTTCAGTGTATGATCAAAGAAATCGTGTGATGGCATGGGTGATGTCAG  
CGAGAAGCATGGCGCAGGACCTGTTGTTCCCGAGAAGGCTGTTTCGTTTCT  
CTTTCACGATTATGTCTGTGTCTGTCAAGGCAGAAGGAGAGGAG-----  
-----GAGGTTACCATCTTCACAGAGCC  
GAAGCCAAACTCAGAACTGTCTTGTAAAGCCCCTCTGCCTCACATTTGTGG  
ATGAATCAGACCACGAGACGCTCACAGCTGTCTTGGGGCCGATAGTTGCA  
GAGCGCACTGCAATGAAAGAGAGCAGACTCATCGTATCCATAGGTGGCCT  
CCCTCGATCCTTCCGCTTYCACTTCCGAGGCACAGGATATGATGAGAAGA  
TGGTCCGTGAGATGGAGGGCCTTGAGGCTTCGGGTTCCTCTTACGTCTGC  
ACGCTGTGTGACACCAGTCGAGCAGAGGCCTCTCAGAATATGGTGTGCA  
CTCAGTCACCCGCAGTCATGATGAAAACCTAGAACGCTATGAAATTTGGA  
GAACCAACCCTTTTTTCAGAGTCTGCAGATGAACTGAGAGACAGAGTCAA  
GGGGTCTCCGCTAAACCTTTCATGGAGACCCAGCCTACAATAGATGCATT  
GCACTGTGACATTGGTAATGCCATTGAGTTCTACAAAATCTTTCAGGATG  
AAATAGGTGAGATGTATCAAAAGGT---CAAC---CCCAGCCGGGAGGAA  
CGACGCAGCTGGAGGGCAGCTTTAGATAAACAGCTGAGGAAGAAGATGAA  
GCTTAAACCAGTAATGAGGATGAATGGGAACTATGCCCGCAAGCTAATGA  
CCCAGGAGACTGTGGAGGTGGTGTGTGAGTTGGTGCCCTCTGAGGAAAGG  
AGGGAGGCCCTGAGGGAGCTGATGAGGCTCTACCTGCAGATGAAACCTGT  
GTGGCGTGCCACCTGCCCTGCAAAAAGAAATGCCCTGACCAACTGTGCCGCT  
ACAGCTACAACCTCCAGAGCTTTGCTGACCTTCTTTCCTCTACATTTCAA

TACAGGTACAATGGAAAGATAACCAACTACCTGCACAAGACCTTGGCTCA  
CGTTCTGAAATCATAGAGAGAGATGGATCCATAGGAGCCTGGGCCAGTG  
AGGGAAACGAGTCAGCAAACAAATCATATACTATAGACATGGGCCCTTG  
GGACCCGGCTGGAAGGAGAGCCCACAGCCTTTCTGCTGCTCCATTGAAGA  
CCCCACAAAACAACTAAGTTCAAAGGCATCAAGACGTACATTTTCGTACC  
GTGTGACGCCGAGCCACACAGGGCGTCCCCTACAGACGCTACAAACAC  
TTTGACTGGCTGTACAACCGCTGCTGCACAAATTTACTGTGATCTCTGT  
TCCTCACCTGCCTGAGAAGCAGGCCACCGGGCGATTTGAGGAAGACTTCA  
TTGAAAAGCGCAAAAAGACGACTGATACTATGGATGAACCACATGACCAGT  
CACCCAGTACTCTCCAGTATGAAGGCTTTGAGCACTTTCTGATGTGTGC  
TGACGACAAGCAATGGAAACTGGGCAAGAGACGAGCCGAGAAGGACGAGA  
TGGTGGGCGCTCACTTCATGCTGACGCTTCAGATTCCGAACGAGCACCAG  
GACCTTCAGGATGTAGAGGAGCGTGTGGACTCCTTCAAGTCCTTTGCTAA  
GAAAATGGACGACAGTGTGATGCAGCTCACACATGTTGCATCAGAGCTGG  
TGCGTAAACATTTGGGTGGATTACAGGAAGGAGTTCAGCGGCTGGGAAAT  
GCCTTCCAGTCCATCAGCCAGGCCCTTATGCTTGACCCTCCTCATAGCTC  
TGAGGCCCTCAACAACGCCATCTCCACNNNNNNNNNNNTTCCCAAACCTGACCTCTCTGG  
GTTTCATCATTGGAGTCGGTGTGGTTGGGAACCTCCTGATCTCCATCCTG  
CTGGTTAAAGACAAGAGCCTGCACAGAGCGCCCTACTATTTCCCTGCTGGA  
CCTGTGCGCCTCTGATATCCTGCGTTCTGCCATCTGCTTCCCCTTTGTCT  
TCACCTCRGTTAAGAATGGATCTGCCCTGGACCTACGGCACGCTGACCTGT  
AAAGTGATTGCCTTCCCTGGGGGTGCTCTCCTGTTTCCATACGGCATTTCAT  
GCTATTCTGTGTCAGTGTACCCGCTACCTGGCCATAGCACATCATCGTT  
TCTACACCAAGAGGCTAACCTTCTGGACCTGTCTGGCTGTCTGTATG  
GTCTGGACGTTGTCTGTTGCTATGGCATTCCCGCCGGTGTAGATGTAGG  
GACGTACTCTTTTATACGGGAGGAGACCAATGCACATTCCAGCACCGCT  
CCTTTAGGGCGAATGATTCGCTGGGCTTCATGCTCCTGCTGGCGCTTATC  
CTCCTGGCCACACAGCTGGTTTACCTCAAGCTCATCTTCTTCGTCCACGA  
TCGTCGAAAGATGAAACCAGTCCAGTTCGTGCCTGCAGTCAGCCAGA  
GGACCTTCCACGGGCCAGGGCCAGCGGGCAGGCAGCGGCTAACTGGCTG  
GCTGGATTTGGTTCGAGGCCCCACCCCGCTACTTTGCTGGGCATCAGGCA  
GAACAGCAACCGCAGCGGGCCGAGGCGTCTACTGGTGTGGATGAGTTCA  
AAACGGAGAAGAGAAATAGTAGGATGTTCTACATCATGACGTTTTTCTTC  
CTGGCTCTGTGGGGGCCCTATCTGGTAGCCTGTTACTGGAGGGTGTTC  
AAGGGGCCCGTTGTCCCTGGGGGCTACCTGACAGCGGCCGTGTGGATGA  
GCTTTGCCCAGGCTGGGGTCAATCCTTTTCATCTGCNNNNNNNNNNNNNNNGCCAAATCTCGCTTT  
CACCTGGCGTGGGGACTGGTCTTGGCACGGAGC---GCAGCGTCCCACT  
CGGCAACAGCTTGCTATCCCCGAGCAAACCGAGGAGCCCACTGTTGCCA  
CCCCCCGACAGCGATGGTTTGTACCC---CTGCCAACAACCGACTGGAC  
TTTGCTGCCTCGGCATACGACGCCGT-----GATTTCCGCCGGTAA  
CGCGGCCACCTTGCTGTCTACGCAGCGGCCGGAGTGAAGGCTC-----  
TTCCCTGCCGACTGCAGGCTGCTCAACCGGCTCTTGGCTATTACGCA  
GACCCGTGAG---GCTGG---GGAGGACGCACGACGCCGAGTACTGTGG  
CGTAAATACAAATCCAGCTCGGTCTTTTCGTGCTGGCCCCGCTAACTCTC  
TCGGCGGACAGCAGGCC---CC---AACTACCTGG-----CCGAG  
GA---GGGA---GACTC---GATCCCGACGGAGAGGTCACCG---AT---  
CGGCGGCTCGGAGGAG---ACCAAACCCAAGGACAT-----GTCAGA--  
-ATCCAGCTGGATAGAG---ACACCGTCTTCTATTAAGTCCATTGATTTCG  
AGTGATTCTGGGATCTTTG---AACAGGCCAAAAGGAGAAGGATCTCACC  
TTCTGCCACACCA-----GTTTCAGAGACAGTGTCCCCATTA  
CGGAGNNNNNNNNNNNNNNNNNNNNNACAGAGAGAGAAGTGGCGTTGGGGATAAAATCCATTCCGGGATGG  
G  
ATGGGCGCCTTCAAATAAACCACAGCTCCACGATATTGGCTCCGG---





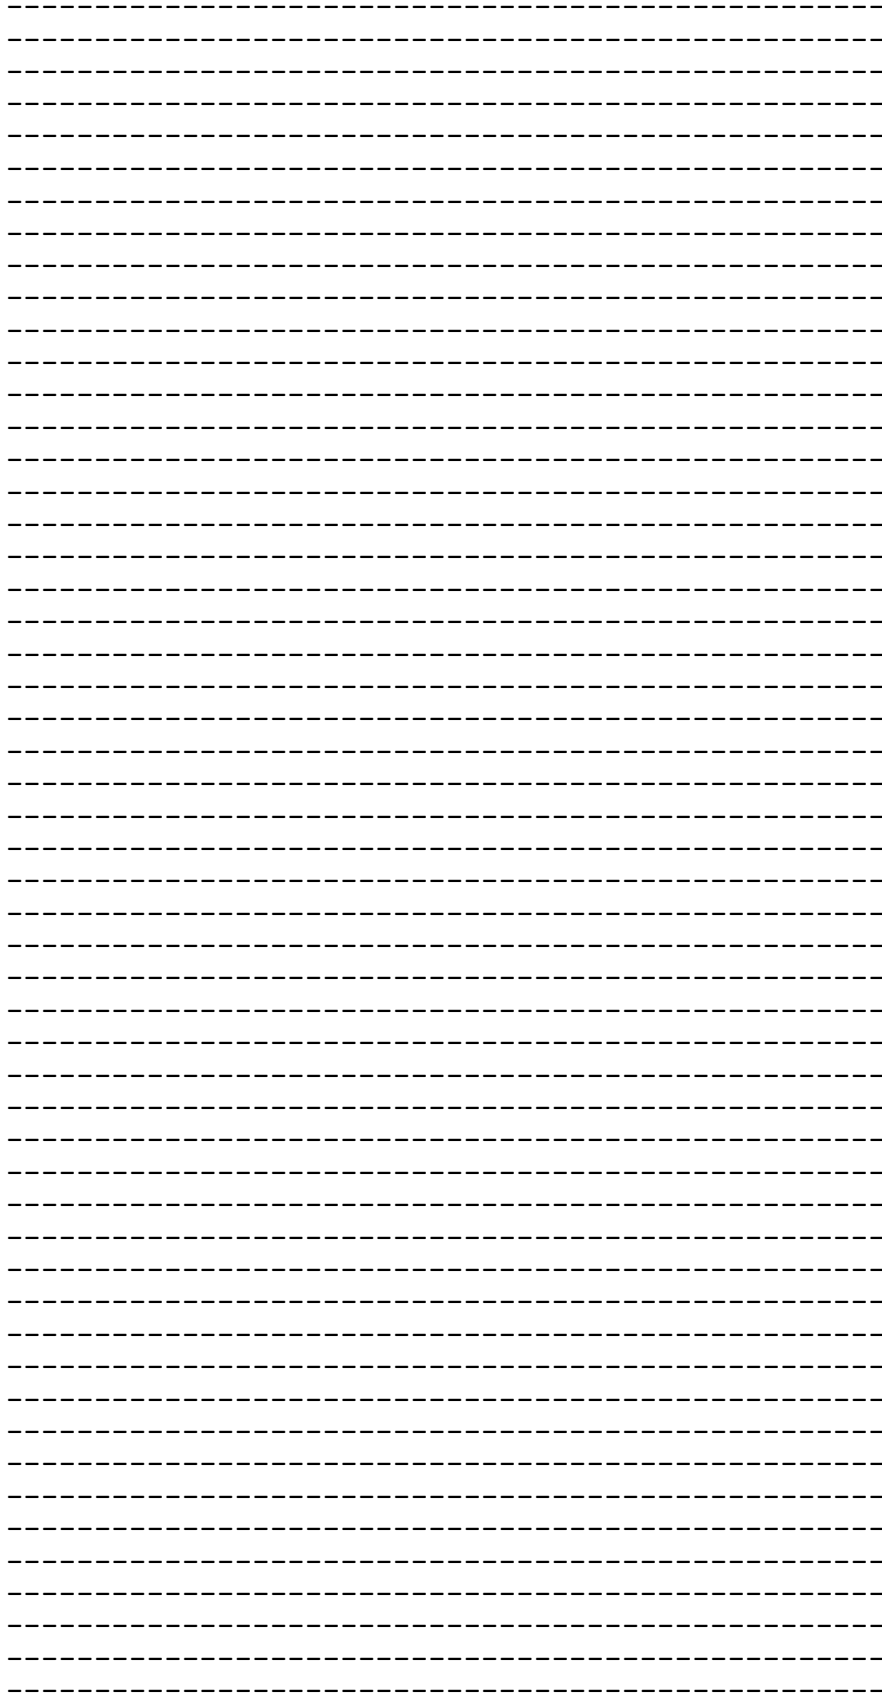





CCACATTCTTTGACCC-----

-----  
-----  
-----

-----TTCTAGAGAGGAATCTTCACCCATCCAACCTGCCCTGG  
CATGCTGTTGCTGTCTGACGCCACCAGTGCACCAAGCTGTCAGAGCTCT  
CCTGGGGCATGTGCCCTCAGCAACTTTCCCGCTATTTGCAAGACCGAGGAT  
TTCTCCAACCTGCCCAAAGATATGGTGGTGCAGCTTTTGTACATGAGGA  
GCTAGAGACAGAAGATGAGAGGCTGGTTTATGAAGCTGCCCTCAACTGGA  
TCAACTATGACCTGGAAAAGAGACACTGTAACCTTCCAGAGCTCCTGAGA  
ACAGTCCGTCTGGCCCTGCTGCCTGCCATCTTTCTCATGGAGAATGTATC  
TACAGAAGAGCTGATCAACGCACAGGCCAAGAGCAAGGAGCTGGTGGATG  
AAGCTATCCGGTGAAGCTGAAGATCCTGCAGAATGATGGCGTCGTTAAC  
AGCCCATGTGCTCGACCAAGAAAAACCAGCCATGCCCTCTTTCTTCTGGG  
AGGGCAGACTTTCATGTGTGACAAGTTGTACCTGGTGGACCAGAAAAGCCA  
AAGAGATCATCCCCAAAGCTGACATCCCTAGCCCAAGGAAAGAGTTCAGC  
GCCTGCGCCATCGGCTGTAAGGTGTACATCACTGGCGGGA--GAGGCTC-  
AGAGAATGGCGTTTCCAAAGATGTATGGGTCTATGACACCGTCCATGAGG  
ATTGGTCAAAGGCGGCACCAATGCTCATCGCCAGGTTTGGCCATGGCTCT  
GCAGAGCTGAAACACTGCCTCTACGTGGTAGGAGGTCACACCGCAGCGAC  
TGGCTGCCTCCCGCCTCTCCGTCTGGATGAATACATTGTTGTGTTTAGT  
CGTTCAGCGACGAGGCTGATACTGAATGAAGCAGAGCTAATCATGGCGCT  
GGCCAGGAGTTCAGATGAGAGTGGTACCGGTATCACTGGAGGAACAGT  
CCTTACCAGCATCGTCCAGGTGATCAGCGGTGCTTCCATGTTAGTCAGT  
ATGCATGGAGCTCAGCTTATCACCTCCCTCTTCCCTCCCAGAGGAGCTGC  
TGTGGTGGAGCTGTACCCTTTTGTCTGTTAACCCAGAGCAATACACCCAT  
ATAAAACCTTGCCTCCCTTCCAGGTATGGACCTTCACTATATCTCCTGG  
AGGAACACTAAGGAGGAGAACACCATCACCCACCCAGACAGACCCTGGGA  
ACAAGGGGGCATTGCTCACTTGGAGAAGGAGGAGCAGGAGCGAATACTGG  
CTAGCAAAGATGTCCCCAGGCACCTTGTGCTGCCGCAACCCAGAGTGGCTC  
TTCCGGATCTACCAGGACACTTTGGTGCACATCCCTTCCCTTCCCTGGAAGT  
CCTCAA---AGAGGGCATGAAG---ACAAAGCCCAGCTTAAAGAA---GT  
CAAAGCCGGCCAGCACAGTCCATCCAGGCCGGGTCAGAGAACCCAGTGT  
CAGACCTCAGTACAAACCACTAATGAGGCTAAACTCACAGTCTCCTGGCA  
GATCCCATGGAATCTGAAATACCTGAAGGTGAGAGAGGTGAAGTACGAGG  
TGTGGATCCAGAAAAGAGACACCAGCAAGGGGACACTGGAGGATCAAATC  
ATCCAGGCAAACCCCGCCTGGAGGCCTTCGGCAACGCCAAAACACTGAG  
AAACGACAACCTCGTCTCGTTTTGGTAAATTCATAAGAATTCACCTCGGTA  
CGAGCGGCAAGCTGTCTGCTGCCGACATCGAGACGTACCTGCTGGAGAAG  
TCACGTGTCACCTTTCAGCTGAAGGCTGAGAGGAACTACCACATATTCTA  
CCAGATCCTGTCCAATCAGAAGCCAGAGCTGCTGGACATGCTGCTGATCA  
CCAACAACCCGTACGACTACTCCTACATCTCCAAGGAGAGGTAACAGTC  
GCCTCCATCAACGACTCAGAGGAGCTGATGGCCACCGACAGCGCCTTCGA  
TGTACTCGGCTTCACTGCAGACGAGAAGATGGGCGTCTATAAACTGACAG  
GCGCCATCATGCACTACGGTAACATGAAGTTCAAACAGAAGCAGCGTGAG  
GAGCAGGCGGAGCCGGACGGGACGGAGGCTGCTGATAAATCGGCTTACCT  
AATGGGGCTGAACTCTGCTGACCTCATCAAAGGGCTGTGCCACCCAGAG  
TCAAGGTAGGAAACGAATACGTCAACAAAGGACAAAGTGTGGACCAAGTC  
AACTACCCTAACAAGGAGGCCTTCAAGTGTGAGGAGTGTGGGAAGCACTA  
CAACACCAAGCTGGGATATAAGCGCCATGTGGCCATGCACTCTGCCACAG  
CAGGGGATCTCACCTGTAAAGTTTGCATGCAGACCTATGAGAGCACACCT  
GTACTCCTGGAGCACCTCAAGAGCCACTCTGGGAAGTCTTCTGGTGGCGC

CAAGGAGAAAAACACCCATGCGACCACTGTGATCGGCGTTTCTATACGC  
GGAAGGATGTGAGACGGCACATGGTGGTCCACACAGGCCGAAAGGACTTC  
CTGTGCCAGTACTGTGCCAGCGCTTTGGCAGGAAGGACCATCTGACACG  
TCACGTGAAGAAGAGCCACTCGCAGGAGCTGCTGAAGATCAAGACGGAAC  
CTCCTGATATGTTAGGTCTTTTAGCCTCAGGGTCACCACCTTGCTCTGTG  
AAGGAGGAGCTCAGTCCCATGATGTGCGGAATGGGTCCCAACAAAGACCC  
AATGATGGGCAAACCATTTCCCAGTGGGGCCCTTTTTCGATGGGCATGT  
ACAACCCCAACCAT-----CTGCAGGCCATGTCTAATTCTGGGGTGGGT  
CACCCA-----CACCCGTCCCTGATGCCAGTTCCCTTGCTGCAGCTAT  
GGGCATAGGCTGTCACATGGAATATCTCATCTACGCCTCTTTCTCATTCA  
TGGGATGTTTACAAATCAGTGACGGATCAAATATTGTGAACCTGCTGGCA  
AGTAACTCTCCAAGTGTTCCTTACGCTCTGACCCAGCAGAAATACTTCAG  
TAACTACAGTCCCCTAATTGGTTTTTACATTTACGAGCCCATCGAGTACT  
GGAACTCCACGGTGCAGGAGCACCTGAAGACTCTGAGTCATGGCTTCAAC  
AAGATCTCCTGGATGGACAACCTTTTCCATTACCTGCGAGTGGTGAATGT  
GAGTGCATCAACCAAAAAGCGACTTCATCACCATCCTGAAGGGCTCCTTCC  
TGCGCAGCCAGAGTACCAGCACTTCACTGAGGACATCATATTTTCCAAA  
A---ACCGTGAGACTG-----ATGAGTACGACATTATCGCCTCACGCAT  
GTACTTGGTGGCAAGGACAACCGAGAAGAAGCGTGAAGAGGTGGTGGAGC  
TTCTGGAAAAGCTTCGCCCGTTGATGCTGATTAACAGTATCAAGTTCATT  
GCCTTCAATCCTACGTTTGTGTTTCATGGACCGCTACAGCTCCTCTGTTCAT  
CTCGCCATCCTGACCTCAGGCTTCAGCGTACTCACAATCCTCATCCTCA  
CTTTCTTCCCTGGTCATCAACCCCTTGGGAAACTTCTGGCTCATCCTCACG  
GTAACCTCTGTGGAGCTGGGCGTCTTGGGTTTGATGNNCTTTCACCAGTTTG  
AATGGCAGCCAGCTCTTAAGAATGTGTCTACATCGTGCAATGTTGGCATT  
ATTAATGGGCTTTCTGGATGGGCTTCCCTCGGTGGATGACGCTCCAGCTGA  
CACTATCACTCGGCGGTTTTCGCTATGATGTGGCACTGGTGTGAGCATTAA  
AGGATCTGGAGGAGGACATCATGGAGGGGCTGAGAGAGAGTGGGATGGAA  
GACAGTGCTTGCACCTCAGGCTTCAATGTGATGATCAAGGAATCTTGTGA  
TGGCATGGGTGATGTCAGCGAGAAGCACGGTGGAGGACCAGTTGTTCCCTG  
AGAAGCTGTACGTTACTCTTTTACTGTTATGAGTGTCTCTGTCTGCTGGAA  
GACGGTGAGGAG-----GAAGAGGT  
TACCATCTTACCCGAGCCAAAGCCAAACTCAGAAGTGTCTGTAAGCCCC  
TTTGCCTGACCTTTGTGGATGAGTCCGACCATGAGACACTCACAGCTGTC  
CTGAGCCCTATAATTGCAGAACGTAAGGCAATGAAAGAGAGCAGGCTCAT  
CCTGTCCATGGGTGGACTAGCTCGCTCCTTCCGCTTCCACTTCAGAGCCA  
CAGGATACGATGAGAAGATGGTGCCTGAGATGGAGGGCCTCGAGGCCTCA  
GGGTCCACCTATATCTGCACTCTTTGTGACTCCAGTCCGGCAGAGGCCTC  
TCAAAACATGGTGCTACACTCTGTCAACCCGACGTCATGAAGAGAACCCTAG  
AACGCTATGAAATATGGAGAACCAACCCCTTTTCTGAGTCTGCGGATGAG  
CTGCGAGACAGAGTCAAAGGTGTCTCTGCCAAGCCCTTCATGGAGACCCA  
GCCACACTGGATGCATTACACTGTGACATCGGAAATGCCACTGAGTTTT  
ACAAAATCTTCCAGGACGAGATTGGGGAGGTGTACCAAAGGT---CAAC  
---CCCAGCCGTGAGGAACGGCGCAGCTGGAGGGCAGCCCTAGATAAACA  
GCTGAGGAAGAAGATGAAGCTTAAACCGGTGATGAGGATGAATGGGAACT  
ATGCCCGCAGGCTAATGACCCAGGAGGCTGTGGAGGCGGTGTGTGAGCTG  
GTGCCCTCAGAGGAGAGGAGGGAGGCCCTGAGGGAGCTTGTGAGGCTCTA  
CCTCCAGATGAAGCCTGTGTGGCGTGCCACCTGCCAGCCAAAGAGTGCC  
CTGACCAGCTGTGCCGCTACAGCTTTAACTCCCAGAGCTTTGCCGACCTC  
CTCTCCTCTACTTTCAAATACAGGTACAATGGAAAAGATAACCAATTACCT  
CCACAAGACCCTGGCCCATGTGCCTGAAATCATAGAGAGAGATGGATCCA  
TAGGAGCCTGGGCTAGCGAAGGGAACGAGTCAGCAAACAANTCATACACCA  
TCGATATGGGTCCCTTGGGTCCCCGGTGGAAAGGAGAACCCACAGCCTTTT

TCCTGCTCCGTTGAAGACCCACAAAACAGACAAAAGTTCAAGGGCATCAA  
GACTTACATTTTCGTACCGGGTGACGCCGAGCCACACAGGGGATCCCGTCT  
ACAGGCGGTACAAACACTTTGACTGGCTATAACAACCGCTTACTGCACAAG  
TTCACTGTGATCTCTGTGCCTCACCTGCCTGAGAAGCAGGCYACGGGGCG  
ATTTGAGGAAGATTTTCATCGAGAAGCGTAAGAGACGACTGATTCTGTGGA  
TGAACCACATGACCAGTCACCCAGTCCTCTCCCAGTATGAAGGCTTTGAG  
CACTTTCTCATGTGTGCTGATGACAAGCAGTGGAAACTGGGCAAGAGACG  
GGCGGAGAAGGACGAGATGGTGGGTGCCATTTTCATGCTGACCCCTCAGA  
TCCCTAACGAGCACCAGGACCTTCAGGATGTAGAGGAGCGGATCGACTCC  
TTCAAGGCCTTTGCTAAGAAAATGGATGACAGCGTGATGCAGCTCACACA  
TGTTGCCTCTGAGCTGGTGCCTAAGCACCTGGGTGGGTTCAGGAAGGAGT  
TCCAGCGCCTGGGAAATGCCTTCCAGTCTATCAGCCAGGCCTTCATGCTG  
GACCCCTCCCCACAGTTCAGAAAACCTTCAACAACGCCATCTCCCATCCTCT  
CGCCACGTTCTCAAACCTGACCTCTCTGGGTTTCATCATTGGAGTAGGTG  
TGGTTGGAACCTCCTGATCTCCATCCTGCTGGTCAAAGACAAGAGCCTG  
CACCGAGCGCCCTACTACTTCTGTTGGACCTGTGTGCCTCTGATATCCT  
GCGCTCCGCCATCTGCTTCCCTTTGTCTTACCTCTGTCAAGAATGGAT  
CTGTCTGGACCTATGGCACGCTGACCTGCAAAGTGATCGCCTTCTGGGT  
GTGCTCTCTGTTTCCACACAGCGTTTATGCTGTTCTGTGTGTCAGTGTAC  
GCGCTACCTGGCCATCGCACATCACCGTTTCTACACCAAGAGGCTGACCT  
TCTGGACCTGTCTAGCTGTCTATCTGCATGGTGTGGACATTGTGAGTGGCT  
ATGGCGTTCCCGCCGGTGCTAGACGTAGGGACGTACTCTTTTATCCGGGA  
GGAGGACCAGTGCACATTCAGCACCGTTCTTCAGGGCGAATGATTCGC  
TGGGCTTCATGCTCCTGCTGGCGCTCATCCTCCTGGCCACACAGCTGGTT  
TACCTCAAGCTCATCTTCTTCGTCCACGACCGTCGAAAGATGAAGCCTGT  
CCAGTTCGTGCCTGCTGTGTCAGCCAGAAGTGGACCTTCCACGGGCCAGGCG  
CCAGCGGCCAGGCGGCGGCAACTGGCTAGCCGGATTTGGTTCGAGGCCCC  
ACCCCGCCTACTTTGCTGGGCATCCGGCAGAACAGCAACGCAGCGGGCCG  
CAGGCGTCTATTGGTATTGGATGAATTCAAAACAGAGAAGAGGATTAGTA  
GGATGTTCTACATCATGACGTTTTTCTTCTCCTGGCACTGTGGGGGCCCTAT  
CTGGTCGCTGCTACTGGCGGGTGTTCGCAAGGGGCCCTGTGGTCCCTGG  
AGGCTACCTGACCGCAGCTGTGTGGATGAGCTTTGCCAGGCTGGGGTCA  
ATCCTTTCATCTGCATCTTCTCCAACAGGGAGGCCAAATCTCGCTTTCAC  
CCTGGCATGGGGACTGGTCTTGGCACGGAGC---GCAGCGTCCCACTCGG  
CAACAGCTTGCTATCCCGCAGCAAAGCGAGGAGCCCACTGTTGCCACCC  
CCCCGCAGCGATGGTTTGTACCC---CTGCCAACAACCGACTGGACTTT  
GCTGCCTCGGCATACGACGCCGCT-----GATTTTGCCGGTAACGC  
GGCCACCTTGCTGTCTACGCAGCCGCCGGAGTGAAGGCTC-----TTC  
CCCTGCCGACTGCAGGCTGCTCCAACCGGCCTCTTGGCTATTACGCAGAC  
CCGTCAG---GCTGG---GGAGGACGCACGCCGCCGAGTACTGTGGCGT  
AAATAGCAAATCCAGCTCGGTCTTTCTCTGCTGGCCCCGCTAACTCTATCG  
GTGGCAGAGCGGGCA---CT---AACTACCTGG-----CTGAGGA-  
--GGGA---GACTC---CATCCCGACAGAGAGGTCACCG---AT---CGG  
CGGCTCGGAGGAG---ACCAAACCCAAAGACATAAC---GTCAGA---GT  
CGAGCTGGATAGAG---ACGCCGTCTCCATAAAAATCCATTGATTCGAGC  
GATTCTGGTATCTTTG---AACAGGCCAAAAGGAGAAGGATCTCACCTTC  
TGCCACGCCG-----GTTTCAGAGACAGTGTCCCCGTAAAAATCTG  
AGCATCACTCAACAGGCGAAGTCAACAGAGAGAGAAGTGGCGTTGGGGATA  
AATCCGTTTCGAGATGGGATGGGCGCCTTCAAAAATAAACCACAGCTCCCA  
CGATATTGGCTCCGG---ACAAACAGCGTTTTCTCCAGGCG---CCC  
GCTAC---GCAGCAGCCGCTCTGGGA---CACCATCA-----CCACCCG  
ACCCACGTTGGCTCT---TACTCCACGGCGGCTTTCAACTCCACCAGGGA  
CTTTCTCTTCCGAAATCGGGGCTTCGGGGACGCCACTGG-----

--GGCGCAGCACAGTTTGTTCGCCTC-----CGGAAGTTT---C---  
---GCAGGGCCACATGGACACTCGGATGCAGCGGGGCACCTGCTCTTCCC  
AGGGCTCCACGAG---CAAGCAGCGAGCCATGCGTCTTCCAACGTGGTCA  
ACAGCCAGATGCGATTGGGCTTCTCGGGGGACATGTACGGACGCGCCGAC  
CAGTATGGCCACGTTACAAGCCC GCGGT---CCGACCACTACGCTTCGAC  
CCAGCTGCACGGCTATGGTCCCATGAACATGAATATGGCCGCA---CACC  
ACGGAGCAGGGGCTTCTTTTCGATACATGAGGCAGCCCATCAAACAAGAG  
CTCATCTGCAAGTGGGTCGAGCCGGAGCAGCTGACGAATCCCCAAAAGGC  
GTGCAACAAAAC TTTTAGCACGATGCACGAGCTTGTGACCCATCTGACGG  
TGGAGCATGTGGGGGACCGGAGCAGACCAACCACATCTGCTTCTGGGAG  
GAATGCGCCAGAGAAGGAAAACCATTCAAAGCCAAATACAAACTTGTA  
TCATATCAGAGTACACACCCGGAGAAAAGCCCTTTCCGTGTCCGTTC  
GCTGTGGCAA

>Argentina silus

-----  
-----  
-----  
-----  
-----  
-----  
-----  
-----  
-----  
-----  
-----  
-----  
-----  
-----  
-----

-----TTTCTGGAGAGAAACCTGCATCCGTCCAACCTGCCTGGG  
GATGCTGCTGCTGTCGGATGCCACACGTGCACCAAGCTCTCCGAGCTCT  
CCTGGGCGATGTGCCCTCAGCAACTTCCCTGCCATCTGCAAGACGGAGGAC  
TTCTGTCAGCTGCCCAAGGACATGGTGGTTCAGCTCCTGTCCCACGAGGA  
GCTGGAGACTGAGGACGAGAGGCTGGTCTACGAGGCCGCTCTTAAC TGGG  
TCAACTACGACCTGGAGAGGAGGCACTGCCACCTGCCGGAGATGCTGAGG  
ACCGTCCGCCTGGCCCTGCTGCCCCGCATCTTCCCTCATGGAGAACGTGTC  
CACGGAGGAGCTGATCAACGCCCAAGTCAAGAGCAAGGAGCTGGTGGACG  
AGGCCGTCCGCTGCAAGCTGAAGATCCTGCAGAACGACGGCGTGGTCAAC  
AGCCTGTGCGCCCCGCCAGGAAGACCAGCCACGCCCTCTTCCCTGTGGG  
CGGCCAGACTTTCATGTGCGACAAGCTGTACCTGGTGGACCAGAAGGCCA  
AGGAGATTATCCCCAAGGCAGACATCCCCAAGCCCAGGAAGGAGTTCAGC  
GCCTGTGCCATCGGATGTAAGGTCTACGTACGGGGGAA--GGGGCTC-  
CGAGAACGGCGTGTCCAAGACGCTGTGGTCTATGACACCATCCAGGAGG  
AGTGGTCCAAGGCAGCGCCCATGCTCATCGCCCGT TGGCCATGGCTCA  
GCAGAGCTGAAACACTGCCTCTACGTGGTGGGGGGTCACACAGCTGCCAC  
AGGCTGTCTGCCCGCCTCGCCATCTGGAGGAGTACATAGTGGTGTTCAGC  
CGTTCCATTAAACAGGCTGATTCTTAATGAAGCAGAGCTGATTCTGGCCCT  
AGCACAGGAGTTCAGATGAAGGTGTAAC TGTGTCTCTGGAGGAGCAGT  
CCTTTGCCAGTATAGTGAAGATGGTCAGTGAGGCCCTCATGTTAGTCAGT  
ATGCACGGAGCCCAACTGGTGTCTCTCTTCCCTGCCAGGGGGGGCCGC  
AGTGGTGGAACTCTTCCCCTATGCAGTGAACCCAGAGCAGTACGCTCCCT  
ACAAAACCTTGGCCCTACTCCCTGGCATGGACCTGCAGTATGTGGCCTGG





-----GCCAAATCTCG  
CTTTCACCCTGGCGTAGGGACTGGTCCTGGCACAGACC---GCAGCGTCC  
CACTTAGTAACAGCTTGCTATCCCCGCAACAAACCGAAGAGCACACAGTT  
G---CTTCCCCGCAGCGATGGTTTGTACCC---CTGCCAATAACCGACT  
GGACTTTGCCGCTCGGCATACGATGCCGCCGGCTGCTGATTTTGCCG  
GTAACGCGGCCACCTTGCTGTCTACGCAGCGGCTGGAGTAAAAGCAC--  
----TTCCCCTGCCACTGCTGGGTGTTCAAATAGACCTTTGGGTATTA  
TGCCGACCCATCAG---GCTGG---GGCACCCGCACACCACCTCAGTACT  
GT-----AGTAAATCCAGCTCAGTGCTCTCGTGCTGGCCACAAAT  
GCTGTTGGAAGCAGAACAGGCA---CGTCCAATTACCTGA-----C  
GGAGGA---TGGG---GACAC---CATCCCTACGGAGAGGTCTCCA---A  
T---CGGAGTGCCAGAGGAG---ACAAAACCGAAAAGACTT-----GTCC  
GA---ATCCAGCTGGATAGAG---ACGCCGTCTTCAATAAAGTCGATAGA  
TTCAAGTGATTCTGGAATCTTTG---AGCAGGCCAAACGGAGAAGAATTT  
CACCGTCTGCCACACCG-----GTTTCGGAGACAGTGTCCCCGCTG  
AAATCAGAG-----ACAGGCGAAGTCACAGACAGAGAAGTGGCTTT  
GGGGATAAATCCGTTTCGACAGACGGGATGGGCGCTTTTAAAATCAACCACA  
GCTCTCATGATCTTGGCTCCGG---GCAAACGGCGTTTTCTCCAAGCG  
---CCCGGCTAC---GCAGCCGCTGCCTTGGGA---CATCATCA-----  
CCATCCGACCCATGTCAGCTCC---TACTCCACCGCCGCTTTCAATTCCA  
CCCGGGACTTTCTTTTTCGAAATCGGGGCTTCGGAGACGCGACCAG----  
-----CGCCCAACACAGTCTCTTCGCCTCCGC---AGCGGGAAGTTT  
---T-----GCAGGGCCACATGGACACTCAGATGCCGCGGGACACCTGC  
TCTTCCCAGGACTTCACGAG---CAAGCCGCGAGCCATGCGTCTCCAAT  
GTTGTAAACAGTCAGATGCGATTGGGTTTTTTCGGGGGACATGTACGGGCG  
GGCTGACCAATATGGCCATGTTACGAGCCACGTT---CCGACCCTACG  
CTTCGACCCAGTTGCATGGCTATGGCCCCATGAACATGAATATGGCCGCA  
---CACCACGGAGCAGGGCCTTCTTCCGTTACATGAGGCAGCCGATCAA  
ACAAGAGCTCATCTGCAAGTGGGTCGAGCCGGAGCAGTTGTGCAACCCGA  
AAAAGTCGTGCAACAAAACCTTTCAGCACGATGCACGAGCTCGTGACCCAC  
CTGACAGTGGAAACATGTGGGGGGACCAGAGCAGTCGAACCATATTTGCTT  
TTGGGAAGAGTGTGCCGAGAAGGAAAACCATTCAAAGCTAAATACAAAC  
TTGTAAATCATATCAGAGTACACACCCGGAGAAAAACCGTTCCCATGTCCA  
TTCCCCGGCTGTGGCAA

>Argyropelecus affinis

AGCTTACTCATCCGGGCAGAACTGAGTCAACCTGGCGCCCTCATGGGCGA  
TGACCAAATCTACAATGTCCTAGTTACAGCACATGCTTTTGTAATAATCT  
TCTTCATAGTAATAACCCATCATAATTGGAGGTTTCGGAAACTGGTTAGTC  
CCACTTATAATTGGTGCCTCAGATATGGCGTTTCCCGAATGAATAACAT  
AAGCTTTTGACTCCTTCCTCCCTCCTTTCTTCTTCTACTTGCCCTTTCGG  
GTGTTGAAGCTGGGGCCGGAACCGGGTGGACTGTTATCCCCCTCTTTCC  
AGCAACTTAGCTCATGCAGGCGCTCCGTTGATTTGACCATCTTCTCCCT  
TCACCTCGCCGGTATCTCCTCTATCCTTGGGGCCATTAACCTTTATTACCA  
CAATTATTAATAAAAACCCAGCCATCTCTCAATACCAAACGCCCTT  
TTCGTTTGATCTGTTCTTGTACCCGCGTACTTCTTCTTCTCCTTGCC  
CGTCTTAGCCGCTGGTATTACAATACTTTTAAACAGATCGGAACCTAAACA  
CAACCTTTTTTGACCCGGCAGGAGGGGAGATCCCATTCTCTACCAACAC  
CTTTTCTGATTCTTTGGACACCCAGAAGTATATATCCTTATTCTCCAGG  
CTTTGGTATAATTTCCACATTGTTGCATATTACTCAGGGAAAAAAGAAC

CCTTTGGATATATAGGAATAGTCTGAGCTATAATAGCCATTGGTCTCCTA  
GGTTTTATTGTCTGAGCCCATCACATATTTACAGTTGGAATGGATGTGGA  
CACCCGAGCTTNTTCTGGAGAGGAACCTGCACTCGTCCAACCTGCTGGGA  
ATGCTGCTTCTCTCAGACGCCCATCAGTGTACCAAGCTGTCTGAGCTGTC  
CTGGGGCATGTGCCTCAGCAACTTTCCCGCCATTTGCAAGACCGAGGACT  
TCCTGCAGTTGCCCAAAGACATGGCGGTCCAGCTGCTGTCTCACGAGGAG  
CTGGAGACGGAGGACGAGAGGCTGGTCTACGAGGCCGCCCTTAACTGGGT  
CAACTACGACCTGGAGAGGCGGCACCTGCCACCTGCCGGAGCTGCTGAGAA  
CTGTTTCGTCTGGCCTTGCTGCCTGCCATCTTCCCTCATGGAGAATGTCTCC  
ACAGAGGAGCTGATCAATGCCAGACCAAGAGCAAGGAGTTGGTGGACGA  
GGCCATCCGCTGCAAGCTGAGGATCCTGCAGAACGAGGGCGTGGTCAACA  
GCCCCGCTGGCCCCGCCAGGAAGACCAGCCACGCTCTCTTCCCTGCTGGGT  
GGGCAGACCTTCATGTGTGATAAACTCTACCTGGTGGACCAGAAGGCCAA  
GGAGATCATCCCCAAGGCAGACATCCCTAGCCCCAGGAAGGAGTTCAGCG  
CCTGCGCAATCGGCTGCAAGGTCTACATCACCGGAGGCA--GGGGCTC-T  
GAGAACGGGGTCTCCAAAGATGTTTGGGTCTACGATACGTCCCATGAGGA  
GTGGTCGAAGGCGGCTCCCATGCTCATCGCCGATTCGGCCATGGTTCYG  
CAGAACTCAAACACTGCCTCTACGTGGTGGGCGGACACACGGCCGGCACA  
GGCTGCCTCCCCGCGTCCCCCTCG-----

-----AAGAGGGATCCCAGCAAGGGAACCTTGGAGGATCAAATCA  
TCCAAGCCAACCTGCCCTGGAGGCTTTTCGGTAACGCCAAAACATGAGA  
AATGACAACCTCATCACGCTTTGGCAAATTCATTCGCATTTCATTTGGAAC  
CAGTGGCAAGTTATCCTCTGCAGACATAGAGACTTACCTTCTGGAAAAGT  
CACGTGTCACCTTTCAGCTCAAGTCAGAGAGGAACTATCACATCTTCTTC  
CAGATCTTGTCCAATCAAAGCCAGAGCTGTTGGACATGCTTTTAATCAC  
CAACAATCCCTACGACTACTCCTTCATCTCCAAGGAGAGGTAACAGTAG  
CGTCCATCAATGATTCAGAGGAGTTGATAGCCACTGACAGTGCATTTGAC  
GTGCTCGGCTTTACTCAAGAGGAGAAAATGGGGTCTACAAGTTGACAGG  
TGCGATCATGCATTATGGCAACATGAAGTTCAAGCAAAGCAGCGCGAGG  
AGCAGGCAGAACCTGATGGCACTGAGGCTGCTGACAAGGTAGCTTACCTA  
ATGGGGCTGAACTCTGCAGATCTAGTGAAGGACTCTGTTCATCCAGGGT  
GAAGGTCGGTAATGAGTTTGTCACTAAAGGGCAGAGTGTAGACCAAGTCA  
ACTACCCAACAAGGAGGCCTTCAAGTGTGAGGAGTGTGGCAAGCACTAC  
AACACCAAGCTGGGCTACAAGCGCCATGTGGCCATGCACTCGGCCACGGC  
GGGCGACCTCACCTGCAAGGTGTGCCCTGCAGAGCTACGAGAGCACACCCG  
CCCTGCTGGAGCATCTGAAGAGCCACTCCGGGAAGTCGTGGGCGGGGCC  
AAGGAGAAGAAGCACCCGTGCGACCACTGCGACCGCCGTTTCTACACAG  
CAAGGACGTGAGGCGCCACATGGTGGTGCACACCGGCCGCAAAGACTTCC  
TGTGCCAGTACTGCGCCAGCGCTTGGCAGGAAGGACCATCTGACACGG



CACGTGAAGAAGAGCCACTCGCAGGAGCTGCTGAAGATCAAAGCGGAGCC  
TCCGGATATGCTGGGGCTGCTGGGGTCTGGCTCGCCGCCCTGCTCTGTCA  
AAGAGGAGCTCAGCCCCATGATGTGCAGCATGGGTCCCTCCAAGACCCC  
CTGATGGCCAAGCCTTTCCCCAGCGGGACCCCTTCCCCATGGGCATGTA  
CAACCCCCACCAC-----CTGCAGGCCATGTCCGGCCCTGGGGGGGGCC  
AC-----CACCCTCCCTGATGCCCGGCTCCCTGTCTGCGGCTATG  
GGCATGGGCTGCCACATGGAC-TACTGATCTACGCCCTCCTTCTCCTTCAT  
GGGCTGCTTGCAGATCAGCGACGGGTCCAACGTGGTCAACCTGTTAGCCA  
GCAACTCCCCGAGTGTGTCTACGCGCTGACCCAACAGAAGTACTTCAGC  
AACTACAGCCCTGTGATCGGGTCTACATCTACGAGCCCATAGAGTACTG  
GAACTCCACGGTGCAGGAGCACCTGAGGACACTGGGCCACGGCTTCAACA  
AGATCTCCTGGATGGACAATACTTTACTACCTGAAGGCGATGAACGCG  
ACCGCTCCACGAAGGCCGACTTTCATCAGCATCCTCAAGGGTTCGTTCCT  
GAGGAGCCCGGAGTACCAGCACTTCACGGAGGACATCATCTTCTCGAAGA  
---ACGGCG-----AGGAGTACGACATCATCGCGTCCCGGATG  
TACCTGGTGGCGCGCACCACAGAGAAGACCCGGGAGGAGGTGGTGGAGCT  
GCTGGAGAGGCTCCGCCCGCTTTCCCTCATCAACAGCATCAAGTTCATCG  
TCTTCAACCCACCTTCGTGTTTATGGACCGCTACAGCTCCTCGGTCATT  
TCACCCATCCTCACGTCAGGCTTCAGTGTCTCACCATCCTCATCCTCAC  
CTTCTTCTCGTCATCAACCCCTCGGGAACTTCTGGTTGATCCTGACGG  
TGACCTCGGTGGAACGGGCGTCTGGGCCTGATGGGCTACCACCCCTTT  
GAGTGGCAGCCGCCCTCAAGAATGTGTCCACGTCCCGCAGGTGGGCAT  
CATCAACGGGCTGTCAGGGTGGGCTGCCTCTGTAGATGACTCCCTTGTGG  
AAACCGTCAACCGCGCTTCCGCTACGACGTGGCGCTGGTGTGAGCTCTG  
AAGGACCTAGAGGAGGACATCATGGAGGGGCTGCGGGAGCGCGCCCTGGA  
GGACAGCGCCTGCACCTCAGGCTTCAGCGTGATGATCAAAGAGTCCCGC  
ACGGCATGGGGACGTCAGTGAGAAGCACGGCGGGGGCCGGCGGTGCCT  
GAAAAGGCTGTGCGGTTCTCTTTCCACCATCATGTCTGTGTCTGTCCAGGC  
TGAGGATGAGGAT-----GAGGCTG  
TTACTGTCTTCAGGGAGCCCAAGCCCAACTCTGAGCTGTCTGCAAGCCT  
CTCTGTCTGATGTTTGTGGACGAGTCTGATCATGAGACGCTGACAAGCAT  
CCTTTGGCCTGTGGTGGCTGAGAGGAACGCCATGAAGAACAGCCGCCTCA  
TTCTGTCTTGGGAGGTCTCCCTCGATCCTTCCGCTTCCACTTCAGGGGT  
ACAGGCTATGACGAAAAGATGGTGCCTGAGATGGAGGGCCTGGAGGCCTC  
AGGTCCACATACATCTGCACTCTCTGTGACTCCACCCGGGCAGAGGCCT  
CCCACAACATGGTGTCTCACTCCATCACTCGCAGCCACAACGAGAACCCTG  
GAGCGCTATGAGATCTGGAGGACCAACCCCTACTCTGAGTCCGCAGATGA  
GCTTCGGGATCGGGTGAAGGAGTCTCTGCCAAACCTTCATGGAGACCC  
AGCCACCCTGGATGCTCTGCACTGTGACATTGGTAACGCCACTGAGTTC  
TACAAGATATTTAGGATGAGATCGGGGAGGTGTACCGGAGGCC---GAA  
C---CCAAGCAGGGAGGAGCGCCGGAGCTGGCGGGCTGCTCTGGACAAGC  
AGYTGAGGAGGAAGATGAAGCTGAGGCCAGTGATGAGGATGAATGGGAAC  
TATGCCCGCGGCTGATGACCAGCGAGGGGTGGAGGTGGTGTGTGAGCT  
GGTACCCTCAGAACAGCGGGGGAGGCCCTCAGGGAACCTGATGGGGCT--  
-----  
-----  
-----  
-----  
-----TCCTACAC  
AATCGAAATGGGCCCAAAGGGCCTCAGTGGAAAGGAGAGCCCTCAGCCGT  
TCTCTTGTCTGTTGAGGACCCTACCAAACAGACCAAGTTCAAAGGCATC  
AAGACCTACATATCTTACCGGGTCAACCAAGCCACACCGGGCGACCTGT  
ATACCGTCCGTACAAGCATTTTGATTGGCTATAACAACCGCMTGCTGCATA

AGTTCACTGTCATCTCTGTGCCTCACCTGCCGGAGAAGCAAGCCACAGGG  
CGTTTCGAGGAGGACTTCATCGAAAAGCGCAAAGGAGGCTGATCCTCTG  
GATGGACCACATGACCAGTCACCCAGTCCTCTCCCAATATGAGGGCTTTG  
AGCACTTCCTCATGTGCGCTGATGACAAACAGTGGAAGCTGGGCAAGCGG  
CGAGCGGAGAAGGATGAAATGGTGGGCGCCCACTTCATGCTGACCTTTCA  
GATTCCCAAAGAGCACCAGGACCTGCAGGATGTGGAGGAGAGAGTGGACT  
CCTTCAAGTCTTTTGCTAAGAAAATGGATGATAGTGTTCATGCAGCTGACT  
CACGTGACCTCAGAACTGGTGGGAAACATCTAGGGGGTTTCAGAAAGGA  
ATTCCAGCGTCTGGGGAACGCTTCCAGTCCATTAGTCAGGCATTCACGC  
TGGACCCTCCTCACTGCTCTGAAGCCCTCAACAACGCCTTCTCACAC---

-----  
-----  
-----  
-----  
-----  
-----  
-----  
-----  
-----  
-----  
-----  
-----  
-----  
-----  
-----  
-----  
-----  
-----  
-----  
-----  
-----  
-----

-----GCCAAGTCTCGCTTTC  
ACCCTGGCGTAGGGACTGCCCTGGCAGCGACC---GCAGCATCCCCTT  
AGTAACAGCTTGCTATCGCCCCAACAAACCGAAGAGCCCACGGTTG---C  
TTCCCCGCAGCGATGGTTTTGTCAGCC---CTGCCAACAAACAGACTGGACT  
TTGCCGCCTCGGCATACGATGCTGCTGCTGCTGCAGATTTTGCAGGAAAC  
GCAGCCACCTTGTTGTCCTACGCAGCAGCTGGAGTGAAGGCAC-----T  
CCCCCTGTCCACGGCTGGTTGCTCAAACAGACCTCTTGGGTACTATACTG  
ACCCATCAG---GCTGG---GGCGCCCGCACACCACCACAGTACTGC---  
-----AGCAAGTCCAGCTCTGTTCTCTCTTGCTGGCCCAAAATACTGT  
TGGGGGCAGAACTGGCA---CCTCCAATTACCTGG-----CTGAGG  
A---TGGG---GATGC---CCTCCCACAGAGAGGTCTCCA---AT---A  
GGCACGTCAGACGAA---GCGAAACCAAAGACCT-----GTCGGA---  
ACCCAACCTGGATAGAG---ACGCCGTCCTCAATCAAGTCGATTGATTCAA  
GTGATTCCTGGTATCTTTG---AGCAGGCAAACGGAGAAGAATCTCTCCC  
TCTGCCACACCA-----GTTTCAGA---TGTTTCCCCGTTGAAATC  
CGAG-----

-----  
-----  
-----  
-----  
-----  
-----  
-----  
-----  
-----  
-----

>Argyropelecus gigas

AGCCTACTTATCCGGGCAGAACTAAGCCAACCCGGCACCCCTCATAGGTGA  
TGACCAAATCTATAATGTTCTCGTTACAGCACATGCTTTCGTAATGATTT  
TCTTCATGGTAATACCTATTATAAATGGGGGCTTCGGAAACTGACTAGTC  
CCATTAATAATTGGCGCCCCTGACATAGCATTTCACGAATAAACAATAT  
AAGCTTCTGACTCCTCCCCCATCTTTCCTTCTTCTCCTTGCCCTCCTCAG  
GCGTTGAAGCTGGGGCCGGGACAGGGTGAAGTGTTCACCCCTCTTTCC  
AGCAACTTAGCACATGCAGGCGCTCAGTAGACTTAACTATCTTCTCCCT  
ACATCTCGCAGGCATCTCTTCCATTCTAGGGGCAATCAACTTTATTACTA  
CAATTATCAACATAAAACCTCCAGCCATCTCTCAATACCAAACACCTCTT  
TTCGTGTGATCAGTTCTTGTAACTGCTGTACTTCTTCTCCTTTTCCCTTACC  
AGTCCTAGCTGCCGTTATTACAATACTTTTAACTGACCGAAACCTAAACA  
CAACATTCTTTGACCCCGCAGGAGGAGACCCCATCTTATAACCAACAC  
CT-----

-----TTCCTGGAGAGGAACCTGCACTCGTCCAACCTGTCTGGG  
AATGCTGCTTCTCTCAGACGCCATCAGTGTACCAAGCTGTCTGAGCTGT  
CCTGGGGCATGTGTCTCAGCAACTTTCCCGCCATTTGCAAGACCGAGGAC  
TTCCTGCAGTTGCCCAAAGACATGGCGGTCCAGCTGCTGTCTCACGAGGA  
GCTGGAGACGGAGGACGAGAGGCTGGTCTACGAGGCTGCCCTTAACTGGG  
TCAACTACGACCTGGAGAGGCGGCATGCCACCTGCCGAGCTGCTGAGA  
ACTGTTCTGCTGGCCTTGCTGCCCGCCATCTTCCTCATGGAGAATGTCTC  
CACAGAGGAGCTGATCAATGCCCAGACCAAGAGCAAGGAGTTGGTGGACG  
AGGCCATCCGCTGCAAGCTGAGGATCCTGCAGAACGAGGGCGTGGTCAAC  
AGCCCGCTGGCCCGGCCAGGAAGACCAGCCACGCTCTCTTCTGCTGGG  
TGGGCAGACCTTCATGTGTGATAAACTCTACCTGGTGGACCAGAAGGCCA  
AGGAGATCATCCCCAAGGCAGACATCCCTAGCCCCAGGAAGGAGTTCAGC  
GCCTGCGCCATCGGCTGCAAGGTCTACATCACCGGAGGCA--GGGGCTC-  
TGAGAACGGCGTGTCCAAGATGTTTGGGTGTACGATACCTCCCATGAGG  
AGTGGTTCGAAGGCGGCTCCCATGCTCATCGCTCGATTTCGGCCATGGTTCC  
GCTGAACTCAAACACTGCCTCTAYGTGGTGGGAGGACAGACTGCCGCCAC  
NNNNNNNNNNNNNNNNNNNNNNNNNNNNNNNN-----



CACCATCATGTCTGTGTCTGTCCAGGCTGAGGATGAGGAT-----  
-----GAGGCTGTACTGTCTTCAGGGAGCCCAAG  
CCCAACTCTGAGCTGTCGTGCAAGCCTCTCTGTCTGATGTTTGTGGACGA  
GTCTGATCATGAGACGCTGACAGGCATCCTTGGGCCTGTGGTGGCTGAGA  
GGAACGCCATGAAGAACAGCCGCCTCATTCTGTCTCTGGGAGGTCTCCCT  
CGATCCTTCCGCTTCCACTTCAGGGGTACAGGCTATGACGAAAAGATGGT  
GCGTGAGATGGAGGGCCTGGAGGCCTCAGGTTCCACATACATCTGCACTC  
TCTGTGACTCCACCCGGGCAGAGGCCTCCCACAACATGGTGCTTCACTCC  
ATCACTCGCAGCCACGACGAGAACCCTGGAGCGCTATGAGATCTGGAGGAC  
CAACCCCTACTCTGAGTCCGCAGATGAGCTTCGGGATCGGGTGAAAGGAG  
TCTCTGCCAAACCCTTCATGGAGACCCAGCCACCCTGGATGCTCTGCAC  
TGTGACATCGGTAACGCCACTGAGTTCTACAAGATATTTTCAGGATGAGAT  
CGGGGAGGTGTACCGGAGGCC---GAAC---CCAAGCAGGGAGGAGCGCC  
GGAGCTGGAGGGCTGCTCTGGACAAGCAGCTGAGGAGGAAGATGAAGCTG  
AGGCCAGTGATGAGGATG-----

-----TCCTACACAATCGAAATGGGCCCAAAGGGC  
CTCAGTGGAAGGAGAGCCCTCAGCCGTTCTTGTCTGTTGAGGACCCT  
ACCAAACAGACCAAGTTCAAAGGCATCAAGACCTACATATCTTACCGGGT  
CACCCCAAGCCACACTGGGCGACCTGTATACCGTCGGTACAAGCATTTTG  
ATTGGCTATAACAACCGCCTGCTGCATAAGTTCACTGTCATCTCTGTGCCT  
CACCTGCCGGAGAAGCAGGCCACAGGGCGTTTCGAGGAGGACTTCATCGA  
AAAGCGCAAAGGAGGCTGATCCTCTGGATGGACCACATGACCAGTCACC  
CAGTCTCTCCCAATATGAGGGCTTTGAGCACTTCTCATGTGCGCTGAT  
GACAAACAGTGGAAGCTGGGCAAGCGGCGAGCGGAGAAGGATGAAATGGT  
GGGCGCCCACTTCATGCTGACCTTTCAGATTCCCAAAGAGCACCAGGACC  
TGCAGGATGTGGAGGAGAGAGTGGACTCCTTCAAGTCTTTTGCTAAGAAA  
ATGGATGATAGTGTTCATGCAGCTGACTCACGTGACCTCAGAACTGGTGCG  
GAAACATCTAGGGGGTTTCAGAAAGGAATTCAGCGTCTGGGGAACGCTT  
TCCAGTCCATTAGTCAGGCATTACAGCTGGACCCCTCCTCACTGCTCTGAA  
GCCCTCAACAACGCCATCTCACAC-----



CATGCTGTTGCTGTCTGACGCCACCAGTGTACCAAGCTGTCAGAGCTCT  
 CCTGGGCGCATGTGTCTAAGCAACTTCCCTGCTATTTGCAAGACAGAAGAT  
 TTCCCTCCAAGTCCAAAAGATATGGTGGTGCAGCTTTTGTACACGAGGA  
 GCTGGAGACAGAAGATGAGAGACTGGTTTATGAAGCTGCACTGAATTGGA  
 TCAACTATGACCTGGAAAGGAGGCACTGCCATCTTCCAGAGCTCCTGAGA  
 ACGGTCCGCCTCGCCCTGCTTCCCTGCCATCTTTTAATGGAGAACGTTTC  
 GACAGAAGAAGTATCAATGCCAGGCAAAGAGCAAGGAAGTGGTGGACG  
 AAGCTATTTCGCTGTAAGCTGAAGATCTTGCAGAATGATGGCGTCGTTAAC  
 AGCCCTTGTGCTCGGCCAAGAAAAACCAGCCATGCCCTCTTTCTTCTTGG  
 CGGGCAGACTTTTCATGTGCGACAAGTGTACCTGGTGGACCAGAAGGCCA  
 AAGAGATAATTCCCAAAGCGGACATTTCCAGTCCCAGGAAGGAGTTCAGC  
 GCCTGTGCCATTGGTTGTAAGGTGTACATCACTGGCGGAA--GAGGATC-  
 GGAGAATGGTGTGTCCAAAGATGTGTGGGTCTACGATACGGTCCATGAAG  
 AATGGTCAAAGGCTGCACCCATGCTCATCGCCAGGTTTGGCCATGGATCT  
 GCAGAGCTAAAGCACTGCCTCTACGTCTGGGTGGACACACTGCGGCAAC  
 TGGCTGCCTCCCGCTTCTCCGTCG-----

-----  
 -----  
 -----  
 -----  
 -----  
 -----  
 -----  
 -----  
 -----  
 -----  
 -----  
 -----  
 -----  
 -----  
 -----  
 -----  
 -----

-----AAAAAAGACACCAGCAAGGGAACACTGGAAGATCAAATC  
 ATCCAGGCGAACCCAGCACTGGAGGCCTTCGGCAACGCCAAGACGGTGAG  
 AAACGACAATTCATCTCGCTTCGGAAAGTTCATCCGAATTCCTTTGGGA  
 CAAGCGGGAAGCTGTATCAGCTGATATTGAGACGTACCTGCTTGAGAAG  
 TCCCCTGTGACCTTTCAGCTCAAGGCTGAGAGGAACACCACATCTTCTA  
 TCAGATCCTGTCCAATGAGAAGCCGGAGCTCCTGGACATGCTGCTCATCA  
 CCAACAATCCATACGACTACTCCTACATCTCCCAAGGAGAGGTAACGGTT  
 GCCTCCATCAATGACTCAGAGGAGCTGATAGCCACCGACAGCGCCTTTGA  
 CGTGCTTGGCTTACCGCTGATGAGAAGATGGGTGTCTACAAACTGACTG  
 GTGCCATCATGCACTACGGCAACATGAAGTTCAAACAGAAGCAGCGCGAA  
 GAGCAGGCTGAGCCTGATGGGACTGAGGCTGCCGATAAATCGGCTTACCT  
 GATGGGACTGAACTCCGCAGACCTCATCAAAGGCTCTGTCTCATCCCAGAG  
 TCAAGGTGGGAAATGAGTATGTGACCAAGGGCCAAAGTGTGGATCAAGTC  
 TACTATCCGAACAAGGAGGCCTTCAAGTGTGACGAGTGCGGGAAGCACTA  
 CAACACCAAGCTGGGATAACAAGCGCCATGTGGCCATGCACTCTGCCACTG  
 CCGGGGATCTAACCTGTAAGGTGTGCATGCAGAGCTACGAGAGCACGCCA  
 GTCCCTGAGGACCTGAAGAGTCACTCGGGGAAATCTTCGGGCGGAGC  
 CAAGGAGAAGAAGCACCTTGTGACCACTGTGACCGACGTTTCTACACCC  
 GGAAGGACGTGAGACGGCACATGGTGGTGCACACAGGTCGTAAGGATTTCT  
 CTGTGCCAGTACTGCGCCAGCGCTTCGGCAGGAAAGACCACCTGACGCG  
 GCACGTGAAGAAGAGCCACTCTCAGGAGCTCCTGAAGATCAAGACAGAGC  
 CTCCAGACATGTTGGGTCTGTTGGCGTCAGGGTCTTCTCCATGTCCCTGTC  
 AAGGAGGAGCTCAGCCCCATGATGTGTGCCATGGCGCCCAACAAAGACCC





ATGAGATGGTGGGTGCCATTTTCATGCTGACCCTCAAATCCCCAATGAG  
CACCAAGATCTTCAGGATGTTGAGGAGAGAGTTGACAACTTCAAGGTCTT  
TGCCAAGAAAATGGATGACAGTGTGATGCAGCTTACTCATGTTGCCTCGG  
AGCTGGTGCCTAAACATCTGGGTGGATTTAGGAAGGAGTTCCAGCGGCTG  
GGAAATGCCTTCCAGTCTATAAGTCAGGCATTCCAACCTGGACCCTCCACA  
TAGGTCAGACACCCTCAACAATGCCATNNNNNNNNNNNNNNNNNNCGTTCCTCAAACCTGACCTCTCTG  
GGTTTCATCATTGGAGTCGGTGTGGTAGGGAACCTCCTGATCTCCATCTT  
GCTGGTCAAAGACAAGAGCCTGCACCGAGCACCCTACTATTTTCTGTTGG  
ATCTGTGTGCGTCTGACATCCTGCGCTCTGCCATCTGCTTCCCCTTTGTCT  
TTCACTTCCAGTAAAGAATGGATCTGCCTGGACCTACGGCAGCTGACCTG  
CAAAGTGATTGCCTTCCCTGGGTGTGCTTTCCTGTTTCCACACAGCATTCA  
TGCTGTTTTGTGTGCTGAGTGTACCCGCTACCTGGCCATCGCTCATCACCGT  
TTCTACACCAAGAGGCTGACTTTTTGGACGTGTCTAGCCGTCATCTGCAT  
GGTGTGGACATTGTGCTGAGTGGCTATGGCATTCCCACCGGTGCTCGACGTAG  
GGACGTACTCTTTTATCCGGGAGGAGGACCAGTGCACATTTTCCAGCACCGT  
TCCTTCCAGGGCGAATGATTCACTGGGCTTCATGCTCCTGCTGGCGCTCAT  
CCTCTTGGCCACACAGCTGGTTTACCTCAAACCTCATTTTCTTTCGTCCATG  
ACCGTCGAAAGATGAAGCCTGTCCAGTTCGTGCCTGCCGTCAGCCAGAAC  
TGGACCTTCCATGGGCGGGTGGCCAGCGGGCAGGCAGCAGCCAACTGGCT  
GGCTGGATTTGGTTCGAGGCCCCACCCCTCCTACTTTGCTGGGGATCCGAC  
AGAACAGCAACGCAGCGGGCCGACAGCTCTACTTGTATTGGATGAATTC  
AAAACAGAGAAGAGGATTAGTAGGATGTTCTACATCATGACGTTTTTCTT  
CCTGGCTCTGTGGGGCCCTACCTGGTTGCCTGCTACTGGCGAGTGTG  
CAAGGGGCCCGTGGTCCCTGGAGGCTACTTGACAGCAGCTGTGTGGATG  
AGCTTTGCCCAGGCTGGGGTCAACCCTTTCATCTGCATCTTCTCCAACNNNNNGC  
CAAATCTCGCTTTCACCCTGGCATGGGACTGGTCTGGCACGGAGC---  
GCAGCGTCCCACTCGGCAACAGCTTGTGTCCCCGCAGCAAACCGAGGAG  
CCCCTGTTGCCACCCCCCGCAGCGATGGTTTGTACCC---CTGCCAA  
CAACCGACTGGACTTTGCTGCCTCGGCATACGACGCCGCT-----G  
ATTTCCGCGGTAACGCGGCCACCTTGTGTCTTACGCAGCGGGCCGGAGTG  
AAGGCTC-----TCCCCCTGCCGACTGCGGGCTGCTCCAACCGGCTCT  
TGGCTATTACGCAGACCCGCTCTG---GCTGG---GGAGGACGCACGCCGC  
CGCAGTACTGCGGCGTAAACACTAAATCCAGCTCGGTGTTTTCTGCTGG  
CCCCCAACTCCATCGGTGGGAGAGCGGGCA---CC---AACTACCTGT-  
-----CCGAGGA---GGGA---GACTC---CCTCGCCACGGAGAGGT  
CGCC---AT---CGGTGGCTCGGAGGAG---ACGAAACCCAAAGACATG  
AC---ATCCGA---GTCGAGCTGGATAGAG---ACGCCATCCTCCATTAA  
ATCCATCGACTCGAGCGATTCTGGGATCTTTG---ACAAGCCAAACGGA  
GGAGGATCTCACCTTCTGCCACACCG-----GTTTCAGAGGCAGTG  
TCCCCGCTAAAATCTGAGNNNNNNNNNNNGGGGAAGTCACAGAGAGAGAAGTGGCGCTGGG  
GATAAACCCGTTTCGCGGATGGGATGGGCGCCTTCAAATAAAACACAGTT  
CCCACGACATCGGCTCCGG---ACAGACGGCGTTCCTCCTCCAGGCG---  
CCCGGCTAC---GCGGCGGCTGCCCTGGGA---CACCACCA-----CCA  
CCCGACCCACGTTGGCTCC---TACTCCACGGCGGCGTTCAACTCCACCA  
GGGACTTTCTTTTCAGAAACAGGGGCTTCGGAGATGCCGCGG-----  
-----GGCGCAGCACAGCCTGTTGCTC-----CGGAAGTTT---  
C-----GCAGGGCCACATGGACACTCAGATGCAGCGGGGCACCTGCTCT  
TCCCAGGGGCTGCACGAG---CAAGCGGCCAGCCACGCGTCTTCCAACGTG  
GTCAACGGCCAGATGAGGCTGGGCTTCTCGGGGGACATGTACGGACGGGC  
CGAGCAGTACGGCCACGTTACGAGCCCACGAT---CCGACCACTACGCT  
CCACTCAGCTGCACGGCTACGGCCCCATGAACATGAATATGGCCGCG---  
CACCACGGAGCGGGGGCCTTCTTTCAGATACATGAGGCAGCCCATCAAACA  
AGAGCTCATCTGCAAGTGGATCGAGCCGGAGCAGCTGACGAACCCCAAAA

AGTCGTGCAACAAAACCTTTTCAGCACGATGCACGAGCTGGTGACCCACCTG  
ACTGTGGAGCATGTGGGGGACCGGAGCAGACCAACCACGTCTGCTTCTG  
GGAGGACTGCTCCAGAGAAGGGAAGCCCTTCAAAGCCAAATACAACTTG  
TGAATCATATCAGAGTACACACCCGGAGAAAAACCTTTCCGTGTCCGTT  
CCTGGTTGTGGCAA

>Assurger anzac

AGCCTCCTCATCCGAGCTGAACTGAGCCAACCAGGCTCTCTTCTCGGAGA  
CGACCAGATTTATAATGTGATTGTTACGGCGCACGCGTTCGTAATAATTT  
TTTTTCATAGTAATACCCGTTATGATTGGAGGGTTCGGAACTGACTCATC  
CCTCTAATGATTGGGGCCCCAGACATGGCCTTCCCACGAATGAACAACAT  
GAGTTTCTGGCTTCTGCCCTTCTTTCCTCCTCCTCCTGGCCTCCTCCG  
GGGTAGAAGCTGGGGCTGGTACCGGTGAACCGTGTACCCTCCCTGGCA  
AGCAACCTTGCCACGCAGGGGCTTCGTTGATTTAACTATTTTCTCCCT  
TCACCTCGCAGGGATCTCCTCGATCCTGGGGCCATTAACCTTTATTACAA  
CAATTGTTAACATAAAAACCCGCGACTATTACGCAATTCCAAACCCCGCTA  
TTTGTGTGATCCGTCCTAATTACAGCTGTGCTCCTACTACTATCTCTGCC  
GGTTCTTGAGCCGGAATTACAATACTCCTCACAGACCGCAACCTTAATA  
CAACCTTCTTTGACCCAGCAGGAGGGGGCGATCCCATCCTCTACCAACAC  
TTG-----  
-----  
-----

-----TTCTTAGAGAGAAACCTTCAACCGACTAACTGCCTTGG  
CATGCTGTTGCTGTCTGACGCCACCAGTGCACCAAGCTGTCAGAGCTTT  
CTTGGGCATGTGCCCTCAGCAACTTCCCCTATTTGCAAGACAGAGGAC  
TTCTCCAACCTGCCCAAAGACATGGTGGTGCAGCTTTTGTACATGAGGA  
GCTGGAGACAGAAGATGAGAGACTGGTTTATGACGCAGCCCTGAACGGGA  
TCAACTATGACCTGGAAAGGAGGCACGTGTACCTTCCAGAGCTCCTGAGA  
ACGGTCCGTCTTGGCCCTGCTGCCCGCCATCTTTCTAATGGAGAATGTCTC  
AACAGAAGAGCTTATCAATGCCCAGGCCAAGAGCAAGGAGTTGGTGGATG  
AGGCTATCCGCTGTAAGCTGAAGATCCTGCAGAATGACGGCGTCGTTAAC  
AGTCCATGTGCTCGGCCAAGAAAAACAGCCATGCTCTCTTTCTCCTGGG  
AGGGCAGACTTTTCATGTGCGACAAGTTGTACCTGGTGGACCAGAAGGCCA  
AAGAGATCATCCCAAAGCGGACATTTCCAGTCCCAGGAAGGAGTTCAGC  
GCCTGTGCCATTGGCTGTAAGGTGTACATCACAGGTGGGA--GAGGCTC-  
AGAGAATGGCGTGTCCAAGACGTATGGGTCTATGACACCGTCCATGAGG  
AATGGTCCAAGCGGCGCCCATGCTCATCGCCAGGTTTGGTTCATGGCTCT  
GCTGAGCTGAAACACTGCCTGTATGTGGTAGGAGGTCACACTGCGGCAAC  
TGGCTGCCCTCCCCGTTCCTCCATCCAGATGAATACGTTGTTGTTTCAGT  
CGTTCAACGACAAGGCTGATACTGAACGAAGCCGAGCTAATCATGGCTCT  
GGCCCAGGAGTTCCAGATGAGAGTGGTCACAGTTTCCCTAGAGGAACAGT  
CTTCTCAGCATGTCAGGTGATCAGCGGTGCTTCCATGTTAGTCAGC  
ATGCATGGAGCTCAGCTTATCGCCTCACTTTCCTCCCCAGAGGAGCTAC  
TGTAAGTGCAGCTGTTCCCTTTGCTGTGAACCTCAGAACAGTACACCCCAT  
ATAAAACCTTGCCTCTCTTCCAGGCATGGACCTTCATTATGTTTCCCTGG  
AGGAACACTCAGGAGGAGAACACCGTCCACCCATCCAGACAGACCCCTGGGA  
ACAAGWGGCATTCACTCACTTGGAGAAGGAGGAGCAGGAGCGCATACTGT  
CCAGCAAAGACGTCCCAGGCACCTGTGCTGCCCAACCCAGAGTGGCTC  
TTCCGGATCTACCAGGACTTTGGTAGACATACCTTCCTTCTTGGAAAGT  
TCTCAA---GGAGGGAATGAAG---ACCAAGCAAGTTTGAAGAA---GT  
CCAAACAGCCAGTACAGTCCATCCGGGCCGGGTCCAGAGAAGCCAGTGT  
CAGACCTCAGTACAAACCACCAACGAGGCTAAACTCACAGTCTCCTGGCA  
GATCCCCTGGAATCTGAAATACCTGAAAGTAAGAGAGGTGAAGTATGAGG

TGTGGATCCAGAAAAGAGACACCAGCAAGGGAACCTCTGGAGGATCAAATC  
ATCCAGGCAAACCCAGCGCTGGAGGCCTTTGGAAATGCCAAAACGTTGAG  
AAACGACAACCTCATCTCGGTTTTGGAAAATTCATCCGAATTCACCTTGGAA  
CTAGCGGCAAGCTCTCGTCCGCTGATATCGAGACATACCTGCTGGAGAAG  
TCTCGTGTACCTATCAGCTAAAGGCTGAGAGGGACTACCACATCTTCTA  
CCAGATCCTGTCCAATCAGAAGCCAGAGCTGCTGGACTTGCTGTTAATCA  
CTAACAAACCCATACGACTACTCGTACATCTCCCAAGGAGAGGTGACAGTC  
GCCTCCATCAATGACTCGGAGGAGCTGATGGCCACTGACAGCGCCTTCGA  
TGTGCTCGGATTCACTAATGAGGAGAAGATGGGCGTCTATAAACTGACCG  
GTGCCATCATGCACTATGGCAACATGAAGTTCAAGCAGAAGCAGCGGGAG  
GAGCAGGCCGAGTCTGATGGGACGGAGGCTGCTGATAAATCAGCTTACCT  
GATGGGGCTGAACTCTGCTGACCTCATCAAAGGGCTGTGCCATCCCAGAG  
TCAAGGTAGGAAATGAGTACGTCACCAAAGGCCAGAATGTGGACCAAGTC  
TACTATCCCAACAAGGAGGCCTTCAAGTGTGAGGAGTGTGGGAAGCACTA  
TAACACCAAGCTGGGATATAAGCGCCATGTGGCCATGCACTCTGCCACAG  
CGGGGGATCTCACCTGTAAAGTGTGCATGCAGAGCTACGAGAGCACACCT  
GTTCTTCTGGAGCACCTTAAAGACCCTCGGGGAAGTCCTCTGGCGGAGC  
CAAGGAGAAAAAGCACCCATGCGATCACTGCGACCGCCGTTTTCTACACGC  
GGAAGGATGTGAGACGGCACATGGTGGTCCACACGGGCCGAAAGGACTTC  
CTGTGCCAATACTGTGCCAGCGCTTTGGCAGGAAGGACCACCTGACCCG  
CCACGTGAAGAAGAGCCACTCGCAGGAGCTGCTGAAGATCAAGACGGAGC  
CTCCTGATATGCTAGGTCTTTTAGCTTCGGGGTCACCACCTTGCTCTGTG  
AAGGAGGAGCTTAGCCCCATGATGTGCGGCATGGGTCCCAATAAAGACCC  
CATGATGGGCAAACCATTTCCAGTGGCGCCCTTTTCCGATGGGCATGT  
ACAACCCACCAC-----CTTCAGGCCATGTCTAATTCTGGGGTGGGT  
CATCCA-----CACCCGTCCCTGATGCCAGCTCCCTGTCTTCAGCTAT  
GGGCATGGGCTGTCACATGGAANNNNNNNNNNNNNNNNNNNNNNNNNNNNNNNNTTACAGATCAGT  
GATGGATCAAACATT  
GTGAATCTTCTGGCTAGTAACTCTCCGAGTGTTCGTATGCTGTGACCCA  
GCAGAAATACTTACGTAACCTACAGTCCCGTATTGGTTTTTACATTTACG  
AGCCCATCGAGTACTGGAACCTCACGGTGCAGGAGCACCTGAAGACTCTG  
AGTCACGGCTTCAACAAGATCTCCTGGATGGACAACCTTCTTCCACTATCT  
GCGGGTGGTGAATGTGAGCGCCTCGACCAAGAGCGACTTCATCACCATCC  
TCAAGGGCTCCTTCTGCGTAGCCAGAGTACCAGCACTTCACTGAGGAC  
ATCATATTCTCCAAGA---ACCGTGAGACTG-----ATGAATACGACAT  
TATTGCCTCACGCATGTATCTGGTGGCTCGGACCACAGAGAAGAAGCGAG  
AGGAGGTGGTAGAGCTTCTGGAGAAGCTTCGCCCCGTTGATGCTGATCAAC  
AGCATCAAGTTCATTGCCTTCAATCCCACATTTGTGTTTCATGGACCGCTA  
CAGCTCCTCCGTATCTCGCCCATCTGACCTCAGGCTTCAGCGTGCTCA  
CCATCCTCATCCTCACTTCTTCTTCTGGTTCATCAACCCCTTGAAAACTTT  
TGGCTCATCCTCACGTTACGTCTGTGGAGCTGGTCTGCTTGGGGTTGAT  
GNNNNNNNNNNNNNNNNNNNNNNNNNNNNNNNNNNNNNNNNNNNGTGTCTGCCTCTTGCAATGTTGGCATTATT  
AATGGGCTCTCTGGATGGC  
CTTCTCGGTGGATGACTCCCCAGCTGACACCATCACTCGGCGGTTCGCG  
TATGATGTGGCACTAGTGTGAGCGTTAAAGGATCTGGAGGAGGACATCAT  
GGAAGGGCTGAGAGATAGTGGGATGGAAGACAGTGCTTGCACATCAGGCT  
TCAGTGTATGATCAAGGAATCTTGTGATGGCATGGGCGATGTCAGCGAA  
AAGCACGGTGGAGGACCAGTTATTCTGAGAAGGTGTACGTTTCTCTAT  
CACTATTATGTCTGTCTGTCCAGGCAGATGATGAGGAG-----  
-----GARGCGTTACTATCTTCACAGAACCAAAG  
CCAACTCAGAACTGTCCTGTAAGCCCCTTTGCCTGATGTTTGTGGATGA  
ATCAGACCATGAGACACTCACAGCTCTCCTGGGGCCTGTAGTTGCAGAGC  
GTAATGCAATGAAAGAGAGCAGGCTCATCCTTTCCATCGGCGGCCTGCCT

CGCTCCTTCCGCTTCCACTTCAGAGGCACAGGATATGATGAGAAGATGGT  
GCGAGAGATGGAGGGCCTGGAGGCCTCAGGGTCCAGCTATGTCTGCACTC  
TGTGTGATTCCAGTCGGGCAGAGGCATCTCAAAACATGGTGCTACTCA  
ATCACCCGCAGCCACGAAGACAACCTTGAACGTTACGAAATATGGAGAAC  
AAACCCCTTTTCTGAGACTGGAGAAGCGCTGCGGAGCAGAGTCAAAGGG  
TCTCTGCCAAGCCCTTCATGGAGACCATTGCACACTGGATGCATTACAT  
TGTGACATTGGCAATGCCATTGAATTCTACAAAATCTTCCAGGACGAAAT  
TGGAGAGCTGTACCAAAAGGT---GAAT---CCCAGCCGGGAGGAACGAC  
GCAGCTGGAGGGCAGCCCTAGATAAACAGCTGAGGAAGAAGTTGAAGCTT  
AAACCGTAATGAGGATGAATGGGAACATGCACGCAGGCTAATGACCCA  
GGAGACTGTGGAGGTGGTGTGTGAGCTGGTGCCCTCAGAGGAGAGGGG  
AGGCCCTGAGGGAGCTTATGAGGCTATACCTCCAGATGAAGCCTGTGTGG  
CGTGCCACCTGCCAGCCAAGGAGTGCCCTGACCAGCTGTGCCGCTATAG  
CTTTAACTCCCAGAGCTTTGCTGACCTCCTCTCCTCTACCTTCAAATATA  
GGTACAATGGAAAGATAACCAATTACCTGCACAAGACCCTGGCCCATGTC  
CCTGAAATCATAGAGAGAGAGNNNNNNNNNNNNNNNNNNNNNNNNNNNNNNNNNT  
CATAACCATCGACATGTGTCCCTGGG  
ACCCAGTGGAAGGAGAGCCACAGCCTTTCTCCTGCTCCGTCGAAGACC  
CCACAAAACAGACAAAGTTCAAAGGCATCAAGACGTACATTTTCGTACCGG  
GTCACGCCGAGCCACACCGGGCATCCCGTCTACAGGCGCTACAAACACTT  
TGACTGGCTGTACAACCGCTACTGCACAAGTTCACTGTGATCTCCGTGC  
CTCACCTGCCTGAGAAGCAGGCCACGGGAGATTTGAGGAAGACTTTATA  
GAGAAGCGAAAGARGCGACTGATACTGTGGATGAACCACATGACCAGTCA  
CCCTGTCTCTCCAGTATGAAGGCTTTGAGCACTTCTGTATGTGTGCCG  
ACGACAAGCAATGGAAGCTGGGCAAGAGACGAGCTGAGAAGGACGAGATG  
GTGGGCGCCATTTTCATGCTGACCCTCCAGATCCCTAACGAGCACCAAGA  
CCTTCAGGATGTTGAGGAGAGAATCGACACCTTCAAGGCCTTTGCTAAGA  
AAATGAGCAGACAGCGTCATGCAGCTCACACATGTTGCCTCGGAGCTCGTG  
CGTAAGCACCTGGGTGGATTCCGGAAGGAGTTCAGCGGCTGGGATATGC  
CTTCCAGTCTATTAGTCAGGCATTCATGCTGGACCCTCCCATAGCTCAG  
AAACTCTCAACAACGCCATCTCCCATNNNNNNNNNNNNNNNNNNNNNNNGACCTCTCTGGGTTTTATCAT  
TGG  
AGTCGGTGTGGTTGAAACCTCCTGATCTCCATCCTGCTGGTCAAAGACA  
AGAGCCTGCACCGAGCGCCCTACTACTTCCCTGCTGGACCTGTGCGCCTCA  
GACATCCTTCGCTCCGCCATCTGCTTCCCCTTCGTCTTCACCTCGGTCAA  
GAATGGATCTGCCTGGACCTATGGCAGCTGACCTGCAAAGTGATCGCCT  
TCCTGGGTGTGCTCTCTGTTTTCCACACGGCGTTCATGCTATTCTGCGTG  
AGCGTCACCCGCTACCTGGCCATCGCGCATCACCGTTTCTACACCAAGAG  
GCTGACCTTCTGGACCTGTCTGGCTGTCATCTGCATGGTGTGGACGTTGT  
CGGTGGCTATGGCGTTCGCGCCGGTGTAGACGTAGGGACGTACTCTTTT  
ATCCGGGAGGAGGACCAGTGCACATTCAGCACCGCTCCTTCAGGGCGAA  
TGATTCGCTGGGCTTCATGCTCCTGCTGGCGCTCATTCTCCTGGCCACAC  
AGCTGGTTTACCTCAAGCTCATCTTCTTTGTCCACGACCGTCGAAAGATG  
AAGCCTGTCCAGTTCGTGCCTGCTGTCAGCCAGAAGTGGACCTTCCACGG  
GCCAGGCGCCAGCGGGCAGGCGGCGGCAACTGGCTGGCTGGATTTGGTA  
GAGGCCCCACCCCGCCTACTTTGCTGGGCATCCGGCAGAACAGCAACGCA  
GCGGGCCGCAGGCGTCTACTGGTATTTGGATGAATTCAAAACAGAGAAGAG  
GATTAGTAGGATGTTCTACATCATGACATTTTTCTTCTCCTGGCACTGTGGG  
GGCCCTATCTGGTAGCCTGTTACTGGCGGGTGTGTGCAAGGGGCCCTGTA  
GTCCCTGGGGGCTACCTGACGGCAGCCGTGTGGATGAGCTTTGCCAGGC  
TGGGGTCAATCCTTTCATCTGNNNNNNNNNNNNNNNNNNNNNNNNNNNNNTCACCTGGCGTGGGG  
ACTGGTCCTGGCA  
CGGAGC---GCAGCGTCCCACTCGGCAACAGCTTGCTGTCCCGCAGCAA



-----  
-----  
-----  
-----  
-----  
-----  
-----  
-----  
-----  
-----  
-----  
-----

-----CGATGATTATATTGTGGTTTTTAGTCGTGCGTCT  
AACAGACTCATACTCAATGAAGCCGAGTTGATTCTAGCTTTGGCTCAGGA  
GTTCAAGATGAGGACAGTCACTGTGTCCTTAGACGAGCAGCCATTCGATA  
GCATAGTCCGGGTCATCAGTGGGGCATCCATGTTGGTCAGCATGCACGGA  
GCCCAGCTGATCACCTCCATGTTTCTTCCGCGAGGAGCTGCTGTGATCGA  
ACTCTTCCCGTATGCAGTCAACCCARAACAGTACACTCCGTACAAAACCC  
TGGCCTCTTTACCAGGCATGGATCTCCAGTATATATCATGGAGAAACAAC  
ATTGAGGAGAATTCCGTGACCTATCCTGACCGCCCTTGGGATCAGGGAGG  
CATCACACACTTGGAGAAAGAGGAGCAGGAGCGTATCCTCACTAGCAAGG  
AGGTACAAAGGCACCTCTGCTGCCGCAACCCTGAGTGGCTTTTCCGGATT  
TATCAAGACACCATTGTGGACGTTCCGTCTTTTTTGAAGTCCTTAA---  
AGAAGTCTAAAA---GTTAAGCCTAATCTGAAAA---GTCTAAGCCTG  
CCAGCACAGTACATCCCGGTCGAGTCCGAGAACCCAAGTGTGACATCG  
GTTCAAGCTNNNNNNNNNNNNNNNNNNNNNNNNNNNNNNNNNNNNNNNNNNNN  
NNNNNNNNNNNNNNNNNNNNNNNNNNNNNNNNNAAGAAGGACGCAACAAGGGCACCCTGGAGGATCAAAT  
CAT

CCAGGCAAATCCTGCACCTTGGAGCCTTTGGCAACGCCAAAACAGTAAGAA  
ATGACAACCTCCTCTCGTTTTTGGAAAGTTTATCCGCATTCATTTTGAACA  
AGTGGCAAACCTTCTTCAGCTGACATCGAAACATATCTGCTGGAAAAGTC  
CCGAGTTACCTTTCAGCTAAAATCAGAAAGAACTACCACATCTTCTTTC  
AGATCTTATCCAATGCCAAGCCAGAGCTGCTGGATATGCTTCTGATTACA  
AACAATCCCTACGATTACTCTTACATCTCCCAAGGAGAAGTAACTGTTGC  
AAGTATCAATGACAGCGAGGAGTTGTTAGCCACTGACAGTGCCTTTGATG  
TGCTTGGTTTTACCCAGATGAGAAGATAGGAGTGTACAAATTGACTGGT  
GCCATCATGCATTATGGGAACATGAAGTTCAAGCAAAGCAGCGTGAGGA  
ACAGGCTGAACCTGATGGTAGCGAAGCTGCTGATAAATCTGCCTACCTAA  
TGGGGCTAAACAGTGCAGATCTCCTGAAGGGACTCTGCCATCCGAGGGTC  
AAGGTAGGAAATGAATATGTACAAAAGGTCAAGGTGTGGATCAAGTATA  
CTACCCCAACAAAGAGGCCCTTCAAGTGTGAGGAGTGTGGCAAGCACTATA  
ACACAAAGTTAGGTTATAAGCGCCACGTGGCCATGCACTCTGCCACAGCG  
GGCGACCTGACCTGCAAGTTTTGTCTTCAGAGCTACGAGAGCACTCCTGC  
CCTCCTGGAACACCTCAAGAGCCACTCTGGCAAATCTTCGGGCGGCACCA  
AGGAGAAGAAACACCCTTGCACCCTGCGACCGCGCTTCTACACCCGC  
AAGGATGTTCCGGGCACATGGTAGTCCACACAGGCCGCAAAGATTTCTT  
GTGCCAGTACTGTGCCAGCGCTTTGGAAGGAAGGACCACCTCACGCGGC  
ACGTTAAGAAGAGCCACTCTCAAGAGCTGCTTAAGATCAAGACAGAACCT  
CCGGATATGTTGGGCTTGCTCGGGACTGGTTCTCCACCTTGTGCCGTGAA  
GGAAGAGCTCAGTCTATAATGTGTGGTATGGGCCGAACAAGGACTCAA  
TGATGACCAAGCCTTCCGCGAGTGGCACCCCTTTCCCAATGGGCATGTAC  
ACTCCTCACCAC-----CTCCCGCCATGTCCAACCAGGGATGGGTCA  
C-----CACCCGTCTTTGGTTCCTGGATCATTTGTCTGCTGCTATGG  
GTATGGGATGCCCCATGGAGTACTTGATTTACGCTCTTTTTCTTTTATG  
GGATGTTTACAAATCAGCGATGGCTACAATATAGTAAACCTATTAGCCAG



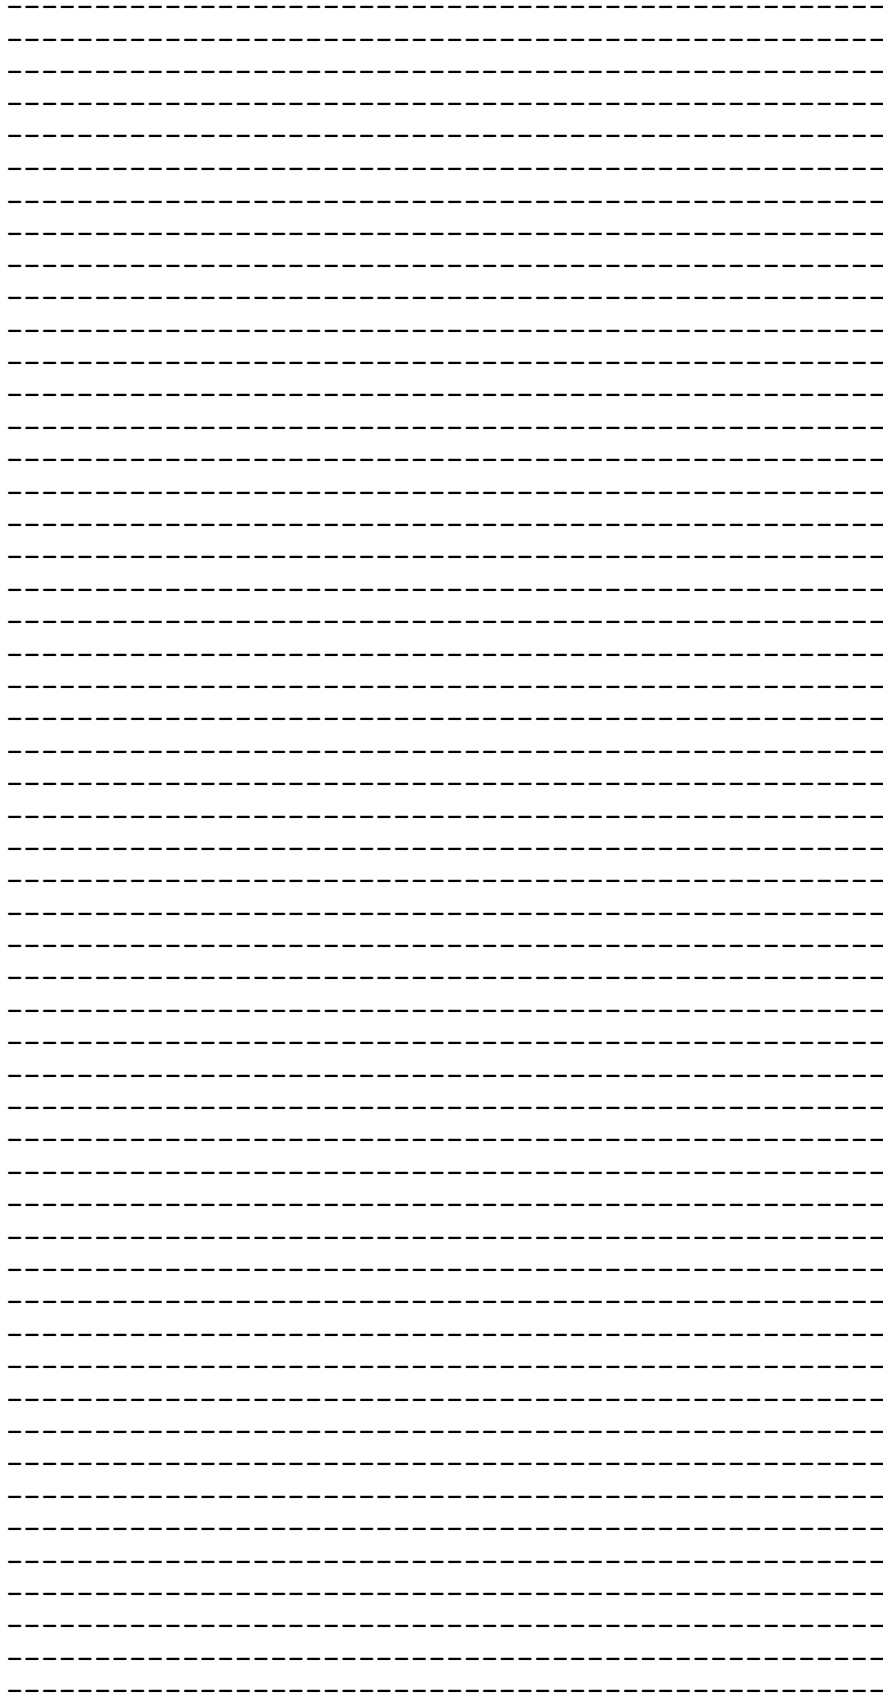



-----  
-----  
>Ateleopus japonicus

AGCTTACTAATTTCGAGCTGAATTAACCAACCCGGTCTTCTGGGAGA  
CGACCAGATTTATAATGTAATTGTTACAGCACATGCCTTTGTAATAATCT  
TCTTTATAGTCATACCTATCATAAATGGAGGTTTCGGCAACTGACTAATC  
CCACTAATGATTGGTGCTCCTGACATAGCATTTCGCCGAATAAACACAT  
AAGTTTCTGACTTCTACCCCTTCATTTCTGCTACTATTAGCTTCTTCTG  
GGGTTGAAGCAGGGGCTGGAACAGGCTGAACTGTTTACCCCTTTAGCC  
GGTAACTTAGCCCATGCTGGTGCCCTGTAGATTTAACAATCTTCTCACT  
ACACTTAGCAGGGTCTCCTCTATCTTGGGTGCCATTAATTTTACTACTA  
CTATTATTAATAAAAACCCAGCCGTCTCACAATATCAAACCTCCTTTA  
TTTGTCTGATCTGTAATTATTACAGCTGTACTACTTCTTCTCTCTCCC  
TGTGCTTGCTGCTGGTATTACAATATTACTCACAGACCGAAATTTAAATA  
CGACATTTCTTGACCCTGCAGGAGGAGACCCAATCTTATAACCAACAC  
TTATTTCTGGTTCTTCGGTCAACCCGAAGTTTATATTCTTATTCTCCCTGG  
GTTTCGGCATGATCTCACACATTGTAGCCTACTACTCCGGCAAAAAAGAAC  
CTTTTCGGATATATGGGCATGGTCTGAGCTATAATAGCCATCGGCCTCCTT  
GGGTTTATCGTATGGGCTCACCATATGTTTACAGTAGGGATGGACGTAGA  
CACACGAGNNNNTTCCCTAGAAAGGAACCTGCACCCATCCAACCTGCCTGGGCATG  
CTGCTGTTGTCAGACGCTCACCAAGCTGTCAGAGCTGTCCCTG  
GGGCATGTGCCTCAGCAACTTCCCTGCCATCTGCAAGACGGAGGAATTCC  
TCCAACCTGCCCAAAGACATGGTGGTGCAACTATTGTGCGACGAGGAGCTA  
GAGACCGAAGATGAGAGACTAGTGTACGAGACTGCCCTTAACTGGATCAA  
CTACGACCTTGATAGGAGACTGCCATCTGCCAGAGCTGCTGAGAACGG  
TTCGGCTGGCCCTGCTTCCTGCCATCTTCCTCATGAAAATGTCTCCACG  
GAAGAGCTGATCAACGCCAGGCCAAGAGCAAGGAACCTGTGCGACGAAGC  
CATCCGCTGCAAGCTGAAGATTCTGCAGAACGACGGCGTGGTAAACAGTC  
CCTGTGCCCCGGCCAGGAAGACCAGCCATGCCCTCTTCCTTCTGGGAGGG  
CAGACTTTTCATGTGCGATAAGCTTTACTTGGTGGACCAGAAGGCCAAAGA  
GATCATCCCCAAGGCTGACATCCCCAGCCGAGGAAGGAGTTCAGTGCCT  
GCGCCATCGGCTGTAAGGTCTATGTACAGGTGGGA--GGGCTC-AGAG  
AACGGCGTTTCCAAAGATGTTTGGGTCTATGACACCGTTCACGAGGAGTG  
GTCTAAGGCAGCCCCATGCTGATTGCCAGGTTTCGGCCATGGCTCTGCCG  
AACTGAAACACTGCCTCTACGTGGTGGGAGGACACACGGCAGCCACTGGC  
TGCCCTCCAGCCTCCCCCTCTGGACGAGTACATAGTGGTGTTCAGTCGCT  
CCTCTACGAGGCTGATTCTGAACGAGCCAGAGCTAATCATGGTGTGGCG  
CAGGAGTTTCAGATGAGGGTGGTCACGGTGTCTCTGGAAGAGCAATCCTT  
CCCCAGCATCATCCAGGCATCAGCGGCGCCTCCATGCTGGTCAGTATGC  
ACGGAGCTCAGCTTGTACCTCCCTCTTCCTCCCCAGAGGGGCTGCCATT  
GTGGAGCTTTCCCTATGCTGTGAACCCAGAGCAGTATACTCCATACAA  
AACCTTGGCGTCCCTCCCAGGCATGGATCTTCAATACGTTTCCCTGGAGAA  
ACACAATCGAAGAGAACTCRGTTAGCCACCCGATAGGTCCTGGGACCAA  
GGAGGCATTGCTCACCTGGACAAGGAAGAGCAGGAGAGAATTCTCGCCAG  
CAAGGAGTCCCAGGCACCTGTGCTGCCGCAACCCCGAGTGGCTCTTCC  
GAATCTACCAGGACACTCTGGTGGACATCCCCTCATTCCTCAAGACCCTC  
AA---GGAGGGCCTAAAG---ACCAGGCCAGCTTGAAGAA---GTCCAA  
GTCGGCCAACACKGTTACCCGGGTCGGGTACAGGGAAGCCAGTGCAGAA  
CCTCGGTCCAGGACACCAACGAGGCTAAACTCACTGTCTCCTGGCAGATC  
CCGTGGAATCTCAAGTACCTGAAGGTACGAGAGGTTAAGTACGAGGTCTG  
GATCCAGAAGAAAGATTCAAGCAAAGGTACACTGGAGGATCAAATCATTC  
AGGCAAACCCTGCACTGGAGGCTTTTGGTAATGCCAAAACAGTGAGGAAC  
GATAACTCATCCCGCTTTGGGAAATTCATCCGAATTCACCTTTGGAACCAG

TGGCAAATTGTCTCTGCCGACATTGAGACTTATCTCCTGGAGAAGTCAC  
GTGTCACCTTTTCAAGCTCAAGGCTGAGAGGAACTATCACATCTTCTCCAG  
ATCCTGTCCAATCAAAAGCCAGAGCTGTTGGACATGATGTTGGTCACCAA  
CAACCCATATGACTACTCCTTCATCTCCCAAGGAGAGGTAACAGTAGCAT  
CCATCAATGATGCAGAGGAGCTGATTGCCACTGACAGTGCCTTTGATGTC  
CTCGGCTTACCCAGGAGGAGAAGCTGGGAGTTTACAAGTTGACAGGTGC  
GATCATGCACTATGGCAACATGAAGTTCAAGCAAAAGCAGCGTGAAGAGC  
AGGCTGAGTCTGATGGCACAGAGGCTGCTGATAAGTCAGCTTATCTAATG  
GGGCTGAATTCTGCCGACCTCATTAAGGGCTTTGCCATCCCAGAGTCAA  
AGTAGGAAATGAGTACGTACCAAAGGCCAAGGTGTAGATCAGGCTACT  
ACCCCAACAAGGAGGCCCTTCAAGTGTGAGGAGTGTGGTAAGCACTATAAC  
ACCAAGCTGGGATACAAGCGCCATGTGGCCATGCACTCGGCCACGGCGGG  
CGACCTCACCTGTAAAGTGTGTATGCAGAGCTACGAGAGCACGCCGGTCC  
TCCTGGAACACCTCAAGAGCCACTCTGGGAAATCTTCTGGTGGAGCCAAG  
GAGAAAAAGCACCCATGTGATCACTGTGACCGTTCGGTTCTACACCCGGAA  
GGACGTGAGGCGGCACATGGTAGTCCACACGGGCCGAAAGGACTTCCTGT  
GTCAATACTGCGCCAGCGCTTTGGCCGGAAGGATCACCTGACGCGACAC  
GTGAAGAAGAGCCACTCGCAGGAGTTGCTGAAGATAAAGTCAGAGCCTCC  
GGATATGCTGGGCCTCCTGGGCTCCGGCTCGCCGCTTGTGCAGTTAAGG  
AGGAGCTTAGCCCCATGATGTGCAGCGTTGGTCCCAACAAAGACCCCATG  
ATGGGGAAACCCTTCCCAGCGGGACCCCTTTCCCTATGGGTATGTATAA  
CCCGCACCAC-----CTCCAGGCCATATCCAGCCAGGGGTGGGCCACC  
CC-----CACCCCTCCCTGATGCCTAGTTCCCTGTCAGCGGCTATGGGC  
ATGGGCTGTCAATATGGAATATCTCATTTACGCTTCCTTCTCCTTCATGGG  
ATGTTTACAAATCACTGATGGGTGCAACATAGTGAATTTATTAGCTAGTA  
ATTCTCTGAGCGTCTCATATGCTCTGACCCAGCAAAAGTATTTTCAAGTAAC  
TATAGTCCCCTCATTTGGGTTTTACATCTACGAGCCTATTGAGTACTGGAA  
CTCAACAGTGCAGGAGCACCTGAGGACACTGAGCGATGGTTTTCAACAAGA  
TCTCTTGATGGACCACCTTCTCCACTACCTGCAGGTGGTGAATGTGAGC  
GCGTCAACCAAGAATGACTTCATCGGCATCCTGAAAGGCTCCTTCTTGAG  
GAACCCGGAGTACCAGCACTTCATGGAGGACATCATCTTCTCCAAGA---  
ACCGGGAGAGCG-----ATGAGTACGACATCATCGCCTCACGCATGTAC  
CTGGTGGCGCGCACCCACGGAGAAGAGGCGGAGGAGGTGGTTGAACCTCT  
GGAGAAGTTGCGACCGCTGATGCTCATAAACAGCATCAAGTTCAATTGCTT  
TCAACCCACCTTTGTCTTCATGGACCGCTACAGCTCCTCYGTCATCTCA  
CCCATCCTCACCTCTGGCTTCAGCGTCCACCATCCTCATCCTCACTTT  
CTTCTGGTCATAAACCCGTTGGGGAACTTTTGGCTCATCCTGACGGTCA  
CATCTGTGGAGCTGGGAGTTTTGGGTTTAAATGGGTTTTACCAGTTTGGAG  
TGGCAGCCTGCCCTCCAGAATGTGTCTCATCTGCCACGTGGGCATCAT  
CAACGGACTCTCCGGCTGGGCCACCTCTGTAGATGACTCACCAGCCGACA  
CGATCTCCCGGCGGTATCGCTACGATGTGGCCCTGGCATCTGCCCTTAAG  
GACCTGGAGGAAGACATCGTGGAGGACTGGTAGAACACGGACTGCAGGA  
CAGCGTTCTGACCTCGGAGTTCAGCGTTGTGATCAAGGAGTCTGCGACG  
GCATGGGTGACGTTAGCGAGAAGCACGGAGGAGGGCCGGCGATTTCCCGAG  
AAGGCGGTCCGCTTCTCCTTACCCTTATGTGAGTCTCTGTCCGGGTCTCA  
AGGAACGGAA-----GAGGCGGTCA  
CCGCTTTCAGGGAGCCGAAGCCCAACTCTGAATTGTCCTGTAAACCCCTC  
TGTCTGATGTTTGTGGATGAGTCTGACCACGAGACCCTGACAGCCATTCT  
GGGGCTCTGGTGGCCGAGCGGAATGCGATGAAGCAGAGCCGCTGATCC  
TGTCATTTGGGCGGCTCCCGCGCTCTTCTCCTTCGAGTTCCGAGGCACG  
GGCTACGACGAGAAGATGGTGGCAGAGTTGGAGGGCATGGAGGCTCTGG  
TTCCACCTACGTCTGCACCCTGTGCGACTCCACCCGGGCGGAGGCTCTC  
GAAACATGGTGTCTCCACTCCATCACCCGGAGCCACGGCGAGAACCCTGGAG





AGTCCCTGTGCCCCGCCAGAAAGACCAGCCATGCCCTCTTCCTGCTGGG  
AGGACAGACCTTCATGTGTGATAAGCTGTACTTGGTGGACCAGAAGGCCA  
AAGAGATCATCCCCAAGGCTGACATCCCCAGCCCCAGGAAGGAGTTCAGT  
GCCTGTGCCATCGGCTGTAAGGTCTACGTACAGGTGGGA--GGGGCTC-  
AGAGAACGGTGTCTCTAAAGACGTCTGGGTCTATGATACCGTCCATGAGG  
AGTGGTCCAAGGCAGCACCCATGCTCATTGCTAGGTTTGGCCATGGCTCT  
GCTGAGCTCAAACACTGCCTCTATGTGGTGGGAGGACACACAGCAGCCAC  
TGGCTGCCTCCCAGCCTCTCCGTCTGGATGAGTACATTGTTGTGTTTCAGT  
CGTTCAACAACAAGGCTGATTCTGAACGAAGCGGAGCTGATACTGGCACT  
GGCCAAGAGTTTCAGATGAGGGTGGTTACAGTGTCCCTGGAGGAACAGT  
CTTTCCCCAGCATCGTACAGGCCATCAGTGGGGCTCCATGTTGGTTAGT  
ATGCATGGAGCTCAGCTCGTACCTCACTCTTCCCTCCCAGAGGAGCTGC  
TGTAGTAGAGCTCTTCCCCTATGCTGTGAATCCGGAACAGTACACCCCAT  
ACAAAACCCTAGCCTCCCTACCAGGCATGGACCTTCAATACGTTTCCTGG  
AGGAACACTATTGAGGAGAACACTGTCGCCCACCCAGACAGACCCCTGGGA  
CCAAGGAGGCATTGCCCATTTGGAGAAAAGAAGAGCAGGAGAGAATCCTAG  
CCAGCAAGGATGTCCCTAGGCACCTATGCTGCCGCAACCCAGAGTGGCTC  
TTCAGGATCTACCAGGACACTATGGTAGACATCCCCCTCCTTGCTGGAAGT  
CCTCAA--GGAGGGCCTGAAG---ACCAGGCCGAGCTTGAAGAA---GT  
CCAAGCCGGCCAGCACGGTTACCCGGGCCGGGTCCGAGAACCCAGTGC  
CAGACTTCAGTCCAAGCCACCAACGAGGCTAAACTCACAGTATCCTGGCA  
GATCCCATGGAACCTTAAGTACCTGAAGGTGCGAGAGGTCAAGTACGAGG  
TGTGGATCCGGAAGAGGGATGCAAGCAAGGGAACCCCTGGAGGATCAAATC  
ATTCAGGCAAACCCCTGCACTGGAGGCTTTTGGTAATGCTAAAACACTGAG  
GAATGACAACCTCCTCTCGCTTTGGGAAATTCATCCGAATTCACTTTGGAA  
CCAGTGGCAAGCTGTCTCTGCAGACATTGAGACTTACCTGCTGGAGAAA  
TCACGAGTCACCTTTCAGCTTAAGTCAGAGAGGAACTACCATATCTTCTT  
CCAGATTTTGTCCAATCAAAGCCAGAGCTGTTGGACATGTTGCTGATCA  
CCAACAACCCCTACGACTACTCCTACATCTCCAAGGAGAGGTAACGTGA  
GCATCCATCAATGATTCGGAGGAGTTGATGGCCACGACAGTGCATTTGA  
TGTGCTTGGCTTCACTCAAGAGGAGAAGATGGGCGTCTACAAGCTGACAG  
GGGCTATTATGCACTATGGCAACATGAAGTTCAAGCAAAGCAACGTGAG  
GAGCAGGCTGAGCCTGATGGTACAGAGGCTGCTGATAAGTCAGCTTACCT  
AATGGGGCTGAATTCAGCTGACCTCATCAAAGGACTCTGCCATCCCAGAG  
TCAAGGTAGGAAATGAATATGTCACCAAAGGCCAGGGTGTAGATCAAGTC  
TACTACCCCAACAAGGAGGCCTTCAAGTGTGATGAGTGTGGGAAGCACTA  
CAACACCAAGCTGGGATACAAGCGCCATGTGGCCATGCACTCCGCTACCG  
CCGGGGATTTAACCTGCAAGGTGTGCATGCAGAGTTACGAGAGCACGCCG  
GTTCTCTTGGAGCACCTCAAGAGCCACTCGGGGAAGTCTTCGGGTGGGGC  
CAAAGAGAAAAAGCACCCCTTGTGACCACTGCGACCCGACGTTTCTACACTC  
GGAAGGATGTGAGACGGCATATGGTGGTCCACACAGGCCGCAAGGACTTT  
CTCTGCCAGTACTGTGCCAGCGGTTTGGCAGGAAGGACCACCTGACACG  
GCATGTGAAGAAGAGCCACTCGCAGGAGCTCCTAAAGATCAAGACAGAGC  
CTCCAGATATGTTGGGCTTGCTAACGTCAGGGTCCCCGCCATGCCCTGTC  
AAGGAAGAACTCAGCCCCATGATGTGTGGCATGGCACCCAACAAGACCC  
CATGATGGGTAAATCCTTCCCCAGCGGGGCACCATTTCCCATGAGCATGT  
ACAACCCCAACCAT-----CTCCAGGCCATGTCCAATTCTGGGGTGGCT  
CACCCG-----CACCCCTCCCTGATGCCAGTTCCTGTCTGCAGCTAT  
GGGCATGGGCTGCCACATGGAA-----

-----  
-----  
-----  
-----





---

>Aulostomus maculatus

AGTCTTATCATCCGGGCCGAGCTTAGCCAACCGGGGGTCTCCTGGGTAA  
CGATCAACTTTACAATGTTGTTGTAACAGCCCACGCCTTCGTTATAATCT  
TCTTTATAGTAATAACCAATTATAATTGGAGGCTTCGGAAATTGATTAATT  
CCCTTAATGATCGGAGCCCCGACATGGCCTTCCCCGAATAAATAACAT  
GAGCTTCTGGCTCCTGCCCCCTCCTTCCTCCTCCTCTTAACCTCCTCTG  
CGGTAGAGGCCGGGTCCGGGACCGGATGGACGGTTACCCGCCCTGGCT  
GGGAACCTGGCCCACGCCGAGCGTCCGTAGACCTGACCATCTTCTCGCT  
TCACCTCGCCGGAATTTCCCTCCATCCTAGGAGCAATTAACCTTTATTACAA  
CCATTATTAATAAAAACCCCTGCCACCTCCCCATACCAGCTCCCCCTG  
TTCGTATGAGCTGTCTGGTTACTGCTGTGCTTCTCCTCCTTTCTCTCCC  
AGTCTTAGCAGCTGGCATTACAATGCTGTTAACTGACCGAAACCTGAACA  
CCACCTTCTTCGACCCTGCAGGGGGAGGCGATCCTATTCTATATCAGCAC

-----  
-----  
-----  
-----

-----TTCCCTGGAGAGAAAACCTCCACCTTCTAACTGCCTTGG  
CATGTTGTTGCTCTCTGATGCCACCAGTGTACCAAGTTGTCAGAGCTCT  
CCTGGGGCATGTGCCCTCAGCAACTTCCCCGCTATTTGCAAGACGGAGGAC  
TTCCCTTCAACTACCCAAAGATATGGTGGTGCAGCTGTTGTACACGAAGA  
GCTAGAAACCGAAGATGAAAGGTTAGTTTATGAGGCGGCCCTGAACTGGA  
TCAACTACGACCTAGATAGGAGGCACGTGTACCTCCCGGAGCTCCTCAGA  
ACCGTGCCTTAGCACTTCTGCCTGCCATCTTTCTAATGGAGAATGTCTC  
GACTGAAGAGCTGATCAACGCCAGGCCAAGAGCAAGGAGCTGGTGGATG  
AGGCTATCCGGTGCAAGCTGAAGATCCTTCAAAATGACGGTGTCTGTAAC  
AGCCAGTGTGCTCGACCAAGAAAACCCAGCCATGCCCTCTTTCTTCTGGG  
AGGACAGACTTTTTATGTGTGACAAGTTGTACCTGGTGGATCAGAAGGCCA  
AAGAGATCATACCAAAGGCTGACATTTCCAGCCCCAGGAAGGAATTCAGC  
GCCTGTGCCATCGGTTGTAAGGCTACATCACAGGAGGAA--GAGGCTC-  
AGAGAATGGTGTGTCCAAGATGTATGGGTCTATGACACCGTCCATGAAG  
AATGGTCCAAGCAGCACCCATGCTCATTGCCAGATTTGGTCATGGCTCT  
GCGGAGCTGAAACACTGCCTGTACGTGGTAGGAGGTCACACCGCAGCGAC  
TGGCTGCCCTCCAGCTTCTCCATCTGGACGAATACATCGTTGTGGTCAGC  
CGATCAACAACAAGGCTGATACTGAATGAAGCCGAGCTCATCATGGCGCT  
GGCCAGGAGTTCAGGATGAGGGTGGTCACGGTTTCCCTGGAGGAACAGT  
CTTTCCCAGCATCGCTCAGGTGGTCAGTGGTGCCTCCATGTTAGTCAGC  
ATGCATGGAGCTCAACTCATCACCTCGCTCTTCCCTCCCAGAGGGGCTGC  
TGTGGTGGAAATTGTTCCATTTGCTGTGAACCCAGAACAGTATACTCCAT  
ACAAAACCTTGGTCACCCTTCAAGGCATGGACCTTCACTATGTGTCTGG  
AGAAACACAAAGGAGGAGAACACTGTTACCCACCCAGACAGACCGTGGGA  
ACAAGGAGGCATTGTTACCTGGAGAAGGAGGAGCAGGAGCGAATACTGG  
CAAGCAAAGATGTCCCAGACACCTGTGCTGCCGCAACCCGGAGTGGCTC  
TTCAGAATCTACCAGGACACACTGGTAGATATCCCTTCCTTCCCTGGAAGT  
TCTGAG---AGAAGGCATGAAG---ACCAAGCCAGCTTGAAGAA---GG  
CCAAGCCAGCCAGCGTGGTCCATCCAGGCCGGGTCAGAGAACCTCAGTGT  
CAGACCTCAGTACAAACCACCAATGAGGCCAAACTCTCAGTTTCCCTGGCA  
GATCCCATGGAATCTGAAATACCTGAAAGTAAGAGAGGTGAAATATGAGG  
TGTGGATCCAGAAAAGGACACCAGTAAAGGGACTCTGGAGGATCAGATT  
ATCCAGGCGAATCCTGCGCTGGAGGCCTTTGGGAATGCCAAAACCTTGAG  
AAATGACAACCTCTCTGTTTTGGAAAATTTATCCGAATTCATTTTGGAA  
CAAGTGGGAAGCTGTCATCTGCTGACATCGAGACGTACCTGCTGGAAAAG



TCTCGTGTACCTTTCAGCTCAAGGCTGAAAGGAACTACCACATCTTCTA  
TCAGATCCTGTCCAATCAGAAGCCAGAGCTGCTGGACATGCTGCTAATCA  
CGAACAAACCCGTACNACTACTCCTATATCTCGCAAGGAGAGGTGACAGTAG  
CTTCCATTAATGACTCAAAGGAGCTGATGGCCACAGACAGTGCCTTCGAT  
GTGCTCGGCTTTACTTCAAAGGAGAAAATGGGTGTCTACAACTGACCGG  
CGCCATAATGACTATGGTAACATGAAGTTCAAGCAGAAGCAGCGTGAGG  
AGCAGGCTGAGCCTGACGGGACAGAGGCTGCTGATAAGTCAGCTTATTTG  
ATGGGGCTGAACTCTGCTGACCTCATCAAAGGGCTGTGTTCATCCCAAAGT  
TAAGGTAGGAAACGAGTACGTCACCAAAGGCCAGAGCGTGGACCAAGTCT  
ACTACCAAACAAGGAGGCCTTCAAGTGTGAGGAGTGCGGGAAGCACTAC  
AACACCAAGCTGGGATATAAACGCCATGTGGCCATGCACTCTGCCACAGC  
AGGAGATCTCACCTGTAAAGTGTGCATGCAGAGCTATGAGAGCACACCAG  
TTCTCCTGGAGCACCTCAAGAGCCACTCTGGGAAGTCCTCAGGCGGAGCT  
AAGGAGAAAAAACACCCATGTGACCCTGTGATCGCCGTTTCTATACACG  
GAAGGATGTGAGGCGGCACATGGTGGTCCACACAGGCCGTAAAGACTTCC  
TGTGCCAGTACTGTGCCAGCGCTTTGGCAGGAAGGACCACCTAACTCGC  
CATGTGAAGAAGAGCCACTCACAGGAGCTGCTGAAGATCAAGACGGAGCC  
TCCGGATATGTTGGGTCTGTTAGCTTCTGGGTACCTCCTTGCTCTGTGA  
AGGAGGAGCTCAGTCCCATGATGTGTGGCATGGGTCCCAACAAAAGACCCC  
ATGATGGGCAAACCGTTCCCCAGTGGGGCCCCTTTTCCAATGGGCATGTA  
CAACCCCCACCAT-----CTTCAGGCCATGTCTAATTCTGGGGTGGGT  
ATCCA-----CACCGTCCCTGATGCCAGTTCTCTGTCTGCAGCTATG  
GGCATGGGTTGTACATGGAANNNNNNNNNNNNNNNNNNCTTCTCATTCATGGGATGTTTACAAATCA  
GTGATGGTTCAAACATTTGTAACCTTCTGGCTAGTAACTCTCCAAGTGT  
TCATATGCTCTGACTCAGCAGAAATACTTCAGCAACTACAGCCCAGTAAT  
TGGTTTTTACATTTATGAGCCTATTGAGTACTGGAACCTCCACAGTGCAGG  
AGCACCTCAAGACTCTGAGTCATGGTTTTCAATAAGATCTCCTGGATGGAC  
AACTTTTTCCACTACCTGCGGGTGGTGAATGTCAGTGCATCCACCAAGGG  
TGACTTCATCACCATCCTCAAGGGCTCTTTCCTGCGGAGTCCTGAGTACC  
AGCACTTCACTGAGGACATCATATTTCTCCAAGA---ACCGCGAGACAG--  
----ACGAATATGACATTATCGCCTCACGCATGTATTTAGTGGCACGGAC  
CACAGAGAAGAAGCGTGAGGAGGTGGTGGAGCTTCTAGAGAAGCTTCGCC  
CTTTGATGCTGATCAACAGCATCAAGTTCATTGCCCTTCAATCCCACATTT  
GTGTTTCATGGACCGCTACAGCTCCTCTGTTCATATCGCCATACTGACCTC  
AGGCTTCAGTGTACTCACCATCCTTATACTCACTTTCTTCTTCTGGTCATCA  
ACCCCTTGGGGAATTTCTGGCTCATCCTCACAGTAACATCCGTGGAGCTG  
GGTGTCTGGGTTTGGTGGGTTTTACCAGTTTGAATGGCAGCCAGCTCT  
CAAGAATGTGTGAGCATCTTTCAATGTTGGCATTATTAATGGCCTCTCTG  
GATGGGATTCGTCCGTGGATGACTCACACCTGACACCATTACTCGGCCGA  
TTTCGCTATGATGTGGCTCTAGTATCAGCATTAAAGGATCTGGAAGAGGA  
CATAATGGAAGGGCTCAGAGAGAGGGGGATGGAAGACAGTGTTCACCT  
CAGGCTTCAGTGTATGATCAAAGAGTCTGTGATGGCATGGGCGATGTC  
AGCGAGAAGCATGGTGGAGGACCAGTTGTTTCTGAGAAAGCTGTTCGTTT  
CTCTTTCACAATTATGTCTATCTCTATCCTGGGTGATGATGATGAA----  
-----GATAAGGTTACTATATTTCACTGAG  
CCAAAGCCAAACTCAGAAGTGTCTGTAAGCCCCCTTTGTCTGATGTTTGT  
GGATGAATCTGATCATGAGACCCTCACAGCTGTACTGGGGCCTATTTTTA  
CGGAGCGTAATGCAATGAAGGAAAGTAGACTGATCCTCTCCATTGGTGGT  
CTGCCTCGCTCTTTCCGTTTTCCACTTTAGAGGCACGGGATATGATGAGAA  
GATGGTGCAGAGATGGAGGGCCTGGAGGCCTCAGGCTCCACCTATATCT  
GCACTCTGTGTGACTCAGGTCGGATGGAGGCCTCTAAAAACATGGTACTA  
CATGCCATCACACGCAGCCACGATGAAAACCTAGAACGTTATGAAGTATG  
GGAGGACCACCCCTTTTTTGGAGTCTGTAGATGAGCTACGGGACAGAGTCA

AAGGGGTCTCTGCCAAGCCATTTGCTGAGACCCATCCCACACTGGATGCA  
TTACATTGTGACATCGGCAATGCCACTGAATTCTACAAAATCTTTCAGGA  
TGAAATTGGGGAGGTGTACCAGAAGGT---CAAT---CCCTGCCGGGAGG  
AGCGACGCAGCTGGAGGGCAGCTCTAGATAAGGAGCTGAGGAGGAAGATG  
AAGCTTAAACCAGTAATGAGAATGAATGGCAACTATGCGCGGAAGCTAAT  
GACCTTGTAGGCTGTGGAGGTTGTGTGTGAGCTGGTGCCATCTGAGGAGA  
GGAGGGAGGCCTTGAGGGAGCTTATGAGGCTCTACCTTGAGATGAAGCCT  
GTATGGCGTGCCACCTGCCCAGCAAAGGAGTGCCCTGACCAGTTGCACCG  
CTACAGCTTCAACTCCCACCGTTTTTCTGACCTCCTCCTCCACCTTCA  
AATACAGGTACAATGGCAAGATAACCAATTACCTGCACAAGACTTTGGCC  
CATGTCCCTGAGATCATTGAGAGAGACGGATCTATTGGAGCCTGGGCTAG  
TGAGGGGAAGGAGTCAGCAAACAAAANNNNNNNNNNNNNNNNNNNNNNCTCTCGGGCCCCAGTGGAAAGGAG  
AG

CCCACAGCCTTTCTCCTGCTCCATTGAAGATCCCACAAAACAGACAAAAT  
TCAAAGGCATCAAGACATACATTTTCATACCGGGTCACGCCGTCTCACACG  
GGCCGTCCCCTGTACAGACGCTACAAACACTTCGACTGGCTGTACAACCG  
GCTGCTGCACAAGTTCACTGTGATCTCCGTGCCGCACCTGCCTGAGAAGC  
AGGCCACGGGGCGGTTTCGAGGAAGACTTTTATCGAGAAGCGTAAGAGACGA  
CTGATACTGTGGATGAATCACATGACCAGTCACCCAGTCCTCTCCCAGTA  
TGAAGGCTTTGAGCACTTTCTGATGTGTGCTGACGACAAGCAGTGGAAAGC  
TGGGCAAGAGACGGGCGGAGAANGANGAGATGGTGGGTGCCCACTTCATGCT  
GACCTTCCAGATCCCCAACGAGCACCAGGACCTTCAGGATGTAGAGGAGA  
GGGTGGACTCCTTTAAGGCCTTTGCCAAGAAAATGGACGACAGTGTTCATG  
CAGCTCACACATGTTGCCTCTGAGCTGGTGCCTAAACACCTGGGTGGGTT  
CAGGAAGGAATTCAGCGACTGGGAAATGCCTTCCAGTCCATCAGCCAGT  
CATTCATGCTGGACCCCCCCACAGTTCAGAGACCCTCAACAACGCCATC  
TCCCATNNNNNNNNNNNNNNNNNNNNNNACTGACCTCTCTGGGTTTTATTATTGGTGTGGTGTGGTGGGA  
ACCTCCTGATTTCTATCCTGCTGGTCAAAGACAAGAGCCTGCACCGAGCA  
CCCTACTATTTCTGCTGGACCTGTGCGCCTCTGATATCCTGCGCTCAGC  
CATCTGCTTCCCCTTTGTCTTCACCTCAGTCAAGAATGGCTCCGCCCTGGA  
CATACGGCACGTTAACCTGCAAAGTGATCGCCTTCCCTGGGTGTGCTGTCC  
TGTTTCCACACTGCATTCATGCTATTCTGTGTTAGTGTACACGCTACTT  
GGCCATTGCACATCACCGCTTCTATACTAAGAGGTTGACCTTCTGGACCT  
GTCTGGCTGTTCATCTGCATGGTGTGGACATTGTTCAGTCGCTATGGCATTC  
CCACCAGTGTAGACGTAGGGACGTATTCTTTTATCCAAGAGGAGGATCA  
GTGCACATTCAGCACCGCTCCTTCAGGGCAAATGATTCACTGGGCTTCA  
TGCTCCTGCTGGCTCTCATTCTCCTGGCCACACAGCTGGTTTTACCTCAAG  
CTCATCTTCTTCGTCCACGACCGCCGAAAGATGAAGCCCGTCCAGTTTGT  
GCCTGCTGTTCAGCCAGAACTGGACTTTCATGGTCCAGGTGCCAGCGGGC  
AGGCAGCAGCCAACCTGGCTAGCCGGATTTGGTTCAGAGGCCACCCACCT  
ACTTTGCTGGGAATCCGACAGAACAGCAATGCAGCGGGCCCGCTCGCCT  
ACTGGTATTGGATGAGTTCAAACAGAGAAGAGGATTAGTAGGATGTTCT  
ACATCATGACGTTTTCTTCTCCTGGCTCTGTGGGGGCCCTATCTGGTAGCC  
TGCTACTGGCGGGTGTGTTGCAAGGGGGCCCCGTGGTTCCTGCAGGCTACCT  
CACAGCAGCCGTGTGGATGAGTTTTGCCCAGGCTGGGGTCAATCCTTTCA  
TCTGCATNNNNNNNNNNNNNNNNNNNNNNNNNNNNNNNGGCGTGGGGACTGGTCTGGCACAGA  
GC---GCAGCGTACCAC  
TCGGCAACAGCTTGCTATCCCCGCAGCAAACCGAGGAGCCCACTGTTGCC  
ACCCCCCGCAGCGATGGTTTGTACCC---CTGCCAACAACCGACTGGA  
CTTTGCAGCCTCGGCATACGAGGCCGCT-----GATTTCCGCCGTA  
ACGCGGCCACCTTGTGTCTACGCAGCGGCCGGAGTGAAAGCTC-----  
-TTCCCCTGCCGACTGCAGGCTGTCCAACCGGCCCTTTGGCTATTACGC  
AGATCCGTACG---GTTGG---GGAGGACGCACGCCGCCGAGTACTGTG

CGGTCAATAGCAAATCAAGCTCGGTGTTTTCTGCTGGCCCGCAAACCTCT  
ATCGGCGGCAGAGCAGGCA---CC---AACTGCCTGG-----CGGA  
GGA---GGGA---GACTC---CATCCCGACAGAGAGGTCACCG---AT--  
-C---GGATCAGAGGAG---ACCAAATCTAAAGACATGAC---GTCAGA-  
--GTCGAGCTGGATAGAG---ACGCCGTCCTCCATTAAGTCCATCGATTC  
AAGCGACTCTGGGATCTTTG---AACAGGCCAAACGGAGGAGAATCTCCC  
CGTCTGCAACGCCG-----GTACCAGAGACAGTGTCCCCGTTAAAA  
TCCGAGATCACTCAACAGGGCGAAGTCACAGAGAGAGAAGCGGCGTTGGG  
GATAAATCCGTTTGCAGATGGGATGGGCGCCTTCAAATAAAACCACAGCT  
CCCACGATATTGGCTCCGG---ACAAACGGCGTTTTCTCCCAGGCG---  
CCCGGCTAC---GCAGCAGCCGCCCTGGGGCACCACCACCA-----CCA  
CCCGACCCACGTTGGCTCT---TACTCCACGGCGGCTTTTAACTCCACGA  
GGGACTTTCTCTTCAGAAATCGGGGTTTTCGGGGACGCCACCGG-----  
-----GGCGCAGCACAGTTTTGTTCCGCCTC-----CGGAAGTTT---  
C-----GCAGGGCCACATGGACACTCAGATGCAGCGGGGCACCTGCTCT  
TCCCCGGGGCTCCACGAG---CAGGCGGCGAGCCATGCGTCTTCCAACGTG  
GTCAACAGCCAGATGCGACTGGGCTTCTCGGGGGACATGTACGGAAGGGC  
CGACCAGTACGGCCACGTTACGAGCCCACGCT---CCGA---TTATGCCT  
CGACCCAGTTGCATGGCTACGGCCCCATGAACATGAATATGGCCGCG---  
CACCACGGAGCAGGGGCCCTTCTTTTCGATACATGAGGCAACCCATCAAACA  
AGAGCTTATCTGCAAGTGGGTGCAACCGGAGCAGCTGACGAATCCCAAAA  
AGTCATGCAACAAAACCTTTTAGTACAATGCACGAGCTGGTGACCCATCTG  
ACGGTGGAGCATGTGGGGGACCGGAGCAGACCAACCACATCTGCTTCTG  
GGAGGACTGCTCCAGAGAAGGGAAACCTTCCAAGCCAAATACAAACTTG  
TGAATCATATCCGAGTTCACACCGGAGAAAAGCCCTTTCGTTGCCCGTTC  
CCCGGCTGTGGCAA

>Aulotrachichthys prosthemi

AGCCTACTCATCCGAGCAGAGCTAAGCCAACCTGGGGCCCTCCTAGGTGA  
TGATCAAATTTATAACGTTATTGTTACAGCGCATGCCTTTGTAATAATTT  
TCTTTATAGTAATACCAATCATAATTGGTGGCTTCGAAACTGACTTATT  
CCCCAATGATCGGAGCCCTGATATAGCATTTCCTCGAATAAATAATAT  
AAGCTTCTGACTTCTCCCACCATCATTCCTCCTCCTCCTCGCTTCTTCCG  
GAGTTGAAGCAGGGGCGGACAGGATGAACAGTATACCCGCCCTTGCA  
GGAAACCTAGCTCACGCAGGAGCTCCGTAGATCTAACCATTTTCTCCCT  
ACATTTAGCAGGTGTTTCCCTCCATCCTGGGGGCCATCAATTTTATTACAA  
CCATTATTAATATGAAACCCCTGCTATTTCTCAGTACCAAACCCCTTA  
TTTGTCTGAGCCGTTTAAATTACAGCAGTTCTTCTTTACTCTCCCTTCC  
CGTTCTCGCAGCCGGCATTACTATGCTCCTCACAGATCGAAACTTAAATA  
CTACCTTCTTTGACCCAGCAGGAGGAGGAGACCCAATTCTTTATCAACAC  
TTATTC-----  
-----  
-----  
-----

-----NNNNNNNNNNGAACCTTACCCATCTAACTGCCTGGGCATGCTGTTGC  
TGTCCGATGCACACCAGTGTACCAAGCTATCAGAGCTCTCCTGGGGCATG  
TGCTCAGCAACTTCCGGCCATTTGCAAGACAGAGGACTTCCCTCCAGCT  
GCCAAAGACATGGTGGTGCAGCTTCTATCCCACGAGGAGCTGGAGACAG  
AAGATGAGAGACTGGTTTATGAAGCTGCCCTTAACTGGGTCAATTATGAC  
CTGGAAAGGAGGCACTGCCATCTGCCAGAGCTGCTGAGAACAGTTCGCCT  
GGCCCTGCTACCTGCCATCTTCCCTCATGGAGAATGCTCTCCACAGAAGAGC  
TGATCAATGCCAGGCCAAGAGCAAGGAGCTGGTAGATGAGGCCATCCGC  
TGCAAGCTAAAGATCTTGCAGAATGACGGCGTGGTTAACAGCCCTGCGC  
TCGGCCGAGAAAACAGCCACGCCCTTTTTCTGTTGGGAGGGCAGACCT

TCATGTGTGACAAGCTGTATCTGGTGGACCAGAAAAGCGAAAGAGATCATC  
 CCAAGGCGGACATCCCAGCCCTAGGAAGGAGTTCAGTGCCTGCGCCAT  
 CGGCTGTAAGGTCTACATCACAGGCGGGA--GAGGCTC-AGAAAACGGCG  
 TGTCTAAAGACGTATGGGTCTATGACACCGTCCACGAGGAATGGTCCAAG  
 GCAGCACCCATGCTCATTGCCAGATTTGGTCACGGCTCTGCTGAGCTGAA  
 AACTGCCTTTACGTNNNNNNNNNNNNNNNNNNNNNNNNNNNNNNNNNNNNNNNNNNNNNNNNNNNNNNNNNNNNNNNGGATGA  
 CTACGTTGTAGTGTTCAGCCGTTCAACAA  
 CAAGGCTGATTCTGAACGAAGCGGAGCTCATCATGACGTTGGCCCAGGAA  
 TTTCAGATGAGAGTGGTTACAGTCTCCCTAGAGGAGCAAACCTTCCCCAG  
 CATCGCCAGGTGATCAGTGGTGCCTCCATGTTAGTCAGCATGCATGGAG  
 CTCAGCTTGTACCTCACTCTTCCCTGCCAGAGGAGCTGCTGTGGTGGAG  
 CTGTTCCCCTATGCTGTCAACCCAGAACAGTACCCCCATATAAAAACCCT  
 CGCTCCCTTACCAGGCATGGATCTTCAATATGTTTCCCTGGAGGAACACTA  
 TAGAGGATAAAGCTGTTACCCACCCAGACAGACCCCTGGGAAGAAGGAGGC  
 ATCGCCCATTTGGAAAAGGACGAGCAGGAGCGAATACTGGCCAGCAAGGA  
 TGTCCCAGACACCTGTGCTGCCGCAACCCAGAGTGGCTCTTCCGAATCT  
 ATCAGGACACTTTGGTCGACATCCCTTTCATTCGTGGAAGTCCTCAA---A  
 GAGGGCTGAAG---ACCAGGCCAGCTTGAAGAA---GGCCAAGCTGGC  
 CAGCACGGTACATCCAGGCCGGGTGAGAGAACCCAGTGCCACACCTCGG  
 TCCAAGCCACCAACGAGGCTAAACTCACGGTTTCCCTGGCAGATCCCATGG  
 AATCTGAAATACCTGAAGGTGCGAGAAGTGAAGTACGAGGTGTGGATCCG  
 GAAGAAGGATACCAGCAAGGGGACACTGGAGGATCAAATCATCCAGGCAA  
 ACCCAGCGCTGGAGGCTTTTTGGTAATGCCAAAACAGTGAGGAATGACAAC  
 TCATCTCGTTTTGGAAAATTTCATCCGAATTCACTTTGGAACCAGTGGCAA  
 GCTGTCTCTGCTGATGTTGAAACCTACCTATTGGAGAAGTCACGTGTCA  
 CCTTTCAACTCAAGGCTGAAAGGAACCTACCACATCTTCTTCCAGATATTG  
 TCCAATCAGAAGCCGGAAGTGTGGACATGCTGTTGATCACCAACAATCC  
 ATATGACTACTCTACATCTCCAAGGAGAGGTAACAGTAGCATCCATCA  
 ACGACTCAGAGGAGCTGATGGCCACTGACAGCGCCTTTGACGTGCTTGGC  
 TTTACTCTTGACGAGAAGATGGGAGTATATAAACTGATTGGTGCCATTAT  
 GCACTATGGCAACATGAGATTTAAGCAGAAGCAGCGTGAAGAGCAGGCTG  
 AGCCTGACGGAACAGAGGCTGCTGATAAGTCAGCTTACCTTATGGGGCTG  
 AACTCTGCAGACCTCATCAAAGGGCTATGCCATCCAGAGTCAAGGTAGG  
 AAATGAATATGTCACCAAAGGCCAAGGTGTAGACCAAGTCTACTACCCCA  
 ACAAGGAGGCCTTCAAGTGCAGGAGTGTGGCAAGCACTACAACACCAAG  
 CTGGGATACAAGCGCCATGTGGCCATGCACTCTGCCACGGCGGGGATCT  
 CACCTGCAAAGTGTGCATGCAGACCTATGAGAGCACGCCGGTGTCTCTGG  
 AGCACCTTAAGAGTCACTCGGGGAAGTCCTCGGGTGGCACCAAGGAGAAG  
 AAACACCCGTGCGACCACTGTGACCGCCGCTTCTACACGCGCAAGGATGT  
 GAGACGGCACATGGTGGTCCACACGGGCCGGAAGGACTTCCTGTGCCAGT  
 ACTGTGCCAGCGCTTCGGCAGGAAGGACCACCTGACGCGCCACGTGAAG  
 AAGAGCCACTCGCAGGAGCTGCTGAAGATCAAGACAGAGCCTCCAGATAT  
 GTTAGGTCTTTTAGCTTCTGGCTCACCAACCCTGCTCTGTGAAGGAGGAGC  
 TCAGCCCCATGATGTGCGGCATGGGTCCCAACAAAGACCCCATGATGGGC  
 AAACCCTTCCCCAGCGGGACCCCTTTCCCCATGGGCATGTACAACCCCA  
 CCAT-----CTCCAGGCCATGTCTAATTCTGGGGTGGGTCAACCA----  
 --CACCCATCCCTGATGCCAGTTCCTTGTCTGCAGCTATGGGCATGGCC  
 TGTCACATGGAG-----  
 -----  
 -----  
 -----  
 -----  
 -----



TTTCCACACGGCGTTCATGCTATTCTGTGTCAGCGTCACTCGCTACCTGG  
CTATTGCGCATCACCGTTCTACACCAAGAGGCTGACCTTCTGGACCTGT  
CTAGCCGTCATCTGCATGGTGTGGACGTTGTCAGTAGCCATGGCTTTTCC  
CCCGGTGCTGGACGTAGGGACGTACTCCTTCATCCGGGAGGAGGACCAGT  
GCACATTCAGCACCGTTCTTTTTCAGGGCCAATGACTCACTGGGCTTCATG  
CTCCTGCTGGCACTCATCCTCCTGGCCACACAGCTGGTTTACCTCAAGCT  
CATCTTCTTTGTCCACGACCGTTCGGAAGATGAAGCCCGTCCAGTTCGTGC  
CCGCCGTCAGCCAGAACTGGACCTTCCATGGGCCAGGCCAGTGGGCAG  
GCGGCGGCTAACTGGCTCGCTGGATTGTTGGGAGAGGCCCCACCCCGCCTAC  
CTTGCTGGGCATCCGGCAGAACAGCAACGCGGGCCGCGAGGCGTCTGC  
TGGTGTGGATGAGTTCAAAACAGAGAAGAGGATTAGTAGGATGTTCTAC  
ATCATGACGTTTTTCTTCTGGCGTTGTGGGGGCCCTATCTGGTAGCCTG  
CTACTGGCGGGTGTGTTGCAAGGGGCCCGTAGTCCCTGGGGGCTACCTGA  
CGGCAGCCGTGTGGATGAACTTTGCCAGGCTGGGGTCAATCCCTTCATC  
TGCATCTTNNNNNNNNNNNNNGCCAAATCTCGCTTTCACCCTGGCGTGGGGACTGGTCCTGGC  
ACGGAGC---GCAGCGTCCCCTCGGCAACAGCTTGCATCCCCGCAGCA  
AACCAGGAGGCCACTGTTGCCACCCCCCGCAGCGATGGTTTGTACCC  
---CTGCCAACACCGACTGGACTTTGCTGCCTCGGCATACGACGCTGCC  
-----GATTTGCGCCGTAACGCGGCCACCTTGTGTCTACGCAGC  
GGCCGGAGTGAAGGCTC-----TTCCTTGCCTCGGCTGCAGGCTGCTCCA  
ACCGGCCGCTTGGCTATTACGCAGACCCGTCGG---GCTGG---GGCGGA  
CGCACGCCGCCGAGTACTGTAGCGTAAACAGCAAACCGAGCTCGGTCTT  
TTCTGTTGGCCCTCCAACCTCTGTGCGGCGCAGAGCGGGCC---CC---A  
ACTACCTGG-----CCGAGGA---CGGA---GACGC---CATCCCG  
ACGGAGAGATCCCCG---AT---CGGTGGCTCCGAGGAG---ACGAAACC  
CAAGGACCT-----GTCGGA---GTCGAGCTGGATAGAG---ACGCCGT  
CCTCCATAAAGTCAATCGATTCAAGCGATTCTGGGATCTTCG---AACAG  
GCCAAAAGGAGGAGAATCTCGCCCTCTGCCACGCCG-----GTTTC  
AGAAACTGTGTCCCCGTTAAATCTGAGCATCACTCAACAGGCGAAGTCA  
CAGAGAGAGAAGTGGCGTTGGGGATAAATCCGTTGCGGACGGGATGGGC  
GCCTTCAAAATCAACCACAGCTCCCACGATATTGGCTCCGG---ACAGAC  
GGCGTTTTCTCCAGGCG---CCCGGCTAC---GCAGCGCCGCCCTGG  
GA---CACCATCA-----CCACCCGACCCACGTTGGCTCT---TACTCC  
ACGGCGGCTTTCAACTCCACCCGGACTTTCTCTTTAGAAATCGGGGCTT  
CGGAGACGCCACTGG-----GGCGCAGCACAGTTTGTTCGCCT  
C-----CGGAAGTTT---C-----GCAGGGCCACATGGACACTCA  
GATGCCCGGGACACCTGCTCTTCCAGGACTCCACGAG---CAAGCAGC  
GAGCCACGCGTCTTCTAATGTGGTCAACAGCCAGATGCGACTGGGCTTCT  
CGGGGGACATGTACGGTTCGGGCCGACCAGTATGGCCACGTTACAAGCCCA  
AGGT---CCGACCACTATGCTTCGACCCAGTTGCACGGCTATGGCCCAT  
GAACATGAATATGGCCGCA---CACCACGGAGCAGGGGCCTTCTTTCGAT  
ACATGAGGCAGCCGATCAAACAAGAGCTCATCTGCAAGTGGATCGAGCCG  
GAGCAACTGACGAATCCCAAAAAGTCGTGCAACAAAACCTTTTAGTACGAT  
GCATGAGCTGGTGACCCATCTGACGGTGGAGCATGTGGGGGGACCAGAGC  
AGTCCAACCACATCTGCTTCTGGGAAGACTGCGCCAGAGAAGGGAAACCA  
TTCAAAGCCAAATACAACTTGTGAATCATATCAGAGTACACACCCGGAGA  
GAAACACTTTCATGTCCGTTTCCCGGCTGTGGCAAA  
>Aulotrachichthys sajademalensis  
-----  
-----  
-----  
-----  
-----

-----  
-----  
-----  
-----  
-----  
-----  
-----  
-----  
-----  
-----  
-----  
-----  
-----

-----TTTCTAGAGAGAAAACCTTCATCCATCTAACTGCCCTGGG  
CATGCTGTTGCTGTCCGATGCACACCAGTGTACCAAGCTATCAGAGCTCT  
CCTGGGGCATGTGCCCTCAGCAACTTTCCGGCCATTTGCAAGACAGAGGAC  
TTCTCCAGCTGCCCAAAGACATGGTGGTGCAGCTTCTATCCCACGAGGA  
GCTGGAGACAGAAGATGAGAGACTGGTTTATGAAGCTGCCCTTAACTGGG  
TCAATTATGACCTGGAAAGGAGGCACTGCCATCTGCCAGAGCTGCTGAGA  
ACAGTTGCTGGCCCTGCTACCTGCCATCTTCCCTCATGGAGAATGTCTC  
TACAGAAGAGCTAATCAATGCCAGGCCAAGAGCAAGGAGCTGGTAGATG  
AGGCCATCCGCTGCAAGCTAAAGATCTTACAGAATGACGGTGTGGTTAAC  
AGCCCCTGCGCTCGGCCGAGAAAAACCAGCCACGCCCTTTTTCTGTTGGG  
AGGGCAGACCTTCATGTGTGACAAGCTGTATCTGGTGGACCAGAAAGCGA  
AAGAGATCATCCCCAAGGCTGACATCCCCAGCCCTAGGAAGGAGTTCAGT  
GCCTGCGCCATCGGCTGTAAGGTCTACATCACAGGCGGGA--GAGGCTC-  
AGAAAACGGCGTGTCTAAAGACGTATGGGTCTATGACACCGTCCAYGAGG  
AATGGTCCAAGGCAGCACCCATGCTCATTGCCAGATTTGGTCACGGCTCT  
GCTGAGCTGAAACACTGCCTGTACGTAGTAGGAGGTCACACGGCAGCAAC  
TGGCTGCCTCCCAGCCTCTCCCTCCGGATGACTACATTGTAGTGTTCAGC  
CGTTCAGCAACAAGGCTGATTCTGAACGAAGCGGAGCTCATCATGACGCT  
GGCCAGGAATTTTCAGATGAGAGTGGTTACAGTCTCCCTAGAGGAACAAA  
CCTTCCCCAGCATCGCCCAGGTGATCAGTGGTGCCCTCCATGTTAGTCAGC  
ATGCATGGAGCTCAGCTTGTCACTCACTCTTCCCTGCCAGAGGAGCTGC  
TGTGGTGGAGCTGTTCCCCTATGCTGTCAACCCAGAACAGTACACCCCAT  
ATAAAACCCTCGCCTCCTTACCAGGCATGGATCTTCAATATGTTTCCCTGG  
AGGAACACTATAGAGGATAACACTGTTACCCACCCAGACAGACCCCTGGGA  
AGAAGGAGGCATCGCCCATTTGGAAAAGGACGAGCAGGAGCGAATACTGG  
CCAGCAAGGATGTCCCAGACACCTGTGCTGCCGCAACCCAGAGTGGCTC  
TTCCGAATCTATCAGGACACTTTGGTGGACATCCCTTCATTTCGTGGAAGT  
CCTCAA---AGAGGGCCTGAAG---ACCAGGCCAGCTTGAAGAA---GG  
CCAAGCTGGCCAGCACGGTACATCCAGGCCGGGTGAGAGAACCCAGTGC  
CACACCTCGGTCCAGGCCACCAACGAGGCTAAACTCACGGTTTCCTGGCA  
GATCCCATGGAATCTGAAATACCTGAAGGTGCGAGAAGTGAAGTACGAGG  
TGTGGATCCAGAAGAAGGATACCAGCAAGGGGACACTGGAGGATCAAATC  
ATCCAGGCAAACCCAGCGCTGGAGGCTTTTGGTAACGCCAAAACAGTGAG  
GAATGACAACACTCATCTCGTTTTGGAAAATTCATCCGAATTCACTTCGGAA  
CCAGTGGCAAGCTGTCTCTGCTGATGTTGAAACATACCTATTGGAGAAG  
TCACGTGTCACCTTCAACTCAAAGCTGAAAGGAACTACCACATCTTCTT  
CCAGATATTGTCCAATCAGAAGCCGGAAGTGTGGACATGCTGTTGATCA  
CCAACAATCCATATGACTACTCCTACATCTCCCAAGGAGAGGTAACAGTA  
GCATCCATCAACGACTCAGAGGAGCTGATGGCCACTGACAGCGCCTTTGA  
CGTGCTTGGTTTTACTCTTGACGAGAAGATGGGAGTATATAAACTGATTG  
GTGCCATTATGCACTATGGCAACATGAGATTTAAGCAGAAGCAGCGTGAA  
GAGCAGGCTGAGCCTGACGGAACAGAGGCTGCTGATAAGTCAGCTTACCT

TATGGGGCTGAACTCTGCAGACCTCATCAAAGGGCTATGCCATCCCAGAG  
TCAAGGTAGGAAATGAATATGTCACCAAAGGCCAAGGTGTAGACCAAGTC  
TACTACCCAAACAAGGAGGCCTTCAAGTGCAGGAGTGTGGCAAGCACTA  
CAACACCAAGCTGGGATACAAGCGCCATGTGGCCATGCACTCTGCCACGG  
CGGGGACCTCACCTGCAAAGTGTGCATGCAGAGCTATGAGAGCACGCCG  
GTGCTCCTGGAGCACCTTAAGAGTCACTCGGGGAAGTCCTCGGGCGGCGC  
CAAGGAGAAGAAACACCCGTGCGACCACTGCGACCGCCGCTTCTACACGC  
GCAAGGATGTGAGGCGGCACATGGTGGTCCACACGGGCGGAAGGACTTC  
CTGTGCCAGTACTGCGCCAGCGCTTCGGCAGGAAGACCACCTGACGCG  
CCACGTGAAGAAGAGCCACTCGCAGGAGCTGCTGAAGATCAAGACAGAGC  
CTCCAGATATGTTAGGTCTTTTAGGTTCTGGCTCACCGCCATGCTCTGTC  
AAGGAAGAGCTTAGCCCTATGATGTGCAGCATGGGTGCCAACAAGACCC  
CATGATGGGCAAACCTTCCCCAGCGGGACCCCTTCCCCATGGGCATGT  
ACAACCCCAACCAC-----CTCCAGGCCATGTCCAATTCC-----CCC  
CACCCC-----CATCCCTCTCTGATGCCTGGCTCCCTGTCTGCAGCTAT  
GGGCATGGGCTGCCACATGGAGTATCTCATCTATGCCTCTTTCTCATTCA  
TGGGATGTTTACAAAATCAGTGATGGCTCAAACATTTGTGAACTTGCTGGCT  
AGTAATTTCTCCGAGTGTTCATATGCTCTGACCCAGCAGAAATACTTCAG  
TAACTACAGTCTGTGATTGGATTTTACATTTACGAGCCCATTGAGTACT  
GGAACTCCACAGTGCAGGAGCACCTGAAGACACTGAGTCATGGCTTCAAC  
AAGATCTCCTGGATGGACAACCTTCTTCACTACCTGCGGGTGGTGAACGT  
GAGTGCCTCAACCAAGAATGACTTTATCAGCATTCTCAAGGGCTCTTTCC  
TGCGTAGCCCGGAGTACCAGCACTTCACTGAGGACATCATCTTCTCCAAG  
A---ACCGCAGAGTG-----ATGAGTATGACATTATTGCCTCGCGCAT  
GTACCTAGTGGCGCGGACCACAGAGAAGAAGCGCGAGGAGGTGGTGGAGC  
TTCTGGAGAAACTGCGTCCACTGATGCTGATCAATAGCATCAAGTTCATC  
GCCTTCAACCCACCTTTGTTTTTCATGGACCCTACAGCTCCTCAGTCAT  
CTCGCCCATCCTGACCTCAGGCTTCAGCGTGCTCACCATCCTCATCCTCA  
CTTTCTTCTGCTCATCAACCCCTTGGGAACTTCTGGCTCATCCTCACA  
GTTACTTCTGTGGAGCTGGGTGTCTTGGGTTAATGNNNNNNNNNNNNNNNNNN  
NNNNNNNNNNNNNNNNNTGCCATGTGGGCAT  
TATTAATGGGCTCTCTGGATGGGCTTCCTTGGTGGATGACTCTCCAGCTG  
ACACCATTACTCGACGGTATCGCTACGACGTGGCCCTGGTATCAGCCTTA  
AAGGATCTGGAGGAGCACATCATGGAGGGACTGAAAGAGTGTGGGCTGGA  
AGACAGCGCTTGCACCTCAGGCTTCAGTGTTATGATCAAGGAATCTTGTG  
ATGGCATGGGAGATGTCAGCGAGAAGCACGGGGGAGGACCAGCGGTCCCC  
GAGAAGGCTGTACGCTTCTCTATTACTGTTATGTCTGTCTCTGTCTGTCG  
AGATGGAGAGGAA-----GAGGCGG  
TTACCATCTTTCTTGAGCCAAAGCCCAACTCAGAACTGTCCTGTAAGCCC  
GTAAGCCTGATGTTTGTGGATGAGTCAGACCATGAGACACTCACTGCTGT  
CCTGGGACCTTTAGTGGCAGAGCGTAATGCAATGAAACAGAGTCGACTCA  
TCCTATCTATGGGTGGCCTCCCTCGTTCCTTCCGCTTCCACTTCCAGAGCC  
ACAGGATATGATGAGAAGATGGTGCCTGACATGGAGGGCCTGGAGGCCTC  
AGGTTCACCTACGCTCTGCACTCTGTGTGATTCCAGTCGAGCAGAAGCGT  
CTCACAACATGGTGTACTTCCATCACCCGCAACCATGATGAGAACATG  
GAGCGTTATGAAATATGGAGGACCAATCCCTTTTCTGAGTCTGTGGAAGA  
GCTGCGAGACCGGGTCAAAGGAGTCTCTGCTAAGCCGTTTATGGAGACCC  
AGCCCACTATTGATGCATTGCATTGTGACATTGGTAATGCCACAGAGTTC  
TACAAAATCTTCCAGGATGAGATCGGGGAGGTGTACCAGAGGGC---CAA  
C---CCCACCCGGGAGGAACGGCGAAGGTGGCGAGCAGCCCTAGATAAGC  
AACTGAGGAAGAAGATGAAGCTTAAACCAGTGTGAGGATGAATGGGAAC  
TATGCCCGGAGGCTCATGACCCTGGAGGCCGTGGAGGTGGTTTTGTGAGCT  
GGTACCCTCAGAAGAAAGGCGAAAGGCCCTGAGGGAGCTTATGGGGCTCT



ATATTCAGATGAAGCCTGTGTGGCGCTCGACCTGCCAGCCAAGGAATGC  
CCTGATGAGCTGTGCCGCTACAGCTTTAACTCCCAGCACTTTGCCGATCT  
CCTCTCCACTACCTTCAAATATAGGTACAATGGAAAGATCTCCAATTACC  
TGCATAAGACCCTCGCCCATGTCCCTGAAATCATTGAAAGAGATGGCTCT  
ATAGGAGCCTGGGCCAGCGAGGNNNNNNNNNNNNNNNNNNNTCGTACACCATTGAGATGGCTCCGAAGG  
GCCCCAGTGAAGGAGAGTCTCAGCCTTTCTCTGCTCCATTGAAGAC  
CCCACCAAGCAGACCAAGTTCAAAGGCATCAAGACCTACATTTCTACCG  
GGTACGCCGAGCCACACGGGCCGCCCCGTCTACCGGCGCTACAAACT  
TTGACTGGCTGTACAACCGCTTGCTGCACAAGTTCCTGTGATCTCGGTG  
CCCCACCTGCCGAGAAGCAGGCCACGGGGCGCTTCGAGGAGGACTTCAT  
CGAGAAGCGAAAAGACGGCTGATCCTGTGGATGAACCACATGACCAGCC  
ACCCGGTCTCTCCAGTACGAGGGGTTTCGAGCACTTCCTGATGTGCGCC  
GACGACAAGCAGTGAAGCTGGGCAAGAGGGCGGGCGGAGAAGGACGAGAT  
GGTGGGCGCCACTTCATGCTGACCTTCCAGATTCCTAACGAGCACCAGG  
ACCTCCAGGACGTGGAGGAGCGGGTGGACTCCTTCAAGTCCTTCGCCAAG  
AAGATGGACGACAGCGTCATGCAGCTCACGCACGTCGCCTCGGAGCTGGT  
CCGCAAGCACCTGGGCGGCTTCCGGAAGGAGTTCAGCGGCTCGGGAACG  
CCTTCCAGTCCATCAGCCAGGCCTTCATGCTGGAACCCCCCACAGCTCC  
GACGGCCTCAACAACGCCATCTCCACNTCTCTCGCACGTTCTCAAACCTG  
ACCTCTCTGGGTTTCATCATTGGAGTCGGTGTGGTCGGGAACCTCCTGAT  
CTCCATCCTGCTGGTCAAAGACAAGAGCCTGCACCGCGGCCCTACTACT  
TCCTGCTCGACCTGTGCGCCTCCGACATCCTGCGCTCTGCCATCTGCTTC  
CCCTTTGTCTTACCTCTGTCAAGAATGGATCCGCCTGGACCTATGGCAC  
GCTCACCTGCAAAGTGATCGCCTTCTCGGCGTGTCTCCTGTTTCCACA  
CGGCGTTCATGCTATTCTGTGTACGCTCACTCGCTACCTGGCTATTGCG  
CATCACCGCTTCTACACCAAGAGGCTGACCTTCTGGACCTGTCTAGCCGT  
CATCTGCATGGTGTGGACGTTGTGTCAGTAGCCATGGCTTTTCCCCCGGTGC  
TGGACGTAGGGACGTACTCCTTCATCCGGGAGGAGGACCAGTGCACATTC  
CAGCACCGTTCTTTCAGGGCCAATGACTCACTGGGCTTCATGCTCCTGCT  
GGCACTCATCCTCCTGGCCACACAGCTGGTTTACCTCAAGCTCATCTTCT  
TTGTCCACGACCGTCGGAAGATGAAGCCCGTCCAGTTCGTGCCCGCCGTC  
AGCCAGAACTGGACCTTCCATGGGCCAGGCGCCAGTGGGCAGGCGGCGGC  
TAACTGGCTCGCTGGATTTGGGAGAGGCCCCACCCCGCTACCTTGCTGG  
GCATCCGGCAGAACAGCAACCGGGCGGGCCGACGGCGTCTGCTGGTGTGCTG  
GATGAGTTCAAACAGAGAAGAGGATTAGTAGGATGTTCTACATCATGAC  
GTTTTTCTTCTGCGCTTGTGGGGGCCCTATCTGGTAGCCTGCTACTGGC  
GGGTGTTTGAAGGGNCCCAGTCCCTGGGGCTACCTGACGGCAGCCG  
TGTGGATGAGCTTTGCCAGGCTGGGGTCAATCCCTTCATCTGCATCTTC  
TCTAACAGGGAGGCCAAATCTCGCTTTCACCCTGGCGTGGGGACTGGTCC  
TGGCACGGAGC---GCAGCGTCCCACTCGGCAACAGCTTGCTATCCCCGC  
AGCAAACCGAGGAGCCCACTGTTGCCACCCCCCGCAGCGATGGTTTGTGTC  
ACCC---CTGCCAACAACCGACTGGACTTTGCTGCCTCGGCATAACGACGC  
TGCC-----GATTTCCGCCGGTAACGCGGCCACCTTGCTGTCTACG  
CAGCGGCCGAGTGAAGGCTC-----TTCCTCTGCCGGCTGCAGGCTGC  
TCCAACCGGCCGCTTGGCTATTACGCAGACCCGTCGG---GCTGG---GG  
CGGACGCACGCCCGCCGAGTACTGTAGCGTAAACAGCAAACCGAGCTCGG  
TCCTTTCCTGCTGGCCCTCTAACTCTGTGCGGCGGCAGAGCGGGCC---CC  
---AACTACCTGG-----CCGAGGA---CGGA---GACGC---CAT  
CCCGACGGAGAGATCCCCG---AT---CGGTGGCTCCGAGGAG---ACGA  
AACCAAGGACCT-----GTCCGA---GTCGAGCTGGATAGAG---ACG  
CCGTCTCCATAAAGTCAATCGATTCAAGCGATTCTGGGATCTTCG---A  
ACAGGCCAAAAGGAGGAGAATCTCGCCCTCTGCCACGCCG-----G  
TTTCAGAAACTGTGTCCCCGTTAAAATCTNNNCATCACTCAACAGGCGAAGTC

ACAGAGAGAGAAGTGGCGTTGGGGATAAATCCGTTGCGGGACGGGATGGG  
CGCTTCAAATCAACCACAGCTCCCACGATATTGGCTCCGG---ACAGA  
CGGCGTTTTCTCCCAGGCG---CCCGGTAC---GCAGCGGCCGCCCTG  
GGA---CACCATCA-----CCACCCGACCCACGTTGGCTCT---TACTC  
CACGGCGGCTTTCAACTCCACCCGGGACTTTCTCTTTAGAAATCGGGGCT  
TCGGAGACGCCACTGG-----GGCGCAGCACAGTTTGTTCGCC  
TC-----CGGAAGTTT---C-----GCAGGGCCACATGGACTC  
AGATGCCGCGGGACACCTGCTCTTCCCAGGACTCCACGAG---CAAGCAG  
CGAGCCACGCGTCTTCTAATGTGGTCAACAGCCAGATGCGACTGGGCTTC  
TCGGGGGACATGTACGGTCGGGCCGACCAGTATGGCCACGTTACAAGCCC  
AAGGT---CCGACCACTATGCTTCGACCCAGTTGCACGGCTATGGCCCCA  
TGAACATGAATATGGCCGCA---CACCACGGAGCAGGGGCCTTCTTTCGA  
TACATGAGGCAGCCGATCAAACAAGAGCTCATCTGCAAGTGGATCGAGCC  
GGAGCAACTGACGAATCCCAAAAAGTCGTGCAACAAAACCTTTTAGTACGA  
TGCATGAGCTGGTGAACCATCTGACGGTGGAGCATGTGGGGGGACCAGAG  
CAGTCCAACCACATCTGCTTCTGGGAAGACTGCGCCAGAGAAGGGAAACC  
ATTCAAAGCCAAATACAACTTGTGAATCATATCAGAGTACACACCCGGAG  
AGAAACCCTTTCCATGTCCGTTCCCCGGCTGTGGANN

>Avocettina infans

AGCCTGCTAATCCGGGCGGAGCTGAGTCAACCCGGAGCCTTTTTGGGAGA  
CGACCAAATTTATAACGTCATCGTTACAGCACACGCTTTCGTGATAATTT  
TCTTTATGGTAATACCAATCATGATTGGAGGCTTTGGAAACTGGCTAGTT  
CCCCAATGATCGGAGCCCCAGACATGGCCTTCCCACGAATAAACAACAT  
AAGCTTTTGGTTGTTACCCCCTTCATTTCTTCTATTGTTATCCTCCTCGG  
GAGTTGAAGCCGGGCGGAACAGGATGAACGGTCTACCCCCTCTTGCT  
GGCAATTTAGCTCATGCCGGAGCATCAGTAGACCTAACCATCTTTTCTCT  
ACACTTAGCAGGTGTCTCATCAATCTTGGGGCAATCAACTTTATTACCA  
CAATTATTAACATGAAACCACCAGCCATCTCACAATACCAAACCCCTG  
TTTGTGTGATCAGTGCTTATCACTGCAGTGCTATTATTATTATCACTCCC  
AGTTTTAGCTGCGGGCATTACCATGCTCCTTACAGATCGAAACTTAAATA  
CAACCTTCTTTGACCCGGCAGGAGGGGGACCCAATTTTATATCAACAT  
TTATTTGGTTCTTCGCCCACCCCGAAGTATATATTCATTATTCTCCAGG  
GTTTGGTATAATTTACACATCGTCGCATACTATGCCGGGAAAAAAGAAC  
CATTTGGCTATATAGGAATAGTCTGAGCCATGATGGCCATTGGACTCCTC  
GGGTTATTGTCTGAGCACACCACATGTTTACAGTGGGTATAGACGTAGA  
CACACGAGCCTA-----

-----  
-----  
-----  
-----  
-----  
-----  
-----  
-----  
-----  
-----  
-----  
-----  
-----  
-----  
-----  
-----  
-----  
-----  
-----

-----TGACGAGTATATTGTGGTCTTCAGC  
CGCTCTCTTAACCGGCTTATCCTGAACGAGGCAGAGCTGATCCTGGCACT

AGCGCAGGAGTTCCAAATGAAGGTTGTTACCGTGTCCTGGAGGAGCAGT  
CCTTTGCAGACATCGTCCGAGTCCTCAGCAGGGCGTCGATGCTGGTCAGT  
ATGCATGGGGCCCAGCTGGTCACCTCTCTCTTCCCTCCTCGTGGGGCAGC  
TGTGGTGGAGCTGTACCCATATGCAGTCAACCCAGAGCATTATGCTCCGT  
ATAGGACGCTGACCTCGCTGCCGGCATGGACCTGCAGTATGTGGCCTGG  
AGGAACACCAAAGAGGAGAACTCTGTGACCTTCCCTGAGCGTGCCTGGGA  
CCAGGGTGGCATTGCACACTTGGAGAAGGAGGAGCAGGAACGTATCATGA  
AGAGCAAGGAGGTGCCGCGACACCTGTGCTGTGCGAACCCGGAGTGGCTC  
TTCCGCATCTACCAGGACACCAATGTGGATGTTGCGTCTCTTCTGGAAGC  
CCTGCG---CCAGGGACTGACC---TCCAGGCCAGGGCCCAAGAG---GG  
CTAGGCCCGCCAGCACAGTCCACCCAGGCAGGGTGAGGGAGCCCAAGTGC  
CAGACCTCCGTCCAGGCAACCAACGAG-----G-----  
-----  
-----AAGAAAGATACCAGCAAGGGAACACTGGAGGATCAAATT  
ATCCAGGCAAACCCAGCGCTGGAGGCTTTTGGCAAATGCCAAGACTTCGAG  
GAATGACAACCTCCTCACGTTTTTGGGAAATTTATTCGTATTCATTTTCGGAA  
TAAGTGGCAAGCTGTCTCTGCTGACGTAGAAACCTACCTACTCGAGAAA  
TCCCGTGTACCTATCAGCTAAAAGCTGAGAGGAACTATCACATTTTCTA  
CCAGATCACATCCAACAAAAGCCAGAATTAAGTGGACATGCTGTTGATCA  
CCAACAACCCGTATGATTATGCTTATGTCTCCCAAGGAGAGGTGACGGTT  
GCATCCATCGATGACTCAGAGGAACTGATCGCCACAGACAGTGCCTTCGA  
TGTGCTGGGCTTACGCCGAGGAGAAGATGGGTGCTTACAAGCTGACGG  
GTGCCATCATGCATTACGGAACATGAAATTCAAGCAGAAGCAACGTGAG  
GAGCAGGCCGAGCCTGATGGCTCTGAGTCTGCTGACAAGTCAGCCTTCCT  
GATGGGGCTGAACTCGCCGACCTTCTCAAGGGACTGTGCCATCCACGGG  
TCAAAGTTGGAAATGAGTATGTACCAAAGGTCAAATGTGGATCAAGTC  
TACTATCCCAACAAAGAGGCCTTCAAGTGCGAAGAGTGCAGCAAGAACTA  
CAACACCAAGCTGGGCTACAAGCGCCACGTGGCCATGCACGCAGCCACCA  
GCGGCGACCTCACCTGCAAGGTGTGTCTGCAGAGCTACGAGAGCACGCCT  
GTGCTGTTGGAGCACCTCAAGAGCCACTCGGGGAAGTCCTCCGGTGGGGC  
CAAGGAGAAAAGCACCCCTGCGACCACTGCGACCGCCGCTTCTACACGC  
GCAAGGACGTGCGACGCCACATGGTGGTGCACACCGCCGCAAGGACTTC  
CTGTGCCAGTACTGCGCCAGCGCTTCGGCCGAAAGGACCACCTGACCCG  
GCATGTGAAGAAGAGCCACTCGCAAGAGCTGTGAAGATCAAGACAGAGC  
CGCCGACATGTTGAGCCTGTGCGGTTCCGGCTCTCCACCCTGCTCTGTA  
AAAGAGGAGCTCAGCCCCATGATGTG---TATGGGCCCCCTCAAGGACTC  
CCTGATGGGCAAGCCCTTCCCTGGTG-----CTTCCCCATGGGCATGT  
ACAACCCCCAC-----CTGCAGGCTATGTCCAACCTCAGGGGTGTCC  
-----CACCCTCTCTGGTGTCTGGGTCACCTGTCTGCTGCCAT  
GGGAATGGGCTGCCACATGGAGTACCTGATCTACGCTTCGTTTTTCGTTCA  
TGGGATGTTTACAAATCAGCGACGGGTCGAACGTGATCAACCTCCTGGCC  
AGCAACTCCCCGAGCGTACCTACGCTCTGACCCAGCAGAAGTACTTCAG  
CAACTACAGTCCGGTCATCGGGTCTACATCTACGAACCCATCGAGTACT  
GGAACGCCACGGTTCAAGAGCACCTGAGGACGCTGGGCCACGGTTTCAAT  
AAGATTTTCGTGGATCGACAACCTTCTTTCAGCATCTGAAGGTGGTGAACGT  
CAGCGTGTGACCAAAAAGCGAATTCATAACCATCCTCCAGACGTCCCTCC  
TGAGGAGCCCAGAGTACCAGCACTTCAAGGACGACATCATATTTTACAAA  
A---TTAGGG-----ACGAGATGGAGATCATGGCATCCCGGAT  
GTATCTGGTGGCCGAACCATGGAGAAGACTCGAGAGGAGGTGGTGGAGC  
TACTGGAGAGGCTGAGGCGCTCTCTCTCGTCAACAGCATCAAATTCATC  
GTCTTCAACCCACCTTCGTCTTCATGGATCGGTACAGCTCGTCCGGTCAT  
CTCCCCATCCTCACTTCGTGCTTCAGCGTCCCTGATCGTCCCTGATCCTGA  
CCTTCTTCCCTGGTCATCAACCTCTGGGAAACTTCTGGCTGATACTGACA

GTCACCTCGGTGGAGCTGGGAGTCCTGGGCCTAATG-----

-----TCCTACA  
CTATTGAAATGGGATCCTGGGGGCCCCAGTGGAAGGAGAGCCCCAGCCA  
TTCTCCTGCTCCATAGAGGACCCACCAAGCAGACCAAGTTCAAGGGCAT  
AAAGACTTACATCTCATACCGTGTGACACCCAGCCACACAGGCCGGCCTG  
TGTACCGCCGCTACAAGCATTGACTGGCTGTACAACCGGTTGCTGCAC  
AAGTTCACCGTCATCTCTGTCCCTCACCTGCCTGAGAAGCAGGCCACAGG  
TCGCTTCGAGGAGGACTTCATTGAGAAGCGCAAGCGGGGCTCATCCTAT  
GGATGAACCACATGACCAGTCACCCGGTGCTCTCGCAGTATGAGGGTTTC  
GAGCACTTCCTGATGTGCGCTGATGACAAGCAGTGGAAGCTGGGAAAGCG  
GCGGGCAGAGAAGGACGAGATGGTGGGCGCGCACTTCATGCTCACCTTCC  
AGATTCCCAATGAGCACCAGGACCTGCAGGACGTGGAGGAGAGGGTGGAC  
TCTTTCAAGGCCTTTGCCAAAAAGATGGATGACAGCGTACTGCAGCTCAC  
GCACACGGCCTCCGAGCTGGTGCGCAAGCATCTGGGAGGCTTCCGGAAGG  
AATTCCAGAAGCTGGGGAATGYCTTCCAGTCCATCAGCCAGGCGTTCACT  
CTGGATCCTCCCCACTGCTCTGATGCCCTCAACACCGCTTAT----C--



-----  
-----  
-----  
-----  
-----  
-----  
-----  
-----

-----NNNNNNNNNGAAACCTTCACCCATCTAACTGCCTTGGCATGCTGTTG  
CTGTCTGATGCCACCAGTGCACCAAGCTGTCAGAGCTCTCCTGGGGCAT  
GTGCCTCAGCAACTTCCAGCTATTTGCAAGACAGAGGACTTCTCCAAC  
TGCCCAAAGATATGGTGGTGCAGCTTTTGTACACGAGGAGCTAGAGACA  
GAAGATGAGAGACTGGTTTATGAAGCTGCCCTCAACTGGATCAACTATGA  
CCTGGAAAAGAGGCACTGCCACCTTCCAGAGCTCCTGAGAACGGTCCGCC  
TGGCCCTGCTGCCATCTTTCTCATGGAGAATGTTTCTACAGAAGAG  
CTGATCAATGCCCAGGCCAAGAGCAAGGAGCTGGTGGATGAAGCTATCCG  
CTGTAAGCTGAAGATCCTGCAGAATGATGGCGTCGTTAACAGTCCATGTG  
CTCGACCAAGAAAAACCAGCCATGCTCTCTTTCTTCTGGGAGGGCAGACT  
TTCATGTGTGACAAGTTGTACCTGGTGGACCAGAAAGCCAAAGAGATCAT  
CCCCAAAGCTGACATTCAGCCCCAGGAAGGAGTTCAGCGCCTGCGCCA  
TCGGCTGTAAGGTGTACATCACTGGTGGGA--GAGGCTC-AGAGAATGGT  
GTGTCCAAAGATGTGTGGGTCTACGACACCGTCCACGAGGAATGGTCGAA  
GGCGGCACCCATGCTCATTGCCAGGTTTGGCCATGGCTCTGCGGAGCTGA  
AACACTGCCTCTACGNNNNNNNNNNNNNNNNNNNNNNNNNNNNNNNNNNNN  
AATACATTGTTGTGTTTAGTCGTTCAACAA  
CGAGGTTGATACTGAATGAAGTGGAGCTAATCATGGCGCTGGCCCAAGAG  
TTCCAGATGAGAGTGGTACGGTATCCCTGGAGGAACAGTCTTTCCCAG  
TATCGTCCAGGTGATCAGTGGTGTCTCCATGTTAGTCAGTATGCATGGAG  
CTCAGCTTATCACCTCACTCTTCTCCAGAGGAGCTGCTGTGGTGGAG  
CTGTTCCCTTTGCTGTGAACCCAGAGCAGTACACCCCGTATAAAACCC  
TGCCCTCCCTTCCAGGCATGGACCTTCACTATGTCTCTTGGAGGAACACTA  
AGGAGGAGAACACCATCACCCACCCAGACAGACCCGGAACAAGGGGGC  
ATTGCTCACTTGGAGAAGGAGGAGCAAGAGCGAATACTGGCGAGCAAAGA  
TGTCCCAGGCACCTGTGCTGCCGCAACCCAGAGTGGCTCTTCCGGATCT  
ACCAGGACACTTTGGTGGACATCCCTTCTTCTGGAAGTCCTCAA---A  
GAGGGCATGAAG---ACAAAGCCCAGCTTGAAGAA---GTCAAAGCCGGC  
CAGCACAGTCCATCCGGGCCGGGTGAGAGAACCCCAATGTCAGACCTCAG  
TACAAACCACTAATGAGGCTAAACTCACAGTCTCCTGGCAGATCCCCTGG  
AATCTGAAATACCTGAAAGTGAGAGAGGTCAAATACGAGGTG-----  
-AAAAAGACACCAGTAAGGGGACCCGAGGATCAAATCATTGAGGCGA  
ACCCGCGCTGGAGGCCCTTCGGCAACGCCAAAACGTTGAGAAAACGACAAC  
TCGTCTCGTTTTGGAAAATTCATCCGAATTCCTTCGGTACGAGTGGCAA  
GCTGTGCTGCTGACATCGAGACGTACCTGCTGGAGAAGTACAGTGTCA  
CCTTTCAGCTCAAGGCTGAGAGGAACACCACATCTTCTACCAGATCCTG  
TCCAATCAGAAGCCAGAGCTCCTGGACATGCTGCTGATCACCACAACCC  
GTACGACTACTCCTACATCTCCAAGGAGAAGTAACGGTTCGCCTCCATCA  
ATGACTCAGAGGAGCTGATGGCCACCGACAGCGCTTCGATGTGCTCGGC  
TTCACTCCAGACGAGAAGATGGGTGTCTATAAACTGACTGGCGCCATCAT  
GCACTACGGCAACATGAAGTTCAAACAGAAGCAGCGTGAGGAGCAAGCGG  
AGCCGGATGGGACGGAAGCTGCTGATAAATCAGCTTACCTAATGGGGCTG  
AACTCTGCTGACCTCATCAAAGGGCTGTGCCATCCAGAGTCAAGGTAGG  
AAATGAATACGTCACCAAAGGCCAAAGTGTGGACCAAGTCTACTACNNNNNN  
NNNNNNNNNNGGAA  
GCACTACAACACCAAGCTGGGATATAAGCGCCATGTGGCCATGCACTCTG

CCACGGCAGGGGATCTTACCTGTAAAGTGTGCATGCAGACCTACGAGAGC  
ACACCCGTGCTCTTGGAGCACCTCAAGAGCCACTCCGGGAAGTCTTCGGG  
TGGTACCAAGGAGAAAAACACCCGTGCGACCACTGTGACCGTCTTTCT  
ACACACGGAAGGATGTGAGACGCCACATGGTGGTCCACACGGGCCGAAAG  
GACTTCCTGTGCCAGTACTGTGCCAGCGCTTCGGCAGGAAGGACCATCT  
GACACGGCACGTGAAGAAGAGCCACTCGCAGGAGCTGCTGAAGATCAAGA  
CGGAGCCTCCTGATATGTTAGGTCTTTTAGCGTCTGGGTCAACCCTGC  
TCTGTGAAGGAGGAGCTCAGCCCCATGATGTGCGGCATGGGTCCCAACA  
AGACCCCATGATGGGCAAACCGTTCCCAGTGGGGCCCTTTCCCGATGG  
GCATGTACAACCCCAACCAT-----CTCCAGGCCATGTCTAATTCGGG  
GTGGGTCACCCA-----CACCCGTCCCTGATGCCAGTTCCTTGTCTGC  
AGCTATGGGCATGGGCTGCCACATGNNNNNNNNNNNNNNNNNNNNNNNNNNN  
NNNNNNNNNNNNNNNNNNNNTCGTGAACCTGCTGGCTAGTAACTC  
TCCGAGTGTTTTCTTACGCTCTGACCCAGCAGAAATACTTTCAGTAACTACA  
GTCCCGTGATTGGGTTTTTACATTTACGAGCCATCGAGTACTGGAACCTCA  
ACGGTGCAGGAGCACCTGAAGACTCTGAGTCATGGCTTCAACAAGATCTC  
CTGGATGGACAACCTTTTTTCCACTACCTGCGGGTGGTGAATGTGAGTGCCT  
CAACCAAGAGCGACTTTCATCACCATCCTCAAGGGGTCCTTCTGCGCAGC  
CCGGAGTACCAGCACTTCACCGAGGACATCATATTCTCCAAGA---ACCG  
CGAGACTG-----ATGAGTACGACATTATCGCCTCACGGATGTACTTGG  
TGGCGCGGACGACAGAGAAGAAGCGCGAAGAGGTTGGTGGAGCTTCTGGAG  
AAGCTTCGTCCGTTGATGCTGATCAACAGCATCAAGTTCATTGCCCTTCAA  
TCCTACGTTTTGTGTTTCATGGACCGCTACAGCTCCTCTGTCTATCTCGCCCA  
TTCTGACCTCAGGCTTCAGCGTACTCACAATCCTCCTCATCTTCTTTC  
CTGGTCAACACCCCTTGGGAAACTTCTGNNNNNNNNNNNNNNNNNNNNNNNNN  
NNNNNNNNNNNNNNNNNNNNNNNNNNNNNNNNNNNNNNNNNNNNNNNNNNNN  
NNNNNNNNNNNNNNNNNNNNNNNNNNNNNNNNNNNNNNNNNNNTCTTGCAATGTTGG  
CATTATT  
AATGGGCTCTCTGGATGGGTTTTCTCGGTGGATGACTCCCCAGCTGACAC  
CATCACTCGTCGGTTTTCGCTATGATGTGGCACTGGTGTGAGCAATAAAGG  
ATCTGGAGGAGGACATCATGGAGGGGCTGAGAGAGAGTGGGATGGAAGAC  
AGTGCGTGCACCTCAGGCTTCAGTGTTCATGATCAAGGAATCTTGTGACGG  
CATGGGCGATGTGAGGAGAAAGCAGCGGTGGAGGACCAGTGTTCCTGAGA  
AGGCTGTACGTTTTCTTCTTACTGTATGTCTGTCTCTGTCTGCGCAGAC  
GATGAGGAC-----GAAGAGGTTAC  
CATCTTCACCGAGCCAAAGCCAAACTCAGAAGTGTCTGTAAGCCTCTTT  
GCCTGACATTTGTGGATGAGTCAGACCATGAGACGCTCACAGCCGTCCTG  
GGCCATATAGTTGCAGAGCGTAATGCAATGAAAGAGAGCAGGCTCATCCT  
ATCCATGGGTGGACTACCTCGCTCCTTCGGCTTTCACTTCAGAGGCACGG  
GATACGATGAGAAGATGGTGCCTGAGATGGAGGGCCTCGAGGCCTCGGG  
TCCTCCTATATCTGCACTCTTTGTGACTCCAGTCGGGCAGAAGCCTCTCA  
GAACATGGTGTACTACTCCGTACCCGCAGTCATGAAGAGAACCTAGAAC  
GTTACGAAATATGGAGAACCAACCCCTTTTCTGAGTCTGTAGATGAGCTG  
CGAGACAGAGTCAAAGGGGTCTCTGCCAAGCCCTTCATGGAGACCCATCC  
CACGCTGGATGCATTACACTGTGACATTGGCAATGCCACTGAGTCTTACA  
AAATCTTCAGGACGAGATCGGGGAGGTGTACCAAAAAGGT---CAAC---  
CCCAGCCGGGAGGAACGGCCTAGCTGGAGGGCAGCCCTAGATAAAACAGCT  
GAGGAAGAAGATAAAGCTTAAACCGGTAATGAGGATGAATGGGAACATG  
CCCCGAGGCTAATGACCCAGGAGACTGTGGAGGTGGTGTGTGAGCTGGTG  
CCCTCAGAGGGGAGGAGGGAGGCCCTGAGGGCGCTTATGAGGCTCTACCT  
CCAGATGAAGCCTGTGTGGCGGCCACCTGCCAGCCAAGGAGTGCCCCG  
ACCAGCTGTGCCGCTACAGCTTTAACTCCAGCGCTTTGCCGACCTCCTC  
TCCTCTACCTTCAAAATATAGGTACAAAGGATAACCAATTACCTGCA  
CAAGACCTGGCCATGTGCCNNNNNNNNNNNNNNNNNNNNNNNNNNNNNNNNNNN





CCTGGGA---CACCATCA-----CCACCCGACCCACGTTGGCTCT---T  
ACTCCACGGGCGGCTTTCAACTCCACCAGGGACTTTCTCTTCAGAAATCGG  
GGTTTCGGGGACGCCACCGG-----GGCGCAGCACAGTTTGTT  
CGCCTC-----CGGAAGTTT---C-----GCAGGGCCACATGGAC  
ACTCAGATGCAGCGGGGACCTGCTCTTCCCAGGGCTCCACGAG---CAA  
GCGGCGAGCCATGCGTCTTCCAACGTGGTCAACAGCCAGATGCGGCTGGG  
CTTCTCGGGGGACATGTACGGACGGGCGGACCAGTACGGCCACGTTACAA  
GCCCCGGGT---CCGACCACTATGCTTCGACCCAGCTGCACGGCTATGGC  
CCCATGAACATGAATATGGCCGCA---CACCACGGAGCAGGGGCTTCTT  
TCGATACATGAGGCAGCCGATCAAAACAAGAGCTCATCTGCAAGTGGATCG  
AGCCGGAGCAGCTGACGAATCCCAAAAAGTCGTGCAACAAACTTTTAGC  
ACGATGCACGAGCTTGTGACCCATCTGACGGTGGAGCATGTGGGGGGACC  
AGAGCAGACCAACCACATCTGCTTCTGGGAGGACTGGGCCNNNNNNNNNNNNNNNNNNNNNNNNNNNNNNNNNNNNNN  
NNNNNNNNNNNNNNNNNNNNNNNNNNNNNNNNNNNNNNNNNNNNNNNNNNNNNNNNNNNNNNNNNNNNNNNNNNNN  
NN

>Barathronus maculatus

-----  
-----  
-----  
-----  
-----  
-----  
-----  
-----  
-----  
-----  
-----  
-----  
-----  
-----  
-----  
-----  
-----  
-----  
-----  
-----

-----TTTCTAGAGAGAAACCTTACCCCTCTAACTGCCTCGG  
CATGCTGTTGCTATCTGATGCCCATCAGTGCACCAAGCTATCAGAGCTGT  
CCTGGGGCATGTGCCCTCAGTAACTTTCCTGCTATTTGCAAGACAGAGGAC  
TTCTCCAACACTACCCAAAGACATGGTGTTCAGCTTTTGTACATGAGGA  
GCTCGAGACAGAAGATGAGAGACTGGTTTATGAAGCTGCCCTTAACTGGA  
TCAACTATGACCTGGAAAGGAGGCACTGCCACCTCCAGACCTTCTGAGA  
ACGGTCCGCCTGGCCCTGCTTCCCTGCCATCTTCTCATGGAGAATGTCTC  
GACAGAAGAGCTGATCAATGCCAGGCAAGAGCAAGGAGCTAGTTGATG  
AGGCCATCCGCTGTAAGCTGAAGATCCTACAGAATGATGGCGTAGTTAAC  
AGCCCTTGTGCCAGACCAAGAAAACCAGCCATGCACTCTTCTGCTGGG  
AGGGCAGACTTTCATGTGTGACAAACTGTACCTGGTAGATCAGAAAGCCA  
AAGAGATCATTCCCAAAGCTGACATCCCCAGCCCCAGGAAGGAGTTCAGT  
GCCTGTGCCATTGGCTGTAAGGTGTACATCACAGGTGGGA--GAGGCTC-  
AGAAAATGGTGTGTCCAAGATGTATGGGTCTACGACACCATCCNNNNNNNNNNNNNNNNNNNNNNNNNNNNNN  
NNNNNNNNNNNNNNNNNNNNNNNNNNNNNNNNNNNNNNNNNNNNNNNNNNNNNNNNNNNNNNNNNNNNNNNN  
NNNNNNNNNNNNNNNNNNNNNNNNNNNNNNNNNNNNNNNNNNNNNNNGGATGA  
ATACATGTTCTGTTTAGCCGTTCAACAACAAGGCTGATACTGAATGAAG  
CTGAGCTAATCATGGCGCTGGCCCAGGAATTTCAAATGAGAGTGGTTACG  
GTCTCCCTGGAGGAACAATCTTCCCAAGTATTGTCCAGGTGATCAGTGG  
TGCTTCTATATTGATTAGTATGCATGGAGCTCAGCTTATCACCTCGCTTT  
TCCTCCCCAGAGGAGCTGCTGTGGTGGAGCTGTTCCCTATGCTGTAAAC



TGGAGGGATTGAGAGATTGTGGGTGGAAGACAGCACTTGCACCTCAGGC  
TTCAGTGTATGATCAAGGAATCTTGCGATGGCATGGGCGATGTCAGCGA  
GAAGCATGGCGGAGGACCACCGGTCCCCGAGAAGGCTGTACGTTTCTCTT  
TCACTATTATGTCTGTCTCTGTCTGGCAGATGACAAGGAG-----  
-----GAGGCGGTTACCATCTTTACAGAGCCAAA  
GCCAAACTCAGAGCTGTCCTGCAAACCCCTTTGCATCACATTTGTGGATG  
AGTCAGATCACGAGACTCACAGCTGTCCTGGGCCCCGTAGTTGCAGAG  
CGTGATGCAATGAAAAGAGAGTAGACTCATTCTTTCCATGGGAGGCTGCC  
TCGCTCCTTCCGCTTCCACTTCCAGAGGCACAGGTTATGATGAGAAGATGG  
TGCGTGAGATGGAGGGCCTAGAGGCTCAGGCTCTACCTATATCTGCACT  
CTGTGCGACTCCAGTCGGGAGGCTTTCGCACAACATGGTGTGCACTC  
CGTACCCGTAGTACGAAGAGAACCCTAGAGCGTTACGAAATATGGAGAA  
CCAATCCCTTTTCTGAGTCTGTAGAGGAGCTGCGGGACCGAGTCAAAGGG  
GTCTCTGCCAAGCCCTTTATGGAGACCAGCCAACAATGGATGCTTTGCA  
CTGTGACATTGGTAATGCCACTGAGTTCTACAAAATCTTCCAGGATGAGA  
TTGGGGAGGTGTACCAAAAAGGT---CAAC---CCCCACGGGAGGAACGG  
CGCAGCTGGAGGGCAGCCCTAGATAAACAGCTGAGGAAGAAAATTAAGCT  
TAAACCGATAATGAGGATGAATGGGAACCTATGCCCCGGAAGCTAATGACCA  
TGGAGGCTGTGGAGGTGGTGTGTGAGCTGGTGCATCAGAAGAGAGGAGG  
GAGGCCCTGAGGGAGCTCATGAGGCTCTACCTTCAGATGAAACCTGTTTG  
GCGTGCCTCCTGCCAGCCAAGGAATGCCCTGACCAGCTGTGCCGCTACA  
GCTTCAACTCCAGAGCTTTGCTGATCTCCTCTCCCTCAATAT  
CGCTACAATGGAATAACAATACTTGCACAAGACCCTGGCTCATGT  
CCCCGAGATTATTGAGAGAGATGGATCCATAGGAGCTTGGGCCAGTGAGG  
GGAATGAGTCAGCAAACAAA-----

-----  
-----  
-----  
-----  
-----  
-----  
-----  
-----  
-----  
-----  
-----

-----CCTCTCGCCACGTTCTCAAACCTGA  
CCTCTCTGGGCTTCATCATCGGAATCGGTGTGGTTCGAAACCTCCTGATC  
TCCATCCTGCTGGTTAAAGACAAGAGCCTGCACCGCGCCCTACTACTT  
CCTGCTGGACCTGTGCGCCTCTGACATCCTGCGTTCTGCTATCTGCTTCC  
CCTTTGTCTTACCTCTGTCAAGAATGGATCTGTCTGGACCTACGGCACG  
CTCACCTGCAAAGTGATCGCCTTCTGGGCGTGCTCTCCTGTTTCCACAC  
AGCGTTCATGCTCTTTGTGTGAGTGTGACCCGCTATCTGGCCATCGCAC  
ATCACCGTTTCTACACTAAGAGGCTGACCTTCTGGACCTGTCTGGCTGTC  
ATCTGCATGGTGTGGACGTTGTGAGTGGCCATGGCTTTCGCCGCGGTGCT  
AGACGTAGGGACGTACTCTTTTCACTCCAGGAGGAGGACCAGTGCACATTC  
AGCACCATTCCTTCCAGGGCGAACGACTCCCTGGGCTTCATGCTCCTGCTG  
GCACTCATCCTCCTGGCCACGCAGCTGGTTTACCTCAAGCTCATCTTCTT  
CGTCCATGACCGTTCGGAAGATGAAGCCTGTCCAGTTCGTGCCTGCTGTCA  
GCCAGAACTGGACCTTCCACGGGCCAGGCGCCAGCGGGCAGGCGCGGCC  
AAGTGGCTGGCTGGATTTGGTAGAGGTCCACACCTCCTACTTTACTGGG

CATCCGGCAGAACAGCAATGCAGCAGGCCGCAGGCGTCTACTGGTGCTGG  
ATGAATTCAAACAGAGAAGAGGATTAGCAGGATGTTCTACATCATGACG  
TTTTTCTTCCTGGCACTGTGGGGCCATATCTGGTAGCCTGCTACTGGAG  
GGTGTGGTGAAGGGGTCCTGTAGTCCCGTGGGCTACCTGACAGCAGCCG  
TGTGGATGAGCTTTGCCCAGGCAGGGTCAATCCTTTCATCTGCATCTTC  
TCCAACAGGGAGGCCAAGTCTCGCTTTCACCCTGGCGTGGGGGCTGCGCC  
TGGCACGGAGC---GCAGCGTCCCACTCGGCAACAGCTTGCTATCCCCGC  
AGCAAAGTGAAGGAGCCACTGTGCGCACCCCCCGCAGCGATGGTTTGTC  
ACCC---CTGCCAACAACCGACTGGACTTTGCTGCCCGCATACGACGC  
GGCT-----GATTTTGCCGGTAACGCGGCCACCTTGCTGTCTACG  
CAGCGGCCGGAGTGAAGGCTC-----TTCCCCTGCCGGCCGCAGGATGC  
TCCAACCGGCCTCTTGCTATTACGCTGACCCGTCGG---GCTGG---GG  
AGGGCGCACGCCGCCGAGTACTGTGGTGTAAATAGTAAATCCAGCTCGG  
TCTTTTCTCTGCTGGCCCGCTAACTCTATCGGGGGCAGAGCAGGCG---CC  
---CACTACCTGG-----CCGAGGA---GGGA---GACTC---CGT  
CCCCACGGAGAGGTCACCG---AT---CAGCGGCTCCGAGGAG---ACCA  
AACCAAGGACAT-----ATCAGA---GTCGAGCTGGATAGAG---ACA  
CCTTCTCCATTAAGTCCATCGATTCAGCGATTCTGGGATCTTTG---A  
ACAGGCCAAAAGGAGAAGAATCTCACCTTCTGCCACGCCG-----G  
TTTCAGAGGCAGTGTCCCCGTTTTTTTTTTTTCATCACTCAACAGGCGAAGTCACAGAGAG  
AGAAGTGGCGTTGGGGATAAATCCTTTCGCGGACGGGATGGGCGCCTTCA  
AAATAAACCACAGCTCCCATGATATTGGCTCCGG---ACAAACGGCGTTT  
TCCTCTCAGGCG---CCCGGCTAC---GCAGCGGCCGCCCTGGGA---CA  
CCATCA-----CCACCCGACCCAGTGGCTCT---TACTCCACGGCGG  
CTTTCAACTCCACCAGGACTTTCTCTTTCAGAAATCGGGGTTTTTGAGAC  
GCCACCGG-----GGCGCAGCACAGTTTGTTCGCCTC-----  
---CGGAAGTTT---C-----GCAGGGCCACATGGACACTCAGATGCAG  
CGGGGCACCTGCTCTTCCAGGGCTCCACGAG---CAAGCAGCGAGCCAT  
GCGTCTTCCAACGTGGTCAACAGCCAGATGCGACTGGGCTTTTCGGGGGA  
CATGTACGGTCCGGCCGATCAGTACGGCCACGTTACAAGCCCGAGGT---  
CCGACCCTACGCTTCGACCCAGTTGCACGGTTATGGCCCATGAACATG  
AATATGGCCGCA---CACCACGGAGCAGGGGCCCTTCTTTTCGATACATGAG  
GCAGCCGATCAAACAAGAGCTCATCTGCAAGTGGATCGAGCCGGAGCAGY  
TGACAAATCCCAAAAAGTCTTGCAACAAAACTTTGTAGCACCATGCATGAG  
CTTGTGACCCACCTGACGGTGGAGCATGTGGGGGGACCAGAGCAGACCAA  
CCACATCTGTTTCTGGGAGGAGTGCGCCAGAGAAGGAAAACCATCAAAG  
CCAAATACAAACTTGTAATCATATCAGAGTACACACCCGGAGAAAACCC  
TTTCCGTGTCCGTTCCAGGCTGTGGCAA

>Barbourisia rufa

AGCCTTCTCATCCGAGCAGAGCTAAGCCAGCCAGGTGCCCTTTTAGGGGA  
CGATCAAATCTACAACGTCATTGTTACAGCGCACGCCTTTGTAATAATTT  
TCTTTATAGTAATAACCAATTATGATTGGGGGGTTGGAAATTGATTAATT  
CCCCAATGATTGGAGCCCCAGACATAGCATTCCCTCGAATAAATAATAT  
GAGTTTTTGGCTCCTACCTCCATCCTTCTTACTGCTCCTGGCCTCTTCTG  
GGGTAGAAGCAGGCGCTGGGACAGGATGAACAGTTTATCCGCCACTTGCG  
GGCAATCTTGCCACGCAGGAGCCTCAGTAGACCTAACTATTTTCTCCCT  
CCACTTAGCAGGAGTCTCTTCAATTCAGGGGCTATTAACCTTTATTACAA  
CTATTATTAACATAAAACCCCGCAATTTCCCAATATCAAACCCCTG  
TTTGTGTGATCTGTACTAATTACAGCCGTTCTTCTCCTCCTCCTTACC  
CGTCTTGACGCCGCATCACCATACTATTAACCGACCGTAACCTAAACA  
CGACCTTCTTTGACCCCTCAGGAGGAGGTGATCCCATCCTATATCAACAC  
CTATTTTGATTCTTCCGGCCACCCA-----  
-----

-----  
-----  
-----TTTCTAGAGAGGAACCTTCACCCATCTAACTGCCTTGG  
AATGCTGTTGCTGTCTGACGCCCACCAGTGTACCAAGCTATCAGAGCTCT  
CCTGGGGCATGTGCCCTCAGCAACTTTCCTGCTATTTGTAAGACAGAGGAC  
TTTCTCCAACCTGCCCAAAGACATGGTGGTGCAGCTTCTGTCCCATGAGGA  
GCTGGAGACAGAAGATGAGAGACTGGTTTATGAAGCTGCCCTTAACTGGG  
TCAACTATGACCTGGAAAGCAGGCACTGCCAYCTGCCAGAGCTGCTGAGA  
ACGGTCCGCCTGGCCCTGCTACCCGCTATATTCCTCATGGAGAATGTCTC  
CACAGAAGAGCTGATCAATGCCAGGCCAAGAGCAAGGAGCTGGTGGATG  
AGGCCATCCGCTGTAAGCTGAAGATCTTGCAGAATGATGGTGTGGTTAAC  
AGCCCCGTGTGCTCGACCGAGAAAAACCAGCCATGCCCTCTTTCTGCTGGG  
AGGCCAGACCTTCATGTGTGACAAGCTGTATCTGGTGGATCAGAAGGCCA  
AAGAGATCATCCCCAAGGCTGACATCCCCAGCCCCAGGAAGGAGTTCAGC  
GCCTGCGCCATCGGCTGTAAGGTCTACATCACAGGTGGGA--GAGGCTC-  
AGAGAATGGTGTGTCCAAAGATGTGTGGGTCTATGACACCGTCCATGAGG  
AATGGTCCAAGGCAGCACCCATGCTCATTGCCAGGTTTGGTCATGGCTCT  
GCTGAGCTGAAACACTGCCTCTATGTGGTAGGAGGTCACACAGCAGCAAC  
TGGCTGTCTCCAGCCTCTCCCTCCGGATGAATACATTTGTCGTGTTTCA  
CGTTCAACAACAAGGCTAATTCTGAACGAAGCGGAACATAATCATGGCGCT  
GGCCAGGAATTTTCCAGATGAGAGTGGTTACAGTATCCCTGGAGGAACAAA  
CTTTTCGCCAGCATCGTCCAGGTGATCAGCAGGGCCTCCATGTTAGTCAGT  
ATGCATGGAGCTCAGCTTGTACCTCACTCTTCCCTCCCCAGAGGAGCTGC  
TGTGGTGGAGCTGTTCCCTATGCTGTGAACCCAGAACAGTACACCCCAT  
ATAAAAACCTCGCCTCCCTACCAGGCATGGACCTTCAATATGTTTCCTGG  
AGGAACACTATGGAGGAGAACACCATCACCCACCCAGACCGACCTGGGA  
ACAAGGAGGTATCTCCATTTGGAAAAGGATGAGCAAGAGCGAATACTGG  
CGAGCAAGGATGTCCCCAGGCACCTGTGCTGCCCGACCCAGAGTGGCTC  
TTCCGAATCTATCAGGACACTTTGGTGGACATCCCTTCATTCTTGGAAGT  
CCTCAA---AGAGGGCCTGAGG---GCTAGGCCAGCTTGAGGAA---GG  
CCAAGCCAGCCAGCACGGTTCATCCAGGCCGGGTAAGAGAACCCAGTGC  
CATACTCAGTCCAAGCCACCAACGAGGCTAAACTCACGGTTTCTGGCA  
GATCCCCTGGAATCTGAAATACCTGAAGGTGAGAGAAGTGAAGTATGAGG  
TGTGGATCCAGAAGAGGGATAACCAGCAAGGGAACACTGGAGGATCAAATC  
ATCCAGGCAAACCCCTGCACTGGAAGCCTTTGGTAACGCCAAAACAGTGAG  
GAATGACAACCTCATCCCGTTTTGGAAAATTCATCCGAATTCACCTCGGAA  
CCAGTGGCAAGCTGGCGTCTGCTGACATTGAGACTTACCTGCTAGAGAAG  
TCGCGTGTACCTTCAGCTCAAGTCTGAGAGGAACTACCACATCTTCTT  
CCAGATCTTGTCCAATCAGAAGCCAGAGCTGCTGGACATGCTGTTGATTA  
CCAACAACCCATATGACTACTCCTACATCTCCCAAGGAGAGGTAACAGTA  
CAATCCATCAACGACTCAGAGGAACTGATGGCCACTGACAATGCCTTCAA  
TGTGCTTGGCTTCACTCAAGAGGAGAAGATGGGAGTCTATAAGCTGACCG  
GTGCCATTATGCACTACGGCAACATGAAATTTAAGCAGAAGCAGCGTGAG  
GAGCAGGCTGAGCCTGATGGAACGGAGGCTGCTGATAAGACAGCTTACCT  
AATGGGGCTGAACTCTGCAGACCTTATCAAAGGGCTGTGCCATCCCAGAG  
TCAAAGGTAGGAAATGAATATGTCACCAAAGGCCAAGGTGTAGACCAAGTC  
TACAACCCCAACAAGGAGGCCTTCAAGTGCAGGAGTGTGGCAAGCACTA  
CAACACCAAGCTGGGATACAAGCGCCATGTGGCCATGCACTCTGCCACGG  
CAGGGGACCTTACCTGTAAAGTGTGCATGCAGAGCTATGAGAGCACGCCG  
GTGCTCCTGGAGCACCTCAAGAGCCACTCAGGGAAGTCCTCAGGTGGCAC  
CAAGGAGAAAAACACCCATGCGACCACTGCGACCGTTCGCTTCTACTC  
GGAAGGATGTAAGACGGCACATGGTGGTCCACACGGGCCGAAAGGACTTC  
CTGTGCCAGTACTGTGCCAGCGCTTTGGCAGGAAGGACCACCTGACACG

GCACGTAAAGAAGAGCCACTCGCAGGAGCTGCTGAAGATCAAGACAGAGC  
CTCCGGATATGTTAGGTCTTTTAGGTTCTGGCTCGCCGCCTTGCTCCGTC  
AAGGAGGAGCTTAGCCCCATGATGTGCAGCATGGGTCCCAACAAAGACCC  
CATGATGGGCAAACCGTTCCCCAGCGGAACCCCTTCCCGATGGGCATGT  
ACAACCCCCACCAC-----CTCCAGGCCATGTCCAATTCTGGGGTGGGT  
CACCCC-----CACCCCTCCCTGATGCCTAGTTCCTGTCTGCAGCTAT  
GGGCATGGGCTGTACATGGAATATCTCATCTACGCCTCTTTCTCATTCA  
TGGGATGTTTACAAAATCAGTGATGGGTCAAACATTGTGAACTTGCTGGCT  
AGTAATTCTCCGAGCGTTTCATACGCTCTGACCCAGCAGAAATACTTCAG  
TAACTACAGTCCCGTGATTGGGTTTACATTTACGAGCCCATTGAGTACT  
GGAACTCCACGGTGCAGGAGCATCTGAAGACACTGAGTCATGGCTTCAAC  
AAGATCTCCTGGATGGACAACCTTCTTCCACTACCTGAGGGTGGTGAACGT  
GAGCGCGTCGAACAAGAGCGACTTCATCACCATCCTCAAGGGCTCCTTCC  
TGCGCAGCCCAGAGTACCAGCACTTCACTGAAGACATCATCTTCTCCAAG  
A---ACCGTGAAAGTG-----ATGAGTATGACATTATTGCCTCACGCAT  
GTACCTGGTGGCGCGGACCACGGAGAAAAAGCGGAGGAGGTGGTGGAGC  
TTCTGGAGAAGCTGCGTCCGCTGATGCTGATCAACAGCATCAAATTCATC  
GCCTTCAACCCACCTTTGTTTTTCATGGACCGCTACAGCGCCTCTGTTCAT  
CTCACCCATCCTGACCTCAGGCTTCAGCGTGCTCACCATCCTCATYCTCA  
CTTTTTTCTCCTGGTTCATCAAYCCCTTGGGAACTTCTGGCTCATCCTGATG  
GTTACTTCTGTGGAGCTGGGCGTCTTGGGTTTAAATGGGCTATCACCTATT  
CGAGTGGCAGCCGGCCCTCAAGAATGTGTCTGCATCCTGTCATGTGGCA  
TTATTAATGGGCTCTCTGGATGGACTGCCTCAGTGGATGATTCCCCAGCT  
GACACCATCACTCGCGGATTTTCGCTATGATGTGGCCCTGGTGTGAGCCTT  
AAAGGATCTGGAGGAGGACATCATGGAGGGACTGAGAGAGTGTGGGCTGG  
AAGACAGTGCTTGCACCTCAGGCTTCAGTGTTCATCAAGGAATCTTGT  
GACGGCATGGGAGATGTGAGCGAGAAGCATGGCGGAGGGCCAATGGTCCC  
TGAGAAGGCTGTGCGTTTTCTCTTTTACTATTATGTCTGTCTCTGTCTTGG  
CAGACGGAGAGGAG-----AAGGCG  
GTTACCATCTTCAGGGAGCCAAAGCCCAACTCTGAACTGTCCTGTAAGCC  
CCTATGCCTGATGTTTGTGGATGAGTCAGACCACGAGACACTCACTGCTG  
TCCTGGGGCCTGTAGTTGCAGAGCGTAATGCAATGAAGCAGAGTCGACTC  
ATCCTATCTATGGGTGGCCTGCCTCGCTCCTTCCGCTTCGAATTCAGAGG  
CACAGGATATGATGAGAAGATGGTGCCTGAGATGGAGGGCCTGGAGGCCT  
CAGGTTCACCTACATCTGCACTCTGTGTGACTCCAGTCGGGCAGAGGCC  
TCTCACAACATGGTGTGCACTCCATCACCCGCAGTCACGATGAGAACCT  
GGAGCGTTATGAAATATGGAGGACCAATCCTTTTTCTGAGTCTACCGAGG  
AGCTGCGAGACCGGGTCAAAGGGGTCTCCGCCAAGCCCTTTATGGAGACC  
CATCCACTCTGGATGCATTACACTGTGACATTGGTAATGCCACTGAGTT  
CTACAAAATCTTCCAGGATGAGATTGGGGAGGTGTCCAAAAGGT---CA  
AC---CCCACCCGGGAGGAACGGCGGAGATGGAGGGCAGCCCTAGACAAG  
CAGCTGAGGAAGAAGATGAAGCTTAAACCGGTGATGAGGATGAATGGGAA  
CTTTGCCCGGAGGCTAATGTCCCAGGAGACTGTGGAGGTGGTGTGTGAGC  
TTGTGCCCTCAGAAGAGAGGAGGGAGGCCCTGAGGGAGCTTATGGGGCTC  
TACCTCCAGATGAAGCCTGTGTGGCGCACCACTGCCAGCCAAGGAGTG  
CCCTGACCAGCTGTGCCGCTACAGCTTTAACTCCCAGCGCTTTGCCGATC  
TCCTCTCCACTACCTTCAAATATAGGTACAATGGAAAAATCACCAATTAC  
CTGCACAAGACCCTGGCCCATGTCCCAGAAATCATAGAGAGAGATGGCTC  
CATAGGAGCCTGGGCCAGTGAGGGGAATGAGTCAGCAAACAAATCGTACA  
CCATTGAGATGGGCCCAAGGGGCCCAATGGAAGGAGAGCCCGCAGCCT  
TTCTCCTGCTCCATTGAAGACCCACGAAACAGACCAAGTTCAAGGGCAT  
CAAGACCTACATTTTCGTACCGGGTCACGCCGAGCCACTCAGGGCGTCCCG  
TCTACAGGCGCTACAAACACTTTGACTGGCTGTACAACCGCTTGCTGCAC



CGCGTCTTCCAACGTGGTCAACGGCCAGATGCGACTGGGCTTCTCGGGGG  
 ACATGTACGGTTCGGGCCGATCAGTACGGCCACGTTACGAGCCCGAGGT--  
 -CCGACCACTACGCATCGACCCAGTTGCACGGCTATGGCCCCATGAACAT  
 GAATATGGCCGCG---CACCACGGAGCAGGGGCCCTTCTTTTCGATACATGA  
 GGCAGCCGATCAAGCAAGAGCTCATCTGCAAGTGGATCGAGCCGGAGCAG  
 CTGACGAATCCCAAAAAGTCGTGCAACAAAACCTTTTAGTACGATGCACGA  
 GCTGGTGACCCATCTGACGGTGGAGCATGTGGGGGGGCCGGAGCAGTCCA  
 ACCACATCTGCTTCTGGGAAGACTGCTCCAGAGAAGGGAAACCATTCAAA  
 GCCAAATACAACTTGTGAATCATATCAGAGTACACACCCGGAGAAAAGCC  
 CTTCCCGTGTCCNNNNNNNNNNNNNNNNNNNN

>Bathyclupea gracilis

-----  
 -----  
 -----  
 -----  
 -----  
 -----  
 -----  
 -----  
 -----  
 -----  
 -----  
 -----  
 -----  
 -----  
 -----  
 -----  
 -----  
 -----  
 -----  
 -----  
 -----  
 -----  
 -----  
 -----

-----  
 -----GGATGAATACATTGTTGTGTTTAGT  
 CGTTCAACAACGAGGCTGATACTAAATGAAGCGGAGCTAATCATGGCGCT  
 GGCCAGGAGTTCCAGATGAGAGTGGTCACGGTATCCCTGGAGGAACAGC  
 CTTTCCCCAGTATCGTCCAGGTGATCAGCGGTGCTTCCATGTTAGTCAGT  
 ATGCATGGAGCTCAGCTTATCACCTCACTCTTCCCTCCCCAGAGGAGCTGC  
 TGTGGTGGAGCTGTTCCCCTTTGCTGTGAACCCAGAGCAGTACACCCCGT  
 ATAAAACCCTTGCTCCCTTCCAGGCATGGACCTTCACTATGTCTCCTGG  
 AGGAACACTAAGGAGGAGAACACCATCACCCACCCAGACAGACCCCTGGGA  
 ACAAGGGGGCATTGCTCACTTGGAGAAGGAGGAGCAAGAGCGAATACTGG  
 AGAGCAAAGATGTCCCAGGCACCTGTGCTGCCGCAACCCAGAGTGGCTC





-----  
-----  
-----  
-----  
-----  
-----  
-----  
-----  
-----  
-----  
-----  
-----  
-----  
-----  
-----  
-----  
-----  
-----

-----TCGTACA  
CCATCGACATGGGCTCCTTGAGGCCCGGTGGAAGGAGAGCCACAGCCT  
TTCTCCTGCTCCATTGAAGACCCCACAATACAGACAAAGTTCAAGGCAT  
CAAGACGTACATTTTCGTACCGGGTCACACCGAGCCACACAGGGCGTCCCG  
TCTACAGGCGCTACAAACACTTTGACTGGCTGTACAACCGCTTACTGCAC  
AAGTTCACGTGTGATCTCCGTGCCTCACCTGCCTGAGAAGCAGGCCACGGG  
GCGATTTGAGGAAGACTTCATCGAGAAGCGTAAGAGGCGACTGATACTGT  
GGATGAACCACATGACCAGTCACCCAGTCCTCTCCAGTATGAAGCCTTT  
GAGCACTTTCTGATGTGCGCTGATGACAAGCAGTGGAAGCTGGGCAAGAG  
ACGGGCGGAGAAGGACGAGATGGTGGGTGCCCATTTTCATGCTGACCCTCC  
AGATCCCTAATGAGCACCGAGACCTTTCAGGATGTAGAGGAGCGGGTCGAC  
TCCTTCAAGGCCTTTGCTAAGAAAATGGATGACAGCGTGATGCAGCTCAC  
ACATGTTGCCTCGGAGCTGGTGGTAAAGCACCTGGGTGGGTTCAGGAAGG  
AGTTCCAGCGGCTGGGAAATGCCTTCCAGTCTATCAGCCAGGCCTTCATG  
CTGGACCCTCCACACAGCTCAGAAACCTTCAACAACGCCATCTCCAC--  
-----CTGACCTCTCTGGGTTTCATCATTGGCGTCG  
GTGTGGTTGGAACCTCCTGATCTCCATCCTGCTGGTCAAAGACAAGAGC  
CTGCACCGAGCGCCCTACTATTTCCCTGCTGGACCTGTGCGCCTCTGATAT  
CCTGCGCTCCGCCATCTGCTTCCCCTTTGTCTTTCACCTCGGTCAAGAATG  
GATCTGCCTGGACCTATGGCACGCTGACCTGCAAAGTGATCGCCTTCCCTG  
GGTGTGCTCTCCTGTTCCACACGGCGTTTTATGCTGTTCTGTGTCAGTGT  
CACGCGCTACCTGGCCATCGCACACCACCGTTTTCTACACCAAGAGGCTGA  
CCTTCTGGACCTGTCTAGCTGTCTATCTGCATGGTGTGGACGTTGTCAGTG  
GCCATGGCGTTCCCGCCAGTGCTAGACGTAGGGACGTACTCTTTTATCCG  
AGAGGAGGACCAGTGCACATTCAGCACCAGCTCCTTCAGGGCGAATGATT  
CGCTGGGCTTCATGCTCCTGCTGGCGCTCATCCTCCTGGCCACACAGCTG  
GTTTACCTCAAGCTCATTCTTTCGTCCACGACCGTTCGAAAGATGAAGCC  
TGTCAGTTTCGTGCTGCTGTCAGCCAGAAGTGGACCTTCCACGGGCCAG  
GCGCCAGCGGGCAGGCGGCAGCCAACTGGCTGGCCGATTTGGTTCGAGGC  
CCCACCCCGCCTACTTTGCTGGGCATCCGGCAGAACAGCAACGCAGCGGG  
CCGCAGGCGTCTACTGGTATTGGATGAGTTCAAAACAGAGAAGAGGATTA  
GTAGGATGTTCTACATCATGACGTTTTTCTTCCCTGGCTCTGTGGGGGCC  
TATCTGGTGCCTGTTACTGGCGGGTGTGTTGCAAGGGGCCCTGTGGTCCC

TGGGGGCTACCTGACGGCAGCTGTGTGGATGAGCTTTGCCAGGCTGGGG  
TCAATCCGT-CATCTGC-----GCCAAATCTCGCTTT  
CACCTTGGCATGGGGACTGGTCCTGGCACGGAGC---GCAGCGTCCCACT  
CGGCAACAGCTTGCTATCCCCGCAGCAAACCGAGGAGCCCACTGTTGCCA  
CCCCCCCGCAGCGATGGTTTTGTCACCC---CTGCCAACAACCGACTGGAC  
TTTGCTGCCTCGGCATACGACGCCGCT-----GATTTCCGCCGGTAA  
CGCGGCCACCTTGCTGTCTACGCAGCGGCCGGAGTGAAGGCTC-----  
TTCCCTGCCGACTGCAGGCTGCTCCAACCGGCTCTTGGCTATTACGCA  
GACCCGTGAG---GCTGG---GGAGGACGCACGCCCGCCGAGTACTGTGG  
TGTAATAGCAAATCCAGCTCGGTCTTTTCCTGCTGGCCCCGCTAACTCTA  
TCGGTGGCAGAGCAGGCA---CC---AACTACCTGG-----CGGAG  
GA---GGGA---GACTC---CATCCCGACAGAGAGGTCACCG---AT---  
CGGCGGCTCGGAGGAG---ACCAAACCCAAAGACCTGAC---ATCAGA--  
-GTCGAGCTGGATAGAG---ACGCCGTCCTCCATTAAGTCCATTGATTCA  
AGCGATTCTGGTATCTTTG---AACAGGCCAAAAGGAGAAGAATCTCACC  
TTCTGCCACGCCG-----GTTTCAGAGACAGTGTCCCCGTTGAAAT  
CGGAGCATCACTCAACAGGCCAAGTCACAGAGAGAGAAGTGGCGTTGGGG  
ATAAATCCGTTTCGCGGATGGGATGGGCGCCTTCAAATAAAACACAGCTC  
CCACGATATCGGCTCCGG---ACAAACGGCGTTTTCCTCCAGGCG---C  
CCGGCTAC---GCAGCAGCCGCCCTGGGG---CACCATCA-----CCAC  
CCGACCCACGTTGGCTCT--TACTCCACGGCGGCTTTCAACTCCACCAG  
GGACTTTCCTTTCAGAAATCGGGGTTTCGGGGACGCCACCGG-----  
----GGCGCAGCACAGTTTTGTTCCGCTC-----CGGAAGTTT---C  
-----GCAGGGCCACATGGACACTCAGATGCAGCGGGGCACCTGCTCTT  
CCCGGGGCTCCACGAG---CAAGCGCGAGCCATGCGTCTTCCAACGTGG  
TCAACAGCCAGATGCGGCTGGGCTTCTCGGGGGACATGTACGGACGGGCC  
GACCAGTACGGCCACGTTACAAGCCCGCGGT---CTGACCACTACGCTTC  
GACCCAGCTGCACGGCTATGGCCCCATGAACATGAATATGGCCGCA---C  
ACCACGGAGCTGGGGCCTTCTTTTCGATACATGAGGCAGCCGATCAAACAA  
GAGCTCATCTGCAAGTGGATCGAGCCGGAGCAGCTGACGAATCCCAAAAA  
GTCGTGCAACAAAACTTTTAGCACGATGCACGAGCTGGTGACCCATCTGA  
CGGTGGAGCATGTAGGGGGACCGGAGCAGACCAACCACATCTGCTTCTGG  
GAGGACTGCGCCAGAGAAGGAAAGCCATTCAAAGCCAAATACAAACTTGT  
AAATCATATCAGAGTACACACCGGAGAGAAGCCCTTCCATGTCCGTTCC  
CCGGCTGTGGCAAG

>Bathylaco nigricans

AGCCTCCTAATTTCGAGCCGAACCTAAGCCAGCCCCGGGGCCCTTCTAGGCGA  
CGACCAAATTTATAACGTCATCGTACAGCACACGCATTCGTAATAATCT  
TCTTTATAGTAATAACCCATCATGATCGGGGGCTTTGGAAACTGGCTGCTC  
CCCCAATACTGGGGGCCCCGATATAGCATTCCCCCGAATAAAATAACAT  
AAGCTTCTGGCTTCTTCCCCCTCACTTCTCCTCCTGTCGTCTCAG  
GAGTTGAAGCCGGGGCAGGAACAGGCTGAAGTGTCTACCCCCCATTAGCC  
GGTAACCTGGCCCACGCCGGCGCTCCGTAGATCTCGCTATCTTCTCCCT  
CCACCTAGCAGGCGTATCCTCAATCCTGGGCTCAATTAATTTTATTACTA  
CAATCACCACATGAAACCCCCAGCCATCTCCCAGTACCAAACACCTCTG  
TTTGTGTGATCTCTGCTCGTCACAACGTCTCCTGCTTCTCCTGTCACTTCC  
AGTCTGGCCGAGCTATTACCATACTCCTCACAGATCGTAACCTCAACA  
CAACATTCCTTTGACCCAGCCGGAGGAGGGGACCCCATCCTGTACCAACAC  
CTATTCTGATTCTTTGGCCACCCAGAAGTCTACATCTTAATCTTACCCGG  
ATTTGGCATGATCTCACATGTGCTCGCCTACTACGCCGGTAAAAAGAGC  
CGTTCGGCTACATAGGCATGGTCTGAGCCATGATGGCTATCGGGCTCCTG  
GGGTTTATTGTCTGAGCCACCACATGTTTACAGTCGGGATAGACGTAGA  
CACTCGTGCCTA-----





TTTGAGCACTTCTTCATGTGCGGTGATGATAAACAGTGGAAAGCTGGGCAA  
GCGGAGGGCGGAGAAGGATGAGATGGTGGGGGCCACTTCATGCTCACCT  
TCCAGATCCCCAACGAGCACCAGGACCTGCAGGATGTGGAGGAGCGGGTG  
GACTCCTTTAAGGCCTTTGCCAAGAARATGGACGACAGCGTCATGCAGTT  
AACACATGTGGCCTCCGAGCTGGTGCGCAAACACCTGGGAGGGTCCGCA  
AAGAGTTCCAAAGGCTGGGGAACCTCCTCCAGTCCATCAGCCAGGCTTTC  
ATGCTGGACCCCCCTACAGCTCTGATGCCCTGAATAATGCCATCTCCCA  
C-----

-----GCCAAATCCCGC  
TTTCACCATGGCGTCGGCACGGGGCCTGGCACGGACC---GCAGCGTCCC  
ACTC---AACAGCTTGCTATCCCCGCAACAAACCGATGAGACCGCAGTGG  
---CCTCCCCGAGCGATGGTTTGTACCC---CTGCCAACAATCGACTG  
GACTTTGCCGCCTCGGCATACGATGCCGCCGCTGCAGCTGATTTTGCCGG  
TAACGCGGCCACCCTTCTGTCTACGCAGCTGCCGGAGTGAAAGCGC---  
---TCCCACTGCCCACTGCAGCCTGCTCCAACAGAGCCCTGGGCTATTAC  
GCGGAGCCGCCAG---GGTGG---GGCACACGCACTCCACCGCAGTACTG  
T-----AGTAAATCAAGCGCGGTTCTTTCATGCTGGCCCGCCAATT  
CCATTGGGAGCAGAACATCCA---CCTCCAATTACCTGG---TTGGCTTG  
GACGA---CGGG---GACGC---TATCGCACCTGAGAGGTCACCT---CT  
---CGGGGTGGCAGACGAA---GCCAAGCCAAAAGACCT-----GTCGG  
A---ATCAAGCTGGATAGAG---ACCCCGTCTTCAATTAAATCAATCGAC  
TCAAGTGATTCTGGGATCTTTG---AACAGGCCAAACGGAGGAGAATTC  
GCCATCTGCTACACCG-----GTTTCAGAGACGTCGTCCCCATTAA  
AATCAGAA-----







-----  
-----  
-----  
-----  
-----  
-----  
-----  
-----  
-----  
-----  
-----  
-----  
-----  
-----  
-----  
-----  
-----  
-----  
-----  
-----  
-----

-----TCCTACA  
CCATCGAGATGGGCACCAAAGGGCCTCAGTGGAAAAGAGAGTCCCCAGCCT  
TTCTCTTGCTCCATCGAAGACCCCACCAAGCAGACCAAGTTTAAAGGCAT  
CAAGACCTACATATCGTACCGGGTGACCCCAGCCACCTGGGGCGGCCCG  
TGTACCGGCGCTACAAGCACTTTGACTGGCTGTACAGTCGCCTGCTGCAC  
AAGTTCACGGTCATCTCCGTGCCCCACCTCCCGGAGAAGCAGGCCACAGG  
GCGCTTCGAGGAGGACTTCATCGAGAAGCGCAAGAGGCGGCTGGTCCTCT  
GGATCAACCACATGACCAGCCACCKGTCCTGTCCAGTACGAGGGGTTTC  
GAGCACTTCCTGATGTGCGCCGACGACAAGCAGTGAAGCTGGGCAAGCG  
GCGGGCGGAGAAAGACGAGATGGTGGGCGCCCACCTTCATGCTCACCTTCC  
AGATCCCCACGGAGCACCAGGACCTGCAGGACGTGGAGGAGCGCGTGGAC  
AACTTCAAGTCCTTCGCCAAGAAGATGGATGACAGTGTTCTGCAGCTGAC  
GCACGTGGCGTCGGAGCTGGTGCAGGAAAGCACGTGGGAGGGTCCGGAAGG  
AGTTCAGCGGCTGGGGAACGCCTTCCAGTCGGTCAGCCAGGCCTTCATG  
CTGGACCCCCCCCACAGCTCGGACGCCCTCAACAATGCCATCTCTCAC--

-----  
-----  
-----  
-----  
-----  
-----  
-----  
-----  
-----  
-----  
-----  
-----  
-----  
-----  
-----  
-----  
-----  
-----  
-----  
-----  
-----

-----GCCAAATCTCGCTTT  
CACCTGGCGTAGGGACTGGTCCTGGCACAGACC--GCAGCGTCCCCT

TAGTAACAGCTTGCTGTCCCCGCAACAAACCGAAGAGCACACAGTTG---  
CTTCCCCGCAGCGATGGTTTTGTCACCC---CTGCCAACAACCGACTGGAC  
TTCGCCCGCTCGGCATACGACGCCCGCGGCTGCTGATTTCCGCCGTAA  
CGCGGCCACCTTGCTGTCTTACGCAGCTGCTGGAGTAAAAGCCC-----  
TTCCCTGCCCCTGCTGGCTGCTCCAACAGACCTTTGGGTTATTATGCC  
GACCCATCCG---GCTGG---GGCGCCCGCACACCGCCTCAGTACTGC--  
-----AGTAAATCCAGCTCGGTGCTTTCGTGCTGGCCCACAAATGCTG  
TTGGAAGCCGAACAGGCA---CGTCCAATTACCTGC-----CGGAA  
GA---CGCG---GACAC---CATCCCCACGGAGAGGTCTCCG---AT---  
CGGAGTGCCAGAGGAG---ACCAAACCAAAGACTT-----GTCCGA--  
-GTCAGCTGGATAGAG---ACGTCGTCTTCAATAAAGTCGATAGATTCA  
AGTGATTCTGGGATCTTTG---AGCAGGCCAAACGGAGAAGAATTTACC  
GTCTGCCACACCG-----GTTTCGGAGACAGTTTCCCCGCTGAAAT  
CAGAG-----

-----CGGCGTTTTCTCCCAAGCT---C  
CGGGCTAC---GCGGCCCGCGCTGGGA---CACCACCA-----CCAC  
CCGACCCATGTAGCTCC---TACTCCACCGCCCTTCAACTCCACCCG  
GGACTTTCTTTTTCGAAATCGGGGCTTCGGAGACGCGACCAG-----  
----CGCCCAACACAGCCTGTTTCGCTCCGC---AGCGGAACTTT---C  
-----GCAGGGCCCCACGGACACTCCGATGCGGGGGACACCTGCTCTT  
CCCGGGACTTACAGAG---CAAGCCGCGGGCCACGCGTCTCCAACGTGG  
TAAACAGTCAGATGCGCTTGGGCTTTTCGGGGGACATGTACGGACGGGC  
GACCAGTACGGCCATGTGACGAGCCCGCGAT---CCGACCACTACGCGTC  
GACCCAGTTGCACGGTTATGGCCCCATGAACATGAATATGGCCGCA---C  
ACCACGGAGCAGGGGCCCTTCTTCCGTTACATGAGGCAGCCGATCAAACAA  
GAGCTCATCTGCAAGTGGGTGAGCCGGAGCAGTTGTGCAACCCGAAAAA  
GTCGTGCAACAAAACCTTTCAGCACGATGCACGAGCTGGTGACCCACCTGA  
CCGTGGAGCATGTGGGGGGACCGGAGCAGTCCAACCATATTTGCTTTTGG  
GAAGAGTGCTGCCGAGAAGGAAAACCTTCAAAGCTAAATACAAACTTGT  
AAATCATATCAGAGTACACACCGGAGAGAAACCTTCCCGTGTCCGTTCC  
CCGG-----

>Bathymaster signatus

AGCCTCCTCATTTCGAGCAGAGCTAAGCCAGCCCCGGCGCCCTCTTAGGAGA  
CGACCAAATTTATAATGTAATTGTTACAGCACATGCATTCGTAATAATTT  
TCTTTATAGTAATAACCAATCATGATCGGAGGTTTCGGAACTGACTTATT  
CCTCTAATGATTGGAGCCCCAGACATGGCATTCCCCGGATAAAATAATAT  
GAGTTTTTGACTTCTTCCCTCCTTTCCTCCTTTCCTTGCCCTTTCAG  
GTGTAGAGGCGGGAGCCGGAACAGGGTGAACAGTTTATCCCCCTCTTGCT  
GGCAATTTAGCCCATGCAGGAGCTTCTGTTGATTTAACAATCTTTCCCT  
TCATTTAGCAGGAATTTCTTCAATCCTAGGGGCAATTAATTTCAATTACAA  
CTATTATTAACATGAAACCCCTGCCATTTCCCAATACCAAACACCCCTT  
TTCGTTTGATCAGTACTCATTACCGCAGTTCTTCTACTTCTTTCTCTTCC  
AGTTCTTGACAGCTGGTATTACCATGCTACTAACAGACCGTAATCTTAACA  
CCACTTCTTTGATCCTGCCGGGGGAGGAGATCCAATTTCTTTACCAACAT  
TTA-----

-----TTCTAGAGAGAAACCTTACCCGTCTAATTGCCCTGG  
CATGCTCTTGCTGTCTGATGCCACCAGTGCACCAAGCTGTCAGAGCTCT  
CCTGGGGCATGTGCCCTCAGCAATTTCCCCGCTATTTGCAAGACAGAAGAC  
TTCTCCAACCTGCCCAAAGATATGGTGGTGCAGCTTTTGTACACGAGGA

GCTAGAGACAGAAGATGAGAACTGGTTTATGAAGCTGCCCTTAACTGGA  
TCAACTATGACCTGGAAAAGAGGCACTGCCACCTTCCAGAGCTCCTGAGG  
ACTGTCCGCCTGGCCCTGTTGCCCGCCATCTTTCTCATGGAGAATGTTTC  
GACAGAAGAGCTGATCAATGCCAGCCCAAGAGCAAGGAGCTGGTGGATG  
AAGCTATCCGATGTAAGCTGAAGATCCTGCAGAATGATGGTGTCTTAAC  
AGTCCGTGTGCCCGACCAAGAAAGACCAGCCATGCCCTATTTCTCTG  
AGGGCAGACGTTTCATGTGTGACAAGTTGTACCTTGTGGACCAGAAAGCCA  
AAGAGATCATCCCCAAGGCTGACATTTCCAGCCCCAGGAAGGAGTTCAGT  
GCCTGCGCCATCGGCTGTAAGGTGTACATCACTGGTGGGA--GAGGCTC-  
AGAGAATGGTGTGTCCAAAGATGTGTGGGTCTACGACACCGTCCAAGAGG  
AATGGTGAAGGCGGCGCCCATGCTCATTGCCAGGTTCCGGCCATGGCTCT  
GCAGAGCTGAAACACTGCCTCTACGTGGTAGGAGGTCACACGGCAGCAAC  
TGGCTGCCTCCAGCTTCTCCGTCTGGAGGATTACGTCTGGTGTTCAGT  
CGCTCAGCGACAAGGCTGATACTGAATGAGGTGGAGCTAATCATGGCGCT  
GGCCAGGAGTTCCAGATGAAAGTGGTACAGTGTCCCTAGAGGAACAGT  
CTTTCCCCAGTATCGTCCAGGTGATCAGCGGCGGTCCGTGTTGGTTCAGT  
ATGCACGGCGCTCAGCTCATTACCTCACTCTTCCCTCCCCAGAGGAGCTGC  
AGTGGTGGAGCTGTTCCCTTTGCTGTGAACCCAGAGCAGTACACCCCGT  
ATAAAACCTCGCCACCCTTCCAGGCATGGACCTTCACTATGTCTCCTGG  
AGGAACACTAAGGAGGAGAACACCATCACCCACCCAGACAGACCCTGGGA  
GCAAGGGGCATCGTTCACCTGGAGAAGGAGGAGCAGGAGCGTATACTGG  
CGAGCAGAGATGTCCCAGGCACCTGTGCTGCCGCAACCCAGAGTGGCTC  
TTCCGGATCTACCAGGACACTTTGGTGGACATCCCTTCCCTTCCCTGAAAC  
CCTTAA---AGAGGGCTTGAAG---ACAAAGCCCAGCGTGAAGAA---GT  
CAAAGCCGGCCAGCACAGTCCACCCGGGCCGGGTCAGACAACCCAGTGT  
CAGACCTCGGTGCAAACCACCAACGAGGCTAAACTCACAGTCTCCTGGCA  
GATCCCCTGGAATCTAAAATACTTGAAGGTGCGAGAGGTGAAGNNNNNNNNN-----  
--AAAAGAGATGCTAGCAAGGGGACGCTGGAGGACCAGATCATCCAGGCC  
AACCCGGCGCTGGAGGCTTTTCGGCAACGCCAAAACGNTGAGAAACGACAAC  
TCGTCTCGCTTTGGAAAATTTCATCCGAATTCACCTCGGCACGAGCGGGAA  
GCTGTCTGTCTGCCGACGTCGAGACTTACCTGCTGGAGAAGTCCCGGTGCA  
CCTTTCAGCTCAAGGCTGAGAGGAACACCACATCTTCTACCAGATCCTG  
TCCAATCAGAAGCCAGAGCTGCTGGACATGCTGATCACCAACAACCC  
CTATGACTACTCCTACATCTCCCAAGGGGAGATAACGGTTCGCTCCATCA  
ACGACTCCGAGGAGCTGCTGGCCACCGACAGTGCCTTCGATGTGCTCGGC  
TTCACTCCGGAAGAGAAGATGGGCGTGTACAAGCTAACCGGTGCCATCAT  
GCACTACGGCAACATGAAGTTCAAACAAAAGCAGCGGAGGAGCAGGCCG  
AGCCGGACGGGACGGAGGCTGCCGATAAAAACCGCATACCTAATGGGGCTA  
AACTCTGCCGACGTCATCAAGGGGCTGTGTATCCAGAGTCAAGGTAGG  
AAATGAATTTGTACCAAAGGACAAAGTGTGGACCAAGTCTACTACCCCA  
ACAAGGAGGCCTTCAAGTGTGAGGAGTGCAGGAAAGCACTACAACACCAAG  
CTGGGATATAAGCGCCATGTGGCCATGCACTCTGCCACGTCAGGAGATCT  
CACCTGCAAAGTGTGCATGCAGAGCTATGAGAGCACACCCGTGCTCTTGG  
AGCACCTCAAGACCCACTCGGGGAAGTCTTCGGGCGGCACCAAGGAGAAA  
AAGCACCCGTGCGACCACTGTGACCGTCGTTTCTACACGCGCAAGGATGT  
GAGACGGCACATGGTGGTCCACACGGGTGAAAGGACTTCCTCTGCCAGT  
ACTGTGCCAGCGCTTCGGCAGGAAGGACCATCTGACACGTCACGTGAAG  
AAGAGCCACTCGCAGGAGCTGCTGAGGATCAAGACGGAGCCTCCGGATAT  
GTTGGGTCTTTTAGCGTCCGGGTACCACCTTGCTCTGTGAAGGAGGAGC  
TCAGCCCCATGATGTGCGGCATGGGTCCCAACAAAAGACCCCATGATGGGC  
AAACCGTTCCCCAGCGGGGCCCTTTTCCGATGGGCATGTACAACCCCA  
CCAT-----CTCCAGGCCATGTCTAATTCTGGGGTGGGTACCCG----  
--CACCCGTCCCTGATGCCAGTCCCCTGTCTGCWGTATGGGCATGGGC



AAGAAGATGGACGACAGCGTGATGCAGCTCACGCACGTCGCCTCGGAGCT  
GGTGCGCAAGCACCTGGGCGGGTTCAGGAAGGAGTTCAGCGGGCTGGGAA  
ATTCTTCCAGTCCATCAGCCAGGCGTTCATGCTGGACCCTCCCCACAGC  
TCGGAGGCCCTCAACAANNNNNNNNNNNN-----

-----  
-----  
-----  
-----  
-----  
-----  
-----  
-----  
-----  
-----  
-----  
-----  
-----  
-----  
-----  
-----  
-----  
-----  
-----  
-----  
-----

----GCCAAATCTCGCTTTCACCCCTGGCGTGGGGACTGGTCCTGGCACGG  
AGC---GCAGCGTCCCACTCGGCAACAGCTTGCTGTCCCCGCAGCAAACC  
GACGAGCCCCTGTTGCCACCCCGCAGCGATGGTTTGTACCC---C  
TGCCAACAACCGACTGGACTTTCGCTGCCTCGGCATACGACGCGCT----  
-----GATTTCCCGGTAACGCGGCCACCTTGCTGTCTACGCAGCGGCC  
GGAGTGAAGGCTC-----TTCCTCGCGACTGCAGGCTGCTCCAACCG  
GCCTCTTGGCTATTACGACAGCCCGTACG---GCTGG---GGAGGACGCA  
CACCGCCGAGTACTGTGGTGTAAACAGCAAATCCAGCTCGGTCTTTTCC  
TGCTGGCCCACTAACTCTATCGGTGGCAGAGCGGGCA---CC---ACTA  
CCTGG-----CCGAGGA---GGGA---GACTC---CATCACGACGG  
AGAGGTCGCCG---AT---CGGCGGCTCGGATGAG---ACCAAACCCAAA  
GACATGAC---ATCCGA---GTCGAGCTGGATAGAG---ACGCGTCCTC  
CATTAAGTCAATTGATTCGAGCGATCTGGTATCTTTG---AACAGGCCA  
AAAGGAGAAGAATCTCACCTTCTGCCACGCCG-----GTTTCAGAG  
ACAGTGTCCCGTTAAAATNNNNNNNNNNNNNNNCAGGCCAAGTCACAGAGAGAGAAGTAGCGTT  
GGGGATCAATCCGTTCGCGGATGGGATGGGCGCCTTCAAATAAAACCACA  
GCTCCACGATATCGGCTCCGG---ACAAACGGCGTTTTCTCCAGGCC  
---CCCGCTAC---GCGGCAGCCGCCCTGGGA---CACCATCA-----  
CCACCCGACCACGTTGGCTCT---TACTCCACGGCGGCTTTCAACTCCA  
CCAGGGACTTTCCTTCAGAAATCGGGTTTTCGGGGACGCCACCG---  
-----GGCTCAGCACAGTTTGTTCGCCTC-----CGGAAGTTT  
---C-----GCAGGGCCACATGGACACTCGGATGCAGCGGGGCACCTGC  
TCTTCCCGGGGCTCCACGAG---CAAGCGGCAGCCATGCGTCTTCCAAC  
GTGGTCAACAGCCAGATGCGGCTGGGCTTCTCGGGGACATGTACGGACG  
GGCCGACAGTACGGCCACGTTACGAGCCACGGT---CCGACCACTACG  
CGTCGACCCAGCTGCACGGCTATGGCCCCATGAACATGAATATGGCCGCG  
---CACCACGGAGCAGGGGCTTCTTTCGATACATGAGGCAGCCGATCAA  
GCAAGAGCTCATCTGCAAGTGGATCGAGCCGGAGCAGCTGACGAATCCCA  
AAAAGTCGTGCAACAAAATTTTATGACAGATGCACGAGCTCGTGACCCAT  
CTGACGGTGGAGCATGTGGGGGGACCAGAGCAGACCAACCACATCTGCTT



CCCGTTTTGGAAAGTTCATCCGAATTCACCTTTGGAACCAGTGGTAAACTG  
TCCTCTGCGGACATTGAGACCTACCTGCTGGAGAAGTCAAGGGTCACCTT  
TCAGCTTAAGTCAGAGAGGAACTATCACATCTTCTTCCAAATCTTGTTCCA  
ATCAAAAAGCCAGATCTGTTGGACATGCTGTTGATCACCAACAACCCTTAT  
GACTACTCCTACATCTCCCAAGGAGAAGTAACCGTACCATCCATCAATGA  
TTCAGAGGAGCTGATAGCCACTGACAGTGCCTTCGATGTGCTTGGCTTCA  
CTCAAGAGGAGAAGATGGGAGTCTACAAGTTGACAGGGGCCATTATGCAC  
TATGGCAACATGAGGTTCAAGCAAAAAGCAGCGCGAGGAACAGGCTGAGTC  
TGACGGTACAGAGGCTGCTGATAAGTCAGCTTATCTAATGGGGCTGAATT  
CAGCAGACCTAATCAAAGGTCTCTGCCATCCCAGAGTCAAGGTAGGAAAT  
GAGTATGTACTAAAGGCCAGGGTGTAGATCAAGTCTACTACCCCAACAA  
GGAGGCCTTCAAGTGTGAAGAGTGTGGCAAGCACTACAACACCAAGCTGG  
GATACAAGCGCCATGTGGCCATGCACTCTGCCACGGCAGGGGACCTCACC  
TGCAAGGTGTGCATGCAGAGTTATGAAAGCACACCGGTGCTCCTGGAACA  
CCTCAAGAGCCACTCGGGGAAGTCTCGGGTGGCGCCAAGGAGAAGAAAC  
ACCCGTGCGACCACTGCGACCGTCGTTCTACACGCGGAAGGATGTCAGG  
CGGCACATGGTTGTCCACACGGGCCGAAAGGACTTCCTGTGCCAGTACTG  
TGCCAGCGCTTCGGCAGGAAGGATCATCTGACACGGCACGTGAAAAAGA  
GCCACTCGCAGGAGCTGCTGAAGATTAAGACGGAGCCTCCGGATATGTTG  
GGTCTCCTGGGCTCTGGCTCACCGCCTTGCTCTGTCAAGGAGGAGCTTAG  
CCCCATGATGTGCAGCATGGGTCCCAATAAAGACCCCATGATGGGCAAAC  
CCTTCCCCAGCGGGACCCCTTCCCCATGGGCATGTACAACCCCCACCAC  
-----CTCCAGGCCATGTCAAATCCCGGCGTGGGTCAACCC-----CA  
CCCCCTCTCTGATGCCGGTTCCCTGTCTGCAGCTATGGGCATGGGCTGTC  
ATATGGAATATCTCATCTACGCCTCCTTCTCCTTCATGGGATGTTTACAA  
ATCAGCGACGGGTGGAACATTGTGAATTTGTTGGCCAGTAACTCTCCGAG  
CGTCTCGTACGCCCTGACGCAGCAGAAGTACTTCAGTAACTATAGCCCTG  
TGATCGGGTTTTTATATCTACGAGCCCATAGAGTACTGGAACTCCACGGTG  
CAGGAGCACCTGAGGACACTGAGCCACGGCTTCAACAAGATCTCCTGGAT  
GGACAATTTCTACCACTACCTGCGGGTGGTGAACGTGAGCGCGTCGACCA  
AGGCCGACTTCATCGCCGTCTCAAGGGCTCCTTCTGCGGAGCCCGGCG  
TACCAGCACTTCACCGAGGACATCATCTTCTCCAAGA---GCCGGGACAA  
CG-----ACGAGTACGACATCATCGCCTCGCGCATGTACCTGGTGGCGC  
CCACCACCGAGACGCGCGGACGATGTGGTGGAGCTGCTGGAGAAGTTG  
CGGCCGCTCATGTGATCAACAGCATCAAGTTCATCGCCTTCAACCCAC  
CTTCGTCTTCATGGACCGCTACAGCTCCTCGGTCACTCGCCTATCCTCA  
CCTCTGGCTTCAGCGTGCACCATCCTCATCCTCACCTTCTTCTGGTC  
ATAAACCCGCTGGGTAACCTGTGGCTCATCCTGACGGTCACGTCCGTGGA  
GCTGGGCGTGTGGGTCGANN-----  
-----  
-----  
-----  
-----  
-----  
-----  
-----GAGAAGCACGGTGGAGGGCCAGCGATGCCTGAGAAGGCTGTGCCT  
TTCTCTATACCGTCATGTCTGTCTCTGTCCAGGCTACGGAGAGGAG--  
-----GAGGCGGTGTTCATCTTCAGGG  
AGCCAAAACCAACTCTGAGCTGTCCGTGAAGCCCCGTGCCTGATGTTT  
GTGGATGAGTCTGACCACGAGACACTACTGCTGTCCCTGGGGCCTTTGGT  
AGCAGAGAGGAATGCGATGAAGCAGAGCCGACTCATCCTTTCAGTTGGTG  
GCCTCCCCGCTCTTCCGCTTCCACTTCAGAGGCACAGGCTATGATGAG  
AAGATGGTGCAGAGATGGAAGGGCTGGAGGCTCAGGCTCCACCTATAT  
CTGCACTCTTTGTGACTCCACTCGGGCAGAAGCCTCTCACAACATGGTGC

TCCACTCTGTACCCGCAGCCATGATGAGAACCTGGAGCGCTACGAGATA  
TGGAGGACCAACCCCTTCTCAGAGTCTGCCATGGAGTTGCGAGACCGGGT  
CAAGGGGGTCTCTGCCAAACCATTTATGGAGACCCACCCGACTCTGGATG  
CATTACACTGTGACATAGGTAACGCCACTGAATTCTACAAAATCTTCCAG  
GATGAGATTGGGGAGGTGTTCCGGAAGGC---CAAC---CCTAGCCGGGA  
GGAACGGCGCAGCTGGAGGGCAGCTCTCGATAAGCAGTTGAGGAAGAAGA  
TGAAGCTGAGACCAGTGATGCGGATGAATGGGAACTTTGGCCGAAGGCTG  
ATGACCCAGGAGGCTGTGGAAGTGGTGTGTGAACTGATTCCCACAGAAGA  
GAGGCGGGAGGCCCTGAGGGAGCTGATGGGGCTCTATGTCCAGATGAAGC  
CTGTGTGGCGTGCTACCTGCCAGCCAAGGAGTGCCCTGACCAGCTGTGC  
CGCTACAGCTTTAACTCTCAGCGCTTTGCTGATCTCCTCTCCTCCAACTT  
TAAATACAGGTATGATGGAAAGATCACCAACTACCTGCACAAGACCCTGG  
CCCATGTCCTTGAATTTATAGAGAGAGATGGCTCCATTGGAGCCTGGGCC  
AGCGAGG-----TCATACACCATCGAGATGGGCC  
CAAAGGGCCCAATGGAAAGAGAATCCTCAGCCTTTCTCTTGCTCCATTG  
AAGACCCACAAAAACAGACCAAGTTCAAGGGTATCAAGACGTACATATCC  
TACCGGGTCACCCCTAGCCACATTTGGGCGACCCGTTACAGACGCTACAA  
ACACTTTGACTGGCTGTATAATCGCCTGCTGCACAAGTTCACTGTGATTT  
CTGTGCCTCACCTGCCCAGAGAGCAGGCCACGGGGCGCTTTGAGGAGGAC  
TTCATTGAGAAGCGCAAAAGACGACTGGTCCTCTGGATGAACCACATGAC  
GAGTCACCCGGTCTCTCCAGTATGAGGGGTTGAGCACTTCCCTCATGT  
GCGTCGACGACAAGCAGTGAAGCTGGGTAAGAGGCGGGCTGAGAAGGAC  
GAAATGGTGGGAGCCCATTTCATGCTGACGTTCCAGATCCCCAACGAGCA  
CCAGGACCTGCAGGACGTCGAGGAGCGGTCGACACCTTCAAGTCCTTCG  
CCAAGAAAATGGACGACAGTGTCTATGCAGCTCACGCACGTGGCCTCGGAA  
CTGGTGCICAARCACCTGGGAGGATTCAGGAAGGAGTTCCAGCGGCTTGG  
GAAYGCCTTCCAGTCCATCAGTCAGGCGTTTCATGCTGGACCCTCCCCACA  
GCTCAGAAGCCCTCAACAACGCCNNNNNNNNN-----

-----  
-----  
-----  
-----  
-----  
-----  
-----  
-----  
-----  
-----  
-----  
-----  
-----  
-----  
-----  
-----  
-----

-----GCCAAGTCTCGCTTTCACCCTGGCGTAGGGACTGGTCCTG  
GCACGGACC---GCAGCGTCCCCTCAGCAACAGCTTGCTATCCCCGCAA  
CAAACCGAAGAGCCCACAGTAG---CTTCCCCACAGCGATGGTTTGTCAC  
CC---CTGCCAACAACCGACTGGACTTTGCAGCCTCGGCATACGATGCCG  
CT-----GATTTCCGCGGTAACGCAGCCACCTTGCTGTCTACGCA  
GCGGCTGGAGTGAAGGCAC-----TGCCCTGCCACTGCAGGTTGCTC



CAACAGGCCTCTTGGGTATTACGCAGACCCATCAG---GCTGG---GGCG  
CACGCACATCACCACAGTACTGTAGT-----AGTAAATCCAGCTCAGTC  
CTTTCTTGCTGGCCACTAATTCTGTTGGTGGCAGANNNNNNN---NNNNNNNNNNNN-----  
-NNNNNN---NNNN---NNNN---NNNNNNNNNNNNNNNNNNNNNN---NN---  
NNNNNNNNNNNNNNNNNN---NNNNNNNNNNNNNNNNNN---NNNNNN---NNNNNNNNNNNNNNNN---  
NNNNNNNNNNNNNNNNNNNNNNNNNNNNNNNNNNNNNNNNNNNNNNNNNN---  
NNNNNNNNNNNNNNNNNNNNNNNNNNNNNNNNNNNNNNNNNNNNNNNNNN---  
NNNNNNNNNNNNNNNNNNNNNNNNNNNNNNNNNNNNNNNNNNNNNNNNNN---  
--ACAGGGGAAGTCACAGAGAGAGAAGTGGCTTTGGGGATMAATCCGTTC  
GCAGACGGGATGGGCGCCTTCAAAATCAACCACGGCTCTCATGACATCGG  
CTCCGG---GCAGACGGCGTTTTCTCCAGGCG---CCCGGTTAC---G  
CAGCGGCCCGCCTTGA---CACCACCA-----CCACCCGACCCACGTC  
AGCTCT---TATTCCACGGCGGCTTTCAACTCCACCCGGGACTTTCTCTT  
CAGAAATCGGGGCTTCGGAGACGCCACCGG-----CGCGCAGC  
ACAGTTTGTTTCGCTCTGC---CGCGGGGAGTTT---C-----GCAGGG  
CCGCACGGACACTCGGATGCCGCCGACACCTGCTCTTCCCGGGGCTCCA  
TGAG---CAAGCTGCGAGCCACGCGTCTAACGTGGTAAACAGCCAGA  
TGCGACTGGGCTTTTCTGGGGACATGTACGGGCGGGCCGACCAGTACGGC  
CACGTCACAAGCCCGAGGT--CCGAACACTACGCGTACCCAACTGCA  
CGGCTATGGCCCCATGAACATGAACATGGCCGCT---CACCACGGCGCAG  
GGGCTTCTTTTCGCTACATGAGGCAGCCGATCAAACARGAGCTCATCTGC  
AAGTGGATCGAACCGGAGCAGCTGACGAATCCTAAAAAGTCGTGCAACAA  
AACTTTTAGCACCATGCACGAGCTCGTGACCCATCTGACGGTGGAGCACG  
TGGGGGGTCCGGAGCAGTCGAACCACATCTGCTTCTGGGAGGACTGGCCC  
C-----  
-----  
--

>Bathysaurus ferox

AGTCTTCTCATTTCGAGCAGAAGTCTAGTCAGCCGGGGGCCCTCTTAGGCGA  
CGACCAAATTTATAATGTTATCGTTACCGCACATGCTTTCGTTATAATTT  
TCTTTATAGTAATACCAATTATGATCGGCGGGTTCGAAACTGGCTGGTC  
CCCCAATGATCGGGGCCCTGATATGGCCTTCCCCGAATGAATAATAT  
GAGTTCTGACTTTTACCCCCCTCCTTCCTTCTCCTGCTGTCTTCTCCG  
GGGTAGAGGCTGGAGCTGGGACAGGTTGAACAGTTTATCCGCCCTTGCC  
AGCAACTTAGCACATGCCGGGCCCTCTGTAGACTTGACTATTTTTTCACT  
TCACTTAGCAGGGGTGTCCTCAATTCTTGGGGCCATTAACCTTCACTACTA  
CTATTATTAACATAAAACCCCGCCATCTCTCAGTATCAAACCCCTTA  
TTTGTCTGATCCGTCCTTATTACAGCTGTTCTGCTACTACTATCCCTCCC  
TGTCCTCGCAGCAGGTATTACTATACTTCTGACAGATCGAAACCTAAACA  
CAACCTTTTTTGACCCGGCAGGAGGTGGGGATCCAATTCTGTACCAGCAC  
CTATTCTGATTCTTCGGGCACCCAGAGGTATATATTTCTTATCCTCCCCG  
GTTTGAATAAATTTACACATTGTTGCCTACTATTCAGGTAATAAGGAAC  
CCTTTGGCTATATGGGTATGGTTTGGGCTATGATGGCAATTGGCCTTCTT  
GGCTTTATTGTCTGAGCCCACCATGTTTACCGTCGGAATAGATGTGGA  
CACCCGAGCCTATTTCTTGAGAGGAACCTGCACCCATCCAACCTGCTTGG  
CATGCTGCTACTGTGATGCTCAGCAACTTCCCTGCCATTTGCAAGACGGAGGAC  
TTCCTCCAGCTGCCCAAAGACATGGTGGTGCAGCTTCTGTCCCATGAGGA  
GCTGGAGACAGAAGATGAGAGACTGGTTTACGACGCTGCCCTTAACGGG  
TCAACTACGACCTGGAGAGGAGACACTGCCACCTGTCAGAGCTGCTGAGA  
ACCGTGCGCCTGGCCTTGCTTCCCAGCATCTTCTCATGGAGAACGTCTC  
CACAGAGGAGCTGATCAATGCCAAGCAAAGAGCAAGGAGTTGGTGGACG  
AGGCGATCCGCTGCAAGCTGAAGATCCTGCAGAATGACGGTGTGGTCAAC

AGTCCCTGTGCCCCGCCAGAAAGACCAGCCATGCCCTCTTCCCTGCTGGG  
AGGGCAGACCTTCATGTGTGACAAGCTCTACTTGGTGGATCAGAAGGCCA  
AGGAGATCATCCCCAAGGCGGACATCCCCAGCCCCAGGAAGGAGTTCAGT  
GCCTGTGCCATCGGCTGTAAGGTCTACGTCACGGGCGGGA--GAGGCTC-  
AGAGAATGGCGTGTCTAAAGATGTGTGGGTCTATGACACCATCCATGAGG  
AGTGGTCTAAGGCAGCACCCATGCTCATTGCCAGGTTTGGCCATGGCTCT  
GCTGAGCTCAAACACTGCCTCTATGTGGTTGGAGGACACACAGCAGCCAC  
TGGCTGCCTCCCAGCCTCTCCGTCTGGATGAGTACATTGTGGTGTTCAGT  
CGTTCTACAACAAGGCTGATTCTAAACGAAGCAGAGCTGATCCTGGCACT  
GGCCAAGAGTTTCAGATGAGGGTGGTTACAGTGTCCCTGGAGGAGCAGT  
CTTTCCCCAGCATCGTCCAGGTGATCAGCGGGGCTCCATGTTGGTTAGT  
ATGCACGGAGCTCAGCTCGTACCTCACTCTTCCCTCCCTAGAGGAGCTGC  
TGTAGTGGAGCTCTTCCCCTATGCTGTGAATCCAGAACAGTACACCCCAT  
ACAAAACCTCTAGCCTCCTTACCAGGCATGGACCTTCAATATGTTTCCCTGG  
AGGAACACTATTGAGGAGAACACTATTGCCACCCAGATAGACCTTGGGA  
CCAAGGAGGCATTGCCATTTGGAGAAAAGAAGAGCAGGACAGAATCCTAG  
CCAGCAAGGATGTCCCAGGCACCTATGCTGCCGCAACCCAGAGTGGCTC  
TTCAGGATCTACCAGGACACTCTGGTGGACATCCCCCTCGTTCCCTGGAAGT  
CCTCAA--GGAGGGTCTGAAG---ACAAGGCCGAGCTTGAAGAA--GT  
CCAAGCCGGCCAGCACGGTTTCATCCGGGCGGGTCCGAGAACCCAGTGC  
CAGACATCAGTCCAAGCCACCAACGAGGCTAAGCTCACGGTATCCTGGCA  
GATCCCCTGGAACCTTAAGTACCT-AATGTGCGGGA-GTGAAGTACGAGG  
TGTGGATCACA AAAAGAGATAACAAGCAAGGGAACCCCTGGAGGATCAAATC  
ATTCAGGCAAACCCCTGCGCTGGAGGCTTTTGGTAATGCCAAAACATCGAG  
GAACGATAAATCCTCCCCTTTTGGAAAATTCATCCGAATTCACTTTGGAA  
CCAGCGGTAAACTGTCTCTGCGGACATTGAGACCTACCTGCTGGAGAAG  
TCCCCTGGTACCTTTTTCAGCTCAAGTCAGAGAGGAACTACCACATCTTCTT  
CCAGATCTTGTCCAATCAAAGCCAGAGCTGTTGGACATGCTGTTGATCA  
CCAACAACCCCTTATGACTACTCCTTCATCTCCAAGGAGAAGTAACCGTA  
CCATCCATCAATGATTTCAGAGGAGCTGATGGCCACTGACAGTGCCTTTGA  
CGTGCTTGGCTTCACTCAAGAGGAGAAGATGGGAATCTACAAGTTGATTG  
GGGCCATTATGCACTATGGCAACATGAGGTTCAAGCTAAAGCAGCGAGAG  
GAACAGGCTGAGCCTGATGGTACAGAGGCTGCTGATAAGTCAGCTTATCT  
CATGGGGCTGAATTCAGCAGACCTCATCAAAGGACTCTGCCATCCCAGAG  
TCAAGGTAGGAAATGAGTATGTACCAAAGGCCAGAGTGTAGATCAAGTC  
TACTACCCCAACAAGGAGGCCTTCAAGTGTGAAGAGTGTGGGAAGCACTA  
CAATACCAAGCTGGGATAACAAGCGCCATGTGGCCATGCACTCTGCCACCG  
CCGGGGATTTACCTGTAAAGTGTGCCTGCAGAGTTACGAAAGCACCCCG  
GTGCTCCTGGAACACCTCAAGAGCCACTCTGGGAAGTCCCTCGGGTGGCAC  
CAAAGAGAAAAAGCACCCCTTGCAGCCACTGCGACCCGTCGTTTCTACTC  
GGAAAGATGTCAGGCGGCACATGGTTGTCCACACAGGCCGAAAGGACTTC  
CTGTGCCAGTACTGTGCCAGCGCTTTGGCAGAAAGGATCATCTGACACG  
GCATGTGAAAAAAAACCCCTCCCAAGAACTGCTGAAGAATAAGAACGAGC  
CTCCGGATATGTTGGGCTTCCCTGGGATCTGGGTGCGCCGCTTGTCTGTC  
AAGGAAGAGCTTAGCCCCATGATGTGTGGTATGGGTCCCAATAAAGACCC  
CATGATGGGCAAATCCTTCCCCAGTGGGACCCCTTCCCATGAGCATGT  
ACAACCCCAACCAT-----CTCCAGGCCATGTCTAATTCTGGGGTGGCT  
CACCCC-----CACCCCTCCCTGATGCCAGTTCCCTGTCTGCAGCTAT  
GGGCATGGGCTGCCACATGGAATATCTCATCTATGCTTCCCTTCTCCTTCA  
TGGGATGTTTACAAAATCAGCGACGGGTGCAACATCGTGAATTTGCTGGCC  
AGTAACTCTCCGAGCGTCTCGTACGCCCTGACACAGCAGAAGTACTTCAG  
TAACTACAGCCCCGTGATCGGGTTTACATCTACGAGCCCATTGAGTACT  
GGAACCTCACGGTGCAGGAGCACCTGAAGACGCTGAGCCACGGCTTCAAC





NNNNNNNNNNNNNNNNNNNNNNNNNNNNNNNNNNNNNNNNNNNNNNNNNNNNNNNNNNNNNNNNNNNNNNNNNNNNNNNNNNNN  
NNNNNNNNNNNNATGCTTTCGTGATAATCTTTTTTATAGTAATGCCGGTTATGATCGGCGGG  
TTCGGAAGACTGACTTATCCCCCTAATGATCGGGGCCCTGACATAGCCTT  
CCCCGAATAAATAATATAAGCTTCTGACTCCTCCTCCTCCTCCTCCT  
TCCTCCTGGCCTCCTCTGCAGTAGAAGCGGGTGCCGGCACAGGATGAACA  
GTATATCCACCTCTCGCTAGTAACCTTGACATGCGGAGCCTCCGTTGA  
CTTAACTATTTTTTCACTCCACCTGGCAGGAATCTCCTCTATCTTAGGTG  
CTATTAATTTTATTACAACCTATTATTAACATAAAAACCCCTGCCATTACC  
CAGTATCAAACCCCTATTTGTATGAGCTGTTCTGATTACTGCCGTACT  
TCTCTACTATCCCTACCTGTCTTAGCGGCCGGCATTACAATGTTACTGA  
CAGACCAGAAATTTAAATAACAACCTTCTTCGACCCCTGCAGGAGGAGGTGAC  
CCAATCCTCTACCAACATCTATTTCTGATTCTTTGGTCACCCAGAAGTTTA  
TATTCTCATCCTTCCCGGCTTTGGGATAATCTCCACATTGTTGCCATT  
ATTAGGAAAAGAACCTTTCGGCTACATGGGCATGGTATGAGCCATG  
ATAGCAATCGGCCCTTCTCGGGTTTTATTGTCTGAGCCACCATATGTTTAC  
AGTCGGGATAGACGTAGACACACGTGNNNNNTTCTCGAGAGGAACCTGCACCCA  
TCCAACCTGCCTGGCATGCTGGTACTGTGATGCCCACCAGTGACCAA  
GCTGTTAGAGCTGTCCTGGGGTATGTGTCTTAGCAACTTCCCTGCCATCT  
GCAAGACAGAGGACTTCTCCAGCTTCCCAAAGACATGGTGGTGCAGCTC  
CTGTCCCATGAAGAGCTGGAGACGGAAGATGAGAGACTGGTTTATGAGGC  
TGCCCTTAACTGGGTCAACTATGACCTGGAGAGGAGACTGCCACCTGC  
CAGAGCTGCTGAGAACCGTACGCCGGCCTGCTTCCCGCCATCTTCCTC  
ATGGAGAACGTCTCCACAGAGGAGCTGATCAATGCCAGGCAAAGAGCAA  
GGAGTTGGTGGACGAGGCCATCCGCTGCAAGCTGAAGATCCTGCAGAATG  
ACGGTGTGGTCAACAGTCCCTGTGCCCGGCCAGAAAGACCAGCCAGCC  
CTTTTCTGCTGGGAGGCCAGACCTTTCATGTGTGACAAGCTGTACTTGGT  
GGACCAGAAGGCCAAAGAGATCATCCCCAAGACGGACATCCCCAGCCCCA  
GGAAGGAGTTCAGCGCCTGTGCCATTGGCTGTAAGGCTACGTACAGGC  
GGGA--GAGGCTC-AGAGAACGGCGTATCTAAAGACGTGTGGGTCTATGA  
CACCGTCCATGAGGAGTGGTCCAAGGCAGCACCCATGCTCATTGCCAGGT  
TTGGCCATGGCTCTGCTGAGCTCAAACACTGCCCTTATGTGGTTGGAGGA  
CACACAGCAGCCACTGGCTGCCTCCCAGCCTCTCCATCTGGATGAGTACA  
TTGTAGTGTTCAGTCGTTCCACGACGAGGCTCATTTCTGAACGAAGCAGAG  
CTGATACTGGCACTGGCCAAAGAGTTTCAGATGAGGGTGGTCCAGTCTC  
CCTGGAGGAACAGTCTTTCCCAGCATCGTACAGGTCCATCAGTGGAGCCT  
CCATGTTGGTTCAGTATGCACGGAGCTCAGCTCGTCCCTACTCTTCCTC  
CCTAGAGGAGCTGCTGTGGTAGAGCTTTCCTTACGCTGTGAACCCGGA  
ACAGTACAGCCCATAAAAACCCTAGCCTCCCTACCAGGCATGGACCTTC  
AATATGTTTCTGAGGAACACTGTTGAGGAGAACACTGTCACCCACCCA  
GACAGACCCTGGGACCAAGGAGGCATTTGCCATTTGGAGAAAGAGGCA  
GGAGAGAATCCTAGCCAGCAAGGATGTCCCAGGCACCTATGCTGCCGCA  
ACCCAGAGTGGCTCTTTCAGGATCTACCAGGACACTCTGGTAGACATCCCC  
TCCTTCTTGAAACCTCAA---GGAGGGCCTAAAG---ACGAGGCCGAG  
CTTGAAGAA---GTCCAAGCCGGCCAGCACGGTTCCACCCAGGCCGGGTCA  
GAGAACCCAGTGGCAGACTTCCGGTCCAAGCCACCAACGAGGCTAAACTC  
ACAGTATCCTGGCAGATCTCGTGCACCTTAAGTACCTGACG-----  
-----AAAAGGATACAAGCAAGGGAACCC  
TGGAGGATCAAATCATTCAGGCAAACCTGCACTGGAGGCTTTTGGCAAT  
GCCAAAACATTGAGGAACGATAATTCCTCCCGTTTTGGAAAATTCATCCG  
AATCCACTTTGGAAACAGTGGTAAACTGTCTCTGCGGACGTTGAGACCT  
ACCTGTGGAGAAAGTCACGGGTCATTTTCAGCTTAAGGCAGAGAGGAAC  
TACCACATCTTTTTCCAGATCTTGTCCAATCAAAGCCAGAGCTGCTGGA  
CATGATGTTGATCACCACCAACCCCTATGACTACTGCTACATCTCCAAG

GAGAAGTAACCGTAGCATCCATCAATGATTTCAGAAGAGCTGATGGCCACT  
GACAGTGCCTTTGATGTGCTTGGCTTCACGCAAGAGGAGAAGATGGGAGT  
CTACAAGTTGATAGGGGCCATTATGCACTATGGCAACATGAGGTCAAGC  
AAAAGCAGCGTGAGGAACAGGCTGAGTCTGATGGTACAGAGGCTGCTGAT  
AAGTCAGCTTATCTAATGGGGCTGAATTCAGCAGACCTAATCAAAGGACT  
CTGCCATCCCAGAGTCAAGGTAGGAAATGAGTATGTCACCAAAGGCCAGG  
GTGTAGATCAAGTCTACTACCCCAACAAGGAGGCCCTCAAGTGTGAAGAG  
TGTGGCAAGCACTACAACACCAAGCTAGGATACAAGCGCCATGTGGCCAT  
GCACTCTGCCACAGCGGGGATCTCACCTGCAAAGTGTGCATGCAGAGTT  
ACGAGAGCACCCCGGTGCTCCTGGAACACCTCAAGAGCCACTCGGGGAAG  
TCCTCGGGTGGCGCAAGGAGAAGAAGCACCCGTGCGACCACTGCGACCG  
TCGCTTCTACACGCGGAAGGATGTCAGGCGGCACATGGTTGTCCACACGG  
GCCGAAAGGACTTCTGTGCCAGTACTGTGCCAGCGCTTCGGCAGGAAG  
GATCATCTGACACGGCACGTGAAAAAGAGCCACTCGCAGGAGCTGCTGAA  
GATTAAGACGGAGCTCCGGATATGTTGGGTCTCCTTGGCTCTGGCTCGC  
CGCCTTGCTCTGTCAAGGAGGAGCTGAGCCCCATGATGTGCAGCATGGGT  
GCCAATAAAGACCCCATGATGGGCAAACCCTTCCCCAGCGGGACCCCTT  
CCCCATGGGCATGTACAACCCCCACCAC-----CTCCAGGCCATGTCTA  
ATCCTGGGGTGGGCCACCCC-----CACCCCTCCCTTATGCCTGGGTCC  
CTGTCTGCAGCTATGGGCATGGGCTGTCAATATGGAATATCTTATCTACGC  
TTCCCTTCTCCTTCATGGGATGTTTACAAATCAACGACGGGTGCAACATCG  
TGAATTTGCTGGCCAGTAACCTCTCCGAGCGCCTCGTACGCCCTGACACAG  
CAGAAGTACTTCAGTAACATAAGCCCCGTGATCGGGTTTTTACATCTACGA  
GCCCCATCGAGTACTGGAACCTCACGGTGCAGGAGCACCTGAAGACGCTGA  
GCCACGGCTTCAACAAGATCTCCTGGGTGGACAATTTTCGTCCACTACCTA  
CGGGCGGTGAACGTGAGCGCGTCTACCAAGGCCGACTTCGTACCGTTCT  
CAAGGGCTCCTTCTGCGGAGCCCGCGTACCAGCACTTCACCGAGGACA  
TCATCTTCTCCAAGA---GCCACGAGAACA-----GCGAGTACGACATC  
ATCGCCTCGCGCATGTACCTGGTGGCGCGCACCCACGAGAAGAGGCGCGA  
GGACGTGGTGGAGCTGCTGGAGAAGCTCCGGCCGCTGATGCTGATCAACA  
GCATCAAGTTCATCGCCTTCAACCCACGTTTCGTCTTCATGGACCGCTAC  
AGCTCCTCGGTTCATCTCGCCATCCTCACCTCGGGCTTCAGCGTGTCTAC  
CATCCTCATCCTCACCTTCTTCTCCTGGTTCATCAACCCGCTGGGGAACTTGT  
GGCTCATCCTGATGGTACGTCACGTCGGTGGAGCTGGGCGTGTGGGTCTGATG  
GGCTACCACACATTTGAGTGGCAGCCAGCCCTCAAGAATGTGTCCCATC  
CTGCCACGTGGGTATCATCAATGGGCTTTCGGGTGGGCCGCTCGGTGG  
ATGACGTCCCCTGCCGACATCATCACCCGTCGGTTTCGCTATGATGTGGCC  
CTTGATCAGCCCTGAAGGACCTAGAGGAGGACATCATGGAAGGACTGAG  
GGAGCGGGGCTGGAAGACAGCGCTTGCACCTCAGGCTTCAGTGTATGA  
TCAAGGAATCCTGTGATGGCATGGGAGATATCAGCGAGAAGCACGGTGA  
GGGCCAGCGATGCCTGAGAAGGCTGTGCGTTTTCTCTATCACCGTCATGTC  
TGTCTCTGTCCAGGCCGACGGAGAGGAG-----  
-----GAGGCGGTTGTTCATCTTCAGGGAGCCAAAGCCCAACTCTGAA  
CTGTCTGTAAAGCCCTGTGCCTGATGTTTGTGGATGAGTCTGACCACGA  
GACACTACTGCTGTCTGGGGCTTTGGTAGCAGAGAGGAATGCGATGA  
AGCAGAGCCGACTCATCCTCTCAGTGGGTGGCCTCCTCCGCTCTTTCCAC  
TTCCACTTCAGAGGCACAGGCTATGACGAGAAGATGGTGCAGAGATGGA  
AGGCTTGGAGGCTCAGGCTCCACCTATATCTGCACTCTTTGTGACTCCA  
CTCGGGCAGACGCTCTCACAACATGGTGTCTCCACTCTGTACGCGCAGC  
CACGATGAGAACCTGGAGCGCTACGAGATATGGAGGACCAACCCCTTCTC  
AGAGTCTGTTCATGGAGCTGCGAGATCGGGTCAAAGGGGTCTCTGCCAAAC  
CATTTATCGAGACCCATCCGACTATGGATGCATTACATTGTGACATAGGT  
AATGCCACTGAATTCACAAAATCTTCCAGGATGAGATTGGGGAGGTGTT







-----  
-----  
-----  
-----GGATGAGTACATCGTAGTCTTCAGT  
CGCTCAACGACGAGACTCATTCTCAACGAAGCAGAACTGATTATGGCACT  
GTCCCAGGAGTTTCAGATGAGGGTGGTCACAGTGTCCCTTGAAGAGCAGT  
CTTTCCCCAGTATAGTCCAGTTTATCAGTGGTGCCTCAATGTTGGTCAGT  
ATGCATGGGGCTCAGCTCGTCACCTCACTCTTCCCTCCCCAGAGGAGCTGT  
GGTGGTGGAGCTCTTCCCTATGCTGTGAACCCAGAACAGTACACCCCTT  
ATAAGACCCTCGCCTCCTTACCGGGGATGGACCTGCAGTATGTTTCCTGG  
AGGAATATGATGGAGGAAAACACCATCACCCACCCAGATAGATCCTGGGA  
CCAAGGAGGCATCGCCCACCTGGAAAAGGACGAGCAAGAGCGAATCCTTG  
CCAGCAAGGATGTCCCAGGCACCTGTGTTGCCACAACCCAGAATGGTTC  
TTCCGAATCTACCAGGACACTCTGGTGGACATCCCCTCATTCTGGAGGT  
TCTCAA---AGATGGCCTGAAGATCACCCAGACCAAGCTTAAAAAA---GG  
CCAAGCCGGCCAGCACAGTGCATCCAGGCCGGGTGAGGGAAGCACAGTGT  
CAAACCTCAGTCCAAGCCACCAACGAAGCTAAACTTACGGTCTCCTGGCA  
GATCCCATGGAACCTTGAATACCTGAAGGTGAGAGAGGTGAAGTACGAGG  
TGTGGATCCAG-----

-----  
-----  
-----  
-----TATCTGATCTACGCTTCATTCTCCTTCA  
TGGGATGTTTACAAATCAGCGATGGGTCAAACATTGTGAACCTGCTGGCG  
AGTAACTCTCCAAGTGTGTCTTTTGCRACACCCAGCAGAAGTACTTCAG  
TAACTACAGCCCTGTATTGGGTCTACATTTATGAACCCATTGAGTACT  
GGAATGCCACGGTGCAGGAGCACCTGAAGACACTGAGTCACGGCTTCAAC  
AAGATCTCCTGGATCGACAACCTTCTCCACTACCTGCGGGTGGTAAACGT  
GAGCGCGTGCACCAAGAACGACTTCATCACCATCCTGAAGGGCTCCTTCC  
TACGCAGCCCGGAGTACCAGCACTTCACAGAGGACATCATCTTCTCCAAG  
A---ACCGCGAGAGCG-----ACGAGTACGACATCATCGCCTCGCGCAT

GTACCTGGTGGCGCGCACCACCGAGAAGAAACGCGAGGAGGTGGTGGAGC  
TGCTGGAGAAGCTGCGTCCGCTGATGCTGATCAACAGCATCAAGTTCATC  
GCCTTCAACCCACCTTTCGTCTTCATGGACCGCTACAGCTCGTCGGTCAT  
ATCGCCATCCTTACCTCAGGCTTCAGCGTGCTCACCATCCTCATCCTCA  
CGTTCTTTCTCGTCATCAACCCACTGGGGAACCTTCTGGCTCATTCTGACG  
GTGACGTCTGTGGAGCTGGGCGTGTGGGTCTGATGGGCTACCACCCTTT  
TGAATGGCAGCCAGCCCTCAAGAGCGTGTCCCCCTCTTGCCATGTGGGCA  
TCATCGACGGGCTCTCTGGCTGGGCCGACTCGGTGGATGACTCACCAGCG  
GACACAATCAGCCGAGGTTTCGCTATGATGTGGCCCTTGTGTCTGCCTT  
GAAGGACCTGGAAGAGGAAGTGATGGAGGGACTGAGAGAATGCGGGCTAG  
ATGACAGCGCGTGCACCTCAGGCTTCAGAGTATTGATCAAGNAGTCTGCG  
ATGGCATGGGAGANGTCAGTGAGAAACATGGCGGGGGGCCGCGGTTCTG  
AGAAAGCGGTCCGTTTCTCTTTACCCTTATGTCCATCTCTGTGATGCCG  
GATGGGAAAACG-----GAGGCGGT  
GACCATCTTACAGAGCGAGAGCCCAACTCCGAACTGTCCTGTAAGCCCA  
TGTGCNTGATGTTTGTGGATGAGTCGGACCACGAGATGCTCACTGCCGTTT  
TGGGGCCCGTGGTTCGACAGAGCGCAGGGCAATCACAGAAAGCCGGCTCATC  
CTGTCCATGGGTGGCCTCCCCCGCTCGTTCGCTTCTACTTCAGAGGCAC  
AGGCTATGATGAGAAGATGGTGCCTGAGATGGAGGGCCTGGAGGCATCAG  
GCTCTGCCTATGTCTGCACTCTGTGCGACTCCACCCGGGCGGAGGCCTCT  
CGCAACATGGTGTCTCCATTCCGTCACCCGACCCAGGCGAGAACCCTGGA  
GCGCTACGAGATATGGCGGAGCAACCCCTTTGCGGAGTCTGTGAGGAGC  
TGCGAGATCGAGTGAAGGGGGTCTCCGCCAAGCCCTTCATGGAAACCCAG  
CCCCTCTGGATGCATTGCACTGTGACATTGGTAACGCCACTGAGTTCTA  
CAAAATATTCCAAGACGAGATCGGGGAGGTGTTCCAGAAAGC---CAAG-  
--CCCAGCCGCGAGGAAAGGCGAGGCTGGAGGGCTGCTCTCGACAAGCAG  
CTGAGGAAAAAACTCAAGCTCAAGCCGGTGTGAGGATGAATGGGAACTA  
CGCTCGGAGACTGATGTCCGAGGAGACCATGGATGTGGTGTGCGAACTGG  
TGCCCTCAGAGGAAAGGCGGGAGGCTCTGAGGGAGCTAATGGGGCTTTAC  
CTCCAGATGAAACCTGTGTGGCGTGCCAGCAACCCAGCCAAAGAATGCC  
TGACCAACTGTGTGCTACAGTTTCAACTCCAGCGCTTTGCGAGATCTCC  
TCTCCACTACCTTCAAATACAGGTATGACGGAAAGATTACCAATTACCTG  
CACAAGACCTTGGCCACGTACCTGAAATAGTAGAAAGAGACGGCTCTAT  
TGGAGCATGGGCCAGCGAGGGGAACGAGTCCGCAAACAATCGTACACCA  
TCGAGATGGGCCCCAAAGGGCCATTGTGGAAGGAGAGCCCGCAGCCCTTC  
ACCTGTTCCATCGAGGACCCCACTAAACAGACCAAGTTCAAGGGCATCAA  
GACGTACATCTCTACCGGTCACGCCGAGCCACACMGGTCATCCTGTGT  
ACAGGCGTACAAGCACTTTGACTGGCTGTACAACCGCTTGTGTCACAAG  
TTCACCGTGATCTCCATCCCACACTTGCCAGAAAAACAGGCAACTGGGCG  
TTTCGAGGAGGACTTCATAGAAAAGCGCAAGAGGCGGTTGATCCTCTGGA  
TAAACCACATGACCAGTACCCTGTCTCTCCCAGTACGAGGGGTTGAA  
CACTTCTGATGTGTGGCGACGACAAGCAATGGAAGCTGGGCAAGCGGCG  
AGCAGAGAAGGATGAAATGATCGGTGCCACTTCATGCTGACCTTCCAGA  
TCCCCAACGAGCACCAGGACCTGCAGGATGTGGAGGAGCGCGTAGACTCC  
TTCAAGGCGTTTGCCAAGAAGATGGATGACAGTGTGATGACAGCTGACTCA  
TGTGGCCTCGGAACTCGTGCAGAACACCTTGGTGGATTCCGTAAGGAGT  
TCCAGCGGCTGGGTAATGCCTTCCAGAACATCAGCCAGGCCTTCATGCTT  
GACCCGCCACATAGCTCGGACGGCCTCAACAACGCCATCTCACAC-----  
-----  
-----  
-----  
-----  
-----

-----  
-----  
-----  
-----  
-----  
-----  
-----  
-----  
-----  
-----  
-----  
-----  
-----  
-----  
-----  
-----  
-----  
-----  
-----  
-----  
-----  
-----  
-----  
-----

-----GCCAAGTCCCGCTTTCAC  
CCTGGCGTGGGGAGCGCTGCTGGCACGGAGC---GCAGCGTCCCACTCAG  
CAACAGCTTGCTCTCTCCGCAACAAACCGAGGATCCCGCCGTCG---CCT  
CCCCGCAGCGATGGTTTGTACCC---CTGCCAACAACCGACTGGACTTC  
GCAGCCTCGGCATACGACGCCGCT-----GATTTGCGCCGGTAACGC  
GGCCACCTTGCTGTCGTACGCCGCGGCCGGAGTGAAGGCTC-----TCC  
CCCTGCCGACCGCGGCCTGCTCCAACAGACCTCTGGGTTATTACGCGGAC  
CCGTCGG---GCTGG---GGCGCGGCACGCCGCCAGTACTGC-----  
---AGCAAGTCGACCTCGGTCTTTCTTGCTGGCCCCGGAACCTCTGTGCG  
GGAGCAGAACGGGCA-----CGAACTACCTAG-----TGGAGGA-  
--CGGGTCGGACGC---CATCCCGACGGAGAGGTCGCCGATTAT---TAA  
TGGCTCGGAGGAG---GTGAAAGCCAAAGACTT-----GTCCGA---GT  
CTAGCTGGATAGAG---ACGCCGCTTTCGATCAAATCGATTGACTCAAGT  
GATTCTGGCATTCTTTG---AGCAAGCAAAGCGGAGACGGATTTTACCAGTC  
TGCCACACCA-----GTTACAGAGACGGTGTCTCCGTTGAAATCTG  
AA-----GCAGGCGAGGTCTCCGAGAGGGAGGTGGCGTTGGGGATC  
AACCCGATCGCGGACGGCATGGGCGCTTCAAAATAAACACGGCTCCCA  
CGACATCGGCTCCGG---ACAGACGGCGTTCCTCGCAGCCGGGCCGCCG  
GCTAC---GCGGCCGCCGCCCTGGGA---CACCACCA-----CCACCCG  
ACGCACGTCAGCTCG---TACAGCACGGCAGCCTTCAACTCCACGCGGGA  
CTTTCTGTTTCAAAAATCGGGGCTTCGGAGACGCCACCAG-----  
-CGCGCAGCACAGCTTGTTTCGCTCCGC---CGCGGGAAGTTT---C---  
---CGGGGGCCACATGGACACTCGGATGCCGCGGGGCACCTGCTCTTCCC  
CGGCTTGCACGAA---CAAGCCGCAGCCACGCGTCTCCAACGTGGTCA  
ACAGCCAGATGCGACTGGGCTTTTTCGGGGACATGTACGGCCGGGCCGAC  
CAGTATGGCCACGTCACGAGCCCGAGGT---CCGACCACTACGCGTCCAC  
GCAGCTGCACGGCTACGGACCCATGAATATGAACATGGCCGCG---CACC  
ACGGAGCCGGGGCTTCTTTCGGTACATGCGGCAGCCATCAAGCAGGAG  
CTCATCTGCAAGTGGATCGAGCCGGAGCAGCTGTCGAACCCCAAGAAGTC  
GTGCAACAAAACCTTTCAGCACCATGCACGAGCTGGTGACCCACCTGACGG  
TGGAACACGTTGGGGGGCCCCGGAGCAGTCCAACCACATATGCTTCTGGGAG  
GAGTGCGCCCGGGAAGGGAAGCCGTTCAAAGCCAAAATACAAACTGGTGAA  
TCATATCAGAGTTCACTGGAGAAAAGCCCTTTCCGTGTCCCTTCCCGG  
CNN-----

>Beryx decadactylus  
AGCTTCTTGATCCGAGCAGAACTAAGCCAGCCGGGGGCCCTTCTGGGAGA  
TGACCAGATCTACAACGTCATTGTTACTGCACACGCCCTTTGTAATAATTT  
TCTTTATAGTAATGCCAATTATGATTGGAGGATTTGGAAACTGACTAATT  
CCCTAATGATTGGAGCACCCGACATGGCATTCCCCCGAATAAATAACAT

GAGCTTCTGACTTCTTCCTCCCTCCTTCCTCCTTCTCCTGGCCTCTTCTG  
GAGTAGAAGCAGGGGCAGGAACAGGGTGAAGTGTATACCCACCCCTTGCC  
GGGAATCTTGCACACGCAGGAGCCTCGGTTGACCTTACAATCTTCTCTCT  
TCACCTGGCAGGTGTCTCCTCAATCTAGGGGCCATTAACCTTATTACAA  
CCATCATCAACATGAAACCCCCAGCCATTTACAATACCAAACACCCCTG  
TTTGTGTTGAGCAGTGCTGATTACGGCTGTCCTCCTTCTTCTTTCCCTGCC  
CGTACTTGCAGGATACGATACTACTAACAGATCGCAACCTAAACA  
CCACCTTCTTTGACCCCGCAGGAGGAGGTGATCCAATTTCTTACCAACAC  
CTG-----  
-----  
-----  
-----

-----TTTCTAGAGAGGAACCTCCACCCATCTAACTGCCTTGG  
CATGCTGTTGCTGTCTGATGCCACCAGTGTACCAAGCTGTCAGAGCTCT  
CCTGGAGCATGTGCCCTCAGCAACTTTCTGCTATTTGCAAGACAGAGGAC  
TTCTCCAACCTGCCCAAAGACATGGTGGTGCAGCTTCTGTCCCATGAGGA  
GCTGGAGACAGAAGATGAGAGACTGGTTTATGAAGCTGCCCTCAACTGGG  
TCAACTACGACCTGGAAAGGAGGCACTGCCACCTGCCAGAGCTGCTGAGA  
ACAGTCCGACTGGCCCTGCTTCCCTGCCATATTCCCTCATGGAGAATGTCTC  
CACAGAAGAGCTGATCAATGCCAGGCCAAGAGCAAGGAGCTGGTCGATG  
AGGCCATCCGCTGCAAGCTGAAGATCTTGCAGAATGACGGTGTGCTTAAT  
AGCCCCGTGTCTCGACCGAGAAAACCAGCCATGCCCTCTTTCTGCTGGG  
AGGGCAGACCTTCATGTGTGACAAGCTGTACCTGGTGGACAAAAGGCCA  
AAGAGATCATCCCCAAGGCGGACATCCAAGCCCCAGGAAGGAGTTCAGC  
GCCTGCGCCGTGCGCTGTAAGGTCTACATCTCAGGAGGGA--GAGGCTC-  
AGAGAATGGTGTGTCCAAAGATGTATGGGTCTATGACACCGTCCATGAGG  
AATGGTCCAAGGCAGCACCCATGCTCATTGCCAGGTTTGGTCATGGCTCT  
CCTGAGCTGAAACACTGCCTGTACGTGGTAGGAGTCCACACAGCAGCAAC  
TGGCTGCCTCCCAGCCTCTCCCTCGGGAAGAATACATTGTGCTGTTTCACT  
CGTTCAACGACAAGGCTGATTCTGAACGAAGCGGAGCTAATCATGGCGCT  
GGCCAGGAATTTTCAAGATGAGAGTGGTTACGGTATCCCTGGAGGAACAAA  
CTTTTGCCAGCATTGTCCAAGTGTGATCAGTGGGGCCTCCATGTTAGTCAGC  
ATGCATGGAGCTCAGCTTGTACCTCACTCTTCCCTCCCAGAGGAGCTGC  
TGTGGTGGAGCTGTTCCCTATGCTGTGAACCCAGAACAGTACACCCCAT  
ACAAAACCCTTGCCCTCCCTACCAGGCATGGACCTGCAATACGTTTCCTGG  
AGGAACACTATGGAGGAGAACCACATCACCCACCCAGACCGACCCCTGGGA  
ACAAGGAGGAATCGCCCATTTGGAAAAGGACGAGCAAGAACGAATACTGG  
CCAGCAAGGATGTCCCAGGCACCTGTGCTGCCGCAACCCGGAGTGGCTC  
TTCCGAATCTACCAGGACACTTTGGTGGACATCCCGTCATTGGTGGAAAGT  
CCTCAA---AGAGGGTCTGAGG---GCCAGGCCAAGCTTGAAGAA---GG  
CCAAGCCGGCCAGCACGGTTCACCCGGGCGGGTCAGAGAACCCAGTGC  
CACACCTCAGTCCAAGCCACCAACGAGGCAAAACTCACGGTTTCTTGGCA  
GATCCCGTGGAAATCTGAAGTACCTGAAGGTGCGAGAAGTGAAGTAYGAGG  
TGTGGATCCAGAAGAGAGATACCAGCAAGGGAACACTGGAGGATCAAATC  
ATCCAGGCAAACCCTGCCCTGGAGGCCTTTGGTAATGCCAAAACAGTGAG  
GAATGACAACCTCATCCCGTTTTGGAAAATTCATCCGAATTCACCTTCGGAA  
CCAGTGGTAAGCTGTGCTGCTGACATTGAGACTTACCTGCTGGAGAAG  
TCACGTGTCACCTTTCAACTCAAGTCTGAGAGGAACTACCACATCTTCTT  
CCAGATCTTGTCCAATCAGAAGCCAGAGCTGCTGGACATGCTATTGATTA  
CCAACAACCCATATGACTACTCTTACATCTCCCAGGGAGAGGTAACAGTA  
CAATCCATCAACGACTCAGAGGAACTGATAGCCACTGACAGCGCCTTCGA  
CGTGCTTGGCTTCACTCAAGACGAGAAGATGGGAATCTATAAGCTGACCG  
GTGCCATTATGCACTATGGCAACATGAAGTTTAAAGCAGAAGCAGCGTGAA

GAGCAAGCTGAGCCTGACGGAACGGAGGCTGCTGATAAGTCAGCTTACCT  
GATGGGGCTGAACTCTGCAGACCTCATCAAAGGGCTGTGCCATCCCAGAG  
TCAAAGGTAGGAAACGAATATGTCACCAAAGGCCAGGGTGTAGACCAAGTC  
TACTACCCCAACAAGGAGGCCTTCAAGTGCAGGAGTGC GGCAAGCACTA  
CAACACCAAGCTGGGATATAAGCGCCATGTGGCCATGCACTCTGCCACGG  
CAGGGGACCTCACCTGCAAAGTGTGCATGCAGAGCTACGAGAGCACGCCG  
GTGCTGCTGGAGCACCTCAAGAGCCACTCGGGGAAGTCCTCGGGTGGCGC  
CAAGGAGAAGAAACACCCGTGCGACCACTGCGACCGTCGCTTCTACTC  
GAAAGGATGTGAGACGGCACATGGTGGTCCACACGGGCCGAAAGGACTTC  
CTGTGCCAGTACTGTGCCAGCGCTTCGGCAGGAAGACCACCTGACGCG  
GCACGTCAAGAAGAGCCACTCGCAGGAGCTGCTGAAGATCAAGACGGAGC  
CTCCGGATATGTTAGGTCTTTTAGGTTCTGGCTCGCCGCCTTGCTCCGTC  
AAGGAGGAGCTCAGCCCCATGATGTGCAGCATGGGTCCCAACAAAGACCC  
CATGATGGGCAAACCCCTTCCCCAGCGGGGCCCTTCCCGATGGGCATGT  
ACAACCCCAACCAC-----CTCCAGGCCATGTCCAATACTGGGGTGGGT  
CACCC-----CACCCATCCCTGATGCCAGTCCCCTGTCTGCAGCTAT  
GGGCATGGGCTGCCACATGGAATATCTCATCTACGCCCTTTTCTCGTTCA  
TGGGATGTTTACAAAATCAGTGATGGATCAAACATTGTGAATTTGCTGGCT  
AGTAACTCTCCGAGCGTTTCATACGCTCTGACCCAGCAGAAATACTTCAG  
TAACTATAGTCCCGTGATTGGGTTTTACATTTACGAGCCCATTGAGTACT  
GGAACTCCACGGTGCAGGAGCATCTGAAGACACTGAGTCACGGTTTCAAC  
AAGATCTCCTGGATGGACAACCTTCTTCCACTACCTGCGGGTGGTGAACGT  
GAGCGCGTCGACCAAGAGTGACTTTATTACCATCCTCAAGGGCTCCTTCC  
TGCGCAGCCCGGAGTACCAGCACTTCACTGAGGACATCATCTTCTCCAAG  
A---GCCACGAGAGCG-----ATGAGTATGACATTATTGCCTCACGCAT  
GTACCTGGTGGCACGGACCACGGAGAAAAGGCGYGAGGAGGTGGTGGAGC  
TTCTGGAGAAGCTGCGTCCGCTGATGCTGATCAACAGCATCAAGTTCATC  
GCCTTCAACCCACCTTTGTTTTTATGGACCCTACAGCTCCTCGGTCAT  
CTCGCCCATCCTGACCTCAGGCTTCAGCGTGCTCACCATCCTCATCCTCA  
CTTTCTTCTGGTTCATCAACCCCTTGGGAACTTCTGGCTCATCCTGACG  
GTTACTTCTGTGGAGCTGGGCGTCTTGGGTTTAAATGNNNNNNNNNNNNNNNNNNNNGCAGGCCGGCCCTC  
AAGAATGTGTCTGCATCGTGCCATGTGGGCATCATTAATGGGCTCTCTGG  
ATGGGCTGCCTCAGTGGACGATTCCCCAGCTGACACCATCACTCGGCGAT  
TTCGCTATGATGTGGCCCTGGTGTGAGCCTTAAAGGATCTGGAGGAGGAC  
ATCATGGAGGGACTGAAAGAGTGTGGGCTGGAGGACAGCGCTTGCACCTC  
AGGCTTCAGTGTATGATCAAGGAATCTTGTGACGGCATGGGAGATGTCA  
GCGAGAAGCACGGCGGAGGCCGATGGTCCCTGAGAAGGCTGTACGTTTC  
TCTTTTACTGTTATGTCTGTCTGTCTTGGCAGAAGGAGAGGAG-----  
-----AAGGAGGTTACCATCTTTAGGGAGC  
CAAAGCCTAACTCGGAACTGTCTGTAAGCCCTATGTCTGATGTTTGTG  
GATGAGTCAGACCATGAGACACTCACTGCTGTCTTGGGGCCTGTAGTTGC  
AGAGCGTAATGCAATGAAGCAGAGTCGACTCATCCTATCTGTGGGTGGCC  
TGCCTCGCTCCTTCCGCTTCCATTTTCCAGAGGCACAGGATATGATGAGAAG  
ATGGTGCCTGATTTGGAGGGCCTGGAGGCCTCAGGCTCCACCTACATCTG  
CACTCTGTGTGACTCCAGCCGGGCAGAGGCCTCTCACAACATGGTGTGTC  
ACTCCATCACCCGCGGTTCATGATGAAAACCTGGAGCGTTACGAAATATGG  
AGGACCAATCCTTTTTCTGAATCCGCCGAGGAGCTGCGAGATCGGGTCAA  
AGGAGTCTCCGCCAAGCCCTTCATGGAGACCCACCCCACTCTGGATGCAT  
TGCATGTGACATTGGTAATGCCACTGAGTTCTACAAAATCTTCCAGGAT  
GAGATAGGGGAGGTGTACCGGAAGCC---CAAT---CCCACTCGGGAACA  
ACGGCGGAGCTGGAGAGCAGCTCTAGACAAGCAGCTGAGGAAGAAGATGA  
AGCTTAAACCGGTGATGAGGATGAATGGGAACTATGCCCGGAAGCTAATG  
ACCGAGGAGGCTGTGGAGGTGGTATGTGAGCTGGTGCCTCAGAAGAGAG





CGATCAACAACAAGGCTTATTTTAAATGAAGCTGAGCTTATCTTGGCACT  
GGCTCAGGAGTTCCAAATGAAAGTCGTCACAGTATCTATGGAGGAACAAT  
CTTTTCCTAGCATTGTTGAGGTGATCAGTGGTGCTTCTATGTTAGTCAGC  
ATGCACGGAGCTCAACTCATCGCTTCGCTTTTCCCTCCCAGAGGAGCTGC  
TGTTGTGCGAGCTGTTCCATTTGCTGTGAATCCAGAGCAGTACACCCCAT  
ATAAACTCTTGCATCCCTTCCAGGCATGGATCTTATTATATCTCTTGG  
CAAAACAGTAAGGAGGACAACACTATTATTCACCCAGACAGGCCATGGGA  
GCAAGGTGGCATTGCTCACTTAGAGAAGGAGGAACAAGAAAAATCCTGG  
CCAGTAAAAATGTTCCCAGGCACCTATGCTGCCGCAACCCAGAGTGGCTT  
TTCAGGATCTACCAGGACACTTTAGTAGACATCCCTTCCTTTTTTGGAAGT  
TCTCAA---AGTGGGCATGAAA---ACTAAGCCTAGCTTAAAGAA---AG  
CAAGACCTTCTACAACGTCCACCCAGGCCGGGTGAGAGAACCTCAGTGT  
CAGACATCAGTACTAACTCCTAATGAGGCTAAACTCACAGTCTCCTGGCA  
GATCCCCTGGAATCTAAAATACCTAAAGGTAAGAGAAGTGAAATATGAGG  
TTTGGATCCAGAAGAAAGACACCAGCAAGGGGACCTTGGAGGATCAGATC  
ATACAGGCAAATCCTGCTCTCGAAGCCTTCGGCAATGCCAAAACACTGAG  
GAATGACAACCTCGTCCCGTTTTTGGAAAATTCATCCGAATCCATTTTCGGTA  
CAAGTGGCAAGTTGTCGTCTGCTGACATTGAAACATACCTACTGGAGAAG  
TCACGCGTGACTTTTTCAGCTAAAGGCTGAAAGGAACTATCACATCTTCTA  
CCAGATTCTGTCCAATCAGAAGCCGGAAGTCTGGATATGCTGCTGATCA  
CCAACAACCCATATGACTACTCCTACATCTCCCAGGAGAGGTAACAGTT  
GCCTCCATCAACGACTCAGAGGAGCTGATGGCCACAGACAGTGCCTTCGA  
TGTGCTGGGTTTTCACCCCAGAGGAAAAGATGGGTGCTATAAACTAATTG  
GTGCCATCATGCACTATGGCAACATGAAGTTTAAGCAGAAGCAGCGCGAG  
GAGCAGGCGGAACCAGATGGCACCCAGGCTGCTGATAAATCAGCATAACCT  
GATGGGGCTGAACTCTGCTGACCTCATCAAAGGCCGTGTGCCATCCGAGAG  
TCAAGGTAGGAAACGAATATGTGACCAAAGGCCAGAGTGTGGACCAGGTC  
TACTAT-----

-----  
-----  
-----  
-----  
-----  
-----  
-----  
-----  
-----  
-----  
-----

-----TATCTCATCTATGCCTCTTTCTCATTCA  
TGGGATGTTTACAAATCAGCGATGGATCAAATATTGTGAACCTGTTGGCT  
AGTAACTCACCAAGTGTTCATATGCTCTGACCCAGCAGAAGTATTTTAG  
TAACTACAGTCCAGTGATCGGGTTTACATTTATGAGCCCATTGAGTACT  
GGAACTCCACGGTGCAGGAGCACCTAAAGACTCTAAGTCATGGCTTCAAC  
AAAATTTTCATGGATGGACAACCTTTTCCATTACCTTCGGGTAGTGAATGT  
GAGTGCATCTACTAAGAGTGACTTCATCAACATCCTTAAGGGATCTTTCC  
TAAACAGTCCAGAGTACCAGCACTTCACCCAGGACATCATTTCCTCCAAG  
A---ACCGTGAGACTG-----ATGAGTACGACATCATAGCCTCGCGGAT  
GTACTTGGTGGCACGAACTACAGAGAAGAAGCGCGARGAAGTGGTGGAGC  
TCCTAGAAAACTTCGGCCCTTGATGCTAATCAACAGCATCAAATTCATT  
GCCTTCAATCCCACATTTGTGTTTATGGACCGCTACAGCTCCTCCGTCAT  
CTCGCCTATTCTGACCTCAGGCTTCAGTGTGCTCACTATCCTCATCCTCA















AGGAGCTGCTGTGGTGGAGCTGTTCCCCTTCGCTGTAAACCCAGAGCAAT  
ACACCCCATATAAAAACCTGGCCTCCCTTCCAGGCATAGACCTCCACTAT  
GTCTCCTGGAGGAACACCATGGAGGAGAACACCATCACCCACCCAGACAG  
ACCTGGGAACAAGGAGGAATCGCTCACTTGGAGAAGGAGGAGCAACAGC  
GAATACTTTCCAGCAGAGATGTCCCAGGCATCTGTGCTGCCGCAACCCA  
GAATGGCTCTTCCGAATCTACCAGGACACTTTGGTGGACATCCCGTCATT  
CATGGAAGTCCTCAA---AGAGGGCCTGAAG---ACCAGGCCTAGCTTAA  
AGAA---GGCCAAGCCGGCCAGCACCGTCCACCCAGGCCGGGTGAGAGAA  
GCCCAGTGTGACACCTCAGTGCAAACCAGCAGTGAGGCTAAACTCACGGT  
TTCTGGCAGATAACCGTGAATCTGAAGTACCTGAAGGTGAGAGAAGTGA  
AGTACGAGGTG-----AAGAAAAGACACCAGCAAGGGGACACTGGAA  
GATCAAATCATCCAGGCAAACCCAGCACTGGAGGCCCTTCGGTAATGCCAA  
AACATTGAGAAAACGACAACCTCCTCTCGTTTTGGAAAATTCATTGGAATTC  
ACTTTGGAACCAGTGGTAAGCTGTCATCCGCTGACGTTGAGACATATCTG  
CTGGAGAAGTCACGTGTTACCTTTCAGCTCAAGGCTGAGAGGGACTATCA  
CATCTTCTACCAGATCCTGTCCAAACAGAAGCCAGAGCTTTTGGATATGC  
TGCTGATCACAAAACCCCGTATGACTACTCCTACATCTCCCAAGGAGAA  
GTGACAGTTGCATCCATCAATGACGCAGAGGAGCTGATGGCCACCGATAG  
TGCCCTCGACGTGCTCGGCTTCACTTCAGAGGAGAAGATGACTGTCTATA  
AGCTGACTGGCGCCATCATGCACTATGGCAACATGAAGTTTAAAGCAGAAG  
CAGCGTGAGGAGCAGGCTGAACCTGATGGGACAGAGGCTGCTGATAAATC  
AGCTTACCTGATGGGTCTGAATTCTGCAGACCTCATCAAAGGGTTGTGCC  
ATCCAGAGTCAAGGTAGGGAATGAATATGTCACAAAAGGCCAAAGTGTG  
GACCAAGTCTACTATCCCAACAAGGAGGCCCTTCAAGTGTGAGGAGTGTGG  
CAAGCACTACAACACCAAGCTGGGATATAAGCGACATGTTGCCATGCACT  
CTGCCACAGCAGGGGATCTCACCTGTAAAGTGTGCATGCAGATCTACGAG  
AGCACACCGGTGCTCCTGGAGCACCTCAAGAGCCACTCGGGGAAGTCTTC  
GGGTGGCACCAAGGAGAAAAAACCCCGTGTGACCCTGTGATCGTCGTT  
TCTACACACGGAAGGATGTGAGACGGCACATGGTGGTCCACACGGGCCGG  
AAGGACTTTCTGTGCCAGTACTGTGCCAGCGCTTTGGCAGGAAGGACCA  
CCTGACACGTACGTGAAGAAGAGCCACTCTCAGGAGCTGCTGAAGATCA  
AGACGGAGCCCCCGGATATGTTA---CTTTTAGGATCGGGGTCACCACCT  
TGCCCTGTGAAGGAGGAGCTTAGCCCCATGATGTGCGGCATGGGTCCAAA  
CAAAGATCCCATGATGGGAAAACCTTTCCCAAGTGGGGCCCCCTTTCCGA  
TGGGCATGTACAACCCCCACCAT-----CTCCAGGCCATGTCCAATTCT  
GGGGTGGGCCACCCC-----CACCCCTCCTTGATGCCTAGTACCCTGTC  
TGCAGCTATGGGTATGGGCTGTACATGGAATATCTCATCTATGCCCTCTT  
TCTCATTCATGGGATGTTTACAAATCAGTGATGGATCAAACATCGTGAAC  
CTGCTGGCTAGTAACTCTCCAGTGTTCATACGCTCTGACTCAGCAGAA  
ATACTTCAGCAACTACAGTCCCCTTATTGGTTTTTACATTTATGAGCCCA  
TTGAGTACTGGAACCTCCACGGTGCAGGAGCATCTGAAGACTCTGAGTCAC  
GGCTTCAACAAGATCTCCTGGATGGACAACTTTTTCCACTACCTGCGGGT  
GGTGAATGTGAGCGCATCGACCAAGAGTGATTTTATCACCATCCTCAAGG  
GCTCTTCTTACGCAGCCCGGAGTACCAGCACTTCACTGAGGACATCATC  
TTCTCTAAGA---ACCGTGAGACTG-----ATGAGTATGACATAATTGC  
CTCACGCATGTACTTGGTGGCGAGGACCACAGAGAAGAAACGTGAGGAGG  
TGGTGGAGCTGCTGGAAAAGCTACGTCCATTGATGCTGATTAACAGCATC  
AAGTTCATTGCCTTCAATCCCCTTTTGTGTTTTCATGGACCGCTACAGTTC  
GTCTGTCAATTTACCCATCCTGACCTCAGGCTTTAGTGTGCTCACTATCC  
TCATTTCACTTTCTTCCCTGGTCATCAATCCCTTAGGGAACCTTCTGGCTC  
ATTCTGACAGTTACATTTCTGGGAGCTGGGCGTCTTGGGTTTGANNNGTTTTTC  
ACTTATTTGAATGGCAGCCAGCTCTCAAGAATGTGTCTGTATCCTGCAAT  
GTTGGTATTATTAATGGGCTCCCTGGATGGGCTGCCACTGTGGATGACTC





CCGTCAGCCAGAACTGGACCTTCCACGGGCCTGGCGCCAGCGGGCAGGCG  
GCGGCCAACTGGCTGGCTGGATTTGGTAGAGGTCCACGCCTCCTACTTT  
GCTGGGCATCCGGCAGAACAGCAACGCAGCGGGCCGAGGCGTCTGCTGG  
TGCTGGACGAGTTCAAAACAGAGAAGAGGATTAGCAGGATGTTCTACATC  
ATGACGTTTTTCTTCCCTGGCACTGTGGGGGCCATATCTGGTAGCCTGCTA  
CTGGCGGGTGTGGCAAGGGGCCCTGTAGTCCCCGTGGGCTACCTGACAG  
CAGCCGTGTGGATGAGCTTTGCCAGGCAGGGGTCAACCCTTTCATCTGC  
ATCTTCTCCAACAGGGAG-----

-----  
-----  
-----  
-----  
-----  
-----  
-----  
-----  
-----  
-----  
-----  
-----  
-----  
-----  
-----  
-----  
-----  
-----  
-----  
-----  
-----  
-----

-----CATCACTCAACA  
GGCGAAGTCACAGAGAGAGAAGTGGCGTTGGGGATAAATCCTTTCGCGGA  
CGGCATGGGCGCCTTCAAAATAAACCACAGCTCCCATGATATTGGTTCCG  
G---ACAACCGGCGTTTCTCTCAGGCG---CCCGCTAC---GCAGCG  
GCCGCCCTGGGA---CACCATCA-----CCACCCGACCCACGTTGGCTC  
T---TACTCCACGGCGGCTTTCAACTCCACCAGGGACTTTCTCTTCAGAA  
ATCGGGGTTTTGGAGACGCCACCGG-----GGCTCAGCACAGT  
TTGTTTCGCCCTC-----CGGAAGTTT---C-----GCAGGGCCACA  
TGGACACTCAGATGCAGCGGGGCACCTGCTCTTCCCAGGGCTCCACGAG-  
--CAAGCAGCGAGCCATGCGTCTTCCAACGTGGTCAACAGCCAGATGCGA  
CTGGGCTTCTCGGGGACATGTACGGTCCGGGCCGATCAGTACGGCCACGT  
TACAAGCCCCGAGGT---CCGACCACTATGCTTCGACCCAGTTGCACGGTT  
ATGGCCCCATGAACATGAATATGGCCGCA--CACCACGGAGCAGGGGCC  
TTCTTTCGATACATGAGGCAGCCGATCAAACAAGAGCTCATCTGCAAGTG  
GATCGAGCCGGAGCAGCTGACAAATCCCAAAAAGGCGTGCAACAAAACCTT  
TTAGCACGATGCATGAGCTTGTGACCCACTTGACAGTGGAGCATGTGGGG  
GGACCAGAGCAGACCAACCACATCTGCTTCTGGGAGGAGTGCGCCAGAGA  
AGGAAAACCATTCAAAGCCAAATACAAACTTGTAATCATATCAGAGTAC  
ACACCGGAGAAAAACCTTTCGGTGTCCGTTCCCAGGCTGTGGCAAA

>Brotula multibarbata

AGCCTACTAATCCGAGCAGAACTCAGTCAACCAGGAGCCCTTCTTGGAGA  
TGACCAAATTTATAATGTCATTGTTACAGCCCATGCTTTCGTAATGATTT  
TCTTTATAGTAATAACCAATTATGATTGGGGGCTTTGGAAACTGGTTAATT  
CCACTTATGATTGGAGCCCCAGACATGGCATTCCCCCGAATGAACAACAT  
AAGCTTCTGGCTTCTTCCCTCCCTCATTCCTTCTTCTGCTGGCCTCATCAG  
GAGTTGAAGCCGGGGCTGGTACTGGGTGAACTGTATATCCGCCCCCTTGCT  
GGAAACTTAGCCCATGCAGGAGCATCTGTAGATCTTACTATCTTCTCCCT  
TCATCTGGCAGGGGTATCATCTATTC TAGGGGCCATTA ACTTCAATTACAA  
CAATTATTAACATGAAACCCCCGCAATTTGCAATACCAAACACCTTTA  
TTCGTATGAGCCGTTCTAATTA CTGCAGTACTTCTTCTTCTTTTACC  
AGTCCTTGCTGCAGGAATTACAATGCTTCTAACAGATCGAAACCTTAACA  
CCACTTCTTTGACCCCGCTGGAGGAGGTGATCCTATCTTATAACCAGCAC

CTA-----  
-----  
-----  
-----  
-----

NNNNNNNNNNNNNNNNNNNNNNNNNNNNNNNNNNNNNNNNNNNNNNGGCATGCTATTGCTGTCTGACGCCCATCAGTGTA  
CCAA

GCTGTCAGAGCTCTCCTGGGGCATGTGCCTCAGCAACTTTCCCGCTATCT  
GCAAGACGGAGGACTTCCTCCAATTGCCCAAAGACATGGTGGTGCAGCTG  
CTGTACACGAAGAGCTGGAGACAGAAGACGAGAGACTGGTCTACGAAGC  
GGCCCTGAACTGGATCAACTATGACCTGGAGAGGAGGCACTGCCATCTTC  
CAGAGCTCCTGAGAACAGTCCGCCCTGGCCTTGCTGCCTGCCATCTTCCTC  
ATGGAGAACGTCTCGACGGAAGAGCTGATCAACGCCCCAGGCCAAGAGCAA  
GGAGCTGGTGGACGAGGCCATCCGCTGCAAGCTGAAGATCCTGCAGAACG  
ACGGCGTGGTCAACAGCCCGTGTGCCCGGCCGAGAAAAACCAGCCACGCC  
CTCTTTCTGCTGGGAGGGCAGACTTTCATGTGCGACAAGCTGTACCTGGT  
GGACCAGAAAGCCAAAGAGATCATCCCCAAAGCCGACATCCCCAGCCCCA  
GGAAGGAGTTCAGCGCCTGTGCCATCGGCTGCAAGGTGTACATCACAGGT  
GGGA--GGGGTTC-GGAGAACGGGGTGTCCAAAGACGTGTGGGTCTACGA  
TACCGTCCACGAGGAATGGTCCAAGCGGGCGCCCATGCTCATTGCCAGGT  
TCGGCCACGGTTCCGCCGAGCTGAAACACTGCCTGTACGTGGTGGGAGGT  
CACACGGCAGCCACCGTTCCTCCCGCCTCCCCCTCGGGATGAATACA  
TAGTTGTGTTTTCAGTCGCTCAACAACAAGGCTGATCCTGAATGAAGCAGAG  
CTGATCATGGCACTGGCCCAAGAGTTTCAGATGAGAGTGGTTACTGTATC  
CCTGGAGGAACAGTCTTTTCCCAGTATTGTCCAGGTGATCAGCGGTGCTT  
CCATGTTGGTTAGTATGCATGGGGCACAGCTCATTACGTGCTCTTCCTC  
CCCAGAGGAGCTGCTGTGGTGGAGCTTTTCCCCTTTGCTGTGAACCCGGA  
GCAGTACACCCCATACAAAACCCCTGGCCTCCCTTCCAGGCATGGACCTGC  
ACTATGTCTCCTGGAGGAATGCCATGGAGGAGAACACGGTCACCCACCCA  
GACAGACCCTGGGAGCAGGGGGGCATTTGTTTACCTGGAGAAGGAGGAGCA  
GGAGCGAATACTTACCAGCAAAGATATCCCAAGGCACCTGTGCTGCCGCA  
ACCCGGAGTGGCTCTTCCGAATCTACCAGGACACTTTGGTGGACATCCCT  
TCGTTCCTGGACGTCGTCAG---AGAGGGCTTGAAG---ACCAAGCCTAA  
CTTGAGGAA---GAACAAGCCGGCCAGCACAGTTTACCCCGGTTCGGGTCA  
GAGAAGCACACTGTACAGCTCAGTGCAAACCAGCAGCGAGGCTAAACTC  
ACAGTTTCCCTGGCAGATCCCGTGAATCTGAAGTACCTGAAGGTGAGAGA  
GGTGAAGTATGAGGTGTGGATCANNNAAGAAAGACACCAGCAAGGGGACGCTGG  
AAGATCAAATCATCCAGGCCAACCCGGCATTGGAGGCCTTCGGTAACGCT  
AAAACCTTAAGAAATGACAACCTCATCACGTTTTGGGAAATTCATCCGAAT  
TCACTTTGGAAACAGTGGCAAGTTGTGCTCCGCTGACATTGAGACATATT  
TGCTGGAGAAGTCACGCGTCACCTTTCAGCTCAAGGCTGAGAGGAATTAC  
CACATCTTCTACCAGATCCTGTCCAATCAGAAACCAGAGCTGTTGGACAT  
GCTGTTGGTCAAAAACAACCCATACGACTACTCCTACATCTCTCAAGGAG  
AAGTAACGGTTCGATCAATCAATGACTCTGAGGAGCTGATGGCCACYGAC  
AGTGCTTTCGATGTGCTCGGCTTTACMCGGAAGAAAAAATGGGCGTTTA  
TAAGCTGACTGGCGCCATCATGCATCACGGCAACATGAAGTTTAAGCAGA  
AGCAACGTGAGGAGCAAGCCGAACCTGATGGGACGGAGGCTGCGGATAAA  
TCAGCCTATCTGATGGGTCTGAACTCTGCAGACCTCATAAAGGGGCTGTG  
CCATCCCAGAGTGAAGGTAGGGAATGAGTTTGTACTAAAGGCCAAAGTG  
TGGACCAGGTCTACTACCCCAACAAAGAGGCCTTCAAGTGTGAGGAGTGT  
GGCAAGCACTACAACACCAAGTTGGGATACAAGCGGCATGTGGCCATGCA  
CTCCGCCACAGCAGGGGATCTCACCTGTAAAGTTTGCATGCAGAGCTACG  
AGAGCACACCAGTGCTCCTGGAACACCTCAAGAGCCACTCTGGGAAGTCC

TCGGGCGGCACCAAGGAGAAAAACACCCGTGTGATCACTGCGATCGACG  
TTTCTACACGCGGAAGGATGTGAGACGGCACATGGTGGTCCACACGGGCC  
GGAAGGACTTTCTGTGCCAGTACTGTGCCAGCGCTTTGGCAGGAAGGAC  
CACCTGACACGTACGTGAAGAAGAGCCACTCTCAGGAGCTGCTGAAGAT  
CAAAACGGAGCCCCCGGATATGTTAGGTCTTTTAGCTTCCGGGTGCGCCAC  
CTTGCTCTGTGAAGGAGGAGCTTAGCCCCATGATGTGTGGCATGGGTCCA  
AACAAAGACCCCATGATGGGGAAACCGTTCCCAAGTGGGGCCCCTTTCC  
GATGGGCATGTACAACCCCCACCAC-----CTCCAGGCCATGTCCAATT  
CTGGAGTGGGCCACCCC-----CACCCCTCCTTGATGCAGAGCACCCCTG  
TCTGCTGCTATGGGTATGGGCTGTCACATGGAGTATCTCATCTATGCCTC  
TTTTCTATTTCATGGGATGTTTACAAATCAGCGACGGATCCAACATTGTGA  
ATCTGTTGGCGAGTAACTCTCCGAGCGTGTGCTACGCCGCCACCCAGCAG  
AAATACTTTAGCAACTACAGTCCAGTGATTGGGTTTTACATTTACGAGCC  
CATTGAGTACTGGAATTCTACGGTGCAGGAGCATCTGAAGACTCTGAGTT  
ACGGCTTCAATAAGATCTCCTGGATGGACAACCTTTTTCCATTACCTGCGG  
GTGGTGAACGTGAGCGCTTCAACCAAGAGCGATTTTTATCACCATCCTCAA  
GGGTTCTTTCTTGACAGCCCGGAGTACCAGCACTTCACCGAGGACATCA  
TTTTCTCTAAGA---ATCACGAGACTA-----ACGAGTATGACATTATT  
GCCTCGCGATTGTACTTGGTGGCGAGGACCACCGAGAAGAAGCGTGAGGA  
GGTGGTGGAGCTTCTGGAAAAGCTTCGTCCGTTGATGCTGATTAACAGCA  
TCAAGTTCATTGCCTTCAACCCACCTTTGTGTTTCATGGACCGCTACAGC  
TCCTCTGTAATCTCACCCATACTGACCTCAGGCTTTAGCGTGCTCACTAT  
CCTCATCCTCACTTTCTTCTCGTCATCAACCCCTTAGGGAACCTTCTGGC  
TCATCCTGACAGTGACATCCGTGGAGCTGGGTGCTTGGGTCTGATGGGT  
TTTCATTTCATTTGAATGGCAGCCAGCTCTCAAAAATGTGTCTGCGTCCTG  
CAACACAGGCATTATTAACGGGCTCTCAGGGTGGGCCTCTACGGTGGATG  
ACGCCCCAGCTGAGACAATCACTCGCCGCTTCCGCTACGATGTGGCGCTG  
GTGTCAGCATTAAAGGATCTGGAGGAGGACATTATGGACGGACTGAGAGA  
GTGTGGGCTGGAAGACAGCGCTTGTACCTCAGGCTTCAACGTTATGATCA  
AGGAGTCTTGTGACGGCATGGGGGATGTCAGCGAGAAACACGGCGGAGGA  
CCGGCGGTTCTGAGAAGGCTGTACGTTTTCTCTTTCACTGTTATGTCTGT  
CTCCGTCCAGGCGAGCGGAGACGAG-----  
-----GAGGCGGTTACCATCTATACAGAGCCCAAGCCAAACTCAGAACTG  
TCCTGCAAGCCCTCTGCCTCATGTTTGTGGATGAGTCAGACCACGAAAC  
TCTCACAGCTGTCTTGGGCCCATCGTTGCAGAGCGAAGAGCAATGAAAG  
AGAGCAGACTCATCTCTCCATCGGGGGCCTGCAGCGATCCTTCCGCTTC  
CACTTCAGGGGCACCCGGGTACGACGAGAAGATGATGCGTGAGATGGAGGG  
CCTGGAGGCGTCCGGTTCGACCTACGTCGCACTCTCTGCGACGCGAGTC  
GGGCAGAAGCCGCGCAGAACAAGGTGYTGCCTCCATCACCCGCGGACAC  
GAAGAGAACTTAGAACGCTACGAGATTTGGAGAACCAACCCCTTTTCGGA  
GTCCACAGAGGAGCTGCGCGATCGAGTCAAAGGGGTCTCTGCCAAACCCT  
TTCTGGAGACGCACCCCAATGGACGCTTTGCACTGCGACATCGGAAAT  
GCCACTGAGTTCTACAAAATCTTCCAGGACGAGATAGGGGAGGTGTTCAA  
AAAGGT---CAAT---CCCACGCGGGAGGAGCGGCGGAGCTGGAGGGCAG  
CACTAGACAAACAGCTGAGGACGAAGATGAAGCTTAAGCCGGTAATGAGG  
ATGAACGGGAACTACGCCCCGAAAGTTAATGACCCTGGAGGCCGCGGAGGT  
TGTGTGTGAGCTGGTGCCATCGGAGGAGCGCAGGGAGGCGTTGAGGGAGC  
TCATGAGGCTGTACCTTCAGATGAAGCCCGTTTTGGCGCGCCACCTGCCCC  
GCCAAAGAATGCCCCGACCAGCTGTGCCGCTACAGCTTCAACTCCCAGCA  
CTTCGCCGACCTCCTCTCCTCTACGTTTACGTTACCGCTACAACGGAAAA  
TAACCAATTATTTGCACAAAACCTGGCCACGTCCCCGAAATCATTGAG  
AGAGATGGATCCATCGGAGCCTGGGCCAGCGAGGGGAACGAATCGGCCAA  
CAAAATCATACTGTATTGAGATGGGAGCCCTGGGGCCCCAGTGGAAGGAGA

GCCCCAGCCTTTCAACTGCTCAGTGGAAAGATCCGACGAAACAGACAAAG  
TTCAAGGGCATCAAGACCTACATTTCCCTACCGGGTCACGCCGAGCCACAT  
AGGACGCCCGTCTACAGACGCTACAAACACTTTGACTGGCTGTATAACC  
GCTTACTGCACAAGTTCACTGTGATCTCCGTACCCACCTGCCTGAGAAG  
CAGGCCACTGGCCGATTTGAGGAAGACTTCATCGAGAAGCGCAAAAGACG  
GCTGATACTGTGGATGAACCACATGACCAGTCACCCAGTCCTCTCCAGT  
ACGAAGGCTTTGAGCACTTTTTGATGTGTGCCGATGACAAGCAGTGGAAA  
CTGGGCAAGAGGCGAGCCGAGAAGGACGAAATGGTGGGTGCCATTTTCAT  
GCTGACCCTCCAGATTCCTAACGAACACCAGGACCTTCAGGATGTTGAGG  
AGCGAGTTGACGCCTCAAGTCCTTTGCAAGAAAAATGGATGATAGCGTC  
CTGCAGCTCACTCACGTTTTCTCAGAGCTGGTGCGCAAACACATCGGTGG  
ATTCGGGAAGGAGTTCCAGCGGCTTGGAAATGCATTCAGTCCATCAGCC  
AAGCCTTCATGCTGGACCCTCCCCACTCCTCAGAACCCCTCAACAACGCC  
ATCTCCCATNNNNNNNNNCGTTTTCTCAAACCTGACCTCTCTGGGGCTTCATCATCGGCCTC  
GGCGTGGTTCGGCAACCTCCTGATCTCCATCCTGCTGGTCAAAGACAAGAG  
CCTGCACCGCGCGCCCTACTACTTCCCTGCTGGACCTGTGCGCCTCGGACA  
TCCTGCGTTCCGCTATCTGCTTCCCTTTTGTCTTCACCTCGGTCAAGAAT  
GGCTCTGCCTGGACCTACGGCACGCTCACCTGCAAAGTGATCGCCTTCCT  
GGGCGTGTCTCTGTTTTCCACACGGCGTTCATGCTGTTTTTGCGTCAGCG  
TGACACGCTACTTAGCCATCGCGCATCACCGTTTCTACACGAAGAGGCTG  
ACCTTTTGGACCTGCCTGGCCGTCATCTGCATGGTGTGGACGTTGTCCGGT  
GGCCATGGCTTTCCCGCCGGTGTAGACGTAGGGACGTACTCGTTCATCC  
GGGAGGAGGACCAGTGCACATTCAGCACCGCTCCTTCAGGGCCAATGAC  
TCCCTGGGCTTCATGCTCCTGCTGGCGCTCATCCTCCTGGCCACACAGCT  
GGTTTACCTCAAGCTCATCTTCTTCGTCCACGACCGCCGGAAGATGAAAC  
CTGTCCAGTTTCGTGCCTGCCGTCAGCCAGAACTGGACCTTCACGGGCCG  
GGCGCCAGCGGGCAGGCGGCCAAGCTGGCTGGCCGGATTTGGTCGCGG  
TCCCACCCCTCCTACTTTACTGGGCATCCGGCAGAACAGCAACGCAGCAG  
GCCGCCGGCGTCTACTGGTGTGGATGAATTCAAACAGAGAAGAGGATT  
AGTAGGATGTTTCTACATCATGACGTTTTTCTCCTGGCACTGTGGGGCCC  
GTATCTGGTTCGCTACTGCGGGTGTGTTGCTAGGGGCCCGTGGTCC  
CTGGGGTTACCTGACGGCAGCCGTGTGGATGAGCTTTGCCAGGCTGGG  
GTCAATCCTTTCATCTGCATCNNNNNNNNNNNNNNNN-----

-----CATCACTCA  
ACAGGCGAAGTCACAGAGAGAGAAGTGGCGTTGGGGATAAATCCTTTTCGC  
GGACGGCATGGGCGCCTTCAAATCAACCACAGCTCCCACGATATTGGCT  
CCGG---ACAGACGGCGTTTTCTCCAGGCG---CCCGGTAC---GCA  
GCGGCCGCCCTGGGA---CACCATCA-----CCACCCGACCCACGTTGG  
CTCT---TACTCCACGGCGGCTTTCAACTCCACCAGGACTTTCTGTTC  
GAAATCGGGGTTTCGGGGACGCGGCCGG-----CGCGCAGCAC



AGGAGGAAAACACTGTCACCTTACCCAGRCAGGCCATGGGAACAAGGAGGC  
ATCGCTCACTTGGAGAAGGCAGAGCAGGAGCGAATACTCAACAGCAGAGA  
CGTTCCAGGCACTTGTGCTGCCGCAACCCAGAGTGGCTGTTCCGAATTT  
ACCAGGACACTTTAATAGACGTTCCCTTCATTCTAGCTGTCCTCAA---G  
GAGGGCATAAGG---ACCAAGCCCAGTGCGAAGAA---GTCCAAAATAGC  
TAGCATGGTTCATCCAGGCCGCGTTAGGGAAGCTCGGTGTCAAACCTCAG  
TACAGACCAGCAGTGAGGCCAAACTGTTAGTTTCTGGCAGATCCCATGG  
AACCTTAAATTCTTAAAAGTCAGAGAGGTGAAGTACGAAGTTTGGATTCA  
AAAAAAGACACCAGCAAAGGCACCCGAGGATCAAATCATAACAGGCCA  
ATCCCGCACTGGAGGCCCTTGGCAACGCAAAAACACTTCGGAACGACAAC  
TCTTCCCGTTTTCGGAAAATTTATCCGGATACACTTTGGCACCAGCGGAAA  
GTTGTGCTGCGGACATTGAGACATACTTGCTGGAAAAGTCACGTGTTA  
CTTTTCAGCTGAAGGCTGAGAGAACTACCACATATTCTACCAGATCCTG  
TCCAATCAGAAGCCGGAGCTTCTCGACCTGCTGCTCATCACCAACAATCC  
ATACGATTACCCGTACATCTCCAGGGTGAGGTGACAGTCGCCTCCATCA  
ATGATGCCGATGAGTTGATGGCCACTGACAGTGCCTTTGATGTGCTGGGC  
TTCACCCCTGAGGAGAAAATGGGCGTTTACAAGCTCACCGGCGCCATCAT  
GCACCATGGCAACATGAAGTTCAAGCAGAAGCAGCGTGAGGAGCAGGCTG  
AGCCGGATGGAACCGAAGCTGCCGACAAGGCTGCGTATCTGATGGGGCTG  
AACTCTGCCGACCTCATCAAAGGGCTGTGCCACCCTCGGGTGAAGTTCGG  
AAATGAGTTTGTACCAAAGGTCAGAGTGTGGACCAAGTCTACTATCCCA  
ACAAGGAGGCTTTCAAGTGCAGGAGTGCGGGAAGCACTACAACACCAAG  
CTTGATATAAGCGCCATGTGGCTATGCACTCCGCTACCGCTGGTGACCT  
CACCTGTAAAGTGTGCATGCAGAGCTATGAGAGCACGCCTGTTCTCCTGG  
AGCACCTCAAGAGCCACTCTGGCAAGTCTCAGGTGGAGCCAAGGAGAAG  
AAACACCCATGTGACCACTGTGACCGGCGTTTCTACACACGAAAGGATGT  
GAGAAGACACATGGTGGTGCACACAGGCCGGAAGGATTTCTGTGCCAGT  
ATTGTGCCAGCGCTTCGGCAGGAAGGATCACCTGACACGCCATGTGAAA  
AAGAGCCACTCGCAGGAGCTGCTGAAAATWAAGACTGAGCCTCCGGACAT  
GTTAGTCTTTTAGCTTCAGGGTCACCGCCTTGTTCTGTGAAAGAGGAGY  
TAAGCCCCATGATGTGCGCCATGGGTACCAATAAAGACCCCATGATGGGT  
AAAGCTTTCCCTAGTGGTGGCCCATTTTCAATGGGCATGTACAACCCCA  
CCAT-----CTTCAGGCCATGTCAAATTCTGGGGTGGCTCATCCA----  
--CACCCGACCCTGATGCCTGGCTCCCTGTCTGCAGCAATGGGCATGGGC  
TGTCACGTGGACTATCTCATCTACGCCTTTTTTCATTCATGGGATGTTT  
ACAAATCAGCGATGGCTCAAATATGTAAATCTCCTCGCCAGTAACTCAC  
CAAGTGTTCATACGCGCTGACACAGCAGAAATACTTCAGCAACTACAGT  
CCTGTGATCGGATTTTACATTTATGAGCCCCCTCGAGTACTGGAATCCAC  
AGTGCAGGAGCACATAAAGACTCTGAGTCACGGTTTCAACAAGATCTCCT  
GGATGGACAATTTTTTCCACTACCTGCGGGTGGTGAATGTGAGTGCGTCG  
ACAAAGAGTGATTTTATCTCGATTCTGAAGGGCTCCTTCCTGCGGAGCCC  
CGAGTACCAGCACTTCACCGAGGACATCATATTTTCRAAGA---ACCATG  
AAACTG-----ATGAATACGACATCATCGCCTCGCGCATGTACCTGGTG  
GCGCGGACCACCGAAAAGAAGCGGGAAGAAGTGGTGGAGCTTCTGGAGAA  
GCTGCGCCCGTTGATGCTCATCAACAGCATCAAGTTCATTGCCTTCAACC  
CCACGTTTGTTTTTATGGACCGCTACAGTTCCTCCGTCATTTTCGCCATA  
TTAACCTCAGGCTTTAGTGTCTAACTATTCTCGTCCCTCACGTTATTCCT  
CGTCATCAACCCCTTGGGGAACCTTGGGCTCATCTCACAGTTACATCCG  
TGGAATCGGTGTCTGGGTCTGATGNNNNNNNNNCAGTTTGAATGGCAGCCGTCGCTT  
AAGAAATGTCTCCGCGGATTGGGGCGTCGGCATTATCAATGGACTCTCCGG  
ATGGACTTCCTCCGTGGATGAGTCTCCAGCTGCCACCATCACTCGACGCT  
TCCGCTATGATGTTGCCCTGGTGTGAGCGCTAAAGGATATGGAGGACGAG  
ATCTTAGAGGGACTGAGGGAGAATGGAATCGAAGACAGTGCTTGCACAGC

CGGCTTCAGTGTCTTGATAAAAGAGTCTTGTGATGGCAGTTGGGAGACGTCA  
GTGAAAAGCATGGGGGGGGACCGGCCATCCCAGAGAAGGCCGTGCGCTTC  
TCCTTCACTCTGATGTCATTTCTCTGTCAAAGACAACGGCGAG-----  
-----AAAGACGTCAACATTTTACAGAAC  
CCGGGCCCAACTCAGAACTGTCTGCAAGCCCTTTGTTTGGATGTTTCGTC  
GATGAATCGGATCACGAGACCCTCACTGCAGTGCTGGGGCCAATCGTTGC  
TGAGCGTAACGCGATGAAGGAAAGCCGGCTCATCTCTCCATCGGAGGGC  
TTCAACGCTCGTTCGCTTCCACTTTCAGAGGGACGGGGTACGATGAAAAG  
ATGGTGAGAGAAGTGGGAGCCTCGAATCCTCAGGGTCCGCCTATATTTG  
CACTCTGTGTGACTCCAGTCGAGCGGAAGCCTTAGAAACATGGTGCTGC  
ACGCCGTCACCCGCAGCCACGGTGAGAACCTGGAGCGTTATGAAATATGG  
AGAACCAATCCGTTTTTCCGAGTCGGTAGAGGAACTACGAGATAGAGTCAA  
GGGGGTCTCCGCTAAGCCCTTCATGGAAACTCAGTCCACACTAGACGCGC  
TGCCTGTGACATCGGCAATGCCACAGAGTTATAACAAAATATTCCAGGAT  
GAAAATCGGAGAGGTTTTTAAAAAGGT---CAAT---CCCAGCCGGGAGGA  
GCGCGCAGCTGGAGGGCAGCGCTGGACAAAGAGCTGAGGAGGAAGATGA  
AGCTGAAACCTGTGATGAGGATGAATGGGAACTATGCCCGAAAGCTAATG  
ACTCTAGAGACAGTGGAGGTTGTGTGTAAGCTGGTGCCCTCAGCGGAGAG  
GAGGGAGGCCCTGAGGGAGCTCATGCGGCTGTATCTCCAGATGAAGCCTG  
TGTGGCGGGCAACCTGCCAGCCAAAGAATGCCCGACCAGCTGTGCCGC  
TACAGCTTTAACTCGCAGCACTTTGCCGACCTCCTCGCCACCACATTTAA  
ATATAGATACAACGGAAAGATAACCAATTACCTGCACAAAACCTGGCTC  
ACGTGCCCGAAATCATAGAGAGAGACGGTTCCATCGGAGCGTGGCGGAGC  
GAGNNNNNNNNNNNNNNNNNNNNNNNNNNNTCATATACTATTGAGATGTGCCAATAGGACCTAAGTGGAAGGAAA  
G  
CCCACAGCCCTTCTCCTGCTCAATTGAAGATCCTACAAAACAGACCAAGT  
TTAAAGGAATAAAGACATACATATCCTACCGGGTACGCCAAGTCATACG  
GGTCGACCTGTTTTACAGACGTTATAAACACTTTGACTGGCTATACAACCG  
CCTGTTGCACAAGTTCACCGTGATCTCAGTGCCCTCACCTGCCAGAGAAGC  
AGGCCACAGGGCGCTTTGAGGAAGACTTTTATTGAGAAAACGCAAGAGACGT  
TTGATTTTTGTGGATGAACCACATGACAAGTCACCCAGTCTTTCTCAGTA  
TGAAGGCTTTGAACATTTTCCTTATGTGTGCTGATGATAAACAAATGGAAGC  
TGGGTAAAAGGAGAGCGGAGAAGGATGAGATGGTTGGGGCCCACTTTATG  
CTGACTTTGCAAATTTCCAAACGAACACCAGGACCTCAGGATGTTGAGGA  
AAGAGTGGACACTTTTAAGGCCCTTTGCAAAGAAAAATGGATGACAGTGTCT  
TGCAGCTCACTCATGTGGCCCTCCGAGCTGGTGCGAAAGCATCTGGGTGGA  
TTCAGGAAAGAGTTCCAACGCCTTGGAATTCTTCCAGTCCGTCAGTCA  
GTCGTTTATGCTTGACCTCCTAACAGCTCTGAGGCCCTCAACAGCGCCNNNNNNNNNNNNNNNNNNA  
CGTTCCTCAAATGACCTCACTTGGTTCATCATCGGCATCGGCCTGGTTC  
GGGAACCTCCTGATCTCCATCCTGCTGGTCAAAGACAAGAGTCTGCACCG  
GGCGCCCTACTACTCTCCTGCTGGACCTCTGCGCCTCGGACATCCTTCGCT  
CAGCCATCTGCTTTCCCTTCGTCTTACATCGGTCAAGAATGGTTCGGCG  
TGGAGCTACGGCACGCTGACCTGCAAGGTGATCGCCTTCCTGGGCGTGT  
GTCTTGCTTCCACACGGCGTTTATGCTCTTCTGTGTCAGCGTTACACGGT  
ACCTGGCCATCGCCACCACCGCTCTACACCAAGAGGTTGACCTTCTGG  
ACCTGCCTGGCCATCATCTGCATGGTGTGGACGCTGTGGGTGGCGATGGC  
ATTCCCGCCGGTACTGGACGTGGGGACGTAACATTCATCCACGAGGAGG  
ACCAGTGCCTTTCCAGCACCGGTTCGTTCCGGGGCAACGACTCGCTAGGC  
TTCATGCTCCTGCTGGCGCTCATCCTTCTCGCCACACAGCTGGTTCCT  
CAAGCTCATATTCTTTGTACACGACCGTCGGAAGATGAAGCCGGTCCAGT  
TCGTACCCGCTGTGAGCCAGAATTGGACTTTCCATGGACCAGGGGCGAGC  
GGGCAAGCCGCAGCCAACTGGTTAGCTGGATTTGGCAGAGGCCCCAACACC  
ACCGACTTTGCTGGGAATCCGTCAAGAACAGCAATGCCGCCGGTTCGACGCC

GTCCTCTGGTTCTGGATGAGTTTAAAGACGGAGAAGAGGATTAGTAGGATG  
TTCTACATCATGACGTTTTTCTTCTGGCTCTGTGGGGCCCGTACCTGGT  
CGCCTGCTACTGGCGGGTGTGGCCAGGGGTCCGGTGGTCCCRGCGGGCT  
ACCTGACGGCTGCCGTGTGGATGAGCTTTGCGCAGGCCGGGGTCAATCCT  
TTCATCTGCATCTTCTCCAACCGAGAG-----

-----  
-----  
-----  
-----  
-----  
-----  
-----  
-----  
-----  
-----  
-----  
-----  
-----  
-----  
-----  
-----

-----NNNNNCTC

AACAGGCGAAGTCACAGAGCGAGAAGTGGCGTTGGGGATCAATCCCTTCG  
CAGACGGGATGGGCGCCTTCAAGATCAACCACAGTCCCACGACATCGGC  
TCCGG---GCAGACGGCGTTTTCTCGCAGGCG---CCCGTTAC---GC  
AGCAGCCGCCCTCGGG---CACCA---CCATCCGACCCACGTTG  
GCTCC---TACTCCA-----CGTTCAACTCCACCCGGGAGTTTCTGTTC  
AGGAATCGAGGCTTCGGGACGCAGCCGG-----AGCGCAGCA  
CAGTTTGTTCGCCCTC-----CGGGAGTTT---C-----GCGGGC  
CACACGGACACTCAGATGCGGCGGGGCACCTGCTCTTCCCCGGGCTCCAC  
GAG---CAAGCGGCCAGCCACGCTACCTCCAATGTGGTCAACAGCCAGAT  
GCGACTGGGCTTCTCGGGGACATGTACGGACGGGCGGACCAGTACGGTC  
ACGTTACGAGTCCACGCT---CCGACCACTACGCGTCCACCCAGTTGCAC  
GGCTACGGCCCCATGAACATGAACATGGCCGCG---CACACGGAGCCGG  
GGCCTTCTTCAGGTACATGAGACAGCCATCAAGCAGGAGCTCATCTGCA  
AGTGGGTCGAACCGGAGCAGCTGACGAACCCAAAAGTCGTGCAACAAA  
ACTTTCAGCACGATGCATGAACTGGTGACCCATCTGACCGTGGAGCATGT  
GGGGGGCCGGAGCAGACCAACCATATCTGCTTCTGGGAGGAATGTGCCA  
GAGAGGGGAAGCCCTCAAAGCGAAATACAACTTGTGAATCATATCCGG  
GTACACACGGGGGAGAAGCCCTTCCCCTGCCCCTTCCCAGGCTGTGGCAA

A

>Cantherhines pullus

AGCCTTTTAATTCGGGCGGAGCTAAGCCAGCCCCGGCGCCCTTCTGGGGGA  
CGACCAAATTTATAATGTGATCGTCACAGCTCACGCTTTCGTAATAATTT  
TCTTTATAGTAATGCCAGTCATGATTGGAGGCTTCGGAAACTGGCTTGTT  
CCACTGATAATTGGGCGCCCCGACATGGCCTTTCCTCGAATGAACAATAT  
GAGCTTCTGACTGCTCCCCCTTCTTCTTCTTCTCCTCGCTTCTTTCAG  
GAGTTGAGGCTGGAGCCGGAAGTGGTGGACCGTATACCCCTCTAGCA  
GGCAACCTTGCCCATGCAGGAGCATCCGTAGATTTAACAATTTTCTCTCT  
GCATCTAGCGGGTATCTTCAATCCTTGGTGCAATTAATTTTATTACAA  
CCATCATTAACATGAAACCTCCGACTATTTCCCAATATCAAACCCCTTTA  
TTCGTATGAGCTGTCTAATTACAGCCGTAATCTTCTTCTCTCATTACC  
TGTAATGCTGCTGGTATTACAATACTTTTAACTGACCGAAATTTAAATA  
CCACCTTCTTCGACCCAGCCGGAGGGGAGACCCAATTTTATATCAACAT  
TTATTC-----

-----



-----  
-----  
-----TTTCTGGAACGGAACCTCCACCCAATAACTGCCTTGG  
CATGTTGCTGCTGTCCGACGCCACCAGTGCACCAAGTTGTCTGAGCTTT  
CTTGGGGCATGTGCCCTCAGCAACTTTCCGGCCATTTGCAAACTGAGGAT  
TTCTCCAAGTCCCAAAGACATGGTGGTGCAGCTCCTGTCACACGAGGA  
GCTGGAGACCGAAGACGAGAGGCTGGTTTATGAAGCCGCCCTTAACTGGA  
TCAACTACGACCTAGAAAAGAGGCACTGCCACCTGCCCGAGCTCCTGAAA  
ACCGTCCGTCTGGCTCTCCTGCCTGCCATTTTTCTCATGGAAAATGTTTC  
CATGGAGGAGCTAATCAATGCCAGCCAAAAGCAAGGAGCTGGTGGACG  
AAGCTATCCGATGCAAATTGAAGATCCTGCAGAACGACGGCGTGGTCAAC  
AGTCCGTGCGCTCGGCCGAGAAAAACCAGCCATGCGCTCTTTCTTCTGGG  
CGGGCAAACATTCATGTGCGACAAGTTGTACCTGGTGGATCAAAAAGGCCA  
AAGAGATCATCCCCAAGGCGGACATACCCAGCCCCAGGAAGGAGTTTAGT  
GCCTGTGCCATCGGCTGCAAAGTGTACATCACTGGAGGGA--GAGGCTC-  
AGAGAATGGCGTATCCAAAGACGTCTGGGTCTACGACACAGTCCATGAGG  
AGTGGTCAAAAGCGGCGCCCATGCTCATCGCCAGGTTTGGCCATGGCTCC  
GCAGAGCTCAAACACTGCCTTTACGTCGTTGGAGGTCACACTGCAGCCAC  
TGGCTGCCTCCCGCCCTCGCCGTCTGGACGAATACATTGTTGTATTTCAGT  
CGTTCGACGACAAGGCTGATMCTGAATGAAGCTGAGCTGATAATGGCTCT  
AGCGCAAGAGTTTTCAGATGAGGGTGGTTACAGTATCTCTGGAGGAGCAGT  
CGCTCCCCAGCATCGTTCAGGTGATCAGCGGCGCCACCATGTTAGTCAGT  
ATGCACGGAGCTCAGCTCATCACCTCGCTCTTCCCTGCCAGGGGAGCCGT  
TGTGGTGCAGCTCTTCCCTTTGCGGTGAACCCAGAGCAATACACCCCAT  
ACAAAACCCTTACGTCCCTCCCAGGCATGGACCTTCACTACATTTCCCTGG  
AGAAACACACTGGAGGAAAATACAATCACCCATCCAGACAGACCTTGGGA  
GCAAGGGGGCATCGGCCACTTGGAGAAGGACGAGCAGGAGAGAATCCTGG  
CAAGCAGAGACGTCCCTCGGCACCTGTGCTGCCGCAACCCTGAATGGCTC  
TTCAGGATCTACCAGGACACTCTGGTGGACATTCCATCCTTCTTGGACGT  
CCTCAA---AGAGGGCTTAAAG---ACAAAGCCTGCTTTGAAAA---GT  
CAAAGCCAGCCAGTTCTCTACACCCGGGCAGAGTCAGAGAGCCTCAGTGC  
CAGACGTCGGTGCAGACCAGCAACGAGGCTAAACTCACAGTCTCCTGGCA  
GATCCCCTGGAATCTGAAATACCTAAAGGTGAGAGAGGTGAAGTACGAGG  
TGTGGATCCGGAAGAGGGACACCAGCAAGGGGACTCTGGAGGACCAGATC  
ATCCAGGCCAACC CGCCCTGGAGGCCTTCGGAAATGCCAAGACGCTGAG  
GAACGACAACCTCGTCCCGGTTTGGAAAATTCATCCGGATCCACTTTGGCA  
CCAGCGGCAAGTTGTCGTCAGCTGACATCGAGACGTACCTGCTGGAGAAG  
TCCC GCTCACCTTTCAGCTCAAGGCCGAGAGGAACTACCACATCTTCTA  
CCAGATCCTATCCAACCAGAAGCCGGAGCTGCTGGACCTGCTGCTGATCA  
CTAACAACCCCTACGACTACTCCTACATCTCCCAAGGCGAGGTGACGGTG  
GCCTCCATCAACGACGCCGAGGAGCTGCTGGCCACCGACAGCGCCTTCGA  
CGTGTGGGCTTACGGCTGATGAGAAGGCCGGGCTCTACAAGCTGACCG  
GCGCCATCATGCACTACGGCAACATGAAGTTCAAGCAGAAGCAGCGTGAG  
GAGCAAGCCGAGCCTGACGGGACCGAGGCCGCCGACAAATCGGCGTACCT  
GATGGGCCTGAACTCGGCCGACCTCATCAAGGGCTTGTGCCACCCGCGGG  
TTAAGGTGGGGAACGAGTACGTCACCAAAGGCCAGAGCGTGGACCAGGTC  
TACTAC-----  
-----  
-----  
-----  
-----  
-----

-----  
-----  
-----  
-----  
-----  
-----

-----NNNNNNNTCTACGCATCTTTCTCATTTCATGGGATG

TTTACAAATCAGTGACGGTTCAAATATTGTGAACCTGTTGTCTAGTAACT  
CTCCAAGTGTTCATATGCTTTGACCCAGCAAAAATATTTTCAGTAACTAC  
AGTCTGTATTGGGTTTTACATATACGAGCCTATTGAGTACTGGAATTC  
CACGGTGCAGGAGCACCTTAAGACTCTGAGTCATGGCTTCAACAAGATAT  
CCTGGATGGACAACCTTCTTCCACTACCTGAGGGTGGTAAATGTGAGCGCG  
TCAACCAAGAGTGACTTCATTACCATCCTCAAAGGGTCTTTCTTGCGCAG  
CCCAGAGTACCAACACTTCACTGAGGACATTATATTCTCCAAA---ACC  
GAGACTG-----ATGAATATGATATTATTGCCCTCTCGGATGTACTTG  
GTGGCTCGGACAACGGAGAAGAAGCGAGAAGAGGTAGTTGAGCTGTTGGA  
GAAGCTCCGACCACTAATGCTGATAAACAGCATCAAGTTCATTGCTTTCA  
ACCTACTTTTTGTCTTCATGGACCGCTACAGCTCCTCTGTCATTTTCGCCT  
ATCCTGACCTCAGGATTCAGTGTACTAACAATCCTTATTCTCACTTTCTT  
CCTGGTCATCAACCCCTGGGAAACTTTTTGGCTCATTCTAACTGTAACAT  
CTGTGGAGTTGGGCGTATTGGGTTTGATGGGTTTTACCAGTTTGAATGG  
CAGCCAGCTCTCAAGAATGTGTCCCGTCTGCGGCGTGGGCATCATTA  
TGGACTGGCTGGATGCTCTTCCACCGTGGACGACTCGCCCGCTGACACCA  
TCACTCGCCGCTTTCGCTACGACGTGGCGCTGGTGTGCGCTTTAAAGGAC  
CTGGAGGAAGACATCGTGGACGGGCTGAGAGAGAACGAGATGGATGACAG  
CGCTCCACGTCAGGCTTCAGCGTCATGATCAAAGAGTCTGTGACGGCA  
TGGGGGACGTCAGCGAGAAGCACGGCGGAGGGCCGCTCGTTCCGGAGAAG  
GTTGTGCGCTTCTCTTTCACTATCATGTCTGTCTCCATCCTGGCGGAAG  
GAAAGAG-----GGCAAAGTCACCA  
TCTACACAGAGCCAAAGCCAAACTCGGAGCTGTCTGCAAGCCCCGTGTC  
CTGATGTCCGTCGATGAGTCTGACCACGAGACGCTCTCCGCCATCCTGAG  
GCCCATCATTGCAGAGCGCAAAGCAATGAAAGAGAGCCGCCTCATCCTGT  
CCATCGGTGGGCTGCCGCGCTCCTTCCGCTTTCACTTCAGAGGCACAGGG  
TACGACGAGAAGATGGTGCGGGAGATGGAGGGTCTCGAGGGCTCTGGCTC  
CACCTACATTTGCACGCTCTGCGATTCAGTCGCTGGAGGCCTCTCAGA  
ACATGGTGCTGCATTCGTCACCCGCAGCCACGAGGAGAACCTGGAACGT  
TACGAAACATGGCGAAGCAACCCCTTCTCCGAGTCTGCGGATGAGCTGCG  
GGAACGGGTCAAAGGGGTCTCCGCCAAGCCCTTCATGGAACGCATCCCA  
CGCTTGATGCCCTGCACTGCGACATAGGCAACGCCACTGAGTTTTACAAA  
ATCTTCCAGGATGAGATCGGTGAGATGTACAAAAAGGT---CAGC---GC  
CAGCCGGGAGGAGCGGCGCAGCTGGAGGGCAGCCCTGGATAAACAGCTGA  
GGAAGAAGATGAAGCTCAAACCGGTGATGAGGATGAATGGGAACTACGCC  
CGCCGGCTAATGACCCTGGAGGCTGCGGAGGTGGTGTGTGAGCTGGTGCC  
CTCCGAGGAGAGGAGGGAGGTCTGAGGGAGCTGATGAGGCTCTATCTCC  
AGATGAAGCCTGTGTGGCGGGCAACCTGCCCGGCAAGGAGTGCCCTGAC  
CAGCTGTGCCGCTACAGCTTCAACTCTCAGCGCTTCGCCGACCTCCTCTC  
CTCCAACTTGAAATACAGGTACAACGGGAAGATAACCAACTACCTGCACA  
AGACCTGGCGCACGTGCCCGAAATCATCGAGAGGGACGGATCGATGGG  
GCCTGGGCCAGCGAGGGAAACGAGTCAGNNNNNNNNNNNNNNNNNNNNNNNN  
GCTGGAAGGAGAGTC  
CTCAGCCTTTGTCTGCTCCGTGGAGGACCCACCAAGCAAACCAAGTTC  
AAGGGCATCAAAACCTACATCTCGTACCGGGTACCCCCAGCCACACTGG  
CCGGCCCGTCTACCGCCGCTACAAACACTTTGACTGGCTGTACAACCGTC



TGCGTCTTCCAACGTGGTCAACAGCCAGATGCGGCTGGGCTTCTCGGGG  
ACATGTACGGACGAGCCGACCAGTACGGCCACGTTACCAGCCCAGCGT--  
-CCGACCACTATGCATCGACCCAGCTGCACGGCTACGGCCCCATGAACAT  
GAATATGGCCGCG---CACCACGGAGCAGGGCCTTCTTTTCGATACATGA  
GGCAGCCGATCAAGCAAGAGCTCATCTGCAAGTGGATCGAGCCGGAGCAG  
CTGTCAAATCCCAAAAAGTCTGTGCAACAAAATTTTAGCACGATGCACGA  
GCTGGTGACCCATCTGACGGTGGAGCATGTGGGGGACCGGAGCAGACCA  
ACCACATCTGCTTCTGGGAGGAGTGTCCCGAGAAGGAAAGCCATTCAA  
GCCAAATACAACTNNNNNNNNNNNNNNNNNNNNNNNNNNNNNNNNNNNNNN  
NNNNNNNNNNNN

>Capros aper

AGTTTACTTATTTCGGGCCGAACCTAAGCCAACCTGGCGCCCTCTTAGGCGA  
CGATCAAATTTACAACGTGATCGTTACGGCCCATGCCTTTGTAATAATTT  
TTTTTATAGTAATACCCATTATAATTGGGGGCTTTGGAAATTGACTTATT  
CCGTTGATAATCGGGGCCCGGATATGGCCTTCCCTCGAATAAAATAACAT  
AAGCTTTTGGCTCCTCCCACCCTCCTTTCTCCTCCTCCTTGCCTCTTCAG  
GTGTAGAGGCAGGTGCGGGAACAGGTTGAACAGTTTATCCCCCTCTGGCC  
GGCAACTTAGCCCACGCCGGGCATCCGTCGATTTAACTATTTTTTCTCT  
ACATTTAGCAGGAATCTCCTCTATCCTTGGGGCCATCAACTTTATTACAA  
CAATTATTAATAAAAACCCCTGCAATTTCCCAATACCAGACCCCGCTT  
TTTGTATGAGCCGTTTTAATTACAGCTGTTCTGCTTCTCCTATCCCTCCC  
TGTCCTCGCCGCCGGGATTACAATGCTTCTAACAGACCGAAACCTAAATA  
CTACTTTCTTTGACCCGGCAGGAGGGGATCCCATTTCTTTATCAACAC  
CTC-----  
-----  
-----  
-----  
-----

NNNNNNNNNNNNNNNNNNNNNNNNNNNNNNNNNNNNNNNNNNNNNGCTGTTGCTGTCTGATGCCACCAGTGCA  
CCAAGCTGT

CAGAGCTCTCCTGGGGCATGTGCCTCAGCAACTTCCCGCTATCTGCAAG  
ACCGAGGACTTCCCTCAACTGCCCAAAGATATGGTGGTGCAGCTTTTGT  
ACACGAGGAGCTAGAGACCGAGGATGAGAGACTGGTTTATGAGGCTGCC  
TCAATTGGATCAACTATGACCTGGATAAGAGGCACTCTCACCTGCCGGAG  
CTGCTGAGGACGGTTCGCCTGGCCCTACTGCCCGCCATCTTTCTCATGGA  
GAACGTTTCTACGGAAGAGCTGATCAACGCCCAAGGCAAGAGCAAGGAGC  
TGGTGGACGAGGCTATCCGCTGCAAGCTGAAGATCCTGCAGAATGATGGC  
GTTGTTAACAGCCCGTGTGCTCGGCCAAGAAAACAGCCATGCCCTCTT  
TCTCCTCGGCGGGCAGACCTTCATGTGCGACAAGTTGTACCTGGTGGACC  
AGAAAGCCAAAGAGATCATCCCCAAAGCTGACATTCAGCCCAAGGAAG  
GAGTTTAGCGCCTGCGCCATCGGCTGCAAGGTGTATATCACTGGCGGGA-  
-GGGGCTC-GGAGAACGGCGTCTCCAAAGATGTGTGGGTCTACGACACCG  
TCCACGAGGAATGGTCAAAGGCGGCGCCCATGCTCATCGCCAGGTTTGGC  
CACGGTTCTGCTGAGCTTAAACTGCCTGTACGTGGTGGGAGGTCACAC  
CGCCGCAACTGGCTGCCCTCCCGNNNNNNNNNNNTGACAATTACATGTTGTGTTAGTCGT  
TCAACAACGAGGCTAATACTGAATGAACCAGAGCTTATCATGGCCCTGGT  
CCAGGAGTTCAGATGAGAGTAGTCACTGTATCCCTGGAGGAGCAGTCTC  
TCCCCAGCATCGTCCAGGTGATCAGCGGAGCTGCCATGTTGGTCAGCATG  
CATGGAGCTCAGCTCATCACCTCACTCTTCCCTCCCCAGAGGAGCTGCTGT  
GGTGGAGCTGTTCCCTTTGCTGTGAACCCAGAGCAGTATACCCCATATA  
AAACCTGGCCTCCCTTCCAGGCATGGACCTTCACTACATATCCTGGAGG  
AACACGAAGGAGGAGAACACCGTCCGCCACCCAGACAGACCCTGGGAACA  
AGGAGGCATCACTCACCTGGAGAAGGAGGAGCAAGAGCGAATATTGGCGA

GCAAAGATGTCCCAAGGCACCTGTGCTGCCGCAACCCAGAGTGGCTTTTC  
CGGATCTACCAGGACACTTTGGTGGACATCCCTTCCTTCCCTGGAAGTCCT  
CAA---AGAGGGCATGAAG---ACAAAGCCCAGCTTGAAGAA---GTCAA  
AGCCGGCCAGCACACTTCACCCGGCCGGGTGAGAGAACCTCAGTGTCAG  
ACCTCAGTACAAACCACTAATGAGGCTAAACTCACAGTCTCCTGGCAGAT  
CCCCTGGAATTTAAAATACCTGAAGGTGAGAGAGGTCAAATACGAAGTG-  
-----AAAAAAGACACGAGCAAGGGGACGCTGGAGGATCAAATCATC  
CAGGCCAACCCGGCGCTGGAGGCCCTTCGGAAACGCCAAAACCCTGAGGAA  
CGACAACCTCGTCTCGCTTTGGGAAATTCATCCGAATCCACTTTGGTACCA  
GCGGGAAGTTGTGCTGCTGACATCGAGACGTACCTGCTGGAGAAGTCA  
CGTGTCACCTTTCAGCTCAAGGCTGAGAGGAACTACCACATCTTCTACCA  
GATCCTGTCCAATCAGAAGCCAGAGCTGCTGGACATGCTGCTGATCACCA  
ACAACCCCTATGACTACTCCTACATCTCCAAGGAGAGGTGACCGTCGCC  
TCCATCAACGACTCAGAGGAGCTGATGGCCACAGACAGCGCCTTCGACGT  
GCTGGGCTTCACTCCGGACGAGAAGATGGGCGTCTACAAACTGACGGGCG  
CCATCATGCACTACGGAACATGAAGTTCAAACAGAAGCAGCGGGAGGAG  
CAGGCTGAGTCGGATGGGACCGAGTCTGCGGATAAATCGGCCTACCTCAT  
GGGGCTGAACTCTGCAGACCTCATCAAGGGGCTCTGCCACCCAGAGTCA  
AGGTGGGAAACGAATATGTGACCAAAGGCCAAAGTGTGGATCAAGTCTAC  
TANNNNNNNNNNNNNNNNNNNNNNNNNNNNNNNNNNNNNNGGAAGCACTACAACACCAAGCTGGGATATAAGC  
GCCATGTGGCCATGC  
ACTCAGCCACGGCAGGGGATCTCACCTGTAAAGTGTGCATGCAGACCTAT  
GAGAGCACGCCCGTGCTGTTGGAACACCTCAAGAGTCACTCTGGGAAGTC  
CTCAGGTGGCACCAAGGAGAAAAAACCCATGCGACCACTGTGATCGGC  
GTTTCTACACACGAAAGGATGTGAGCGGCATATGGTGGTCCACACAGGC  
AGAAAGGACTTCCCTGTGCCAGTACTGTGCCAACGCTTTGGCAGGAAGGA  
CCATCTGACGCGCCATGTGAAGAAGAGCCACTCGCAGGAGCTGCTGAAAA  
TCAAGACGGAGCCACCCGATATGTTAGGTCTTTTAGCTTCAGGGTCACCA  
CCGTGCTCTGTGAAGGAGGAGCTCAGCCCCATGATGTGCGGCATGGGTCC  
CAACAAAGACCCCATGATGGGTAAACCATTCCCCAGTGGGGCTCCTTTTTC  
CCATGGGCATGTATAACCCACCCT-----CTCCAGGCCATGTCTAAT  
TCTGGGATGGGTACCCA-----CACCCGTCCCTGATGCCCAGTTCCTT  
GTCAGC-----  
NNNNNNNNNNNNNNNNNNNNNNNNNNNNNNNNNNNNNNNNNNNNNNNNNNNNNNNNNNNNNNGGTGAATC  
TGCTGGCTAGTAACTCTCCAAGTGTATCATATG  
CTCTCACCAACAAAAGTACTTCACTAGTAACTACAGCCCTGTGATTGGGTTT  
TACATTTATGAGCCCATCGAGTACTGGAACCAACAGTGCAGGAGCACCT  
GAAGACTCTGAGTCATGGCTTCAAACAAGATTTCCCTGGATGGACAACTTTT  
TCCACTACCTGCGGGTGGTGAATGTGAGCGCGTCTACCAAGAGTGACTTC  
ATCACCATCCTCAAGGGCTCCTTCTACGCAGCCCGAGTACCAGCACTT  
CAATGAAGACATCATATTCTCCAAGA---ACCACGAGACTG-----ACG  
AGTACGACATTATCGTCTCACGGATGTACTTAGTGGCAGGACGACAGAG  
AAGAAGCGCAAGAAGTGGTGGAGCTTTTGGAAAAGCTTCGTCCATTGAT  
GCTGATTAACAGCATCAAGTTCATGCTTCAATCCTACGTTTGTTTCA  
TGGACCGCTACAGCTCCTCTGTTCATCTCGCCCATCTGACCTCAGGATTC  
AGCGTGCTCACAATCCTCATCCTCACTTCTTCTGCTCATCAACCCCTT  
GGGAACTTCTGNNNNNNNNNNNNNNNNNNNNNNNNNNNNNNNNNNNNNNNNNNNNNNNNNNNNNNNN  
NNNNNNNNNNNNNNNNNNNNNNNNNNNNNNNNNNNNNNNNNNNNNNNNNNNNNNNNNNNNNNNNNN  
CGGGCTCT  
CGGGATGGACGTCCTCATTGGATGACGCCC  
CCGCTGACACCATCACTCGACGTTTCGCTATGATGTGGCACTGGTGTGCG  
GCATTAAGGATCTGGAGGAGGACATCATGGAAGGGCTGAGAGAAAGTGG  
GATGGAAGACAGCGCTTGCACCTCCGGCTTTAGTGTGATCATGATCAAGGAGT  
CTTGTGACGGCATGGGTGATGTGAGTGTGAGAAACACGGTGGAGGACCTGCT

ATTCTGAGAAGGCTGTGCGCTTCTCCTTCACCGTTATGTCTATCTCTGT  
CCTGGCTGAAGATGCAGAA-----A  
AACCAGTTACCATCTTCACTGAGCCGAAACCAAACCTCAGAGCTGTCCTGT  
AAGCCCCTTTGCGTGTGTGTTGTTGGATGAGTCAGACCACGAGACACTCAC  
AGCCATCCTGTGGCTGTAATTGCAGAGCGCAACGCAATGACAGAGAGCC  
GGCTCATCGTATCCATCGGTGGACTGCCTCGCTCCTTCCGCTTTCCTTC  
AGAGGTACGGGATACGATGAGAAGATGGTGCCTGAGGTGGAGGGCCTCGA  
GGCTTCTGGATCCAGCTATGTCTGCACTCTGTGCGACTCGAGTCGGGCGG  
AGGCCTCTCAAAACATGGTGCTACACTCCATCACCCGCAGTCACGAAGAG  
AACCTAGATCGCTACGAGATATGGAGAACCAACCCCTTTTCTGAGTCTGC  
AGATGAACTGCGAGACAGAGTCAAAGGGGTCTCTGCGAAGCCCTTCATGG  
AGACCCATCCCACGCTGGACGCTTTACTACTGCGACATAGGCAATGCCACA  
GAGTTCTACAAAATCTTCCAGGATGAGATCGGGGAGGTGTTCCAAAAGGT  
---CAAC---CCGACTCGGGAGGAACGGCGCAGCTGGAGGGCCGCCCTAG  
ATAAACAGCTGAGGAAGAAGATGAAGCTCAAACCGATAATGAGGATGAAT  
GGGAACTATGCCCGCCGGCTAATGACCCTGGAGGCTGTGGAGGTGGTGTG  
CGAGCTGGTGCCTCAGAGGATAGGAGGGTGGCCCTGAGGGAGCTCATGA  
GGCTCTACCTCCAGATGAAGCCCGTGTGGCGCGCCACCTGCCCTGCCAAA  
GAATGCCCGACCAGCTGTGCCGCTACAGCTTTAACTCTCAACACTTCGC  
TGACCTCCTCTCCTCGACCTTCAAATATAGGTACAATGGAAAGATAACCA  
ATTACCTGCACAAGACCCTGGCCCATGTGCCTGAAATCATAGAGAGAGAT  
GGATCCATCGGAGCGTGGGCCAGCGAGGGGAACGAGTCGGCAAACAAA--

-----  
-----  
-----  
-----  
-----  
-----  
-----  
-----  
-----  
-----  
-----  
-----  
-----  
-----  
-----

-----  
NNNNNNNNNNNNNNNNNNNNNNNNNNNNNNNNNNNNNNNNNNNNNNNNNNNNNNNNNNNNNNNNNNNNNNNNNNNNNNNNNNNNNNNNNN  
NNNNNNNNNNNNNNNNNNNNNNNNNNNNNNNNNNNNNNNNNNNNNNNNNNNNNNNNNNNNNNNNNNNNNNNNNNNNNNNNNNNNNNNNNN  
NNNNNNNNNNNNNNNNNNNNNNNNNNNNNNNNNNNNNNNNNNNNNNNNNNNNNNNNNNNNNNNNNNNNNNNNNNNNNNNNNNNNNNNNNN  
NNNNNNNNNNNNNNNNNNNNNNNNNNNNNNNNNNNNNNNNNNNNNNNNNNNNNNNNNNNNNNNNNNNNNNNNNNNNNNNNNNNNNNNNNN  
NNNNNNCTTCTGTGTGTCAGTGTACGCGCTATCTGGCCATCGCACATCACCGT  
TTCTACACCAAGAGGCTGACCTTCTGGACCTGTCTAGCTGTCTATCTGCAT  
GGTGTGGACGTTGTCAGTGGCTATGGCGTTCCCAGCTGCTAGACGCTAG  
GGACGTAATCTTTATCCGGGAGGAGGACCGTGCACATTCACGACCGT  
TCCTTCAGGGCGAATGATTGCGTGGGCTTTCATGCTCCCTGCTGGGCGTCAT  
CCTCCTGGCCACACAGCTGGTTTACCTCAAGCTCATCTTCTTCCGTTCCAG  
ACCGTCGAAAAATGAAGCCTGTCCAGTTCGTGCCTGCCGTGAGCCAGAAC  
TGGACCTTCCATGGACCAGGCAGCCAGCGGGCAGGCGGCAAGCAACTGACT  
GGCAGGATTCGGTTCGACGCCCCACCCGCCTACTCTGCTGGGCAATCCGGC  
ATAACAGCAACGCACCAGGTGCAAGCATCTACTGGTATTGGATGAGTTC  
AAAACAAAGAACAGGATTAGTACGATGTTCTACATCATGACTTTTTTCTT  
CCTGGCACTGTGGGGGCCCTACCTGGTGCCTGCTACTGGCGCGTGTTCG



CCTGGGGCATGTGCCTCAGCAACTTCCCTGCTATTTGCAAGACAGAGGAC  
TTCTCCAAGTGCACAAAGATATGGTGTATCCAGCTTTTATCTCATGAGGA  
GCTAGAGACAGAGGATGAGAGACTGGTGTATGAAGCTGCCCTTAAGTGA  
TCAACTATGACCTGGAGAGAAGGCACAGCCACTTCCAGAGCTTCTGAGA  
ACGGTCCGCCTTGCCCTGCTGCCTGCCATCTTTCTGATGGAGAACGTCTC  
AACAGAGGAGCTGATCAATGCCAGGCCAAGAGCAAGGAACTGGTAGATG  
AAGCCATCCGCTGTAAGCTGAAAAATCCTGCAGAATGATGGCGTTGTTAAC  
AGCCCATGTGCTCGACCTAGAAAAACCAGCCATGCCCTGTTTCTTTTGGG  
AGGGCAGACTTTCATGTGTGACAAGTTGTATCTGGTGGACCAGAAGGCCA  
AAGAAATCATCCCCAAGGCAGACATCCCCAGCCCCAGGAAGGAGTTCAGC  
GCCTGCGCCATCGGCTGTAAGGTCTACATCACTGGAGGGA--GAGGCTC-  
AGAGAAATGGTGTGTCCAAAGATGTATGGGTTTACGACACTGTCCACGAGG  
AATGGTCCAAAGCAGCTCCCATGCTCATTGCMAGGTTTGGCCATGGCTCC  
GCAGAGCTGAAACACTGCCTCTACGTGGTAGGAGGTCACACTGCAGCAAC  
TGGCTGCCTCCCGGCTTCTCCATCAGGATGATTACATTGTTGTGTTTCACT  
CGCTCATCAACAAGGCTGATACTTAATGAGGCTGAGCTAATCATGATGCT  
GGCCAGGAGTTCCAGATGAGAGTGGTCCAGTGTCCCTGGAGGAACAGT  
CTTTTCCCAGTATTGTCCAGGTCATCAGTGGTGCATCTATGTTAGTCAGC  
ATGCATGGAGCTCAGCTCATAACCTCACTCTTCCCTCCCCACAGGAGCTAC  
TGTGGTGGAACTGTTCCCTTTGCTGTGAACCCAGACCATTACACCCCAT  
ATAAACTCTGGCCTCACTACCAGGCATCGACCTTCACTATATCTCTTGG  
AGGAACACTAATGAGGAAAACACCATCACCACCCAGACAGACTCTGGGA  
ACAAGGAGGTATTGTTCACTTGGAAAAGGAGGAACAGGAGCGGATACTGG  
CAAGTAAGGACGTCCCCAGGCACCTCTGCTGCCGCAACCCTGAGTGGCTC  
TTCCGGATCTACCAGGACACTTTAGTGGACATCCCTTCCCTTCCCTGGAAGC  
CCTCAA---AGAGGGCATGAAG---ATGAAACCCAGCTTGAAGAA---GT  
CAAAGCCAGCCAACATGGTCCACCCAGGCCGAGTCAGAGAACCCAGTGT  
CAAACCTCAGTACAACTACTCACGAAGCCAACTTACAGTGTCTTGGCA  
GATCCCATGGAATCTTAAAGTACCTGAAGGTGAGAGAAGTAAAGTATGAGG  
TGTGGATCCAGAAAAAGACACCAGCAAGGGGACGCTGGAGGATCAGATC  
ATCCAGGCGAACCTTGCACTTGGAGCCTTTCGGCAAAGCCAAAACACTGAG  
AAATGACAACCTCGTCTCGCTTTGGAAAATTCATCCGAATTCACTTTGGTA  
CAAGTGGCAAACCTGTCTGCGGACATCGAGACCTACCTTCTGGAGAAG  
TCACGTGTCACCTTCCAGCTAAAGGCTGAGAGAAAACACCACATCTTCTA  
CCAGATCCTGTCCAATCAGAAGCCAGAGCTGCTGGACATGCTGCTGATCA  
CCAACAACCCATATGACTACTCCTACATCTCGCAAGGAGAGGTAACAGTT  
GCCTCCATCAACGACTCAGAGGAGCTGATGGCCACTGACAGTGCCTTTGA  
TGTGCTTGGCTTCACTGCAGAGGAGAAGATGGCCGTCTACAACTGACTG  
GCGCCATCATGCACCATGGCAACATGAAATTCAAAACAGAAGCAACGTGAG  
GAGCAGGCTGAACCTGATGGGACTGAAGCTGCTGATAAGTCTGCTTATCT  
CATGGGACTGAACCTGCTGACCTCATCAAAGGCTGTGTACCCCTAGAG  
TCAAAGGTAGGAAATGAGTACGTCACTAAAGGCCAAAGTGTGGACCAAGTC  
TACTATCCCAACAAGGAAGCCTTTAAGTGTGAAGAGTGTGGGAAGCACTA  
CAACACCCAGCTGGGATATAAGCGTCATGTGGCCATGCACTCCGCCACGT  
CTGGGGATCTCACCTGTAAAGTGTGCATGCAGAGCTACGAGAGCACACCT  
ATTCTCCTGGAGCACCTCAAGAGCCACTCTGGGAAGTCTTTCGGGTGGCAC  
CAAGGAGAAGAAGCACCCGTGCGACCACTGTGACCCGACGTTTCTACACAC  
GGAAGGATGTGAGACGACACATGGTGGTCCACACGGGCGAAAGGACTTC  
CTGTGCCAGTACTGTGCCAGCGTTTCGGCAGGAAGGACCACCTGACACG  
CCACGTAAAGAAGAGCCACTCACAGGAGCTGCTGAAGATCAAGACGGAGC  
CTCCAGAYATGTTAGGTCTTTTAGCCTCAGGATCACACCTTGTCTGTG  
AAGGAGGAGCTCAGCCCCATGATGTGCGGCATGGGTCCCAACAAAGACCC  
TATGATGGGCAAACCGTTCCCCAGTGGGGCCCTTTTCCAATGGGCATGT



ACAACCCCCACCAT-----CTACAGGCGATGTCTAATACTGGGGTGGGT  
CACCCG-----CACCCGCCCTAATGCCAGTTCTTTGTCTGCAGCTAT  
GGGCATGGGCTGTACATGGAATATCTCATCTACGCCTCTTTTTCATTCA  
TGGGATGTTTACAAATCAGTGATGGGTCAAATATTGTCAACCTGCTGGCT  
AGTAACTCTCCAAGTGTTCCTATGCTCTGACTCAGCAGAAATATTTTCAG  
TAACTACAGCCCTGTGATCGGGTTTACATTTATGAGCCCATCGAGTACT  
GGAACCTCCACGGTGCAGGAGCACCTGAAGACCCTTAGTCATGGCTTCAAC  
AAGATCTCCTGGATGGACAACCTTTTCCACTACCTACGTGTGGTCAACGT  
GAGCGCGTCAACTAAAAGCGACTTCATCACCATCCTCAAAGGTTTCGTTCC  
TGCGCAGCCAGAGTACCAGCACTTCACCGAGGACATCATATTTCTCCAAG  
A---ACCGCGAGACTG-----ATGAATATGACATCATTGCCTCACGGAT  
GTACTTGGTGGCGGGACAACCTGAGAAGAAGCGGAGGAGGTGGTGGAGC  
TTCTGGAGAAGCTTCGTCCATTGATGCTAATCAACAGCATCAAGTTCATT  
GCCTTCAATCCTACGTTTGTGTTTCATGGACCGCTACAGCTCCTCAGTCAT  
CTCGCCCATCCTGACCTCAGGCTTCAGCGTACTCACTATCCTCATCCTCA  
CTTTCTTCCCTGGTCATCAACCCCTTGGGAAACTTCTGGCTCATCCTCACG  
GTCACGTCCGTGGAGCTGGGCGTCTTGGGTTTGATGGGCTTTCACCAGTT  
TGAATGGCAGCCAGCTCTCAAGAATGTGTCACCATCTTGCAATGTTGGCA  
TTATTAATGGTCTCTCTGGATGGGCTTCCTCAGTGGATGACTCCCCGGCT  
GACACCATCACTCGGCGCTTTCGCTATGATGTGGCACTGGTGTGAGCATT  
AAAGGATCTGGAGGAGGACATCATGGAGGGACTGAGAGAGAAAAGAAATGG  
AAGACAGTGCTTGCACCTCAGGCTTTACTGTCATGATCAAGGAATGTTGT  
GATGGCATGGGCGATGTCAGCGAGAAGCACGGCGGAGGACCAGCTGTTCC  
TGAGAAAGCTGTACGTTTCTCCTTCACTGTTATGTCTGTCTCCGTCCTGA  
CAGAGG---AGGGG-----GAGGAG  
GTTACTATCTTACCAGAAACAAGGCCAAACTCAGAGCTGTCCTGTAAGCC  
CCTGTGCTTGATGTTTGTGGATGAGTCAGACCACGAGACACTCACAGCTC  
TCCTGGGGCCTGTGGTTGCAGAGCGCAATGCAATGAAAGAGAGCAGGCTC  
ATCCTATCCATAGGTGGCCTCTCTCGCTCCTTCCGCTTCCACTTCAGAGG  
CACCGGATAYGATGAGAAGATGGTGCAGAGACATGGAAGGTCTGGAGTCCT  
CGGGGTCCACGTACGCTCTGCACCCCTGTGTGACTCCAGTCGGGCCGAGGCC  
TCTCAAACATGGTGCTACACTCCGTCACTCGCAGTCATACGGAGAACCT  
AGAACGGTATGAAATATGGAGAACAACCCTTTCTCCGAGTCAGCAGACG  
AACTGCGAGACAGAGTCAAAGGGGTCTCTGCAAAGCCCTTCATGGAGACC  
CAGCCCACAATTGATGCATTACACTGTGACATCGGCAATGCCACTGAGTT  
CTACAAAATCTTCCAGGACGAGATTGGGGAGGTGTATAAGAAGGT---CA  
AC---CCCAGCCGGGAGGAGAGGCGCAGCTGGAGGGCAGCCCTAGATAAA  
CAGCTGAGGAAGAAGATGAAGCTTAAACCGGTAATGAGGATGAATGGTAA  
CTACGCCCCGAGGCTAATGACCCTAGAGACTGTGGAGGTTGTGTGTGAAC  
TGGTGGCCTCAGAGGAGAGGAAAGAGGCCCTGAGGGAGCTCATGAGGCTC  
TATCTCAGATGAGGCCGTGTGTGGCGGCCACCTGCCAGCCAAGGAATG  
CCCCGACCAGCTGTGCCGCTACAGCTTCAACTCCCAGCACTTTGCTGACC  
TCCTGTCTCTACCTTCAAATATAGGTACAATGGAAAGATAACCAATTAC  
CTTCAAGACTTTGGCCCATGTGCCGTAATCATAGAGAGAGATGGATC  
CATAGGCGCCTGGGCCAGTGAGGGGAACGAGTCGGCAAACAAATCCTACA  
CCATTGAGATGGGTCCCTTGGGGCCCAAGTGGAAAGGAGAACCCGCAACCT  
TTCTCCTGCTCCATCGAAGACCCCAAAAACAGACAAAGTTCAAGGGCAT  
CAAGACCTACATTTACATACCGGGTGACGCCGAGCCACATAGGACGCCAG  
TCTACAGGCGCTACAAACACTTTGACTGGCTGTACAACCGCTTACTGCAC  
AAGTTCACTGTGATCTCTGTGCCCCATCTGCCCCGAGAAGCAGGCCACGGG  
GCGGTTTGAGGAAGACTTCATTGAGAAGCGTAAGAGACGACTGATACTGT  
GGATGAACCACATGACCAGTCAACCAGTCTCTCCAGTATGAAGGCTTT  
GAGCACTTTCTGATGTGTGCTGATGACAAGCAGTGGAACCTGGGAAAGAG

















TGGTTAAAGACAAGAGCCTGCACCGCGGCCCTACTACTTCCTGCTGGAC  
CTGTGCGCCTCTGACATCCTGCGTTCGTCTATCTGCTTCCCCTTTGTCTT  
CACCTCTGTCAAGAATGGATCTGTCTGGACCTACGGCAGCTCACCTGCA  
AAGTGATCGCCTTCTGGGCGTGCTCCTGTTCCACACAGCGTTCATG  
CTATTTTGTGTGACGCTGACCCGCTATCTGGCCATCGCACATCACCGTTT  
CTACACTAAGAGGCTGACCTTCTGGACCTGTCTGGCTGTCATCTGCATGG  
TGTGGACGTTATCAGTGGCMATGGCTTTCCCACCGGTGCTAGACGTAGGG  
ACGTACTCTTTTATCCAGGAGGAGGACCAGTGCACATTCAGCACCATTC  
CTTCAGGGCGAACGACTCCCTGGGCTTCATGCTCCTGCTGGCACTCATCC  
TCCTGGCCACACAGCTGGTTTACCTCAAGCTCATCTTCTTCGTCACGAC  
CGTCGGAAGATGAAGCCTGTCCAGTTCGTGCCTGCTGTCAGCCAGAACTG  
GACCTTCCACGGGCCAGGGGCCAGCGGGCAGGCGGGCCAACTGGCTGG  
CTGGATTTGGTAGAGGTCCCACACCTCCTACTTTACTGGGCATCCGGCAG  
AACAGCAATGCAGCAGGCCGAGGCGTCTACTGGTGCTGGATGAATTCAA  
AACAGAGAAGAGGATTAGCAGGATGTTCTACATCATGACGTTTTTCTTCC  
TGGCACTGTGGGGCCGTATCTGGTAGCCTGCTACTGGAGGGTGTTTGCA  
AGGGGCCCTGTAGTCCCCTGTGGGCTACCTGACAGCAGCCGTGTGGATGAG  
CTTTGCCCAGGCAGGGGTCAATCCTTTCATCTGCATCTTCTCCAACAGGG  
AGGCCAAATCTCGCTTTCACCCTGGCGTGGGGACTGCGCCTGGCACGGAG  
C---GCAGCGTCCCCTCGGCAACAGCTTGCTATCCCCACAGCAAACCTGA  
GGAGCCCCTGTTGCCACCCCCCGCAGCGATGGTTTGTACCC---CTG  
CCAACAACCGACTGGACTTTTGTGCTCGGCATACGACGCGGCT-----  
---GATTTCCGCGGTAACGCGGCCACCTTGTCTTACGCAGCGGCCGG  
AGTGAAGGCTC-----TTCCCCTGCCGGCCGAGGCTGCTCCAACCGAC  
CTCTTGGCTATTACGCTGACCCGTCGG---GCTGG---GGAGGGCGCACG  
CCGCCGAGTACTGTGGTGTAAATAGTAAATCCAGCTCGGTCTTTTCCTG  
CTGGCCCCTAATCTATCGGGGGCAGAGCAGGCG---CC---CACTACC  
TGG-----CCGAGGA---GGGA---GACTC---CGTCCCCACGGAG  
AGGTCACCG---AT---CAGCGCTCCGAGGAG---ACCAAACCAAGGA  
CAT-----ATCAGA---GTCGAGCTGGATAGAG---ACACCTTCTCCA  
TTAAGTCCATCGATTCAAGCGATTCTGGGATCTTTG---AACAGGCCAAA  
AGGAGAAGAATCTCACCTTCTGCCACGCCG-----GTTTCAGAGGC  
AGTGTCCCCGTTANNNNNNNNNNCACTCAACAGGCGAAGTCACAGAGAGAGAAGTGG  
CTTTGGGGATAAATCCTTTTCGCGGACGGGATGGGCGCCTTCAAAATAAAC  
CACAGCTCCCATGATATTGGCTCCGG---ACAAACGGCGTTTTCTCTCA  
GGCG---CCCGGCTAC---GCAGCAGCAGCCCTGGGA---CACCATCA--  
----CCACCCGACCCACGTTGGCTCT---TACTCCACGGCGGCTTTCAAC  
TCCACCAGGGACTTCTCTTTCAGAAATCGGGGTTTGGAGACGCCACCGG  
-----GGCGCAGCACAGTTTGTTCGCCTC-----CGGAA  
GTTT---C-----GCAGGGCCACATGGACACTCAGATGCAACGGGGCAC  
CTGCTCTTCCCAGGGCTCCACGAG---CAAGCAGCGAGCCATGCGTCTTC  
CAACGTGGTCAACAGCCAGATGCGACTGGGCTTCTCGGGGGACATGTACG  
GTCGGGCCGATCAGTACGGCCACGTTACAAGCCCGAGGT---CCGACCAC  
TATGCTTCGACCCAGTTGCACGGTTATGGCCCCATGAACATGAATATGGC  
CGCA---CACCACGGAGCAGGGGCCCTTCTTTCGATACATGAGGCAGCCGA  
TCAAACAAGAGCTTATCTGCAAGTGGATCGAGCCGGAGCAGCTGACAAAT  
CCAAAAAGTCTTGAACAAAACCTTTTAGCACGATGCATGAGCTTGTGAC  
CCACCTGACGGTGGAGCATGTGGGGGGACCAGAGCAGTCCAACCACATCT  
GCTTCTGGGAAGAGTGCCCCAGAGAAGGAAAACCAATCAAAGCCAAATAC  
AAACTTGTAATCATATCAGAGTACACACCGGAGAAAAACCTTTCCGTG  
TCCGTTCCCAGGCTGTGGCAA  
>Centropomus undecimalis  
AGCCTACTCATTTCGAGCGGAACCTTAGTCAACCTGGCGCCCTACTAGGAGA

CGACCAAATTTACAATGTTATTGTACGGCACACGCCTTCGTAATAATTT  
TCTTCATAGTGATGCCAATCATAATTGGAGGCTTCGGAAACTGACTCATC  
CCTCTAATAATTGGAGCTCCAGACATGGCATTTCCTCCGAATAAATAATAT  
AAGCTTCTGACTTCTCCCTCCTTCTCCTGCTACTTCTAGCCTCCTCTG  
GAGTAGAAGCCGGTGCCGGAACAGGATGAACAGTTACCCCCCTCTAGCT  
GGTAATCTCGCCCACGCCGGAGCATCGGTAGACCTCACCATCTTTTCACT  
ACACTTAGCCGGAATCTCTTCAATTCCTGGAGCTATCAACTTTATCACAA  
CCATTATCAATATAAAACCAGCCTCAACCTCTATATACCAAATTCCCCTA  
TTCGTTTGATCTGTCCATAATTACGGCCGTCCTTCTCCTCCTTTCCCTCCC  
CGTCTAGCCGCCGGGATCACAATGCTCCTAACCAGCCGAAACTTAAACA  
CCTCATTTCTGACCCAGCCGGAGGTGGAGACCCCATTTCTTTACCAACAC  
CTA-----  
-----  
-----  
-----

-----TTCCCTCGAGAGAAACCTCCACCCGTCTAACTGCCTTGG  
CATGTTGTTGCTGTCTGACGCCACCAGTGTACCAAGCTGTCCGAGCTCT  
CCTGGGGCATGTGCCCTCAGCAACTTCCCTGCTATTTGCAAGACAGAGGAC  
TTCTCCAACCTGCCCAAAGATATGGTGGTGCAGCTTTTGTACACAGAGGA  
GCTAGAGACAGAAGACGAGAGACTGGTTTATGAAGCTGCCCTGAACTGGA  
TCAACTATGACCTGGAAAGGAGGCACCTGCCACCTTCCAGAGCTTCTGAGA  
ACGGTCCGCCTCGCCCTGCTGCCTGCCATCTTTCTGATGGAGAATGTCTC  
GACGGAAGAGCTGATCAACGCCAGGCCAAGAGCAAGGAGCTGGTGGATG  
AAGCCATCCGCTGTAAGCTGAAAATCCTGCAGAATGATGGTGTCTGTTAAC  
AGCCTGTGTGCTCGACCAAGGAAAACCAGCCACGCCCTCTTTCTTCTGGG  
AGGGCAGACTTTCATGTGTGACAAGTTGTACCTGGTGGACCAGAAGGCCA  
AAGAAATCATCCCCAAGGCTGACATCCCCAGCCCCAGGAAGGAGTTCAGC  
GCCTGCGCCATCGGCTGTAAGGTGTACATCACTGGTGGGA--GAGGCTC-  
AGAGAACGGCGTGTCCAAGACGTATGGGTCTACGACACCGTCCACGAGG  
AATGGTCCAAGCGGCTCCAATGCTCATTGCCAGGTTTGGCCACGGCTCT  
GCGGAGCTGAAACATTCGCTCTATGTGGTCCGAGGTCACACTGCAGCAAC  
CGGCTGCCTCCCGGCTTCTCCGTCAGGATGATTACATTGTTGTGTTTCACT  
CGTTCCACAACGAGGCTGATACTTAATGAAGCAGAGCTAATCATGGCACT  
GGCCAGGAGTTCCAGATGAGAGTGGTAACTGTATCTCTGGAGGAACAGT  
CTTTCCCCAGTATCATCCAGGTGATCAGCCGTGCTTCCATGTTAGTCAGC  
ATGCATGGAGCTCAGCTTATCACCTCACTCTTCCCTCCCCAGAGGAGCTGC  
AGTGGTGGAACTGTTCCCTTTGCTGTGAACCCTGAGCAGTACACCCCAT  
ATAAAACCCTTGCCCTCCCTTCCAGGCATGGACCTTCATTACATCTCCTGG  
AGGAACACTAAGGAGGAAAACACCATCACCCACCCAGACAGACCCCTGGGA  
ACAAGGGGGCATCACTCACTTGGAGAAGGAGGAACAGGAGCGAATACTGG  
CCAGTAAGGATGTCCCAGGCACCTCTGCTGCCGCAACCCTGAGTGGCTC  
TTCCGGATTTACCAGGATACTTTGGTGGACATCCCTTCCTTCCCTGGAAAT  
CCTCAA---AGAGGGCATGAAG---TCCAAGCCAGTGTGAAAAA---GT  
CAAAGCTGGCCGGCATGGTCCACCCGGGCGCGTCAGAGAACCCAGTGT  
CAGACCTCAGTACAAACCACTAATGAGGCTAAACTCACAGTCTCCTGGCA  
GATCCCATGGAATTTGAAATACTTGAAGGTAAGAGAGGTGAAGTATGAGG  
TGTGGATCCAGAAAAAGACACCAGCAAGGGGACACTGGAGGATCAAATC  
ATCCAGGCAAACCCTGCACTGGAGGCCTTTGGCAACGCCAAAACATTAAG  
AAACGACAACCTCGTCACGTTTTGGAAAATTCATTTCGAATTCACCTTCGGGA  
CAAGTGGCAAACCTGTCATCTGCTGACGTGAGACGTACCTGCTAGAGAAG  
TCACGCGTCACCTTTCAACTCAAGGCTGAGAGGAACTACCACATCTTCTA  
CCAGATTCTGTCCAATCAGAAGCCAGAGTTGCTGGACATGCTGCTGATCA  
CCAACAACCCGTATGACTACTCCTACATCTCCCAAGGAGAGGTAACAGTC

GCCTCCATCAACGACTCAGAAGAGCTGATGGCCACCGACAGCGCCTTCGA  
TGTGCTCGGCTTCACTCCAGAGGAGAAGATGGGCGTCTATAAGCTGACCG  
GTGCCATCATGCACTACGGCAACATGAAGTTCAAACAGAAACAGCGCGAG  
GAGCAGGCTGAACCTGACGGGACGGAGGCTGCTGATAAATCGGCATACCT  
AATGGGGCTGAACTCCGCTGACCTCATCAAAGGCCGTGTGCCACCCCAGAG  
TCAAGGTAGGAAATGAATACGTCACCAAAGGCCAAAGTGTGGACCAAGTC  
TACTATCCCAATAAGGAGGCCTTCAAGTGTGAGGAGTGTGGGAAGCACTA  
CAACACCAAGCTGGGATATAAGCGCCATGTGGCCATGCACTCTGCCACGG  
CAGGGGATCTCACCTGTAAAGTGTGCATGCAGAGCTACGAGAGTACACCA  
GTTCTCCTGGAGCACCTCAAAGCCACTCTGGGAAGTCTTCGGGTGGCGC  
CAAGGAGAAAAAACACCCGTGTGACCCTGTGACCGTCGTTTCTACACGC  
GGAAGGATGTCAGACGGCACATGGTGGTCCACACGGGCCGAAAGGACTTC  
CTGTGCCAGTACTGTGCCAGCGCTTCGGCAGGAAGGACCATCTGACACG  
CCACGTGAAGAAGAGCCACTCGCAGGAGCTGCTGAAGATCAAACGGAGC  
CTCCGGATATGTTAGGTCTTTTAGCTTCTGGATCACCACCTTGCTCTGTG  
AAGGAGGAGCTCAGCCCCATGATGTGTGGCATGGGTCCCAACAAAGACCC  
CATGATGGGCAAACCATTCCCCAGTGGGGCTCCTTTTCCAATGGGCATGT  
ACAACCCCCACCAT-----CTCCAGGCGATGTCTAATACTGGGGTGGGT  
CACCCA-----CACCCGTCCCTAATGCCAGTTCATGTCTGCAGCTTT  
GGGCATGGGCTGTCACATGGAANNNNNNNNNNNNNNNNNNNNNNNNNNNNNNNNNGTTTACAGATCAGT  
GATGGATCGAATAT  
CGTCAACCTGTTGGCTAGTAACTCTCCAAGTGTTCGTATGCCCTGACCC  
AGCAGAAATACTTCAGTAACTACAGTCCTGTGATTGGGTTTTACATTTAC  
GAACCCATCGAGTACTGGAACCTCCACGGTGCAAGAGCACCTGAAGACTCT  
GAGTCATGGCTTCAACAAGATCTCCTGGATGGACAACTTTTTCCACTACC  
TGCGGGTGGTGAACGTGAGTGCCTCAACCAAGAGCGACTTCATCAGCATC  
CTAAAAGGCTCCTTCTGCGCAGCCCTGAGTACCAGCACTTCACTGAGGA  
CATCATATTTCTCCAAGA---ACCGCGAGACTG-----ATGAGTACGACA  
TCATTGCCTCACGGATGTACTTGGTGGCACGGACGACTGAGAAGAAGCGC  
GAGGAGGTTGTGGAGCTACTGGAAAAGCTTCGTCCATTGATGCTAATAAA  
CAGCATCAAGTTCATTGCCTTCAACCCACATTTGTGTTTCATGGACCGCT  
ACAGCTCCTCCGTATCTCGCCCATCTGACCTCAGGCTTCAGCGTACTC  
ACTATCCTCATCCTCACTTTCTTCTTCTGGTCATCAACCCCTTGGNNNNNNNNNNNNNNNNNNNNNNNNNN  
NNNNNNNNNNNNNNNNNNNNNNNNNNNNNNNNNGGCTTTC  
ACCAGTTTGAATGGCAGCCGGCTCTCAAGAATGTGTCCACATCTTGCAAT  
GTTGGCATTATTAATGGGCTCTCTGGATGGACTTCCTCGCTGGATGACTC  
CCCGGCTGACACCATCACTCGGCGGTTTTCGCTATGATGTGGCACTGGTGT  
CAGCCTTAAAGGATCTGGAGGAGGACATCATGGAGGGGCTGAGAGAGAGT  
GGGATGGAAGACAGCGCTTGCACCTCAGGCTTTAGTGTGTCATGATCAAGGA  
GTGTTGTGATGGCATGGGCGATGTCAGCGAGAAGCACGGCGGAGGACCAG  
CTGTTCTGAGAAGGCTGTGCGTTTCCTTCACTATTATGTCTGTCTCG  
GTCCTGGCAGAAGAGGAGGAG-----  
-GAGGAGTTACCGTCTTCACCGAGCCAAAGCCAAACTCAGAACTGTCCT  
GTAAGCCCCTTTGCTGATGTTTGTGGATGAGTCAGACCATGAGACGCTC  
ACAGCTGTCCTGGGGCTATAATTGCGGAGCGTAACGCAATGAAAGAAAG  
CAGGCTCATCCTGTCCATTGGCGGCTGCCTCGCTCCTTCCGCTTCCACT  
TCAGAGGCACGGGATACGATGAGAAGATGGTGCAGACATGGAGGGCCTG  
GAGGCTCGGGGTCCACCTATATCTGCACTCTGTGCGACTCCAGCCGGGC  
AGAGGCTCTCAAAAATATGGTGTCTCACTCCATCACTCGCTGTGATGAAG  
AGAACCTAGAACGTTACGAAATATGGAGAACCAACCCCTTCTCTGAGTCT  
GTAGACGAGCTGCGAGACAGAGTGAAAGGGGTCTCTGCCAAGCCCTTCAT  
GGAGACCCAGCCACACTGGATGCATTACACTGTGACATTGGCAATGCCA  
CTGAGTTCTACAAAATATTCCAGGATGAGATCGGGGAGGTGTACAAAAG

GT---CAAC---CCGACCCGGGAGGAGCGGCGCAGCTGGAGGGCAGCCCT  
AGATAAACAGCTGAGGAAGAAGATGAAGCTTAAGCCCGTAATGAGGATGA  
ATGGGAACTACGCCCGCAGGCTAATGACCCTGGAGGCTGTGGAGGTGGTG  
TGTGAGCTGGTGCCCTCAGAGGAGAGGAGGGAGGCCCTGAGGGAGCTTAT  
GAGGTTCTACCTCCAGATGCGGCCCTGTGTGGCGGCCACCTGCCCGGCCA  
AGGAATGCCCCGACCAGCTGTGCCGCTACAGCTTAACTCCCAGCACTTT  
GCCGACCTCCTCTCTCTACCTTCAAATATAGGTACAATGGAAAAGATAAC  
CAATTACCTTACAAGACCCTGGCCCATGTGCCTGAAATCATAGAGAGGG  
ATGGATCCATAGGAGCCTGGGCCAGCGAGGGGAACGAGTCGGCAAACAAA  
TCGTACACCATCGAGATGGGTCCCCCTGGGGCCCCGGTGGAAAGGAGAACCC  
ACAGCCTTTCTGCTGCTCCATTGAAGACCCCAAAAACAGACGAAGTTCA  
AGGGCATCAAGACCTACATTTTACATACCGGGTACCGCCGAGTCACACAGGG  
CGTCCCCTTACAGGCGTTACAAAACACTTTGACTGGCTTTACAACCGCTT  
GCTGCACAAGTTCACTGTGATCTCCGTGCCTCACCTGCCTGAGAAGCAGG  
CCACGGGACGATTTGAAGAAGACTTCATCGAGAAGCGCAAGAGACGACTG  
ATACTGTGGATGAACCACATGACCAGTCACCCAGTCTCTCCCAGTATGA  
AGGCTTTGAGCACTTTCTGATGTGTGCTGACGACAAGCAGTGGAAACTGG  
GGAAGAGGCGGGCAGAGAAGGACGAGATGGTGGGCGCCATTTTCATGCTG  
ACCTCCAGATCCCTAACGAGCACCAGGACCTTCAGGATGTGGAGGAGCG  
GGTCGACTCCTTCAAGGCCTTTGCTAAAAAATGGACGACAGCGTGATGC  
AGCTCACACACGTTGCCCTCGGAGCTGGTGCGCAACACCTGGGTGGGTTT  
AGGAAGGAGTTCCAGCGGCTGGGGAATGCCTTCCAGTCCATCAGCCAGGC  
GTTTCATGCTGGACCCCTCCACAGCTCAGACGCCCTCAACAACGCCATCT  
CCCATNNNNNNNNNNNNNTCCTCAAACCTGACCTCTCTGGGTTTCATCATCGGAGTCGGTGTGG  
TCGGAAACCTCCTGATCTCCATCCTGCTGGTCAAAGACAAGAGCCTGCAC  
CGAGCGCCCTACTATTTTCTGCTGGACCTGTGCGCCTCCGACATCCTGCG  
CTCCGCCATCTGCTTCCCATTTGTCTTACCTCGGTCAAGAATGGATCTG  
CCTGGACCTACGGCAGCTGACCTGCAAAGTGATCGCCTTCTGGGTGTG  
CTCTCCTGTTTTCCACACGGCGTTCATGCTCTTCTGCGTCAGCGTCACCCG  
CTACCTGGCCATCGCGCATCACCGTTTCTACACCAAGAGGCTGACCTTCT  
GGACCTGCCTGGCCGTCTGTCATGGTGTGGACGTTGTGCGGTGGCTATG  
GCGTTCGCGCCGGTCTAGACGTGGGGACGTACTCTTTTATCCGGGAGGA  
GGACCAGTGCACGTTCCAGCACCGCTCCTTCCAGGGCGAACGACTCGCTGG  
GCTTCATGCTCCTGCTGGCCCTCATCCTCCTGGCCACACAGCTGGTTTAC  
CTCAAGCTCATCTTTTTTGTCCACGACCGTCCGAAAGATGAAGCCCGTCCA  
GTTTCGTGCCTGCTGTGTCAGCCAGAACTGGACCTTCCACGGGCCTGGCGCCA  
GTGGGCAGGCGGCGGCAACTGGCTGGCCGGATTTGGTTCGAGGCCCCACC  
CCGCCTACTTTGCTGGGCATCCGGCAGAACAGCAACGCAGCGGGCCGCAG  
GCGTCTACTGGTATTGGATGAGTTCAAACAGAGAAGAGGATTAGTAGGA  
TGTTCTACATCATGACGTTTTTCTTYCTGGCACTGTGGGGGCCCTATCTG  
GTCGCTGCTACTGGCGGGTGTGTTGCAAGGGGCCAGTAGTCCCTGGGGG  
GTACCTGACGGCGGCCGTGTGGATGAGCTTTGCCAGGCCGGGGTCAATC  
CTTTCATCTGCATCTTCTNNNNNNNNNNNGCCAAATCTCGCTTTCACCCTGGCGTGGGGAC  
TGGTCTGGCACGGAGC---GCAGCGTCCCACTCGGCAACAGCTTGCTAT  
CCCCGAGCAAACCGAGGAGCCCACTGTTGCCACCCCCCGCAGCGATGG  
TTTGTACCC---CTGCCAACAAACCGACTGGACTTTGCTGCCTCGGCATA  
CGACGCCGCT-----GATTTGCGCCGGTAACGCGGCCACCTTGCTGT  
CCTACGCAGCGGCCGGAGTGAAGGCTC-----TTCCCCTGCCGACTGCA  
GGCTGCTCAACCGGCCTCTTGGCTATTACGCAGACCCGTCCG---GCTG  
G---GGAGGACGCACGCCCGCCGAGTACTGTGGCGTAAATAGCAAATCCA  
GCTCGGTCTTTTCTGCTGGCCCGCAACTCTCTCGGCGGCAGAGCGGGC  
A---CC---AACTACCTGG-----CCGAGGA---GGGA---GACTC  
---CATCCCAGCGGAGAGATCACCG---AT---CGGGGGCTCGGAGGAGA

CCACCAAACCCAAAGACATGAC---ATCTGA---GTCGAGCTGGATAGAG  
---ACGCCGTCCTCCATTAAGTCCATTGATTTCGAGCGATTCTGGTATCTT  
TG---AACAGGCCAAAAGGAGGAGAATCTCACCTTCTGCCACGCCG----  
-----GTTTCAGAGACAGTGTCCCCGTTAAAATCTGAGCATCACTCAACA  
GGCGAAGTCACAGAGAGAGAAGTGGCGTTGGGGATAAATCCATTCGCGGA  
TGGGATGGGAGCCTTCAAATAAAACCACAGCTCCCACGATATTGGCTCCG  
G---ACAGACGGCGTTTTCCTCCCAGGCA---CCCGGCTAC---GCAGCA  
GCCGCCCTGGGA---CACCATCA-----CCACCCGACCCACGTTGGCTC  
T---TACTCCACGGCGGCTTTCAACTCCACCAGGGACTTTCTCTTCAGAA  
ATCGGGGTTTTCGGGGACGCCACCGG-----CGCGCAGCACAGT  
TTGTTGCGCTC-----TGGAAGTTT---C-----GCAGGGCCACA  
TGGACACTCAGATGCAGCGGGGACCTGCTCTTCCCAGGGCTCCACGAG-  
--CAAGCAGCGAGCCATGCCTCTTCCAACGTGGTCAACAGCCAGATGCGA  
CTGGGCTTCTCGGGGACATGTACGGACGTGCCGATCAGTATGGCCACGT  
TACGAGCCCACGGT---CCGACCACTACGCTTCGACCCAGCTGCACGGCT  
ATGGCCCCATGAACATGAATATGGCCGCA---CACCACGGAGCAGGGGCC  
TTCTTTTCGATACATGAGGCAACCGATCAAACAAGAGCTCATCTGCAAGTG  
GATCGAGCCGGAACAGCTGACGAATCCCAAAAAGTCGTGCAATAAACTT  
TTAGCAGATGCACGAGCTCGTGACCCATCTGACGGTGGAGCATGTGGGG  
GGACCGGAGCAGACCAACCACATCTGCTTCTGGGAGGACTGCTCCAGAGA  
AGGGAAGCCATTCAAAGCCAAATACAACTTGTAATCATATCAGAGTAC  
ACACCGGAGAAAAGCCCTTTCCTGTCCGTTCCCCGGCTGTGGCAA

>*Cephalopholis argus*

AGCCTATTAATTTCGAGCTGAATTAAGCCAGCCAGGTGCTCTTCTGGGCGA  
TGATCAGATTTATAATGTTATTGTACGGCACACGCTTTCGTAATAATCT  
TCTTCATAGTAATGCCAATTATAATTGGCGGTTTCGAAACTGACTTATC  
CCCCTAATAATTGGTGCTCCTGACATAGCATTCCCCGAATAAATAACAT  
GAGCTTCTGACTTCTTCCCCATCTTTCCTACTTCTGCTGGCCTCCTCTG  
GAGTAGAAGCAGGTGCTGGAACCTGGCTGAACAGTTTACCCCCCTCTAGCT  
GGCAACTTAGCCCATGCAGGCGCATCTGTTGACCTAACCATTTTCTCCCT  
GCATTTAGCAGGTATTTTCATCAATCCTAGGGGCGATTAATTTTATCACAA  
CCATTATTAACATGAAACCTCCAGCTATTTCCCAATATCAAACGCCCTG  
TTTGTATGAGCTGTTCTAATTACAGCTGTTCTTCTTCTCCTCTCTCTTCC  
TGTCCTTGCTGCCGGCATTACAATACTTCTAACAGATCGAAATCTAAATA  
CCACCTTCTTTGACCCAGCTGGCGGAGGAGACCCAATTCTTTATCAGCAC

-----  
-----  
-----

-----TTCTGGAGAGAAACCTTCACCCATCTAACTGCCTTGG  
CATGCTGTTGCTGTCTGACGCTCACCAAGCTGTCAGAGCTCT  
CCTGGGGTATGTGCCCTCAGCAACTTCCAGCTATTTGCAAGACAGAGGAC  
TTCTCCAACCTGCCCAAAGATATGGTGGTGCAGCTTTTGTACACGAGGA  
GCTAGAGACAGAAGATGAGAGACTGGTTTATGAAGCTGCCCTTAACTGGA  
TCAACTATGATCTGGAAAAGAGGCACATGCCACCTTCCAGAGCTCCTGAGA  
ACGGTCCGTCTGGCCCTGCTGCCTGCCATCTTTCTCATGGAGAACGTTTC  
TACCGAAGAGCTGATCAACGCCAGCCAAAGAGCAAGGAGCTGGTGGATG  
AAGCTATCCGTTGTAAGCTGAAGATCCTGCAGAACGATGGCGTCGTTAAC  
AGCCCATGTGCTAGACCAAGAAAGACCAGCCATGCCCTCTTTCTTCTG  
AGGGCAGACGTTTCATGTGTGACAAGTTGTACCTGGTGGACCAGAAAGCCA  
AAGAGATCATCCCCAAGGCTGACATTTCCAGCCCCAGGAAGGAGTTCAGC  
GCCTGTGCCATCGGCTGCAAGGTGTACATCACTGGTGGGA--GAGGCTC-  
AGAGAATGGTGTGTCCAAAGATGTGTGGGTCTATGACACCGTCCAYGAGG

AATGGTCGAAGGCGGCACCCATGCTCATTGCCAGGTTTGGCCATGGCTCT  
GCGGAGCTGAAACACTGCCTCTACGTGGTAGGAGGTCACACAGCAGCAAC  
TGGCTGTCTGCCAGCCTCTCCGTCCGGATGAATACATTGTTGTGTTTCAGT  
CGTTCAACAACAAGGCTGATACTGAATGAAGCAGAGCTAATCATGGTGCT  
GGCCAGGAGTTCCAGATGAGAGTGGTGACAGTATCCCTGGAGGAACAGT  
CTTTCCCCAGTATTGTCCAGGTGATCAGTCGTGCTTCTGTGTTAGTCAGT  
ATGCACGGAGCTCAGCTGATCACCTCACTCTTCCCTCCCCAGAGGAGCTGT  
TGTGGTGGAGCTATTCCCCTTTGCTGTGAACCCAGAGCAGTACACCCCAT  
ATAAAAACCTTGCCACCCTTCCAGGCATGGACCTTCACTATATCCCCTGG  
AGGAACCTAAGGAGGAGAACCATCACCCACCCAGACAGACCCTGGGA  
ACAAGGGGGCATTGCTCACCTGGAGAAGGAGGAGCAAGAGCGAATACTAG  
CAAGCAAAGATGTCCCAGGCACCTGTGCTGCCGCAACCCAGAGTGGCTC  
TTCCGGATCTACCAGGACACTTTGGTGGACATCCCTTCCCTTCCCTGGAAGT  
CCTTAA---AGAGGGCATGAAG---ATGAAGCCAGCATAAAGAA---AT  
CAAAGCTGGCTAGCACAGTCCACCCGGGCGGGTCAGAGAACCCAGTGT  
CAGACCTCAGTACAAACCTAACGAGGCCAAGCTCACTGTCTCCTGGCA  
GATCCCATGGAATCTGAAATACCTGAAGGTGAGAGAGGTGAAGTACGAGG  
TGTGGATCCAGAAAAAGACACCAGCAAGGGCACGCTGGAGGATCAAATC  
ATCCAGGCGAACCCCGCGCTGGAGGCCCTTCGGCAACGCCAAAACGTTGAG  
AAACGACAACCTCGTCTCGTTTTGGAAAATTCATCCGAATTCACTTTGGGA  
CGAGCGGCAAGCTGTCTGCTGACATCGAGACGTACCTGCTGGAGAAG  
TCACGTGTCACCTTTCAGCTCAAGGCTGAGAGGAACTACCACATCTTCTA  
CCAGATCCTGTCCAATCAGAAGCCAGAGCTGCTGGACATGCTGCTGATCA  
CCAACAACCCGTATGACTACTCCTACATCTCCCAAGGAGAGGTGACAGTT  
GCCTCCATCAATGACTCGGAGGAGCTGATGGCCACCGACAGCGCCTTCGA  
TGTGCTCGGCTTCACTGCAGACGAGAAGATGGGTGCTTACAAACTGACCG  
GCGCCATCATGCACTACGGCAACATGAAGTTCAAACAGAAGCAGCGTGAG  
GAGCAGGCTGAGCCGGACGGGACGGAGGCTGCTGATAAATCGGCCTACCT  
AATGGGGCTGAACTCTGCTGACCTCATCAAAGGGCTGTGCCATCCCAGAG  
TCAAGGTAGGAAATGAATACGTCACCAAAGGTCAAAGTGTGGACCAGGTC  
TACTACCCCAACAAGGAGGCCTTCAAGTGTGAGGAGTGTGGGAAGCACTA  
CAACACAAAGCTTGGATATAAGCGCCATGTGGCCATGCACTCCGCCACGG  
CAGGAGATCTCACCTGTAAAGTGTGCATGCAGAGCTACGAGAGCACGCCT  
GTGCTCTTGGAGCACCTCAAGAGCCACTCCGGGAAGTCTTCCGGGTGGCGC  
CAAGGAGAAAAACATCCGTGCGACCCTGTGACCGTTCGTTTTCTACACGC  
GGAAGGATGTGAGACGGCACATGGTGGTCCACACGGGCCGAAAGGACTTC  
CTGTGCCAGTATTGTGCCAGCGCTTTGGCAGGAAGGATCATCTGACACG  
CCACGTGAAGAAGAGCCACTCGCAGGAGCTACTGAAGATTAAGACGGAGC  
CTCCTGATATGTTAGGTCTTTTAGCATCTGGGTCACCCCTTGTCTGTG  
AAGGAGGAGCTCAGCCCCATGATGTGCGGCATGGGTCCCAATAAAGACCC  
CATGATGGGCAAACCGTTTCCCAGTGGGGCCCCCTTTCCGATGGGCATGT  
ACAACCCCAACCAT-----CTCCAGGCCATGTCTAATTCTGGGGTGGGT  
CACCCA-----CACCCGTCCCTGATGCCAGTCCCTTGTCTGCAGCTAT  
GGGCATGGGCTGTACATGGAATATCTGATCTATGCCTCTTTCTCATTCA  
TGGGATGTTTACAAATCAGTGATGGATCAAATATTGTGAACCTGCTGGCT  
AGTAACTCTCCAAGTGTTCATATGCTCTGACCCAGCAGAAATACTTCA  
TAACTACAGTCTGTAATCGGATTTTACATTTATGAGCCCATCGAGTACT  
GGAACTCCACAGTGCAAGAGCACCTGAAGACTCTGAGTCATGGCTTCAAT  
AAGATCTCTTGGATGGACAACCTTTTCCACTACCTGCGGGTAGTGAATGT  
GAGTGCATCAACCAAGAGCGACTTCATCACCATCCTCAAGGGCTCCTTTC  
TGCGCAGCCAGAGTACCAGCATTTCACTGAGGACATCATATTCTCCAAG  
A---ACCGTGAGACTG-----ATGAGTACGACATCATCGCCTCACGGAT  
GTACTTGGTGGCACGGACAACAGAGAAGAAGCGCGAAGAGGTGGTGGAGC

TTCTGGAAAAGCTTCGTCCATTGATGCTGATTAACAGCATCAAGTTCATT  
GCATTCAATCCTACGTTTGTGTTTCATGGACCGCTACAGCTCCTCTGTCAT  
CTCACCCATCCTGACCTCAGGCTTCAGCGTACTCACAATCCTCATCCTCA  
CTTTCTTCCCTAGTCATCAACCCCTTGGGGAACCTTCTGGCTCATCCTTACG  
GTAACATCTGTGGAGCTGGGCGTCTTGGGTTTGATGGGCTTTCACCAGTT  
TGAATGGCAGCCGGCTCTCAAAAATGTGTCCACATCGTGCAGTGTGGCA  
TTATTAATGGGCTCTCTGGATGGGCTTCCTCGGTGGATGACATCCCAGCT  
GACACCATCACTCGGCGGTTTTCGCTATGATGTGGCACTGGTGTGAGCATT  
AAAGGATCTGGAGGAGGACATCATGGAGGGGCTGAAAGAGTGTGGGATGG  
AAGACAGTACTTGCACCTCAGGCTTCAGTGTGATGATCAAGGAATCCTGT  
GATGGCATGGGCGATGTCAGCGAGAAGCACGGGGGAGGACCAGTTGTTCC  
TGAGAAGGCTGTGCGTTCCTTTCACTATTATGTCGTCTGTCCTGG  
CAGACGAGCAGGAG-----AAAGAG  
GTTACCATCTTCACTGAGCCAAAGCCAAACTCAGAAATGTCCTGTAAGCC  
CCTTTGCCTGATGTTTGTGGATGAGTCAGACCACGAGACACTCACAGGTG  
TCCTGGGGCCTATAGTTGCGGAGCGTAATGCAATGAAAGAGAGCAGACTC  
ATCCTATCCCTGGGTGGACTCCCTCGCGCCTTCCGCTTTCACTTCAGAGG  
CACGGGATACGATGAGAAGATGGTGCCTGAGATGGAGGGCCTCGAGGCCT  
CAGGATCCACCTATGTCCTGCACTCTTTGTGACTCCACTCGGGCAGAGGCC  
TCCAAAACATGGTGTCCACTCCATCACCCGCAGTCATGAAGAGAACCCT  
AGATCGTTATGAAATATGGAGAACCAACCCTTTTTTCTGAGTCTGCAGAAG  
AGCTGCGAGACAGAGTCAAAGGAGTCTCTGCCAAGCCTTTCATGGAGACC  
CAGCCCACGCTGGATGCATTACACTGCGACATTGGCAATGCAGCAGAGTT  
CTACAAAATCTTCCAGGATGAGATCGGGGAGGTGTACCAAAGGT---CA  
AC---CCCAGCCGGGAGGAGCGGCGCAGCTGGAGGGCAGCCTTAGACAAA  
CAGCTGAGGAGGAAGCTGAAGCTTAAACCAGTGATGAGGATGAATGGTAA  
CTACGCTCGCAGGCTAATGACCCAGGAGGCTGCGGAGGTGGTGTGTGAGC  
TGGTGCCCTCAGAGGAGAGAAGGGAGGCCCTGAGGGAGCTCATGAGGATC  
TACCTCCAGATGAAGCCTGTGTGGCGCGCCACCTGCCCTGCCAAGGAGTG  
CCCCGACCAGCTGTGCCGCTACAGCTTTAACTCCCAGCGCTTTGCCGACC  
TTCTCTCCTCTACATTCAAATACAGGTACAATGGTAAAATAACCAATTAC  
CTGCACAAGACCCTGGCCCATGTGCCCTGAAATCATAGAGAGAGAAGGATC  
CATAGGAGCCTGGGCCAGCGAGGGGAACGAGTCAGCGAACAAG-----

-----  
-----  
-----  
-----  
-----  
-----  
-----  
-----  
-----  
-----  
-----  
-----  
-----  
-----  
-----  
-----

-----NNNNNNNNNNNNNNNNNNNNNAC

TGACCTCTCTGGGTTTTATCATCGGAGTCGGTGTGGTTGAAACCTCCTG  
ATCTCCATCCTGCTGGTCAAAGACAAGAGCCTGCATCGGGCGCCCTACTA  
TTTCTGCTGGACCTGTGCGCCTCTGACATCCTGCGCTCCGCCATCTGCT  
TCCCCTTTGTCTTACCTCGGTCAAAAATGGATCTGCGTGGACCTATGGC  
ACGCTGACCTGTAAGGTGATCGCCTTCCTGGGTGTGCTGTCCTGTTCCA  
CACGGCGTTTTATGCTGTTCTGTGTCAGCGTCACTCGCTACCTGGCCATCG

CGCACCACCGTTTCTACACCAAGAGGCTGACCTTCTGGACCTGCTTAGCT  
GTCATCTGCATGGTGTGGACGTTGTCAGTGGCTATGGCGTTCCCACCGT  
GCTAGACGTAGGGACGTACTCTTTTATCCGGGAGGAGGACCAGTGCACGT  
TCCAGCACCGTTCCCTCAGGGCGAATGATTTCGCTGGGCTTCATGCTCCTG  
CTGGCGCTCATCCTCCTGGCCACACAGCTGGTTTACCTCAAGCTCATCTT  
CTTCGTCCAYGATCGTCGGAAGATGAAGCCTGTCCAGTTCGTGCCTGCTG  
TCAGCCAGAACTGGACCTTCCACGGGCCAGGCGCCAGCGGGCAGGCGGCG  
GCCAACTGGCTGGCTGGATTTCGGTCGAGGCCCCACCCCGCCTACCTTGCT  
GGGCATCCGGCAGAACAGCAACGCAGCGGGCCGTAGGCGTCTACTGGTAT  
TGGATGAATTCAAAAACAGAGAAGAGGATTAGTAGGATGTTCTACATCATG  
ACGTTTTTCTTCTGGCACTGTGGGGGCCATATCTCGTTGCCTGCTACTG  
GCGGGTGTGCAAGGGGCCCTGTAGTCCCTGGAGGCTACCTGACGGCAG  
CCGTGTGGATGAGCTTGGCCAGGCTGGGGTCAATCCTTTCATNNNNNNNNNNNNNNNNNNNNNGCCAA

AT

CTCGCTTTCACCCTGGCGTGGGGACTGGTCCTGGCACGGAGC---GCAGC  
GTCCCCTCGGCAACAGCTTGCTGTCCCGCAGCAAACCGACGAGCCAC  
TGTTGCCACCCCCCGCAGCGATGGTTTGTACCC---CTGCCAACCAACC  
GACTGGACTTTGTGCTCGGCATACGACGCCGCT-----GATTTT  
GCCGGTAACCGGCCACCTTGCTGTCCCTACGCAGCGGCCGGAGTGAAGGC  
TC-----TTCCCTGCCACTGCAGGCTGCTCCAACCGGCCTCTTGCT  
ATTACGCAGACCCGTCAG--GCTGG---GGAGGACGCACGCCGCCGCGAG  
TACTGTGGCGTAAACAGCAAATCCAGCTCGGTCTTTTCTGCTGGCCCGC  
TAACTCTATCGGTGGCAGGGCGGGCA---CC---AACTACCTGG-----  
---CTGAGGA---GGGG---GACTC---CATCCCGACAGAGAGGTCACCG  
---AT---CGGCGCTCGGAGGAG---GCCAAACCAAAGACATGAC---  
ATCAGA---GTCGAGCTGGATAGAG---ACCCCGTCTCCATTAAGTCCA  
TTGATTTCGAGTGATTCTGGTATCTTTG---AACAGGCCAAGAGGAGAAGA  
ATCTCACCTCTGCCACGCCG-----GTTTCAGAGACAGTGTCCCC  
GTTAAAATCTGAGCATCACTCAACAGGCGAAGTACAGAGAGAGAAGTGG  
CGTTGGGGATAAAATCCGTTTCGCGGATGGGATGGGCGCCTTCAAATAAAC  
CACAGCTCCACGACATTGGCTCCGG---ACAAACGGCGTTTTCTCCCA  
GGCG---CCCGCTAC---GCAGCAGCCGCCCTGGGA---CATCACCA--  
----CCACCCGACCCACGTTGGCTCT---TACTCCACGGCGGCTTCAAC  
TCCACCAGGGACTTCTCTTCAGAAATCGGGGTTTCGGGGACGCCACCGG  
-----GGCGCAGCACAGTTTGTTTCGCCTC-----CGGAA  
GTTT---C-----GCAGGGCCACATGGACACTCAGATGCAGCGGGGCAC  
CTGCTCTTCCCAGGGCTCCACGAG---CAAGCGGCAGCCATGCGTCTTC  
CAACGTGGTCAACAGCCAGATGCGGCTGGGCTTCTCGGGGGACATGTACG  
GACGGGCCGACCAGTACGGCCACGTTACAAGCCCACGGT---CCGACCAC  
TATGCTTCGACCCAGCTGCACGGCTATGGCCCCATGAACATGAATATGGC  
CGCA---CACCACGGAGCAGGGGCCCTTCTTTCGATACATGAGGCAGCCGA  
TCAAACAAGAGCTCATCTGCAAGTGGATCGAGCCGGAGCAGCTGACGAAT  
CCAAAAAAGTTCGTGCAAAAAACTTTTAGCACGATGCACGAGCTCGTGAC  
CCATCTGACGGTGGAGCATGTGGGGGGACCAGAACAGACCAACCACATCT  
GCTTCTGGGAGGACTGCGCCAGAGAAGGAAAGCCATTCAAAGCCAAATAC  
AAACTTGTAATCATATCAGAGTACACACCCGGAGAAAAGCCCTTTCACGT  
GTCCGTCCCCGGCNNNNNNNN

>Ceratias holboelli

AGCTTGCTTATCCGGGCCGAACCTAAGCCAACCAGGCGCACTCTTAGGGGA  
CGACCAAATCTACAACGTTATTGTAACAGCACATGCCTTTGTAATAATCT  
TTTTTATGGTTATGCCCATCATGATCGGGGGCTTTGGGAACTGACTAATC  
CCACTAATAATCGGAGCCCCTGACATAGCATTTCGCCGATGAATAATAT  
GAGCTTCTGACTTCTCCCCCATCTTTTCTTCTTCTACTCGCCTCCTCAG



GGGTCGAGGGGGGGCGGGGACTGGCTGAACGGTTACCCTCCCCTAGCA  
GGCAACCTGGCACATGCGGGAGCTTCTGTAGACCTCACAATTTTCTCACT  
CCACCTGGCAGGAGTGTTCGTCAATTTTAGGGGCCATTAACCTTATCACAA  
CAATCATTAATATGAAGCCCCCAGCTATCTCCCAATACCAAACACCCTTA  
TTCGTGTGATCCGTTTAAATTACCGCGGTCTTACTTTTACTATCCCTGCC  
CGTTCGCTGCGGCATTACCATGCTCCTCACGGACCGAAATCTAAACA  
CAACATTTCTTTGACCCTGCAGGAGGGGGAGACCCGATTTCTCTACCAACAC  
CTA-----  
-----  
-----  
-----  
-----  
-----  
-----  
-----  
-----  
-----  
-----  
-----  
-----  
-----  
-----  
-----  
-----  
-----  
-----  
-----  
-----  
-----

-----GGATGAATACATTGTTGTGTTTAGT  
CGTTCAACAACAAGACTAATACTGAATGAAGCGGAGCTAATAATGGCACT  
GGCTCAGGAGTTCCAGATGAGAGTGGTCAAGTATCCCTGGAGGAACAGT  
CATTCCCTAGTATCATCCAGGTGATCAGCAGTGCTACCATGTTAGTCAGT  
ATGCATGGAGCTCAACTTATCACCTCACTCTTCCCTCCCAGAGGAGCTGT  
TGTGGTGGAGCTGTTCCCCTTGTGTGTAACCCAGGCAGTACACCCCAT  
ATAAAACCCTTGCCCTCCCTTCCGGGCATGGACCTGCATTATATCTCCTGG  
AGGAACACTAAGGAGGATAACACCATCACCCACCCAGACAGGCCCTGGGA  
ACAAGGGGGTATTGCTCATTGGATAAGGAGGAGCAAGAACGAATACTGA  
TGAGTAAAGATGTGCCCAGGCATCTGTGCTGCCGAAACCCAGAGTGGCTC  
TTCCGGATCTATCAGGATAACATTGGTGGACATTCTTCCCTCCTGGAAGT  
CCTCAA---AGAGGACATGAAG---ACAAAGCCCAACTTGAAGAA---GT  
CAAAGGGGGCCAGCACACTCCACCCGGGCCGGGTGAGAGAACCTCAGTGT  
CAGACTTCAGTTCAAACCAGTAATGAGGCTAAACTCACAGTGTCTGGA  
GATAACCGTGAATCTGAAATACCTGAAGGTGAGAGAGGTGAAATATCAGG  
TG-----AAAAAGACACCAGCAAGGGGACCCCTGGAGGATCAAATC  
ATCCAAGCGAACCCCTGCATTGGAGGCGTTTGGCAACGCCAAAACAGTAAG  
AAATGACAACCTCTCCCGTTTTGGAAAGTTCATCCGAATTCACCTTGGTA  
CAAGCGGCAAGCTTTCGTCTGCTGACATCGAAACGTACCTGCTGGAGAAG  
TCCCGTGTACCTTCCAGCTCAAGGCTGAGAGAAAATTATCACATCTTCTA  
CCAGATCCTGTCAAAATCAGAAACCAGAGCTGCTGGACATGCTGCTGATCA  
CCAACAATCCCTATGACTACTCTACATCTCCCAAGGAGAGGTAACCGTC  
GCCTCCATCAACGACTCAGAGGAGCTGCTGGCCACGGACAGCGCCTTCGA  
TGTGCTCGGCTTCACTCCCGATGAGAAGATGGGCGTCTATAAACTCACAG  
GTGCCATCATGCACTACGGCAACATGAAATTCAAAACAAAAGCAGCGCGAG  
GAGCAGGCTGAGCCGGACGGGACCAGGCTGCCGATAAATCGGCTTACCT





>Cetostoma regani

AGCCTTCTTATTTCGAGCAGAATTGAGCCAGCCTGGAGCCCTCCTGGGGGA  
TGACCAAATTTACAATGTAATTGTTACAGCACATGCC'TTCGTGATAATTT  
TCTTTATAGTAATACCAATTATAATTGGAGGATTTGGAAATTGGTTGGTT  
CCTTTAATAATTGGGGCCCTGATATAGCATTTCCCCGAATAAATAACAT  
AAGTTTTTGGCTCCTTCCCCATCCTTTTTACTACTTTTAGCTTCCTCTG  
GAGTTGAAGCAGGCGCTGGGACAGGCTGAACAGTTTACCCCTCTTGCA  
GGAAACCTTGCCACGCAGGGGCTCAGTGGATTTAACCATCTTTTCCTT  
ACACTTAGCAGGCGTATCCTCAATCTAGGGGCTATTAAC'TTTATTACAA  
CTATTATTAATATAAAAACCCAGCCATCTCACAATACCAGACCCCTT  
TTTGTATGATCTGTTTTAGTAACAGCCGTCCTCCTCCTTCTTTCCCTTACC  
AGTTCCTGCAGCCGGTATCACCATACTACTTACTGACCGTAATTTAAACA  
CAACCTTTTTTGACCCTGCTGGAGGAGGGACCTATTCTTTACCAACAC  
TTATCTGATTTTTTGGGCACCCGGAGGTTTATATTTTAATTTTACCAGG  
ATTCGGAATAATCTCACACATCGTTGCCTATTATCTGGTAAAAAAGAGC  
CCTTTGGTTATATAGGAATAGTATGAGCTATAATAGCCATCGGTTACTA  
GGATTTATCGTGTGAGCCCACCATATATTTACAGTAGGAATAGACGTTGA  
CACACGAGCATATTTCTAGAGAGGAACCTTCATCCATCTAACTGCC'TTG  
CATGCTGTTGCTGTCTGATGCCACCAGTGTACCAAGCTATCAGAGCTGT  
CCTGGGGCATGTGCCCTCAGCAACTTTCCTGCTATTTGCAAGACAGAGGAC  
TTTCTCCAAC'TGCCAAAGACATGGTGGTGCAGCTTCTGTCCCATGAGGA  
GCTAGAGACAGAAGATGAGAGACTGGTTTATGAAGCTGCCCTTAACTGGG  
TCAACTATGACCTGGAAAGCAGGCACTGCCACCTGCCAGAGCTGCTGAGT  
ACGGTCCGCCTGGCCCTGCTACCCGCTATATTCCTCATGGAGAATGTCTC  
CACAGAAGAGCTGATCAATGTCCAGGCCAAGAGCAAGGAGCTGGTGGATG  
AGGCCATCCACTGCAAGCTGAAGATCTTGCAAAATGATG---TGGTTAAC  
AGCCCTGTGCTCGACCAAGAAAAACCAGCCATGCCCTCTTTCTCTGGG  
AGGGCAGACCTTCATGTGTGACAAGCTGTATCTGGTGGATCAGAAGGCCA  
AAGAGATCATCCCCAAGGCTGACATCCCCAGCCCCAGGAAGGAGTTCAGT  
GCCTGTGCCATCGGCTGTAAGGTCTACATCACAGGTGGGA--GAGGCTC-  
AGAGAATGGTGTGTCCAAGATGTATGGGTCTATGACACCATCCACGAGG  
AATGGTCCAAGGACGCCATGCTCATAGCCAGGTTTGGTACGGCTCT  
GCTGAGCTGAAACACTGCCTCTATGTGGTAGGAGGTCACACAGCTGCAAC  
TGGCTGTCTCCAGCCTCTCCCTCTGGATGAATACATTTGTAGTGTTCAGT

CGTTCAACAACAAGGCTAATTCTGAACGAAGCCGAGCTAATCATGGCACT  
GGCCAGGAATTTTCAGATGAGAGTGGTTACAGTATCCCTGGAGGAACAAA  
CTTTTCGCCAGCATCATCCAGGTGATCAGCAGGGCCTCCATGTTAGTCAGT  
GTGCATGGAGCTCAGCTTGTACCTCACTCTTCCCTCCCCGAGGAGCTGC  
TGTGGTGGAGCTGTTCCCCTATGCTGTGAACCCAGAACAGTACACCCCAT  
ATAAAAACACTTGCCTCCTTGCCAGGCATGGACCTTCAATACGTTTCCCTGG  
AGGAACACTATGGAGGGGAACACCATCACCCACCCAGACCGACCCCTGGGA  
ACAAGGAGGTATCGCYCATTTGGAAAAAGATGAACAAGAGCGAATACTGG  
CCAGCAAGGACGTCCCCAGGCACCTGTGCTGCCGCGACCCGGAGTGGCTC  
TTCCGAATCTACCAGGACACTTTGGTAGACATCCCCTCATTCCCTGGAAGT  
CATCAA---AGAGGGCATCAAG---GCTAGGCCAGCCTGAGGAA---GG  
CCAAGCCGGCCAGCACGGTTCATCCGGGCCGGGTGAGAGAACCGCAGTGC  
CACACCTCAGTCCAAGCCACCAACGAGGCTAAACTCACGGTGTCTGGCA  
GATCCCCTGGAATCTGAAATACCTGAAGGTGAGAGAAGTGAAGTATGAGG  
TG-----AAGAAGGACACCAGCAAGGGAACACTGGAGGATCAAATC  
ATCCAGGCAAACCCTGCACTGGAAGCCTTTGGAAAATGCCAAAACAGTGAG  
GAATGACAACACTCATCCCGTTTTGGAAAATTCATYCGAATTCACTTTGGAA  
CCAGTGGCAAGCTGGCGTCTGCTGACATTGAGACTTACCTGCTGGAGAAG  
TCGCGTGTACCTTCCAGCTCAAGTCTGAGAGGAACTACCACATCTTCTT  
CCAGATCTTGTCCAATCAGAAGCCAGAGCTGCTGGACATGCTGTTGATTA  
CCAACAACCCATATGACTACTCCTACATCTCCCAAGGAGAGGTAACAGTA  
CAATCCATCAACGACTCAGAGGAACTGTTGGCCACTGACAGTGCC TTCAC  
TGTA CT TGGCTTCAATCAAGAGGAGAAGTTGGGAATCTATAAGCTGACCG  
GTGCCATTATGCACTAYGGCAACATGAAGTTTAAGCAGAAGCAGCGTGAG  
GAGCAGGCTGAACCTGATGGAACGGAGGCTGCTGATAAGGCAGCTTACCT  
AATGGGGCTGAACTCTGCAGACCTTATCAAAGCCCTGTGCCATCCCAGAG  
TCAAGGTAGGAAATGAATATGTTACCAAAGGCCAGGGTGTAGACCAAGTC  
TACTACCCCAACAAAGAGGCCTTCAAGTGTGAGGAGTGTGGCAAGCACTA  
CAACACCAAGCTGGGATACAAGCGCCATGTGGCCATGCACTCTGCCACGG  
CAGGGGACCTTACCTGTAAAGTGTGCATGCAGAGCTTCGAGAGCACGCC  
GTGCTCCTGGAGCACCTCAAGAGCCACTCAGGGAAGTCCTCGGGTGGCGC  
CAAGGAGAAGAAACACCCATGTGACCCTGCGACCGTCGCTTCTACACTC  
GGAAGGATGTAAGACGGCACATGGTGGTCCATACAGGTCGAAAGGACTTC  
CTGTGCCAGTACTGTGCCAGCGCTTTGGCAGGAAGACCACCTGACACG  
GCATGTGAAGAAGAGCCACTCGCAGGAGCTGCTGAAGATCAAGACAGAGC  
CTCCGGATATGTTAAGTCTTTTAGGTTCTGGCTCTCCACCTTGTTCGGTC  
AAGGAGGAGCTTAGCCCCATGATGTGCAGCATGGGTCCCAACAAAGACCC  
CATGATGGGCAAACCTTTCCCAGCGGGACCCCTTCCCGATGGGCATGT  
ATAACCCCATCAT-----CTCCAGGCCATGTCCAATTCTGGNGNGGGTCA  
CCCC-----CACCCCTCCCTGATGCCAGTCCCTGTCTGCAGCTATGG  
GCATGGGCTGTACATGGAATATCTCATCTACGCCCTCGTTCTCATTCATG  
GGATGTTTACAAATCAGTGATGGGTCAAACATTGTGAACTTGCTGGCCAG  
TAACTCTCCGAGCGTTTCGTACGCGCTGACCCAGCAGAAATACTTCAGTA  
ACTACAGYCCCCTGATCGGGTTTTACATTTACGAGCCCATTTGAGTACTGG  
AACTCCACGGTGCAGGAGCATCTAAAGACACTGAGTCACGGCTTCAACAA  
GATCTCCTGGATGGACAACCTTCTTCCACTACCTGCGGGTGGTGAACGTGA  
GYGCGTCGAACAAGAGCGACTTCATCACCATCCTCAAGGGCTCCTTCCTG  
CGCAGCCCAGAGTACCAGCACTTACC GAAGACATCATCTTCTCTAAGA-  
--ACCGTGAGAGTG-----ATGAGTATGACATTATTGCCTCACGCATGT  
ACCTGGTGGCGCGGACCACAGAGAAAAAGCGCGAGGAGGTGGTGGAGCTT  
CTGGAGAACTGCGTCCGCTGATGCTAATCAACAGCATYAAGTTCATCGC  
CTTCAACCCACCTTTGTTTTTTCATGGACCGTTACAGCGCCTCTGTCATCT  
CACCCATCCTGACCTCAGGCTTCAGCGTGCTCACCATCCTCATCCTCACT





CAATCCTTAACATGAAACCCCTGCTATGTCTCAGTATCAAACCTCCCCTT  
TTCGCTGATCTGTCTTAATTACAGCCGTTCTACTTCTCTTGTCCCTCCC  
CGTTCTTGCAGCCGGAATTACAATACTCCTTACAGATCGAAACCTTAATA  
CAACCTTCTTTGACCCTGCGGGGGCGGCGATCCCATTCTTTACCAACAT  
CTATTC-----  
-----  
-----

-----TTCTAGAGAGAAACCTTACCCATCTAACTGCCCTCGG  
CATGCTGTTGCTGTCCGATGCCACCAGTGCACCAAGCTGTCAGAGCTCT  
CCTGGGGCATGTGCCCTCAGCAACTTTCCCGCTATTTGCAAGACAGAGGAC  
TTCTCCAACCTGCCCAAAGATATGGTGGTGCAGCTTTTGTACATGAGGA  
GCTCGAGACAGAAGATGAGAGACTGGTTTATGAAGCTGCCCTCAATTGGA  
TCAACTATGACCTGGAAAAGAGGCACTGCCATCTTCCAGAACTCCTGAGA  
ACGGTCCGCCTGGCCCTGCTGCCTGCCATCTTTCTCATGGAGAACGTATC  
TACAGAAGAGCTGATCAACGCCACAGGCAAGAGCAAGGAGCTGGTGGATG  
AAGCTATCCGCTGTAAGCTGAAGATCCTCCAGAATGATGGTGTGCTCAAC  
AGCCCGTGTGCCCGACCAAGAAAAACCAGCCATGCCCTCTTTCTTCTGGG  
AGGGCAGACTTTCATGTGTGACAAGTTGTACCTGGTGGACCAGAAAAGCCA  
AAGAGATCATCCCCAAGGCTGACATCCCCAGCCCCAGGAAGGAGTTCAGC  
GCCTGCGCCATCGGATGTAAGGTGTACATCACTGGTGGGA--GAGGCTC-  
AGAGAATGGTGTGTCCAAAGATGTGTGGGTCTACGACACCGTCCACGAGG  
AATGGTGAAGGCGGCGCCCATGCTCATTGCCAGGTTTGGCCATGGTTCT  
GCGGAGCTGAAACACTGCCTCTACGTGGTTGGAGGTCACACAGCTGCAAC  
TGGCTGCCTCCCGCTTCTCCATCTGGATGAATACATTGTTGTGTTTAGT  
CGCTCAACAACGAGGCTGATACTGAATGAAGCSGAGCTAATCATGGTGTCT  
AGCCCAGGAGTTCAGATGAGAGTGGTACAGTATCTCTGGAGGAACAGT  
CTTTCCCCAGTATAGTCCAGGTGATCAGCAGTGCTACCATGTTGGTTAGT  
ATGCATGGAGCTCAGCTCATCACCTCACTGTTCCCTCCAAGAGGAGCTGT  
TGTGGTGGAACTCTTCCCTTTTGTCTGTA AACCCAGAGCAGTACACCCAT  
ATAAAACCCCTTGCCCTCCCTGCCAGGCATGGACCTTCACTATGTCTCTTGG  
AGGAACACTAAGGAGGAGAATACCATCACCCATCCAGACAGACCCTGGGA  
ACAAGGGGGCATTGCTCACTTGGAGAAAGAGGAGCAAGAGCGAATACTGT  
TGAGCAAAGATGTCCCTAGGCACCTTGTGCTGCCGCAACCCAGAGTGGCTC  
TTCCGGATCTACCAGGACACTTTGGTGGACATTCTTCCCTTCCCTGGAAGT  
CCTCAA---AGAGGGCATGAAG---ACAAAGCCCAATTTGAAGAA---GT  
CAAAGCCGGCCAACGCAGTCCACCCGGGCGGGTCAGAGAACCCAGTGT  
CAAACCTCAGTTCAAACCACTAATGAGGCTAAACTCACAGTCTCCTGGCA  
NATCCCGTGGAAATCTGAAATACCTTAAGGTGAGAGAGGTGAAATATGAGGT  
GTGGATCCGGAAAAAAGATACCAGCAAGGGAACCTGGAGGATCAAATCA  
TCCAGGCGAACCCCTGCGTTGGAGGCTTTCGGCAACGCCAAAACGCTGAGA  
AACGACAACCTCGTCTCGTTTTGGAAAATTCATCCGAATTCACCTTTGGTAC  
AAGCGGCAAACCTGTCRTCTGCTGACATCGAGACATACCTTCTGGAGAAAT  
CACGTGTCACCTTTCAGCTCAAGGCTGAGAGGAATTATCACATCTTCTAC  
CAGATCCTGTCCAATCAGAAGCCAGAGCTGCTGGATATGCTGCTGATCAC  
CAACAACCCGTATGACTACTCCTACATCTCCAAGGAGAAGTGACAGTGG  
CGTCCATCAACGACTCTGAGGAGCTGATGGCCACAGACAGCGCCTTTGAT  
GTGCTTGGCTTCACTCCAGATGAGAAGATGGGTGTCATAAACTGACGGG  
AGCCATCATGCACTATGGCAACATGAAGTTCAAACAGAAACAGCGTGAGG  
AGCAGGCTGAGCCTGATGGGACGGAGGCTGCTGATAAATCAGCTTACCTA  
ATGGGGCTGAACTCTGCTGACCTCATCAAAGGGCTGTGCCACCCAGAGT  
CAAGGTAGGAAATGAATATGTACCAAAGGCCAAAAGTGTAGACCAAGTCT  
ACTATCCTAACAAGGAGGCCTTTAAGTGTGAGGAGTGTGGGAAGCACTAC





AGACCTGGCCCATGTGCCTGAAATCATAGAGAGAGATGGATCCATAGGA  
GCCTGGGCCAGCGAAGGAAACGAGTNNNNNNNNNNNNNNNNNNNNNNNNNNNNNNNNNNNNNNCCTTAGGGCCCC  
GGTGAAGGAGAG  
CCCACAGCCTTTCTCCTGTTCCATTGAAGACCCCACTAAACAAACAAAGT  
TCAAGGGCATCAAGACGTACATATCGTACCGGGTCACGCCGAGCCACT  
GCGCATCCTGTCTACAGGCGCTACAAACACTTTGACTGGCTGTACAACCG  
CTTACTGCACAAGTTCACGTGTGATCTCTGTGCCTCACCTGCCTGAGAAGC  
AGGCCACGGGGCGATTTCGAGGAAGACTTCATCGAGAAGCGCAAGAGGCGA  
CTGATACTGTGGATGAACCACATGACCAGTCACCCAGTCCTCTCCCAGTA  
TGAAGGCTTCGAGCACTTTCTGATGTGTGCCGATGACAAGCAGTGGAAC  
TGGGCAAGAGACGGGCGGAGAAGGACGAGATGGTGGGTGCCATTTTCATG  
CTGACCCTCCAGATCCCCTAACGAACACCAGGACCTTCAGGATGTAGAGGA  
GCGGGTCGACTCCTTCAAGGCCTTCGCTAAGAAAAATGGATGACAGCGTGA  
TGCAGTCACTCATGTTGCCTCGGAGCTGGTGCCKAAGCACCTGGGTGGG  
TTCAGGAAGGAGTTCCAGCGACTGGGAAATGCCTTCCAGTCTATCAGCCA  
GGCGTTCATGCTGGACCCTCCCCACTGCTCAGAGACCTTCAACAACGCCA  
TCTCCCATNNNNNNNNNNNNNNNNNNNNNNNNNNNNNNNNNNNNNNNNNNNNNNNNNNNNNNNNNNNN  
NNNNNNNNNNNNNNNNNNNNNNNNNNNNNNNNNNNNNNNNNNNNNNNNNNNNNNNNNNNNNNNNNN  
NNNNNNNNNNNNNNNNNNNNNNNNNNNNNNNNNNNNNNNNNNNNNNNNNNNNNNNNNNNNNNNNNN  
NNNNNNNNNNNNNNNNNNNNNNNNNNNCCGCCATCTGCTTCCCCTTTGTCTTCCACTCGGTCAAGAATG  
GATCTGCCTGGACCTACGGCACGCTGACCTGCAAGGTGATCGCCTTTCTG  
GGTGTCTCTCCTGTTTCCACACAGCGTTTATGCTGTTCTGTGTCAGTGT  
CACACGCTACCTGGCCATCGCACATCACCGTTTCTACACCAAGAGGCTGA  
CCTTCTGGACCTGTCTAGCTGTCACTGTGCATGGTGTGGACGTTGTCTGTG  
GCTATGGCGTTCCCACCGGTGCTAGACGTGGGGACATACTCTTTCATCCG  
GGAGGAGGACCAGTGCACATTCCAGCACCGTTCTCAGGGCGAATGATT  
CGCTGGGCCTTCATGCTCCTGCTGGCGCTCATCCTCCTGGCCACACAGCTG  
GTTTACCTCAAGCTCATCTTCTTCGTCACGACCGCCGAAAGATGAAGCC  
TGTCCAGTTCGTGCCGTGCCGTCAGCCAGAACTGGACCTTCCACGGGCCAG  
GYGCCAGCGGGCAGGCGGGCGCCAACGGCTGGCCGGGTTTGGTCGAGGC  
CCCACCCCGCTACTTTGCTGGGCATCCGGCAGAACAGCAACGCAGCGGG  
CCGCAGGCGTCTGCTGGTTTTTGGATGAATTCAAAACAGAGAAGAGGATTA  
GTAGGATGTTCTACATCATGACGTTTTTCTTCTGGCATTGTTGGGGCCC  
TATCTGGTGCCTGTACTGGCGGGTGTGTGCAAGGGGCCCGTGGTCCC  
TGGGGCTACCTGACAGCAGCCGTGTGGATGAGCTTTGCCCAGGCTGGGG  
TCAATCCTTTTCATCTGCATCTTTCTCCAACAGGGANNNNNNNNNNNNNNNNNNNNNNGGCGTGGGGACTGG  
T  
CCTGGCACGGAGC---GCAGCGTCCCACTCGGCAACAGCTTGCTATCCCC  
GCAGCAAACCGAGGAGCCCACTGTTGCCACCCCCCGCAGCGATGGTTTG  
TCACC---CTGCCAACCAACCGACTGGACTTTGCTGCCTCGGCATACGAC  
GCCGCT-----GATTCGCCGGTAACGCGGCCACCTTGCTGTCCTA  
CGCAGCGCGCGAGTGAAGGCTC-----TTCCCCTGCCGACTGCAGGCT  
GCTCCAACCGGCTCTTGGCTATTACGCAGACCCGTCAG---GCTGG---  
GGAGGACGCACGCCCGCGCAGTACTGTGGCGTGAATAGCAAATCCAGCTC  
GGTCTTTTCTGCTGGCCACTAACTCTATCGGTGGCAGAGCAGGCA---  
CC---AACTACCTGG-----CTGAGGA---GGGA---GACTC---C  
ATCCCGACGGAGCGGTCACCG---AT---CGGCGGCACGGAGGAG---AC  
CAAACCCAAGACATGAC---ATCAGA---GTCAAACCTGGATAGAG---A  
CGCCGTCCTCCATTAAGTCCATCGACTCAAGCGATTCTGGTATCTTTG---  
-AACAGGCCAAAAGGAGAAGGATCTCACCTTCTGCAACGCCA-----  
-GTTTTCAGAGACAGTGTCCCCGTAAAATCAGAGCATCACTCAACAGGCG  
AAGTCACAGAGAGAGAAGTGGCGTTGGGGATAAATCCGTTTCGCGGATGGG  
ATGGGCGCTTCAAATAAACCACAGCTCCCACGATATTGGCTCCGG---  
ACAGACGGCGTTTTTCTCCAGGCG---CCCGGCTAC---GCAGCAGCCG

CCCTGGGA---CACCACCA-----CCACCCGACCCACGTTGGCTCT---  
TACTCCACGGCGGCTTTCAACTCCACCAGGGACTTTCTCTTCAGAAATCG  
AGGATTCGGGGACGCCACCGG-----CGCGCAACACAGTTTGT  
TCGCCTC-----CGGAAGTTT---C-----GCAGGCCACATGGA  
CACTCAGATGCAGCGGGGCACCTGCTCTCCCGGGGCTCCACGAG---CA  
AGCGGCGAGCCATGCGTCTTCCAACGTGGTCAACAGCCAGATGCGGCTGG  
GCTTCTCGGGGGACATGTACGGACGGGCGGACCGTACGGCCACGTTACA  
AGCCCGCGGT---CCGACCACTATGCTTCGACCCAGCTGCACGGCTACGG  
CCCCATGAACATGAAATATGGCCGCG---CACCACGGAGCAGGGGCCCTTCT  
TTTCGATACATGAGGCAACCGATCAAGCAAGAGCTCATCTGCAAGTGGATC  
GAGCCGGAGCAGCTGACAAATCCCAAAAGTCGTGCAACAAAACTTTTAG  
CACGATGCACGAGCTGGTGACCCATCTGACGGTGGAGCATGTGGGGGGAC  
CGGAGCAGACCAACCACATCTGCTTCTGGGAGGAGTGTCCCGAGAAGGA  
AAGCCATTCAAAGCCAAATACAAACTTGTAAATCATATCAGAGTACACAC  
CGGAGAAAAGCCCTTCCGTGTCCGTTTCCCGGCTGTGGCAA

>Chanos chanos

AGCCTCTTAATTTCGAGCAGAGCTTAGCCAACCAGGATCTCTTCTGGGCGA  
TGATCAAATCTATAACGTCATCGTCACAGCGCACGCTTTTGTAAATAATCT  
TCTTTATAGTAATGCCTATCCTCATTGGAGGGTTTCGGAACTGACTTGTC  
CCACTAATGATCGGGGCCCGACATGGCATTCCCTCGAATGAACAACAT  
AAGCTTCTGGCTTCTTCCACCTTCGTTTCTTCTCCTCCTAGCATCGTCTG  
GAGTTGAAGCCGGAGCCGGAACAGGATGAACAGTCTACCCCCACTAGCC  
GGAAATCTTGCTCACGCAGGAGCCTCCGTGGACTTAACAATTTTCTCTCT  
TCACCTAGCAGGGGTCTCTTCAATTCCTGGAGCAATTAATTTTCACTACTA  
CTATTATTAACATGAAACCCCGACCATCTCCCAATATCAAACACCTCTA  
TTTGTGTGAGCCGTCTCGTTACAGCCGTGCTTCTCCTTCTATCTCTTCC  
AGTGCTAGCCGCTGGAATTACGATGCTCCTGACAGATCGAAACCTTAATA  
CAACATTCCTTCGACCCGGCTGGAGGAGGAGACCCAATTCTGTACCAACAC  
CTGTTCCCCCCCCCCCCCCCCCCCCCCCCCCCCCCCCCCCCCCCCCCCCCC  
NNNNNNNNNNNNNNNNNNNNNNNNNNNNNNNNNNNNNNNNNNNNNNNNNN  
NNNNNNNNNNNNNNNNNNNNNNNNNNNNNNNNNNNNNNNNNNNNNNNNNN  
NNNNNNNNNNNNNNNNNNNNNNNNNNNNNNNNNNNNNNNNNNNNNNNNNN  
NNTTCTGGAGAAGAACTTGCATCCATCCAACCTGCCTGGGCATGCT

CCTGCTGTCTGATGCCACCACTGCACGCAGCTTTTCCAGCTCCTCCTGGA  
GTATGTGCTGAGCAACTTTCCCTGCCATCTGTAAAGACTGAAGAATCCTG  
CAACTCCTAAAGACATGCTAGTCCAGCTACTGTCTCATGAGGAATGGA  
GACTGAGGATGAACGGCTAGTCTATGAATCTGCGCTCAACTGGGTGAAC  
ATGACCTGGAACGTCGGCATTGCCACCTTCCGGAGCTGCTCCGGACAGTG  
CGGCTGGCGCTGCTTCCGTGCATATTCCTGATGGAGAACGTCTCTACAGA  
GGAGCTGATCAATACTCAAGCCAAAAGCAAGGAGCTGGTGGATGAGGCCA  
TCCGATGTAAGCTGCGCATCTACAGAACGATGGGGTGGTCAACAGCCCC  
TGTGCCCGTCCCGTAAACTAGCCATGCCCTTTTCCTACTGGGAGGTCC  
TACCTTCATGTGTGATAAGCTGTACCTGGTGGATCAGAAGGCCAAGGAGA  
TCATTCCTAAAGCTGACATTCCTAGTCCACGAAAGGAGTTCAGCGCTTGT  
GCCATTGGTTGCAAAGTATATGTGACGGGCGGGC--GTGGCTC-CGAAA  
CGGCGTATCCAAAGACGTTTGGGTGTATGACACACTGCATGAGGAGTGGT  
CCAAAGCAGCACCAATGCTAATTGCACGATTTGGCCACGGCTCAGCCGAG  
TTACGGCACTGCCTCTATGTGGTGGAGGTACACGGCTGCAACAGGTG  
CCTTCTGATCGCCGTCTGGACGATTACATAGTGGTTTTTTCAGTCGCTCT  
ACCAATCGGCTAATCCTCAACGAAGCGGAGCTGATCCTGGCTCTCGCACA  
AGAGTTTCAGATGAGGACCATCACTGTGTCTCTGGATGAGCAGTCGTTTG  
CCAGCATAATCCAGATTATCAGCGGGGCATCGATGTTGGTTCAGCATGCAT  
GGGGCCCAACTGATAACCTCCATATTCCTGCCAGAGGGGCTGCTGTGAT  
TGAGCTTCCCTTATGCAGTTAACCCAGAACACTACACACCATAACAAGA

CCCTCGCCTCTTTGCCAGGCATGGACCTCCAGTACGTTGCATGGAGAAAC  
ACAATAGGAGAGAACTCGGTGGCTTACCCTAACCGTCCTTGGGACCAGGG  
TGGCATCGCACATCTGGAGAAGGAAGAGCAGGACCGAATAATGGCCAGCA  
AGGAGGTCCTCGGCACCTGTGTTGCCGTAACCCAGAATGGCTGTTCCGG  
ATCTACCAGGACACTGTTGTGGACGTCCCCTCCTTGGATGTCCTCAG  
---AGAAAGTCTGAAG---GGCAAGCCTAGCCTTAAAA---GACCAAGG  
CTACCAGCACAGTTCATCCCAGTTCGAGAGCCCAAGTGCCAGACA  
TCTGTGCAAGCCACCAACGAGGCCAAGCTGACAGTGTGCGTGGCAGATCCC  
TTGGAATCTCAAGTACCTGAAAGTTCGAGAGGTCAAATACGAAGTGTGGA  
TTCAGAAGAAGGATCTAATAAGGGGACCCTGGAAGATCAGATTATCCAG  
GCTAATCCTGCACTGGAGGCGTTCGGCAATGCCAAAACGGTGAGAAATGA  
CAATTCCTCTCGCTTTGGGAAGTTCATTTCGCATTCATTTCCGGACAAGTG  
GCAAACGTCTTCTGCAGACATAGAAACATACTTGCTTGAAAAATCTCGG  
GTAACATTTTCAGCTTAAAGCGGAGAGGAACATCACATCTTCTATCAGAT  
ATTATCCAATGAAAAGCCAGAGTTACTGGACATGCTGCTGATTACCAATA  
ACCCCTTATGATTACGCATACATCTCCCAAGGAGAAGTAACTGTTGCTTCC  
ATCAATGATAACGAAGAGCTTGTTCGCAACAGACAGTGCCTTTGATGTGCT  
TGGCTTTACTTTCAGATGAAAAGGTAGGGGTCTATAAGTTGACTGGTGCAA  
TAATGCACATATGGCAACATGAAGTTTAAAGCAGAAGCAGCGTGAGGAGCAG  
GCAGAGCCTGATGGAACAGAGTCTGCTGACAAGTCAGCATACTGATGGG  
GCTGAATTCTGCAGATCTTCTAAAGGACTCTGCCACCCAGGGTAAAAG  
TGGGAAATGAATACGTCACAAAAGGTCAGAGCGTCGATCAAGTCTACTAC  
CCCAACAAAGAAGCCTTCAAGTGTGAGGAGTGTGGCAAGCACTATAACAC  
CAAGCTTGGTTATAAGCGTCACGTGGCCATGCACTCCGCCACGGCGGGTG  
ACCTTACTTGAAGGTGTGCCTGCAAAGTTATGAAAGCACGCCGGCCCTC  
CTGGAGCACCTAAAGAGTCACTCGGGTAAGTCGTCGGCGGTACCAAGGA  
GAAGAAGCATCCATGTGACCACTGTGATCGTTCGTTTCTACACGCGCAAGG  
ACGTACGACGCCATATGGTGGTACACACGGGACGCAAGGACTTCCATGTC  
CAGTACTGCGCCAGCGCTTTGGCCGCAAGGACCACCTGACACGGCATGT  
CAAGAAGAGCCACTCGCAGGAGCTGCTGAAGATTAATCGGAACCTCCGG  
ATATGCTGGGTCTTTTGGGGTCAGGCTCACCACCGTGTCTGTCAAAGAA  
GAACTCAACCCTATGATGTGTAGCATGGGACCTGCCAAGGATCCCATGAT  
GACCAAGCCCTTTCCCCAGGAAACCCCTTCCCATGGGTATGTACAACC  
CGCATCAT-----ATCCAGGCCATGTCCAATCCTGGAGTGGGTCAT---  
-----CACCACTCTTTGGTGTCTGGCTCTCTGTCCGCTGCTATGGGAAT  
GAGCTGCCATATGGAGTATCTGATTTATGCCTCCTTTTCCTTTATGGGAT  
GTTTACAAATCAGTGATGGCTCCAACATTTGTGAACCTGTTAGCTAGCAAT  
TCCCCTAGCGTCTCGTTCGCCCTGACCCAACAGAAGTACTTCAGCAACTA  
CAGCCCAGTGATTGGGTTTTACATATATGAGCCATAGAGTACTGGAAC  
CCACTGTGCAGGATCATCTTAAGACTCTGGGCCAGGGTTTTCAATAAGATT  
TCATGGATCGACAATTATTTTCACTACCTGAAGGTAGTGAACGTTAGCGC  
GTCAACCAAAAGTGATTTTATAAACATCCTCAAGAACTCTTTCTGAGGA  
GTCCTGAATATCAGCATTTACGGACGACATCATCTTTTCCAAAA---TC  
GGAG-----ACGAGTACGACATTATTGTGTCCCGGATGTACTT  
GGTCCGACAGAACACGGAAAAGACCAGAGAAGAGGTGGTGGAGCTGCTCG  
AGAGACTCAGACCCCTCTCCCTCATAAACAGCATCAAATTTATTGTCTTC  
AACCCACCTTCATCTTCATGGATCGTTACAGCTCCTCTGTTCATCTCCCC  
TATCCTGACATCAGGCTTCAGTGTCTGACCATCCTCATCCTAACATTTT  
TCCTGGTCATTAATCCACTGGGGAACCTTCTGGTTGATTCTGACCGTTACC  
TCCGTGGAGCTGGGCGTCTGGGTCTTATG-----  
-----TCCAGTTCTTGGGATGTGGGCATCATTG  
ATGGACTGTCTGGTCTTCAACCTCAGTTGACGATTTCCCCGCTGACACC  
ATCTCTCGACGTTTCCGCTATGATGTGGCTCTGGTTTCCGCTTTAAAAGA

CTTGGAAGAGGACATCATGGAAGGCCTGAGAGAGAAGGAACTAGATGACA  
GTGCCTGCACCTCTGGCTTCACTGTTGTGATCAAGGAGTCCTGTGACGGC  
ATGGGAGACGTCACTGAGAAACATGGAGGTGGGCCGGCAGTTCCAGAGAA  
AGCAGTGAGGTTCTCCTTTACAGTGATGTCTATCTCTGTCCAAGCTGAGG  
GTGAAGAT-----GAAGCAGTCACC  
ATCTACCAAGAGCTGAAGCCAACTCTGAACTTTCCCTGCAGGCCCTCTATG  
CCTCATGTTTTGTTGATGAGTCAGACCATGAGACCCTCACTGCAATTCTGG  
GTCCTGTGGTGGCTGAACGCAAAGCCATGCAAGAGAGTCGCCTCATCTG  
TCAATTGGAGGGATGCTTCGCTCCTTCCGCTTTCACTTCCGAGGCACAGG  
ATATGATGAGAAGATGGTACGGGAGCTGGAGGGCTGGAAGCCTCAGGCT  
CCACTTATATCTGTACCCTCTGCGACTCCACTCGGGCTGAGGCCCTCACAC  
AACATGGTGCTGCACTCCATCACCAGGAGCCATGAGGAGAACCCTGAACG  
CTATGAGATCTGGAGGACCAATCCATTTTTCAGAGTCTGTTGAAGAGCTCA  
GAGATCGGGTCAAAGGTGTTTTCTGCCAAGCCCTTTATGGAGACCCAGCCG  
ACCTTAGACGCCCTTCACTGTGACATTTGGCAATGCCACTGAGTTCTACAA  
GATATTCCAGGATGAGATCGGCGAGATGTACCTGAAGAA---CTCC---C  
CAGCACGGGAAGAGAGACGTCGTTGGCGCTCTGCCCTAGACAAAACAGCTG  
AGGAAGAAGATGAAGCTCAAGCCAGTCATGCGGATGAATGGAAACTACGC  
TCGTCGCCTGATGACCCGGGAGGCCGTGGAGGCCGTTTTCGAGCTTGTGC  
CATCACAGGAACGTCGTGAAGCCTTGAGGGAGCTCATGGAGCTATACCTT  
CAGATGAAGCCAGTGTGGCGCTCCACGTGCCCGCCAGGAGTGTCAGA  
TCAGCTCTGCCGTTACAGTTACAACCTCCAGCAATTCGCTGAGTTGCTCT  
CCACCACTTTTCAAGTACCGATACGACGGTAAAATCACCAACTACCTGCAC  
AAGACCTTAGCTCACGTGCCTGAGATTTGTGGAAGGGATGGATCCATTGG  
TGCATGGGCTAGT-----  
NNNNNNNNNNNNNNNNNNNNNNNNNNNNNNNNNNCCCGCAGTGGAAGG  
AGAGCCCCCAGCCTTTCACCTTGCTCTATTGAGGACCCCACCAAACAGACT  
AAGTTCAAGGGCATTAAAGACCTACATATCGTATCGTGTGACCCCTAGCCA  
TACCACCTCGACCCGTTACCAGCCGCTACAACATTTTCGACTGGTTGTATA  
ATCGGCTCCTGCACAAGTTCACTGTCTCATCTCAGTGCCCCATCTACCCGAA  
AAGCAGGCAACTGGGCGCTTTGAGGAGGACTTCATTGAGAAACGCAAAG  
GCGTCTCATCTTATGGATGAACCACATGACCAGTCACCCAGTTCTGTAC  
AGTATGAAGTTTTGAGCACTTCTCATGTGTGGTGATGACAAGCAGTGG  
AAGCTGGGCAAGCGGAGAGCTGAGAAGGATGAGATGGTGGGTGCCCACTT  
CATGCTTACCTTCCAGATCCCAGCGAGCACCAGGATCTACAGGATGTGG  
AGGAGCGTATAGACTCTTTAAAGGCTTCGCCAAGAAAATGGATGACAGT  
GTCATGCAGCTAACACATGTGGCCTCTGAGTTGGTGCGCAAGCACCTTGG  
AGGCTTCCGGAAGGAGTTCCAGAGGCTTGGAATGCTTTCCAATCCATCA  
GCCAGKCTTCCTGCTGGAANNNNNNNNNNNNNNNNNNNNNNNNNNNNNNNNNNNN  
NNNNNNNNNNNNNTAACCTCTCTGGGTTTCATCATCGGTGTC  
GGTGTGGTTGGCAACCTCTTAATTTCATCCTGCTCGTCAAAGACAAGAG  
CCTCCACCGTGCGCCCTACTACTTCTTTTGGACCTGTGTGCCTCTGATA  
TTCTACGCTCAGCCATCTGCTTCCCCTTTGTGTTTCACCTCAGTCAAAAAT  
GGCTCGGCCTGGTCGTACGGCACTCTCACCTGCAAAGTGATTGCCTTCT  
GGGTGTTCTCTCGTGTTCATAACCGCTTCATGCTCTTCTGCATCAGTG  
TCACGCGCTACCTGGCCATTGCCCATCACCAGCTTCTATACCAAGAGGTTG  
ACCTTCTGGACCTGCCTGGCTGTCTGTGATGGTGTGGACACTGTCGGT  
CGCTATGGCATTCCCACCGGTACTGATGTTGGTACCTACTCGTTCATCC  
GAGAGGAAGACCAGTGCACGTTTTCAACACCAGCTCCTTTTCGTGCCAACGAC  
TCGCTGGGCTTCATGCTGCTCCTTGCACCTATTCTCCTGGCCACTCAGCT  
TGTCTACCTCAAGCTCATCTTCTTGTGTCACGACCGCCGGAAGATGAAGC  
CTGTCCAGTTTTGTGCCAGCGGTGAGCCAGAACTGGACCTTCCATGGACCG  
GGAGCCAGCGGCCAGGACAGCAATTGGTTGGCTGGATTTGGCCGTGG

CCCTACCCCGCCACCCTTTTGGGGATCCGGCAGAACAGCAACGCAGCAG  
GCCGCAGGAGATTGCTGGTGTGGATGAGTTTAAAGACTGAAAAGAGGATT  
AGCAGGATGTTCTACATTATGACCTTCTTCTTTCTCAGCTTGTGGGGGCC  
CTACCTGGTGGCTTGCTACTGGAGGGTGTGGCCAGGGGCCCGTGGTCC  
CTGGGGGTTACCTGACAGCCGCTGTGTGGATGAGCTTTGCCCAGGCAGGA  
GTCAACCCCTTCANNNNNNNNNNNNNNNNNNNNNNNGCCAAATCTCGCTTTCACCCTGGCGTCCGGACCG  
GTC

CTGGCACGGACC---GCAGCGTCCACTCAGTAACAGCTTGCTATCACCG  
CAACAAACCGAGGAGACCGCAGTGG---CCTCCCCGAGCGATGGTTTGT  
CACCC---CTGCCAACACCGACTGGACTTTGCCGCCTCGGCATACGATG  
CCGCCGGGCTGCTGATTTTGGCGGTAACGCGGCCACCCTTCTGTCGTAC  
GCAGCTGCTGGAGTTAAGGCGC-----TTCCCTTGCCCACTGCAGGCTG  
CTCCAACAGACCCTTGGGTTATTACGGAGAGCCACCGG---GATGG---G  
GCACGCGCACCTCACCGCAATACTGC-----AGCAAATCCAGCACA  
GTTCTCGCGTGTGGCCATCCAACCTGTGCGGAAGCAGAACGACCA---C  
TTCTAATTACCTGG---CCGGAATGGAAGA---CGGG---GACCC---TA  
TCGCACCTGAGAGGTCACCT---CT---CGGTGGCGCCGAAGAA---GGC  
AAGCCAAAAGACCT-----CTCGGA---ATCCAGCTGGATAGAA---AC  
CCCATCGTCTATTAAGTCTATTGATTCAAGCGATTCTGGGATTTTGT---  
AGCAAGCCAAACGGAGGAGGATTTACCCATCTGCCACACCG-----  
GTTTCAGAGACGTCTCTCCATTAATACTGAA-----CAGGCGA  
CGTTACAGACAGAGAAGTGGCTTTGGGGATAAATCCGTTTCGCCGACGGCA  
TGGGCGCCTTCAAATTAACCACAGCTCTCACGATCTTGGCTCTGG---G  
CAAACGGCGTTTTCTCGCAAGCA---CCCGGTAT---GCAGCTGCTGC  
CCTGGGA---CATCATCA-----TCACCCCACTCATGTCAGCTCC---T  
ACTCCACCGCGCTTCAATTCTACTCGGGACTTTCTTTTTTCGGAATCGG  
GGCTTCGGAGACGCTACCAC-----AGCACAGCACAGTCTTTT  
CGCCTCAGC---CGCGGAAGTTT---T-----GCAGGGCCACATGGAC  
ATTCTGATGCCGACGACACCTGCTCTTCCCAGGACTGCACGAG---CAA  
GCAGCGACGCACGCTCCTCGAACGTAGTGAACAGCCAAATGCGCCTGGG  
GTTTTTCAGGGGACATGTATGGCAGAGCTGAGCAATACGGTCACGTTACGA  
GCCCCAGGT---CCGAGCATTATGCCTCCACTCAGTTGCATGGCTATGGC  
CCCATGAACATGAATATGGCTGCC---CATCACGGTGTGGGGCCTTCTT  
TCGTTATATGAGACAACCGATCAAACAAGAGCTCATCTGCAAGTGGGTCG  
AACCGGAGCAACTGACAAATCCGAAAAAGTCGTGCAACAAAACCTTTCAGC  
ACCATGCATGAACCTGGTGACCCACATCACAGTGAACATGTTGGGGGACC  
AGAACAATCGAATCACATTTGTTTTTGGGAAGAGTGTTCGCGAGAAGGAA  
AGCCATTTAAAGCCAAGTACAAACTTGTAATCATATCAGAGTGCACACC  
GGAGAAAACCGTTCCCTTGCCCATTTCCGGG-----

>Chauliodus danae  
AGCCTGCTAATTCCGGCAGAACTCAGCCAGCCCGGTGCATTTATGGGCGA  
CGACCAGATCTACAACGTTATCGTTACAGCACATGCCTTCGTTATAATTT  
TCTTCATAGTAATAACCCATTATGATCGGGGGTTTCGGAAACTGGTTAATC  
CCTCTAATAATTGGGGCCCCCTGACATAGCCTTCCCCGAATAAACAACAT  
GAGCTTCTGACTTCTCCCTCCCTCATTTCTTCTTCTACTCGCCTCTTCCG  
GGGTAGAAGCTGGGGCCGGGACCGGATGAACTGTATACCCACCCCTTTCA  
GGCAACCTCGCTCACGCTGGTGCCCTGTGTTGACCTTACAATTTTCTCCCT  
CCACCTTGCAGGAATCTCTTCTATCTAGGAGCAATTAATTTCTACTA  
CTATTTATAATATGAAACCCGCGGTATATCCCAATACCAGGCTCCCTG  
TTCGTGTGATCTGTTCTCATTACTGCTGTTCTTCTCCTTCTATCCCTACC  
CGTCTAGCCCGCGGAATTACCATGCTTCTTACAGACCGAAACCTTAACA  
CAACCTTCTTCGATCCTGCAGGGGGTGGAGACCCCATCCTTTACCAGCAC  
CTCTTCTGATTCTTCGGCCACCCTGAGGTCTATATTTCTCATTCTCCGGG









CACGAG---CAAGCCGCGAGCCACGCGTCCTCGAATGTGGTTAACAGCCA  
GATGCGGCTGGGGTTTTCGGGGACATGTACGGGAGAGCCGACCAGTATG  
GCCACGTTACGAGCCCGCGGT---CCGACCACTACGCTTCGACCCAGTTG  
CACGGCTATGGCCCTATGAACATGAATATGGCCGCG---CACCACGGAGC  
CGGGCCTTCTTCCGTTACATGAGGCAGCCGATCAAGCAAGAGCTCATCT  
GCAAGTGGATCGAGCCGGAGCAACTATCGAATCCTAAAAAGTCGTGCAAC  
AAAACTTTTAGCACGATGCACGAGCTGGTGACCCACTTGACGGTGGAGCA  
TGTGGGGGGACCCGAGCAGTCCAACCACATTTGCTTCTGGGAAGAGTGCG  
CCCGAGAAGGAAAAGCCCTTCAAAGCCAAATTCAAAACTTGTGAACCACATC  
CGAGTGCACACCGGAGAGAAGCCGTTTCCTTGTCCGTTTCCTGGCTGTGG  
CAA

>Chaunax suttkusi

-----  
-----  
-----  
-----  
-----  
-----  
-----  
-----  
-----  
-----  
-----  
-----  
-----  
-----  
-----

-----TTCTAGAGCGAAACCTTCACCCATCTAACTGCCTTGG  
CATGCTGTTGCTGTCTGACGCACACCAGTGCACCAAGCTGTCGGAGCTCT  
CCTGGGGCATGTGCCCTCAGCAACTTCCCGCTATTTGCAAGACAGAGGAC  
TTTTCTCAAACCTCCAAAAGATATGGTGGTGCAGCTTTTGTACATGAGGA  
GTTAGAGACTGAAGATGAGAGACTTGTATGAAGCTGCCCTCAATTGGA  
TCAAATATGACCTGAAAAAGAGGCACTGCCACCTCCAGAGCTTTTGAGA  
ACGGTCCGTCCTGGCCCTGCTGCCCGCCATCTTTCATGGAGAATGTCTC  
TACAGAAGAGCTGATCAATGCCCAGGCCAAGAGCAAGGAATTGGTGGATG  
AAGCTATCCGCTGTAAGCTGAAGATCTTGCAGAATGATGGCGTTGTAAAC  
AGCCCGTGTGCTCGACCAAGAAAAACAAGCCATGCCCTTTTCTCTGGG  
CGGTCAGACATTATGTGTGACAAGTTGTATCTGGTGGACCAGAAAGCCA  
AAGAGATCATCCCCAAGCTGACATTCAGCCCCAGGAAGGAGTTCAGC  
GCCTGTGCCATCGGCTGTAAGGTGTACATCACTGGAGGGA--GAGGCTC-  
AGAGAATGGTGTGTCCAAGATGTATGGGTCTACGACACAGTTCAAGAGG  
AATGGTCAAGGCCGCACCCATGCTCATTGCAAGATTTGGCCATGGCTCT  
GCAGAGCTTAAACTGCCTCTACGTGGTAGGAGGTCACACTGCAGCAAC  
TGGCTGCCTCCCAGCCTCTCCATCTGGATGAATACATTGTTGTGTTAGT  
CGTTCAACAACGAGACTGATACTGAATGAAGCGGAGCTCATCATGGCACT  
GGCTCAGGAGTTCCAGATGAGAGTGGTCCAGTGTCCCTGGAGGAACAGT  
CATTCACTAGTATCATCCAGGTGATCAGCAGTGCTACCATGTTAGTCAAT  
ATGCATGGAGCTCAACTTATTACCTCGCTCTTCCTCCCCAGAGGAGCTGT  
TGTGGTGGAGCTGTTCCCCTTTGCTGTGAACCCAGAGCAGTACACCCCAT  
ATAAAACTTGCCTCCCCTTCCGGCATGGACCTTCATTATATCTCCTGG  
AGGAACACTAAGGAGGATAACACTATCACCCACCCAGACAGGCCCTGGGA  
ACAAGGGGGTATCGCTCATTTGGATAATGAGGAGCAAGAACGAATACTGA

CGAGTAAAGATGTGCCAGGCATCTGTGTTGCCGAAACCCAGAGTGGCTC  
TTCCGGATCTATCAGGACACATTGGTGGACATTCCCTCCTTCTGGAAGT  
CCTCAA---AGAGGACATGAAG---ACAAAGCCCAACTTGAGGAA---GT  
CAAAGCCGGCCAGCACACTCCACCCTGGCCGGGTCAGAGAACCTCAGTGT  
CAGACTTCAGTTCAAACCAGTAATGAGGCTAAACTCACAGTCTCCTGGCA  
GATACCGTGGAATCTGAANNNNNNNNNNNNNNNNNNNNNNNNNNNNNNNNNN  
ACCAACAAGGGGACCCCTGGAGGA  
TCAAATCATCCAAGCAAACCCTGCATTTGGAGGCTTTTGGCAACGCAAAAA  
CAGCAAGAAATGATAACTCATCACGTTTTGGAAAAGTTCATCCGAATTCAC  
TTTTGGTACAAGCGGCAAGCTGTCACTGTCTGACATCGAAACGTACCTGCT  
GGAGAAGTCCCAGTACCTTTTTCAGTGAAGGCTGAGAGAAATATCACA  
TTTTCTACCAGATCCTGTCAAATCAGAAACCAGAGCTGCTGGACATGCTG  
CTGATCACCAACAATCCCTATGACTATTCCCTACATCTCCCAAGGAGAGGT  
AACTGTGCGCTCCATCAACGACTCAGAAGAGCTGATGGCCACGGACAGCG  
CCTTCGATGTGCTCGGCTTCACTCCAGAGGAGAAGATGGGCGTCTATAAA  
CTCACGGGTGCCATCATGCACTATGGCAACATGAAATTCAAACAAAAGCA  
GCGTGAGGAGCAGGCTGAGCCAGATGGGACGGAGGCTGCTGATAAATCAG  
CTTACCCTAATGGGGCTGAACTCTGCTGACCTCATCAAAGGGCTGTGTTCAT  
CCCAGAGTCAAGGTAGGAAATGAATANNNNNNNNNNNNNNNNNNNNNNNNN  
AGGAGGCCTTCAAATGT  
GATGAGTGTGGGAAGCACTACAACACCAAGCTGGGATATAAGCGCCATGT  
TGCCATGCATTAGCCACGGCGGGGATCTCACCTGTAAAGTGTGCATGC  
AGACCTACGACAGCACACCATGCTCTTGGAGCACCTGAAGAGCCACTCT  
GGGAAGTCCCTCAGGTGGCACCAGGAGAAAAACACCAGTGCACCCTG  
TGACCGGCGTTTTCTACACAAGGAAGGACGTGAGACGGCACATGGTTGTCC  
ACACGGGCCGAAAGACTTCCCTCTGCCAGTACTGTGCGCAACGCTTTGGC  
AGGAAGGACCATCTGACACGCCATGTGAAGAAGAGCCACTCACAGGAGCT  
GCTGAAAATCAAGACAGAGCCTCCTGATATGTTAGGCTTTTTAGCTTCTG  
GGTCACCACCGTCTCTGTGAAGGAGGAGCTCAGCCCATGATGTGCGGT  
ATGGGCCCAAACAAGACCCCATGATGAGCAAACCCTTTCCGAGTGGGGC  
CCCTTTTCCAATGGGCATGTACAACCCTCATCAT-----CTCCAGGCCA  
TGCTAATTTCTGGGGTAGGTCCTCA-----  
CACCCGTCCNNNNNNNNNNNNNNNNNNNNNNNNNNNNNNNNNNNNNNNNNN  
NNNNNNNNNNNTCATTCAT  
GGGATGTTTACAGATCAGTGTGATGATCAAATATCGTGAACCTGCTGGCGA  
GTAACTCTCCAAGTGTTCATATGCTCTGACCCAGCAAAAATACTTCAGT  
AACTATAGTCCAGTCAATGGGTTTTACATTTATGAGCCCATCGAGTACTG  
GAACTCCACAGTGCAGGAGCACCTGAAGACTCTGAGTCATGGCTTCAATA  
AGATCTCCTGGATAGACAACCTTTTCCACTACCTGCGGGTGGTGAATGTG  
AGTGCATCAACCAAGAGCGACTTTCATCACCATCCTCAAGGGCTCCTTCTC  
GCGCAGCCCGGAGTACCAGCACTTCAACCGAGGACATCATTTTCTCAAAGA  
---ACCGTGAGACCG-----ATGAGTACGACATCATCGCCTCGCGGATG  
TACTTGGTGGCACGGACCACGGAGAAGAAGCGTGAAGAAGTGGTGGAGCT  
CCTGGAAAACCTTCGTCCTACTGATGCTGATCAACAGCATCAAGTTCATTG  
CCTTCAATCCTACGTTTTGTGTTTATGGACCGCTACAGCTCCTCCGTCATC  
TCACCCATCCTGACGTCAGGATTCAGCGTACTCACAACTCCTCATCCTCAC  
TTTCNNNNNNNNNNNNNNNNNNNNNNNNNNNNNNNNNNNNNNNNNNNNNN  
NNNNNNNNNNNNNNNGGTTTTACCAGTTTTGAGTGGCAGCCAGTTCCTCAAGAATGTGTCTA  
CATCTTGCAATGTTGGCATTATTAATGGTCTCTCTGGATGGGATTCCTCG  
GTGGATGACTTCCAGCTGACACCACTCGACGGTTTTCGCTATGATGT  
GGCACTAGTATCAGCATTAAAGGATCTGGAGGAGGACATCATGGAGGGAC  
TGAGAGAGAATGGAATGGAAGACAATGCTCACA-----ACTTCACTGTT  
ATGATCAAAGAATCCTGTGATGGCATGGGCGATGTCAATGAGAAGCATGG

TGGAGGACCAGCTGTCCCTGAGAAGGCTGTGCGTTTCTCTTTCACTGTTA  
TGTCGTCTCTTTTCGTAGCAGACAGTCAGGAG-----  
-----GAAGAGGTCGCCATCTTCACAGAGCCAAAGCCAAACTC  
AGAACTGTCCTGTAAGCCCTTTGCCGTGATGTTTGTGGATGAATCMAACC  
ATGAGACTCACAGCCATCCTGTGTCCTTTAATTGCAGAGCGTAACGCA  
ATGAAAGAGAGCAAGCTCATCCTGTCCATCGGTGGACTTCTTCGCTCCTT  
CTGCTTTCACCTTAGAGGGACAGGATATGATGAGAAGATGGTGCCTGAGA  
TGGAAAGGCTTTGAGGCCTCTGGGTCCACCTACATCTGCACTCTCTGTGAC  
TCCAGTCGTGCAGAGGCCTCTCAAAACATGGTGCCTGCACTCCATCACCCG  
CAGTCATGAAGAGAACCCTAGAACGTTATGAAATGTGGAGAACCAACCCAT  
TTTTCTGAGTCTGTAGATGAGTTGCGAGATAGAGTCAAAGGAGTCTCTGCC  
AAGCCCTTCATGGAGACCCATCCCACACTGGATGCCCTTACACTGTGACAT  
CGGCAATGCCACTGAGATGTACAAAATATTCCAAGATGAGATTGGGGAGG  
TGTACAAAAGGT---CAAT---CCCAGCCGGGAGGAGCGGCGGGGCTGG  
AGGACAGCCTTAGATAAACAGCTGAGGAAGAGGATGAAGCTCAAACCAGT  
AATGAGGATGAATGGGAACTATGCCCGCAGGCTAATGACCCTGGAGACTG  
TGGAGGTGGTGTGTGAGCTGGTGCCCTCGGAGGAGAGGAGAGAGGCCCTG  
AGGGAGCTTATGAAACTCTACATCCAGATGAAGCCTGTGTGGCGGCCAC  
CTGTCCAGCCAAGGAGTGCCCTGACCAGCTGTGCCGCTACAGCTTTAACT  
CCCAGTGCTTTGCTCAGGTCCTCTCCTCTAAGTTCAAATATAGATACAAT  
GGAAAGATAACCAATTACCTGCATAAGACTCTGGCTCATGTGCCGTGAAT  
CATAGACAGAGATGGATCCATAGGAGCCTGGGCCAGCGANNNNNNNNNNNNNNNNNNNNTCTTACACC  
AT

CGAGATGGGTCCCTTGGGGCCCCGATGGAAGGAGAGCCACAGCCGTTCT  
CCTGCTCCATTGAAGACCCACAAAACAGACAAAGTACAAGGGCATCAAG  
ACGTACATTTTCGTACCGGGTGCACCCGAGCCACACTGGGCATCCTGTCTA  
CAGACGCTACAAACACTTTGACTGGCTGTACAACCGTTACTGCACAAGT  
TCACTGTGATCTCCGTGCCTCACCTGCCTGAGAAGCAGGCCACGGGGCGA  
TTTGAGGAAGACTTCATCGAGAAGCGCAAGAGGCGACTGATACTGTGGAT  
GAACCACATGACCAGTCAACCAGTCTCTCCAGTATGAAGGGTTCGAGC  
ACTTCTGATGTGTGCTGATGACAAGCAGTGGAAACTGGGTAAGAGACGG  
GCAGAAAAAGACGAGATGGTGGGTGCCATTTTCATGCTGACCCTTCAGAT  
CCCTAACGAGCACCAGGACCTTCAGGATGTTGAGGAGCGGATCGACTCCT  
TCAAGTCCTTTGCTAAGAAGATGGATGACAGTGTGATGCAGCTCACACAT  
GTGGCCTCAGAGCTGGTGCCTAAGCACCTGGGTGGGTTTCAGGAAGGAGTT  
CCAGAGGCTGGGAAATGCCTTCCAGTCAATCAGCCAGGCATTCATGCTGG  
ACCCTCCCCACAGCTCACAGAACTTAAACAACGCCATCTCCATNNNNNNNNNNNNNNNNNNNNNNNNNN  
NNNNNTGGGTT

TCATCATCGGAGTCGGTGTGGTTGGAAACCTCCTGATCTCCATCCTGCTG  
GTCAAAGACAAGAGCCTGCACCGAGCGCCCTACTATTTCCCTGCTGGACCT  
GTGCGCCTCTGACATCCTGCGCTCCGCCATCTGCTTCCCCTTTGTCTTCA  
CCTCGGTCAAGAATGGATCTGCCTGGACCTATGGCACGCTCACCTGCAA  
GTGATCGCCTTCCCTGGGTGTGCTCTCCTGTTTCCACACGGCGTTTATGCT  
ATTCTGCGTGAGCGTCACGCGCTACCTGGCCATAGCGCATCACCGTTTCT  
ACACCAAGAGGCTGACCTTCTGGACCTGTCTAGCCGTCATCTGCATGGTG  
TGGACGTTGTGGTGGCTATGGCGTTCCCAGGAGTCTAGACGTAGGGAC  
GTACTCGTTTATCCGGGAGGAGGACCAGTGCACGTTCCAGCACCGCTCGT  
TCAGGGCAATGATTCGCTGGGCTTCATGCTCCTGCTGGCGCTCATCCTC  
CTGGCCACACAGCTGGTTTACCTCAAGCTCATCTTCTTCGTCCACGACCG  
TCGAAAGATGAAGCCTGTCCAGTTCGTGCCTGCTGTCAGCCAGAAATGGA  
CCTTCCACGGGCCAGGCGCCAGCGGGCAGGCAGCGGCAACTGGCTGGCA  
GGATTCGGTCGAGGCCCCACCCACCTACTTTGCTGGGCATTCGGCAGAA  
CAGCAACGCAGCGGGCCGAGGCGTCTACTGGTATTGGATGAGTTCAAA

CAGAGAAGAGGATTAGTAGGATGTTCTACATCATGACGTTTTTCTTCCTG  
GCGCTGTGGGGGCCCTATCTGGTTGCTTGCTACTGGCGGGTGTGGCAAG  
GGGCCCCGTGGTCCCTGGGGGCTACNNNNNNNNNNNNNNNNNNNNNNNNNNNNNNNNNNNNNNNNNNNNNNNNNNNNNNNNNNNNNN  
NNNNNNNNNNNNNNNNNNNNNNNNNNNNNNNNNNNNNNNNNNNNNNNNNNNNNNNNNNNNNNNNNNNNNNNNNNNNNNNNNNNNNNNN  
NNNNNNNNNNNNNNNNNNNNNNNNNNNNNNNNNNNNNNNNNNNNNNNNNNNNNNNNNNNNNNNNNNNNNNNNNNNNNNNNNNNNNNNN  
ACTGGTCTGGCAGGAGC---GCAGCGTCCCCTCGGCAACAGCTTGCT  
ATCCCCGAGCAAACCGAGGAGCCACTGTTGCCACCCCCCGCAGCGAT  
GGTTTGTCAACC---CTGCCAACACCGACTGGACTTTGCTGCCTCGGCA  
TACGACGCCGCC-----GATTCGCCGGTAACGCGGCCACCTTGCT  
GTCCTACGACGCGGCCGGAGTGAAGGCTC-----TCCCCCTGCCGGCTG  
CAGGCTGCTCCAATCGGCCTCTTGGCTATTACGCAGACCCGTCAG---GC  
TGG---GGAGGACGCACGCCGCTCAGTACTGTGGCGTGAATAGCAAATC  
CAGCTCGGTCTTTTCTGCTGGCCCTCTAACACTATCGGAGGCAGAGTGG  
GGA---CC---AACTACCTGG-----CCGAGGA---GGGA---GAC  
TC---AATCCCCACAGAGAGGTCAACG---AT---CGGCGGCTCGGAGGA  
G---GCCAAACCCAAAGATATCAC---ATCAGA---GTCGAACTGGATAG  
AG---ACGCCGTACATCTATTAAGTCCATCGATTCTAGCGACTCTGGGATC  
TTTG---AACAGGCCAAAAGGAGACGGATCTCACCTTGTCTNNNNNN-----  
-

NNNNNNNNNNNNNNNNNNNNNNNNNNNNNNNNNNNNNNNNNNNNNNNNNNNNNNNNNNNNNNNNNNNNNNNNNNNNNNNNNNNNNNNN  
CGCTGGGGATAAATCCGTTTCGCGGATGG  
GATGGGCGCCTTCAAATAAACACAGCTCCACGATATTGGCTCCGG--  
-ACAAACGGCGTTTTCTCCAGACG---CCCGCTAT---GCAGCAGCC  
GCCCTGGGA---CACCATCA-----CCACCCGACCCACGTTGGCTCT--  
-TACTCCACGGCTGCTTTCAACTCCACCAGGGACTTTCTCTTCAGAAATC  
GAGGATTCGGGGACGCCACCGG-----AGCGCAGCACAGTTTG  
TTCGCCTC-----CGGGAGTTT---C-----GCAGGGCCACACGG  
ACACTCAGATGCAGCAGGGCACCTGCTCTTCCCCGGGCTCCACGAG---C  
AAGCGGCGAGCCATGCGTCTTCCAACGTGGTCAACAGCCAGATGCGGCTG  
GGCTTCTCGGGGACATGTACGGACGGCCGACCAGTATGGCCACGTTAC  
AAGCCCGCGGT---CCGACCACTATGCTTCGACCCAGTTGCACGGCTACG  
GCCCTATGAACATGAATATGGCCGCA---CACCACGAGCAGGGCCCTTC  
TTTCGATACATGAGGCAGCCGATCAAACAAGAGCTCATCTGCAAGTGGAT  
CGAGCCGGAGCAGCTGACGAATCCCAAAAAGTCGTGCAACAAAACTTTTA  
GCACGATGCACGAGCTCGTGACCCATCTGACGGTGGAGCATGTTGGNNNNNNNNNNNNNNNNNNNNNNNNNNNNNNNNNNNNNNNN  
NNNNNNNNNNNNNNNNNNNNNNNNNNNNNNNNNNNNNNNNNNNNNNNNNNNNNNNNNNNNNNNNNNNNNNNNNNNNNNNNNNNNNNNN  
NNNNNNNNNNNNNNNNNNNNNNNNNNNNNNNNNNNNNNNNNNNNNNNNNNNNNNNNNNNNNNNNNNNNNNNNNNNNNNNNNNNNNNNN

>Chelmon rostratus  
AGCCTACTTATTCGAGCAGAAGTCAACCAGGAGCTCTTTTAGGGGA  
TGACCAGATTTATAATGTTGTTGTAACAGCACATGCGTTTGTAATGATTT  
TCTTTATAGTAATAACCAATTATGATTGGCGGCTTCGGAACTGACTTATT  
CCACTAATAATTGGAGCCCCCGATATGGCCTTCCCACGAATAAATAACAT  
AAGCTTCTGGCTTCTCCACCCTCCTTTTTCTACTACTTGCCTCTTCTG  
GCGTAGAGGCTGGGGCCGGCACTGGCTGAACTGTTACCCCCATTAGCA  
GGCAACCTCGCACACGCGGGAGCTTCTGTTGACCTGACCATTTTCTCCCT  
TCATTTAGCAGGAATTTCTTCCATCTCGGTGCCATTAACCTTTATACTA  
CAATTATTAATAAACCCTGCTATAACTCAATATCAAACCCCTTTA  
TTTGTATGATCCGTTCTTATCACAGCCGTTTTACTCCTGCTGTCCCTTCC  
TGTAATTGCCGCTGGGATTACCATGTTACTAACAGATCGTAACCTGAATA  
CAACCTTCTTGATCCTGCGGGGGGAGGAGATCCTATTCTGTACCAACAT  
CTT-----  
-----  
-----  
-----  
-----

-----TTCCTAGAGAGAAACCTTCACCCATCTAACTGCCTTGG  
CATGCTGTTGCTGTCTGATGCCACCAGTGCACCAAGCTGTCAGAGCTCT  
CCTGGGGCATGTGCCCTCAGCAACTTTCCCGCTATTTGCAAGACAGAGGAC  
TTCTCCAACCTGCCCAAAGATATGGTGGTGCAGCTTTTGTACATGAGGA  
GCTAGAGACAGAAGATGAGAGACTGGTTTATGAAGCTGCCCTGAACTGGA  
TCAACTATGACCTGGAAAAGAGGCAC TGCCACCTTCCAGAGCTCCTGAGA  
ACGGTCCGTCTGGCCCTGCTGCCTGCCATCTTTCTCATGGAGAACGTATC  
TACAGAAGAGCTGATCAACGCCAGGCCAAGAGCAAGGAGCTGGTGGATG  
AAGCTATCCGCTGTAAGCTAAAGATCCTGCAGAATGATGGCGTTGTTAAC  
AGCCCGTGTGCCCGACCAAGAAAAACCAGCCATGCCCTCTTTCTCCTGGG  
AGGACAGACTTTCATGTGTGACAAGTTGTACCTGGTGGACCAGAAAAGCCA  
AAGAGATCATCCCCAAGGCTGACATCCCCAGCCCCAGGAAGGAGTTCAGC  
GCYTGCGCCATCGGATGTAAGGTGTACATCACTGGTGGAA--GAGGCTC-  
AGAGAATGGTGTGTCCAAAGATGTATGGGTCTACGACACAGTCCACGAGG  
AATGGTGAAGGCGGCCCATGCTCATCGCCAGGTTTGGCCACGGCTCT  
GCGGAACTGAAACACTGCCTCTACGTGGTGGGAGGTCACACGGCTGCAAC  
TGGCTGCCTCCCGGCTTCCCGTCTGGATGACTACATTTGTGGTGTTTAGT  
CGCTCAACAACGAGGCTGATACTGAATGAAGCAGAGTTAATCATGGCGCT  
AGCCCAAGAGTTCCAGATGAGAGTGGTACCGGTGTCTCTGGAGGAACAGT  
CTTTCCCGAGTATAGTCCAGGTGATCAGCGCTGCCACCATGTTGGTCAAGT  
ATGCATGGAGCTCAGCTCATCACCTCACTCTTCCCTTCCAAGAGGAGCTGT  
TGTGGTGGAGCTGTTCCCTTTTGTGTAAACCCAGAGCAGTACACTCCGT  
ATAAAAACCTTGCCCTCCCTCCCAGGCATGGACCTTCACTATGTCTCTTGG  
AGGAACACCAAGGAGGAGAATACCATCACGCATCCAGACAGACCCCTGGGA  
ACAAGGGGGCATCGCTCACTTGGAGAAGGAGGAGCAAGAGCGAATACTGT  
TGAGCAAAGATGTCCCCAGACACCTGTGCTGCCGCAACCCAGAGTGGCTC  
TTCCCGATCTACCAGGACACTTTGGTAGATATCCCTTCCTTCCCTGGAAGT  
CGTCAA---AGAGGGCATGAAG---ACAAAGCCCAACTTGAAGAA---GT  
CAAAGCCGGCCAACACAGTCCACCCGGGCCGGGTCAGAGAACCCCAAGTGT  
CAAACCTCAGTACAAACCACTAATGAGGCTAAACTCACAGTCTCCTGGCA  
GATCCCGTGGAAATCTGAAATACCTTAAGGTGAGAGAGGTGAAATACGAGG  
TGTGGATCCAGAAAAAAGATAACCAGCAAGGGGACTCTGGAGGATCAAATC  
ATCCAGGCAAACCCCTGCGTTGGAGGCTTTTCGGCAATGCCAAAACGTTGAG  
AAATGACAACCTCATCTCGGTTTGGAAAATTCATCCGAATTCACTTTGGTA  
CGAGCGGCAAGCTGTCTGCTGCCGACATTGAGACATACCTGCTGGAGAAG  
TCACGGGTCACCTTTCAGCTCAAGGCTGAGAGGAATTACCACATCTTCTA  
CCAGATCCTGTCCAATCAGAAGCCAGAGCTGCTCGACATGCTGCTGATCA  
CCAACAACCCGTACGACTACTCCTACATCTCCAAGGAGAAGTGACGGTC  
GCCTCCATCAACGACTCAGAGGAGCTGATGGCCACGGACAGCGCCTTTGA  
TGTGCTCGGCTTCACTCCGGATGAGAAGATGGGTGTCTATAAACTGACAG  
GCGCCATCATGCACTATGGCAACATGAAGTTCAAACAGAAGCAGCGTGAG  
GAGCAGGCTGAGCCAGATGGGACGGAGGCTGCTGATAAATCAGCTTACCT  
AATGGGTCTGAACTCTGCCGACCTCATCAAAGGGCTGTGCCACCCCAAG  
TCAAAGGTAGGAAATGAATATGTCACCAAAGGCCAAAGTGTAGACCAAGTC  
TACTACCCCAACAAGGAGGCCTTCAAGTGTGAGGAGTGTGGGAAGCACTA  
CAACACGAAGCTGGGATATAAGCGGCATGTGGCCATGCACTCTGCCACGG  
CAGGGGATCTCACCTGTAAAGTGTGCATGCAGACCTATGAGAGCACGCCT  
GTGCTCCTGGAGCACCTCAAGAGCCACTCCGGGAAGTCTTCAGGTGGCAC  
CAAGGAGAAAAAGCACCCGCTGTGACCACTGTGACCGTCTGTTTCTACACAC  
GGAAGGATGTGAGACGGCACATGGTGGTCCACACGGGCGGAAAGGACTTC  
CTGTGCCAGTACTGTGCCCAACGCTTTGGCAGAAAAGGACCATCTGACTCG  
CCACGTGAAGAAGAGCCACTCACAGGAGCTGCTGAAAATCAAGACGGAGC  
CTCCGGATATGTTAGGGCTTTTAGCTTCTGGGTCAACCACCTTGTCCGTC

AAGGAGGAGCTCAGCCCCATGATGTGTGGCATGGGTCCCAACAAAGACCC  
CATGATGGGCAAGCCGTTCCCCAGTGGAGCCCCTTTTCAGATGGGCATGT  
ACAACCCCCACCAT-----CTCCAGGCCATGTCTAATTCTGGGGTGGGT  
CACCCA-----CACCCGTCCCTGATGCCCGGTCCCTTGTCTGCAGCTAT  
GGGCATGGGTTGTCACATGGAATATCTCATCTACGCCTCCTTCTCGTTCA  
TGGGATGTTTTACAAAACAGTGACGGGTCAAATATCGTGAACCTGCTGGCG  
AGTAACTCTCCGAGCGTTTTCGTATGCTCTGACCCAGCAAAAATACTTCAG  
TAACTACAGTCCTGTGATTGGGTTTTACATTTATGAGCCCATAGAGTACT  
GGAACTCCACAGTGCAGGAGCACCTGAAGACTCTGAGTCATGGCTTCAAC  
AAGATCTCCTGGATGGACAACCTTTTTCCACTACCTGCGGGTGGTGAATGT  
GAGTGCCTCAACGAAGAGCGACTTCATCACCATCCTCAAGGGCTCCTTCC  
TGCGCAGCCCGGAGTACCAGCACTTCACCGAGGACATCATATTTCCAAG  
A---ACGGGAGACCG-----ATGAGTACGACATTATCGCCTCGCGGAT  
GTACTTGGTTGCACGGACGACAGAGAAGAAGCGCGAGGAGGTGGTGGAGC  
TGCTGGAGAAGCTTCGTCCGCTGATGCTGATCAACAGCATCAAAATTCATC  
GCCTTCAATCCTACGTTTGTGTTTCATGGACCGGTACAGCTCCTCTGTTCAT  
CTCGCCCATCCTGACCTCAGGATTCAGCGTACTCACAATCCTCATCCTCA  
CTTTCTTCCCTGGTCATCAACCCCTTGGGGAACCTTCTGGCTCATCCTCACT  
GTAACGTCCGTTGGAGCTGGGTGTCTTGGGTTTTGATGGGCTTTTACCAGTT  
TGAATGGCAGCCTGCTCTCAAAAATGTGTCTGCATCTTGCAATGTTGGCA  
TTATTAATGGGCTCTCTGGATGGGCTTCCTCAGTGGATGACTCCCTGGCT  
GACACTATCACTCGGCGGTTTTCGCTATGATGTAGCACTGGTGTGAGCATT  
AAAAGATCTGGAGGAGGACATCATGGAGGGGCTGAGAGAGAGTGGGATGG  
AAGACAGCGCTTGCACCTCAGGCTTCAGTGTGATGATCAAGGAATCTTGT  
GATGGCATGGGTGATGTGAGTGAAGCACGGTGGAGGACCAGTTGTTCC  
TGAGAAGGCTGTACGTTTCTCTTTCATATTATGTCTGTCTCTATCCTGG  
CAGCTGACAAGGAG-----GAAGAG  
GTTACCATCTTCATGGAGCCAAAGCCAAACTCAGAATTGTCCTGTAAGCC  
CCTTTGCCTGACATTTGTGGATGAGTCAGACCATGAGACGCTCACAGCCA  
TCCTGCGGCCTATAGTCGCAGAGCGTAATGCAATGAAAGAGAGCAGACTC  
ATCCTATCCATCGGTGGACTGCTTCGCTCCTTCCGCTTTTCACTTCAGAGG  
TACAGGTTACGATGAGAAGATGGTGCCTGAGATGGAGGGCCTTGAGGCCT  
CACGGTCCACCTATGTCTGCACTCTGTGTGACTCTGGTTCGGGCAGAAGCT  
TCTGAAAACATGGTGCTACACTCCATCACTCGCAGCCATGAAGAGAACCT  
AGAACGTTACGAAATATGGAGAACCAACCCCTTTTCTGAGTCTGCAGATG  
AGCTGCGAGACAGAGTCAAAGGGGTCTCCGCCAAGCCCTTCATGGAGACC  
CATCCCACAATGGATGCATTACATTGCGACATAGGCAATGCCACTGAGTT  
CTACAAAATCTTCCAGGATGAGATCGGGGAGGTGTACCAAAAGGC---CA  
AC---CCCAGCCGGGAGGCGCGGCGCAGCTGGAGGGCAGCCCTAGATAAA  
CAGCTGAGGAACAAGGTGAAGCTGAAACCAGTAATGAGGATGAATGGGAA  
CTTTGCCCCCGGCTAATGACCCTGGAGGCTGTGGAGGCAGTGTGTGAGC  
TGGTGGCCTCTGAGGCGAGGAGGGAGGCCCTGAGGGAGCTTATGAGGCTT  
TACCTCCAGATGAAGCCTGTGTGGCGGCCACCTGCCAGCCAAGGAGTG  
CCCCGACCAGCTGTGCCGCTACAGCTTTAATTCCCAGCGCTTTGCTGACC  
TCCTCTCCTCTACCTTCAAATATAGGTACAATGGAAAGATAACCAATTAC  
CTGCACAAGACCTTGGCCCATGTGCCGAAATAATAGAGAGAGATGGATC  
CATAGGAGCCTGGGCCAGCGAGGGCAACGAGTCCGGCAAACAAATCGTACA  
CCATCGAGATGGGTCCCTTAGGGCCCCGGTGGAAAGGAGAGCCACAGCCT  
TTCTCCTGTTCCATTGAAGACCCCACTAAGCAAACAAAGTTCAAGGGCAT  
CAAGACGTACATTTTCGTACCGTGTACGCGGAGCCACACTGGGCATCCTG  
TATACAGGCGCTACAAACACTTTGACTGGCTGTACAACCGCTTACTGCAC  
AAGTTCACTGTGATCTCTGTGCCTCACCTGCCCCGAGAAGCAGGCCACGGG  
GCGATTTGAGGAAGACTTCATCGAGAAGCGCAAGAGGCGACTGATACTGT

GGATGAACCACATGACCAGTCACCCAGTCCTCTCCAGTATGAAGGCTTC  
GAGCACTTTCTGATGTGTGCTGATGACAAGCAGTGGAACCTGGGCAAGAG  
ACGGGCGGAGAAGGACGAGATGGTGGGTGCCATTTTCATGCTGACCCTCC  
AGATCCCTAACGAGCACCAGGACCTTCAGGATGTAGAGGAGCGGGTGGAC  
TCCTTCAAGGCCTTCGCTAAAAAATGGATGACAGCGTGATGCAGCTCAC  
GCATGTTGCCTCGGAGCTGGTGCCTAAGCACCTCGGTGGGTTTAGGAAAG  
AGTTCAGCGACTGGGGAATGCCTTCCAGTCTATCAGCCAGGCGTTCATG  
CTGGACCCTCCCCACTGCTCAGAGACCTTCAACAACGCCATCTCCCATNNNNNNNNNNNNNNNNNNNNNNAC  
TGACCTCTCTGGGTTTCATCATTGGAGTCGGTGTGGTTGGAAACCTCCTG  
ATCTCCATCCTGCTGGTCAAAGACAAGAGCCTGCACAGAGCGCCCTACTA  
CTTCTGTTGGACCTGTGCGCCTCTGATATCCTCCGCTCCGCCATCTGCT  
TCCCCCTTCGTTTACCTCGGTCAAGAATGGATCTGCCTGGACCTATGGC  
ACGCTGACCTGTAAGGTGATCGCCTTCTGGGGTCTCTCCTGTTTCCA  
CACGGCGTTTATGCTGTTCTGTGTCAGTGTACGCGCTACCTGGCCATCG  
CACATCACCGTTTCTACACCAAGAGGCTGACCTTCTGGACCTGTCTCGCC  
GTCATCTGCATGGTGTGGACGTTGTCAGTGGCTATGGCATTTCGGCCGGT  
GCTAGACGTGGGGACGTACTCTTTCATCCGCGAGGAGGACCAGTGCACGT  
TCCAGCACCGTTTCTCAGGGCGAACGATTTCGCTGGGCTTCATGCTCCTG  
CTGGCGCTCATCCTCCTGGCCACACAGCTGGTTTACCTCAAGCTCATCTT  
CTTCGTCACGACCGTCGAAAGATGAAGCCTGTCCAGTTCGTGCCTGCCG  
TCAGCCAGAACTGGACCTTCCACGGGCCAGGCGCCAGCGGGCAGGCGGCG  
GCCAACTGGCTGGCGGGATTTCGGTCGAGGCCACCCCGCCTACTTTGCT  
GGGCATCCGGCAGAACAGCAACGCTGCGGGCCGAGGCGTCTGCTGGTAT  
TGGATGAATTCAAACAGAGAAGAGGATTAGTAGGATGTTCTACATCATG  
ACGTTTTTCTTCTGGCACTGTGGGGCCCTATCTGGTCGCCTGCTACTG  
GCGGGTGTTTGCAAGGGGCCCGTGGTCCCGGGGGCTACCTGACGGCAG  
CCGTGTGGATGAGCTTTGCCAGGCTGGGGTCAATCCNNNNNNNNNNNNNNNNNNNNNNNNNNNNNN  
NNCTCGCTTTCACCC  
TGGCATGGGGACTGGTCTTGGCACGGAGC---GCAGCGTCCCCTCGGCA  
ACAGCTTGCTATCCCCGACGAAACCGAGGAGCCACTGTTGCCACCCCC  
CCGACGCGATGGTTTGTACCC---CTGCCAACAACCGACTGGACTTTGC  
TGCTCGGCATACGACGCCGCT-----GATTTCGCCGGTAACGCGG  
CCACCTTGCTGTCTTACGACGCGCCGGAGTGAAGGCTC-----TTCCC  
CTGCCGACTGCAGGCTGTCCAACCGCCCTTTGGCTATTACGACAGCCC  
GTCAG---GCTGG---GGAGGACGCACGCCACCGCAGTACTGCGGCGTGA  
ACAGCAAATCCAGCTCGGTCTTTTCTGCTGGCCACTAACTCTATCGGT  
GGCAGAGCGGGCA---CC---AACTACCTGG-----CCGAGGA---  
GGGA---GACTC---CATCCCGACGGAGCGGTACCG---AT---CGGCG  
GCTCGGAGGAG---ACCAAACCCAAAGACATGAC---ATCAGA---GTCG  
AACTGGATAGAG---ACGCCGTCTCCATTAAGTCCATCGACTCGAGCGA  
TTCTGGCATCTTTG---AACAGGCCAAAAGGAGACGGATCTCACCTTCTG  
CCACGCCG-----GTTTCAGAGACAGTGTCCCCTTAAATCAGAG  
NNNNNNNNNNNNNNNNNNNNNNNNNNNNNNNNNNNNNNNNNNNNNNNNNNNNNNNNNNNNNNNN  
NNNNNNNNNNNNNNNNCCACAGCACCCACGATATTGGCTCCGG---ACAGACGGCGTTCCTCCC  
AGGCG---CCGGGCTAC---GCAGCAGCCGCCCTGGGA---CACCATCA-  
-----CCACCCGACCCACGTTGGCTCT---TACTCCACGGCGGCTTTCAA  
CTCCACCAGGGACTTCTCTTTCAGAAATCGGGGATTCGGGGACGCCACCG  
G-----CGCGCAGCACAGTGTGTTGCTC-----CGGA  
AGTTT---C-----GCAGGCCACATGGACTCAGATGCAGCGGGGCA  
CCTGCTTCTCCCGGGCTCCACGAG---CAAGCGGCGAGCCATGCGTCTT  
CCAACGTGGTCAACAGCCAGATGCGGCTGGGCTTCTCGGGGACATGTAC  
GGACGGGCCGACAGTACGGCCACGTTACAAGCCCGCGGT---CCGACCA  
CTACGCTTCGACCCAGCTGCACGGCTACGGCCCCATGAACATGAATATGG



CCGCA---CACCACGGAGCAGGGGCCCTTCTTTTCGATACATGAGGCAGCCG  
ATCAAGCAAGAGCTCATCTGCAAGTGGATCGAGCCGGAGCAGCTGACAAA  
CCCCAAAAGTCGTGCAACAAAACCTTTCAGCACGATGCACGAGCTGGTGA  
CCCATCTGACGGTGGAGCATGTGGGGGGACCGGAGCAGACCAACCACGTC  
TGCTTCTGGGAGGATTCGCCTCCGAGAAGGAAAGCCATTCAAAGCCAAATA  
CAAACCTGTGAATCATATCAAAGTACACACCGGAGAAAAGCCCTTCCCGT  
GTCCGTTTCCCGGNNNNNNNNNN

>Chiasmodon sp

AGCCTTCTTATCCGAGCTGAACTCAGCCAACCAGGCGCCCTACTTGGGGA  
TGACCAAATCTATAATGTTATCGTCACAGCCACGCCTTCGTAATAATTT  
TCTTTATAGTAATACCAATCATAATTGGAGGATTCGGGAACTGGTTAATC  
CCACTTATGATCGGGGCCCGGATATAGCCTTCCCTCGAATGAACAACAT  
AAGCTTCTGACTTTTACCCCTTCGTTCCCTTCTCCTTCTCGCTTCTCCG  
GAGTTGAAGCCGGTGCCGGAACCGGGTGAACAGTCTACCCCTTTAGCC  
GGTAATTTAGCCCATGCCGGAGCATCCGTTGATTTAACTATTTTTTCTCT  
TCATCTGGCAGGTATCTCATCAATCCTGGGGGCCATCAATTTTATCACGA  
CAATTATTAACATAAAAACCTGCAGCTATCTCGCAGTACCAAACCTCCCTTA  
TTTGTGGGGCCGCTTAATTACAGCTGTTCTTCTTCTACTCTCTCTCCC  
AGTTCCTGGCCGAGGCATTACAATACTTCTAACAGACCGAAACCTAAATA  
CAACCTTTTTTGATCCGGCAGGAGGGGGAGACCCAATTCTTTATCAACAC  
TTATTTTGATTCTTC-----  
-----  
-----  
-----

-----NNNNNNNNNAGAAACCTTACCCGACTAACTGCCTCGGCATGCTGTT

GCTGTCTGACGCCCACCAGTGCACCAAGCTGTCAGAGCTCTCTTGGGGAA  
TGTGCCTCAGCAACTTCCCGCTATTTGTAAGACAGAGGACTTCTCCAA  
CTGCCCAAAGATATGGTGGTGCAGCTTTTGTACACAGAGGAGCTGGAGAC  
AGAAGATGAGAGACTGTTTTATGAAGCTGCCCTGAATTGGATCAACTATG  
ACCTGAAAGGAGGCACGTGTACCTTCCAGAGCTCCTGAGAACGGTCCGC  
CTTGCCCTGCTGCCTGCCATCTTCTCATGGAAAACGTCTCGACAGAAGA  
GCTGATCAACGCCCAGGCCAAGAGCAAGGAGCTGGTGGACGAGGCTATCC  
GCTGTAAGCTGAAGATCTTGCAGAATGACGGCGTCTTAACAGCCCCTGT  
GCTCGACCACGGAAAACAGCCATGCTCTCTTCTGCTGGGAGGGCAGAC  
GTTTCATGTGTGACAAGTTGTACCTGGTGGACCAGAAGGCCAAAGAGATCA  
TCCCGAAGGCGGACATCCCCAGCCCAGGAAGGAGTTCAGCGCCTGTGCC  
ATCGGCTGTAAGGTGTACATCACCGGCGGGA--GAGGCTC-AGAGAAAYGG  
TGTGTCCAAAGATGTGTGGGTCTATGACACCATCCACGAGGAATGGTCCA  
AAGCGGCGCCCATGCTCATCGCCAGGTTTGGCCACGGCTCTGCTGGCCTG

ANNNNNNNNNNNNNNNNNNNNNNNNNNNNNNNNNNNNNNNNNNNNNNNNNGGAT

GAATACATCGCTGTCTTCAGTCGTTCAACAACAAGACTGATACTG  
AACGAACCCGAGCTAATCATGGCTCTGGCCCAGGAGTTCCAGATGAGAGT  
TGTACAGTTTCCCTAGAGGAACAGTCTTTCCCCAGCATTGTCCAGGTGA  
TCAGCGGTGCTTCAATGTTAGTCAGCATGCATGGAGCTCAGCTTATCACC  
TACTCTTCCCTCCCCAAGGAGCTACTGTAGTGGAGCTGTTCCCCCTTGC  
TGTGAACTCAGAGCAGTACACCCCATATAAAAACCTTGCCTCCCTTCCAG  
GAATGGACCTTCATTATATTTCCCTGGAGGAATACTCAGGAGGAAAACACT  
GTCACCCATCCAGACAGACCCTGGGAACAAGGAGGCATCATTCACTTGGA  
CAAGGAGGAGCAGGAGCGAATTCTGAGCAGCAAAGATGTCCCCAGGCACC  
TGTGCTGCCGCAACCCGGAGTGGCTCTTCCGAATCTATCAGGACACATTG  
GTAGACATTCCTTCTTCCCTGGARGTCCTCAA---CGAGGGAATGAAG--  
-ACCAAGCCCAGCTYGAAGAA---GTCCAAGTCAGCTAGTACAGTCCATC  
CAGGCCGGGTGAGAGAAGCCCAGTGTACAGACCTCAGTACAGACCACCAAT

GAGGCTAAACTCACAGTCTCCTGGCAGATCCCATGGAATCTGAAATACTT  
GAAAGTAAGAGAGGTGAAGTACGAGGTG-----AAAAGAGACACCA  
GCAAGGGAACTCTGGAGGATCAGATCATCCAGGCGAACCCGGCGCTGGAG  
GCCTTCGGGAACGCCAAAACGCTGAGGAATGACAACTCGTCCCGTTTTGG  
AAAGTTCATCCGAATTCACTTTTGGAACCAGCGGAAAACGTGTCGTCCGCTG  
ACATCGAGACGTACCTGCTGGAGAAGTCTCGCGTCACCTATCAGCTCAAG  
GCTGAGAGGGACTACCACATCTTCTACCAGATCCTGTCCAATCAGAAGCC  
AGAGCTGCTGGACCTGCTGCTAATCACCAACAACCCCTACGACTACTCCT  
ACATCTCCCAAGGAGAGGTAACGGTCGCCTCCATCAACGACTCAGAGGAG  
CTGATGGCCACCGACAGCGCCTTCGACGTGCTGGGCTTCACGCCGGAGGA  
GAAGATGGGCATCTATAAACTGACCGGCGCCATCATGCACCACGGCAACA  
TGAAGTTC AAGCAGAAGCAGCGTGAGGAGCAGGCGGAGCCTGACGGGACG  
GAGGCTGCTGATAAAATCAGCTTACCTGATGGGACTGAACTCTGCTGACCT  
CATCAAAGGATTGTGTCATCCCAGAGTCAAGGTAGGAAACGAGTACGTCA  
CCAAAGGCCAGAGCGTGGACCAGGTCCACTACCCCAACAAGGAGGCCTTC  
AAGTGTGAGGAGTGTGGGAAGCACTACAACACCAAGCTGGGATATAAGCG  
CCATGTGGCCATGCACTCCGCCACGGCGGGGGATCTCACCTGTAAAGTGT  
GCATGCAGAGTTATGAGAGCACCCCTGTTCTCTTAGAGCACCTCAAGAGC  
CACTCGGGGAAGTCCTCGGGCGGAGCCAAGGAGAAAAAGCATCCGTGTGA  
CCACTGCGACC GCCGTTTTCTATAACGCGAAAGATGTGAGACGGCACATGG  
TGGTTACACAGGCCGAAAGGACTTCTTGTGCCAGTACTGTGCCAGCGC  
TTTTGGAAGGAAGGACCACCTGACCCGCCACGTGAAGAAGAGCCACTCACA  
GGAGCTGCTGAAGATCAAGACGGAGCCTCCTGATATGTTAGGTCTTTTAG  
CCTCGGGGTACCACCGTGTCTGTGAAGGAGGAGCTTAGCCCCATGATG  
TGCGGCATGGGTCCCAATAAAGACCCCATGATGGGCAAACCGTTCCCTAG  
TGGCGCCCTTTTCCGATGGGCATGTACAACCCCCACCAC-----CTTC  
AGGCCATGTCTAATTCTGGGGTGGGTTCATGCA-----CACCCGTCCCTG  
ATGCCAGCTCCCTGTCTGCAGCTATGGGCATGGGCTGTACATGGAATA  
TCTCATCTACGCCTCATTCTCATTCATGGGATGTTTACAAATCAGTGACG  
GATCGAACATAGTGAACCTGCTGGCTAGTAACTCTCCGAGTGTTTCATAC  
GCTCTGACCCAGCAGAAATACTTCAGCAACTACAGTCCTGTGATTGGCTT  
TTACATTTACGAGCCCATCGAGTACTGGAAGTCCACAGTGCAGGAGCACC  
TGAAGACTCTGAGTCACGGCTTCAACAAGATCTCCTGGATGGACAACCTC  
TTCCACTACCTGCGGGTGGTGAATGTGAGCGCATCGACCAAGAACGACTT  
CATCACCATCCTCAAGGGCTCCTTCTGCGCAGCCAGAGTACCAGCATT  
TCACTGAGGACATCATATTTTCCAAAA--ACCGCGAGACTG-----AC  
GAATATAACATTATCGCCTCACGCTTGTATTTGGTGGCACGGACCACAGA  
GAAGAAGCGCGAGGAGGTGGTGGAGCTTCTGGAGAAGCTTCGCCCTTGA  
TGCTGATCAACAGCATCAAGTTCATTGCCTTCAATCCCACGTTTGTGTT  
ATGGACCGCTACAGCTCCTCCGTATCTCACCCATCCTGACCTCAGGCTT  
CAGCGTGCTACCATCCTCATCCTCACTTTCTTCTGGTTCATCAACCCTT  
TGGGGAACCTTCTGGCTCATCCTCACGGTTACGTCCGTGGAGCTGGGCGTNNNNNNNNNNNNNNNNNNNN  
NNNNNNNNNNNNNNNNNNNNNNNNNNNNNNNNNNNNNNNNNNNNNNNNNNNNNNNNNNNNNNNNNNNN  
NNNNNNNNNNNNNNNNNNNNNNNNNNNNNNNNNNNNNNNNNNNNNNNNNNNNNNNNNNNNNNNNNNNN  
NNNNNNNNNNNNNNNNNNNNNNNNNNNNNNNNNNNNNNNNNNNNNNNNNNNNNNNNNNNNNNNNNNNN  
NNNNNNNNNNNNNNNNNNNNNNNNNNNNNNNNNNNNNNNNNNNNNNNNNNNNNNNNNNNNNNNNNNNG  
AGAAACACGGTGGAGGACCACCTGTTCCTGAAAAGGCTGTACGTTTCTCT  
TTCACTACTATATGCTGTCTGTCTGCTGGCAGATGATGAGGAG-----  
-----GAGGCAGTTACAATTTTACGGAGCCGA  
AGCCCAACTCAGAACTGTCCTGTAAGCCTCTTTGCTTGATGTTAGTGGAT  
GAATCAGACCATGAGACCCTCACAGCTCTCCTGGGGCCCATAGTTGCAGA  
GCGTAATGCAATGAAAGAGAGCAGGCTTATCCTTTCAATCGGCGGCCTGC  
TTCGCTCCTTCGCTTCCACTTCAGAGGCACGGGATATGATGAGAAGATG

GTGCGTGAGATGGAGGGCCTGGAGGCCTCAGGGTCCAGCTATGTCTGCAC  
TCTGTGTGATTCCAGTCGGGCAGAGGCATCTCAAAACATGGTGCTACACT  
CCATCACACGCAGCCATGACGAGAACCTTGAATGTTATGAAATATGGAGA  
ACCAACCCTTTTTCTGAGTCAGGAGACGAGCTGCGGGACAGAGTCAAAGG  
GGTCTCTGCCAAGCCCTTCATGGAGACCCATCCCACACTGGATGCATTAC  
ACTGTGACATTGGCAATGCCACTGAGTTCTACAAAATTTTTCCAGGATGAA  
ATTGGGGAGGTGTTCACAAAGGT---CAAT---CCCAGCAGAGAGGAACG  
GCGGAGCTGGAGGGCAGCCCTAGATAAACAGCTGAGGAAGAAGTTGAAGC  
TTAAACCAGTAATGAGGATGAATGGGAACTATGCCCGCAGGCTAATGACT  
CAGGAGGCTGTGGAGGCGGTGTGTGAGCTGGTGCCCTCAGAGGAGAGGAG  
GGAGGTCCTGAGGGAGCTTATGAGACTATACATCCAGATGAAGCCTGTGT  
GGCGGCCACCTGCCATCCAAGGAGTGCCCTGACCAGCTGTGCCGCTAT  
AGCTTTAACTCCCAGAGCTTTGCTGACCTCCTCTTCTGCCTTCAAATA  
TAGGTACAATGGAAAAGATAAGCAATTACCTGCACAAGACTCTGGCCCATG  
TCCCTGAAATCATAGAGAGAGATGGATCCATCGGAGCCTGGGCCAGCGAA  
GGAAACGAGTCANNNNNNNNNNTCATAACAATTGAGATGGGCCCAGTGGGGCCCCAGTG  
GAAGGAGAGCCCACAGCCTTTTTTCTGCTCAGTTGAAGACCCAACAAAAC  
AGACAAAGTTCAAAGGCATCAAGACGTACATTTTCGTATCGGGTCATGCCG  
AGTCACACAGGGCACCCTGCTACAGGCGCTACAAAACACTTTGACTGGCT  
GTACAACCGCTACTGCACAAGTTCACTGTGATCTCTGTGCCTCACCTGC  
CCGAGAAGCAGGCCACGGGGCGATTTGAGGAAGACTTTATCGAGAAGCGG  
AAGAGACGACTGATATTTGTGGATGAATCACATGACCAGTCACCTGTCTCT  
CTCCCAGTACGAAGGCTTTGAGCACTTTCTGATGTGTGCCGATGACAAGC  
AGTGGAAGCTGGGCAAAGACGAGCWCAGGAAGGATGAGATGGTGGGCGCC  
CATTTTCATGCTGACTCTCCAGATCCCCTAATGAGCACCAGGACCTTCAGGA  
TGTAGAGGAGAGGGTAGACACCTTCAAGGCCCTTTGCTAAGAAAATGGACG  
ACAGCGTCATGCAGCTCACACATGTTGCCTCGGAGCTGGTGCCTAAGCAC  
CTGGGTGGATTTCAGGAAGGAGTTCAGCGGCTGGGAAATGCCTTCCAGTC  
CATTAGCCAGGCATTCATGCTGGACCCTCCCCATAGCTCAGACACCCTCA  
ACAACGCCNNNNNNNNNNNNNNNNNNNACAGTTCCTCAAACACTGACCTCTCTGGGTTTCATCATTGGCGT  
CGGTGTGGTTTGGAAACCTCCTGATCTCCATCCTGCTGGTCAAAGACAAGA  
GCCTTACCAGACACCCTACTATTTCCCTGCTGGACCTGTGCCTCCGAT  
ATCCTTCGCTCCGCCATCTGCTTCCCCTTTGCTTACCTCGGTCAGAA  
TGGATCCGCCCTGGACGTATGGCACGCTGACCTGCAAAGTGATCGCTTCC  
TGGGTGTGCTCTCCTGTTTCCACACGGCGTTCATGCTATTTCTGCGTGAGC  
GTCACCCGCTACCTGGCCATCGCCACCACCGTTCCTACACCAAGAGGCT  
GACCTTCTGGACCTGTCTGGCTGTCATCTGCATGGTGTGGACGTTGTCCG  
TGGCTATGGCGTTCCCGCCGGTGTAGACGTAGGGACATACTCTTTTATC  
CGGGAGGAGGACAGTGCACGTTCCAGCACCCTCCTTCCAGGGCGAATGA  
TTCGCTGGGCTTCATGCTCCTGCTGGCGCTCATTCTCCTGGCCACACAGC  
TGGTTTACCTCAAGCTCATCTTCTTCGTCCACGACCGTCGAAAGATGAAG  
CCTGTCCAGTTTGTGCCCTGCTGTCAGCCAGA ACTGGACCTTCCACGGGCC  
AGGCGCCAGCGGGCAGGCGGCCGCAACTGGCTGGCCGATTTGGTAGAG  
GCCCCACCCCGCTACTTTGCTGGGCATCCGGCAGAACAGCAACGCAGCA  
GGCCGAGGCGTCTACTGGTATTGGATGAATTCAAACAGAGAAGAGGAT  
TAGTAGGATGTTCTACATCATGACTTTTTTTCTTCCGGCACTGTGGGGG  
CCTATCTGGTAGCCTGCTACTGGCGGGTGTGTGCAAGGGGCCCTGTAGTC  
CCTGGAGGCTACCTGACGGCAGCCGTGTGGATGAGCTTTGCGCAGGCTGG  
GGTCAATCCATTTCATCTGNNNNNNNNNNNNNNNNNNGCCAAATCTCGCTTTCACCCTGGCGTGGGGAC  
TGGTCTGGCACGGAGC---GCAGCGTCCCACTCGGCAACAGCTTGCTAT  
CCCCGAGCAAACCGAGGAGCCCACTGTTGCCACCCCGCAGCGATGG  
TTTGTACCC---CTGCCAACACCGACTGGACTTTGCTGCCTCGGCATA  
CGACGCGGCT-----GATTTTCGCCGGTAACGCAGCCACCTTGCTGT

CCTATGCAGCGGCCGGAGTGAAGGCTC-----TCCCCTGCCGACCGCA  
GGCTGCTCCAACCGACCTCTTGGCTATTACGCAGACCCGTCCG---GCTG  
G---GGAGGACGCACGCCGCCGAGTACTGCGGGCTAAACAGCAAAACCA  
GCTCGGTCTTTTCTGCTGGCCCGCAACTCTATCGGCGGCAGAGCAGGC  
A---CC---AACTACCTGG-----CCGAGGA---GGGA---GACTC  
---CATCCCCGACGGAGAGGTCACCC---AT---C---GGCTCCGAGGAG-  
--ACCAAACCCAAAGACATAAC---ATCAGA---GTCGAGCTGGATAGAG  
---ACACCGCCCTCCATTAAGTCCATCGATTCAAGCGATTCTGGTATCTT  
TG---AACAGGCCAAGAGGAGAAGAATCTCACCCCTTGCCACGCCG----  
-----GTTTCAGAGACAGTGTCCCAGTTAAAATCCGAGNNNNNNNNNNCAGGCGAAGTCA  
CAGAGAGAGAAGTGGCGTTGGGGATAAATCCGTTTCGCAGATGGGATGGGC  
GCCTTCAAATAAAACCACAGCTCCACGATATTGGCTCCGG---ACAAAC  
GGCGTTTTCTCCAGGCA---CCCGGTAC---GCAGCAGCCGCCCTGG  
GA---CACCACCA-----CCACCCGACCCACGTTGGCTCT---TACTCC  
ACGGCGGCTTTCAACTCCACCAGGGACTTTCTCTTCAGAAATCGGGGCTT  
CGGGGACGCCACCGG-----GGCGCAGCACAGTTTGTTCGCCT  
C-----CGGAAGTTT---C-----GCAGGGCCACATGGACACTCA  
GATGCGGCAGGGCACCTGCTCTTCCCGGGGCTCCATGAG---CAAGCGGC  
GAGCCATGCGTCTCCAACGTGGTCAACAGCCAGATGCGGCTGGGCTTCT  
CGGGGGACATGTACGGACGGGCTGACCAGTACGGCCACGTTACGAGCCCG  
AGGT---CCGACCACTACGCTTCGACCCAGCTGCACGGCTATGGCCCAT  
GAACATGAATATGGCCGCA---CACCACGGAGCAGGGGCTTCTTTTCGAT  
ACATGAGGCAGCCGATCAAACAAGAGCTCATCTGCAAGTGGGTGCGAGCCG  
GAGCAGCTGACGAATCCCAAAAAGTCGTGCAACAAAACTTTTAGCACGAT  
GCATGAGCTAGTGACCCATCTGACGGTGGAGCATGTGGGGGACCGGAGC  
AGACCAACCACATCTGCTTCTGGGAAGAGTGCTCCAGAGAAGGGAAGCCA  
TTCAAAGCCAAATACAAACTTGTGAATCATATCAGAGTACACACCGGAGA  
AAAGCCCTTTCCNNNNNNNNNNNNNNNNNNNNNNNNNNNNNNNN

>Chirocentrus dorab

AGCCTGCTCATCCGAGCCGAATTGAGCCAACCGGGGGCCCTCCTTGGAGA  
CGACCAGATCTACAACGTCAATTGTTACCGCACATGCATTCGTAATAATCT  
TCTTTATGGTCATGCCATTCTCATCGGAGGGTTCGGCAACTGACTAGTC  
CCCCTCATGATCGGGGCGCCGATATAGCATTCCCCGTATAAACAACAT  
GAGCTTTTGGCTACTGCCCCCTCATTTCTTTTACTGCTTGCCCTCATCCG  
CAGTTGAGGCGGGAGCGGGCACTGGGTGAACGGTCTACCCCCCCTGGCC  
GGTAATCTTGCCACGCAGGTGCCTCAGTCGACCTGACCATTTTCTCACT  
CCACCTGGCAGGTGTCTCATCTATCTCGGGCTATTAATTTCAATTACCA  
CAATTATCAACATGAAACCTCCCGCCATTTACAATAACCAGACACCCCTA  
TTTGTCTGAGCGGTA TAGTCACTGCAGTACTCCTCCTCCTTTCTCTTCC  
CGTGCTAGCGGCAGGAATTACCATGCTGCTTACGGACCGAAACTTAAACA  
CGACGTTCTTCGACCCCGCTGGTGGGGGGGACCCATCCTCTACCAACANNNNNNNNNNNNNNNNNNNNNN  
NNNNNNNNNNNNNNNNNNNNNNNNNNNNNNNNNNNNNNNNNNNNNNNNNNNNNNNNNNNNNNNNNNNN  
NNNNNNNNNNNNNNNNNNNNNNNNNNNNNNNNNNNNNNNNNNNNNNNNNNNNNNNNNNNNNNNNNNNN  
NNNNNNNNNNNNNNNNNNNNNNNNNNNNNNNNNNNNNNNNNNNNNNNNNNNNNNNNNNNNNNNNNT  
TCCTGGAGAAGAACCTGCACCCGTCCAAGTGTCTGGGCATGCTCCTGCTG  
TCCGACGCCACCAGTGCACCCAGCTCTCCAGCTGTCTGGAGCATGTG  
CCTGAGCAACTTCCCCGCCATCAGCAAGAGCGAGGAGTTCCTGCAGCTGC  
CCAAGGACATGCTGGTCCAGCTGCTGTCCACGAGGAGCTGGAGACGGAG  
GACGAGCGGCTGGTCTACGAGTCCGCCCTCAACTGGGTCAACTACGACCT  
GGAGCGCCGCACTGCCACCTGCCGAGCTGCTGCGCACCGTGCGCCTGG  
CGCTGCTTCCCGCCATCTTCTGATGGAGAACGTCCTCACCAGGAGCTG  
ATCAACGCCCAGGCCAAGAGCAAGGAGCTGGTGGACGAGGCCATCCGGTG  
CAAGCTGCGCATCCTGCAGAACGACGGCCTGGTCAACAGCCCTGCGCC

GGCCCCGCAAGACCAGCCACGCCCTCTTCCTGCTGGGCGGCCCCACCTTC  
ATGTGCGACAAGCTCTACCTGGTGGACCAGAAGGCCAAGGAGATCATCCC  
CAAGGCCGACATCCCCAGCCCCCGCAAGGAGTTCAGCGCCTGCGCTATCG  
GCTGCAAGGTGTACGTGACGGGCGGGC--GGGGCTC-CGAGAACGGCGTG  
TCCAAGGACGTGTGGGTGTACGACACGCTGCACGAAGAGTGGTCCAAGGC  
GCCGCCATGCTGATCGCCCCGCTTCGGGCACGGCTCGGCCGAGCTGCGCC  
ACTGCCGTGTACGTGGTGGGCGGGCACACGGCCGCCACGGGCTGCCTGCCG  
GCCTCCCCGTCCTGATGACTACATTGTAGTGTTTACGAGATCTATTAATA  
GGCTGATACTCAACGAGGCTGAGCTGATTCTGGCACTAGCCCAAGAGTTC  
CAGATGAGGACCGTCACAGTGTCCCTTGAGGACCAGTCGTTCTCAAGTAT  
CATTCAAGTGATCAGTGGGGCATCCATGCTAGTGAGCATGCATGGAGCCC  
AGCTCATCACTTCCCTGTTTTCTGCCTCGAGGAGCAGTTATGGTGGAACCTT  
TTCCCTATGCTGTGAACCCCGACCATTATACTCCTTACAAGACTCTTG  
TTCCCTGCCAGGCATGGACCTTCAATATGCAGCTTGGAAGAACACGATAA  
TGGAGAACTCTGTAGCTTATCCAGAGCGACCCTGGGATCAAGGTGGC  
TCTCATTTGGATAAGGATGAACAAGACCGCATCCTTGCAAGTAAGGAAGT  
GCCCAGGCATCTATGTTGCAGTAACCCGGAATGGCTTTTTCCGCATTTATC  
AGGATACATTGGTGGACATAACATCGTTCATGGCTACCCTCAG---AAGA  
ACTGTACAA--ATCAAGCCGAATTTGAAAAA---GGCCAGACCTGCAAG  
CACAGTTCACCCAGGCCGAGTAAGGGAGCCTAAATGTCAGACTTCAGTCC  
AAGCTGCCAATGAGGCCAAGTTGACGGTGTCTTGCCAAATTCCTGGAAC  
CTCAAGTACCTAAAGGTTTCGTGAAGTCAAATATGAGGTGTGGATACAGAA  
AAAGGATGCTAGTAAGGGGACTCTGGAGGATCAAATCATCCAGGCCAACC  
CCGCTCTGGAGGCGTTTTGGGAATGCCAAAACACTGAGAAACGACAACCTC  
TCTCGCTTTGGGAAATTCATTTCGTATTCACCTTTGGAACAGTGGAAGCT  
TTCCCTCTGCTGACATTGAGACTTACCTCCTGGAAAAGTCCAGGGTGACCT  
TTCAGCTTAAGGCTGAGAGGAACCTACCACATCTTCTATCAGATCATGTCC  
AATGAAAAGCCTGAGTTGTTAGACATGTTGTTGATCACCATAACCTTA  
TGATTACTCTTATGTCTCTCAAGGAGAGATCGCTGTGGCCTCCATCAACG  
ACTCAGAGGAGCTGATTGCCACCGACAGTGCCTTTGATGTGCTTGGCTTC  
ACTGGTGAAGAGAAAATGGCAGTCTACAAGCTGACTGGTGCCATCATGCA  
CCATGGCAACATGAAATTC AAGCAGAAGCAGAGAGAAGAGCAGGCCGAGC  
CAGACGGCACAGAGTCTGCTGACAAGTCTGCTTACCTGATGGGATTAAC  
TCCGCAGACCTCCTCAAAGGACTCTGCCACCCAAGGGTCAAGGTAGGCAA  
TGAGTACGTACCAAAGGTGAGAATGTAGACCAAGTTTACTATCCCAACA  
AGGAGGCCTTCAAGTGCGAGGAGTGCGGCAAGCACTACAACACCAAGCTG  
GGCTACAAGCGGCACGTGGCCATGCACTCAGCCACGGCAGGCGACCTGAC  
TTGCAAGGTCTGCCTGCAGAGCTACGAGAGCACGCCGGTGTGCTGGAGC  
ACCTCAAGAGCCACTCGGGCAAGAGCTCGGGTGGCGCCAAGGAGAAGAAG  
CACCCGTGTGACCACTGCGAACGGCGCTTCTACACGCGCAAGGACGTGAG  
GCGCCACATGGTGGTGCACACGGGACGCAAGGACTTCCTGTGCCAGTACT  
GTGCCCAGCGCTTCGGCCGCAAGGATCACCTCACGCGTCACGTCAAGAAG  
AGCCACTCACAGGAGCTGTTGAAAATCAAGACAGAGCCGCCGGACATGCT  
GGGTCTGTTGGGCTCAGGATCGCCTCCCTGCTCTGTCAAGGAGGAACCTCA  
GCCCCATGATGTGCAGCATGGGCTCGGCCGAGACCCCATGATGGCCAAG  
CCCTTCCCCACTGGAGCGCCATTCCCCATGAGTATGTACAACCCGCACCA  
C-----CTCCAGGCCATGTCCAACCCGGGGGTGGGCCACCATCACCACC  
ACCCTCCCTGGTGGCCAGCTCGCTGTCAGCTGCTATGGGCATGGGCTGC  
CACATGGAG-----  
-----  
-----  
-----  
-----



-  
>Chitala chitala









-----  
-----  
----ACAAGCGAAGTCACAGACAGAGAAGTGGCTTTGGGGATAAAATCCGT  
TTGCCGACGGGATGGGTGCTTTTAAAATCAACCACAGTACCCACGATTTG  
GGGACTGG---TCAAACAGCGTTACCTCGCAGGCT---CCGGGCTAT--  
-GCGGCTGCAGCCCTGGGA---CATCATCA-----CCATCCTACCCATG  
TCAGCTCC---TATTCCACGGCGGCTTTCAACTCTACCCGGGACTTTCTG  
TTTCGAAACAGGGGTTTGGAGATGCGGCGAC-----TGCTCA  
GCACAGTCTTTTTGCCACCGC---AGCAGGAGGCTT---C-----GCAG  
GGCCACACGGACACTCAGATGCTGCGGGACATCTTCTTTTTCCCGGACTT  
CACGAA---CAAGCGGCCACCCACGCCACTTCCAATGTTGTAAACAGTCA  
GATGCGACTGGGATTTTCGGGGGAAAATGTATGGCAGAGCAGAGCAGTACG  
GCCACGTAACGAGCCCCAGGT---CCGATCACTATGCGTCTACCCAGTTA  
CACGGCTATGGCCCCATGAACATGAATATGGCAGCA---CACCATGGAGC  
CGGGGCCCTTCTTTTCGCTATATGAGGCAGCCGATAAAAACAAGAGCTTATTT  
GCAAATGGATTGAACCGGAACAGCTAACGAACCCGAAAAAGTCTTGCAAC  
AAAACTTTCAGCACAATGCACGAGCTTGTGACTCACCTTACAGTGGAAACA  
TGTTGGGGGACCAGAACAATCGAATCACATATGCTTTTGGGAAGAGTGTG  
CCCGGGAAGGAAAACCGTTTTAAAGCGAAGTACAAGCTTGTGAATCACATC  
AGAGTACACACTGGCGAGAAACCCCTCCCGTGCCCTTTCCCGGGGTGTGG  
GAAA

>Chlorophthalmus agassizi

AGCCTCCTTATTCGGGCAGAACTAAGCCAGCCCCGAGCCCTTCTAGGCGA  
CGATCAGATTTTACAATGTTATCGTTACAGCCACGCCTTTGTAATGATTT  
TCTTCATAGTAATGCCAATTATGATTGGAGGGTTTGGAAACTGGCTCATC  
CCGCTTATGATTGGAGCCCCGACATGGCATTCCCCCGGATAAAATAACAT  
GAGCTTCTGGCTTCTTCCCTCCATCTTTCCTCCTCCTCCTCGCTTCTCTG  
CAGTAGAGGCAGGAGCCGGCACAGGGTGAACAGTCTACCCTCCTCTTGCC  
AGTAATCTAGCGCACGCCGAGCCTCTGTTGACCTAACCATCTTTTCGCT  
TCACCTAGCAGGAATTTCCCTCCATCTTGGGTGCTATCAACTTTATTACAA  
CCATCATTAATATGAAGCCCCCAGCAATTAATCAATATCAAACCCCCCTG  
TTTGTATGAGCAGTCTGATTACCGCGTCTTCTTCTCCTATCCCTCCC  
TGTTTTAGCAGCAGGCATTACGATGCTTCTTACTGATCGTAATCTAAACA  
CAACGTTCTTCGACCCGGCGGGGGAGGAGACCCAATCCTCTATCAACAC  
CTATCTGATTCTTTGGCCACCCAGAGGTTTATATTTAATTCTTCCAGG  
CTTTGGTATAATCTCCCATATTGTTGCTTACTACTCGGGTAAAAAGAAC  
CTTTCGGCTACATGGGTATAGTTTGGAGCCATGATAGCAATTGGCCTTCTT  
GGGTTCAATTGTTTGGGCTCCCTCATGTTTACAGTCGGGATGGACGTAGA  
CACACGTGCCTATTCTGGAGAGGAACCTGCACCCATCCAACCTGCCCTGG  
CATGCTGCTACTGTCAGATGCCCACCAGTGCACCAAGCTGTCAGAGCTGT  
CCTGGGGTATGTGCCCTCAGCAACTTCCCTGCCATCTGCAAGACGGAGGAC  
TTCTCCAGCTGCCCAAAGACATGGTGGTGCAGCTCCTGTCCCATGAAGA  
GCTGGAGACAGAAGATGAGAGACTAGTTTATGAGGCTGCCCTTAACTGGG  
TCAACTATGACCTGGAGAGGAGACACTGCCACCTGCCAGAGCTGTTGAGA  
ACCGTGCGCCTGGCCTTGCTTCCCAGCATCTTCCCTCATGGAGAACGTCTC  
CACAGAGGAGCTGATCAATGCCAGGCAAAGAGCAAGGAGTTGGTGGATG  
AGGCCATCCGCTGCAAGCTGAAGATCCTGCAGAATGACGGTGTGGTCAAC  
AGTCCCCTGTGCCCGGCCAGAAAGACCAGCCACGCCCTTTTCCCTGCTGGG  
AGGGCAGACCTTCATGTGTGACAAGCTGTACTTGGTGGACCAGAAGGCCA  
AAGAGATCATCCCCAAGGCGGACATCCCCAGCCCCAGGAAGGAGTTCAGT  
GCCTGTGCCATTGGCTGTAAGGTCTACGTACAGGCGGGA--GAGGCTC-  
AGAGAACGGTGTATCTAAAGACGTGTGGGTCTATGACACCGTCCACGAGG  
AGTGGTCCAAGGCAGCACCCATGCTCATTGCCAGGTTTGGCCATGGCTCT

GCTGAGCTCAAACACTGCCTCTATGTGGTTGGAGGACACACAGCAGCCAC  
TGGCTGCCTCCCAGCCTCTCCGTCTGGATGAGTACATTGTGGTGTTCAGT  
CGTTCCACAACAAGGCTAATTCTGAACGAAGCAGAGCTGATACTGGCACT  
GGCCCAAGAGTTTCAGATGAGGGTTGTTACAGTGTCCCTGGAGGAACAGT  
CTTTCCCCAGCATCGTACAGGTCATCAACGGGGCTCCATGTTGGTCAGT  
ATGCACGGAGCTCAGCTCGTCACCTCACTCTTCCCTCCCTAGAGGAGCTGC  
TGTAGTGGAGCTCTTCCCCTATGCTGTGAACCCGGAGCAGTACACCCCAT  
ACAAAACCCTAGCCTCCCTACCAGGCATGGACCTTCAGTACGTTTCCTGG  
AGGAACACTATTGAGGAGAACACGGTCACCCACCCAGACAGACCCCTGGGA  
CCAAGGAGGCATTGCCATTTGGAGAAAAGAGGAGCAGGAGAGAATCCTAG  
CCAGCAAGGATGTCCCAGGCACCTYTGTGCCGAACCCAGAGTGGCTC  
TTCAGGATCTACCAGGACACTCTGGTAGACATCCCCCTCCTTCCCTGGAAGT  
CCTCAA---GGAGGGCCTGAAG---ACAAGGCCGAGCTTGAAGAA---GT  
CCAAGCCAGCCAGCACGGTTACCCGGGCGGGTCCGAGAACCCCA-TGC  
CAGACTTCAGTGCAAGCCGCCGACGAGGCAAAACTCACAGTATCCTGGCA  
GATCCCATGGAACCTTAAGTATCT-AAGGTGCGAGAGGTGAAGTACGA-G  
TGTGGATCCAGAAAAGGACACAAGCAAGGGAACCCCTGGAGGATCAAATC  
ATTTCAGGCGAACCCCTGCACTGGAGGCTTTTGGTAATGCCAAAACACTGAG  
GAACGATAATTCTCCCGTTTTGGAAAATTCATCCKCATCCACTTTGGAA  
ACAGTGGTAAACTGTCTCTGCGGACATTGAGACCTACCTGCTGGAGAAG  
TCACGGGTCACCTTTCAGCTTAWGGCAGAGAGGAACTACCACATCTTCTT  
CCAGATCTTGTCCAATCAAAGCCAGAGCTGTTGGACATGCTACTGATCA  
CCAACAACCCCTATGACTACTCGTACATCTCCAAGGAGAAGTAACCGTA  
GCATCCATCAATGATTTCAGAGGAGCTGATGGCCACTGACAGTGCCTTTGA  
TGTGCTTGGCTTACSCAMGAGGAGAAGATGGGAGTCTACAAGTTGATAG  
GGGCCATTATGCACTATGGCAACATGAGGTTCAAGCAAAGCAACGTGAG  
GAGCAGGCTGAGCCTGATGGTACAGAGGCTGCTGATAAGTCAGCTTATCT  
AATGGGGCTGAATTCGGCAGACCTAATCAAAGGACTCTGCCATCCCAGAG  
TCAAGGTAGGAAATGAGTATGTCACCAAAGGCCAGGTTGTAGATCAAGTC  
TACTACCCCAACAAGGAGGCCTTCAAGTGTGAAGAGTGTGGCAAGCACTA  
CAACACCAAGCTGGGCTACAAGCGCCATGTGGCCATGCACTCTGCCACGG  
CAGGGGACCTCACCTGCAAAGTGTGCATGCAGAGCTACGAGAGCACCCCG  
GTGCTCCTGGAACACCTCAAGAGCCACTCGGGGAAGTCCTCGGGCGGCGC  
CAAGGAGAAGAAGCACCCGTGCGACCACTGCGACCCGTGCTTCTACACGC  
GGAAGGACGTGAGGCGGCACATGGTTGTCCACACGGGCCGAAAGGACTTC  
CTGTGCCAGTACTGTGCCAGCGCTTCGGCAGGAAGGATCATCTGACACG  
GCACGTGAAAAAGAGCCACTCGCAGGAGCTGCTGAAGATTAAGACGGAGC  
CTCCGGATATGTTGGGTCTCCTGGGCTCTGGCTCGCCACCTTGCTCTGTC  
AAGGAGGAGCTGAGCCCCATGATGTGCAGCATGGGTCCCAATAAAGACCC  
CATGATGGGCAAACCCCTTCCCAGCGGGACCCCTTCCCATGGGCATGT  
ACAACCCCAACCAC-----CTCCAGGCCATGTCTAATCCTGGGGTGGGC  
CACCC-----CACCCCTCCCTTATGCCTGGTTCTCTATCTGCAGCTAT  
GGGCATGGGCTGTCAATGGAGTATCTCATCTACGCYTCCTTCTCCTTCA  
TGGGATGTTTACAAATCAGCGACGGGTCGAACGTCGTGAATTTGCTGGCC  
AGTAACTCTCCGAGCGTCTCGTACGCCCTGACGCAGCAGAAGTACTTCAG  
TAACTATAGCCCCGTGATCGGGTTTACATCTATGAGCCCATCGAGTACT  
GGAACTCCACGGTGCAGGAGCACCTGAAGACGTTGAGCCACGGCTTCAAC  
AAGATCTCCTGGGTGGACAACTTCGTCCACTACCTGCGGACGGCGAACGT  
GAGCGCGTCGACCAAGGCCGACTTCGTGCGCGTCCCAAGGGCTCCTTCC  
TGAGGAGCCCGGCTACCAGCACTTCACGGAGGACATCATCTTCTCCAAG  
A---GCCACGAGAGCG-----ACGGCTACGACATCATCGCCTCGCGCAT  
GTACCTGGTGGCGCGCACCACCGAGAAGAGGCGGAGGACGTGGTGGAGC  
TCCTGGAGAAGCTCCGGCCGCTGATGCTGATCAACAGCATCAAGTTCATC





GGAAACCTGGCCCACGCAGGAGCTTCCGTAGACCTAACAATCTTCTCCCT  
ACACCTTGCAGGTATCTCCTCAATCTTGGAGCCATTAACCTTATTACAA  
CTATTATCAACATGAAGCCCCCGCAATCTCACAATACCAGACCCCTCTA  
TTCGTGTGGGCTCTACTAATCACCGCGTCTTCTACTCCTCTCCCTCCC  
CGTTCTAGCAGCCGGCATCACAATGCTCCTAACAGATCGAAATCTTAACA  
CAACTTCTTTGACCAGCAGGAGGGGTGACCCCATTTCTATAACCAACAC  
CTC-----  
-----  
-----  
-----

-----TTCTGGAGAGGAACCTGCACCCGTCCAACCTGCCTAGG  
CATGCTGCTGCTCTCGGACGCCACCAGTGCGCCAAGCTGTGGAGCTCT  
CCTGGGGCATGTGCCCTCAGCAACTTCCCGCCATCTGTAAGACGGAGGAC  
TTCTTGCAGCTGCCAAGGACATGGTAGTGCAGCTGCTCTCCACGAGGA  
GCTGGAGACGGAGGACGAGCGGCTGGTGTACGAGGCGGCCCTCGGCTGGC  
TGAACTACGACCTGGACGGGAGGCACTGCCACCTGCCGGAGCTGCTCCAG  
ACAGTCCGCCTGGCTCTGCTGCCGGCCATCTTCTGATGGAGAACGTGTC  
GACGGAGGAGCTGATCAACTCCCAGGCCAGGAGCAAGGAGCTGGTGGACG  
AGGCCATCCGCTGCAAGCTGAAGATCCTGCAGAACGATGGCGTGGTCAAC  
AGCCCGTGCACACGGCCCCGCAAGACCAGCCACGCCCTCTTCTGCTGGG  
CGGCCAGACGTTTCATGTGCGACAAGCTGTACCTGGTGGACCAGAAGGCCA  
AGGAGATCATCCCCAAGGCTGACATCCCGAGCCCCGCAAGGAGTTCAGC  
GCGTGTGCCATTGGCTGCCGGGTGTACATCACCGGCGGGC--GGGCTC-  
CGAGAACGGCGTCTCCAAGACGTGTGGGTGTACGACACCGTGCACGAAG  
AGTGGTCCAAGGCAGCACCCATGCTCATCGCCCGCTTCGGCCACGGCTCG  
GCCGAGCTGAAACACTGCCTCTATGTGGTGGGAGTTCATACTGCGGCTAC  
AGGCTGCCTACCGCCCTCCCCGTCGGGATGAGTACGTCGTGGTGTTCAGT  
CGTTTCGACAACAAGGCTGATTCTGAATGAAGCGGAGCTAATTATGGCTCT  
TGCACAAGAGTTCAGATGAGGGTGGTCAACCGTCTCCCTGGAGGAACAGC  
CGTTTGCCAGTATCGTGCAGGTGATCAGCGGAGCCAGCGTGTGGTAAGC  
ATGCATGGAGCTCAGCTCGTACATCACTGTTCTGCCAGAGGAGCAGC  
CGTGGTGGAGCTGTTCCCGTACGCTGTGAACCCACAGCAGTACACCCAT  
ATAAGACGCTGGCATCCCTGCCAGGCATGGACCTTCACTACGTTTCATGG  
AGGAACACTATGGAGGAGAACACAGTCAACCCAGACAGACCTTGGGA  
CCAAGGAGGCATCACGCACTTGGAAAAGGAGGAGCAAGAGCGAATACTGG  
CCAGCAAGGACGTGCCAGGCATTTGTGTTGCCGCAACCCAGAATGGCTT  
TTCCGGATCTACCAGGACACTTTGGTAGACATTCTTCAATGCTGGAGGT  
CCTGAA---AGAGGGCTGAAG---ACGAGGCCTAGCTTAAAGAA---AA  
CCAGGCCGGCCAGCACAGTCCATCCTGGACGGGTGAGGGAAGCCCAATGT  
CAGACCTCCGTCCAAGCTGCCAATGAGGCTAAGCTCACAGTCTCCTGGCA  
GATCCCATGGAATCTCAAATACCTGAAGGTGAGAGAAGTTNNNNNNNNNNNNNNNNNNNNNAAGAAGGAT  
G

CCAGCAAGGGAACACTTGAGGATCAGATCATCCAGGCCAACCCGGCCCTG  
GAGGCCTTTGGCAATGCCAAGACCGCCCGCAATGACAACTCCTCCCGTTT  
TGGAAAATTCATTCGGATCCACTTCGGAACAAGCGGGAAGCTGTCATCCG  
CTGACATCCAAACATACTTCTGGAAAAGTCCCAGGTCACCTTTCAGCTC  
AAAGCTGAGAGGAATTACCACATCTTCTTCCAGATCCTATCTAATCAGAA  
ACCAGAGCTCTTGGATATGCTGCTGATCACAACAATCCCTACGACTATT  
GCTACATCTCCAGGGAGAAGTGACCGTCTCCTCTATCAACGACTCCGAG  
GAGCTAATGGCCACGGACAGTGCCTTTGACNTGCTTGGATTCACTCCTGAG  
GAGAAGATGGGCGTGTACAAGCTAATAGGAGCCATCATGCATTACGGCAA  
CATGAAGTTTAAACAGAAACAGCGTGAGGAGCAGGCAGAGCCAGACGGAA  
CCGAANCAGCTGATAAGTCAGCATACTGATGGGTCTAAACTCTGCTGACC

TCATCAAAGGACTGTGCCATCCCAGGGTCAAGGTAGGAAATGAGTATGTC  
ACCCAAGGACAAAGTGTAACCCACGTCTACTACNCCAACAAGGAGGCTTTC  
AAGTGCAGCAGAGTGTGGCAAGCACTACAACACCAAGCTGGGCTACAAGCG  
CCATGTGGCCATGCACTCGGCCACGGCAGGGGACCTCACGTGCAAGGTGT  
GCATGCAGAGCTACGAGAGCACCCCGTCTCTGGAGCACCTCAAGAGC  
CACTCGGGAAAGTCGTCGGGCGGGCCAAAGGAGAAAAAGCACCCGTGCGA  
CCACTGCGACCGCCGCTTCTACACCCGCAAGGACGTGCGGCGGCACATGG  
TGGTCCACACGGGCGCAAGGACTTCTGTGCCAGTACTGCGCCAGCGC  
TTCGGCAGGAAGGACCACCTGACGCGGCACGTGAAGAAGAGCCACTCGCA  
GGAGCTGCTGAAGATCAAGACGGAGCCGCCTGACATGCTGGGCTCTTG-  
-----GGCCCTCCCCCTGCTCCGTCAAAGAGGAGCTGAGCCCCATGATG  
TGCAGCATGGCCCCAGTAAGGACCCCTGATGGGCAAGCCCTTTCAG  
CGGGACCCCTTCCCCATGGGCATGTACAACCCAC-----CTCC  
AGGCCATGTCCAACCTCAGGGGCGGCCACCC-----CACCCCTCCCTG  
ATGCCNNNNNNNNNNNNNNNNNNNNNNNNNNNNNNNNNNNNNTATCTCATATATGCGTCCCTCT  
CGTTCATGGGATGTTTACAAAT  
CAGCGATGGATCGAACATTGTGAATTTGCTGGCCAGTAACTCTCCAAGCG  
TGTCCTACGCCCTGACCCAGCAGAAGTACTTACGCAACTACAGTCCGGTG  
ATCGGGTTTACATTTACGAACCCATTGAGTACTGGAACCTTACGGTGCA  
GGAGCACCTGAAGACGCTGAGTCATGGCTTCAACAAGATCTCCTGGATGG  
ACAACCTTCTTCCACTACCTGCGGGTGGTGAACGTGAGTGCCTCAACAAAG  
AACGACTTTCATCMACATACTCAAGGGCTCCTTCTTGCAGTCCGGAGTA  
CCAGCACTTTCACAGAGGACATCATCTTCTCCAAGA---ACCGTGACAGTG  
-----ACGAGTACGACATCATCGCCTCGCGGATGTATCTGGTGGCGCGC  
ACCACAGAGAAGAAGCGCGAGGAGTTGTGGAGCTCCTGGAAAAGCTGCG  
TCCGCTAATGCTGATCAACAGCATTAATTCATCGCCTTCAACCCACTT  
TTGTGTTTTCATGGACCGTTACAGCTCTTCGGTAATCTCGCCATACTGACT  
TCAGGCTTTAGCGTGTAAACCATCCTCATCCTCACCTTCTTCTGTCAT  
CAACCCCTTGGGGAACCTTCTGGCTCATATTGACAGTCACTTCTGTGGAGT  
TAGGGTCTTGGGTTGATGGGCTACCACCCATTTGAGTGGCAGCCTGCG  
CTTAAGAACGTGTCCGCTCCTGCCACGTGGGCATTATCAACGGGCTCTC  
TGGTTGGGCCGCTTCCGTGGATGACGTCCCACATCGAGACCATCACTCGGC  
GGTTCCGCTACGACGTAGCCCTGGTGTGCGCCATGAAGGACCTGGAGGAG  
GACATCATGGAGGGCCTGACAGAACATGGCCTGGACGACAGCTCATGCAA  
CACGGGCTTTGACGTGATGATAAAGGAGTCTTGCAGCGGCATGGGAGATG  
TCAGCGAGAAGCACGGCGGGGGCCCGCTATCCAGAGAAGGCTGTGCGC  
TTCTCGTTACCATCATGTCCGTATCCGTGCTGCCTGAAGGGAAGGAC--  
-----GAGACGGTGACCGTTTTTCAGGG  
AGCCAAAGCCAAACTCTGAGTTGTCTTGTAAAGCCCTGTGCCTGATGTTT  
GTGGATGAGTCGGACCAGAGATGCTCACCGCCGCTCTGGACCCCTGCT  
GGCCGAGAGGGCCGCATGAAACACAGCCGGCTCATCTTATCCATAGGTG  
GCCTGCCCCGGTCTTCCGCTTCCATTTCCGAGGCACCGGCTACGATGAG  
AAGATGGTGCAGGAGATGGAGGGCCTGGAGGCTCTGGCTCCACGTATAT  
CTGCACCCTGTGTGACTCCACCAGAGCGGAGGCGTCCCACAACATGGTGC  
TCCACTCTGTAAGCCGCAACCACGATGAGAACCTGGAGCGCTATGAAATC  
TGGAGGACCAATCCCTTCTCGGAGTCCGCCGAAGAGCTGCGGGACCGGGT  
GAAAGGGGTTTCCGCCAAGCCGTTCTTGGAGACCCATCCCCTCTGGATG  
CGCTGCACTGCGACATCGGCAACGCCACTGAGTTTTACAAGATCTTCCAG  
GATGAGATTGGGGAGGTGTTCCGGAAGCC---CAAC---CCCACACGGGA  
GGAACGACGAAGCTGGAGGGCAACGCTGGACAAGCAGCTGCGGAAGAAGA  
TGAAGCTCAAACCGGTGATGAGGATGAACGGGAACACGCCCCGAAGCTG  
ATGACCGAGGACGCTGTTGATGTAGTCTGTGAGCTGGTGCCTCCGACGA  
ACGCCGGCAGGCTCTGCGAGAGCTCATGGGCTCTACCTACAGATGAAAC



CTGTCTGGCGTGCCACCTGCCCTGCTAAAGAGTGCCCAGACCAGCTGTGC  
CGCTACAGTTTCAACTCGCAACGCTTTTCCGAACTCCTCTCCTCCACCTT  
CAAGTACAGGTACAATGGAAAGATTACCAATTACCTGCACAAAACGCTAG  
CTCATGTTCTGAAATCATAGAGAGAGACGGCTCTATTGGAGCCTGGGCT  
AGCGAGGGGAATGAGTCGGCCAACAAATCATAACCATTGAAATGGGTCT  
CAAAGGGCCACAGTGAAGGAAAGTCCTCAGCCTTCTCGTGCTCCATTG  
AAGACCCCACTAAACAAACTAAGTTCAAGGGCATCAAAACGTACATTTTCG  
TACAGGGTCACGCCGAGCCACACGGGGCGACCCGTTTACAGACGCTACAA  
GCATTTTGATTGGCTGTACAACCGCTGCTGCACAAGTTCACTGTGATAT  
CGGTACCCCACTTGCCCGAGAAGCAGGCCACAGGGCGCTTCGAGGAGGAC  
TTTATTGAAAAGCGCAAACGGCGACTTGTCTGTGGATGAACCACATGAC  
AAGTCACCCGATCCTCTCCCAGTACGAGGGCTTTGAGCACTTTCTCATGT  
GTGCAGATGACAAGCAGTGAAGCTGGGCAAGAGGGCGCGCAGAGAAGGAT  
GAGATGGTGGGCGCTCATTTTATGCTGACCTTCCAGATTCTAGCGAGCA  
TCAGGACCTACAGGATGTCGAGGAGCGCATCGACTCCTTCAAGTCTTTCG  
CTAAGAAGATGGACGACAGCGTCATGCAGCTCACGCACGTTCGCATCGGAG  
CTGGTGCGTAAGCACCTCGGAGGGTTTCCAGGAGTTCCAGCGGTTGGG  
AAATTTCGTTCCAATCGATCAGCCAGGCATTACGCTGGACCCTCCTCAG  
GCTCTGATGCCCTAACAGCGCCATCTCCAC-----

-----GCCAAATCCCGATTTTACCCTGGCGTAGGGA  
CTGGTCCCTGGCACTGAGC--GTAGCGTCCCCTCAGCAACAGCTTGCTG  
TCTCCGCAACAAACCGAGGAGCCACTGTTG--CCTCCCCACAGCGATG  
GTTTGTACCC--CTGCCAACAAACCGACTGGACTTCGCTGCTTCGGCAT  
ACGATGCCGCT-----GATTTCGCCGGCAACGCCGCCACGTTGCTA  
TCCTACGCAGCGGCTGGAGTGAAGGCGC-----TTCCCTTGCCGGCTGC  
AGGTGCTCTAACAGGCCTCTTGGGTATTACGCAGACCCATCTG--GCT  
GG--GGCGCTCGTACTCCGCCGACTGTACC-----AGTAAACCA  
AGCACGGTGTCTCTCTGCTGGCCA--AATTCTGTTAGCGGCAGAGCGGG  
CT-----CAAATACTGG-----CTGAGGA--CGGA--GATG  
C--CATTTCCACCGAGAGGTCCCCG--AT--TGGTGGGACCGAGGAG  
--ACAAAACCCAAAGACT-----GTCAGA--ATCCAGCTGGATAGA  
G--ACCCCGTCTTCGATCAAATCAATCGATTCTAGCGATTCTGGGATCT  
TTG--ACAAGCCAAACGGAGAAGAATTTCTCCTTCAGCCACACCG--  
-----GTTGCAGAACTGTGTCCCCGTTAAAATCAGAGCATCACTCAAC

AGGCGAAGTCACAGAACGAGAAGTAGCTTTGGGGATAAATCCGTTCGCGG  
ACGGGATGGGAGCCTTCAAGATCAACCACAGTTCCCATGATATCGGCTCC  
GG---ACAGACAGCGTTTTCCACACAGGCG---CCCGGGTAC---GCAGC  
GGCGGCGCTGGGA---CATCATCA-----TCACCCCTCACACGTCAGCT  
CT---TACTCCACGGCGGCGTTCAACTCTACCCGGGACTTTCTCTCAGA  
AATCGGGGCTTTGGAGACGCCGCGAG-----TGCTCAGCACAG  
TTTATTTGCATCCGC---CGCGGAAGTTT---C-----GCAGGGCCAC  
ATGGACACTCAGATGCCGAGGGCACCTTCTCTTCCCGGGGCTCCACGAG  
---CAAGCCACTACGCATTCATCTTCTAACG---TCAACAGCCAAATGAG  
GCTTGGCTTTTTCCGGGGACATGTACGGCCGGGCTGACCAGTACGGGCACG  
TAACCAGCCCGAGGT---CCGACCACTATGCTTCTACTCAATTGCACGGT  
TATGGGCCTATGAATATGAACATGGCCGCG---CACCATGGAGCGGGGGC  
CTTCTTTCGGTACATGAGGCAGCCGATCAAACAGGAGCTCATCTGCAAGT  
GGATCGAACCGGAGCAATTGACGAACCCAAAAAAGTCGTGTAACAAAAC  
TTTAGCACAATGCATGAGCTGGTGACCCACCTGACTGTAGAGCATGTGGG  
GGGCCCAGAACAGTCGAACCACGTATGTTTCTGGGAAGATTGCTCTCGAG  
AAGGAAAACCGTTCAAAGCTAAATACAAACTTGTCAATCACATTCGAGTG  
CACACCGGAGAGAAACCATTTCCATGCCCATTTCCCGGCTGTGGCAA

>Chromis cyanea

AGCCTCCTCATTCGGGCAGAACTAAGCCAACCAGGCGCTCTCCTTGGAGA  
CGACCAGATTTATAATGTAATTGTTACAGCACACGCCTTTGTAATAATTT  
TCTTTATAGTAATGCCAATTATAATCGGGGGTTTCGAAACTGACTTATC  
CCTCTTATGATTGGAGCCCAGATATAGCATTCCCCCGAATAAATAACAT  
AAGCTTTTACTTCTACCACCTCATTCCTTCTCCTACTCGCCTCCTCTG  
GTGTTGAAGCAGGTGCCGGAACCGGGTGGACCGTCTATCCCCCTTATCA  
GGAAACCTAGCTCACGCAGGAGCCTCCGTAGACTTAACTATTTTCTCTCT  
CCACTTAGCAGGGATTTCCCTCAATTCGGGGGCAATCAATTTCAATTACCA  
CCATTATTAACATGAAACCCCGAGCCATCTCTCAATATCAAACCCCTCTC  
TTTGTATGNGCTGTTCTGATTACCGCGTTCTTCTCCTCCTATCCCTTCCA  
GTCCCTAGCTGCTGGCATCACCATGCTCTTAACCGACCGAAACTTAAACAC  
CACATTTTTTCGACCCTGCAGGAGGGGAGATCCTATCCTCTACCAGCACT  
TATTC-----  
-----  
-----

-----TTCTAGAGAGAAACCTCCACCCGTCCAACCTGTCTTGGC  
ATGCTGTTGCTGTCTGAYGCCACCAAGCTGTCAGAGCTCTC  
CTGGGGCATGTGTCTCAGCAACTTCCCGCAATTTGCAAGACAGAGGACT  
TCCTCCAACCTGCCAAAGACATGGTGGTGCAGCTTTTGTACATGAAGAG  
CTAGAGACTGAAGATGAGAGACTGGTTTATGAAGCTGCCCTCAACTGGAT  
CAACTACGACCTGGAAAGGAGGCACTGCCATCTTCCAGAGCTCCTGAGAA  
CAGTCCGCCTTGCCCTGCTGCCKGCCATCTTTTTAATGGAGAAAGTCTCA  
ACAGAGGAGCTGATCAACGCCAGGCTAAGAGCAAGGAGCTGGTGGATGA  
AGCCATCCGCTGTAAGCTGAAGATCCTGCARAATGATGGTGTCTGTCACA  
GCCCATGTGCTCGACCAAGAAAAACCAGCCATGCCCTCTTTCTTCTGGGT  
GGGCAGACTTTTCATGTGCGACAAGTTGTACCTGGTTGACCAGAAGGCCAA  
AGAGATCATCCCGAAGGCTGACATCCCCAGTCCCAGGAAGGAGTTCAGCG  
CCTGTGCCATTGGCTGTAAGGTGTACATCACCGGTGGGA--GGGGCTC-A  
GAGAAATGGTGTGTCCAAAGATGTGTGGGTCTACGACACTGTCCATGAAGA  
ATGGTCAAAGGCGGCACCCATGCTCATYGCCAGGTTTCGGCCATGGCTCAG  
CAGAGCTGAAACACTGCCTCTACGTCGTAGGAGGCCACACTGCAGCAACC  
GGCTGCCTCCCAGCTTCTCCGTCAGGATGAATACATTTGTTGTGTTTAGTC  
GTTCAACAACAAGGCTGATATTGAATGAAGCAGAGCTTATCATGGCACTG

GCCCAGGAGTTCCAAATGAGAGTGGTCACAGTGTCTTAGAGGAACAATC  
TTTCCCAGTATCGTCCAGGTGATTAGCGGTGCTTCCATGTTAGTCAGCA  
TGCACGGAGCTCAGCTTATCACCTCACTCTTTCTTCCCAGAGGAGCTGCT  
GTGGTGGAGTTGTTCCCTTTTGTCTGTGAACCCAGAGCAGTACACCCATA  
TAAAACCCTTGCTCTCTTCCGGGCATGGACCTTCACTATGTCTCCTGGA  
GGAACACGAAGGAGGAGAACAATATGACCCACCCAGACAGACCTGGGAG  
CAAGGAGGCATTGCTCACTTGGAAAAAGACGAGCAGGAACGAATCCTGGC  
CAGTACGGACGTCCCAGGCACCTGTGCTGCCGCAATCCAGAGTGGCTCT  
TCCGGATCTATCAGGACACTCTGGTGGACATCCCATCCTTACTGGAGGTC  
CTCAA---AGAAGCCATGAAG---ACCAAGCCCCAAGTTGAAGAA---GGC  
CAAGGCAGCAAGCACAGTCCACCCAGGCCAGGTGAGAGAGCCCCAGTGTC  
AAACTTCAGTACAAACCTCTAATGAGGCAAAACCTTACAGTCTCTTGCCAG  
ATCCCGTGAATCTGAAATACCTTAAGGTGAGAGAGGTAAAGTACGAGGT  
GTGGATCCAG-----

-----CCCAACAAGGAGGCCCTTCAAGTGGCAGGAGTGTGGGAAGCACTAC  
AACACCAAGCTGGGATACAAGCGCCATGTGGCCATGCACTCGGCCACCGC  
GGGCGATCTGACCTGCAAAGTGTGCATGCAGAGCTACGAGAGCACGCCGG  
TTCTCCTGGAGCACCTCAAGAGCCACTCAGGGAAGTCTCGGGCGGCGCC  
AAGGAGAAGAAACACCCGTGCGACCCTGCGACCGTTCGTTTCTACACCCG  
GAAGGATGTGAGGCGGCACATGGTGGTGCACACGGGCCGAAAGGACTTCC  
TGTGCCAGTACTGTGCCAGCGCTTCGGCAGGAAAGACCATCTGACGCGT  
CACGTGAAGAAGAGCCACTCGCAGGAGCTGCTGAAGATCAAGACGGAGCC  
TCCGGATATGTTGGGTCTGTTGGCCTCGGGTCTCCACCCTGCTCCGTTGA  
AGGAGGAGCTCAGCCCCATGATGTGTGGTATGGGGCCCAACAAAGACCCC  
ATGATGGGCAAACCTTCCCCAGCGGGGCCCCATCCCGATGGGCATGTA  
CAACCCCCACCAT-----CTCCAGGCCATGTCTAATCTGGGGTGGGTC  
ACTCA-----CACCCGTCCCTGATGCCCGGTTCCCTGTCTGCAGCTATG  
GGCATGGGCTGTCACATGGAGTATCTCATCTATGCCCTTTTCTCATTCAT  
GGGATGTTTACAAATCAGTGACGGATCGAATATCGTGAACCTGCTGGCTA  
GTAACTCTCCGAGTGTTTCATATGCTTTGACCCAGCAGAAATACTTCAGT  
AACTACAGTCCCCTGATTGGGTTTTATATTTACGAGCCCATCGAGTACTG  
GAACTCCACGGTGCAGGAGCATCTGAAGACTCTGAGTCACGGCTTCAACA  
AGATCTCCTGGATGGACAACCTTTTCCACTACCTGCGGGTAGTGAATGTG  
AGCGGTCAACTAAAAGCGACTTTATCAGCATCCTTAAGGGTTCCTTCTCCT  
GCGCAGTCCGGAGTACCAGCACTTACCCGAGGACATCATATTCCTCAAGA  
---ACGCGGAGACTG-----ATGAGTACGACATTATCGCCTCAGGATG  
TACTTGGTAGCACGGACCACAGAGAAGAAGCGCGAGGAGGTGGTGGAGCT  
TTTAGAAAAGCTTCGTCCCTTGATGCTGATAAACAGCATCAAATTCATTG  
CCTTTAATCCCACGTTTGTGTTTATGGACCGCTACAGCTCCTCCGTCATC  
TCACCTATCCTGACCTCAGGCTTCAAGTGTACTCACCATCCTCATCCTCAC  
TTTCTTCTGTCATCAACCCCTTGGGGAAGTCTGGCTCATCCTCACGG

TTACGTCCGTGGAGCTGGGCGTCTTGGGTTTGGATGGGCTTTCACCAGTTT  
GAATGGCAGCCAGCTCTCAAGAATGTGTCTACATCTTGCAACGTTGGCAT  
TATTAACGGGCTCTCTGGATGGGTTTCCTCGGTGGATGACTCCCCGGCTG  
ACACAATCACTCGGCGCTTTCGTTATGATGTGGCCCTGGTGTCTGCATTA  
AAGGATCTGGAGGAGGACATCATGGACGGGCTGAGAGAGAGTGGGATGGA  
AGACAGCGCTTGCACCTCAGGCTTTAGTGTTCATGATCAAGGAATGTTGCG  
ACGGTATGGGTGATGTCAGCGAGAAGCACGGCGGAGGACCTGCTGTTCCCT  
GAGAAGGCTGTACGCTTCTCTTTCACCATTATGTCTGTCTCTGTCCCTCGC  
AGATGATAAGAAG-----GAGGAGG  
TTACCATTTTCACTGAGCCAAAACCAAACCTCAGAGCTGTCCTGTAAGCCC  
CTCTCCCTGATGTTTCGTGGATGAGTCAGACCATGAGACACTCACAGCTGT  
CCTGGGGCCCATAGTTGCAGAGCGGAATGCAATGAAAGAGAGCCGACTCA  
TCCTATCCATCGGCGGCCTGCCTCGATCCTTTTCGCTTCCACTTCAGGGGC  
ACGGGGTATGATGAGAAGATGGTGCCTGAGATGGAGGGCCTGGAGGCCTC  
GGGGTCCACGTATGTCTGCACTCTATGTGACTCCACTCGTGCAGAAGCCT  
CGAAAAACATGGTCCCTTCACTCAGTCACCTCGCAGTCACGAGGAGAATCTA  
GAACGATATGAGATATGGAGAAGCAACCCCTTCTCTGAGTCTGCAGACGA  
GCTGCGGGACAGAGTCAAAGGGGTCTCCTCCAAGCCCTTCTGGAGACCC  
AGCCACGCTAGATGCCCTTACACTGCGACATTGGCAACGCCAGTGAATTC  
TACAAAATCTTCCAGGATGAGATCGGGGAAGTATACAAAAGGT---CAA  
C---CCCACCCGGGAGCAACGGCGCAGCTGGAGGGCAGCGCTGGATAAAC  
AGCTGCGGAAGAAGATGAAGCTTAAACCGGTAATGAGGATGAATGGGAAC  
TACGCCCGCAGGCTAATGACCCAGGAGGCTGTGGAGGTGGTGTGTGAGCT  
GGTGCCCTCTGAGGAGAGGAAGGAGGCCCTGAGGGAGCTCATAAGGCTCT  
ACCTTCAAGATGAAGCCTGTGTGGCGTGCCACCAATCCGGCCAAGGAATGC  
CCTGACCAGCTGTGCCGCTACAGCTTTAACTCCCAGCGCTTTGCCGACCT  
CCTCTCAACCTCCTTCAAATATAGGTACAACGGGAAGATAACCAATTACC  
TGCACAAGACCCTGGCCCATGTGCCTGAAATCATAGAGAGAGACGGATCC  
ATAGGAGCCTGGGCGAGCGAGGGGAACGAGTCAGCAAACAATCGTACAC  
CATTGAGATGGGTCCCCAGGGGCCCTGGTGGAAAGGAGAACCCACAGCCTT  
TCTCCTGCTCCATTGAAGAYCCCACCAAACAGACAAAAGTTCAAAGGCATC  
AAGACATACATTTTACATACCGGGTCACGCCGAGCCACACGGGGCGTCKGT  
CTACAGGCGCTACAAAACACTTTGACTGGCTGTACAACCGTTTACTGCACA  
AGTTCACTGTGATCTCTGTTCCCCACCTGCCTGAGAAGCAGGCCACGGGG  
CGCTTTGAGGAAGACTTCATCGAGAAGCGCAAGAGGCGACTGATACTGTG  
GATGAACCACATGACCAGTCACCCAGTCCTCTCCAGTACGAAGGCTTTG  
AGCACTTTCTGATGTGCGCTGACGACAAGCAGTGGAAACTGGGCAAGAGA  
CGGGCAGAGAAGGACGAGATGGTGGGCGCACATTTTCATGCTGACACTCCA  
AATCCCAACGAGCAYCAGGACCTTCAGGATGTTGAGGAGCGGGTCGACA  
ACTTCAAGGCCTTTGCCAAGAAAATGGACGACAGCGTGATGCAGCTGACA  
CACGTGGCCTCGGAGCTGGTGGGTAAACACCTGGGTGGATTTCAGGAAGGA  
GTTCCAGCGGCTGGGAAACGCCTTCCAGTCTATCAGCCAGGCTTTCATGC  
TGGACCCTCCCCATAGGTGAGACACCCTCAACAACGCCATCTCCATNNNNNNNNNNNNNNNNNNNNNNNNNN  
NNNNNNNNNTGG  
GTTTTATCATCGGAGTCGGCGTGGTTGGAAACCTCCTGATCTCCATCCTG  
CTGGTCAAAGACAAGAGCCTGCACCGAGCGCCCTACTATTTCCCTGCTGGA  
CCTGTGCGCCTCYGACATCCTGCGCTCTGCCATCTGCTTCCCCTTCGTCT  
TCACCTCGGTCAAAGAATGGATCTGCCGACGTACGGCACRGTGACCTGC  
AAAGTGATCGCCTTCCCTGGGTGTGCTCTCCTGTTTCCACACGGCGTTCAT  
GCTMTTCTGCGTCAGCGTCACACGCTACCTGGCCATTGCACATCACCGTT  
TCTACACCAAGAGGCTGACTTTCTGGACGTGCTTGGCTGTCATCTGCATG  
GTGTGGACGTTGTCTGTRGRATGGCATTYCCGCCGGTGCTAGACGTAGG  
GACGTACTCTTTCATCCGAGAGGAGGACCAGTGCACCTTCCAGCACCGCT

CCTTCAGGGCGAACGATTCATTGGGATTCATGCTCCTGCTGGCGCTCATC  
CTCCTGGCCACACAGCTGGTTTACCTCAAGCTCATCTTCTTCGTCCACGA  
CCGTCGAAAGATGAAGCCCGTCCAGTTCGTGCCTGCTGTGAGTCAGAACT  
GGACCTTCCACGGCCAGGCGCCAGCGGGCAGGCGGCGGCAACTGGCTG  
GCTGGATTTGGTCGAGGCCCCACTCCGCCTACTCTGCTGGGCATCCGGCA  
GAACAGCAACGCAGCGGGCCGAGGCGYCTACTGGTTTTGGATGAGTTCA  
AAACGGAGAAGAGGATTAGTAGGATGTTCTACATCATGACGTTTTTCTTC  
CTGGCGCTGTGGGGGCCCTATCTGGTCGCCTGCTACTGGCGGGTGTTCG  
AAGGGGCCCTGTGGTCCCTGGAGGCTACCTGACAGCAGCCGTGTGGATGA  
GCTTCNNNNNNNNNNNNNNNNNNNNNNNNNNNNNNNNNNNNNNNNNNNNNNNGCCAAATCTCGCTTTCA  
CCCTGGCGTGGGGACTGGTCCTGGCAG  
GAGC---GCAGCGTCCCCTCGGCAACAGCTTGCTATCCCCGCAGCAAAG  
CGAGGAGCCACTGTTGCCACCCCCCGCAGCGATGGTTTGTACCC---  
CTGCCAACAACCGACTGGACTTTGCTGCCTCGGCATACGACGCCGCT---  
-----GATTTCCGCGTAACGCGGCCACCTTGCTGTCTACGCAGCGGC  
CGGAGTTAAGGCTC-----TTCCCCTGCCGACTGCAGGCTGCTCCAACC  
GGCTCTTGGCTATTACGCAGACCCGTCTG---GCTGG---GGAGGACGC  
ACGCCGCCGAGTACTGTGGCGTAAATAGTAAATCCAGCTCGGTCTTTTC  
CTGCTGGCCCGCAACTCCATCGGTGGCAGGGCCGGCG---CC---AACT  
ACCTGT-----CCGAGGA---GGGA---GACTC---CATCACGACG  
GAGAGTACCCG---AT---CGGCGCTCGGAGGAG---ACCAAACCCAA  
AGACATGAC---GTCCGA---GTCGAGCTGGATAGAG---ACGCCGTCCCT  
CCATAAAGTCCATCGATTCCAGCGACTCTGGGATCTTTG---AACAGGCC  
AAACGGAGGAGAATCTCACCTTCTGCCACGCCG-----GTTTCAGA  
GACAGTGTCCCCGTTAAAATCCGAGCATCACTCAACAGGCGAAGTCACAG  
AGCGAGAAGTGGCGTTGGGGATAAATCCGTTCCGAGATGGGATGGGCGCC  
TTCAAATCAACCACAGCTCCACGATATTGGCTCCGG---ACAGACGGC  
GTTTTCTCCAGGCG---CCCGGTTAC---GCAGCAGCCGCCTTGGGA-  
--CACCATCA-----CCACCCGACCACGTTGGCTCT---TACTCCAG  
GCGGCGTTCAACTCCACCAGGGACTTCTGTTTCAGAAATCGGGGTTTCGG  
GGATGCCACCGG-----CGCGCAGCACAGTTTGTTCGCCTC--  
-----GGGAAGTTT---C-----GCAGGGCCACACGGACACTCAGAT  
GCGGCGGGGCACCTGCTCTTCCCGGGGCTCCACGAG---CAGGCGGCGAG  
CCACGCGTCTTCCAACGTGGTCAACAGCCAGATGCGGCTGGGCTTCTCGG  
GGGACATGTACGGACGCGCCGAGCAGTACGGCCACGTTACGAGCCCCAGG  
T---CCGACCACTACGCCTCGACCCAGCTGCACGGCTACGGCCCCATGAA  
CATGAATATGGCCGCG---CACCACGGCGCAGGGGCCCTTCTTTCGGTACA  
TGAGGCAGCCGATCAAGCAAGAGCTCATCTGCAAGTGGATCGAGCCGGAG  
CAGCTGACGAATCCCAAAAAGTCGTGCAACAAAACTTTCAGCACGATGCA  
CGAGCTGGTGACCCATCTGACGGTGGAGCATGTGGGGGGACCGGAGCAGA  
CCAACCACATTTGCTTCTGGGAGGACTGTGCCCCGAGAAGGGAAGCCGTT  
AAAGCCAAATACAAAACCTTGTGAATCATATCAGAGTACACACCCGGAGAAAA  
GCCCTTCCGTTGTCGTTCCCGGGCTGTGGCAAA

>Coccorella atlantica

AGCCTTCTCATCCGAGCAGAGCTGAACCAACCCGGTGCCCTCTTAGGGGA  
CGACCAGATCTACAATGTAATCGTCACCGCTCACGCCTTCGTAATAATCT  
TCTTTATAGTAATGCCAATTCTAATCGGCGGATTCGGAAACTGACTAGTC  
CCCCTGATACTCGGCGACCCGACATGGCATTCCCACGCATGAACAACAT  
AAGCTTCTGGCTTCTTCCCCCTCCTTCCTGCTCCTCCTAGCCTCTTCCG  
CCGTTGAAGCGGGGGCCGGCACAGGCTGAAGTGTATCCGCCCCCTTGCC  
AGCAACCTGGCTCACGCCGGAGCTTCTGTTGACCTGACAATCTTCTCACT  
CCATCTGGCCGGTATTTCCCTCCATTTCTAGGCGCCATTAATTTCAATTCAA  
CCATCATTAACATGAAACCCCGAGCTATTACCCAATACCAAACCCCCCTA

TTTGTGTGAGCAGTACTTATTACTGCCGTCCTTCTCCTCCTCTCTCTCCC  
TGTTCTAGCAGCAGGGATTACAATACTCCTCACAGACCGAAACTTAAACA  
CAACCTTCTTTGACCCCGCAGGCGGGGTGACCCAATTCTTTACCAACAT  
CTATTTTGATTCTTTGGCCACCCAGAAGTCTATATCCTCATCCTCCCCGG  
TTTTGGTATTATTTCTCACGTTGTGCTACTATGCAGGAAAAAAGAGC  
CCTTTGGCTACATGGGAATGGTCTGAGCTATAATAGCAATCGGCCTCCTG  
GGGTTTATTGTCTGAGCCCCCACATATTTACCGTCGGCATAGACGTTGA  
TACACGCGCCTATTCTCGAGAGGAACCTGCACCCGTCCAACCTGCCTTGG  
CATGCTGCTGCTGTCAGACGCCACCAGTGCACCAAGCTGTGGAGCTGT  
CCTGGGGTATGTGCCCTCAGCAACTTCCCTGCCATCTGCAAGACGGAGGAC  
TTCTCCAGTTGCCCAAAGACATGGTGGTGCAGCTCCTGTCCCACGAAGA  
GCTGGAGACGGAAGACGAGAGACTGGTTTATGAGGCCGCCCTTAACTGGG  
TCAACTATGACCTGGAGAGGAGACACTGCCACCTGCCGGAGCTGCTGAGA  
ACCGTACGCCTGGCCTTGCTTCCCTGCCATCTTTCTCATGGAGAACGTCTC  
CACAGAGGAGCTGATAAATGCCAGGCAAAGAGCAAGGAGTTGGTGGATG  
AGGCCATCCGTTGCAAGCTGAAGATCCTGCAGAACGACGGTGTGGTCAAC  
AGTCCCTGTGCCCGGCCAGAAAGACCAGCCACGCCCTTTTCTGCTGGG  
AGGGCAGACCTTCATGTGTGACAAGCTGTACTTGGTGGACCAGAAGGCCA  
AAGAGATCATCCCCAAGGCGGACATCCCCAGCCCCAGGAAGGAGTTCAGC  
GCCTGTGCCATCGGCTGCAAGGTGTACGTACGGGCGGGA--GAGGCTC-  
AGAGAACGGCGTCTCTAAGGACGTGTGGGTCTACGACACCGTCCACGAGG  
AGTGGTCCAAGGCGGCGCGATGCTCATCGCCCGGTTCCGGCCACGGCTCT  
GCCGAGCTCAAACACTGCCTCTATGTGGTTCGGAGGACACACTGCGGCCAC  
CGGCTGCCTCCCCGCTTCCGTCGGACGAGTACATCGTAGTGTTCAGC  
CGTTCCACAACCGGCTGATTCTGAACGAAGCGGAGCTGATACTGGCACT  
GGCCCAGGAGTTCAGATGAGGGTGGTTCACGGTGTCCCTGGAGGAGCAGT  
CCTTCCCCAGCATCGTGCAGGTTCATCAGCGGGGCTCCATGTTGGTTCAGC  
ATGCACGGAGCTCAACTCGTACCTCGCTCTTCCCTCCCCAGAGGAGGCGT  
CGTGGTGGAGCTCTTCCCCTACGCCGTGAACCCGGAGCAGTACACCCAT  
ACAAGACCCTAGCCTCCCTGCCGGCATGGACCTCCAATACGTTTCCCTGG  
AGGAACACTATTGAGGAGAACACTGTCGCCACCCAGACAGAGCCTGGGA  
CCAAGGAGGCATTGCCATTTGGAGAAAGAAGAGCAGGAGAGAATCCTAG  
CCAGCAAGGATGTCCCAGGCACCTATGCTGCCGCAACCCAGAGTGGCTC  
TTCAGGATCTACCAGGACACTCTGGTGGACATCCCCTCCTTGCTGGAAGT  
CCTCAA---GGAGGGCTGAAG---ACGAGGCCGAGCTTGAAGAA---GT  
CCAAGCCGGCCAGCACGGTTCACCCGGGCGGGTCCGAGAACCCAGTGC  
CAGACTTCGGTCCAAGCCACCAACGAGGCTAAACTCACAGTGTCTGGCA  
GATCCCGTGAACCTTAAGTACCTGAAGGTGCGAGAGGTGAAGTACGAAG  
-----AAAAAGGATACAAGCAAGGGAACCCCTGGAGGATCAAATC  
ATTCAGGCAAACCCCTGCGCTGGAGGCTTTTGGTAACGCCAAAACACTGAG  
GAACGATAAATCCTCCCCTTTGGAAAATTCATCCGAATCCACTTCGGAA  
CCAGCGGTAAATTGTCTCAGCGGACATTGAGACCTACCTGCTGGAGAAG  
TCACGGGTACCTTTCAGCTCAAGGCGGAGAGGAACCTACCACGTCTTCTT  
CCAGATCTTGTCCAATCAAAGCCAGAGCTGCTGGACATGCTGTTGATCA  
CCAACAACCCTTACGACTACTGCTACATCTCCCAAGGAGAAGTAACCGTA  
GCGTCCATCAACGACTCAGAAGAGCTGATGGCCACCGACAGTGCCTTCGA  
TGTGCTCGGCTTACGCAAGAGGAGAAGATGGGAGTCTACAAGTTGGTAG  
GGGCCATTATGCACTATGGCAACATGAGGTTCAAGCAGAAGCAGCGCGAG  
GAACAGGCAGAGCCTGATGGCACAGAAGCTGCCGATAAGTCGGCTTATCT  
AATGGGGCTGAATTCAGCAGACCTAATCAAATGTCTCTGCCATCCCAGAG  
TCAAGGTAGGAAATGAGTATGTCACCAAAGGCCAGGGTGTAGATCAAGTC  
TACTAC-----GGAGGCGTTCAAGTTCGAGGAGTTCGGCAAGCATTA  
CAACACCAAGCTGGGCTACAAGCGCCATGTGGCCATGCACTCCGCCACCG

CGGGGACCTCACCTGCAAGGTGTGCATGCAGAGCTACGAGAGCACCCC  
GTGCTGCTGGAGCACCTCAAGAGCCACTCGGGGAAGTCGTCGGGCGGCGC  
CAAGGAGAAGAAGCACCCGTGCGACCACTGCGACCGCCGTTCTACACGC  
GGAAGGACGTCCGGCGGCACATGGTGGTCCACACGGGCGCAAGGACTTC  
CTGTGCCAGTACTGCGCCAGCGCTTCGGCAGGAAGGACCACCTGACGCG  
CCACGTGAAGAAGAGCCACTCGCAGGAGCTGCTGAAGATCAAGACGGAGC  
CTCCGGACATGCTGGGCCTCCTGGGCTCCGGCTCCCCGCCCTGCTCCGTC  
AAGGAGGAGCTGAGCCCCATGATGTGCAGCATGGGTCCCAACAAAGACCC  
CATGATGGGCAAGCCCTTCCCCAGCGGGACGCCCTTCCCCATGGGCATGT  
ACAACCCCCACCAC-----CTCCAGGCCATGTCTAACCCCGGGGTGGGC  
CACCCC-----CACCCCTCCCTCATGCCCGGTTCCCTGTCCGCASCCAT  
GGGCATGGGCTGTACATGGAGTATCTCATCTACGCTTCTTTCTCCTTCA  
TGGGATGTTTACAGATCAGCGACGGCTCGAACGTGGTGAACCTGCTGGCC  
AGTAACTCTCCGAGCGTCTCGTACGCCCTGACGCAGCAGAAGTACTTCAG  
CAACTACAGCCCCGTGATTGGGTTCTACATCTACGAGCCCATCGAGTACT  
GGAACTCCACGGTGCAGGAGCACCTGAAGACGCTCAGCAATGGCTTCAAC  
AAGATCTCCTGGGTGGACAACTTCGTCCACTACCTACGGGCGGCAAACGT  
GAGCGCGTCCACCAAGGCCGACTTCGTTCGCCGTCTCAAGGGCTCCTTCC  
TGCGGAGCCCTGTGTACCAGCACTTCACCGACGACATCATCTTCTCCAAG  
A---GCCACGAGAACA---GCGACGACTACGACATCATTGCCTCGCGCAT  
GTACCTGGTGGCGCGCACCACGGAGAAGCGGCGGAGGACGTGGTGGAGC  
TGCTGGAGAAGCTCCGGCCGCTGATGCTGATCAACAGCATCAAGTTCATT  
GCCTTCAACCCACGTTTCGTCTTCATGGACCCTACAGCTCCTCGGTCAT  
CTCGCCCATCCTCACCTCGGGCTTCAGCGTGCTCACCATCCTCATCCTCA  
CCTTCTTCCCTGGTCATCAACCCGCTGGGGAACCTCTGGCTCATCCTGACG  
GTCACGTCCGTGGAGCTGGGCGTGCTGGGCCTGATGGGCTACCACGCGTT  
CGAGTGGCGGCCGGCCCTCCAGAACGTGTCCCCGTCCTGCCACGTGGGTA  
TCATCAACGGGCTTTCGGGTGGGCCGCGTCCGTGGACGAGGTCCCCGCC  
GACACCATCGCCCGTTCGGTTCGGCTACGACGTGGCCCTCGTGTCCGCCCT  
GAAAGACCTGGAGGAGGACATCGTGGACGGGCTGAGGGAGCACGGGCTGG  
CTGAC-----TGCGCCTCACGCTTCAGCGTCATGGTCAAGGAGTCTGC  
GACGGCTTGGGAGACGTCAACGAGAAGAACGGCGGCGGGCCGGCGATGCC  
CGAGAAGGCCGTGCGCTTCTCCTTACCCTCATGTCCGTCTCCGTCCACG  
CCGACGGAGAGGAGGAGGAGGAGGAG-----GAGGCG  
GTCGTGCTCTTCAGGGAGCCGAAGCCAACTCCGAACGTCTCCTGTAAGCC  
CCTGTGCCCTGATGTTCTGTGGACGAGTCTGACCACGAGACGCTCACCGCCG  
TCCTGGGACCTCTGGTGGCGGAGAGGAACGCGATGAAGCAGAGCCGGCTC  
GTCCTCCCGGTGGGGGGCGTCCCCCGCTCCTTCCGCTTCCGCTTCCGGG  
CTCGGGCTACGACGAGAAGATGGTGC GCGAGATGGAAGGCCTGGAGGCCT  
CGGGCTCCACCTACGCTTGCACCCCTTCGCGACGCCACCCGGGCGGAGGCC  
TCTCGCAACATGGTGCTCCACTCCGTACGCGTGGCCACGACGAGAACCT  
GGAGCGCTACGAGACGTGGAGGACCAACCCCTTCTCCGAGTCCGCCGCGG  
AGCTGCGGGACCGGGTCAAGGGGGTCTCCGCCAAGCCGTTTCATCGACACC  
CATCCGACGATGGACGCGTTGCACTGCGACATAGGCAACGCCACGGAGTT  
CTACAAGATGTTCCAGGACGAGATCGGGGAGGTGTTCCGGAAGGCCGCCA  
AC---CCCAGCCGGGAGGAGCGGCGGGCTGGCGGGCGGCCCTCGACAAG  
CAGCTGAGGAAGAGGCTGAAGCTGAAGCCGGTGAATGCGGATGAACGGGAA  
CTACGCCCCGAGGCTGATGACCGAGGAGGCGGCGGAGGCGGTGTGTGAAC  
TGGTGGCCTCGGAGGAGAGGCGGGCGGCGCTGAGGGAGCTGATGGCGCTC  
TACGTCCAGATGAAGCCGGTGTGGCGCGCCACCCGCCCGGCGGAGGAGTG  
CCCCGACCAGCTGTGCCGCTACAGCTTCAACTCCCAGCGCTTCGCCGAGC  
TCCTCTCCTCCACCTTCAATACAGGTACGACGGAAAGATCACCAACTAC  
CTGCACAAGACCCTGGCCACGTCCCCGAGATCATAGAGAGGGACGGCTC











-----

>Collichthys lucidus

AGTCTCCTTATTCGAGCAGAACTGAGCCAACCCGGCTCACTTCTCGGAGA  
CGACCAGATTTTTAATGTAATTGTTACGGCACATGCCTTCGTTATAATTT  
TCTTTATAGTAATACCCGTTATGATTGGAGGTTTCGGGAACTGGCTCGTG  
CCCTTAATAATCGGCGCCCCGACATAGCATTCCCCGGATAAAATAACAT  
GAGCTTCTGACTCATCCCTCCTTCTTTCCTCCTGCTCCTAACCTCATCAG  
GGGTCGAAGCGGGAGCCGGAACAGGGTGAACAGT---CCCCCACTTGCT  
GGAAACCTTGACACACGCAGGGGCTTCAGTTGACTTAGCCATCTTTTCTCT  
ACACCTCGCAGGTGTATCCTCAATCCTGGGGGCTATCAACTTCATTACAA  
CAATTATTAACATAAAAACCCCGCCATCTCCCAATACCAGACACCCCTG  
TTTGTCTGAGCCGTCTCATTACAGCAGTACTCCTGCTACTTTCCTACC  
TGCTTAGCTGCCGGCATCAAAATGCTCTAACAGACCGCAATCTTAACA  
CAACCTTTTTTGCACCCTGCAGGAGGAGGCGACCCCATCCT---CCAACAC











CCAGGGTGGCATTGCTCACTTGGAGAAGGAGGAGCAGGAACGCATCCTTA  
AGAGCAAGGAGGTGCCACGTACCTGTGCTGTGCGGAACCCGGAGTGGCTC  
TTCCGTATCTACCAGGACACCCAGGTGGACATTGCATCCCTACTCGACGC  
CCTGCG---CCAGGGACTGACC---TCCAAGCCAGGGCCCAAGAA---GG  
CTAGGCCCCAGCAGCACAGTCCATCCAGGCAGGGTGAGGGAGCCCAAGTGC  
CAGACCTCCGTCCAGGCCACCAACGAGGCCAAGCTGACCGTGTCTGGCA  
GATCCCCTGGAACCTCAAGTACCTGAAGGTGAGGGAGGTGAAGTATGAGG  
TATGGATTGAGAAGAAGGATACCAGCAAGGGGACACTGGAGGATCAAATC  
ATCCAGGCAAACCCAGCGCTGGAGGCTTTCGGCAATGCCAAGACGGCAAG  
GAATGACAACCTCCTCACGTTTTGGTAAATTTATTCGCATTCATTTTCGGAG  
TAAGTGGCAAGCTGTCTCTGTGACATAGAAACCTACCTACTTGAGAAA  
TCTCGTGTGACCTTTCAGCTCAAGGCTGAGAGGGACTATCACATATTCTA  
CCAGATCATGTCCAACAAAAGCCAGAATTGCTGGACATGCTGCTGATCA  
CCAACAACCCATAACGATTATGCTTACGTCTCCCAAGGAGAGGTGACGGTC  
ACATCCATTGATGACTCAGATGAACTGATTGCCACAGACAGTGCCTTTGA  
TGTGCTAGGCTTACGGCAGAGGAGAAGACAGGTGCTTATAAGCTAACAG  
GCGCCATCATGCATTATGGAAATATGAAATTC AAGCAGAAGCAGCGCGAG  
GAGCAGGCAGAGCCTGATGGCAGTGAGTCTGCTGACAAGTCAGCCTTCCT  
AATGGGGCTGAACTCTGCTGACCTTCTCAAGGGACTCTGCCATCCAAGGG  
TTAAAGTTGGAAATGAGTTTTGTACCAAAGGCCAAAATGTGGATCAAGTT  
TACTATCCCAACAAAAGAGGCCTTCAAGTGCAGAGGAGTGC GGCAAGA ACTA  
CAACACCAAGCTGGGCTACAAGCGGCACATGGCCATGCACGCGGCCACCA  
GCGGCGACCTCACCTGCAAGGTGTGCCTGCAGAGCTATGAGAGCACGCC  
GTGCTGCTGGAGCACCTGAAGAGCCACTCGGGGAAGTCCTCCGGCGGGGC  
CAAGGAGAAGAAGCACCCCTGTGACCACTGCGACCGCCGCTTCTACACAC  
GCAAGGATGTACGGCGCCACATGGTGGTGCACACCGGCCGCAAGGACTTC  
CTGTGCCAGTACTGCGCCAGCGCTTTCGGCCGCAAGGACCACCTGACCCG  
GCACGTGAAGAAGAGCCACTCGCAGGAGCTGCTGAAGATCAAGACCGAGC  
CGCCGACATGCTGGGTCTGCTGGGGTCCGGCTCCCCGCCCTGCCCCATA  
AAGGAAGAGCTCAGCCCCATGATGTG---TATGGGCCCCTCCAAGGACTC  
CCTGATGGGCAAGCCCTTCCCCGGTG-----CCTTCCCCATGGGCATGT  
ACAACCCTCAC-----CTGCAGGCTATGTCCA ACTCAGGGGTGTCC  
-----CATCACTCCCTGGTGTCCGGGTGCTGTCTGCAGCCAT  
GGGAATGGGCTGCCACATGGAGTACCTGATCTACGTTCCCTTCTTTCA  
TGGGATGTTTACAGATCAGCGACGGGTCGAACGTCGTCAACCTGCTGGCC  
AGCAACTCCCCGAGCGTCTCCTACGCTCTGACCCAGCAGAAGTACTTCAG  
CAACTACAGCCCGGTGATCGGGTCTACATCTACGAGCCCATCGAGTACT  
GGAACTCCACCGTCCAGGAGCACCTGAAGACGCTGGGCCACGGGTCAAT  
AAGATTTTCGTGGATTGACAACCTTCTTTCAGTATCTGAAGGTGGTGAACGT  
TAGCGCGTGCACAAAAGCGAATTCATAACCATCCTCCAGTCCCTCCTTCC  
TGAGGAGCCCAGAGTACCAGCACTCAAGGACGACATAATATTTTACAAA  
A---TAAGGG-----ACGAGACAGAGATCATCGCCTCCCGGAT  
GTACCTGGTGGCCCGACCACGGAGAAGACCCGGGAGGAGGTGGTGGAGC  
TCCTGGAGAGGCTSAGGCCCTCTCCCTCATCAACAGCATCAAATTCATC  
GTCTTCAACCCACCTTCGTGTTTCATGGATCGATACAGCTCCTCGGTCAT  
TTCGCCATCCTCACCTCAGGCTTCAGCGTCTGATCATCCTGATCCTGA  
CCTTCTTTCTGGTCATCAACCCCTGGGGA ACTTCTGGCTGATTCTGACG  
GTCACCTCGGTGGAGCTGGGGGTCTGGGCCTAATG-----

-----  
-----  
-----  
-----  
-----







AAGCCGTTCCCCACTGGCACCCCTTCCCCATGGGCATGTACAACCCCA  
CCAC-----CTCCAGGCCATGTCCAACCCTGGGGTGGGTAC-----  
--CACCATTCTCTGATGCCCGGCTCCCTGTCTGCTGCCATGGGGATGGGC  
TGCCACATGGAGTACCTGATCTACGCCTCCTTCTCCTTCATGGGATGTTT  
ACAAATCAGTGATGGATCCAACATCGTCAACCTCCTAGCCAGCAACACGC  
CCAGTGTGTCTAYGACYACGACCCAGCAGAAGTACTTCAGTAACTACAGC  
CCCGTGATCGGCTTCTACATATAACGAGCCCATCGAGTACTGGAACCTCAC  
GGTGCAGGAGCACCTCACAACGCTKAGCCACGGCTTCAACAAGATCTCCT  
GGATGGATAACTATTTTTCAGTATCTGAAGGTGGTGAATGTGAGCGCCTCG  
ACAAAAGTGATTTYATCACCATCCTRCAGGGCTCCTTCTGCGCAGCCC  
AGAGTATCAGCACTTCATGGARGACATCATTCTGTCCAAGACAGATGGRG  
-----ATGAAATGGAGATCATCGCRTCCAGGATGTACCTGGTG  
GCGCGGACCACAGAGAAGACAAGGGAGGAGGTGGTGGARCTGYTGGAGAG  
GCTCCGCCMCTCTCGTCTATCAACAACATCAAGTTCATTGTCTTCAACC  
CCACCTTCGTCTWCATGGACCGTTACAGCTCCTCCGTGGTGTACCCATC  
CTCACMTCGGCYTTTCAGYGTGCTCACCATCCTCATCCTCACCTTCTTCT  
GGTCATCAACCCTCTGGGGAACCTTCTGGTTGATCCTGACYGTACCTCCG  
TAGAGCTGGGGTCTGGGCCTCATGGGCTACCACCCCTTCGAGTGGCAG  
CCGGCCCTCAAGAGTGTGTCCACATCCTGCCATGTGGGGATCATTGACGG  
GCTATCAGGGTGGGTCGCTTCGGTGGATGACTCCCCAGCAGACACAGTCA  
CGCGTCGGTTCCGCTACGACGTAGCCCTGGTGTGCGCCTTGAAGGACCTG  
GAGGAAGACATCATGGAGGGCTGAGAGAGCGAGGCCTGGAGGACAGCGC  
TTGCACCTCGGGCTTCAGCGTCATGATCAAGGAGTCTGCGATGGCATGG  
GGGACGTCAGTGAGAAGCATGGTGGAGGGCCGGCCATCCCGAAAAGGCT  
GTGCGTTTCTCCTTACCATCATGTCCATCTCTATTCAAGCTGAGGGAGA  
AGAT-----GAGGCGATCACCATTT  
TCCGGGAGCCCAAGCCAACTCAGAGATGTCCTGCAAGCCGCTCTGCCTG  
ATGTTTGTGGATGAGTCGGACCACGAGACGCTCACAGGCGTCTGGGGCC  
TGTGGTGGCCGAAAGGAACGCTATGAAGCACAGCCGTCTCATCCTGTTTG  
TGGGCGCCTTTCTCGTCTCCTTCCGCTTCCACTTCCGGGGCACGGGCTAC  
GACGAGAAGATGGTGCAGAGATGGAGGGTTTGGAGGCCTCTGGCTCCAC  
TTACATCTGCACGCTGTGCGACTCTACTCGGGCAGAGGCCTCCACAACA  
TGACTCTCCACTCTGTACCCCGCAGCCACGATGAGAACCTGGAGCGTTAC  
GAACTTTGGAGACCAACCCTTATCTGAATCAGCTGAGGAGCTGCGAGA  
CCGAGTCAAAGGCGTCTCTGCCAAGCCCTTCATGGAGACCCAGCCACAC  
TGGACGCCCTGCACTGTGATATCGGCAACGCCACCGAGTTCTACAAGATT  
TTCCAGGATGAGATAGGGGAGGTCTATCACAAGGC---CAAC---CCAG  
CCGGGAGCAGCGTCGGAGCTGGCGAGCAGCCCTGGACAAACAGCTGAGGA  
AGAAGATGAAGCTGAAGCCTGTGATGAGAATGAATGGGAACATGCACGG  
AAGCTGATGACCCGGGAGGCAGTGGAGGCAGTGTGTGAGCTGGTGCATC  
AGAGGAGCGTCAGGAAGCC-----  
-----  
-----  
-----  
-----TCGTACACCATTGAGAT  
GGGCCCCAAGGGCCTCAATGGAAAGAAAGCCCCACACCTTTCTCTTGCT  
CCATCGAGGACCCTACCAAGCAGACCAAGTTCAAAGGCATCAAGACCTAC  
ATATCGTACCGAGTGACCCCAAGCCACAATGCGAGGCCTGTGTACCGGCG  
TTACAAGCACTTTGACTGGTTGTACAACCGTCTACTGCACAAGTTCACAG  
TCATCTCTGTGCCCCACCTGCCCGAGAAACAGGCAACGGGGCGCTTCGAA  
GAGGACTTCATCGAGAAGCGCAAGAGGCGGCTGATCCTCTGGATGGACCA  
CATGACCAGCCACCCGGTCTGTGCGAGTACGAGGGCTTTGAGCACTTCC

TCATGTGCGCTGACGACAAGCAGTGGAAAGCTGGGCAAGCGGCGGGCAGAG  
AAGGACGAAATGATGGGCGCCAACCTTCATGCTCACCTTCCAGATCCCAA  
CGAGCACCAGGACCTGCAGGATGTGGAGGAACGTGTGGACTCCTTCAAGT  
CCTTCGGCAAGAAAATGGATGACAGCGTCATGCAGCTTACGCATGTGGCC  
TCGGAAGTGGTGCAGCAAGCACCTCGGAGGCTTCCGCAAGGAATTCAGCG  
GCTGGGGAATGCTTTCAGAACGTCAGTCAGGCGTTCATGCTGGACCCTC  
CCCACTNNNNNNNNNNNNNNNNNNNNNNNNNNNNNNNNNCCTCTCGCCACTTTTCTCAA  
ACTGACATCCCTGGGTTTTATCAT

CGGAGTCGGCGTTCGTGGCAACCTCCTGATCTCCATCCTACTAGTCAAAG  
ACAAAAGCCTGCACCGCGGCCATACTACTTCTGCTGGACCTGTGCGCC  
TCGGACATCCTGCGCTCCGCCATCTGCTTCCCCTTCGTCTTACCTCCGT  
CAAGAATGGTTCCACCTGGACGTATGGCACACTTACCTGCAAAGTGATAG  
CCTTCTAGGGGTGCTGTCTGCTTTCATACAGCGTTCATGCTCTTCTGT  
GTGAGTGTGACACGCTACCTGGCCATAGCCCACCACCGTCTTACACCAA  
GAGGCTCACCTTCTGGACGTGTCTGGCAGTCATCTGCATGGTGTGGACGT  
TGTCGGTGGCCATGGCCTTTCCCCCGGTGTGGACGTAGGGACGTATTCC  
TTCATAAGGGAGGAGGACCACTGTACGTTCAGCACCCTCGTTCAGAGC  
CAACGACTCCCTGGGCTTCATGTTGCTCCTCGCCCTGATCCTCCTGGCCA  
CCCAGCTTGTCTACCTCAAGCTTATCTTCTTCGTCCACGACCGCCGGAAG  
ATGAAACCGGTCCAGTTTGTGCTTCCGCTCAGCCAGAAGTGGACCTTCCA  
TGCCCCGGGGCCAGCGGCCAGGCAGCGGCTAACTGGTTGGCGGGGT---

-----  
-----  
-----  
-----  
-----

-----NNGCAATCT

CGCTTTCACCCTGGCGTAGTACTGGACCTGGCACGGACC---GCAGCGT  
CCCACTTAGTAACAGCTTGCTATCCCAGCAACAAACCGAAGAGCCCACAG  
TTG---CATCCCCGCAGCGATGGTTTTGTACCC---CTGCCAATAACCGA  
CTGGACTTTGCGCCCTCGGCGTACGAYGCTGCCCGGGCTGCTGATTTTGC  
CGGTAACGCGGCCACCCTGCTGTCTTACGCAGCAGCTGGAGTAAAGGCAC  
-----TTCCACTGCCACTGCAGGGTGTCAAACAGACCTCTAGGTTAC  
TATGCCGACCCATCCG---GCTGG---GGCACACACACACCACCCAGTA  
CTGC-----ATAAGTCTAGCTCTGTGCTCTTGTCTGGCCAACAA  
ATTCTGTTG---GYAGAACAGGCA---CCTCCWACTACCTGG-----  
-TKGATGA---CGAG---GACAC---CATCCCAACAGAAAGGTCRCCC--  
-AT---CGGAGGGTCTAATGAG---GCAAAACCAAAAGACTT-----AT  
CAGA---ATCCTACTGGATAGAG---ACGCCGTCTTCAATGAAGTCGATT  
GATTCATGTGATTCTGGTATTTTTG---AGCAAGCTAAACGGAGAAGAAT  
CTCACCGTCTGCTACACCG-----GTTTCGGAAACAGTGTCCCGGT  
TGAAATCTGAG-----ACAGGCGAAGTCACAGAAAGAGAAGTGGCT  
TTGGGGATAAATCCGTTTCGCAGACGGGATGGGAGCTTTTAAAATCAACCA  
CAGCTCCCACGACCTGAGCTCCGG---TCAGACGGGCTTCTCCTCCAGG  
CT---CCCGGTAY---GCTGCTGCCGCCCTKGGT---CACCACCA----  
--CCACCCGACACACGTCAGCTCC---TACTCCACCGCAGCATTCAACTC  
CACCCGGGACTTTCTCTTCAGAAACCGGGGCTTCGGAGACGCAACCAG--  
-----CGCGCAGCACAGCCTGTTTGCCTCCGC---AGCGGGAAGT  
TT---T-----GCAGGGCCACATGGACACTCCGATGCCACGGGGCACCT  
GCTCTTCCCYGGACTCCACGAG---CAAGCCGCCAGCCATGCGTCTGCTTA  
ATGTCGTCAACAGCCAGATGCGCCTTGGCTTTACCGGGGACATGTACGGC  
CGGGCTGACCAGTAYGGCCACGTTACGAGCCCCGMT---CCGACCATA  
CGCCTCCTCCCAGCTGCATGGCTATGGCCCTATGAACATGAACATGGCGG

CT---CACCACGGGGCAGGGCCTTCTTCCGATACATGAGGCAGCCCATC  
AAACAAGAGCTCATCTGTAAGTGGGTCGAGCCCGAACAGTTGTGCAACCC  
CAAAAAGGCTTGCAACAAAACCTTTCAGCACGATGCACGAGCTCGTGACCC  
ACCTGACCGTGGAGCATGTGGGGGACCGGAGCAGTCGAACCATATTTGC  
TTTTGGGAAGAGTGCCTCCGAGAAGGAAAGCCGTTCAAAGCCAAATATAA  
ATTTGTTAATCATATCAGAGTRCACACCGGAGAGAAACCATTCCCATGTC  
CCTTCCCCGGCTGTGGAAA

>Coryphaena hippurus

AGTCTTCTCATTTCGAGCTGAGTTAAGCCAGCCTGGGTCACTTCTAGGAGA  
TGACCAAACCTATAATGTCATCGTTACAGCACATGCCTTCGTAATAATTT  
TCTTTATAGTTATGCCAATTATGATCGGAGGCTTCGGGAACTGATTAATC  
CCACTAATGCTTGGCGCTCCTGATATAGCATTCCCTCGAATAAATAACAT  
AAGCTTTTGACTTCTTCCACCATCATTTCTTCTCCTTCTAGCCTCTTCAG  
GGGTAGAAGCAGGAGCAGGAACTGGTTGAACGGTCTACCCACCTCTGGCG  
GGTAACTTAGCCCATGCTGGGGCCTCTGTAGATTTAACAATTTTCTCCCT  
GCATTTAGCCGGGGTATCATCAATTCCTGGGGCAATCAATTTTATTACAA  
CTATTATTAATAATAAAACCCCCACAGTAACGATATACCAAATTCCTACTA  
TTCGTGTGAGCTGTACTAATTACAGCTGTACTACTACTCCTATCACTTCC  
TGTCCTAGCTGCGGGAATTACAATACTGCTAACAGACCGAAATTTAAATA  
CAGCTTTCTTTGACCCAGCGGGAGGAGGGGATCCTATCCTATAACCAACAC  
CTGTTT-----  
-----  
-----  
-----

-----TTCCTGGAGAGAAACCTTACCCCTCTAACTGCCTTGG  
CATGCTGTTGCTGTCCGACGCCCACCAGTGCACCAAGCTGTCAGAGCTCT  
CTTGGGGCATGTGCCCTCAGCAACTTTCCTGCTATTTGCAAGACAGAGGAC  
TTCCCTCAACTGCCCAAAGATATGGTAGTCCAGCTTTTATCACACGAGGA  
GCTAGAGACAGAAGATGAGAGACTGGTTTATGAAGCTGCCCTTAACTGGA  
TCAACTACGACCTGGAGAGGAGGCACCTGCCACCTTCCAGAGCTTCTGAGA  
ACGGTCCGCCTCGCCCTGCTGCCTGCCATTTTTCTGATGGAAAACGTCTC  
AACGGAGGAGCTGATCAATGCCCAAGCCAAGAGCAAGGAGCTGGTGGATG  
AAGCTATTCGCTGCAAGCTGAAAATCCTGCAGAACGAYGGCGTTGTCAAC  
AGCCCGTGCCTCGGCCGAGAAAACCCAGCCAYGCCCTGTTCTTCTGGG  
CGGGCAGACTTTCATGTGTGACAAGTTGTAYCTGGTAGAYCAGAAGGCCA  
AAGAGATCATACCCAAGGCTGACATCCCCAGCCCCAGGAAGGAGTTCAGT  
GCCTGCGCCATCGGCTGTAAGGTGTACATCACCGGTGGGA--GAGGCTC-  
CGAGAATGGTGTGTCCAAGACGTGTGGGTCTACGATAACCGTCCACGAGG  
AATGGTCCAAAGCAGCTCCCATGCTCATCGCTCGGTTCCGGCCATGGCTCC  
GCAGAGCTGAAACATTGCTCTACGTGGTAGGAGGTCACACGGCGGCCAC  
CGGTTGCCCTCCAGCTTCTCCGTGAGGACAATTACATTGTTGTGTTAGT  
CGCTCGACGACGAGGCTGATACTGAACGAAGCGGAGCTCATCATGGCGCT  
GGCCAGGAGTTCCAGATGAGAGTGGTGACAGTTTCCCTGGAGGATCAGT  
CCTTCCCCAGTATTGTGCAGGTGATCAGCRGCGCTTCCATTCTAGTTAGC  
ATGCACGGAGCCCAGCTCATCACCTCRCTTCTTCCCTCCCCAGAGGAGCCAC  
TGTGGTGGAACTGTTCCCTTCCGCGTGAACCCGGAGCAGTACACCCCTT  
ATAAAACCCTGGCCTCCCTTCCCTGGCATGGACCTTCACTACATCTCCTGG  
AGGAACAGCAAGGAGGAAAACACTATCACCCACCCAGACAGACCCCTGGGA  
ACAAGGAGGCATTATTCACTTGGACAAAGAGGAGCAGGAGCGAATACTGG  
CCAGCAAGGACGTTCCAGGCACCTGTGCTGCCGAAACCCCGAGTGGCTC  
TTCCGGATCTACCAGGACACATTGGTGGACATCCCTTCCCTTCCCTGGAAGT  
CCTCAA---AGAGGGCATGAAG---GCCAAGCCAGCTTTAAGAA---GT  
CTAAGCCAGCCAGCATGGTCCACCCAGGCCGAGTCCGGGAGCCTCAATGT

CAGACCTCAGTCCAAACCAGTAATGAGGCCAAGCTCACAGTCTCCTGGCA  
GATCCCATGGAATTTAAAATACCTGAAGGTAAGAGAGGTGAAGTACGAGG  
TCTGGATCCAGAAAAAGATGCCAGCAAGGGAACACTGGAGGATCAAATC  
ATCCAGGCTAACCTGCGCTGGAAGCCTTTGGCAACGCCAAGACGTTGAG  
AAATGACAACCTCATCCCGTTTTGGAAAATTCATTCGAATTCACTTCGGCA  
CGAGTGGCAAACCTGTCATCCGCTGACATCGAGACATACCTGCTGGAGAAA  
TCACGTGTCACCTTTCAGCTCAAGGCTGAGAGGAACTACCACATCTTCTA  
TCAGATCCTGTCCAATCAGAAGCCGGAACCTGCTGGACATGCTGCTGATCA  
CCAACAACCCGTATGACTACTCCTACATCTCCCAAGGAGAGGTGACGGTC  
GCTTCTATCAATGACTCGGAGGAGCTAATGGCCACTGACAGCGCCTTTGA  
CGTGCTTGGCTTCACTGCAGAGGAGAAGATGGGCGTCTATAAACTGACTG  
GTGCCATCATGCATTATGGCAACATGAAGTTCAAAACAGAAACAGCGTGAA  
GAGCAGGGTGAACCGGATGGGACCGAGGCCGCTGACAAATCAGCTTACCT  
AATGGGACTGAACTCCGCTGACCTCATCAAAGGCCTTTGCCACCCAAGAG  
TCAAGGTAGGAAATGAATATGTCACCAAAGGCCAAAGTGTGGATCAAGTC  
TACTATCCCAACAAGGAGGCCTTCAAGTGTGAGGAGTGTGGGAAACACTA  
CAACACCAAGCTGGGGTATAAGCGTCATGTGGCCATGCACTCTGCCACAG  
CAGGCGATCTCACCTGTAAAGTGTGCATGCAGAGCTACGAGAGTACACCC  
ATCCTCCTGGAGCACCTCAAGAGCCACTCCGGGAAATCCTCCGGTGGCAC  
CAAGGAGAAGAAAACCCCGTGCAGCCACTGTGACCGTCGTTTTCTACACAC  
GCAAGGATGTGCGACGACACATGGTGGTCCACACGGGCCGGAAGGACTTC  
CTGTGCCAGTACTGTGCCAGCGCTTCGGCAGGAAAGACCACCTGACGCG  
CCACGTGAAGAAGAGCCACTCACAGGAGCTGTTGAAGATCAAGGCGGAGC  
CTCCAGACATGTTAGGTCTCTTAGCCTCCGGATCCCCACCTTGCTCTGTG  
AAAGAGGAACTCAGCCCATGATGTGCGGCATGGGTCCTAACAAAGACCC  
CATGATGGGCAAAGCGTTCCCAGTGGGGCCCTTTTCCAATGGGCATGT  
ACAACCCCAACCAT-----CTCCAGGCAATGTGCAATACTGGGGTGGGT  
CACCCA-----CACCCGTCCCTAATGCCCGCTCCCTGTCTGCAGCTAT  
GGGCATGGGCTGTACATGGAATATCTCATCTACGCCTCTTTCTCATTCA  
TGGGATGTTTACAAATTAGYGATGGGTCAAATATCGTCAACCTGCTGGCA  
AGTAACTCTCCGAGTGTTCATATGCTCTGACCCAGCAGAAATACTTCAG  
TAACTACAGCCCCGTGATTGGGTTTTACATTTATGAGCCCATCGAGTACT  
GGAATCCACGGTGCAGGAGCACCTGAAAACCTGAGTCATGGTTCAAC  
AAGATCTCCTGGATGGACAACTTTTTCCACTACCTGCGGGTGGTCAACGT  
GAGCGCTCAACTAAAAGCGACTTCATCACCATCCTCAAAGGCTCCTTCC  
TGCGCAGCCAGAGTACCAGCATTTCACAGAGGACATCATATTCTCCAAG  
A---ACCGTGAGACCG-----ATGAGTATGAYATCATTGCCTCACGGAT  
GTACCTGGTGGCGCGGACGACCCGAGAAGAAGCGGAGGAAGTGGTGGAGC  
TCCTGGAAAAGCTTCGTCCGTTGATGCTAATCAACAGCATCAAGTTCATT  
GCCTTCAATCCCACATTTGTGTTTCATGGACCCTACAGCTCCTCTGTCAT  
CTCACCCATCCTGACCTCAGGCTTCAGCGTACTCACTATCCTCATCCTCA  
CTTTCTTCCCTGGTCATCAACCCATTTGGGAAACTTCTGGCTCATCCTCACG  
GTCACGCTGTGGAGCTGGGCGTCTTGGGTTTGATGGGCTTTCACCAGTT  
TGAATGGCAGCCAGCTCTCAAGAATGTGTCAACATCTTGCAATGTTGGCA  
TTATTAATGGCCTCTCTGGATGGGCTTCCCTCGGTGGATGACTCCCAGCT  
GACACCATCACTCGACGGTTCGGCTATGATGTGGCACTGGTGTGAGCATT  
AAAAGATCTGGAGGAGGACATCATGGAGGGGCTGAGAGATAGTCGGATGG  
AAGACAGTGCTTGACCTCAGGCTTACTGTCATGATCAAGGAATGTTGT  
GATGGCATGGGCGATGTCAGCGAGAAGCATGGTGGAGGACCAGTTATTCC  
TGAGAAGGCTGTACGTTTCTTTTCACTGTTATGTCATCTCTGTCATGG  
TAGACAATGAGGGG-----AAGGAG  
GTTACCATCTTACCCGAACCAAGGCCAAACTCAGAACTGTCCTGTAAGCC  
CCTTTGCTTGATGTTTGTGGATGAGTCAGACCACGAGACGCTCACAGCGC



TCCTGGGGCCTGTAGTTGCAGAGCGTAATGCCATGAAAGAGAGCAGGCTC  
ATCCTATCCATAGGTGGCCTACCTCGCTCCTTCCGCTTCCACTTCAGAGG  
TACAGGATACGATGAGAAGATGGTGCAGAGATGGAAGGCCTGGAGTCTT  
CTGGGTCCACATATATCTGCACTCTATGCGACTCCAGTCGAGCAGAGGCC  
TCTCAAACATGGTCTTACACTCCATCACCCGCTGCCACGAAGAGAACCT  
AGATCGTTATGAAATATGGAGAACCAACCCCTTCTCTGAGTCTGCAGATG  
AACTGCGAGACAGAGTCAAAGGAGTCTCTGCAAAACCCTTTATGGAGACC  
CATCCCACACTGGACGCATTACACTGTGACATTGGCAATGCCACTGAGTT  
CTACAAAATCTTCCAGGATGAGATTGGAGAAGTGTATCAAAAGGT---CA  
AC---CCCAGCCGAGAGGAAAGGCGCAGCTGGAGGGCAGCTCTAGATAAA  
CAGCTGAGGAAGAAGATGAAGCTGAAACCGGTGATGAGGATGAATGGGAA  
CTACGCCCCGAGGCTAATGACCCTGGAGGCGGTTGAGGTGGTGTGTGAAC  
TGGTGCCCTCAGAGGAGAGGAGGGAGGCCCTGAGGGAGCTCATGAGGCTT  
TACCTCCAGATGAGGCCCTGTGTGGCGCGCCACCTGCCAGCAAAGGAATG  
CCCAGACCAGCTGTGCCGCTATAGCTTTAACTCTCAGCACTTTGCTGACC  
TCCTCTCCTCCACCTTCAAATATAGATAACAATGGAAAGATAACCAATTAC  
CTTACAAAGACTCTGGCCCATGTCCCTGAAATCATAGAGAGAGATGGATC  
CATAGGAGCATGGGCCAGTGAGGGGAATGAATCGGCAAACAAATCGTACA  
CCATCGAGATGGGCCCCCTGGGTCTCGGTGGAAGGAGAACCCGCGACCT  
TTCTGCTGCTCCATCGAAGACCCCAAAAACAGACAAAGTTCAAAGGCAT  
CAAGACCTATATTTTCATACCGGGTCACCCCGAGCCACACGGGGCGTCTTG  
TCTACAGGCGCTACAAACACTTTGACTGGCTCTACAATCGCCTGCTGCAC  
AAGTTCACTGTGATCTCTGTGCCTCACCTGCCCGAGAAACAGGCCACGGG  
GCGATTTGAGGAAGACTTCATTGAGAAGCGTAAAAGACGACTGATACTGT  
GGATGAACCACATGACCAGTCACCCGGTCTCTCCAGTACGAAGCTTT  
GAGCACTTTCTGATGTGTGCTGACGACAAACAGTGAAACTGGGAAAGAG  
ACGAGCGGAGAAGGACGAGATGGTTCGGCGCCATTTTCATGCTTACACTTC  
AAATCCCCAACGAGCACCAGGACCTTCAGGATGTAGAGGAGCGGGTGGAC  
TCCTTCAAATCCTTTGCTAAAAAATGGACGACAGCGTGATGCAGCTCAC  
GCATGTTGCCTCGGAGCTGGTGCGAAAACATCTGGGTGGGTTTCAGGAAGG  
AGTTCCAGCGGCTGGGAAATGCCTTCCAGTCTATCAGCCAGGCCCTTTATG  
CTGGACCCCCCCCCACAGCTCGGATGCCCTCAACAACGCCATCTCACATCC  
TCTCGCCACGTTCCCTCAAACAGCTCTCTGGGTTTCATCATTGGAGTCG  
GTGTGGTTGGGAACCTCCTGATCTCCATCCTGCTGGTCAAAGACAAGAGC  
CTGCACCGAGCGCCCTACTATTTCCCTGCTGGACCTGTGCGCCTCTGATAT  
CTTGCCTCCGCCATCTGCTTCCCCCTTTGTCTTACCTCAGTCAAGAATG  
GCTCTGCCCTGGACCTACGGCACGCTGACCTGCAAAGTGATTGCCCTCCTG  
GGTGTGCTCTCCTGTTCCACACAGCGTTCATGCTGTTCTGTGTCAGTGT  
CACTCGCTACCTGGCCATCGCACATCACCGTTTCTACACCAAGAGGCTGA  
CCTTCTGGACCTGTCTGGCTGTCTGTCATGTCATGGTGTGGACGCTGTCAGTA  
GCTATGGCATTCCCGCCGGTGTAGATGTAGGGACGTACTCTTTTATCCG  
GGAAGAGGACCAGTGCACATTCCAGCACCGTTCCCTTCCGGGCGAATGATT  
CGCTGGGCTTCATGCTCCTCCTGGCGCTCATCCTCCTGGCCACACAGCTG  
GTTTACCTCAAGCTCATCTTTTTTGTCCATGACCGTCGAAAGATGAAGCC  
TGTCCAGTTCGTGCCCTGCTGTCAGCCAGAAGTGGACCTTCCATGGGCCAG  
GTGCCAGTGGGCAGGCGGCGGCAACTGGCTGGCTGGATTTGGTCTGTGGC  
CCCACCCACCTACTTTGCTGGGTATCCGGCAGAACAGCAACGCAGCGGG  
CCGCAGGCGTCTACTGGTATTGGATGAATTCAAAACAGAGAAGCGGATTA  
GTAGGATGTTCTACATCATGACGTTTTTCTTCCCTGGCACTGTGGGGGCC  
TACCTGGTGCCTGCTACTGGCGGGTGTGTTGCAAGGGGCCCGTAGTCCC  
TGGGGGCTATCTGACGGCAGCCGTGTGGATGAGCTTTGCCAGGCTGGCG  
TCAATCCTTTTCATCTGCNNNNNNNNNNNNNNNNNNNN-----  
-----

-----  
-----  
-----  
-----  
-----  
-----  
-----  
-----  
-----  
-----  
-----  
-----  
-----  
-----  
-----

-----NNNNNNNNNNNNNNNNNAAGTCACAGAGAG  
AGAAGGGGGCGCTGGGGATCAATCCGTTCGCGGATGGGATGGGCGCCTTCA  
AAATAAACCCAGCTCCCACGATATAGGCTCCGG---ACAGACGGCGTTT  
TCCTCCCAGGCA---CCCGGCTAC---GCGGCGGCCGCCCTGGGA---CA  
CCATCA-----CCACCCGACCCACGTTGGCTCT---TACTCCACGGCGG  
CTTTCAACTCCACCAGGACTTTCTCTTTCAGAAATCGGGGTTTCGGGGAC  
GCCGCCGG-----GGCGCAGCACAGTTTGTTCGCCTC-----  
---TGGAAGTTT---C-----GCAGGGCCACATGGACTC  
CGGATGCGGCGGGCCACCTGCTCTTCCCCGGGCTGCACGAG---CAAGCGGCGAGCCAT  
GCCTCCTCCAACGTGGTCAACAGCCAGATGCGCCTGGGCTTCTCGGGGGA  
CATGTACGGACGGGCCGACCAGTACGGCCACGTTACCAGCCCCGCGT---  
CCGACCACTATGCCTCGACCCAGCTGCACGGCTACGCCCCATGAACATG  
AATATGGCCGCG---CACCACGGAGCAGGGGCCCTTCTTTTCGCTACATGAG  
GCAGCCGATCAAACAAGAGCTCATCTGCAAGTGGATCGAGCCGGAGCAGC  
TGACGAATCCCCAAAAGTCGTGCAACAAAACCTTTTAGCAGATGCACGAG  
CTGGTGACCCATCTGACGGTGGAGCATGTGGGGGGACCGGAGCAGACCAA  
CCACGTCTGCTTCTGGGAGGACTGCTCCAGAGAAGGAAAGCCATTCAAAG  
CCAAATACAAAACCTTGTAATCATATCAGAGTACACACCGGAGAAAAGCCC  
TTTCCCTGCCCGTTCCCCGGCTGTGGCAAG

>Coryphaenoides rupestris

-----  
-----  
-----  
-----  
-----  
-----  
-----  
-----  
-----  
-----  
-----  
-----  
-----  
-----  
-----

-----TTCTGGAGAGGAACCTGCACCCCCCAACTGCCTGGG  
CATGCTGCTGCTCTCCGACGCCACCAGTGCACCAAGCTCTCCGAGCTCT  
CCTGGAGCATGTGCTGAGCAACTTCCCCACCATTTGCAAGACAGAGGAC  
TTCTCCAACCTGCCCCAAGACATGGTCGTGCAGCTTCTGTCCCACGAGGA  
GCTGGAGACGGAAGACGAGAAAACCTGGTCTACGAGGCCGCGCTGAACTGGG

TTACCTACGACCTTCCGGGGAGGCACCCCCACTTGCCGGAAGTCTGAAA  
ACGGTGCCTCTGGCTCCTGCCCAGCCTTTCTCATGGAGAACGTCTC  
CATGGAGGAGCTGATCAACGCGCAGACCAAGAGCAAGGAGCTGGTGGATG  
AGGCCATCTGCTGCAAGCTGAAGATCCTGCAGAACGACGGCGTGGTCGAC  
AGCCCGTGGCCCCGTCCCCGGAAGACCAGCCACGCGCTTCTCTGTGGG  
CGGGCAGACCTTCATGTGCGACAAGCTCTACCTGGTGGACCAGAAGGCCA  
AAGAGATCATTCCCAAGGCGGACATCCCCAGCCCCGCAAGGAGTTCAGC  
GCCTGCGCCATCGGTGCAAGGTCTACATCACGGGCGGCC--GCGGCTC-  
GGAGAACGGCGTGTCCAAGGATGTGTGGGTCTACGACACCGTGCAGGAGG  
AGTGGTCCAAGGCGGCGCCATGCTCATCGCCCCGTTCCGGCCACGGCTCC  
ACGGAGCTGAAGCACTGCCTGTACGTGGTGGGCGGGCACACGGCCGCCAC  
GGGCTGCCTCCCCGCTCGCCGTCCGGAGGATTACATTGTGGTCTTCTCT  
CGCTCCACAACGAGGTTGATCCTAAACGAAGCGGAGCTGATCATGGCGCT  
GGCCAGGAGTTTCAGATGAGAGTCTTGACGGTGTCCCTGGAGGAGCAGT  
CTTTTACCAGCATCGTGCAGGTGATCAGCGGAGCTCCATGCTGTTCAGT  
ATGCACGGCGCACAGCTCATCACGGCGCTGTTTCCCTGCCCGAGGTGCAGC  
CGTGGTGGAGCTGTTCCCCTACGCCGTGAACCCAGAGCAGTACACCCCAT  
ATAAAAACCTGGCCTCCCTGCCGGGCATGGACCTCCAGTATGTCTCCTGG  
AGGAACACGATGGAGGAGAACACCGTCACTCACCCGGACCGGCCCTGGGA  
CCAAGGGGGCGTCTACACTTGGAGAAGGAGGAACAAGAGCGCATCCTAG  
CCAGCAAGGACGTCCCCAGGCACCTGTGCTGCCGTAACCCAGAGTGGCTT  
TTCAGAATCTACCAGGACACTTTGGTGGACATCCCTTCACTCCTCGAGGT  
GCTCAA--GGACGGCCTCAGA--ACCAGGCCAACTTGAAAAA--GA  
GCAAGGCGGCCAGCACAGTTCACCCCTGGGCGAGTCCGAGAACCCAGTGC  
CAGACCTCGGTCCAAGCCACCAACGAGGCCAAACTCACAGTGTCTGGCA  
GATCCCCTGGAACCTGAAGTTCCCTGAAGGTGAGAGAGGTGAAGTACGAGG  
TGTGGATCCAGAAGAAGGACGCCAGCAAAGGAACCCCTGGAGGATCAAATC  
ATCCAGGCCAACCCCTGCCTTGAGGCCTTTGGTAATGCCAAAACCCCTGAG  
AAATGACAACCTCCTCACGTTTTTGGAAAGTTTTATCCGATTCACTTTGGGA  
ACAGTGGCAAGCTGAGCTCTGCGGACATTGAGACCTACCTCCTAGAAAAG  
TCCAGAGTCACCTTTCAGCTTAAGTCAGAGAGGAACATCACATATTCCTT  
CCAGATCTTGTCCAATCAGAAGCCAGATCTGCTGGACATGCTGCTGATAA  
CCAATAACCCGTATGATTACTCCTACATCTCCCAAGGAGAGGTAACGTG  
GCGTCCATCAACGACTCTGAGGAGCTCATGGCCACTGACAGTGCATTTGA  
CGTCCCTGGCTTACCCCTGGAAGAGAAGATGGGGGTGTACAAGCTGACAG  
GTGCCATCATGCACTATGGCAACATGAGGTTCAAGCAGAAGCAGCGTGAG  
GAGCAGGCAGAGTCCGATGGGACTGAAGCAGCTGATAAATCAGCGTACCT  
CATGGGTTTGAACCTCTGCAGACCTCATCAAATGCCTCTGCCACCCCAGGG  
TGAAGGTAGGAAATGAATATGTCACCAAAGGTCAAGGGGTGGACCAAGTC  
TACTAC-----

-----  
-----  
-----  
-----  
-----  
-----  
-----  
-----  
-----  
-----  
-----  
-----  
-----  
-----  
-----  
-----

-----TACCTCATCTACGCTTCCTTCTCCTTCA





>*Cottus carolinae*

AGCCTCCTAATTCGAGCAGAATTAAGTCAACCCGGCGCCCTTTTAGGGGA  
CGACCAGATTTATAATGTAATTGTTACAGCCCATGCTTTCGTAATAATTT  
TCTTTATAGTAATACCGATTATAATCGGAGGTTTCGGGAACTGGCTCGTT  
CCCCAATGATTGGCGCTCCTGATATGGCCTTTCTCGAATGAATAATAT  
GAGCTTTTGACTTCTTCCCCCATCTTCTTACTCCTCCTTGCTCCTTCGG  
GAGTCGAAGCAGGAGCCGGAACCGGATGAACAGTTTACCCGCCCCTCGCC  
GGAAACCTCGCCACGCAGGAGCCTCTGTTGACCTAACAACTTCTCCCT  
TCACCTAGCAGGTATCTCCTCTATTCTTGGAGCAATCAACTTTATCACAA  
CTATCATTAACATAAAGCCCCCTGCTATTTACAAATACCAGACCCCGCTC  
TTTGTATGATCTGTTCTTATTACTGCTGTCTACTGCTTCTTTCCCTCCC  
CGTTCTTGCCGCCGGCATCACAATACTCCTGACAGACCGAAATCTTAACA  
CCACCTTCTTTGACCCTGCCGGAGGAGGGGACCCAATCCTTTACCAACAT  
CTC-----

-----  
-----  
-----  
-----  
-----  
-----  
-----  
-----  
-----  
-----  
-----  
-----  
-----  
-----  
-----  
-----  
-----  
-----  
-----  
-----

-----GGATGATTACGTTGTTGTCTTCAGT  
CGCTCCTCAACCAGGCTGATTCTGAATGAAGCAGAGCTAATCATGTTACT  
GGCCAGGAGTTCAGATGAGAGTGGTACGGTGTCCCTTGAGGATCAGT  
CTTTCCCAGTATCGTCCAGGTGATCAGCGCGCTTCTGTGTTGGTCAGT  
ATGCATGGCGCTCAGCTCATCCTCACTCTTCTCCTCCCAGAGGAGCTGC  
TGTGGTGGAGCTGTTCCCTTTGCTGTGAACCCAGAGCAGTACACCCCGT  
ATAAAACCCCTCGCCACCCCTTCCAGGCATGGACCTTCACTATATCTCCTGG  
AGGAACATTCAGGAGGAGAACACCATCACCCACCCGACAGACCCCTGGGA  
GCAAGGGGGCATCGCTCACTTGGAGAAGGAGGAGCAAGAGCGTATACTGG  
CGAGCAGAGATGTCCCAGGCACCTGTGCTGTGCGCAACCCAGAGTGGCTC  
TTCCGGATCTACCAGGACACTTTGGTGGACATCCCTTCTTCTYCTGGAAGC  
CCTTAA---AGAGGGCATGAAG---ACAAAGCCCAGCATGAAGAA---GT  
CAAAGCCGGCCAGCACAGTCCACCCGGGCCGGGTCAGAGAACCCAGTGT  
CAGACCTCGGTACAAACCACCAACGAGGCTAAACTCACAGTATCCTGGCA  
GATCCCTTGGAACCTGAAATACTTGAAGGTGAGAGAGNNNNNNNNNNNNNNNNNAAAAAGAGAC  
ACCA

GCAAGGGGACGCTGGAGGACCAGATCATCCAGGCTAACCCAGCGCTGGAA  
GCTTTCGGTAATGCCAAAACGCTGAGGAACGACAACCTCGTCTCGTTTTGG  
AAAATTCATCCGAATTCACCTTGGTACGAGCGGGAAAGCTGTGCTCTGCCG  
ACATCGAGACGTACTTGTGGAGAAGTCTCGGTGCACCTTCAACTCAAG

GCAGAGAGGAACTACCACATCTTCTACCAGATCCTGTCCAATCAGAAGCC  
AGAGCTGCTGGACATGCTGCTGATCACCAACAACCCGTACGACTACTCCT  
ACATCTCCCAAGGGGAGGTGACGGTGCCATCCATCAACGACTCGGAGGAG  
CTGCTGGCCACCGACAGCGCCTTCGATGTGCTCGGCTTCACTGCGGAGGA  
GAAGATGGGCGTCTACAACTCATCGGCGCCATCATGCACTACGGCAACA  
TGAAGTTCAAACAGAAGCAGCGTGAGGAGCAGGCTGAGCCAGACGGCACA  
GAGGCGGCTGATAAAACGGCTTACCTCATGGGCCTGAACTCTGCTGACAT  
CATCAAGGGGCTGTGTCATCCCAGAGTCAAGGTGGGAAATGAATATGTAA  
CCAAAGGCCAAAGTGTAGACCAGGTGTACTACNNNNACAAGGAAGCCTTCAAGT  
GTGAGGAGTGC GGCAAGCACTACAACACCAAGCTGGGATACAAGCGTCAT  
GTGGCCATGCACTTTGCCACGTCCGGAGATCTCACCTGCAAAGTGTGCAT  
GCAGAGCTACGAGAGCACACCGGTGCTCCTGGAGCACCTCAAGACCCATT  
CCGGGAAGTCTTCGGGCGGTGCCAAGGAGAAAAAGCACCCGTGCGACCAC  
TGTGACCGTCTGTTTCTACACGCGCAAGGATGTGAGACGGCACATGGTGGT  
CCACACGGGTGCGAAGGACTTCCCTGTGCCAGTACTGTGCCCAGCGCTTCG  
GCAGGAAGGACCATCTGACACGTACGTGAAGAAGAGCCACTCGCAGGAG  
CTGCTGAGGATCAAGACGGAGCCTCCAGATATGTTAGGTCTTTTAGCGTC  
CGGGTCACCACCTTGCTCTGTGAAGGAGGAGCTCAGCCCCATGATGTGCG  
GCATGGGTCCCAACAAGACCCCATGATGGGCAAACCGTTCCCCAGCGGG  
GCCCCTTTCCCGATGGGCATGTACAACCCCCACCAT-----CTCCAGGC  
CATGTCCTAATTCTGGGGTGGGTACCCG-----CACCCGTCCCTGATGC  
CCAGTCCCTTGTCTGCAGCTATGGGCNNNNNNNNNNNNNNNNNNNTATCTCATCTACGCCTCTTTCTCA  
TTCATGGGATGTTTACAGATCAGTGATGGATCAAAATATAGTGAACCTGCT  
GGCCAGTAACTCCCCGAGTGTTTCGTACGCTACGACGCAGCAGAAATACT  
TCAGTAACTACAGTCCCGTATCGGCTTCTACATTTACGAGCCCATTGAG  
TACTGGAACCTCCACGGTGCAGGAGCATCTGAAGACCCCTGAGTCATGGCTT  
CAACAAGATCTCTTGATGGACAACCTTTTTTCCACTACCTGCGTGTGGTGA  
ACGTGAGCGCGTCGACCAAGGGCGACTTTCATCTCCATCCTCAAGGGCTCC  
TTCCCTCCGACGCCCGGAGTACCAGCACTTCACTGAGGACATCATATTTCTC  
CAAGA---ACC GCGAGACTG-----ATGAGTACGACATTATCGCCTCGC  
GGATGTACCTGGTGGCACGGACGACGGAGAAGAAGCGCGAGGAGGTGGTG  
GAGCTTCTGAAAAGCTTCGTCCCTTGATGCTGATCAACAGCATCAAGTT  
CATTGCCTTCAATCCCACGTTTGTGTTTCATGGACCGCTACAGCTCGTCCG  
TCATCTCGCCATCCTGACCTCAGGGTTCAGCGTACTCACAATCCTCATC  
CTCACTTTCTTCTGTCATCAACCCGTTGGGGAACCTTCTGGCTCATCCT  
CACGGTAACGTCCGTGGAGCTGGGCGTCTTGGGTTGATGGGCTTTCACC  
AGTTTGAGTGGCAGCCAGCTCTCAAGAATGTGTCTACATCTTGCAGTGTT  
GGCATTATTAATGGGCTCTCTGGATGGGCTTCCCTCGGTGGATGATTTTCC  
AGCTGACACCATCACTAGACGGTTTCGCTACGATGTGGCTCTGGTGTGAG  
CATTAAAGGATCTGGAGGAGGACATCATGGAGGGGCTGAGAGAGAGTGGG  
ATGGAAGACTGTGCTTGCACCTCAGGCTTCAGTGTGATGATCAAGGAATC  
CTGTGATGGCATGGGCGATGTCAGCGAGAAGCACGGTGGAGGACCAGCTG  
TTCCCTGAGAAGGCTGTGCGTTATTCTTTCACTGTTATGTCTGTCTCTGTC  
CTGGCAGACGAGCAGGAG-----GA  
AGAGGTTACCATCTTCACTGAGCCAAAGCCAAACTCCGAACCTGTCTGTA  
AGCCCCTTTGCCTGATGTTTGTGGACGAGTCAGACCATGAGACGCTCACA  
GCTGTCCCTGGGGCCTGTAGTTGCCGAGCGTAATGCAATGAAAGAGAGCAG  
GCTCATTTCTGTCCGTGGGTGGACTACCTCGTTCCCTCCGCTTTCACTTCA  
GAGGCACGGGATATGATGAGAAGATGGTGC GCGAGGTTGAGGGCATGGAG  
GCCTCAGGGTCCACCTACGTCTGCACTCTTTGCGACTCCACTCGGGCAGA  
GGCTCTCAAAACATGGTGCTACACTCCATCACTCGCAGTCATGAAGAGA  
ACCTAGATCGTTACGAAATATGGAGAACCAACCCCTTTTCTGAGTCTGTA  
GATGAGCTGCGGGACAGGGTCAAAGGATCTCTGCTAAGCCCTTCATGGA

GACCCAGCCAACGATGGATGCATTACATTGTGACATCGGCAATGCCACTG  
AGTTCTACAAAATCTTCCAGGACGAGATCGGAGAGGTGTACCAAAAGGT-  
--CAA--CCAGCCGGGAGGAACGGCGCAGCTGGAGGGCAGCCCTGGA  
TAAACAGCTAAGGAAGAAAATGAAGCTTAAACCGGTGATGAGGATGAATG  
GGAACATATGCCCGCAGGCTGATGACCCAAGAGGCTGTGGAGGTGATCTGT  
GAGCTGGTGCCTCTGAGGAGAGGAGGGAGGCCCTGAGGGAGCTGATGAG  
GATCTACATTAGATGAAGCCTGTGTGGCGCGCCACCTGCCCTGCCAAGG  
AGTGCCCCGACCAGCTGTGCCGCTACAGCTTCAACTCCCAGCGCTTTGCT  
GACCTTCTCTCCTCCACCTTCAAATACAGGTACAAATGGAAAGATAACCAA  
TTACCTGCACAAGACCCTGGCCATGTGCCCGAAAATCATAGAGAGAGATG  
GATCCATAGGAGCCTGGGCCAGCGAAGGGAACGAGTCTGCAAACAAGTCG  
TACACCATCGAGATGGGCCCGCGGGGCCCTGTGGAAGGAGAGCCCGCA  
ACCGTTTTCTGCTCCATCGAGGACCCACGAAACAGACAAAGTTCAAGG  
GCATCAAGACGTACATTTTCGTACCGGGTCACGCCAAGCCACACGGGGCGC  
CCCGTCTACCGGCGCTACAAGCACTTCGACTGGCTGTACAACCGCTTGCT  
GCACAAGTTCACTGTGATCTCCGTGCCCTCACCTGCCCGAGAAGCAGGCCA  
CGGGGCGCTTCGAGGAGGACTTCATCGAGAAGCGCAAGCGGCGACTGATT  
CTGTGGATGAACCACATGACCAGCCACCCGGTGCTCTCCAGTACGAGGG  
CTTCGAGCACTTCTGATGTGCGCCGACGACAAGCAGTGGAAGCTGGGCA  
AGAGGCGGGCGGAGAAGGACGAGATGGTGGGCGCCACTTCATGCTGACC  
CTGCAGATCCCCAACGAGCACCAGGACCTTCAGGACGTCGAGGAGCGCAT  
CGACACCTTCAAGCCTTTTGCCAAGAAAATGGACGACAGCGTGATGCAGC  
TCACGCACGTGCGCTCGGAGCTGGTGCCTAAGCACCTGGGCGGTTTCAGG  
AAGGAGTTCCAGCGGCTGGGGAATTTCTTCCAGTCCGTGAGCCAGGCGTT  
CATGCTGGACCCCCCCCCAAAGATCAGAGGCCCTCAACAAAGCCATCTCCC  
ACCCCTCTCGCCACGTTCCTCAAACCTGACCTCTCTGGGTTTTATCATTTGGA  
GTCGGTGTGGTTGGAAACCTCCTGATCTCCATCCTGCTGGTCAAAGACAA  
GAGTCTGCACCGAGCGCCCTACTATTTCTGCTGGACCTGTGCGCCTCTG  
ACATCCTGCGCTCTGCCATCTGCTTCCCCTTTGCTTTCACCTCGGTCAAG  
AATGGATCGGCCTGGACCTACGGCACGCTGACCTGCAAGGTGATCGCCTT  
CCTGGGTGTGCTCTCCTGTTTTCCACACGGCGTTTATGCTCTTCTGCGTCA  
GCGTCACACGCTACCTGGCCATCGCACACCACCGTTTTCTACACCAAGAGG  
CTGACCTTCTGGACCTGTCTAGCCGTCTATCTGCATGGTGTGGACGTTGTC  
CGTGGCTATGGCGTTCCCGCCGGTGTAGATGTAGGGACGTACTTTTTTA  
TCCGGGAGGAGGACCAGTGCACGTTCCAGCACCGCTCCTTCAGGGCGAAT  
GATTCGCTGGGCTTCATGCTCCTGCTGGCGCTCATCCTCCTGGCCACACA  
GCTGGTTTTACCTCAAGTCTATCTTCTTCGTGCACGACCGTCCGGAAGATGA  
AGCCTGTCCAGTTTGTGCCCTGCTGTGTCAGCCAGAACTGGACCTTCCACGGG  
CCAGGCGGAGCGGGCAGGCGGCGGCCAACTGGCTGGCGGGATTTCGGCCG  
AGGCCCCACCCCGCTACCTTGCTGGGCATCCGGCAAACAGCAACGCAG  
CGGGCCGAGGCGTCTGCTGGTATTGGATGAGTTCAAACAGAGAAGAGG  
ATTAGTAGGATGTTCTACATCATGACGTTTTTCTTCTCCTGGCGCTGTGGGG  
GCCCTATCTGGTCGCTGCTACTGGCGGGTGTGTTGCAAGGGGCCCTGTGG  
TCCCTGGGGGCTACTTGACGGCCGCGTGTGGATGAGCTTTGCCAGGCC  
GGGGTCA-TCCTTTCATCTGCATCTTCTCANNNNNNNNNGCCAAATCTCGCTTTCACCC  
TGGCGTGGGGACTGGTCCCTGGCACGGAGC---GCAGCGTCCCCTCGGCA  
ACAGCTTGCTGTCCCCGACGAAACCGACGATCCCCTGTTGCCACCCCC  
CCGCAGCGATGGTTTGTACCC---CTGCCAACAACCGACTGGACTTTGC  
TGCTCGGCATACGACGCGCC-----GATTTCCCGGTAACGCGG  
CCACCTTGCTGTCTTACGACGCGGCGGAGTGAAGGCTC-----TTCCC  
CTGCCGACTGCAGGCTGCTCCAACCGGCCTCTTGGCTATTACGCAGACCC  
GTCGG---GCTGG---GGAGGACGCACGCGCCGCGCAGTACTGCGGCGTGA  
ACAGCAAATCCAGCTCGGTCTTTTCTGCTGGCCCCGTAACCTCTCTCGGC



GGCCGAGCAGGTA---CC---AACTACCTGG-----CCGAGGA---  
AGGA---GACTC---CATCACGACGGAGAGGTCCCA---AT---CGGCG  
GCTCGGACGAG---ACCAAACCCAAAGACATGAC---ATCCGA---GTCG  
AGCTGGATAGAG---ACGCCGTCTCCATCAAGTCGATTGATTTCGAGCGA  
TTCTGGTATCTTTG---AACAGGCCAAACGGAGAAGAATCTCACCTTCTG  
CCACGCCG-----GTTTCAGAGACAGTGTCCCCGCTAAAAATCTGAG  
CATCACTCAACAGGCGAAGTACAGAGAGAGAAGTAGCGTTGGGGATAAA  
TCCGTTTCGCGGATGGGATGGGCGCCTTCAAATAAAACCACAGCTCCCACG  
ACATCGGCTCCGG---ACAAACGGCGTTTTCTCCAGGCG---CCCGGC  
TAC---GCGGCAGCCGCCCTGGGA---CACCATCA-----CCACCCGAC  
CCACGTTGGCTCT---TACTCCACGGCGGCTTTCAACTCCACCAGGGACT  
TTCTCTTCAGAAATCGGGGCTTCGGGGACGCCACCGG-----G  
GCGCAGCACAGTTTGTTCGCCTC-----CGGAAGTTT---C-----  
-GCAGGGCCACATGGACACTCGGATGCAGCGGGGCACCTGCTCTTCCCGG  
GGCTCCACGAG---CAGGCGGCGAGCCATGCGTCTTCCAACGTGGTCAAC  
AGCCAGATGCGGCTGGGCTTCTCGGGGGACATGTACGGACGGGCCGACCA  
GTACGGCCACGTTACGAGCCCGCGGT---CCGACCCTACGCTTCGACCC  
AGCTGCACGGCTATGGCCCCATGAACATGAATATGGCCGCA---CACCAC  
GGCGCAGGGGCTTCTTTTCGATAACATGAGGCAGCCGATCAAGCAAGAGCT  
CATCTGCAAGTGGATCGAGCCGGAGCAACTGACGAATCCCAAGAAGTCGT  
GCAACAAAACTTTTAGCACGATGCACGAGCTTGTGACCCATCTGACGGTG  
GAGCATGTGGGGGGACCGGAGCACACCAACCACATCTGCTTCTGGGAGGA  
ATGCGCCAGAGAGGGAAAGCCATTCAAAGCCAAATACAAACTTGTAATC  
ATATCAGGGTACACACCGGAGAAAAGCCCTTTCCGTGTCCGTTCCCCGGC  
TGTGGCAA

>Cromeria nilotica

AGCCTTTTAAATTCGAGCAGAAGCTCAGCCAACCCGGCTCACTTATAGGCGA  
CGACCAAATTTATAATGTAATCGTCACAGCACATGCTTTTCGTAATAATTT  
TCTTTATAGTAATGCCAATTTTAAATTGGGGGCTTTGGGAACTGGCTAATT  
CCACTTATAATTTGGGGCCCCAGATATGGCCTTTCCCCGAATAAATAATAT  
AAGTTTCTGGTTACTCCCCCGTCATTCCTTCTGCTCTTGGCTTCTCCCG  
GCGTAGAGGCAGGTGCCGGGACAGGCTGAACTGTTTATCCTCCCTTAGCA  
GGTAATCTAGCACATGCCGGGGCCTCTGTAGACCTTACAATCTTTTCGCT  
GCACCTAGCAGGTGTGTCATCTATCCTTGGTGCAATTAACCTTCAATTACCA  
CAATTATTAACATGAAACCTCCAGCAATCTCACAATACCAAACCCCTTA  
TTTGTGTGAGCCACTTTGATCACAGCAGTACTTCTTCTGCTTTCCCTTCC  
AGTGTAGCTGCCGGGATTACAATGCTACTTACAGACCGAAATATTAACA  
CCACATTCCTTCGACCCCGCTGGAGGTGGTGATCCCATCCTATAACCAGCAC  
TTGTCTGATTCTTTGGCCACCCAGAAGTATATATTTAATCCTGCCAGG  
CTTCGGTATAATTTCTCATATCGTTGCATACTATGCGGGCAAAAAGAGC  
CCTTCGGGTACATAGGGATAGTATGGGCCATGATAGCAATCGGACTTCTG  
GGGTTCAATTGTCTGAGCCCATCATATGTTACCCGTAGGCATGGACGTAGA  
CACACGGGNNNNTTCTTGAGAAAGAACTTTCACCCATCAAATGCTTAGGAATG  
TGCTTCTCTGTGATGCCCATCAATGCACACAGCTCTTCCAGCTTCTCCTG  
GAACATGTGCCTGAGTAACTTTCCAGCTATCTGCAAGACCGAGGAGTTCC  
TACAGCTTCCCAAAGACATGCTTGTCCAGCTCCTGTCCCATGAGGAACTG  
GAGACAGAGGACGAGCGGCTTGTATACGAGTCAGCACTCAACTGGGTCAA  
CTATGATCTGGAACGTAGACACTGCCACTTGCCAGAGCTGCTGCGTACGG  
TTCGGCTAGCTCTGCTTCCC GCCATCTTCTTGATGGAAAACGTTTCAACA  
GAGGAACTGATAAATGCACAAGCCAAAAGTAAAGAGCTGGTGGACGAAGC  
GATTCGCTGTAAGCTGCGCATTTTGCAAAACGATGGAGTGGTAAACAGTC  
CCTGTGCCCGTCTTCGAAAACCTAGCCATGCACTCTTTTTATTGGGTGGT  
CCCACCTTCATGTGCGATAAGCTGTACCTGGTGGACCAGAAGGCCAAAGA

AATCATTCCTAAGGCTGACATCCCTAGCCACGCAAAGAATTCAGTGCCT  
GTGCTATTGGCTGTAAAGTGTATGTGACGGGTGGGC--GTGGCTC-TGAA  
AATGGTGTGTCTAAGGACGTGTGGGTGTATGACACACTGCATGAGGAATG  
GTCTAAAGCAGCACCAATGTTAATAGCACGATTCGGCCATGGATCGGCAG  
AGTTGCGGCATTGCCGTGTATGTGGTGGTGGTCACACAGCNNNNNNNNNNNNNNNNNNNNNNNNNNNNNNNNNN  
NGGATGATTAC  
ATTGTCGTTTTTAGTCGTTCTAACCAACAGGTTGATCTTTAATGAACCAGA  
ATTGATTCTAGCTCTTGCTCAAGAATTCCAAATGAGAACCGTCACTGTAT  
CCCTGGATGAACAGTCATTTCCAAACATTGTCCAGATCATTAGTGGAGCG  
TCAATGTTGGTCAGCATGCATGGAGCTCAATTGGTTACCTCCATGTTTCT  
CCCTCGAGGTGCAGTTGTGATTGAACTCTTCCCCTTTGGAGTTAAACCAG  
ATCAGTACACACCATACAAACCTTTGCCTCCTTGCCTGGAATGGACCTC  
CAATACGTTGCATGGAGAAACACAATAGAGGAGAAATTCGATAGCCTACCC  
TGACCGTCCCTGGGATCAGGGTGGCATCGCTCACTTGGACAAGGAGGAAC  
AGGACCGCATAATTGCCAGCAAGGAGGTACCACGTCACCTTGTGTTGTGCG  
AACCCAGAGTGGCTATACCGCATCTATCAAGACACGATTGTGGACATTCC  
CACCTTTATGGAGGTAGTTTCG---GGAAGGTCTTAAG---GCCAAATTAA  
ATTTGAAAAA---GACCAAGGCCGCCAGCACAGTGCACCCTGGCCGCGTT  
CGAGATCCCAAATGCCAGACTTCTGTGCAGGCGACCAGTGAAGCCAAGTT  
GACTGTGTCTTGGCAGATTCCTTGGAACCTCAAATACCTGAAAAGTTCGGG  
AAGTCAAATACGAAGTGTGGATACAAAAAAGGATGCTAGCAAAGGGACA  
CTGGAAGATCAAATTATTCAGGCTAACCTTGCCTGGAGGCTTTTGGCAA  
TGCCAAAACAGTAAGAAATGACAATTCCTCCCGCTTTGGAAAGTTCATT  
GCATTCATTTTGGAACAAGTGGTAAACTAGCTTCTGCTGACATAGAGACT  
TACCTACTTGAAGAAGTCTCGTGTAACCTTTCAATTAAAATCTGAAAGGAA  
CTACCACATCTTTTTTCAGATATTTGCTGCTGAAAAGCCAGAGTTGTTGG  
ATATGTTATTGATTACCAACAATCCTTATGATTACTCTTACATTTCCCAA  
GGAGAAGTAACAGTCGCATCCATCAATGACAACGAAGAAGTCTTGCTAC  
TGACAATGCTTTTGTATGTTCTTGGTTTTACAGCAGATGAAAAGATGGGTG  
TCTACAAGTTGACGGGTGCAATAATGCACTACGGCAACATGAAATTCAG  
CAGAAGCAGCGAGAGGAGCAGGCAGAGCCTGATGGAAGTCTGAGTCTGCAGA  
CAAGTCAGCCTACCTAATGGGGCTAAACTCAGCAGATCTCCTAAAGGGAC  
TCTGCCATCCGAGAGTTAAAGTAGGCAATGAGTATGTTACAAAAGGACAG  
AATGTGGATCAAGTCTACTACCCCAACAAGAGGCCTTTAAGTGTGAAGA  
GTGTGGTAAGCACTACAACACCAAGCTAGGTTACAAGCGCCACGTAGCCA  
TGCCTCTGCTACAGCCGGTGATTTGACTTGAAGGTGTGCCTGCAGAGC  
TATGAGAGTACTCCAGCTCTTTTAGAGCACTTGAAGAGTCAATTCAGGCAA  
ATCATCAGGGAGCACCAAGGAGAAGAAGCATCCATGTGACCACTGTGATC  
GGCGTCTTACACGCGTAAAGACGTACGCCGTCACATGGTTCGTGCACACA  
GGTCGCAAGGACTTCCTGTGCCAGTACTGTGCACAACGTTTTGGCCGCAA  
AGATCACCTGACACGGCATGTCAAGAAGAGCCACTCACAGGAGTTACTGA  
AGATCAAGACAGAACCCTCCGGACATGTTAAGCCTGTTGGGGTCTGGATCT  
CCACCCTGTGCTGTGAAGGAAGAACTCAGCCCAATGATGTCAGGCATGGG  
GCCTGCCAAGGACCCCTGATGGCTAAGCCTTTTCCCACAGGAACCCCTT  
TTCCCATGGGTATGTATAACCCCAACCAC-----ATCCAGGCCATGTCT  
AATCCCGGTGTGGGTCAC-----CACCACACCTTGGTACCTGGCTC  
TCTGTCTGCTGCTATGGGGATGGGCTGTCATATGGAATATTTAATTTATG  
CTTCTTTTTCTTCATGGGATGTTTACAAATTAGTGTGGTTCCAACATT  
GTGAACCTACTTGGCTAGCAACTCTCCTAGTGTATCATTGTCTCTGACGCA  
GCAGAAGTACTTTCAGTAACTACAGTCCAGTTATTGGGTTCTACATTTATG  
AGCCCATGAGTATTGGAACACTACTGTGCAGGAACACCTTAAAGACGTTA  
GGACATGGTTTTCAACAAGATTTTCGTGGATTGATAATTACTTTTATTACCT  
TAAAGTGGTGAATGTCAGTGCATCAACCAAAAGTGATTTTATAAACATCC

TCAAGAATTCGTTCTTGAGGAGTCTGAGTATCAACACTTCATGGAGGAC  
ATTATTTTCTCCAAAA---ATGGAG-----ATGAGTATGACAT  
TATTGTGTCCCGGATGTACTTGGTCGCCAGAACCACGGAGAAGACCCGAG  
AGGAGGTTGTGGAGCTGCTGGAGAGGTTAAGACCTCTGTCCCTAATAAAC  
AGCATCAAATTTATTGTCTTTAACCTACCTTCGTCTTCATGGACCGTA  
CAGTCTTCRGTCATTTACCTATACTGACGTCAGGCTTTAGYGTTTTGA  
CCGTCATTATTCTTACGTTCTTCTAGTCATTAATCCACTGGGGAAC TTC  
TGGTTGATACTAACCGTCACTTCTGTGGAGTTAGGGGTTCTGGGTCAT  
GNNNNNNNNNNNNNNNNNNNNNNNNNNNNNNNNNNNNNNNNNNNNNNNNNNNNNNNNNNNNNNNNNNNNNNNNNNNNNNNNNNNNNNNNNNNNNNNNNNNN  
NNNNNNNNNNNNNNNNNNNNNNNNNNNTGGATGATTCCTGCAGACACCATCGCTCGGCGTTTTCGCT  
ATGATGT

TGCCCTGGTTTTCAGCTTTGAAAGACTTGGAAGAGGACATTATAGAGGGGC  
TAAGGGAGAGAAGGCTGGATGACAGCCTCTGCACCTCTGGTTTTAGTGTG  
GTTATCAAAGAATCATGTGATGGTATGGGAGATGTTAGTGAAAAACATGG  
AGGTGGTCCATCAGTTCCTGAAAAAGCAGTAAGATATTCCTTCACTGTGA  
TGCTATTTTCTGTTCAAGCTGAAGGGGAAGAT-----  
-----GAGGCAGTCTCTATTTTCCAGGAAATGAAGCCCAACTC  
TGAGCTATCTTGCAGACCTCTGTGTCTCATGTTTGGTTGACGAATCAGACC  
ACGAAACGCTCACGGCTATCCTGGGGCCTGTAGTGGCTGAACGTAAGGCC  
ATTAAGAGAGTGCCTCATTCTGTCAATTGGAGGGATGCCCGATCTTT  
TCGATTTCACTTCGGGGCCTGGATATGATGAAAAAATGGTCAGAGATA  
TGGAGGGCTAGAGGCATCAGGTTCCACCTATGTCTGCACACTTTGTGAC  
TCTACCCGAGCAGAGCCTCTCAAACATGGTGCTGCATTCCATCACTCG  
AAGCCATGAAGAGAACCCTGAACGATACGAAATCTGGAGAACAATCCAT  
TTTCTGAGTCTGCAGATGAACTCAGAGATCGGGTAAAAGGTGATCAGCC  
AAGCCTTTTTATGGAGACTCAGCCAAGTTTGGATGCTTTGCACTGTGACAT  
TGGTAATGCCACTGAGTTCTACAAGATCTTTTCCAGGATGAAATTGGTGAAG  
TACACCTGAAAAA---TAAC---CCAGGACGTGAAGAACGTCGTCGCTGG  
CGCTCAGCTCTAGACAAACAGCTGAGGAAAAAATTGAACTGAAACCAGT  
AATGAGAATGAATGGTAATTACGCAAGACGTCTAATGACCCTAGAGGCAA  
TAGATGCTATTTGTGAGCTTTGTGCCATCTGAGGAACGTCGCAAGGCTTTG  
AGGGAACTTATGGAACTTTACATCCAGATGAAACCAGTGTGGCGCTCAAC  
ATGCCAGCACGTTGAATGCCCGGATCAACTGTGCCGCTATAGTTATAACT  
CTCAACGCTTTGCTGAGCTTCTGTCTCCACATTCAAATACCGATATGAT  
GGCAAATTAACCAACTATCTTACATAAGACCCTGGCTCATGTTCTTGAGAT  
TGTTGAGAGGGATGGATCTATCGGTGCATGGGCAAGTGAAGGGAATGAAT  
CTGGAAACAAGNNNNNNNNNNNNNNNNNNNNNNNCCAGGACCTCAGTGGAAAGGAGAACCCCAAGCCTTT  
TAAT

TGTTCCATTGAAGATCCTACCAAACAACCAAGTTCAAGGGTATAAAGAC  
GTACATATCATAACCGCTGACCCCCAGCCACACTGGTCGCCCTGTGTATC  
GTCGTTACAAGCACTTTGATTGGCTGTATAATAGGCTACTGCACAAGTTC  
ACTGTTATCTCAGTGCCTCATTTACC TGAGAAGCAAGCAACTGGCCGCTT  
TGAGGAGGACTTTATTGAGAAGCGCAAGAGACGCCATTTTATGGATGG  
ACCACATGACCAGTACCCCTGTTTATCACAATATGAGGGCTTTGAACAT  
TTTCTGATGTGTGCTGATGATAAGCAGTGGAAACTTGGGAAACGAAGAGC  
GGAKAAGGATGAGATGGTAGGAGCGCACTTTATGCTCACTTTACAGATTC  
CCAATGAGCACCAGGACTTG CAGGATGT CGAAGAACGAGTGGACTCTTTT  
AAGGCCTTTGCAAAAAGATGGATGACAGTGTCA TG CAGTTGACCCATGT  
GGCTCTGAGCTGGTACGTAAGCACCTGGGGGGCTCCGAAAGGAGTTTC  
AGAGACTGGGTAATGCATCCAATCTATCAGT CAGGCCTTCATGCTGGAT  
CCACCTTATTGCTCAGATGCTT WAAAACATGCCATCACTCACNNNNNNNNNNNNNTTCCTCAA  
ACTGACGTCTTTGGGTTTTATCATTTGGTGTGGAGTGGTCGGTAATCTCC  
TGATCTCCATCCTTCTCGTTAAAGACAAAAGCTTGCACCGTGCCCCCTAC

TATTTCCTTTTGGACCTGTGCGCCTCTGACATCCTTCGTTTCAGCAATCTG  
TTTCCCCTTTGTGTTTACTTTCAGTCAAAAATGGCTCAGCATGGTCATATG  
GCACACTTACCTGCAAAGTGATTGCCCTCCTGGGTGTTCTATCGTGTTC  
CACACCGCCTTTATGCTTTTTCTGTGTCAGTGTTACGCGGTACCTGGCCAT  
CGCCATCACCGCTTCTATAACCAAGAGGCTCACCTTCTGGACTTGCCTGG  
CTGTTATCTGTATGGTGTGGACGTTRTCAGTCGCCATGGCATTCCCACCA  
GTGTTAGATGTGGGCACATATTCGTTTCATCCGTGAAGAAGACCAGTGTAC  
ATTTACAGCACCGCTCTTTCCGTGCCAACGATTCTCTGGGCTTCATGTTAC  
TCCTTGCCCTCATTCTCCTGGCTACCCAGCTTGTCTACCTCAAGCTCATC  
TTCTTTGTCCATGATCGTCGAAAAATGAAGCCTGTCCAGTTCGTTCCAGC  
CGTTAGCCAGAACTGGACCTTCCATGGCCWGGAGCCAGTGGCCAGGCAG  
CAGCTAATTGGCTGGCTGGATTTGGCCGTGGTCCCACCCACCCACACTA  
CTGGGGATAAGGCAGAACAGCAACGCGGCAGGCCGAGAAGACTGCTGGT  
GTTGGATGAGTTTAAAGACTGAAAAGAGGATTAGCAGGATGTTCTACATTA  
TGACCTTCTTTTTCTTAGCTTGTGGGGACCCTACCTGGTGGCTTGCTAC  
TGGAGAGTGTGGCAGGGGTCCAGTTGTCCCTGGGGGTTACCTGACAGC  
CGCTGTGTGGATGAGCTTTGCCAGGCTGGAGTCAACCCCTTCATTTGCA  
TCNNNNNNNNNNNNNNNGCCAAATCCCGCTTTCACCCTGGCGTCGGGAGCGGTCTGGCACGGAC  
C---GCAGCGTCCCACTCAGTAAACAGCTTGTATCACCGCAACAAACCGA  
GGAGACCGCTGTGG---CCTCCCCGAGCGATGGTTTGTACCC---CTG  
CCAACAACCGACTGGACTTTTGCCGCGTCAGCTTACGACGCCGCTGCGGCT  
GCTGATTTCCCGGTAACGCTGCGACCCTTCTGTTCGTATGCGGCTGCTGG  
AGTAAAAGCGC-----TTCCATTGCCACCGCAGGCTGCTCCAACAGGC  
CATTAGGTTACTATGGAGACCCGCCG---GTTGG---GGCACGCGTACT  
CCTCCTCAGTATTGC-----AGTAAATCTAGCGCAGTTCGCGGTG  
TTGGCCGTCCAACCTGTGGGTAGTAGAACGACCA---CTACCGTTATC  
TGA---CCGGCTTGGAGGATGGTGGT---GACCC---CATAGCGCCTGAA  
AGATCCCCT---CT---CGGCGGAGCAGAGGAA---ACCAAGCCGAAAGA  
CCT-----TACGGA---ATCCAGCTGGATAGAG---ACACCGTCTCTA  
TCAAGTCCATTGATTCAAGCGATTCTGGAATTTTTG---AACAAAGCCAAA  
CGGAGGAGGATTTCCGCATCTGCCACACCA-----GTTTCAGAGAC  
CTCCTCTCCTTTAAAATCTGAA-----ACAGGCGACGTTACAGACA  
GAGAAGTGGCTTTGGGGATAAATCCGTTTCGCCGACGGCATGGGTGCTTTC  
AAAATTAACCACAGCTCCCACGATCTTGGCTCTGG---GCAAACGGCGTT  
TTCTCACAGGCT---CCCGGCTATGCAGCCGCTGCTGCCCTGGGACATC  
ACCATCA-----TCACCCTACTCATGTCAGTTCC---TACTCCACGGCG  
GCTTCAACTCAACACGGGACTTCTTTTTTCGGAATCGGGGGTTTGGAGA  
CGCCACCAG-----CGCGCAACACAGTCTTTTTGCTTCTGC--  
-CGCGGGAAGTTTTGCT-----GCAGGGCCACATGGACATTTCAGATGCC  
GCGGGGCACCTGCTCTTTCCGGGATTGCACGAGGCTCAGGCGGCGACACA  
TGCTTCCCTCAAACGTGGTGAATGGTCAAATGCGCCTGGGCTTTTCCGGGG  
ACATGTATGGCAGGGCTGACCAATACGGCCACGTTACGAGCCCTAGGT--  
-CCGAGCATTACGCGTCGACTCAGTTGCATGGCTATGGCCCTATGAACAT  
GAACATGGCTGCC---CATCACGGCGCCGGGGCCTTCTTTCGATACATGA  
GACAGCCCATCAAACAAGAGCTCATCTGCAAGTGGTTCGAGCCCAGCAG  
CTTACGAATCCAAAAAGTCTGTAAACAAAATTTACAGCACCATGCATGA  
GCTGGTTACCCATCTCACGGTGGAAACACGTTGGGGGACCCGAACAATCCA  
ATCACATTTGCTTTTGGGAAGAGTGTGCCCGGGAAGGAAAACCTTTTAAA  
GCCAAGTACAACTTGTAATCATATCAGAGTCCACACCGGAGAAAAGCC  
TTTTCTTGCCCATTTCCGGNNNNNNNNNN  
>Cryptopsaras couesi  
AGCCTATTGATCCGTGCTGAGCTCAGCCAGCCAGGCACACTTTTAGATAA  
CGACCAGATCTACAACGTTGTTGTAACAGCGCATGCCTTTGTAATAATTT

TTTTTATGGTTATAACCAATTATGATTGGAGGCTTTGGGAATTGGCTAATT  
 CCTTTAATGATCGGAGCGCTGATATAGCGTTCCCTCGAATAAATAACAT  
 AAGCTTCTGGTACTTCCCCCTTCTTCTTTCTCCTGCTGGCCTCTCAG  
 GCATTGAAGGGGGCGCAGGAACAGGGTGAACAGTATACCCGCCCCTCGCA  
 GGTAAC TTGGCGCACGCTGGGGCATCTGTAGACCTAACAATTTTCTCTCT  
 ACACCTGGCAGGTGTGTCCTCAATTTTAGGGGCTATCAACTTTATCACAA  
 CAATTATTAATATAAAAACCTCCCGCCATGTCACAGTACCAGACACCTTGT  
 TTCGTATGGTCCGTGTTAATTACGGCCGTATTACTTTTACTCTCACTACC  
 CGTTCTTGCGGCTGGTATCACCATGCTACTAACAGACCGTAACCTAAATA  
 CAACATTTT-----  
 -----  
 -----  
 -----

-----NNNNNNNGAGAAACCTTACCCGWCTAACTGCCTTGGCATGCTGT

TGCTGTCTGATGCCACCAGTGCACCAAGCTGTCAGAGCTCTCTTGGGGC  
 ATGTGCCCTCAGCAACTTCCCCTACTATTTGCAAGACAGAGGACTTCCCTCCA  
 ACTACCCAAAGATATGGTGGTGCAGCTTTTTGTACATGAAGAGCTGGAGA  
 CAGAAGATGAGAGACTGGTTTATGAAGCTGCCCTGAACTGGATCAACTAT  
 GACCTAGAAAAGGAGGCCTGTCACCTTCCAGAGCTCCTGAGAACGGTCCG  
 TCTTGCCCTGCTGCCCTGCCATCTTTCTAATGGAGAATGTCTCGACAGAAG  
 AGCTGATCAATGCCAGGCCAAGAGCAAGGAGCTGGTGGATGAGGCTATC  
 CGCTGTAAGCTGAAGATCCTGCAGAATGACGGCGTCGTTAACAGCCCGTG  
 TGCTCGACCAAGAAAAACCAGCCATGCTCTTTTTTCTCCTGGGAGGGCAGA  
 CTTTCATGTGTGACAAGTTATACCTGGTGGATCAGAAGGCCAAAGAGATC  
 ATCCCAAAGGCAGACATTTCCAGCCCCAGGAAAGAGTTCAGCGCCTGTGC  
 CATCGGCTGTAAGGTGTACATCACAGGTGGGA--GAGGCTC-CGAGAATG  
 GCGTGTCCAAAGATGTATGGGTCTATGACACCGTCCATGAGGAATGGTCC  
 AAAGCGGCGCCCCCTGCTCATTGCCAGGTTTTGGTCAATGGCTCTGCTGAGCT  
 GAAACACTGCCTCTATGTCGTAGGAGNNNNNNNNNNNNNNNNNNNNNNNNNNNNNNNNNNNNNNNNNNNNNNNNNNNNNNNNNGGA  
 TGAATACATTGTTGTGTTTAG

TCGTTCAACAACAAGACTAATACTGAATGAAGCGGAGCTAATAATGGCAC  
 TGGCTCAGGAGTTCCAGATGAGAGTGGTACAGTATCCCTGGAGAACAG  
 TCGTTCCCTAGTATCATCCAGGTGATCAGCAGTGCTACCATGTTAGTCAG  
 TATGCATGGAGCTCAACTTATCACCTCACTTTCCCTCCCAGAGGAGCTG  
 TTGTGGTGGAGCTTTTCCCCTTTGCTGTGAACCCAGAGCAGTACACCCCA  
 TATAAAACCCCTTGCCCTCCCTTCCGGGCATGGACCTGCATTATATCTCCTG  
 GAGGAAC TTAAGGAGGATAACACCATCACCCACCCAGACAGGCCCTGGG  
 AACAAAGGGGGTATTGCTCATTTGGATAAGGAGGAGCAAGAACGAATACTA  
 ATGAGTAAAGATGTGCCAGGCATCTGTGCTGCCGAAACCCAGAGTGGCT  
 CTTCCGGATCTATCAGGATACATTGGTGGACATTCCCTCCTTCTCCTGGAAG  
 TCCTCAA--AGAGGACATGAAG--ACTAAGCCCAACTTGAAGAA--G  
 TCAAAGCCGGCCAGCAACCTCCACCCGGGCCGGGTGAGAGRACCTCAGTG  
 TCAGACTTCAGTTCAAACCAGTAATGAGGCTAACTCACAGTGTCCGGC  
 AGATAACCGTGGAACTGAAATACCTGAAGGTGAGGAGGTCAAATATGAG  
 GTG-----  
 -----  
 -----  
 -----  
 -----  
 -----  
 -----









GCAGAGCTGAAACACTGCCTGTACGTGGTAGGAGGTCACACCGCAGCAAC  
TGGCTGCCTCCCTGCTTCTCCATCCGGATGAATACATTGTTGTGTTTCAGT  
CGTTCAACAACAAGGCTGATACTGAACGAAGCCGAGCTAATCATGGCACT  
GGCCAGGAGTTCCAGATGAGAGTGGTCACAGTTACCCTAGAGGAACAAT  
CTTTCCCCAGTATTGTCCAGGTGATCAGTGGTGCATCCATGTTAGTCAGC  
ATGCATGGAGCTCAGCTTATCACCTCACTCTTCCCTCCCCAGAGGAGCTAC  
TGTGGTGGAGCTGTTCCCCTTTGCTGTGAACTCAGAGCAGTACACCCCAT  
ATAAAAACCCTTGCCTCGCTTCCAGGCATGGACCTTCATTATATTTCCCTGG  
AGGAACACTCAGGAGGAGAACACTGTCACCCATCCAGACAGACCCCTGGGA  
ACAAGGAGGCATCACTCACTTGGAGAAGGAGGAGCAGGAGCGAATACTGA  
CCAGCAAAGACGTCCCCAGGCACCTGTGCTGCCGCAACCCGGAGTGGCTC  
TTCCGAATTTACCAGGACACTTTGGTAGACATCCCTTCCTTCCCTGGAAGC  
CCTCAA---GGAAGGAATGAAG---ACCAAGCCAGCTTGAAGAA---GT  
CCAAACCAGCCAGTGCAGTCCATCCGGGCCGGGTCAGAGAAGCCAGTGT  
CAGACCTCAGTACAAACCACCAATGAGGCTAAACTCACAGTCTCCTGGCA  
GATCCCATGGAATTTGAAATACCTGAAAGTAAGAGAGGTGAAGTACGAGG  
TGTGGATCCAGAAAAGAGATACCAGCAAGGGAACCTCTGGAGGATCAAATC  
ATCCAGGCGAACC CGCGCTGGAGGCCTTTGGAAAATGCCAAAACGCTGAG  
AAATGACAACCTCATCCCGTTTTTGGAAAATTCATTTCGAATTCACTTCGGAA  
ACAGTGGCAAGCTGTCATCTGCTGACATCGAGACATACCTGCTGGAGAAG  
TCTCGTGTACCTTTCAGCTCAAGGCTGAGAGGGACTACCACATCTTCTA  
TCAGATCCTGTCCAATCAGAAGCCAGAGCTGCTGGACATGCTTTTAATCA  
CCAACAACCCGTACGACTACTCCTACATCTCCCAAGGAGAGGTAACGGTC  
GCCTCCATCAATGACTCGGAGGAGCTGATGGCCACTGACAGCGCCTTTGA  
TGTGCTCGGCTTCACTCCGGAGGAGAAGATGGGCGTCTATAAACTGACTG  
GCGCCATCATGCACTACGGCAACATGAAGTTCAAGCAGAAGCAGCGTGAG  
GAGCAGGCCGAGCCTGACGGGACGGAGGCTGCTGATAAATCAGCTTACTT  
GATGGGGCTGAACTCTGCTGACCTCATCAAAGGGCTGTGCCATCCCAGAG  
TCAAGGTAGGAAATGAGTATGTTACCAAAGGCCAGAGTGTGGACCAAGTC  
AACTACCCCAACAAGGAGGCCTTCAAGTGTGAGGAGTGTGGGAAGCACTA  
CAACACCAAGCTGGGATATAAGCGCCATGTGGCCATGCACTCTGCCACGG  
CAGGGGATCTCACCTGTAAAGTGTGCATGCAGAGCTACGAGAGCACACCT  
GTTCTCCTGGAGCACCTCAAGAGCCACTCGGGGAAGTCCTCGGGCGGAGC  
AAAGGAGAAAAAGCACCCATGTGACCACTGCGACCGCGTTTTCTACACAC  
GGAAGGATGTGAGACGGCACATGGTGGTCCACACGGGCCGAAAGGACTTC  
CTGTGCCAGTACTGTGCCAGCGCTTTGGCAGGAAGGATCACCTGACCCG  
CCACGTGAAGAAGAGCCACTCACAGGAGCTGCTGAAGATCAAGACGGAGC  
CTCCTGATATGTTAGGTCTTTTAGCTTCGGGGTCACCNCCTTGCTCTGTGA  
AGGAGGAGCTTAGCCCCATGATGTGCGGCATGGGTCCCAACAAAGACCCC  
ATGATGGGCAAACCGTTCCCCAGTGGCGCCCCTTTCCGATGGGCATGTA  
CAACCCCAACCAC-----CTTCAGGCMATGTCTAATTCTGGGGTGGGTC  
ATCCA-----CACCCGTCCCTGATGCCAGCTCGCTGTCTGCAGCTATG  
GGCATGGGCTGTACATGGAATATCTCATCTACGCCTCTTTTTTCATTCAT  
GGGATGTTTACAAATCAGTGTGATGGATCAAACATTGTGAACCTGCTGGCTA  
GTAACTCTCCAAGTGTTCGTATGCTGTGACCCAGCAGAAATACTTCAGC  
AACTACAGTCCCGTGATTGGGTTCTACATTTACGAGCCATTGAGTAYTG  
GAACTCCACGGTGCAGGAGCACTTGAAGACTCTGAGTACCGGTTTCAACA  
AGATCTCCTGGATGGACAACCTTTTCCACTACCTGCGGGTGGTGAATGTG  
AGTGCCTCGACAAAAGCGACTTCATCACCATCCTCAAGGGCTCCTTCCT  
GCGCAGCCCGGAGTACCAGCACTTCACTGAGGACATCATATTTCTCCAAGA  
---ACCGTGACACTG-----ACGAATACGACATTATCGCCTCACGCATG  
TATTTGGTGGCACGGACCACAGAGAAGAGGGGGGAGGAAGTGGTGGAGCT  
TCTAGAGAAGCTTCGCCCGTTGATGCTGATCAACAGCATCAAGTTCATTG

CCTTCAATCCCACGTTTGTGTTTCATGGACCGCTACAGCTCCTCCGTCATC  
TCGCCATCCTTACCTCAGGCTTCAGCGTGCTCACCATCCTCATCCTCAC  
TTTCTTCCTGGTCATCAACCCCTTGGGGAACCTTCTGGCTCATCCTCACGG  
TTACGTCCGTGGAGCTGGGCGTCTGGGTTTGTATGGGTTTTCAACAGTTT  
GAGTGGCAGCCAGCTCTCAAGAATGTGTCTACATCTTGTAATGTTGGCAT  
TATTAATGGGCTCTCTGGATGGAGTTCTTCAGTGGATGACTCCCCAGCTG  
ACACCATCACTCGGCGGTTTTCGTTATGATGTGGCACTAGTGTGAGCATT  
AAGGATCTGGAGGAGGACATGATGGAGGGGCTGAGAGAGAGTGGGATGGA  
AGACAGTGCTTGCACATCAGGCTTCAGTGTATGATCAAGGAATCGTGTG  
ACGGCATGGGCGATGTCAGCGAAAAGCATGGTGGAGGACCAGTTGTTCCCT  
GAGAAGGCTGTACGTTTCTCTATCACTATTATGTCTGTCTCTGTCCCTGGC  
AGATGATGAGGAG-----GAGGCGG  
TTACTATCTTACGGAGCCAAAGCCAAACTCAGAACTGTCCTGTAAGCCC  
CTTGGCCTGATGTTTGTGGATGAATCAGACCATGAAACACTCACAGCTCT  
CCTGGGGCCTATAGTTGCAGAGCGTAATGCAATGAAAGAGAGCAGGCTCA  
TCCTTTCCATCGGTGGCCTGCCTCGCTCCTTCCGCTTCCACTTCAGAGGC  
ACGGGATACGATGAGAAGATGGTGCAGAGATGGAGGGCATGGAGGCCTC  
AGGGTCCAGCTATGTCTGCACGCTGTGTGATTCCAGTCGGGCAGAGGCAT  
CTCAAAACATGGTGTACTACTCCATCACCCTGTAACCATGAAGAGAACCCTT  
GAACGTTACGAAATATGGAGAACCAACCCTTTTTCTGAATCTGGAGAAGA  
GCTGCGGGAGAGAGTCAAAGGGGTGTCTGCCAAGCCCTTCATGGAGACTC  
AGCCACGATGGATGCATTACATTGCGACATTGGCAATGCCACTGAGTTC  
TACAAAATCTTCCAGGATGAAATTGGGGAGGTGTACCAAAGGT---CAA  
T---CCCAGCCGGGAGGAACGGCGTAGCTGGAGGGCAGCCCTAGATAAAC  
AGCTGAGGAAGAAGCTGAAGCTTAAACCGTAATGAGGATGAATGGGAAC  
TATGCCCGCAGGCTAATGACCCAGGAGGCTGTGGAGGTGGTGTGTGAGCT  
GGTGCCTCAGAAGAGAGGAGGGAGCCCTGAGGGAGCTTATGAGGCTAT  
ACCTCCAGATGAAGCCTGTGTGGCGTGCCACCTGCCAGCCAAGGAATGC  
CCTGACCAGTTGTGCCGCTATAGCTTTAACTCCCAGAGCTTTGCCGACCT  
TCTCTCGTCTACCTTCAAATATAGGTACAATGGAAAGATAACCAATTACC  
TGCACAAGACCCTGGCCCATGTCCCTGAAATCATAGAGAGAGATGGATCG  
ATCGGAGCCTGGGCCAGCGAGGNNNNNNNNNNNNNNNNNNNNNTCATAACCATCGACATGGGTCCCCTTG  
GGCCTCGGTGGAAGGAGAGCCCGCAGCCTTTCTCCTGCTCTGTTGAAGAC  
CCCACGAAACAGACAAAGTTCAAAGGCATTAAGACGTACATTTTCGTACCG  
GGTCACTCCGAGCCACACGGGGCATCCCCTTACAGGGCGCTACAAACACT  
TTGACTGGCTGTACAACCGCCTACTGCACAAGTTCACTGTGATCTCCGTG  
CCTCACCTACCTGAGAAGCAGGCCACGGGGCGATTTGAGGAAGACTTTAT  
TGAGAAGCGKAAGAGACGACTGATACTGTGGATGAACCACATGACCAGTC  
ACCCTGTGCTCTCCAGTACGAAGGCTTTGAACACTTTCTGATGTGTGCC  
GACGACAAGCAATGGAAGCTGGGCAAGAGACGAGCTGAGAAGGACGAGAT  
GGTGGGCGCCCATTTTCATGCTGACCCCTCAGATCCCTAACGAGCACCAGG  
ACCTTCAGGATGTAGAGGAAAGAGTCGACACCTTCAAGGCCTTTGCTAAG  
AAAATGGACGACAGCGTCATGCAGCTCACACATGTTGCCTCGGAGCTGGT  
GCGTAAACACCTGGGTGGATTACAGGAAGGAGTTCCAGCGGCTGGGAAATT  
CCTTCCAGTCTATTAGCCAGGCATTCATGCTGGACCCCTCCCATAGCTCA  
GACACCCTCAACAACGCCATCTCCATNNNNNNNNNNNNNNNNNNNNNNNNNNNNNTGGGTTCATCA  
TTGGAGTCGGT  
GTGGTCGAAACCTCCTGATCTCCATCCTGCTGGTCAAAGACAAGAGCCT  
GCACCGAGCGCCCTACTATTTCCCTGCTGGACCTGTGCGCCTCCGATATCC  
TTCGCTCTGCCATCTGCTTCCCCTTCGTCTTCACTCGGTCAAGAATGGA  
TCTGCCCTGGACCTATGGCACGCTGACCTGCAAAGTGATCGCCTTCTTGGG  
TGTGCTCTCCTGTTTCCACACGGCATTCATGCTATTCTGCGTGAGCGTCA  
CCCGCTACCTGGCCATCGCACATCACCGTTTCTACACCAAGAGGCTGACC

TTCTGGACCTGTCTGGCCGTCATCTGCATGGTGTGGACGTTGTCAGTGGC  
TATGGCGTTCCCGCCCGTCTAGACGTAGGGACGTACTCTTTTATCCGYG  
AGGAGGACCAGTGCACATTCCAGCACCGCTCCTTCAGGGCGAATGATTTCG  
CTGGGCTTCATGCTCCTGCTGGCGCTCATTCTCCTGGCCACACAGCTGGT  
TTACCTCAAGCTCATCTTCTTTGTCCACGACCGTCGAAAGATGAAGCCCG  
TCCAGTTCGTGCCTGCTGTCAGCCAGAAGTGGACCTTCCACGGGCCAGGC  
GCCAGCGGGCAAGCGGCGGCAACTGGCTGGCCGGATTTGGTAGAGGCC  
CACCCCGCTACTTTGCTAGGCATMCGGCAGAACAGCAACGCAGCGGGCC  
GCAGGCGTCTACTGGTATTGGATGAATTCAAAACAGAGAAGAGGATTAGT  
AGGATGTTCTACATCATGACGTTTTTCTTCCTGGCACTGTGGGGGCCCTA  
TCTGGTAGCCTGCTACTGGCGGGTGTTCGAGGGGCCCTGTAGTCCCGG  
GGGGCTATCTGACGGCAGCCGTGTGGATGAGCTTTCNNNNNNNNNNNNNN  
NNNNNNNNNNNNGCCAAATCTCGCT

TTCACCCTGGCGTGGGGACTGGTCTGGCACGGAGC---GCAGCGTCCCA  
CTCGGCAACAGCTTGGTATCCCCGAGCAAACCGAGGAGCCCACTGTTGC  
CACCCCGCGCAGCGATGGTTTTGTCAACC---CTGCCAACAACCGACTGG  
ACTTTGCTGCCTCGGCATACGACGCCGCT-----GATTTTCGCCGGT  
AACCGGGCCACCTTGGTGTCTTACGCAGCGGCCGGAGTGAAGGCTC----  
--TTCCCCTGCCGACCGCAGGCTGCTCCAACCGGCTCTTTGGCTATTACG  
CAGACCCGTGAG---GCTGG---GGAGGACGCACGCCGCCGAGTACTGT  
GGCGTAAATAGCAAACCAGCTCGGTGTTTTCTGCTGGCCCGCCAACTC  
TATCGGCGGAGAGCAGGCA---CC---AACTACCTGG-----CCG  
AGGA---GGGA---GACTC---CATAACCACGGAGAGGTCACCC---AT-  
--C---GGCTCTGAGGAG---ACCAAACCCAAAGACATGAC---ATCAGA  
---GTCGAGCTGGATAGAG---ACGCCGTCTCCATTAAGTCCATTGATT  
CAAGCGATTCTGGTATCTTTG---AGCAGGCCAAGAGGAGGAGAATCTCT  
CCTTCTGCCACGCCG-----GTTTCAGAGACAGTGTCCCCGTAA  
ATCTGAGNNNNNNNNNNNNNNNNNNNNNNNNNNNNNNNNNNNNNNNNNNNN  
NNNNNNNNNNNNNNNNNNNNCCACAGCTCCCACGATATTGGCTCCGG---ACAAACGGCGTTT  
TCCTCCAGGCA---CCCGGTAC---GCAGCAGCCGCCCTGGGA---CA  
CCACCA-----CCACCCGACCCAGTTGGCTCT---TACTCCACGGCGG  
CTTTCAACTCCACCAGGGACTTTCTCTTTAGAAAATCGGGGTTTCGGAGAC  
GCCGCCG-----GGCGCAGCACAGTTTGTTCGCCTC-----  
---CGGAAGTTT---C-----GCAGGGCCACATGGACTCGGATGCAG  
CGGGACACCTGCTCTTCCCGGGGCTCCACGAG---CAAGCGGCGAGCCAT  
GCGTCTTCCAACGTGGTCAACAGCCAGATGCGTCTGGGCTTCTCGGGGA  
CATGTACGGACGGGCCGACAGTACGGCCACGTTACAAGCCCGCGGT---  
CCGACCACTATGCTTCGACCCAGTGCATGGCTATGGCCCCATGAACATG  
AATATGGCCGCG---CACCACGGTGCAGGGGCCCTTCTTTCGATACATGAG  
GCAGCCGATCAAACAAGAGCTCATCTGCAAGTGGGTCGAGCCGGAGCAGC  
TGACGAATCCCAAAAAGTCGTGCAACAAAACCTTTTAGCACGATGCACGAG  
TTGGTGACCCATCTGACGGTGGAGCATGTGGGGGACCAGAGCAGACCAA  
CCACATCTGCTTCTGGGAAGAGTGTCCAGAGAAGGAAAGCCATTCAAAG  
CCAAATACAAACTGTAAATCATATCAGAGTACACACCCGGAGAAAAGCCC  
TTNNNNNNNNNNNNNNNNNNNNNNNNNNNNNNNNNNNNNNNNNNNNNNNN

>Cyclothone microdon

AGCCTGCTCATCCGAGCCGAGCTTAACCAACCCGGCGCCCTTCTGGGCGA  
CGACCAAGTGTACAACGTCAATTGTTACTGCTCACGCTTTTGTTATGATCT  
TTTTTATGGTCATGCCAATCATGATCGGCGGCTTTGGCAACTGGCTAATT  
CCTCTGATGCTCGGCGCCCCGACATGGCTTTCCACGGATAAATAACAT  
AAGCTTCTGGTTACTCCCCCTTCTTCTTCTCTCTGCTAGCCTCGGCTG  
GGGTAGAAGCAGGCACAGGCACAGGTTGAACCGTACCCCCCTCTCGCT  
AGCAACCTAGCTCACGCTGGGGCTCAGTAGACCTGACTATCTTCTCCCT



AGGCCACGTTGCCATGCACTCTGCCACGGCGGGCGACCTCACCTGTAAG  
GTGTGCCTGCAGAGCTACGAGAGCACGCCGGCGCTCCTGGAGCACCTGAA  
GAGCCACTCGGGGAAGTCGTTCGGGCGGGCGCAAGGAGAAGAAGCACCCGT  
GCGACCACTGCGACCGCCGCTTCTACACGCGCAAGGACGTGAGACGCCAC  
ATGGTGGTGCACACCGGCCGCAAGGACTTCTGTGCCAGTACTGCGCCCA  
GCGCTTCGGCAGGAAGGACCATCTGACACGGCACGTGAAGAAGAGCCACT  
CGCAGGAGCTGCTGAAGATCAAGGCGGAGCCTCCGGACATGCTGGGGCTG  
CTGGGCTCCGGCTCGCCGCCCTGCCCCGTCAAAGAGGAGCTCAGCCCCAT  
GATGTGCAGCATGGGTCCCTCCAAGGACCCCTGATGGCCAAGCCTTTCC  
CCAGCGGAACCCCTTCCCATGGGCATGTACAACCCCCACCAC-----  
CTGCAGGCCATGTCTGGCCCTGGGGGAGGGCAC-----CACCCCTC  
TCTAATGCCCGTTCTCTGTCTGCGGCTATGGGCATGGGCTGCCACATGG  
ACTACCTGATCTACGCCTCGTTCTCCTTCATGGGTTGTTTGCAGATCAGC  
GACGGCTCCAACGTGGTCAACCTGCTGGCCAGCAACTCCCCAGCGTCTC  
CTACGCGCTGACMCAGCAGAAATACTTYAGCAACTACAGCCCGGTCATCG  
GCTTCTACATCTACGAGCCCATCGAGTACTGGAACCTTACGGTGCAGGAG  
CACCTGAAGACGCTGGGCCACGGCTTCAACAAGATCTCCTGGATGGACAA  
CTATTTCCACTACYTGAAGGTGGTGAACGTGAGCGCCTCCACCAAGAGTA  
GCTTCATCGCCATCCTGCGGGGCTCCTTCCCTGAGGAGCCCGGAGTACCAG  
CACTTCACCGAGGACATCATCTTCTCCAAGA---ACGGCG-----  
--AGGAGTACGACATCATCGCCTCGCGGATGTACCTGGTGGCGCGCACCA  
CGGAGAAGACCCGCGAGGAGGTGGTGAACCTGCTGGAGCGTCTCCGGCCG  
CTCTCGCTCATCAACAGCATCAAGTTCATYGTCTTCAACVCACCTTCGT  
CTTCATGGACCGATACAGCTCCTCGGTCATCTCGCCCATCCTCACCTCAG  
GTTTCAGYGTCTCACCATCCTCATCCTCACCTTCTTCTTAGTCATCAAC  
CCCCGGGAACTTCTGGCTCATCCTGACTGTCACCTCGGTGGAGCTGGG  
CGTGCTGGGCCTGATG-----  
-----  
-----GTGTCTGGACTCAGAGATCTGGAAGAGGACA  
TCATGGAGGGGCTGAGAGAGCGCAGCCTGGAAGACAGCACCTGCACCTTG  
GGCTTCAGTGTGATGATCAAAGAGTCTTGCAGCGCATGGGGGACGTCAG  
TGAGAAACACGGCGGGCGGGCCAGCCATGCCAGAAAAGGCTGTGCGCTTCT  
CCTTCACCATCATGTCCATCTCCATCCAGGCTGAGGGGGAGAAT-----  
-----GAGGCCGTCACTGTCTTCAGGGAGTC  
CAAGCCAACTCAGAGCTGTCTGCAAGCCTTTGGTCTGATGTTTGTGG  
ATGAGTCTGACCATGAGACGCTGACGGGCGTCTTGGGCCCCTGGTGGCA  
GAGAGAAATGCCATGAAGAACAGCCGCTCATCCTGTCCCTGGGAGGCCT  
CGCCAGATCCTTCCGCTTCTTCTCAGAGGACGCGCTATGATGAGAAGA  
TGGTACGCCAGTTGGAGGGTCTGGAGGCCTCAGGCTCCACGTACATCTGC  
ACCTCTGCGACTCGACCCGTGCGGAGGCCTCTCACAACATGGTGTCCA  
CTCCATCACCCGACGCCACGAGGAGAACATGGAGCGCTACGAGATCTGGA  
GGACCAACCCCTACTCCGAGTCTGCAGATCAGCTTCGGGATCGGGTAAA  
GGTGTCTCAGCCAAACCCTTCATGGAGACCCAGGCCACTCTGGACGCTCT  
GCACTGTGACATTGGTAATGCCACTGAGTTCTACAAGATCTTTCAGGATG  
AGATTGGAGAGGTGTACCAGAGGCC---AAAC---CAAAGCACGGAGGAG  
CGCAGGAGCTGGCGGGCAGCTCTGGATAAGCAGCTCAGGCACAGGATGAA  
GCTGAGGCCGGTGATGAGGATGAACGGGAACTACGCCCGGCGGCTGATGA  
CCAGCGAGGCAATAGAGGTGGTGTGTGAGCTGGTCCCCTCGGAGCAGCGG  
CGGGAGGCCCTCAGGGAGCTGATGGCACTCTACATTCAAATGAAGCCTGT  
GTGGCGCTCCACCTGCCATCCAAAGAGTGCCCTGACCAGCTCTGTGCGCT  
ACAGCTTCAACTCCCAGAGGTTTGC-----  
-----

-----TCCTACACTATAGAAATGGGCCCCAAA  
GGCCCTCAGTGGAAAAGAGAGCCCTCAGCCTTTCTCTTGTTCTATTGAGGA  
CCCCACCAAACAGACCAAGTTCAAAGGCATCAAGACCTACATATCTTACC  
GGGTCACTCCCAGCCACACCGGGCGGCCCGTGTACCGTCGGTACAAGCAC  
TTTGACTGGCTCTACAACCGCCTGCTTCACAAGTTCAGTGCATCTCTGT  
TCCCCACCTGCCAGAGAAGCAAGCCACAGGACGCTTCGAGGAGGACTTCA  
TCGAAAAGCGCAAAAAGGCGTCTGGTCCTGTGGATGGACCACATGACCAGT  
CACCCAGTCCTCTCCAGTATGAGGGCTTTGAGCACTTCCTCATGTGCGC  
TGATGACAAACAGTGGAAGCTGGGGAAGAGGCGGGCGGAGAAAGATGAGA  
TGGTGGGGGCCCACTTCATGCTGACCTTCAGATCCCCAACGAGCACCAG  
GACCTGCAGGATGTGGAGGAGMGAGTCGACTCCTTCAAGGCTTTTGCCAA  
GAAAATGGACGACAGTGTATGCAGCTGACACACGTGACCTCTGAACTGG  
TGCGGAAACATCTAGGGGGTTTACAGGAAGGAGTTTCAGCGTCTGGGGAAC  
GCTTTCAGTCCATTAGTCAGGCCCTTACGCTGGACCCTCCTCACTGCTC  
TGACGCCCTCAACAACGGCATCTCACAC-----

-----GCCAAATCTCGCTTTCACCATGGCGTAGGGACTGG  
TCCTGGCAGCGAGC---GCGGCGTCCCCTTAGCAACAGCTTGCTATCCC  
CGCAACAACCCGAGGAGCCCCCGGTTG---CCTCCCCGAGAGATGGTTT  
GTCACCCCTGCTGCCAACAACCGACTGGACTTTGCCGCCTCGGCATACGA  
TGCTGCCGCTGCTGCAGATCTGGCCGGAACGCAGCCACTTTGCTGTCCT  
ACGCAGCAGCTGGAGTSAAGGCGCTACCGGTTCCCCTGTCCACWGCTGGA  
TGCTCCAACAGACCTCTKGGCTATTACGCAGACCCATCGG---GCTGG---  
-GGCGCACGCACTCCACCGCAATACTGC-----AGCAAGTCCAGCT  
CAGTYCTCTCTTGTTGGCCG-----GTAGGGGGCAGAACAGGCA---  
-CC---GGTTACCTGG-----AGGA---CGGG---GACAC---  
-----CGATAGATCTCCA---AT---AGGCGCACCGCCGGACGACC  
CCAAATCAAAGACTT-----GTCCGA---ATCCAGTTGGATAGAG---  
ACGCCGTCTTCAATCAAGTCAATTGATTTCGAGTGATTCTGGAATCTTTG-  
--AGCAGGCAAAGCGGAGAATAATTTCTCCTTCTGCCACACCA-----  
--GTTTCAGAGGCCATGTCACAGTTGAAATCCGAA-----ACGGGC  
G-----AAGAACGAGAGGTGGCTTTGGGGATCAACCCGTTTCGACAGCGG  
GATGGGCGCTTTCAAATCAACCACAGCTCGCACGATCTGGGAACCGG---  
-GCAACAGCGTTTTCTCCAGGCG---CCCGCTACGCAGCCGCTGCA

GCTCTTGGA---CACCACCA-----CCACCCGACACATGTCAGCTCC--  
-TACTCCACCGCGGCGTTCAACTCCACCCGGGACTTTCTCTTCAGAAATC  
GGGGTTTCGGAGACGCCACCAG-----TGCGCAGCACAGTCTG  
TTCGCTCTGC---AGCGGGAAGTTT---T-----GCTGGGCCACATGG  
ACACTCAGAT-----GGACACCTGCTCTTCCCTGGACTCCACGAG---C  
AAGCCGCCAGCCACGCGTCTCTAATGTCGTTAACAGTCAGATGCGGTTG  
GGCTTTTCGGGGGACATGTACGGTCTGGGCCGACCAGTATGGCCATGTTAC  
CAGCCCGCGAT---CCGATCACTATGCGTCAACCCAGTTGCATGGCTATG  
GCCCTATGAACATGAATATGGCCGCA---CACCACGGGGCAGGGCCCTTT  
TTCCGTTACATGAGGCAGCCGATCAAACAAGAGCTGATCTGCAAGTGGAT  
CGAACCAGAGCAACTCTCCAATCCGAAAAAGTCTGCAACAAAACTTTCA  
GCACGATGCACGAGCTGGTGACCCATCTCACAGTGGAGCATGTGGGGGGA  
CCGGAGCAGTCGAACCACATTTGCTTCTGGGAAGAGTGTGCCCGCAAGG  
AAAACCATTCAAAGCCA-----

>Cyttomimus affinis

-----  
-----  
-----  
-----  
-----  
-----  
-----  
-----  
-----  
-----  
-----  
-----  
-----  
-----  
-----  
-----  
-----

-----TTTCTAGAGCGGAACCTTCACCCATCCAATTGTCTAGG  
CATGCTGTTGTTGTTCTGATGCCACCAGTGTACCAAGCTGTCAGAGCTCT  
CATGGAGTATGTGCCTCAGCAACTTCCCTGCTATTTGCAAGACAGAGGAT  
TTTCTCCAACCTGCCAAAGACATGGTTGTGCAGCTTTTGGCCCATGAGGA  
GCTGGAGACAGAAGATGAAAGACTGGTTTACGAGGCTTCACTCAATTGGG  
TGAACATATGATCTTGAAAGACGGCACTGCCACTTGCAGAGCTGCTGAAA  
ACTGTCCGTTTTGGCACTGCTTCCCTGCCATCTTCCCTAATGGAGAATGTCTC  
CACAGAAGAGCTGATAAATACCCAGGCCAAGAGCAAGGAGCTAGTGGATG  
AGGCCATTCGCTGCAAACCTCAAGATCTTGCAGAACGATGGTGTGGTTAAC  
AGTCCATGCGCCCCGTCGAAGAAAACTAGCCATGCACTATTTCTGCTAGG  
TGGGCAGACCTTTATGTGTGACAAGCTATACCTGGTGGACCAGAAAGCCA  
AAGAGATCATCCCCAAGGCAGACATCCCGAGTCCGAGGAAGGAGTTCAGT  
GCCTGTGCCATTGGCTGTAAAGTTTACATAACAGGTGGGA--GAGGCTC-  
CGAAAAATGGCGTTTCCAAAGATGTATGGGTGTACGATACAGTACATGAGG  
AATGGTCCAAGGCAGCCCCCATGCTCATAGCCAGGTTTGGCCATGGCTGT  
GCAGAGCTGAAACACTGCCTGTACNNNNNNNNNNNNNNNNNNNNNNNNNNNN  
NNNNNGGATGAATACATTGTAGTGTTCAGTC  
GCTCCGTGACCAGACTGATCCTGAACGAAGCCGAGCTGATCATGGTGCTG  
GCTCAGGAGTTTTCAGATGAGAGTTGTTACGGTATCCCTGGAGGACCAATC  
TTTCCCAGCATAGTTTTCAGGTGATCAGTGGAGCCTCCATGTTGGTCAGCA  
TGCACGGGGCTCAGCTTGTGCTCTCTTTTCCCTGCCAGAGGAGCTGCC











CTGTGCCAGTACTGCGCCAGCGCTTCGGCAGGAAGGACCACCTGACGCG  
CCACGTCAAAAAGAGCCACTCGCAGGAGCTAATGAAGATCAAGACGGAGC  
CTCCCGATATGCTGGGGCTCCTGGGCTCCGGCTCGCCGCCTTGCTCCGTC  
AAGGAGGAGCTAAGCCCCATGATGTGCGGCATGGGTCCCAACAAAGACCC  
CATGATGGGCAAGCCCTTCCCAGCGGCACTCCCTTCCCATGGGCATGT  
ACAACCCTCACCAC-----CTCCAGGCCATGTCCAATTCTGGGGTGGGC  
CACCCG-----CACCCCTCTGTATGTCCAGCTCGCTGTCTGCGGCCAT  
GGGCATGGGCTGTACATGGAATACCTCATCTACGCTTCCTTCTCCTTCA  
TGGGATGTTTACAAAATTAGCGATGGATCAAACATCGTGAATTTGCTGGCC  
AGCAACTCTCCGAGTGTTCCTATGCTCTGACCCAGCAGAAGTACTTCAG  
CAACTACAGTCCCGTGATCGGGTCTACATCTATGAGCCCATCGAGTACT  
GGAATGCCACGGTGCAGGAGCACCTGAAGACGCTGAGCCACGGCTTCAAC  
AAGATCTCCTGGATGGACAACTTTTTCCATTACCTGCGGGTGGTGAATGT  
GAGCGCTCCACCAAGAACGACTTCATCAACATCCTCAAGGGCTCCTTCC  
TGCGCAGCCAGAGTACCAGCACTTCACAGAGGACATCATCTTCTCCAAG  
A---ACGCGGAGAGCG-----ACGAGTACGACATCATCGCCTCTCGCAT  
GTACCTCGTGGCGCGGACCACAGAGAAGAAGCGGGAGGAGGTGGTAGAGC  
TTCTGGAGAAGCTGCGACCGCTGATGCTGATCAACAGCATCAAGTTCATC  
GCTTTC AACCCGACCTTTGTCTATATGGACC GTTACAGTTCCCTCTGTGAT  
CTCACCCATCCTTACCTCAGGCTTCAGCGTCCCTCACCATCCTCATCCTCA  
CTTTCTTCTCCTGGTCATCAACCCCTGGGTAACCTTCTGGCTCATCCTGACC  
GTCACCTCAGTGGAGTTGGGTGTGCTAGGTTTGTATGNNNNNNNNNNNNNN  
NNNNNNNNNNNNNNNNNNNNNNNNNNNNNNNNNNNNNNNNNNNNNNNNNN  
NNNNNNNNNNNNNNNNNNNNNTCGCCGTTTTTCGCT  
ATGATGTTGCCCTAGTGTCCGCCTTAAAGGATCTGGAAGAGGACATCGTG  
GAGGGGCTGAGGGAAAGGGGGCTCGAAGACAGCGCCTGTACCTCAGGCTT  
CACTGTTATGATAAAAAGAATCCTGTGACGGCATGGGAGATGTCAGCGAGA  
AGCACGGTGGAGGCCAGCGGTGCCGGAAGAAGGCCGTGCGCTTCTCCTTT  
ACGATCATGTCTGTGTCTGTGCTGGCAGATGGAGAGGCG-----  
-----AAGGCAGTGACCGTCTTCAGAGAGCCGAAAC  
CAAActCCGAGCTGTCTGTAAAGCCCTGTGTATCATGTTTTGTAGACGAG  
TCGGACC GCGAGACTCTCACCGCCGTCCCTGGGGCCTTTGGTAGCTGAGCG  
GGACGCGATGAAGCGGAGCCAACTCATCCTTTCAATCTCTGGTCTTCTCCTC  
GCTCGTTCTGCTTCCAATT CAGAGGCACCGGCTACGATGAGAAGATGGTG  
CGCGACCTTGAGGGCCTGGAGGCCTCCGGGTGCGACCTATATCTGCACCCT  
CTGCGATTCTACTCGAGCAGAGCCCTCTCAAACATGTGCTTCACTCCA  
TCACCCG CAGCCATGATGAGAACC TAGAGCGCTATGAGATGTGGAGGACC  
AATCCATTCTCAGAGTCTGCGGAACAGCTGCGAGACAGAGTGAAAGGGGT  
GTCCGCCAAGCCTTCTGTGAAACCCATCCCACTCTGGATGCGTTACTACT  
GTGACATTGGCAATGCCACGGAGTTCTACAAAATCTTCCAAGATGAGATT  
GGGGAGGTGTTT CAGAAAGA---CAAC---CCGACTCGGGAAGAACGGCG  
CCACTGGCGGGCGGTCCCTCGATAAGCAGCTGAGGAAGAAGTTAAAGCTTA  
AACCGGTAATGAGGATAAATGGGAAC TACGCTCGGAAGTTGATGACCCCG  
GAGGCTGTGGACGTGGTGTGCGAGCTGGTGCCCTCAGAAGAGCGACGGGA  
GGCCCTGAGGGCGCTCATGCAGCTATACCTGGAGATGAAGCCCGTGTGGC  
GCACCACCTGTCCGGCCAGAGAATGCCGCGATCAGCTGTGTGCGCTT CAGC  
TTCAACTCCCAGAGCTTTGCTGAGCTCCTCTCCACTAGCTTCAAATACAG  
ATACAACGGAAAGATCACCAATTACTTT CACAAGACCCTCTCCCACGTCC  
CGGAAATCATAGAAAAGAGATGGCTCTATTGGAGCCTGGGCCAGCGAAGGA  
AACGAGTCAGCAAAAAAATCATA CACCATTGAGATCGGCCCAAAGGGCC  
AGAATGGAAGGAGAGTCCGCAGCCCTTCTCTTGTCTCCATCGAAGACCCCA  
CAAAGCAAACCAAGTTCAAGGGCATCAAGACTTACATTT CATA CAGGGTG  
ACCCCGAGCCACACGGGGCAACCCGTCTACAGACGTTACAAACACTTTGA





-----  
-----  
-----  
-----  
-----

-----AAGAAAGATTCAAGCAAGGGCACACTGGAGGATCAAATCATCC  
AGGCTAACCCAGCTCTGGAGGCATTTGGAAATGCAAAAACGCTCCGAAAT  
GACAATTCCTCGCGTTTTGGGAAGTTCATCCGCATTCATTTTGGAAACAAG  
TGGGAAACTTTCTCAGCAGACATAGAGACTTATTTGCTTGAGAAATCCA  
GAGTGACCTTTAGCTGAAATCTGAGAGAACTACCACATCTTTTCCAA  
ATCCTGTCCAATGAAAAGCCAGAGCTTTTAGACATGTTGCTGATCACAAA  
CAATCCCTACGACTACTCTTACATCTCTCAAGGAGAAGTCTCCGTTGCAT  
CTATCAACGATTCTGAAGAACTTCTTGCCACTGACAGCGCTTTTGACGTG  
CTTGGCTTTACGGCAGAAGAAAAAATGGGAGTGTACAAGCTCACAGGGGC  
CATTATGCACTATGGCAACATGAAGTTCAGCAAAAAGCAACGCGAAGAGC  
AGGCAGAGCCAGATGGCACAGAGTCAGCGGATAAGTCTGCCTATCTAATG  
GGACTGAACTCTGCTGACCTCTTGAAAGGGCTTTGTCACCCCAAGGTGAA  
GGTGGGCAATGAGTACGTACCAAGGGCCAAAGTGTGGATCAGGTTTACT  
AC-----AGAGGCCTTCAAATGCGAGGAATGTGGCAAGCACTACAAC  
ACCAAGCTGGGGTACAAGCGCCATGTTGCCATGCACTCAGCCACAGCAGG  
TGATCTCACCTGCAAGGTCTGCCTCCAGAGCTACGAGAGCACACCTGCTC  
TCCTCGAACACCTCAAGAGCCACTCAGGCAAAAAGCTCGGGCGGTACCAAG  
GAGAAGAAGCACCCATGCGATCACTGCGAGCGTCGCTTCTACACCCGCAA  
GGACGTTTCGGCGCCACATGGTGGTGCACACAGGACGCAAGGATTTCTGT  
GCCAGTACTGTGCCCGAGCATTTGGTTCGCAAGGACCACCTGACTCGGCAC  
GTAAAGAAGAGCCACTCACAAGAGCTGCTGAAGATCAAGAACGAACCGCC  
CGACATGCTAGGCTTGCTGGGATCTGGGTTCGCAACTTGTGTTGTCAAAG  
AGGAGCTAAGCCCAATGATGTGTACCATGGGACCCACCAAGGACCTCATG  
ATGGGCAAGGCCTTCCAACAGCACCCCGTTCCCTATGGGCATGTACAA  
CCCTCACAC-----CTCCAGGCTATGTCCAATCCTGGAGTGGGCCAC--  
-----CACCCTCTCTAATGCCTGGTCCACTGTCAGCTGCTATGGGT  
ATGGGCTGCCATATGGAGTATCTGATTTACGCCCTCGTTCTCCTTCATGGG  
ATGCTTACAAATCAGCGACGGGTCCAACGTGGTCAACCTGCTGGCCAGCA  
ACTCGCCAGCGTGTCTACGCCCTCACCCAGCAGAGGTAATTCAGCAAC  
TACAGCCCGGTGATTGGCTTCTACATATAACGAGCCATCGAGTACTGGAA  
CGCCACTGTGCAGGAGCACCTCAAGACCCTTGGCCATGGATTTAATAAGA  
TCTCCTGGATAGACAATTACTTCCACTACCTGAAGGTGGTSAACATGAGT  
GCGTCGAACAAAAGCGATTTTCATAAACGTTCTCAAGACGTCCTTTTGA  
GAGCCCGAGTATCAGCACTTCAATGATGACATCATCTTCTCCAAGA---  
AGGGGG-----AGGAGTATGAGATCATTGCCTCCAGGATGTAT  
CTGGTGGCCAGAACGACAGAAAAGACCCGCGAGGAGGTGGTGGAGCTGCT  
GGAGCGGCTGCGGCCCTGTTCGCTCATCAACAGCATCAAGTTCATCGTCT  
TCAACCCACCTTCGTCCTCATGGACCGCTACAGCTCCTCCGTCATCTCA  
CCCATCCTGACGTCAGGCTTCAGCGTCCTCACCGTCCTCGTCCCTCACGTT  
CTTCTGGTTCATCAACCCCTGGGGAACCTTCTGGCTGATCCTGACCGTCA  
CGTCTGTGGAGCTGGGGGTGCTCGGCCTGATGGGCTACCATCAGTTGAG  
TGGCAGCCTGCTCTGAAGAATGTGTTCGAGTGCATGCGATGTAGGCATCAT  
CAATGGACTCTCGGGCTGGACCAGCTCAGTAGATGACGTTCCCTGCTGACA  
CGATTCACGGCGCTTCGGCTATGATGTGGCCTTGGTCTCAGCGCTGAAA  
GACTTGGAAGAGGACATCATGGAGGGCTTGAGAGAGCGAAACCTGGATGA  
CAGCACCTGCACCTCAGGCTTCAAGTGTGTCATCAAAGAGTCTTGTGATG  
GCATGGGAGACGTTAGCGAGAAACATGGAGGTGGTCCAGCAGTTCCAGAA  
AAGGCGGTGCGCTTCTTTTACGGTGTATGTCCATATCTGTTTACAGGCTGA

GGGTGAAGAC-----GAGACAGTTA  
CTATCTTCCAGGAACCAAAGCCCAACTCTGAACTCTCCTGCAAGCCAATG  
TGCTGATGTTTCGTTGATGAATCTGACCATGAGACCCTTACCGCCATCCT  
AGGTCCCCTGGTGGCAGAGCGAAATGCCATGAAGGAGAGCAGACTCATCC  
TATCAGTCGGCAACCTTCCACGTTCTTCCGCTTCACTTCCGGAGCACG  
GGATACGACGAGAAGATGGTACGAGAGCTAGAAGGTCTGGAGGCATCTGG  
CTCCACTTACATATGCACCCTCTGCGACTCCACCCGTGCGGAGGCCCTCTG  
AGAACATGGTGTCTCACTCAATCACCCGAAGTCATGAAGAAAATCTGGAA  
CGATATGAAATCTGGCGGACGAATCCATTCTCAGAGTCTGCAGACGAATT  
ACGCGAACGGGTCAAGGGCGTCTCAGCCAAACCCTTTATGGAGACCCAAC  
CCACTTTGGACGCCCTGCACTGCGACATCGGGAACGCCACAGAGTTCTAC  
AAGATCTTTTCAGGATGAGATTGGAGAGGTCTACAAAAGGC---GAAT--  
-CCGAGCCGAGAAGAACGTCGTCGCTGGCGAGCTGCCCTGGACAAGCAGC  
TGAGGAAGACGATGAAGCTGAAGCCGGTGGCGCGGATGAACGGTAACTAC  
GCTCGCCGGCTGATGACCACCGAGGCGGTGGAAGTTGTTTGCGAGCTTGT  
GCCTTCAGAGGAGCGCCGTGAAGCCTTGCGTGAGCTCATGGGTCTGTACC  
TACAAATGAAACCAGTGTGGCGCTCAACCTGCCCCGCCACTGACTGCCCA  
GACCAGCTCCTCCGCTACAGCTTCAACTCCCAGCGCTTTGCTGAGATCCT  
GTCTCCACCTTCAAGTACCGGTATGATGGCAAGATCACGAACTACCTGC  
ACAAGACCCTGGCCACGTACCTGAGATAGTTGAGAGAGACGGCTCTATC  
GGAGCCTGGGCCAGCGAAGGGAACGAATCCGGGAACAAGTCTACTAT  
AGAGATGGGGCCAAAAGGGCCGAGTGAAGGAAAACCCACAGCCTTTCA  
CCTGCTCCATCGAGGACCCACCAAGCAGACCAAGTTTAAAGGGATCAAG  
ACCTACATCTCCTACCGCGTCACCCCCAGCCACATCGGCCGGCCCGTGTA  
TCGCCGCTACAAGCACTTTGATTGGCTGTACAACCGCTGTTGCACAAAT  
TCACGGTCATCTCTGTGCCCCACCTGCCTGAGAAGCAGGCGACGGGCCGT  
TTTGAGGAGGACTTCATTGAAAAGCGCAAACGGAGGCTCATCCTCTGGAT  
GGAGCACATGACCAGCCACCCGGTGTGTCCAGTACGAGGGCTTTGAGC  
ACTTCTCATGTGCGGCGACGACAAGCAGTGAAGCTGGGAAAGCGGCGG  
GCAGAGAAGGACGAGATGGTGGGTGCTCACTTCATGCTCACCTTCCAGAT  
CCCCAAAGAGCACCAAGACCTGCAGGACGTTGAGGAGCGGGTGGACACCT  
TCAAGCTTTTTGCCAAAAGATGGACGACAGTGTCTACAGCTCACTCAT  
GTGACTTCAGAACTGGTGCGCAAACATCTCGGAGGCTTCCGGAAGGAGTT  
CCAGAGGCTGGGCAACGCTTTCCAGTCCATCAGCCAGGCTTTTATGTTGG  
ATCCTCCATACAGCTCTGATGCTCTGAGCAATGCCATCTCCCACCTCTC  
GTCACGTTCCCTCAAACCTGACCTCCCTGGGATTTCATCATTGGCGTCGGCGT  
GGTCGGCAACCTCCTGATTTCCATCCTGTTGGTCAAAGACAAAAGCCTGC  
ACCGGGCTCCCTACTACTTCCCTGCTGGACCTGTGTGCCTCGGATATCTTG  
CGCTCTGCAATCTGCTTCCCCTTCGTCTTCACTCCGTCAAGAACGGCTC  
CGCTGGACGTACGGCACCTCACCTGCAAGGTGATCGCTTTCTGGGGG  
TCCTTTCTGCTTCCACACGGCCTTCATGCTCTTCTGCGTCAGCGTCACC  
CGCTACCTAGCCATAGCCCACCACCGATTCTACACCAAGAGGCTAACGTT  
CTGGACCTGCTTGGCTGTCAATTTGCATGGTGTGGACGCTTTCGGTGGCCA  
TGGCCTTCCCTCCGGTGTGGACGTGGGCACGTACTCCTTCATCAGGGAG  
GAGGACCAGTGCACCTTCCAGCACCGCTCTTTCCGGGTCAAACGACTCGCT  
GGGCTTCATGCTCCTGCTGGCCCTCATCCTGCTGGCCACCCAGCTGGTCT  
ACCTCAAACCTCATCTTCTTTCGTTTACGACCGCCGGAAGATGAAGCCCGTC  
CAGTTCGTGCCCGCAGTCAGCCAGAACTGGACCTTCCACGGGCCGGGAGC  
GAGCGGCCAGGCGGCGGCAACTGGCTAGCGGGCTTCGGACGAGGCCCGA  
CTCCGCCCACCCTGCTGGGCATCAGGCAAAACAGCAACGCGGCGGGGCGG  
CGGCGGCTCCTGGTGTGGACGAGTTTAAAGACAGAGAAGCGGATCAGCCG  
GATGTTCTACATCATGACCTTCTTCTTTCTGGCTCTGTGGGGGCCGTACC  
TGGTGGTGTGCTACTGGAGGGTGTTCGGCCCGTGGCCGGTGGTGCCAGGC



GGGTACCTGACGGCTGCAGTGTGGATGAGCTTCGCCAGGCTGGGGTCAA  
CCCCTCATCTCATCTNNNNNNNNNNNNNNNNNN-----

-----  
-----  
-----  
-----  
-----  
-----  
-----  
-----  
-----  
-----  
-----  
-----  
-----  
-----  
-----  
-----  
-----  
-----  
-----  
-----  
-----  
-----  
-----  
-----  
-----  
-----  
-----  
-----  
-----  
-----  
-----  
-----  
-----  
-----  
-----  
-----  
-----  
-----  
-----  
-----  
-----  
-----

>*Dibranchus* *tremendus*  
AGCCTGCTCATTCGAGCTGAACCTAAGCCAACCGGGCGCCCTCTTAGGGGA  
TGACCAGATTTACAATGTTATCGTCACGGCTCATGCTTTTGTAATAATTT  
TTTTTATAGTAATGCCAATCATGATTGGCGGCTTTGGGAACTGGCTAGTG  
CCCCAATAATCGGGCGCCCCGATATAGCATTCCCGCGAATGAACAACAT  
AAGTTTTTGACTGCTGCCCCATCCTTCCTTCTACTCCTAGCTTCTTCTG  
GCATTGAAGCCGGGGCTGGAACCGGATGAACAGTATACCCCCGCTAGCC  
GGGAATCTCGCCCATGCAGGAGCCTCGGTTGATTAACTATCTTCTCACT  
TCACCTTGCAGGGGTGTCATCAATCTTGGTGCGATCAACTTTATCACCA  
CAATTATCAACATAAAACCCCCGCCACATCTCAGTACCAGACGCCCTG  
TTCGTGTGGTCAGTATTAATTACTGCAGTACTCCTTCTTAGCATTACC  
AGTCCTTGCTGCTGGCATTACAATGCTACTTACTGACCGAAACCTGAACA  
CTACTTTCTTTGATCCTGCTGGGGGAGGCGACCCTATCTTTTACCAACAC  
TTA-----

-----  
-----  
-----  
-----  
-----









GATCCCATGGAATCTCAAATACCTGAAGGTCAGAGAGGTGAAATACGAGNNNNNNNNNNNA  
GGAAAGATTCCAGCAAGGGGACCCTGGAGGATCAGATCATCCAGGCGAAC  
CCGGCACTAGAAGCCTTCGGCAATGCCAAAACATTGAGAAATGACAACTC  
GTCTCGGTTTTGAAAATTCATCCGGATTCACCTTTGGTACAAGTGGTAAGC  
TGTCATCTGCAGACATAGAGACATATTTGTTGGAGAAGTCCAGGGTGACT  
TTTCAGCTGAAAGCAGAGAGAACTACCACATCTTTTACCAGATCCTGTC  
CAATCACAAGCCGGAGCTTTTGGATATGTTACTAATCACCAACAACCCAT  
ATGACTACTCCTACATCTCCCAAGGGGAGGTAACGGTCGCTTCCATCAAT  
GACTCAGAGGAGCTGATGGCCACAGACAGCGCCTTTGATGTTCTTGGATT  
CACCACAGAGGAGAAGATGGGTGTCTACAAATTGACAGGTGCCATCATGC  
ACTACGGCAACATGAAGTTCAAGCAGAAGCAACGTGAGGAACAGGCTGAA  
CCTGATGGCACAGAGTCTGCTGATAAGTCAGCTTACCTAATGGGGCTGAA  
CTCTGCAGACCTCATCAAAGGGCTGTGCCACCCTCGAGTCAAGGTGGGAA  
ATGAGTATGTGACCAAAGGCCAAAAGTGTAGACCAAGTCTACTACCCCAAC  
AAGGAGGCCTTTAAGTGTGAGGAGTGTGGGAAGCACTACAACACCAAACCT  
GGGATATAAACGCCATGTGGCCATGCATTCTGCCACAGCAGGTGATCTCA  
CCTGTAAAGTGTGCATGCAAACCTATGAGAGCACGCCGGTGCTCCTGGAG  
CACCTGAAGAGCCACTCTGGGAAGTCTTCAGGTGGCACCAAGGAGAAGAA  
ACATCCCTGCGACCACTGTGACCGTCGTTTTCTACACACGGAAGGATGTGA  
GGCGACACATGGTGGTCCACACGGGCCGGAAGACTTCCCTGTGCCAGTAC  
TGTGCCCAGCGCTTTGGCAGGAAGGATCACCTGACTCGCCATGTGAAGAA  
AAGCCACTCACAGGAGCTGCTGAAGATTAAGACGGAGCCTCCAGATATGT  
TAGGTCTTTTAGCATCGGGGTCACCACCCTGTTCTGTGAAGGAGGAGCTC  
AGCCCCATGATGTGTGGTGTGGGCCCTAACAAAGACCCTATGATGGTTAA  
ACCTTTCCCCAGTGGAGCCCCATTTCCAATGGGTATGTACAATCCCCACC  
AT-----CTCCAGCCATGTCCAACCTCTGGGGTGGGTCACCCA-----  
CACCCGTCCTCATGCCCAGTCCCTTGTCTGCAGCTATGGGCATGNNNNNNNNNNNNNTATCT  
CATTATGCATCTTTCTCATTTCATGGGATGTTTACAAATCAGTGATGGGT  
CAAATATTGTAAACCTGTTGGCCAGTAACTCCCCAAGTGTTCATTTGCT  
TTGACCCAGCAAAAATACTTCAGTAACTACAGCCCTGTGATTGGATTTTA  
TATTTACGAGCCTATAGAGTACTGGAACCTCAACAGTGCAAGAGCACTTGA  
AAACTCTGAGTCATGGCTTCAATAAGATCTCCTGGATGGACAACCTTTTTC  
CACTACCTTAAAGTGGTGAACGTGAGTGCTTCAACCAAGAATGACTTCAT  
CACCAGCCTCAAGGGCTCTTTCCCTGCGCAGCCCGAGTACCAGCACTTCA  
CTGAGGACATCATATTTCTCAAAGA---ACCGTGAGACTG-----ATGAA  
TACGACATTATTGCTTCACGGATGTACTTAGTGGCACGAACAACAGAGAA  
GAAGCGGAGGAGGTGGTGGAACTGTTGGAAAAGCTTCGTCCATTAATGC  
TAATCAACAGCATTAAAGTTCATTGCTTTCAACCCGACATTTGTGTTCATG  
GACCGCTACAGCTCCTCGGTTCATCTCGCCATCCTGACCTCAGGATTCAG  
TGTACTCACAATCCTCATCCTCACCTTCTTCCCTGGTTCATCAATCCTTTGG  
GTAACCTCTGGCTCATCCTCACTGTAACATCAGTGGAACCTGGGTGTCTTG  
GGTCTGATGGGCTTTTCATCAGTTTGGAGTGGCAGCCAGCTCTCAAGAATGT  
GTCTACATCTTGCAATGTTGGAATTATTAATGGCCTCTCTGGATGGACTT  
CCTCAGTAGATGACTTCCCAGCTGACACCATAACACGACGGTTTCGCTAT  
GATGTGGCACTAGTGTGAGCATTAAAGGATCTGGAGGAGGATATCATGGA  
GGGACTGAAAGAGAATGGGATGGAAGACAGCATTGTACATCAGGCTTCA  
GTGTCATGATCAAAGAATCTTGTGATGGTATGGGTGATGTCAGTGAGAAG  
CAYGGTGGAGGACCCTGTTCCCTGAGAAGGCTGTCCGTTTCTCTTTCAC  
TGTTATGTCTGTCTGTCTGTCATGGCAGATGGTGAGACC-----  
-----GAAAAGTT---ATCTTCAGTGAGCCAAAGCCA  
AATTCAGAGTTGTCTGTAAGCCTCTTAGTCTGATGTTTGTGGATGAGTC  
AGATCATGAAACACTCACAGCTATCATGTCGCCCCCTTATTGCAGAACGTA  
AYGCAATGAAAGATAGCAGACTCATAGTTTCCATCGGTGGACTGCCCTCGC

TCCTTCGGCTTTCAC TTCAGAGGCACAGGATACGATGAGAAGATGGTGCG  
TGAGATGGAGGGCCTCGAGGCCTCTGGGTCCACCTATATCTGCACGCTTT  
GTGATTCAGTCGCGCAGAGGCTTCTCAAACATGGTACTACACTCAATC  
ACTCGCAATCATGAAGAGAACCTAGAGCGCTATGAAATATGGAGAACCAA  
TCCTTTTTCTGAGTCTGCAGATGAGCTGCGAGACAGAGTCAAAGGGTCT  
CTGCAAAGCCCTTTATGGAAACCCATCCCCTCTGGATGCACTACACTGT  
GACATCGGCATTGCCACTGAATTTTACAAAATCTTCCAGGATGAGATAGG  
GGAAGTGTACCAAAGGT---CAAC---CCTAGCCGGGAGGAACGGCGCA  
GCTGGAGGGCAGCCCTAGATAAACAGCTGAGGAAGAACTGAAGCTAAAA  
CCAATAATGAGGATGAATGGAACTTTGCACGCCGGCTCATGACCCTAGA  
GGCTGTGGAGGCGGTGTGTGAGTTGGTGCCACAGAGGAGAGGGAGG  
CCCTGAGGGAACCTTATGAGGCTCTTCCCTACAGATGAAGCCTGTGTGGCGA  
GCTACCTGCCAGTCAAAGAGTGCCCTGACCAGCTGTGCCGCTATAGCTT  
TAACTCTCAACGCTTCGCAGACCTCCTCTCCTCTTCTTCAAATATAGGT  
ACAATAAAAAGATAAGTAATTACATGCACAAAACCTTTGGCCCATGTTCCCT  
GAGATCATAGAGAGAGATGGATCCATAGGAGCGTGGGCTAGTGAGGGGAA  
TGAGTCTGCAAACAAATGTTACACCATTGAGATGGGKCTGTTGGGACCCC  
AGTGGAAGGAGAGCCACAGCCTTTCTCATGCTCCATTGAAGACCCACACA  
AAACAGACAAAGTTCAAGGGTATCAAGACKTATATTTTCATACCGGGTCAC  
TCCAAGCCACACRGCACATCCCCTGTACAGACGCTATAAACACTTTGATT  
GGCTATAACAACCGCTTACTGCATAAATTTACTGTGATCTCAGTGCCTCAC  
TTGCCCTGAGAAACAGGCCACGGGGCGATTTGAGGAAGACTTCATTGAGAA  
GCGCAAGAGRAGACTGATATTGTGGATGAACCAYATGACCAGTCATCCMG  
TCCTCTCCCAGTATGAGGGCTTTGAGCACTTCTGATGTGTGCTGATGAC  
AAGCAGTGGAACTGGGCAAGAGACGGGCAGAGAAGGATGAGATGGTGGG  
TGCCCATTTTCATGCTGACCCTCCAGATCCCAAATGAACACCAGGACCTTC  
AGGATGTAGAGGAGCGGGTTGATTCTTCAAGTCTTTGCCAAGAAAATG  
GATGACAGTGTGATGCAACTCACACACGTACCTCAGAGTTGGTGAGTAA  
GCACCTCGGGGGATTGAGGAAGGAGTTCCAGCGCTGGGAAATGCCTTCC  
AGTCTATCAGCCAGGCATTTCATGCTGGACCCTCCCYACAGCTCAGAGACC  
CTAAACAACNNNNNNNNNNNNNNNNNNNNNNNNNNNNNTCCTCAAAC TGACCTCTCTGGGTTTCATCATTGGAG  
TTGGT  
GTGGTTGAAACCTCCTGATCTCCATCCTGCTGGTCAAAGATAAGAGCCT  
GCACCGAGCACCCCTACTATTTCTGCTGGACCTGTGTGCCTCCGATATAC  
TTCGATCCGCCATCTGCTTCCCGTTTGTCTTCACCTCTGTCAAGAATGGA  
TCTGCCTGGACGTACGGCACGCTGACCTGCAAGGTGATCGCCTTCTGGG  
TGTGCTCTCCTGTTTTACACGGCTTTTATGCTGTCTGTGTGTCAGTGTCA  
CACGCTACCTAGCCATAGCACACCACCGTTTTCTACACCAAGAGGCTGACC  
TTCTGGACCTGTCTGGCTGTCTGATCTGCATGGTGTGGACGTTGTCCGTGGC  
GATGGCGTTCCCTCCTGTGCTAGATGTAGGGACGTACTCTTTTATCCGAG  
AGGAGGACCAGTGCACGTTCCAGCACCGCTCTTTCAGGGCGAACGATTCC  
CTGGGCTTCATGCTCCTACTGGCACTCATCCTCCTGGCCACACAGCTGGT  
TTACCTCAAGCTCATTTTTTTTTGTCCATGACCGTCGGAAGATGAAGCCTG  
TCCAGTTTGTGCCTGCCGTTAGCCAGA ACTGGACCTTCCACGGACCAGGT  
GCCAGCGGGCAAGCGCTGCCAACTGGCTGGCTGGATTCCGGTCGAGGACC  
CACCCCGCCTACTCTGCTGGGCATTCGACAGAACAGCAACGCGGCAGGCC  
GCAGACGTCTACTGGTTTTGGATGAATTCAAAACAGAGAAGAGGATTAGT  
AGGATGTTCTACATCATGACGTTTTTCTTCCCTGGCACTGTGGGGGCCCTA  
TCTGGTTGCCTGTTACTGGCGGGTATTTGCAAGGGGCCCGTGGTCCCTG  
GGGGCTACCTGACAGCAGCTGTGTGGATGAGCTTTGCCAGGCTGGGGTC  
AATCCTTTCATCTGCNNNNNNNNNNNNNNNNNNNGCCAAATCTCGCTTTCACCCCTGGCATGGGGACTGG  
TCCTGGCACGGAGC---GCAGCGTCCCACTCGGCAACAGCTTGCTATCCC  
CGCAGCAAACCGAGGAGCCACTCTTGACACCCCCCGCAGCGATGGTTT

GTCACCC---CTGCCAACAAACCGACTGGACTTTGCAGCCTCGGCATACGA  
CGCCGCT-----GATTTCCGCGGTAACGCGGCCACCTTGCTGTCCT  
ACGCAGCGGCCGGAGTGAAGGCGC-----TTCTCTGCCGACTGCAGGC  
TGCTCCAATCGGCCTCTTGGCTATTACGCAGACCCGTCAG---GCTGG--  
-GGAGGACGCACGCCGCCGAATACTGTGGCGTGAACAGCAAATCCAGTT  
CGGTCTTTTCTTGCTGGCCCTCCAACCTATCGGAGCCAGAGCAGGTA--  
-CC---AATTACCTGG-----CTGAGGA---GGG---GACTC---  
ACTGCCGACAGAGAGGTCACCG---AT---CGGCGGTTCTGAGGAC---A  
CCAAACCTAAAGACATAAC---GTTAGA---GTCGAACTGGATAAAG---  
ACGCCGTCCTCCATTAAATCCATTGATTCAAGCGACTCTGGAATCTTTG-  
--AACAGGCTAAACGGAGAAGGATGTCACCTTCTGCCACACCA-----  
--GTTTCAGAGACAAATGTCCCCGTAAAGTCTGAGCATCACTCAACAGGC  
GAAGTCACAGAGAGAGAAGTGGCGTTGGGGATAAAATCCGTTTCGCAGATGG  
GATGGGCGCCTTCAAATAAAACCACAGCTCCCATGATATTGGCTCCGG--  
-ACAAACAGCGTTTTCCTCTCAGGCG---CCCAGCTACGCAGCGGCAGCA  
GCCCTGGGA---CACCACCA-----CCACCCGACCCACGTAGGCTCT--  
-TACTCCACGGCAGCTTTCAACTCCACCAGGGACTTTCTCTTCAGAAATC  
GGGGATTTGGTGACGCCACCGG-----TGCACAGCACAGTTTG  
TTCGCGTC-----CGGAAGTTT---C-----GCAGGGCCACATGG  
ACACTCAGATGCAGCGGGGCACCTGCTGTTCCCGGGGCTTACAGAG---C  
AAGCGGCGAGCCACGCGTCTTCCAATGTGGTTAACAGCCAGATGCGACTT  
GGCTTCTCGGGGACATGTATGGAAGGGCCGACCAGTATGGCCACGTTAC  
GAGCCACGGT---CCGACCATTACGCGTCGACCCAGCTCCACGGCTACG  
GCCCCATGAACATGAATATGGCCGCG---CACCACGGAGCAGGGGCCTTC  
TTTCGATACATGAGGCAGCCGATCAAACAAGAGCTCATCTGCAAATGGAT  
CGAGCCGGAGCAGCTGACAAATCCCAAAAAGTCGTGCAACAAAACTTTTA  
GCACGATGCACGAGCTCGTCACCCATATCACCGTGGAGCATGTTGGGGGA  
CCTGAGCAGACCAACCACATCTGCTTTTGGGAGGACTGCGCCAGAGAAGG  
AAAGCCATTCAAAGCCAAATACAAACTTGTGAATCATATCAGAGTACACA  
CCGGCGAAAAGCCCTTTCGTTCCGTTCCCGGGCTGTGGCAA

>*Diplophos taenia*

AGCCTACTTATCCGGGCGGAGCTTAGCCAGCCTGGCGCGCTTCTAGGCGA  
TGATCAAATTTATAATGTAATCGTTACGGCGCACGCCTTCGTAATAATCT  
TCTTTATAGTAATAACCAATTATGATCGGGGATTTGGAACTGATTAATT  
CCTCTTATGATTGGGGCCCCGGACATGGCCTTTCCTCGAATGAACAACAT  
AAGCTTCTGGCTCCTCCCGCCCTCGTTCCTTCTTCTCCTGGCTTCTCCG  
GGGTGGAAGCTGGGGCCGGGACGGGTGAACCGTGTACCCCCCTCTCGCC  
GGCAATCTTGCCCATGCAGGAGCCTCCGTTGACCTGACCATCTTCTCCCT  
CCACCTCGCAGGGATCTCCTCTATTTCTTGGGGCAATCAACTTCATCACTA  
CAATCATTAACATAAAACCCCTGCCATCTCCCAGTATCAAACCCCTCTA  
TTCGTGTGAGCAGTCTAGTCACTGCCGTTCTCCTTCTATTATCCCTCCC  
TGTTCTGGCTGCGGGGATTACAATACTTCTCACGGACCGGAACCTGAACA  
CCACCTTCTTTGACCCGGCAGGAGGGGGGACCCAATCCTTTACCAGCAC  
CTCTTTGATTCTTCGGGCACCCCGAAGTGTACATTCCTAATCCTCCCGGG  
CTTTGGTATGATCTCCACATTGTTGCCTACTACGCAGGGAAAAAGAGC  
CCTTCGGGTATATAGGGATGGTGTGAGCCATGATGGCCATCGGACTTCTA  
GGCTTCATCGTCTGGGCCACCACATGTTACGGTCGGAATGGACGTTGA  
CACCCGAGCATATTCCTGGAGAGGAACCTGCACCCGTCCAACCTGCCGGG  
CATGCTGCTGCTGTCGGACGCCACCAGTGCACCAAGCTGTCCGAGCTGT  
CCTGGGGCATGTGCCCTCGGCAACTTCCCGCCATCTGCAAGACGGAGGAC  
TTCTCCAGCTCCCCAAGGACATGGTGGTGCAGCTGCTGTCCCACGAGGA  
GCTGGAGACGGAGGACGAGAGGCTGGTGTACGAGGCCGCCCTCAACTGGG  
TCAACTACGACCTGGAGAGGCCCACTGCCACCTGGCCGAGCTGCTGCGG



ACGGTGGCCTGGCGCTGCTGCCCGCCATCTTCCTCATGGAGAACGTGTC  
CACGGAGGAGCTGATCAACGCCCAGGCCAAGAGCAAGGAGCTGGTGGACG  
AGGCCATCCGCTGCAAGCTGAAGATCCTGCAGAACGACGGCGTGGTCAAC  
AGCCCCTGCGCCCCGCCCCGCAAGACCAGCCACGCCCTGTTCCCTGCTGGG  
CGGACAGACCTTCATGTGCGACAAACTGTACCTGGTGGACCAGAAGGCCA  
AAGAGATCATCCCCAAGGCGGACATCCCCAGCCCCAGGAAGGAGTTCAGC  
GCCTGCGCCATCGGCTGCAAGGTCTACGTACCCGGCGGCA--GGGGCTC-  
GGAGAACGGCGTGTCCAAGACGTGTGGGTGTACGACACCGTCCAGGAGG  
AGTGGTCCAAGGCGGCGCCCATGCTCATCGCCCGGTTCCGGCCACGGCTCG  
GCCGAGCTGAAACACTGCCTCTACGTGGTGGGAGGGCACACGGCGGCCAC  
GGGCTGCCTCCCGGCTCGCCCTCGGGACGAGTACATAGTGGTGTTCAGT  
CGCTCCTCTACGAGGCTGATTCTGAACGAGCCAGAGCTAATCATGGTGT  
GGCGCAGGAGTTTCAGATGAGGGTGGTCACGGTGTCTCTGGAAGAGCAAT  
CCTTCCCCAGCATCATCCAGGCGATCAGCGGCGCTCCATGCTGGTCAGT  
ATGCACGGAGCTCAGCTTGTACCTCCCTCTTCCTCCCCAGAGGGGCTGC  
CATTGTGGAGCTCTTCCCCTATGCTGTGAACCCAGAGCAGTATACTCCAT  
ACAAAACCCTGGCGTCCCTCCCAGGCATGGATCTTCAATATGTTTCCTGG  
AGAAACACAATCGAAGAGAACTCAGTTAGCCACCTCGATAGGTCTGGGA  
CCAAGGAGGCATTGCTCACCTGGACAAGGAAGAGCAGGAGAGAATTCTCG  
CCAGCAAGGAGGTCCCAGGCACCTGTGCTGCCGCAACCCCGAGTGGCTC  
TTCCGAATCTACCAGGACACTCTGGTGGACATCCCCTCATTCCCTCAAGAC  
CCTCAA---GGAGGGCCTAAAG---ACCAGGCCAGCTTGAAGAA---GT  
CCAAGTCGGCCAGCACTGTTACCCGGGCCGGGTCAGGGAAGCCCAGTGC  
CAGACCTCGGTCCAGGACACCAACGAGGCTAAACTCACTGTCTCCTGGCA  
GATCCCCTGGAATCTCAAGTACCTGAATGTACGAGAGGTTAAGTACGAGG  
TCTGGA-----AAAAGGATTCCAGCAAGGGAACCTTGGAGGATCAAATC  
ATCCAGGCTAATCCTGCCCTGGAGGCTTTTCGGTAATGCTAAAACATTGAG  
AAATGACAACCTCATCACGCTTTGGCAAATTCATCCGGATTCACTTTGGAA  
CTASTGGCAAGTTGTCTCTGCAGACATAGAGACATACCTTCTGGAAAAG  
TCACGCGTCACCTTTCAGCTCAAGTCAGAGAGGAACTACCATATCTTCTT  
CCAGATCTTGTCCAATCAAAGCCAGAGCTGTTGGACATGCTTTTGATCA  
CCAACAATCCATATGACTACTCCTACATCTCCCAAGGAGAAGTAACAGTA  
GCATCCATCAATGATTCAGAGGAGCTGATGGCCACTGACAGTGCATTTGA  
TGTGCTTGGCTTTACTCAAGAGGAGAAAATGGGGGTSTACAAGTTGACAG  
GTGCAATCATGCATTACGGCAACATGAGGTTCAAGCAAAGCAGCGTGAG  
GAGCAGGCAGAACCTGACGGCACTGAGGCTGCTGACAAGTCAGCTTACCT  
AATGGGGCTGAACTCTGCAGATCTAGTGAAAGGACTCTGCCATCCCAGGG  
TTAAGGTTGGCAATGAGTATGTACWAAAGGGCAGGGTGTGACCAAGTC  
TATTACCCCAACAAGGAGGCCTTCAAGTGCAGGAGTGCAGGCAAGCACTA  
CAACACCAAGCTGGGCTACAAGCGCCATGTGGCCATGCACTCGGCCACGG  
CCGGCGACCTCACCTGCAAGGTGTGCCTGCAGAGCTACGAGAGCACGCCG  
GCCCTGCTGGAGCACCTGAAGAGCCACTCCGGCAAGTCGTCCGGCGGGCGC  
CAAGGAGAAGAAGCACCCGTGCGACCACTGCGACCCGGCGCTTCTACACGC  
GCAAGGACGTCCGGCGCCACATGGTGGTGCACACGGGCGCAAGGACTTC  
CTGTGCCAGTACTGCGCCAGCGCTTCGGCAGGAAGGACCACCTGACGCG  
CCACGTGAAGAAGAGCCACTCGCAGGAGCTGCTGAAGATCAAGGCGGAGC  
CTCCGGACATGCTCGGCCTGCTGGGTACCCGGCTCCCCGCCCTGCTCCGTC  
AAAGAGGAGCTCAGCCCCATGATGTGCAGCATGGGTCCCTCCAAGGACCC  
TCTGATGGCTAAGCCCTTCCCCGGCGGGACCCCTTCCCCTTAGGCATGT  
ACAACCCTCAC-----CTGCAGGCCATGTCCGGCCCCGGGGGGGCC  
CAC-----CACCCCTCCCTGATGCCCGGCTCCCTGTCCGGCGGCCAT  
GGGCATGGGCTGCCACATGGACTACCTGATCTACGCCTCCTTCTCCTTCA  
TGGGATGTTTACAAAATCAGCGACGGGTCCAACGTGGTCAACCTGTTGGCC

AGCAACTCGCCCAGCGTGTCTGACGCGCTGACCCAGCAGAAGTACTTCAG  
CAACTACAGCCCGGTGATCGGCTTCTACATCTACGAGCCCATCGAGTACT  
GGAACTCCACGGTGCAGGAGCACCTGAGGACGCTGGGCCAAGGCTTCAAC  
AAGATCTCCTGGATGGACAATACTTCCACTACCTGAAGGTGGTGAACGT  
GACCGCCGCCACCAAGAGCGACTTCATCGCCGTGCTCAAGGGCTCCTTCC  
TGAAGAGCCCGGAGTACCAGCACTTCACCGAGGACATCATCTTCTCCAAG  
A---AGGGCG-----AGGAGTACGACATCATCGCGTCGCGGAT  
GTACCTGGTGGCGCGCACCACCGAGAAGACCCGCGAGGAGGTGGTGGAGC  
TGCTGGAGAGGCTGCGGCCCTGGCGCTCATCAACAGCATCAAGTTCATC  
GTATTC AACCCACCTTCGTCTTCATGGACCGCTACAGCTCCTCGGTGGT  
GTCGCCATCCTCACCTCCGCCTTCAGCGTGCTCACCATCCTCATCCTCA  
CCTTCTTCTGGTTCATCAACCCGCTGGGGA ACTTCTGGTTGATCCTGACC  
GTCACCTCGGTGGAGCTGGGCGTCTGGGTCTGATGGGCTACCACCCCTT  
TGAGTGGCAGCCGCCCTCAAGAACATGTCCACATCCTGCCAGGTGGGCA  
TTATCGATGGGCTGTCAGGGTGGGCTGCCTCCGTAGATGACTGCCAGTG  
GACACTGTCACCCGGCGGTTCCGCTATGACGTGGCGCTGGTATCAGCTCT  
GAAGGACCTAGAGGAGGACATCATGGAGGGGCTGATGGAGTGCGGCCTGG  
AGGACAGCATCTGCACCTTGGGCTTCAGCGTGATGATCAAGGAGTCTGC  
GATGGCATGGGGGACGTCAGCGAGAAGCATGGTGGGGGGCCGATGGTGCC  
TGAAAAGGCTGTGCGATTCTCCTTCACTGTCATGGCTGTCTCTGTCCAGG  
CAGAGGGAGAGGAT-----GAGGCC  
GTCACCGTCTTCAGAGAGTCCAAGCCAACTCTGAGCTGTCCTGCAAGCC  
TCTGTGTCTGATGTTGTGGATGAGTCTGATCACGAGACACTGACAGGCA  
TCCTTGGGCCTGTGGTGGCTGAGAGGAACGCTATGAAGAACAGCCGCCTC  
ATACTGTCTCTCGGGGGCCTCCCTCGATCCTTTTGTCTTCCACTTCAGGG  
CACAGGCTATGATGAGAAGATGGTGCCTGAGATGGAGGGCCTGGAGGCCT  
CAGGCTCCACATATGCTCTGCACCCCTCTGTGACTCCACCCGTGCAGAGGCC  
TCCCACAACATGGTGCTTCACTCCATTACCCGCAGCCACGATGAGAACAT  
GGAGCGCTACGAGATCTGGAGGACTAACCCTACTCCGAGTCCGCAGATG  
AGCTTCGGGATCGGGTGAAAGGTGTCTCTGCCAAACCCTTCATGGAGACT  
CAGCCCACCCTAGACGCTCTGCACTGTGATATCGGTAACGCCACCGAGTT  
CTACAAGATCTTTCAGGATGAGATCGGGGAGGTGTACCGGAAGCC---CA  
AC---CCAAGCAGGGAGGAGCGCCGAGCTGGCGGGCTGCTCTGGACAAG  
CAGCTGAGGAGGAAGATGAAGCTGAGGCCAGTGATGAGGATGAATGGGAA  
CTATGCCCCGAGGCTGATGACCAGCGAGGCAGTGGAGAGTGTGTGTGAGC  
TAGTCCCTCAGAACAGCGCGTGAGGCTCTCAGGGAGCTGATGGGACTC  
TATCTCAAATGAAGCCTGTGTGGCGCTCCACCTGCCGGCCAAAGAGTG  
CCCTGACCAGCTGTGCCGCTACAGCTTCAACTCCCAGAGGTTTGGTGAGC  
TCCTCTCCACCACCTTCAAGTACAGATATGACGGTAAGATCACCAACTAC  
CTTCAAGACACTGGCCACGTGCCGGAGATCATAGAGAGGGACGGCTC  
TATCTGGGCCTGGGCCAGCGAGGGAATGAGTCAGGCAATAAGTCTTACA  
CAATCGAAATGGGCCCAAAGGGCCTCAGTGGAAAGGAGAGCCCTCAGCCT  
TTCTCTTGTTCTGTGAGGACCCTACCAAACAGACCAAATTTAAAGGCAT  
CAAGACCTACATATCTTACCGAGTCACGCCAGCCACACAGGGCGACCCG  
TATACCGTCCGTACAAGCACTTTGATTTGGCTATAACAACCGCCTGCTGCAT  
AAGTTCACCTGTCATCTCTGTGCCTCACCTGCCAGAGAAGCAGGCCACAGG  
GCGTTTCGAGGAGGACTTCATCGAAAAGCGCAAAAAGGCGACTGATCCTCT  
GGATGGACCACATGACCAGTACCCCTGTCTCTCCAATATGAGGGCTTC  
GAGCACTTCTCATGTGCGCTGATGACAAACAGTGGAAAGCTGGGCAAGCG  
GCGGGCGGAGAAGGATGAGATGGTGGGTGCCACTTCATGCTGACCTTTC  
AGATTTCCAATGAGCACCAGGACCTGCAGGACGTGGAGGAGCGAGTGGAC  
TCCTTCAAGTCTTTTGCCAAGAAAATGGATGATAGTGTGATGACGCTGAC  
GCATGTGGCCTCAGA ACTGGTGCGGAAACATCTAGGGGGTTTCAGGAAGG

AGTTCCAACGTCTGGGGAATGCTTTCCAGTCTATAAGTCAGGCATTTATG  
CTGGACCCTCCTCACAGCTCTGATGCCCTCAACAATGCCTTCTCGCAC--  
-----AACTGACCTCTCTGGGTTTCATAATTGGAGTCG  
GCGTGGTAGGAAACCTGCTGATCTCTATCCTGCTGGTCAAAGACAAAAGC  
CTGCACCGCRCNCCCTACTACTTCTTGCTGGACCTGTGCGCCTCCGACATC  
CTGCGCTCCGCCATCTGCTACCCCTTCGTCTTACCTCTGTCAAGAATGG  
ATCCGCCTGGACCTACGGCACGCTCACCTGCAAAGTGATTGCCTTCCTTG  
GCGTACTCTCCTGTTTCCACACGGCATTATGCTGTTCTGCGTCAGCGTC  
ACCCGCTACCTGGCCATCGCCCACCACCGTTTCTACACCAAGAGGCTGAC  
TTTTCTGGACCTGCCTGGCCGTCATCTGCATGGTGTGGACGTTATCCGTGG  
CCATGGCCTTCCCCCCAGTTCTCGATGTAGGGACTTATTCCTTTATCCGG  
GAGGAGGACCAGTGATATTCCAGCACCGCTCCTTCAGGGCTAACGACTC  
CCTGGGCTTTATGCTCTTGCTGGCACTTATCCTGCTGGCTACGCAGCTGG  
TTTACCTCAAGCTCATCTTCTTTCGTCCATGACCCGAGGAAGATGAAGCCT  
GTCCAGTTTGTGCCAGCTGTCAGCCAGAACTGGACCTTCCATGGGCCTGG  
TGCCAGCGGGCAGGCAGCGGCCAACTGGCTGGCCGGATTTCGGGAGAGGCC  
CCACCCCGCCTACCTTGTGGGCATCCGTTCAGAACAGCAACGCGCCGGGC  
CGCAGGCGTCTGCTGGTGTGGATGAGTTTAAAACAGAGAAGAGGATAAG  
TAGGATGTTCTACATCATGACGTTTTTTTTTCTGGTGTGTGGGGGCCCT  
ATCTAGTGGCCTGCTACTGGCGGGTGTTCGCCA-----

-----  
-----  
-----  
-----  
-----  
-----  
-----  
-----  
-----  
-----  
-----  
-----  
-----  
-----  
-----  
-----  
-----  
-----  
-----  
-----  
-----  
-----

-----CAGGCGNAAGTCACAGAANGAGAGGTGGCTTTGGGGATA  
AATCCGTTTCGACAGCGGGATGGGCGCTTTCAAAATCAACCACAGCTCGCA  
TGATCTTGGCTCCGG---GCAAACAGCGTTTTCTCCTCTCAAGCA---CCCG  
GCTAC---GCAGCCGCTGCCCTCGGA---CACCACCA-----CCATCCA  
ACACATGTCAGCTCT---TACTCCACCGCGGCTTCAACTCCACTCGGGA  
CTTTCTTTTCAAAAAATCGGGGCTTCGGAGACGCCACCAG-----  
-TGCGCAACACAGTCTCTTCGCATCTGC---AGCGGGAAGTTT---T---  
---GCAGGGCCACATGGACACTCAGATGCCGCTGGACACCTGCTCTTCCC  
AGGACTTCACGAG---CAAGCTGCGAGCCATGCGTCCCTCAAATGTTGTTA  
ACAGTCAGATGCGGTTGGGCTTTTCAGGGGACATGTACGGGCGGGCCGAC  
CAGTATGGCCACGTTACTAGCCCCGGT---CCGACCACTATGCTTTCGAC  
CCAGTTGCATGGCTACGGCCCTATGAACATGAATATGGCCGCA---CATC  
ATGGAGCAGGGGCTTCTTCCGTTACATGAGGCAGCCGATAAAAAAAGAG  
CTGATCTGCAAGTTGATCGAACCAGAGCAACTTACGAATCCGAAAAAGTC  
GTGCAAAAAACTTTTAGCACGATGCACGAGCTGGTGAACCATTTGACGG  
TGGAGCATGTGGGGGGACCAGAGCAGTCGAACCATATTTGCTTCTGGGAA  
GAGTGTGCCCGAGAAGGAAAACCATTCAAAGCCAAATACAAACTTGTGAA

CCACATCAGAGTGCACACCGGGGAGAAACCGTTTCATGTCCTTCCCNGG  
CTTATGCTCG

>Diretmichthys parini

-----  
-----  
-----  
-----  
-----  
-----  
-----  
-----  
-----  
-----  
-----  
-----  
-----  
-----

NNNNNNNNNNNNNNNNNNNNNNNNNNTAATTGCCTGGGCATGCNGTTGCTGTCTGATGCACACCA  
GTGTACCAAGCTATCAGAGCTCTCCTGGGGCATGTGCNTCAGCAACTTTCC  
TGCTATTTGCAAGACAGAGGACTTCCCTCCAAGTGCCTAAGACATGGTGG  
TGCAGCTTCTATCCCACGAGGAGCTGGAGACAGAAGATGAGAGANTGGTTT  
ATGAAGCTGCCCTTAAC TGGGTCAACTATGACCTGGAAAGGAGGCAGCTGC  
CATCTGCCAGAGCTGCTGAGAACGGTTTCGCCTGGCCCTGCTACCTGCCAT  
CTTCCATCATGGAGAATGTCTCGACAGAAGAGCTGATCAATGCCCAAGCCA  
AGAGCAAGGAGCTGGTGGATGAGGCCATACGCTGCAAGCTGAAGATCTTG  
CAGAATGACGGTGTGGTTAAACAGCCCTGTGCTCGGCCGAGAAAAACCAG  
CCATGCCCTTTTTCTGCTGGGAGGGCAGACCTTCATGTGTGACAAGCTGT  
ACCTGGTGGACCAGAAGGCGAAAGAGATCATCCCCAAGGCTGACATCCCC  
AGCCCTAGGAAGGAGTTCAGTGCCTGTGCCATTGGCTGTAAGGTCTACAT  
CACAGGTGGCA--GAGGCTC-AGAAAATGGTGTGTCTAAAGANGTATGGGT  
CTATGACACCGTCCAAGAAGAATGGTCCAAGGCAGCACCCATGCTCATCG  
CCAGATTTGGTCATGGCTCTGCTGANCTGAAACTGCCTTTACGTAGTANG  
ANGTCACACAGCAGCAACTGGCTGCCTCCCAGCCTCTCCCTCCGGATCACT  
ACATTGTAGTGTTCAGCCGTTCAACAACGAGGCTGATTCTGAATGAAGCG  
GAGCTAATCATGACGCTGGCCCAGGAATTTTCAGATGAGAGTGGTCACGGT  
GTCCTTGAGGAACAAAAGTTCCCCAGCATCGCCCAGGTGATCAGCGGGG  
CCTCCATGCTAGTCAGTATGCATGGAGCTCAGCTCGTCACCTCACTCTTC  
CTCCCAGAGGAGCTGCTGTGGTGGARCTGTTCCCCTACGCTGTTAACCC  
AGAACAGTACACCCCATATAAAAACCTCGCCACCTACCAGGCATGGACC  
TTCAGTATGTTTCCCTGGAGGAACACTATAGAGGAGAACACTGTCACCCAC  
CCAGACAGACACTGGGAACAAGGAGGCATCGCCATTTGGAAAAGGACGA  
GCAAGAACGAATATTAGCCAGCAAGGATGTCCCCAGACACCTGTGTGCC  
GCAACCCGGAGTGGCTATTTCCGAATCTACCAGGACACTTTGGTGGACATC  
CCTTCATTCCCTGGAGGCCCTCAA---AGAGGGCCTGAAG---ACCAGGCC  
CAGCTTGAAGAA---GGCCAAGCTGGCCAGCACGGTTCATCCGGGCCGGG  
TCAGAGAACCCAGTGCCACACCTCAGTCCAAGCCACCAACGAGGCTAAA  
CTCACAGTTTTCTGGCAGATCCCGTGGAATCTGAAATACCTGAAGGTGAG  
AGAAGTGAAGTACGAGGTG-----AAGAAGGATACTAGCAAGGGAA  
CACTGGAGGATCAAAATCATCCAGGCAAACCCTGCGCTGGAGGCTTTCCGGT  
AATGCCAAAACAATGAGGAATGACAACCTCATCCCGCTTTGGAAAAATTCAT

CCGAATTCATTTTGAACCAGTGGCAAGTTATCCTCTGCTGACGTTGAAA  
CGTACCTATTGGAGAAGTCACGTGTCACCTTTCAGCTCAAGGGTGAGAGA  
AACTATCACATTTTCTTCCAGATATTGTCCAATCAGAARCCAGAGCTATT  
AGACATGATGTTGATCACTAACAACCCATATGACTACTCCTACATCTCCC  
AAGGAGAGGTAACAGTAGCATCCATCAATGACTCAGAGGAGCTGCTGGCC  
ACTGACAGCGCCTTTGATGTGCTTGGCTTCACTCCAGAGGAGAAGATGGG  
ACTATATAAGCTAATTGGTGCCATTATGCACTTTGGCAACATGAAGTTTA  
AGCAGAAGCAGCGTGAGGAGCAGGCTGAGCCTGACGGAACAGAGGCTGCT  
GACAAGTCAGCTTATCTTATGGGGCTGAACTCTGCAGACCTCATCAAAGG  
GCTATGCCATCCCAGAGTCAAGGTAGGAAATGAATATGTCACCAAAGGCC  
AAGGTGTAGACCAAGTCTACTACCCAAACAAGGAAGCCTTCAAGTGTGAG  
GAGTGTGGCAAGCACTACAACACCAAGCTGGGATACAAACGTCATGTGGC  
CATGCACTCTGCCACAGCAGGGGACCTCACCTGTAAAGTGTGCATGCAGA  
GCTATGAGAGCACGCCGGTGCTCCTGGAGCACCTTAAGAGCCACTCGGGG  
AAGTCCCTCGGGTGGCGCAAGGAGAAAAACACCCATGCGACCACTGCGA  
CCGCCGTTTCTACACACGGAAGGATGTGAGACGGCACATGGTGGTCCACA  
CGGGCCGAAAAGACTTCTGTGCCAGTACTGTGCCAGCGCTTTGGCAGG  
AAGGACCACCTGACACGCCACGTAAAGAAGAGCCACTCGCAGGAGCTGCT  
GAAGATCAAGACAGAGCCTCCAGATATGTTAGGTCTTCTAGGTTCTGGCT  
CGCCACCTTGCTCAGTGAAGGAGGAGCTTAGCCCTATGATGTGCAGCATG  
GGTCCCAACAAGACCCCATGATGGGCAAACCTTCCCCAGTGGGACCC  
CTTCCCCATAGGCATGTACAACCCCCACCAC-----CTCCAGGCCATGT  
CCAATTCTGGGGTGGGTCACCC-----CACCCCTCCCTGATGCCTAGC  
CCCCGTCTGCAGCTATGGGCATGGGCTGTACATGGAATATCTCATCTA  
TGCCCTTTTCTCATTCATGGGATGTTTACAAATCAGTGATGGTTCAAACA  
TCGTGAACTTGCTGGCTAGTAACTCTCCGAGCGTTTCATATGCTCTGACC  
CAGCAGAAATACTTCACTAAGTACAGTCCCGTGATTGGGTTTTACATTTA  
CGAGCCATTGAGTACTGGAAGTCCACAGTGCAGGAGCACCTGAAGACAC  
TGAGTCACGGCTTCAACAAGATCTCCTGGATGGACAACCTTCTTCCACTAC  
CTGCGGGTGGTGAACGTGAGTGTCTCGACCAAGAGTGACTTTATCACCAT  
CCTCAAGGGCTCTTTCCCTGCGCAGCCCGGAGTACCAGCACTTCACTGAGG  
ACATCATCTTCTCCAAGA---ACCCTGAGAGTG-----ATGAGTATGAC  
ATTATCGCCTCAGCATGTACCTAGTGGCACGGACCACAGAGAAGAAGCG  
CGAGGAGGTGGTGGAGCTTCTGGAGAACTGCGTCCACTGATGCTGATCA  
ATAGCATCAAGTTCAATCGCCTTCAACCCACCTTTGTTTTTCATGGACCGC  
TACAGCTCCTCAGTCATCTCGCCATCCTGACCTCAGGCTTCAGYGTGCT  
CACCATCCTCATCCTCACTTTCTTCTGGTCAATCAACCCCTTGGGGAAC  
TCTGGCTCATCCTTACAGTTACCTCTGTGGAGCTGGGCGTCTTGGGTTTA  
ATGGGCTATCATCTATTCGAATGGCAGCCAGCTCTCAAGAATGTGTCTAC  
ATCCTGCCATGTGAGCATTATTAATGGGCTCTCTGGATGGGCTGCCCTGG  
TGGATGACTCCCCAGCTGACACCACTACTCGACGGTTTCGCTATGACGTG  
GCCCTGGTATCAGCCTTAAAGGATCTGGAGGAGCACATCATGGAGGGACT  
GAGAGAGTGTGGGCTGGAAGACAGTGCTTGCACCTCAGGGTTCAGTGTA  
TGATCAAGGAATCTTGTGACGGCATGGGAGATGTCAGCGAGAAGCACGGG  
GGAGGGCCAATGGTCCCCGAGAAGGCTGTACGCTTCTCTTTTACTGTTAT  
GTCTGTCTCTGTCTGGCAGATGGAGAGGAA-----  
-----GAGGCGGTTACCATCTTTAGCGAGCCAAAGCCCAACTCA  
GAACTGTCCTGTAAGCCCCTATGCCTGATGTTTGTGGATGAGTCAGACCA  
TGAGACAGTCACTGCTGTCTGGGACCTGTAGTTGCAGAGCGTAATGCAA  
TGAAGCAGAGTCAACTCATCCTATCTATGGGTGGCCTCCCTCGCTCCTTC  
CGCTTCCACTTCAAGAGCCACAGGATATGATGAGAAGATGGTGGCTGAGAT  
GGAGGGCCTGGAAGCCTCGGGTTCACCTATATCTGCACTCTGTGTGATT  
CCAGTCGAGCAGACGCCTCTCAAAATATGGTGCTACTCCATCACCCGC

AGCCAYGATGAGAACCTGGAGCGTTATGAATTATGGAGGACCAATCCCTA  
TTCTGAGTCTGCTGACGAGCTGCGAGACCGGGTCAAAGGGGTCTCTGCCA  
AGCCCTTTATGGAGACCCAGCCCCTATGGATGCATTACACTGTGACATT  
GGTAATGCCACTGAGTTCTACAAAATCTTCCAGGATGAGATTGGGGAGGT  
GTACCGGAAGGC---CAAT---CCCAGCCGTGAGGAACGGCGGAGCTGGA  
GAGCAGCCCTAGACAAGCACCTGAGGAAGAAGATGAAGCTTAAACCAGTG  
ATGAGGATGAATGGGAACCTTGGCCGGAAGCTAATGACCCAGGAAGCTGT  
GGAGGTGGTGTGTGAGCTGGTGCCTTCAGAAGAGAGGGCGAGAGGCCCTGA  
GGGAGCTTATGGGGCTCTACATCCAGATGAAGCCTGTGTGGCGTGCCACC  
TGCCAGCCAAGGAATGCCCTGACGAGCTGTGCCGCTACAGCTTTAACTC  
CCAGCACTTTGCCGATCTCCTCTCCAGTACCTTCAAATATAGGTACAATG  
GAAAGATCACCAATTACCTGCATAAGACCCTCGCCCATGTCCCTGAAATC  
ATTGAAAGAGATGGCTCTATAGGAGCCTGGGCCAGTGAGGGGAATGAGTC  
AGCAAACAAATCGTACACCATCGAGATGGGTCCCAAGGGGCCCCAGTGGA  
AGGAGAGTCCCTCAGCCTTTCTCCTGCTCCATTGAAGACCCACGAAACAG  
ACCAAGTTCAAAGGCATCAAGACCTACATTTTCGTACCGGGTCACGCCGAG  
CCACATAGATCGTCCCGTCTACAGGCGCTACAAACACTTTGACTGGTTGT  
ATAACCGCTTGCTGCACAAGTTCACTGTGATCTCGGTGCCCCACCTGCCT  
GAAAAGCAGGCCACGGGGCGCTTCGAGGAGGACTTCATCGAGAAGCGTAA  
AAGACGACTGATTCTGTGGATGAACCACATGACCAGTCACCCGGTTCTCT  
CCCAGTACGAGGGATTTGAGCACTTCCTTATGTGTGCCGATGACAAGCAA  
TGGAAGCTGGGTAAAGAGGCGGGCGGAGAAGGACGAGATGGTGGGCGCCCA  
CTTCATGTTGACCTTCCAGATCCCTAACGAGCATCAGGACCTCCAGGATG  
TGGAGGAGCGGGTCGACTCCTTCAAGTCCTTCGCTAAGAAAATGGATGAC  
AGCGTCATGCAGCTCACGCACGTTGCCTCGGAGCTGGTGCGTAAACACCT  
GGGTGGATTTCAGGAAGGAGTTCCAGCGGCTAGGAAACGCCTTCCAGTCCA  
TCAGCCAGGCCTTCATGCTGGAACCCCCCACAGCTCTGAGGCGCTCAAC  
AACGCCATCTCCCACNNNNNNNNNCGTTCCTCAAACCTGACCTCTCTGGGTTTCATCATT  
GGAGTCGGTGTGGTCGTAACCTGCTGATCTCCATCCTGCTGGTCAAAGA  
CAAGAGCCTGCACCGTGCACCCTATTACTTCCTGCTAGACCTCTGCGCCT  
CCGACATCCTGCGCTCTGCCATCTGCTTCCCCTTCGTCTTACCTCTGTCT  
AAGAATGGATCCGCTTGACCTACGGCACGCTCACCTGCAAAGTGATCGC  
CTTCTGGGCGTGCTCTCCTGTTTCCACACGGCGTTCATGCTATTCTGCG  
TCAGCGTCACTCGCTACCTGGCTATCGCGCATCACCGCTTCTACACCAA  
AGGCTGACCTTCTGGACCTGTCTAGCCGTCATCTGCATGGTGTGGACGTT  
GTCAGTAGCCATGGCGTTCACCCCGGTGCTGGACGTAGGGACGTACTCCT  
TCATCCGGGAGGAGGACCAGTGCACATTCCAGCACCGTTCCTTTCAGGGCC  
AATGACTCACTGGGCTTCATGCTCCTGCTGGCGCTCATCCTCCTCGCCAC  
ACAGCTGGTTTACCTCAAGCTTATCTTCTTTGTCCACGACCGTCGGAAGA  
TGAAGCCCGTCCAGTTCGTGCCTGCCGTCAGCCAGAACTGGACCTTCCAC  
GGGCCGGGCGCCAGCGGGCAGGCGGCGGCTAACTGGCTCGCTGGATTTGG  
GAGAGGCCCCACCCCGCCTACCTTGTGGGCATCCGGCAGAACAGCAACG  
CGGCGGGCCGACGGCGTCTGCTGGTGGTGGATGAGTTCAAACGGGAGAAG  
AGGATTAGTAGGATGTTCTACATCATGACGTTTTTCTTCCCTGGCGTTGTG  
GGGGCCCTACCTGGTGCCTGCTACTGGCGGGTGTGTTGCAAGGGGCCCCG  
TAGTTCGCGGAGGATACCTGACGGCGGCGGTGTGGATGAGCTTTGCCAG  
GCTGGGGTCAATCCCTTCATCTGCATCTTCTCTAACNNNNNN-----  
-----  
-----  
-----  
-----  
-----  
-----



GCCCCGTGTGCTCGGCYGAGAAAAACCAGCCATGCCCTTTTTCTGCTKGGA  
GGGCAGACCTTCATGTGTGACAAGCTGTACCTGGTGGACCAGAAGGCGAA  
AGAGATCATCCCCAAAGCTGACATCCCCAGCCCTAGGAAGGAGTTCAGTG  
CCTGCGCCATTGGCTGTAAGGTCTACATCACAGGTGGCA--GAGGCTC-A  
GAAAATGGTGTGTCTAAAGACGTATGGGTCTATGACACCGTCCACAAGGA  
ATGGTCCAAGGCAGCACCCATGCTCATCGCCAGATTTGGTTCATGGCTCTG  
CTGANCTGAAACACTGCCTTTANNNNNNNNNNNNNNNNNNNNNNNNNNNNN  
NNNNGGATCACTACATTGTAGTGTTCAGCCGTT  
CAACAACGAGGCTGATYCTGAACGAAGCGGAGCTAATCATGACGCTGGCC  
CAGGAATTTTCAGATGAGAGTRGTCACGGTGTCCCTGGAGGAACAAACGTT  
CCCCAGCATTGCCAGGTGATCAGCGGGGCCTCCATGCTAGTCAGCATGC  
ATGGAGCTCAGCTTGTACCTCACTCTTCCTCCCCAGGGGAGCTGCTGTG  
GTGGAGCTGTTCCCTACGCTGTTAACCAGAGCAGTACACCCCATATAA  
AACCTTGCCACCCTACCAGGCATGGACCTTCAGTATGTTTCCTGGAGGA  
ACAGTATAGAGGAGAACACTGTCACCCACCCAGACAGACCCTGGGAAGAA  
GGAGGCATCGCCCATTTGGAAAAGGACGAGCAAGAACGAATACTAGCCAG  
CAAGGATGTCCCCAGACACCTGTGCTGCCGCAACCCGGAGTGGCTATTCC  
GAATCTACCAGGACACTTTGGTGGACATCCCTTCATTCCTGGAGGCCCTC  
AA---AGAGGGCCTGAAG---ACCAGGCCAGCTTGAAGAA---GGCCAA  
GCTGGCCAGCACGGTTCATCCGGGCCGGGTTCAGAGAACCCAGTGCCACA  
CCTCAGTCCAAGCCACCAACGAGGCTAAACTCACGGTTTTCTGGCAGATC  
CCGTGGAATCTGAAATACCTGAAGGTGAGAGAAGTGAAGTACGAGGTGTG  
GATCCAGAAGAAGGATTTCTAGCAAGGGAACACTGGAGGATCAAATCATCC  
AGGCCAAACCCTGCGCTGGAGGCTTTCGGTAATGCCAAAACAATGAGGAAT  
GACAACCTCGTCCCGCTTTGGAAAATTCATCCGAATTCATTTCCGAACCAG  
TGGCAAGCTGTCCCTCTGCTGACATTGAAACGTACCTATTGGAGAAGTCAC  
GTGTCACTTTTTCAGCTCAAGGGTGAGAGAACTATCACATTTTCTTCCAG  
ATATTGTCTAATCAGAAGCCAGAGCTATTAGACATGATGTTGATCACTAA  
CAACCCATATGACTACTCCTACATCTCCCAAGGAGAGGTAACAGTAGCAT  
CCATCAACGACTCAGAGGAGCTGTTGGCCACTGACAGCGCCTTTGACGTG  
CTTGGCTTCACTCCAGAGGAGAAGATGGGACTMTATAAGCTGATTGGTGC  
CATTATGCACTTTGGCAACATGAAGTTTAAGCAGAAGCAGCGTGAGGAGC  
AGGCTGAGCCTGACGGAACAGAGGCTGCTGACAAGTCAGCTTATCTTATG  
GGGCTGAACTCTGCAGACCTCATCAAAGGGCTATGCCATCCAGAGTCAA  
GGTAGGAAATGAATATGTACCAAAGGCCAAGGTGTAGACCAAGTCTACT  
ACCCAAACAAGGAAGCCTTCAAGTGCAGGAGTGTGGCAAGCACTACAAC  
ACCAAGCTGGGATACAAACGCCATGTGGCCATGCACTCTGCCACAGCAGG  
GGACCTCACCTGTAAAGTGTGCATGCAGAGCTATGAGAGCACGCCGGTGC  
TCCTGGAGCACCTTAAGAGCCACTCGGGGAAGTCTCGGGTGGCGCCAAG  
GAGAAAAAACACCCATGCGACCACTGCGACCGCCGTTTCTACACACGGAA  
GGATGTGAGACGGCACATGGTGGTCCACACGGGCCGAAAGGACTTCCTGT  
GCCAGTACTGTGCCCAGCGCTTTGGCAGGAAGGACCACCTGACACGCCAC  
GTAAAGAAGAGCCACTCGCAGGAGCTGCTGAAGATCAAGACAGAGCCTCC  
AGATATGTTAGGTCTTCTAGGTTCTGGCTCGCCACCTTGCTCAGTGAAGG  
AGGAGCTTAGCCCTATGATGTGCAGCATGGGTCCCAACAAAGACCCCATG  
ATGGGCAAACCCTTCCCAGTGGGACCCCTTCCCATGGGCATGTACAA  
CCCCATCAC-----CTCCAGGCCATGTCCAATTCGGGGTGGGTCACC  
CC-----CACCCCTCCCTGATGCCTAGCCCCCTGTCTGCAGCTATGGGC  
ATGGGCTGTACATGGAATATCTCATCTATGCCTCTTCTCATTCATGGG  
ATGTTTACAAATCAGTGATGGTTCAAACATCGTGAACCTGCTGGCTAGTA  
ACTCTCCGAGCGTTTCATATGCTCTGACCCAGCAGAAATANTTCAGTAACT  
ACAGTCCCTGTGATTGGGTTTTACATTTATGANCCCATTGAGTACTGGAAC  
CCACAGTGCAGGAGCACCTGAAGACACTGAGTCATGGCTTCAACAAGATC



TCCTGGATGGACAACCTTCTTCCACTACCTGCGGGTGGTGAACGTGAGTGC  
TTCGACCAAGAGTGACTTTATCACCATCCTCAAGGGCTCTTTCTGCGCA  
GCCCCGAGTACCAGCACTTCACTGAGGACATCATCTTCTCCAAGA---AC  
CCTGAGAGTG-----ATGAGTATGACATTATCGCCTCACGCATGTACCT  
AGTGGCACGGACCACAGAGAAGAAGCGCGAGGAGGTGGTGGAGCTTCTGG  
AGAAATGCGTCCACTGATGCTGATCAATAGCATCAAGTTCATCGCTTTC  
AACCCACCTTTGTTTTTCATGGACCGCTACAGCTCCTCAGTCATCTCGCC  
CATCCTGACCTCAGGCTTCAGCGTGCTACCATCCTCATCCTCACTTTCT  
TCCTGGTCATCAACCCCTTGGGGAACCTTGGCTCATCCTTACAGTTACC  
TCTGTGGAGCTGGGCNNNNNNNNNNNNNNNNNNNNNNNNNNNNNNNNNNNN  
NNNNNNNNNNNTGCCATGTGGGCATTATTAATGGGCTCTCTGGATG  
GGCTGCCCTTGGTGGATGACTCCCCAGCTGACACCATTACTCGACGGTTCC  
GCTATGACGTGGCCCTGGTGTGAGCCTTAAAGGATCTGGAGGAGCACATC  
ATGGACGGACTGAGAGAGTGTGGGCTGGAAGACAGTGCTTGACCTCAGG  
GTTTCAGTGTAATGATCAAGGAATCTTGTGATGGCATGGGAGATGTCAGCG  
AGAAGCACGGGGGAGGGCCAGTGGTCCCCGAGAAGGCTGTACGCTTCTCT  
TTTACTGTTATGTCTGTCTCTGTCTTGGCAGATGGAGAGGAA-----  
-----GAGGCGGTTACCATCTTTAGCGAGCCAA  
AGCCCAACTCAGAAGTGTCTGTAAAGCCCCTATGCCTGATGTTTGTGGAT  
GAGTCAGACCATGAGACAGTCACTGCTGTCTGGGACCTGTAGTTGCAGA  
GCGTAGTGCAATGAAGCAGAGTCAACTCATCCTATCTATGGGTGGCCTCC  
CTCGCTCCTTTTCGCTTCCACTTCAGAGCCACAGGATATGATGAGAAGATG  
GTGCGTGAGATGGAGGGCCTGGAGGCCTCGGGTTCACCTATATCTGCAC  
TCTGTGTGATTCCAGTCGAGCAGACGCCTCTCACAATATGGTGTACTACT  
CCATCACCCGCAGCCACGATGAGAACCCTGGAGCGTTATGAATTATGGAGG  
ACCAATCCCTTTTCTGAGTCTGCCGACGAGCTGCGAGACCGGGTCAAAGG  
GGTCTCTGCCAAGCCCTTTATGGAGACCCAGCCACTATGGATGCATTAC  
ACTGTGACATTGGTAATGCCACTGAGTTCTACAAAATCTTCCAGGATGAG  
ATTGGGGAGGTGTACCGBAAGGC---CAAC---CCCAGCCGCGAGGAACG  
GCGGAGCTGGAGAGCAGCCYTAGACAAGCACCTGAGGAAGAAGATGAAGC  
TTAAACCAGTGATGAGGATGAATGGGAACCTACGCCCGGAAGCTAATGACC  
CAGGAAGCCGTGGAGGTGGTGTGTGAGCTGGTGCCCTCAGAAGAGAGGCG  
AGAGGCCTTGAGGGAGCTTATGGGGCTCTACCTCCNNNNNNNNNNNNNNNN  
NNNNNNNNNNNNNNNNNNNNNNNNNNNNNNNNNNNNNNNNNNNNNNNNNN  
NNNNNNNNNNNNNNNNNNNNNNNNNNNNNNNNNNNNNNNNNNNNNNNNNN  
NNNNNNNNNNNNNNNNNNNNNNNNNNNNNNNNNNNNNNNNNNNNNTCGTACACC  
ATCGAG  
ATGGGTCCCAAGGGGCCCCAGTGGAAAGGAGAGTCCTCAGCCTTTCTCCTG  
CTCCATGAAGACCCACGAAACAGACCAAGTTCAAAGGCATCAAGACCT  
ACATCTCRTACCGGGTYACGTGAGCCACATAGATCGTCCCGTCTACAGG  
CGCTACAAACACTTTGACTGGTTGTATAACCGCTTGCTGCACAAGTTCAC  
TGTGATCTCGGTGCCCCACCTGCCYGAAAAGCAGGCCACGGGGCGCTTCG  
AGGAGGACTTCATCGAGAAGCGTAAAAGACGACTGATTCTGTGGATGAAC  
CACATGACCAGTCACCCGGTTCTCTCCCAGTAYGAGGGATTTGAGCACTT  
CCTTATGTGTGCCGACGACAARCAATGGAAGCTGGGTAAGAGGCGGGCGG  
AGAAGGAYGAGATGGTGGGYGCCACTTCATGTTGACCTTCAGATCCCT  
AATGAGCATCAGGACCTCCAGGATGTGGAGGAGCGGGTCCACTCCTCAA  
GTCYTTTCGCTAAGAAAATGGACGACAGCGTCATGCAGCTCACGCACGTTG  
CCTCGGAGCTGGTGCCTAAACACCTGGGTGGATTCAGGAAGGAGTCCAG  
CGGCTAGGGAATGCCCTCCAGTCCATCAGCCAGGCCTTCATGCTGGAACC  
CCCCACAGCTCTGAGGCGCTCAACAACGCCATCTCCCACNNNNNNNNNNCATTCCCTCAA  
ACTGACCTCTCTGGGTTTCATCATCGGAGTCCGTGTGGTCCGGGAACCTGC  
TGATCTCCATACTGCTGGTCAAAGACAAGAGCCTGCACCGCGGCCCTAT



TTTTATGGTCATACCGATTATAATTGGAGGCTTCGGAACTGACTCATCC  
CCCTCATGATCGGAGCCCCGACATGGCTTTCGCCGAATAAATAATATG  
AGTTTCTGGCTCCTTCCCTCCTTCCCTACTACTACTAGCTTCTTCAGG  
TGTAGAAGCCGGGGCGGGAACCGGCTGGACCGTCTATCCCCCTCTCTG  
GAACTTAGCCACGCAGGTGCATCCGTTGACCTAACTATTTTTTCTCTG  
CATTTAGCAGGCATTTCTTCCATCTTAGGTGCAATTAATTTTATCACAAC  
AATTATTAACATGAAACCCCCCTGCCATCTCTCAATACCAAACCCCTCTGT  
TCGTATGGGCCGTCTAATTACTGCCGTCTTCTACTTCTTTCACTTCCT  
GTGCTAGCTGCCGGAATTACCATGCTTCTCACGGACCGAAACCTCAACAC  
CACCTTCTTTGACCTGCAGGAGGGGGAGACCCTATTCTTTACCAACATC  
TTTTTC-----  
-----  
-----  
-----  
-----TTCCTGGAGAGAAACCTGCACCCGTCTAACTGCCTTGGC  
ATGCTGTTGCTGTCTGACGCCACCAGTGCATCAAGCTGTCAGAGCTCTC  
CTGGGGAATGTGCCTCAGCAACTTTCCTACTATTTGCAAGACAGAGGACT  
TCCTCCAACCTGCCCAAAGATATGGTGGTGCAGCTTTTGTCCCATGAGGAG  
CTAGAGACAGAAGATGAGAGACTGGTCTATGAGGCGGCCCTTAACTGGAT  
CAACTACGACCTGAAAAAGAGGCACTGCCACCTTCCAGATCTCCTGAGAA  
CGGTCCGCCTGGCCCTGCTGCCCGCCATCTTCTCATGGAGAACGTTTCT  
ACAGAAGAGCTGATCAACGCCCAGCCTAAGAGCAAGGAGCTGGTGGATGA  
AGCTATCCGCTGTAAGCTGAAGATCCTGCAGAACGATGGCGTGGTTAACA  
GCCCTTGTGCCCGACCAAGGAAGACCAGCCATGCCCTCTTCTTCTGGGA  
GGGCAGACTTTTCATGTGTGACAAGTTGTACCTGGTGGACCAGAAAAGCCAA  
AGAGATCATCCCCAAGTCTGACATCCCCAGCCCCAGGAAGGAGTTCAGCG  
CCTGCGCCATTGGCTGTAATGTGTACATCACCGGTGGCA--GAGGTTCA--A  
GAGAATGGTGTATCCAAAGATGTGTGGGTCTATGACACCGTCCAAGAGGA  
ATGGTCAAGGCGGCACCCATGCTCATTGCCAGGTTTGGCCATGGCTCTG  
CGGAGCTGAAACACTNNNNNNNNNNNNNNNNNNNNNNNNNNNNNNNNNNNNNN  
NNNNGGATGAATACATTGTACTGTTTAGTCGTTCAACAA  
CACGGCTGATACTGAACGAGGCGGAGCTGATCATGGCGCTGGTCCAGGAG  
TTCCAGATGAGAGTGGTCCACAGTATCCCTAGAGGAACAGTCTCTCCCCAG  
TACCGTCCAGGTGATCAGTGGGGCTTCCATGTTAATCAGTATGCATGGAG  
CTCAGCTAATCACCTCACTCTTCCCTCCCTAGAGGAGCTGTTGTGGTGGAG  
TTGTTCCCTTTTGTCTGTTAACCCCTGAACAGTACACCCCGTATAAAACCCT  
TGCCACCCCTTCCAGGCATGGATCTTCACTATATCTCTTGGAGGAACACCA  
AGGAGGAGAACACCATCACCCACCCAGATAAACCTTGGGATCAAGGGGGC  
ATTACTCACTTGGAGAAGGAGGAGCAAGAGCGAATCCTGGCGAGCAAAGA  
TGTGCCCAGGCACCTGTGCTGTGCAACCCGGAGTGGCTCTTCCGGATCT  
ACCAGGACACTTTGGTGGACATCCCTTCCTTCTTGGAAAGTCCCTAA---A  
GAGGGAAATGAAG---ACAAAGCCCAGTGTGAGAAG---ATCCAAACCGGC  
CAGCACAGTTCATCCGGGCCGGGTGAGAGAACCCAGTGTGACACCTCGG  
TACAAACCACTAATGAGGCTAAACTCACAGTCTCTGGCAGATCCCCTGG  
AATCTGAAATACCTGAAAGTGAAGAGAGTTGAAGTACGAGGTGTGGATCCA  
GAAAAGAGACCCAGCAAGGGCACGCTGGAGGACCAAATCATCCAGGCCA  
ACCCCGCACTGGAGGCTTTCGGCAACGCCAAGACGCTGAGAAAACGACAAC  
TCCTCTCGTTTTTGGAAAATTCATCCGAATCACTTGGGACGAGCGGCAA  
GTTGTGCTCTGCTGACGTCGAGACGTACCTGCTGGAGAAGTCCCGCTGCA  
CCTTTCAGCTCAAGGCTGAGAGGAACCTACCACATCTTCTACCAGATCCTG  
TCCAACCAGAAGCCAGAGCTCCTGGACTTGCTGCTGATCACCACAACCC  
GTACGATTACGCCTACATCTCCAAGGAGAGGTAACCGTCGCCTCCATCA  
ACGACGCAGAGGAGCTGATGGCCACCGACAGCGCTTTCGACGTGCTCGGC

TTTACTGCGGAAGAGAAGATGGGCGTCTACAAGCTAACAGGCGCCATCAT  
GCACTACGGCAACATGAGGTTCAAACAGAAGCAGCGGAGGAGCAGGCTG  
AGTCGGACGGGACGGAGGCGGCAGATAAATCTGCGTACCTGATGGGGCTG  
AACTCTGCCGACCTCATCAAAGGGCTGTGCCATCCAGAGTCAAGGTAGG  
AAACGAATACGTCACCAAAGGCCAAAGTGTGGACCAAGTCTACTACCCCA  
ACAAGGAGGCCTTCAAGTGTGAGGAGTGTGGGAAGCACTACAACACCAAG  
CTGGGGTACAAGCGCCATGTGGCCATGCACTCTGCCACGGCGGGGGATCT  
CACCTGTAAAGTGTGCATGCAGAGCTACGAGAGCACCCCGTTCTGTGG  
AGCACCTCAAAGCCACTCCGGGAAGTCTTCAGGCGGCACCAAGGAGAAG  
AAGCACCCGTGTGATCACTGTGACCGTCGTTCTACACCCGGAAGGACGT  
GAGACGGCACATGGTGGTGCACACGGGCCGAAAGGACTTCCTCTGCCAGT  
ACTGTGCCCAGCGCTTCGGCAGGAAGGACCACCTGACCCGACACGTGAAG  
AAGAGCCACTCTCAGGAGCTGCTGAGGATCAAGACGGAGCCCCCTGACAT  
GTTGGGTCTTTTAGCCTCTGGGTCTCCACCCTGCTCTGTGAAGGAGGAGC  
TCAGCCCCATGATGTGCGGCATGGGGCCCAACAAAGACCCCATGATGGGC  
AAACCGTTCTCCGGTGGGGCCCCCTTTTTCAATGGGCATGTACAACCCCA  
CCAT-----CTCCAGACCATGTCTAATACTGGGGGGGGTACCCCT----  
--CACCCGTCCCTGATGCCCAGTCCGTTGTCTGCAGCTATGGGCATGGGG  
TGTCACATGGAATATCTCATCTACGCATCTTTCTCATTCATGGGATGTTT  
ACAAATCAGTGATCGATCAAATATTTGTGAACCTGCTGGCGAGTAACTCTC  
CGAGTGTTCGTATGCCCTGACCCAGCAGAAATACTTCAGTAACTACAGT  
CCCGTGATTGGGTTTTACATTTACGAACCCATCGAGTACTGGAATTCCAC  
GGTGCAGGAGCACCTGAAGACTTTGAGTCATGGCTTCAACAAGATCTCTT  
GGATGGACAACTTTTCCACTACCTGCGGGTGGTGAATGTGAGTGCCTCA  
ACTAAGGGTGACTTCATCACAATCCTCAAGGGCTCCTTTCTGCGCAGCC  
TGAGTACCAGCACTTCTCTGAGGACATCATATTCTCCAAGA---ACCGTG  
AGACCG-----ATGAGTACGACATCATCGCCTCTCGGATGTATTTGGTT  
GCCCCGACGACGGAGAAGAAGCGAGGGGAGGTGGTGGAGCTTCTGGAGAA  
GCTTCGTCCGTTGATGCTGATCAACAGCATCAAGTTCATTGCCTTCAATC  
CTACGTTTGTGTTTATGGACCGCTACAGCTCCTCTGTCATCTCGCCTATC  
CTGACCTCAGGCTTCAGCGTACTCACAATCCTCATCCTCACTTTCTTCCT  
GGTCATCAACCCCTTGGGTAACCTTCTGGCTCATCCTCACAGTAACGTCCG  
TCGAGCTGGGCGTCTTGGGTTTTGATGGGCTTCTCAGTTTTGAATGGCAG  
CCAGCTCTCAAGAAATGTGTCTACATCTTGCAATGTTGGCATTATTAACGG  
GCTCTCTGGATGGACTTCCTCGGTGGATGACTTCCAGCTGACACCATCA  
CTCGCCGTTTTCGCTACGATGTGGCTCTGGTGTGAGCATTAAAGGATCTG  
GAGGAGGACATCATGGAGGTCTCAGAGAGGCTGGTATGGAAGACAGTAC  
TTGTATCTCAGGCTTCAGTGTCAAGATCAAAGAAATCCTGTGATGGCATGG  
GCGATGTCAGTGAGAAACATGGCGGGGGACCAGCTGTCCCTGAGAAGGCT  
GTTTCGTTTTTCTTTTACTGTCTGTCTGTCTGTCAAGCCAGACAACGA  
GGAG-----AAGGAGGTTACCATTT  
TCACTGAGCCCAAGCCGAACCTCAGAACTGTGATGTAAGCCCCTTTGCCTG  
ATGTTTGTGGATGAGTCAGACCATGAGACACTCACAGCTGTCCCTGGGGCC  
TGTAGTTGCCGAGCGTAAGGCAATGAAGGAGAGCAAGCTCATCCTATCCT  
TGGGTGGACTAGCTCGTCTCCTTCCGATTCCACTTCAGAGGTACAGGATAC  
GATGAGAAGATGGTGCCTGAGATGGAGGGCCTTGAAGCCTCTGGGTCCAC  
CTATGTCTGCACTCTCTGTGACTCCACCCGGGCAGAGGCCTCTGAAAACA  
TGGTGTACTACTCGGTCACTCGCAGTCATGTAGAGAACTTGGATCGCTAC  
GAGATATGGAGAACCAACCCCTTTTCCGAGTCTGTAGACGAGCTGCGGGA  
CAGAGTCAAAGGTGTCTCCGCCAAGCCGTTTCATGGAGATGCACCCACGC  
TGGATGCGCTACTGTGACATTTGGCAATGCGACAGAGTTCTACAAAATC  
TTCCAGGACGAGATCGGGGAGGTGTACAAAAGGT---CAAC---CCCAG  
TCGGGAGGAGCGGCGCAGCTGGAGGGCAGCCCTGGATAAACAGCTGAGGA

AAAAGCTGAAGGTCAAACCGGTCATGAGGATGAATGGGAACTATGCCCGC  
AGGCTAATGACCCAGGAGGCTGTGGATGTGGTGTGTGAGCTGGTGCCCTC  
AGAGGAGCGGAGGGAAGCCCTCAGGGAGCTTATGAGTATCTACGTCCAGA  
TGAAGCCCGTGTGGCGTGCCACCTGCCCTGCCAAGGAGTGCCCCGACCAG  
CTGTGCCGCTTCAGCTTTAACTCACAGCGCTTTGCAGACCTTCTCTCTTC  
TACCTTCAAATATAGATACAATGGAAAGATAACCAATTATTTGCACAAGA  
CCCTGGCTCATGTGCCTGAAATCATAGAGAGAGATGGATCCATAGGAGCC  
TGGGCCAGCGAAGGGAACGAGTCGGCAAACAAATCATAACCATTGAGAT  
GGGTCAATTGGGGCTGTTTTGGCAGGCGAGCCCAAAGCCTTTCTCCTGCT  
CCGTCGAAGACCCACAAAACAGACAAAGTTCAAGGGTATCAAGACGTAC  
ATTTCTTACCCTGTCACGCCGAGCCACATAGGGCGTGCCGTGTACAGACG  
CTACAAACATTTTACTGGCTGTACAACCGCTTACTGCACAAGTTCACTG  
TGATCTCCGTGCCTCACCTGCCTGAGAAGCAGGCCACGGGGCGATTTGAG  
GAAGACTTCATCGAGAAGCGCAAGAGGCGACTGATACTGTGGATGAACCA  
CATGACCAGTCACCCAGTACTCTCCAGTATGAAGGCTTAGAGCACTTTC  
TAATGTGTACTGATGACAAGCAGTGGAAACTGGGCAAGAGGCGGCAAGAA  
AAGGACGAGATGGTTGGTGCCCATTTTCATGCTGACCC TTCAGATCCCCAA  
CGAGCACCAGGACCTTCAGGATGTAGAGGAGCGCATCGACACCTTCAAGG  
CCTTTGCTAAGAAAATGGATGACAGCGTTTTTGCAGCTCACACATGTTGCT  
TCGGAGCTGGTTTCGTAACACCTGGGTGGGTTTCAGGAAGGAGTTCAGCG  
GCTGGGAAATTCTTTCCAATCTATCAGCCATGCGTTCACGCTGGACCCTC  
CCAACAGCTCAGAGAATCTCAACAAAGCCATCTCCATCCTCTCGCCACG  
TTCTCAAACCTGACCTCTCTGGGTTTCATCATTGGAGTCGGTGTGGTTGG  
AAACCTCCTGATCTCCATCCTGCTGGTCAAAGACAAGAGCCTGCATCGGG  
CGCCCTACTATTTCTGCTGGACCTGTGCGCCTCTGACATCCTGCGCTCC  
GCCATCTGCTTCCCCTTTGTCTTACCTCGGTCAAGAATGGATCGGCCTG  
GACCTACGGCACGCTGACCTGCAAAGTGATCGCCTTCTGGGTGTCCTCT  
CCTGTTTCCACACAGCGTTTTATGCTCTTCTGTGTCAGCGTCACACGCTAC  
CTTGCCATCGCGCACACCCTTTCTACACCAAGAGGCTGACCTTCTGGAC  
CTGTCTGGCTGTGATCTGCATGGTGTGGACGTTGTGAGTGGCTATGGCGT  
TCCCGCCGGTGCTAGACGTAGGGACATACTCTTTTATCCGGGAGGAGGAC  
CAGTGCACGTTCCAGCACCGTTCTTTCAGGGCGAACGACTCGCTGGGCTT  
CATGCTCCTGCTGGCGCTCATCCTCCTGGCCACACAGCTGGTTTACCTCA  
AGCTCATCTTCTCGTGCATGACCGTCGGAAGATGAAGCCTGTCCAGTTC  
GTGCTGTGTCAGCCAGAACTGGACCTTCCACGGGCCTGGCGCCAGCGG  
GCAGGCGGCGGCAACTGGCTGGCCGGATTTCGGTCGAGGCCCAACCCCC  
CTACCTGCTGGGCATCCGGCAGAACAGCAACGCAGCAGGCCCGCAGGCGT  
CTACTGGTATTGGATGAATTCAAAACAGAGAAGAGGATTAGTAGGATGTT  
CTACATCATGACGTTTTTCTTCTTCTGACTGTGGGGGCCCTATCTGGTTCG  
CCTGCTACTGGCGGGTGTTCGAGAGGGGCCAGTGGTCCCTGGGGGCTAC  
CTGACGGCGGCCGTGTGGATGAGCTTCGCCACAGGCCGGGGTCAATCCCTT  
CATCTGCATCTTCTCCAACAGGGAGGCCAAATCTCGCTTTCACCCCTGGCG  
TGGGGACTTGTCTTGGCACGGAGC---GCAGCGTCCACTCGGCAACAGC  
TTGCTGTCCCCGCAGCAAACCGACGAGCCACTGTTGCCACCCCCCGCA  
GCGATGGTTTTGTACCC---CTGCCAACAACCGACTGGACTTTGCTGCCT  
CGGCATACGACGCCGCT-----GATTTCCGCCGGTAACGCGGCCACC  
TTGCTGTCTTACGCAGCGGCCGGAGTGAAGGCTC-----TTCCCCTGCC  
GAGTGGCGGGCTGCTCCAACCGGCTCTTGGCTATTACGCAGACCCGTCAG  
---GCTGG---GGAGGACGCACGCCGCCGAGTACTGTGGCGTAAACAGC  
AAACCCAGCGCGGTCTTTTCTGCTGGCCCGCTAACTCTCTCGGTGGCAG  
GTCGGGCA---CC---AACTACCTGA-----GCGAGGA---GGGA-  
--GACCC---CATCCCAACAGAGAGGTCACCT---AT---CGGCGTCTCC  
GAGGAG---CCCAAAGCCAAAGACATGAC---ATCAGA---GTCGAACTG

GATAGAG---ACGCCGTCCTCCATTAAGTCCATCGACTCGAGCGATTCTG  
GTATCTTTG---AACAGGCCAAAAGGAGGAGAATCTCACCTTCTGCCACG  
CCG-----GTTTCAGAGACAGTGTCCCGTTAAAATCGGAGCATCA  
CTCAACAGGCCGAAGTCACGGAGAGAGAAGTGGCGTTGGGGATCAATCCCT  
TCGCGGATGGGATGGGCGCCTTCAAATCAACCACAGCGCCCACGATATT  
GGCTCCGG---ACAGACGGCGTTCCTCCCAGGCT---CCCGGGTAC--  
-GCAGCCACCGCGCTGGGA---CACCACCA-----CCACCCGAGCCACT  
CTTACTCC-----ACCTTCAACTCCACCAGGGACTTTCTG  
TTCAGAAATCGGGGTTTCGGGGATGCCACCGG-----CGCGCA  
GCACAGTTTGTTCGCCCTC-----CGGAAGTTT---C-----GCAG  
GGCCACATGGACACTCGGATGCGGGCGGGGCACCTGCTCTTCCAGGGGCTC  
CACGAG---CA-G-----AACCACGCGCCCTCCAACGTGGTTAACAGCCA  
GATGCGGCTGGGCTTCACTGGGGACATGTATGGACGTGCAGACCAGTATG  
GCCACGTTACGAGCCCAGGT---CCGACCATTACGCATCATCCCAGCTG  
CACGGCTACGGCCCCATGAACATGAATATGGCCGCG---CACCACGGGGC  
AGGGGCCCTTCTTCCGATACATGAGGCAGCCCATCAAACAGGAGCTCATCT  
GCAAGTGGATCGAGCCGGAGCAGCTGACGAACCCCCAAAAGTCATGCAAC  
AAAACTTTTAGCACCATGCACGAGCTGGTGACCCATCTGACGGTGGAGCA  
TGTGGGGGGGGCCCGAGCAGACCAACCACATCTGCTTCTGGGAGGAATGCG  
TCCGAGAAGGGAAGCCATTCAAAGCCAAATACAAACTTGTGAATCATATC  
AGAGTACACACCGGAGAGAAGCCGTTTCCCTGTCCGTTCCCCGGCTGTGG  
GAAA

>Echeneis naucrates

AGCTTACTCATTTCGGGCAGAACTTAGTCAACCAGGCTCATTATTAGGTGA  
TGATCAGATTTATAATGTTATCGTCACAGCACATGCCTTTGTAATAATTT  
TCTTTATAGTTATAACCAGTAATGATTGGAGGTTTTGGTAATTGATTAGTA  
CCTCTTATAATTGGTGCACCAGACATAGCCTTCCCTCGAATAAATAATAT  
AAGCTTCTGACTACTGCCTCCTTCCCTCCTACTGCTAACATCTTCAG  
GAGTAGAAGCAGGAGCAGGAAGTGGTTGAACTGTTTATCCTCCTTTAGCC  
GGAAACCTTGCCCATGCAGGAGCATCTGTTGACCTAACTATCTTTTCACT  
TCATCTGGCAGGAATTTCCCTCAATCTTGGAGCAATTAATTTTATTACAA  
CAATCATTAATATGAAACCTGCAGCTGCTTCTATATATCAACTCCCATTA  
TTTGTATGAGCCGTATTAATTACAGCAGTTCTTCTCCTATCCCTCCC  
TGTTTTAGCTGCTGGAATTACAATACTACTAACAGACCGTAATCTTAATA  
CCGCCTTCTTTGATCCTGCAGGAGGGGGAGATCCCATCCTTTATCAACAC  
TTATTC-----  
-----  
-----  
-----  
-----  
-----

-----TTCTGGAGAGAAACCTTCACCCCTCTAACTGCCTTGG  
CATGCTGTTGCTGTCCGACGCCCACCAGTGCACCAAGCTGTCGGAGCTCT  
CCTGGGGCATGTGCCTCAGCAACTTCCCTGCCATTTGCAAGACAGAGGAC  
TTCTTCAGCTGCCCAAAGATATGGTGGTCCAGCTTTTATCACACGAGGA  
GCTCGAGACAGAAGACGAGAGACTGGTTTATGAAGCTGCCCTTAACTGGA  
TCAACTATGACCTGGAGAGGAGGCAC TGCCACCTTCCAGAGCTTCTGAGA  
ACGGTCCGCCTCGCCCTGCTGCCCGCCATCTTTCTGATGGAGAACGTCTC  
AACAGAGGAGCTGATCAACGCCAGCCAAAGAGCAAGGAGCTGGTGGACG  
AAGCCATCCGTTGTAAGCTGAAAAATCCTGCAGAACGATGGCGTCGTTAAC  
AGCCCATGTGCTCGACCGAGAAAAACCAGCCATGCCCTTGTTCCTTCTGGG  
AGGGCAGACATTCATGTGTGACAAGTTGTACCTAGTTGACCAGAAGGCCA  
AAGAGATCATACCCAAAGCTGATATCCCGAGCCCCAGAAAGGAGTTCAGT  
GCCTGCGCCATCGGCTGTAAGGTGTACATCACTGGGGGGA--GAGGCTC-  
AGAGAAAYGGTGTGTCCAAAGATGTATGGGTCTACGACACTGTCCACGAGG



TTCTGGAAAAGCTTCGGCCGTTGATGCTAATTAACAGCATCAAGTTCATT  
GCCTTCAATCCCACGTTTGTGTTTCATGGACCGCTACAGCTCCTCTGTCAT  
CTCGCCATCCTGACCTCAGGCTTCAGCGTACTCACTATCCTCATCCTCA  
CTTTCTTCTGCTGGTCAACCCCTTGGGGAACCTTCTGGCTCATCCTCACG  
GTCACTTCTGTGGAGCTGGGCGTCTGGGTTTGTGGGCTTCCACCAGTT  
TGAATGGCAGCCAGCTCTCAAGAATGTGTCAACATCTTGCAATGTTGGCA  
TTATTAATGGGCTTTCAGGCTGGGCTTCCCTCGGTGGATGACTCCCAGCT  
GACACCATCAGTCGGCGCTTTCGCTATGATGTGGCTCTGGTGTGAGCATT  
AAAGGATCTGGAGGAGGACATTATGGAGGGGCTGAGAGAGAGTGGGAGGG  
AGGACAGTGCTTGCACCTCAGGCTTTTCTGTGATGATCAAGGAATGTTGT  
GATGGCATGGGCGACGTCAGCGAGAAGCACGGTGGAGGACCAGCTGTTCC  
TGAGAAGGCTGTACGCTTCTCTTTCACCGTTATGTCTATATCCGTTCCGG  
CAGACGATGATGAG-----GAGGAG  
GTTACCATCTTACCGAACCAAGGCCAAACTCAGAGCTGTCTGTAAAGCC  
CCTCTGCTTGATGTTTGTGATGAGTCAGACCATGAGACGCTCACAGCTC  
TCCTGGGCCCCATAGTTGCAGAGCGTAATGCCATGAAAGAGAGCAGGCTC  
ATTCTGTCCGTCGGCGGCCTGCCTCGCTTCTTCCGCTTCCAATTCAGAGG  
CACAGGATATGATGAGAAGATGGTGCAGAAATTGGAAGGCCTGGAGTCCT  
CGGGGTCAACGTACATCTGTACCTGTGTGACTCGAGTCGGGCAGAGGCC  
TCTAAAAACATGGTGCTGCACGCCATCACCCGCAGCCATGAAGAGAACTT  
AGATCGTTATGAAATATGGAGAACCAATCCCTTCTCCGAGTCTGCGGATG  
AACTGCGGGACAGAGTCAAAGGGGTCTCTGCGAAGCCCTTCATGGAGACG  
CAGCCCACAATGGATGCATTGCACTGTGACATCGGCAACGCCACTGAGTT  
CTACAAAATTTTCCAGGATGAGATTGGTGAAGTGTACCAAAGGT---CA  
GC---CCCAGCCGGGAGGAGAGGGCGCAGCTGGAGGGCGGCCCTGGATAAA  
CAGCTGAGGAAGAAGATGAAACTTAAGCCAGTAATGAGGATGAATGGGAA  
CTACGCCCGCAGGCTAATGACCCAGGAGGCTGTGGAGGTGGTGTGTGAAC  
TGGTGCCCTCAGAGGAGAGGAGGGAGGCCCTGAGGGAGCTCATGAGGCTC  
TACCTCCAGATGAGGCCGGTGTGGCGCGCCACCTGCCAACAAAGGAATG  
TCCAGACCAGCTGTGCCGCTACAGCTTCAACTCCCAGCGCTTTGCCGACC  
TCCTCTCTTCTACCTTCAAATATAGGTACAATGGAAAGATAACCAATTAC  
CTCCACAAGACTCTGGCCCATGTGCCCTGAAATCATAGAGAGAGACGGATC  
CATAGGAGCCTGGGCCAGTGAGGGGAATGAGTCAGCAAACAAATCATACA  
CTATCGAGATGGGTCCTTTGGGACCTCGGTGGAAGGATAACCCGCAACCT  
TTCTCCTGCTCCATTGAAGACCCACAAAACAGACAAAGTTCAAGGGCAT  
CAAGACCTACATTTCTACCGGGTCACGCCGAGCCACACTGGGCGTCCCG  
TCTACAGGCGTTACAAACATTTTGTGATGGCTCTACAACCGCCTACTGCAC  
AAGTTCACGTGTGATCTCTGTGCCTCATCTGCCTGAGAAACAGGCTACGGG  
GCGATTTGAGGAAGACTTTATTGAGAAGCGTAAAAGGAGACTTATACTAT  
GGATGAACCACATGACCAGTCACCCAGTCTCTCCAGTATGAAGGCTTT  
GAACACTTCTGATGTGTGCTGACGACAAGCAGTGGAACCTGGGAAAGAG  
ACGCGCGGAGAAGGATGAGATGGTGGGCGCCATTTTCATGCTGACGCTTC  
AGATCCCAAATGAGCACCAGGACCTTCAGGATGTGAGGAGCGGGTTGAC  
TCCTTCAAGTCTTTGCTAAGAAAATGGACGACAGTGTGATGCAGCTCAC  
CCACGTTGCCTCCGAGCTGGTGCCTAAACACCTGGGTGGGTTTCAGGAAGG  
AGTTCAGCGGCTGGGAAATGCCTTCCAGTCTATCAGCCAGGCGTTCATG  
CTGGACCCTCCTCACAGCTCAGATGCCCTCAACAACGCCATCTCACAT--  
-----  
-----  
-----  
-----  
-----  
-----



-----  
-----  
-----  
-----  
-----  
-----  
-----  
-----  
-----  
-----  
-----  
-----  
-----  
-----  
-----

-----GCCAAATCTCGCTTT  
CACCCCTGGCGTGGGGACTGGTCCTGGCACGGAGC---GCAGCGTCCCCT  
CGGCAACAGCTTGCTCTCCCGCAGCAAACCGAGGAGCCCCTGTTGCCA  
CCCCCCCGCAGCGATGGTTTGTACCC---CTGCCAACAACCGACTGGAC  
TTTGCTGCCTCGGCATACGACGCCGT-----GATTTTCGCCGGTAA  
CGCGGCCACCTTGCTGTCTACGCTGCGGCGGAGTGAAGGCGC-----  
TTCCCTGCCGACGGCGGGTCTCCAACCGCCTCTTGGCTATTACGCA  
GACCCGTCCG---GCTGG---GGAGACGCACGCCCGCCGAGTACTGTGG  
YGTCAACAGCAAATCCAGCTCGGTGTTCCTGCTGGCCCCGCTAACTCGA  
TCGGCGGCAGGCCTGGAG---CC---AACTACCTGG-----CCGAG  
GA---GGG---GACTC---CATCCCCACCGAGAGATCCCCG---AT---  
CGGTGGCTCGGAGGAG---GCCAAACCCAAAGACATGAC---GTCCGA--  
-GTCGAGCTGGATAGAG---ACGCCGTCTCCATTAAGTCCATCGATTTCG  
AGCGATTCTGGTATCTTTG---AACAGGCCAAGAGGAGACGGATCTCACC  
GTCTGCCACGCCG-----GTTTCAGAGACAGCRTCCCCGTAAAGT  
CTGAGCATCACTCAACAGGCCAAGTCACAGAGAGAGAAGTGGCGTTGGGG  
ATAAATCCGTTTCGCGGATGGGATGGGCGCCTTCAAATAAACACAGCTC  
CCACGACATCGGCTCCG---ACAGACGGCATTTTCCTCCAGGCG---C  
CCGGCTAC---GCAGCAGCCGCCCTGGGA---CACCATCA-----CCAC  
CCGACCCACGTTGGCTCT---TACTCCACGGCGGCTTTCAACTCCACCAG  
GGACTTCTCTTTCAGAAATCGGGGTTCGGGGACGCCACCGG-----  
----GGCGCAGCACAGTTTGTTCGCCTC-----TGGAAGTTT---C  
-----GCAGGGCCACATGGACACTCAGATGCGGCGGGCCACCTGCTCTT  
CCCGGGGCTCCACGAG---CAAGCGGCCCGCCATGCCTCTTCCAACGTGG  
TCAACAGCCAGATGCGGCTGGGCTTCTCGGGGACATGTACGGACGGGCC  
GACCAGTACGGCCACGTTACGAGCCC CGGT---CCGACCACTATGCTTC  
GACCCAGCTGCACGGCTATGGCCCCATGAACATGAATATGGCCGCG---C  
ACCACGGAGCAGGGGCTTTCTTCGCTACATGAGGCAGCCGATCAAACAA  
GAGCTCATCTGCAAGTGGATCGAGCCGGAGCAGCTGACAAACCCCAAAA  
GTCGTGCAACAAACCTTTTAGCACGATGCATGAGCTGGTGACCCATCTGA  
CGGTGGAGCATGTGGGTGGACCGGAGCAGACCAACCAGTCTGTTCTGG  
GAGGACTGCTCCAGAGAAGGAAAGCCATTCAAAGCCAAATACAACTTGT  
AAATCATATCAGAGTACACACCGGAGAAAAGCCCTTCCCTGTCCGTTC  
CCGGCTGTGGCAA

>Elassoma zonatum

AGCTTGCTTATCCGAGCCGAGCTAAGCCAACCTGGGGCCCTTCTTGGGA  
CGACCAGATTTATAATGTAATTGTTACTGCACACGCCCTTGTTATAATCT  
TCTTTATAGTAATACCAATCATAATCGGAGGTTTTGGTAATTGACTTGT  
CCTTTAATAATTGGGGCCCCCTGACATGGCCTTCCCTCGTATGAATAATAT  
GAGCTTTTACTCCTGCCCCATCTTTCTTACTTTTACTTGTTCCTCCG

GAGTAGAAGCTGGAGCAGGTACAGGGTGAACCGTATATCCCCCTTTAGCT  
GGGAATCTAGCCCATGCGGGGCATCTGTTGACCTAACAATTTTTTCACT  
CCATCTTGCAGGGGTTTCCTCAATTCGCGGGCAATCAATTTTATCACAA  
CTATTGTTAACATAAAAACCCCTGCTTTATCACAATATCAGACCCCTTTA  
TTTGTATGATCTGTTTTAATTACAGCTGTACTACTTCTCTTATCCCTTCC  
TGTGCTAGCTGCCGGCATTACAATACTACTAACAGACCGTAACCTCAATA  
CTACCTTCTTCGATCCGGCCGGAGGGGGAGATCCGATTCTCTACCAACAC  
CTG-----  
-----  
-----  
-----

-----NNNNNNNNNNGAACCTTACCCATCTAACTGCCTTGGTATGCTGCTGC

TGCTGATGCCACCAGTGCACCAAGCTGTGCGAGCTCTCCTGGGGCATG  
TGCCCTCAGCAACTTTCCTGCTATTTGCAAGACAGAGGACTTCCCTCCA  
GCCCCAAGACATGGTGGTGCAGCTTTTGTACATGAGGAGCTTGAGACGG  
AAGATGAAAGACTGGTTTATGAAGCTGCCCTTAACTGGATCAACTATGAC  
TTGGAAAGGAGGCATTGTAGCCTTCCAGAGCTCCTGAGAACGGTCCGTCT  
GGCCCTGCTGCCTGCCATCTTTCTCATGGAGAATGTATCTACAGAAGAGC  
TGATCAACGCCCAGGCCAAGAGCAAGGAGCTGGTGGACGAAGCCATACGG  
TGTAARCTGAAGATCCTGCAGAATGACGGCGTTGTTAACAGCCCGTGTGC  
TCGACCAAGAAAACCAGCCATGCCCTTCTCCTTCTGGGTGGGCAGACTT  
TTATGTGTGACAAGTTGTACCTGGTAGACCAGAAAGCCAAAGAGATCATC  
CCCAAAGCGGACATTCCCAGCCCCAGGAAAGAGTTCAGTGCCTGTGCCAT  
TGGCTGTAAGGTGTACATCACAGGAGGGA--GGGGCTC-AGAGAATGGCG  
TTTCCAAAGATGTATGGGTCTATGACACAGTCCACGAGGAATGGTCGAAA  
GCGGCACCGATGCTCATTGCCAGGTTTGGCCATGGCTCCGCTGAGCTGAA  
ACACTGCCTTTATGTGGTGGGAGGTCACACGGCAGCAACTGGCTGCCTCC  
CGCCCTCTCCGTCTAGATCAATACATTTGTTGTGTTTAGTTCGTTCAACA  
AAGACTGATGCTGAACCAAGCAGAGCTTATCATGATGCTATCCCAGGAAT  
TCCAAATGAGAGTGGTACCGGTATCACTAGAGGAACAATCCTTCCCAGC  
ATCGTCCAGGTGATTAGCGGTGCATACATGTTAGTCACTATGCATGGAGC  
TCAGCTAATCACCTCACTCTTTCTGCCAGAGGAGCTTCTGTGGTGGAGC  
TTTACCCTTTTGCTGTTAACCAGAGCAATACACTCCATATAAAAACCCTT  
GCCTCCCTTCCAGGTATGGACCTTCATTATATCTCCTGGAGGAACACTAG  
AGAAGAGAACACCATCACCCACCCAGACAGACCCTGGGAACAAGGGGCA  
TAGCTCATTTGGAGAAGGAAGAGCAAGAGCGTATACTGGCTAGCAAAGAT  
GTACCCAGACACTTGTGCTGCCGCAACCAGAGTGGCTCTTCCGGATCTA  
CCAGGACACTTTGGTTGATATCCCTTCCCTTTTGAAGTCTCTCAA--AG  
AGGGAATGAAG---ACCAAACCCAGCTTTTTTAAA---GTCAAAGCCAGCA  
AGCACAGTCCATCCAGGTCGGGTGAGAGAACCTCAGTGTGACACCTCAGT  
ACAAACCACTAATGAGGCTAAGCTCACAGTCTCCTGGCAGATCCCATGGA  
ATCTGAAATACCTAAAGGTTAGAGAGGTGAAGTATGAGGTGTGGATTTCAG  
AAGAAAGACAGCAGCAAAGGGACGCTGGAGGATCAGATCATTTCAGGCGAA  
TCCGGCGCTGGAGGCGTTTGGCAATGCAAAGACGTCCAGAAACGACA  
CGTCCCCTTTGGAAAATTCATAAGAATTCACTTCGGCACGAGCGGCAAG  
CTGTCGTCGCCCGACATCGAGACATACCTGCTGGAGAAGTCACGAGTCAC  
CTTCCAGCTGAAGGCGGAGAGGAACCTACCACATATCTACCAGATCCTGT  
CAAACGAAAGCCGAGCTGCTGGACATGCTCCTGATCACAACAACCCA  
TACGACTACTCCTACATCTCACAGGGAGAGCTGACGGTCGCCTCCATCGA  
CGACTCCGAGGAGCTGGTGGCCACAGACAGCGCGTTGACGTGCTCGGCT  
TCACTGCTGATGAAAAGATGGGCGTTTACAAGCTGACGGGCGCCATCATG  
CACTACGGCAACATGAAGTTTAAAGCAGAAGCAGCGGAGGAGCAGGCGGA  
GCCAGACGGGACGGAGGCGGGCGATAAATCAGCTTACCTAATGGGGCTGA

ACTCCGCCGACCTCATCAAAGGGCTGTGTACCCGAGAGTCAAGGTTGGA  
AACGAGTACGTGACCAAAGGGCAAAGTGTGGACCAAGTCTACTACCCTAA  
CAAGGAGGCCTTCAAGTGTGAGGAGTGTGGGAAGCACTACAACACCAAGC  
TGGGATACAAGCGGCACGTGGCCATGCACTCTGCAACGGCAGGGGATCTC  
ACCTGTAAAGTTTTGCATGCAGACCTATGAGAGCACACCCATACTCTTGGA  
GCACCTCAAGAGCCACTCCGGGAAGTCTTCTGGTGGTGTCAAGGAGAAAA  
AGCATCCGTGCGACCACTGTGACCGGCGTTTTCTATACACGGAAGGATGTG  
AGACGGCACATGGTGGTCCACACGGGCGAAAGGACTTCCTGTGCCAGTA  
CTGTGCCCAACGCTTTGGCAGGAAGGACCATCTGACACGCCACGTGAAGA  
AAAGCCACTCGCAGGAGCTGCTGAAGATCAAGACGGAGCCTCCGGATATG  
TTAGGTCTTTTAGCCTCTGGGTCTTCCCGTGCTCTGTGAAGGAGGAGCT  
CAGCCCTATGATGTGCGGAATGGGTCCCAACAAAGACCCAATGATGGGAA  
AACCATTTCCAGTGGAGCCCTTTTCCGATGGGCATGTACAACCCCCAC  
CAT-----CTTCAGGCCATGTCTAATTCTGGGGTGGGTACCCA-----  
-CACCCGTCCCTGATGCCTAGTTCTTATCTGCAGCTATTGGCATGGGCT  
GTCACATGGACTATCTCATCTATGCATCATTCTCATTTATGGGATGTTTA  
CAAATTAGTGATGGATCAAATATTGTTAACCTGCTGGCTAGTAATTCTCC  
TAGTGTCTTACGCTCTGACCCAGCAGAAATACTTCAGTAATTACAGTC  
CGGTAATTGGGTTTTACATTTACGAGCCCATTGAATACTGGAACCTCACA  
GTGCAGGAGCATCTGAAGACTCTAAGTCATGGCTTCAACAAGATTTTCATG  
GATGGACAACTTTTTCCATTACCTGCGGGTGGTAAATGTGAGTGCATCTA  
CCAAAAGCGACTTCATTGCCATTCTCAAAGGCTCCTTCCTGCAAAGCCCA  
GAGTATCAGCACTTCACTGAGGACATCATATTCTCCAAAA---ACCGTGA  
GACTG-----ATGAGTACGACATTATTGCTTCACGAATGTACTTGGTGG  
CAAGAACAACAGAGAAGAAGCGCGAAGAGGTGGTAGAGCTTCTGGAGAAG  
CTTCGTCCATTGATGCTGATCAACAGCATCAAGTTCATTGCCTTCAATCC  
TACGTTTGTGTTTCATGGACCGGTACAGCTCCTCTGTCATCTCGCCCATCC  
TGACCTCAGGCTTCAGCATACTCACAATCCTCATACTCACTTTCTTCTTA  
GTTATCAACCCCTTGGGAATTTCTGGCTCATCCTCACGGTAACGTCCGT  
GGAGCTGGGGTCTTGGGCTTGATGGGCTTTCACCAATTTGAATGGCAGC  
CAGCTCTCAAGAATGTGTCTACATCATGCCATGTTGGCATTATTAATGGG  
CTCTCCGGATGGGCCCTCATCGGTGGATGACGCGCTGCTGACACTATCAC  
TCGGAGGTTTTCGCTATGATGTGGCACTAGTGTGACGATTAAAAGATCTGG  
AGGAGGACATCGTGGAGGGCTGAGAGAGAGTGGGATGGAAGACAGTGCT  
TGCACCTCAGGCTTCAATGTGATGATCAAGGAATCTTGTGATGGCATGGG  
TGATGTCAGCGAGAAGCACGGTGGAGGACCGATGGTTCCTGAGAAGGCTG  
TGCGTACTCATTACCGTGATGCGTATCTCTATCCTGGCAGAYGATGAG  
GAG-----GAAGAAGTAACCATCTT  
TACTGAGCCAAAGCCAAACTCAGAACTGTCCTGTAAGCCCCTTTGCCTAA  
TGTTTGTGGATGAGTCAGACCATGAAACACTCACAGCTGTCCTGAGCCCC  
ATCATGTCAGAGCGTAGTGCAATGAAAGAGAGCAGGCTCATTCTATCCAT  
CGGTGGACTACCTCGGTCTTCCGCTTCCACTTCAGAGGCACGGGATACG  
ATGAGAAAATGGTGCCTGAGATGGAGGGCCTCGAGGCCTCGGGGTCCACC  
TATATCTGCACTCTTTGCGACTCTACTCGGACCGAGGCCTCTCAAACAT  
GGTGCTACATTCATCACGCGTAGTCACGACGAGAACCCTAGAGCGTTACG  
AAATATGGAGGACCAACCCCTTTTCTGAGTCTGTAGATGAGTTGCGAGAC  
AGAGTCAAAGGTGTCTCTGCAAAGCCCTTTTTAGAGACCCAGCCCACT  
GGATGCATTACACTGTGACATTGGAAATGCCACTGAGTTCTACAACTCT  
TCCAGGATGAGATTGGAGAGGTTTACCAAAGGT---CAAC---CCGAGC  
CGGGAGGAACGGCGCAGCTGGAGGGCAGCCCTAGATAAACAGCTGAGGAA  
GAAGTTGAAGCTTAAACCGGTGATGAGAATGAACGGGAACTACGCCCGCA  
AGCTAATGACACAGGAGGCCGTGGAGGTGGTCTGTGAACTGGTGCCCTCA  
GAGGAGAGGAGGGAAGCCCTGAGGGAGCTCATGAGGCTCTATATCCAGAT

GAAGCCTGTGTGGCGTGCCACCTGTCCGGCCAAGGAATGCCCCGACCAGC  
TGTGYCGCTACAGCTTTAACTCCCAGAGCTTCGCAGACCTCCTCTCTTCT  
ACATTCAAATACAGGTACAATGGAAAAGATAACCAATTACCTCCACAAGAC  
TTTGGCCCATGTGCCGTGAAATCATAGAGAGAGATGGATCCATAGGAGCCT  
GGGCTAGCGAGGGAAATGAGTCAGCAAACAAATCGTACACCATCGATATG  
GGTCCCATGGGGCCCCGGTGGAAAGGACAACCCGCAGCCTTTCTTCTGCTC  
TATTGAAGATCCAACWAAACAGACAAAGTTCAAGGGCATCAAGACGTACA  
TTTCGTACAGAGTGACGCCGAGTCACACGGGGCATCCYGTCTACAGGCGT  
TACAAACACTTTGACTGGCTTTACAACCGTTTACTSCACAAGTTCACTGT  
GATCTCTGTGCCTCACCTGCCTGAGAAGCAGGCCACGGGGCGATTTGAGG  
AAGACTTCATCGAGAAGCGTAAGCGACGACTGATACTGTGGATGAACCAC  
ATGACCAGTCACCCCGTTCTCTCCAGTATGAAGGCTTTGAGCACTTTCT  
GATGTGCGTCGATGACAAACAGTGGAAACTGGGCAAGAGGCGGGCAGAGA  
AGGACGAGATGGTGGGTGCCACTTCATGCTGACCCTTCAGATCCCTAAT  
GAGCACCAGACCTTCAGGATGTAGAGGAGCGGATCGACACCTTCAAGGC  
GTTTGCCAAGAAAATGGATGACAGTGTAAATGCAGCTCACACACGTTGCGT  
CGGAGCTGGTGCCTAAACATCTGGGGGGGTTCAAGGAGGAGTTCCAGCGG  
CTGGGAAACGCCTTCAGTCCATCAGCCAGGCTTTTCATGCTGGACCCTCC  
CCACAGTTCAGACACCTTCAACAATGCCATCTCACATNNNNNNNNNNNGTTCCCTCAAAGT  
ACCTCTCTGGGCTTCATCATTGGAGTAGGTGTGGTTGGAAACCTCCTGAT  
CTCCATCCTGCTGGTCAAAGACAAGAGCTTGCACCGAGCGCCCTACTACT  
TCCTGCTGGACCTGTGCGCTCCGATATCTTGCCTCCGCCATCTGCTTC  
CCCTTTGTCTTACAGTCCGTCAAGAATGGATCTGCCTGGACCTACGGCAC  
ACTGACCTGCAAAGTGATCGCCTTCCCTGGGTGTGCTCTCCTGCTTCCACA  
CAGCGTTTATGCTGTTCTGCGTCAGTGTACGCGCTACCTGGCCATCGCC  
CATCACCGTTTCTACACCAAGAGGCTGACCTTCTGGACCTGTCTAGCTGT  
CATCTGCATGGTGTGGACGTTGTCAGTGGCTATGGCGTTCCCGCCGGTGC  
TCGACGTGGGGACATACTCTTTTATCCGGGAGGAGACCAGTGCACATTC  
CAGCACCGTTCCCTCAGGGCGAATGATTCACTGGGCTTCATGCTGCTGTT  
GGCGCTCATCCTCCTGGCCACACAGCTGGTTTACCTCAAGCTCATCTTCT  
TCGTCCACGACCGTCGAAAGATGAAGCCCGTCCAGTTTGTGCCTGCTGTC  
AGCCAGAATTGGACCTTCCACGGGCCCGGCGCCAGCGGTCAGGCTGCGGC  
CAACTGGCTCGCCGATTTGGTTCGAGGCCCCACCCCGCTACTTTGCTGG  
GCATTCGGCAAAAACAGCAACGCAGCTGGCCGCAGGCGTCTGCTAGTATTG  
GATGAATTTAAAACAGAGAAGAGGATTAGTAGGATGTTCTACATCATGAC  
GTTTTTCTTCCCTGGCACTGTGGGGACCCTATCTGGTTGCGTGCTACTGGC  
GGGTGTTTGCAAGGGTCCCTGTGGTCCCTGGGGCTACCTGACGGCAGCC  
GTGTGGATGATCTTTGCCAGGNNNNNNNNNNNNNNNNNNNNNNNNNNNNNNNNGCCAAAT  
CTCGCTTTCACCCTGGCATGG  
GGACTGGTCCCTGGCACGGAGC---GCAGCGTCCCACCTCGGCAACAGCTTG  
CTATCCCCGAGCAAAGCGGAGGAGCCTACTGTTGCCACCCCCCGCAGCG  
ATGGTTTGTACCC---CTGCCAACAACCGACTGGACTTTGCTGCCCTCGG  
CATAAGACGAGCT-----GATTTCCGCGGTAACGCGGCCACCTTG  
CTGTCTACGCAGCCCGCGGAGTGAAGGCTC-----TTCCCCTGCCGAC  
GGCAGGCTGCTCCAACCGGCTCTTGGCTATTACGCAGACCCGTCAG---  
GCTGG---GGAGGACGCACGCCCGCAGTACTGTGGCGTGAACAGCAA  
TCCAGCTCGGTCTTTTCCCTGTTGGCCCGCTAACTCTATCGGCGGCAGAGC  
GGGA---CT---AACTACCTTG-----CTGAGGA---GGGA---G  
ATTC---CATCCCACAGAGAGGTCACCG---AT---CGGCGGCTCCGAC  
GAG---ACCAAACCAAAGACATAAC---GTCAGA---ATCGAGCTGGAT  
AGAG---ACGCCGTCTCGATAAAGTCAATTGATTCGAGCGATTCTGGAA  
TCTTTG---AACAGGCCAAAAGGAGGAGAATCTCACCTTCTGCCACACCG  
-----GTCTCAGAGACAGTGTACCATTAAAATCTGAGCATCACTC



GTTCAGATGAGGGTGGTCACTGTGTCCCTTGAAGAGCAATCTTCCCA  
GTATAGTCCAGCTTATCAGTGGTGCCTCAATGTTGGTCAGTATGCATGGG  
GCTCAGCTTGTACCTCACTCTTCTCCCAAGGAGCTGTGGTGGTGA  
ACTCTTCTTATGCTGTGAACCCAGAAGTACACCCCTTATAAAACCC  
TCGCCTCCTTACCGGGGATGGACCTGCAGTATGTGTCCTGGAGGAATATG  
ATGGAGGAAAACACCATCACCCACCCAGATAGATCCTGGGACCAAGGAGG  
CATCGCCACCTGGAAAAGGACGAGCAAGAGCGAATCCTTGCCAGCAAGG  
ATGTTCCGCGGCACCTATGCTGCCACAACCCAGAATGGTTCTTCCGAATC  
TACCAGGACTCTGGTGGACATCCCCTCATTTCTGGAGGTTCTCAA---  
AGATGGCCTGAAGATCACCCAGACCAAGCTTAAAAA---GGCCAAGCCAG  
CTAGCACAGTACATCCAGGCCGGTTCAGGGAAAGRCAGTGTCAAACCTCA  
GTCCAAGCCACCAACGAAGCTAAACTCACKGTCTCCTGGCAGATCCCATG  
GAACCTGAAATACCTGAAGGTGAGAGAGGTGAAGTACGAGGTGTGGATCC  
AGAAGAAGGACACAAGCAAGGAAACCCTGGAGGATCAAATCATCCAGGCC  
AACCCCGCGCTGGAGGCCTTCGGGAACGCCAAGACCATCCGGAACGACAA  
CTCGTCCCCTTCCGGGAAGTTCATCCGCATCCACTTCGGGACAAGCGGAA  
AGCTGTGTCGCCGCGACGTCGAGACCTACCTGCTGGAGAAGTCGCGCATC  
ACCTTCCAGCTCAAGGCCGAGCGGAACTACCACATCTTCTTCCAGATCCT  
GTCCCAAGAGAAGCCGGAGCTGCTGGAAATGCTGCTGATCACCAACAACC  
CGTACGACTACTGCTACATCTCCCAGGGGGAGGTGACGGTGGCGTCCATC  
AACGACAACGAGGAGCTGATCGCCACGGACAGCGCCTTCGACGTGCTCGG  
CTTACCAGGAGGAGAAGATGTCCATCTACAAGCTGACCGGCCATCA  
TGCACTACGGCAACATGAAGTTCAAGCAGAAGCAGCGGAGGAGCAGGCC  
GAGCCCGACGGCACMGAGGCCGCCGATAAGTCGGCGTACCTGATGGGCT  
GAACTCGGCCGACCTCATCAAAGGACTCTGCCATCCCCGAGTCAAGGTGG  
GAAACGAGTTTGTACGAAAGGCCAGGGCGTAGATCAAGTCTACTAC---

-----  
-----  
-----  
-----  
-----  
-----  
-----  
-----  
-----  
-----

-----TATCTCATCTACGCGTCATTTCTCCTTCATGGGATGTT  
TACAAATCAGCGACGGGTCAAACATTGTGAACCTGCTGGCAAGTAACTCT  
CCGAGTGTGTCTTTTGCCTCACCCAGCAGAAGTACTTCAAGTAACTACAG  
CCCTGTTATTGGGTCTACATTTATGAACCCATCGAGTACTGGAATTCCA  
CGGTGCAGGAGCACCTGAAGACTGAGTACCGCTTCAACAAGATCTCC  
TGGATCGACAACTTTCTTCACTACCTGCGGGTGGTAAACGTGAGCGCGTC  
GACCAAGAACGACTTCATCACCATCCTAAAGGACTCCTTCTTACACAGCC  
CAGAGTACCAGCACTTACCAGGACATCATCTTCTCCAAGA---ACCGC  
GAGAGCG-----ACGAGTACGACATCATCGCTCGCGCATGTACCCTGGT  
GGCGCGACACCCGAGAAGAAACCGGAGGATGTGGTGTGCTGCTGGAGA  
CGCTGCGTCCGCTGATGCTGATCAACAGCATCAAGTTCATCGCTTCAAC  
CCCACCTTCGTCTTCATGGACCGCTACAGCTCCTCGGTCAATCGCCAT  
CCTTACCTCAGGCTTCAGCGTGTACCCATCCTCATCCTCACCTTCTTTC  
TCGTCATCAACCCACTGGGAACTTCTGGCTCATCCTGACGGTACGTCG



ATTCTCCTGGCCACACAGCTGGTTTACCTCAAGCTCATCTTCTTCGTCCA  
CGACCGTCGAAAGATGAAGCCCCGTCCAGTTCGTGCCGTGCCGTCAGCCAGA  
ACTGGACCTTCCACGGGCGGGCGCCAGCGGGCAGGCGGCGGCAACTGG  
CTGGCCGATTGGTAGAGGCCCAACCCCGCCTACTTTATTGGGCATCCG  
GCAGAACAGCAACCGGGCGGGTCGTAGGCGTCTACTGGTGTGGATGAGT  
TCAAAACAGAGAAGAGGATTAGTAGGATGTTCTACATCATGACATTTTTT  
TTCTGGCACTGTGGGGGCCCTACCTGGTAGCCTGCTACTGGCGGGTGT  
TGCAAGGGGGCCCCGTAGTACCTGGGGGCTACCTGACGGCAGCCGTGTGA  
TGAGCTTTGCCAGGGCGGGGGTCAACTCCNNNNNNNNNNNNNNNNNNNNNNNNNNNNNNNGCCAAGTCCCGCTT  
TCACCCT

GGCGTGGGGAGCGCTGCTGGCACGGAGCGCTGCAGCGTCCCCTCAGCAA  
CAGCTTGCTCTCTCAGCAACAAACCGAGGATCCCGCCGTG---CCTCCC  
CGCAGCGATGGTTTGTACCC---CTGCCAACAACCGACTGGACTTCGCA  
GCCTCGGCATACGACGCCGCT-----GATTCGCCGGTAACGCGGC  
CACCTTGCTGTCTGACGCCGCGGCGGAGTGAAGGCTC-----TCCCCC  
TGCCGACCGCAGCTTGCTCCAACAGACCTCTGGGTATTACGCGGACCCG  
TCGG---GCTGG---GGCGCGGCACGCCTCCCCAGTACTGC-----  
-AGCAAGTCGGCCTCGGTCTTTCTTGCTGGCCACGAATTCTGTGCGGA  
GCAGAACGGGCA-----CAAACACTAT-----TGGAGGA---C  
GGATCGGACGC---CATTTCAACGGAGAGGTCCCCG---AT---TAATGG  
CTCGGAGGAG---GCGAAAGCCAAAGACTT-----GTCCGA---GTCTA  
GCTGGATAGAG---ACGCCATCTTCGATCAAATCAATTGACTCAAGTGAT  
TCTGGCATCTTTG---AGCAAGCAAAGCGGAGACGAATTTACCCGTCTGC  
CACACCA-----GTTACAGAAACGGTGTCTCCGTTGAAATCTGAA-

-----  
>Eleotris pisonisa  
AGCCTACTGATCCGCGCTGAACTAAGTCAACCTGGTGCCTACTGGGGGA  
CGACCAAATCTACAATGTTATCGTTACGGCTCATGCCTTCGTAATGATTT  
TCTTTATAGTAATGCCAATTATGATTGGGGGATTTGGAACTGATTAATC  
CCACTAATAATCGGTGCCCCGACATGGCCTTCCCCTCGAATAAATAATAT  
GAGCTTCTGACTTCTCCCCCTTCTTCCCTCCTCCTCCTGGCATCCTCTG  
GGGTGAAGCGGGGCGAGGCACAGGGTGAACCGTCAACCCCTTTAGCA  
GGGAAACCTTGCCACGCAGGGGCTCTGTAGACCTAACCATCTTCTCACT  
ACACCTAACAGGGGTATCCTCAATCTGGGGGCAATCAACTTTATCACA  
CAATTATCAACATGAAACCCCGCAATCTCGCAATATCAGACCCCCTTG



TTTGTGTTGAGCCGTTCTAATTACCGCTGTCCTACTACTACTCTCACTGCC  
CGTGCTTGCCGCTGGCATTACAATGCTCCTAACAGATCGAAATCTAAATA  
CGACTTTCTTTGATCCCGCGGGAGGAGGGGACCCAATCCTGTACCAACAT  
CTTTTCTGATTCTTTGGGCACCCTGAAGTCTACATTCCTTATTCTCCCGG  
CTTTGGAATAATCTCTCACATTGTTGCATACTATGCAGGCAAAAAAGAAC  
CTTTGCGCTACATGGGAATGGTGTGAGCCATGATGGCTATCGGCCTCCTG  
GGCTTTATTGTTTGAGCCACCACATGTTACAGTAGGCATGGATGTTGA  
CACCCGAGCCTANNNNNNNNGAGAAACCTCCATCCATCAAACCTGCTGGGCATGCTGC  
TGCTGTCGGACGCTCACCAGTGCACCAAGCTCTCGGAGCTCTCCTGGGGC  
ATGTGTCTCAGCAACTTTCCTGCAATCTGCAAGACTGAGGACTTCTCCTCA  
ACTGCCCAAAGACATGGTTGTGCAACTTTTATCTCATGAGGAGCTAGAAA  
CGGAAGATGAGAGACTGGTTTATGAAGCTGCTCTCAACTGGGTCAACTAT  
GACTTGGAACGGAGACTGCCACCTTCCTGAACTCCTCAGAACAGTGCG  
ACTTGCTTTGCTGCCAGCCATTTTTCTGATGGAGAATGTGTCAACAGAGG  
AGCTGATCAATGCCCAGGTCAAGAGCAAAGAGCTGGTGGATGAGGCCATA  
CGCTGTAAGCTGAAGATCCTGCAGAATGACGGGGTCGTCAATAGTCCCTG  
TGCTCGACCCAGAAAAACCAGCCACGCCCTTGTTCCTTTAGGAGGGCAGA  
CTTTTCATGTGTGACAAGCTGTACCTGGTGGACCAAAAAGGCCAAAAGAGATT  
ATCCCAAAGGCTGACATACCAAGTCCCAGAAAAGAGTTTCAGTGCTTGCGC  
CATTGGTTGTAAGGTGTATATAACGGGAGGAA--GGGGTTC-CGAGAATG  
GTGTATCCAAGGACGTATGGGTTTATGATACTGTTTCATGAGGAATGGTCC  
AAAGCAGCACCTATGCTCATTGCCAGGTTTGGCCATGGTTCTGCGGAGCT  
CAAACACTGCCTTTATGTTGTTGGAGGTCACACAGCAGCAACTGGCTGCNNNNNNNNNNNNNNNNNNNG  
GAGGAATACATTGTCGTTTTTTAGCCGTTCCACTACTAGGCTTATATTGAA  
CGAAGCAGAGTTGATAATGGCATTAGCGCAAGAGTTTCAGATGCGAGTGG  
TTACGTTTTCCCTGAAGACCAGTCCTTTGCTAGCATTGTCCAAGTTATA  
AGTGGAGCCTTTATGCTAGTTAGCATGCATGGCGCACAGCTAATCACCTC  
ACTATTTTTGCCTAGGGGTGCTGTAGTTGTTGAATTGTTTTCCATTTGCAG  
TCAACCCAGAACAGTATACCCCTTACAAAACATTGGCGTCCCTTCTGGT  
ATGGACTTGCACTATATACCATGGAGAAACTCAAATGAAGAGAATACAAT  
CACCCATCCTGATAGGCCATGGGAGCAAGGCGGCATCAGTCACTTGAAA  
AATCAGAACAAGAACGGATATTGGCCAGCAAAGATGTCCCGCGACACTTG  
TGTTGTCGTAACCCGGAGTGGCTTTTCCGAATTTACCAGGATACGTTAGT  
GGATATACCATCATTTTTGGACGCGGTCAA---GGAAGGCATGAAA---A  
CTAAACCAATTTTTGAAAAA---GTCCAAAACGGCAACTTTGGTCCACCCA  
GGACGCTTCGCGAGGCGCAGTGTCAAACCTTCAGTACAGACATCAAATGA  
GGCGAACTTACAGTGTCTTGGCAAATACCGTGGAAATTTAAAGTTTTTGA  
AAGTAAGAGAGGTCAAGTACGAAGTGNNNNNNNNNNAAGAAGGACCAGAACAAGGGTACT  
CTGGAAGACCAGATTATCCAGGCCAACCCGGCCTTAGAGGCTTTCGGAAA  
CGCCAAGACCGTTCGCAACGACAACCTCGTCCCGGTTTGGGAAGTTTATCC  
GGATCCACTTCGGGACGAGCGGGAAGCTGTCGTCTGCCGACATCGAGACC  
TACCTCCTGGAGAAGTCCCGAGTACGTTCCAGCTCAAAGCGGAACGGAA  
CTACCACATCTTCTACCAGATCCTGTCCAATCAGAAGCCGGAGCTGCTGG  
ACCTGCTGCTCATACCAATAACCCGTATGATTACTCGTACATCTCTCAG  
GGCGAGGTCACCGTCGCCTCCATCAACGACTCCGAGGAGCTCATCGCCAC  
CGACAGCGCCTTCGACGTGCTCGGGTTCCTCCGGAGGAGAAGGTGGGCG  
TCTACAACTCACCGGGGCCATCATGCACCACGGAAACATGAAGTTCAA  
CAGAAACAACGTGAGGAACAGGCCGAACCCGACGGCACCGAGGCCGCCGA  
TAAATCCGCCTTCTCATGGGTCTGAACTCAGCCGATCTCATCAAAGGTC  
TGTGCCACCCCGGGTTAAAGTCGGGAATGAGTACGTGACCAAAGGCCAG  
GGTGTGGACCAGGTGTACTIONNNNNNNNNNNNNNNNNNCAAGTGTGAGGAGTGCGGGAAGCACTACA  
ACACCAAGCTGGGATACAAGCGGCACGTGGCCATGCACTCGGCCACTGCG  
GGCGACCTGACGTGTAAGGTGTGCCTACAGAGCTACGAGAGCACCCCGGT



WCTATAGATATGGGACCCGTAGGCCACGCTGGAAGGACAACCCGAATCC  
CTTCATATGCTCTATCGAAGACCCAACAAAGCAGACCAAATCAAGGGTA  
TAAAGACTTACATATCATAACGGGTCACCCCAACCCACACGGGACGCCCG  
GTTTATAGGCGCTACAAGCATTTGACTGGCTCTACAACCGTCTTCTGAA  
CAAGTTCCTGTAATCTCCGTCCCTCATTTGCCGAAAAGCAAGCCACGG  
GTCGGTGTGAGGAGGACTTTATCGAAAAACGAAAAAGACGGCTTATATTG  
TGGATGAATCACATGACCAGTCACCCAGTTCTGGCCAGTACGAGGGGTT  
TGAACACTTTCTGATGTGCGCCGACGACAAACAGTGGAACTAGGCAAGA  
GGCGAGCGGAGAAGGACGAAATGGTGGGYGCYCACTTCATGCTCACCTT  
CAGATCCCAAACGAGCACCAGGATTTACAAGACGTGGAGGAGAGGGTGA  
CACCTTCAAGAAAYTCGCCCGAAAAATGGACGATAGCGTCTTGCAGCTCA  
CGCATGTMGCTTCGGAGCTGGTTCGTAAACATCTGGGWGGATTTAGGAAA  
GAGTTYCARCGTCTGGGTAATGCGTTTTCAGTCCATAAGCCATTTCGTTTTC  
ATTGGACCCCCCTCACTGCTCGGACACCCTCAATAACGCCATCTCGCACNNNNNNNNNNNNNNNNNNNN

C

TGACCTCCCTGGGTTTCATCATTTGGCGTCCGGTGGTCCGAAACCTCCTG  
ATCTCCATCCTGCTGGTCAAAGACAAGAGCCTGCACCGAGCGCCTACTA  
TTTCCCTATTGGACCTGTGTGCGTCTGACATCCTGCGCTCGGCTATTTGCT  
TCCCTTTCGTCTTCACCTCTGTAAGAATGGATCCGCCTGGACATACGGC  
ACGCTAACCTGCAAAGTCATYGCCCTTCTGGGGGTGCTGTCCTGTTTCCA  
CACAGCATTCATGTTGTTTTGTGTGAGCGTCACTCGCTACCTGGCCATAG  
CACACCACCGCTTCTACACCAAGAGGCTGACCTTCTGGACCTGCCTGGCA  
GTCATCTGTATGGTGTGGACGTTGTCGGTGGCTATGGCGTTCACCCGGT  
GCTAGACGTAGGGACGTACTCGTTTATCCGCGAGGAGGACCAGTGCACGT  
TCCAGCATCGCTCATTCAGGGCCAACGACTCGCTGGGCTTTATGCTGCTG  
CTGGCGCTCATCCTCCTAGCCACACAGCTGGTTTACCTCAAGCTCATTIT  
CTTTGTACACGACCGCAGAAAAATGAAGCCGGTCCAGTTTGTGCCTGCCG  
TCAGCCAGAACTGGACCTTTTCATGGGCCAGGAGCCAGCGGGCAGGCAGCG  
GCTAATTGGCTAGCCGGTGTGGTTCGCGGCCCCACCCGCCCCTCTGCT  
GGGCATTCGGCAGAACAGCAACGCGGGGCCGAGACGTCTGCTGGTGC  
TGGACGAGTTCAAACGGAGAAGAGGATTAGTAGGATGTTCTACATCATG  
ACGTTTTTCTTCTGGCTCTGTGGGGCCCTATCTGGTGGCCTGCTACTG  
GAGGGTGTTCGCCAGGGGCCCAGTGGTCCCTTGGGGCTACCTGACCGCAG  
CCGTGTGGATGAGCTTGTCCAGGCTGGGGTCAATCCGTTCATCTGCNNNNNNNNNNNNNNNNNNNN

-----  
-----  
-----  
-----  
-----  
-----  
-----  
-----  
-----  
-----  
-----  
-----  
-----  
-----  
-----

-----CATCACTCAACAGGCGAAGTCACGGAGCGAGAA  
GTAGCGCTGGGGATCAACCGTTTCGCTGATGGGATGGGCGCCTTCAAAT  
CAACCACAGCTCACACGACCTGGGGTCCGG---ACAGACCGCCTTCTCAT  
CCCAGGCG---CCGGGTAC-----GCCGCTTTAGGA---CACCAC  
CA-----CCACGCGACCCATGTTGGCTCT---TACTCCACA-----TT

CAACTCCACACGGGACTTTCTCTTTAGAAATCGGGGGTTTGGAGACGCTG  
CCGG-----GGCACAGCACAGTTTATTTCGCGTC-----A  
GGAAGTTT---C-----CCCGGGCCACATGGACACTCTGAAGCGGCGGG  
GCACCTGCTTTTCCCGGGCTGCACGAA---CAAGCGT-----CGT  
CGTCCAACGTTGTCAACAGTCAGATGCGCTTGGGCTTCTCCGGGGATGTG  
TACGGACGGGCCGAGCAGTACGGCCATGTCACCAGCCCGAGGT---CCGA  
CCACTACGCGTCCACACAACACTGCACGGATACGGCCCATGAACATGAATA  
TGGCCGCGGCACACCATGGAGCGGGGGCCTTCTTTAGATACATGCGGCAG  
CCCATCAAACAGGAGCTCATCTGTAAGTGGATTGAACCCGAGCAGCTAAG  
CAACCCCAAGAAGTCGTGCAACAAAACCTTTCAGCACCATGCACGAGCTGG  
TCACCCATCTAACTGTGGAACACGTGGGGGGACCGGAGCAGACAAACCAC  
ATCTGTTTCTGGGAGGAGTGTCTCCAGAGAGGGGAAACCTTTTAAAGCCAA  
ATACAAACTGGTCAATCATATCCGAGTGCACACAGGGGAGAAACCCCTTCC  
CGTGCCCGTTCCCGGGCTGTGGCAAA

>Elops saurus

AGCCTCTGATCCGAGCCGAATTAAGCCAACCCGGGGCGCTTCTGGGAGA  
CGACCAGATTTATAATGTCATCGTCACAGCACACGCCTTTGTAATAATCT  
TCTTTATAGTAATGCCAATCATAATTGGTGGCTTTGGAACTGACTGATC  
CCTCTCATGATCGGAGCCCTGACATGGCGTTTCCCGAATAAATAATAT  
AAGCTTCTGACTTCTACCACCCTCTTTCCTGCTGTTGTTGGCCTCTTCTG  
GAGTGGAAAGCAGGAGCGGGGACCGGATGAACCGTCTATCCGCCCCGCGG  
GGAAACCTCGCCCACGCGGGAGCATCCGTCGACCTAACCATCTTCTCCCT  
CCACCTTGCAGGTGTGTCTTCTATCCTGGGTGCTATCAACTTTATTACTA  
CAATTATTAACATGAAACCGCCAGCAATAACACAATACCAAACGCCACTA  
TTCGTTTGGAGCAGTACTGATCACCGCGTTCTTCTCCTCCTATCGCTGCC  
AGTGCTAGCTGCTGGCATCACAATGCTGCTAACAGACCGAAACCTGAACA  
CAACCTTCTTTGACCCGGCAGGCGGAGGAGACCCAATCCTTTACCAACAC  
CTATTCTGGTTCTTCGGGCACCCAGAAGTATACATTCTAATTCTCCCAGG  
CTTCGGAATAATCTCACACATCGTAGCCTACTATGCAGGCAAAAAAGAAC  
CATTTCGGCTACATGGGCATAGTATGGGCAATGATGGCTATTGGTCTTCTT  
GGCTTTATCGTATGGGCACACCACATGTTTCACGGTAGGAATGGATGTAGA  
CACACGTNNNNNTTCTGGAGAGGAACCTGCACCCCACCAACTGCCTGGGCATGC  
TGCTGCTGTCGGACGCGCACCAGTGCACCAAGCTGTCGGAGCTCTCCTGG  
GGCATGTGCCTGAGCAACTTCCCCACCATCTGCAAGACGGAGGACTTTCT  
GCAGCTGCCCCAAGGACATGCTGGTGCAGCTCCTGTCCCACGAGGAGCTGG  
AGACGGAGGACGAGAGGCTGGTGTACGAGTCGGCCCTCAACTGGGTCAAC  
TACGACCTTGAGAGGAGGCACTGCTACCTCCCGGAGCTGCTGCGCACCGT  
CCGCCTCGCCCTCCTGCCCCCATCTTCTCATGGAGAACGTCTCCACCG  
AGGAGCTCATCAACAAGCAGGCCAAGAGCAAGGAGCTGGTGGACGAGGCC  
ATCCGGTGCAAGCTGAAGATCCTGCAGAACGACGGCGTGGTCAAGCCT  
GTGCGCCCGGCCAGGAAGACAAGCCACGCCCTCTTCTCCTGGGCGGCC  
AGACCTTCATGTGCGACAAGCTGTATCTGGTGGACCAGAAGGCCAAAGAG  
ATCATCCCCAAAGCTGACATCCCCAGCCCCGCAAGGAGTTCAGCGCCTG  
CGCCATCGGCTGCAAGGTCTACGTGACGGGTGGCC--GAGGCTC-GGAGA  
ACGGCGTGTCCAAAGACGTCTGGGTCTACGACACCTTGCACGAGGAGTGG  
TGCAAGGCCGCGCCCATGCTCATCGCCCGTTTCGGTCACGGCTCGGCCGA  
GCTGAAGCACTGCCTGTACGTGGTGGGCGGGCACACGGCCGCCACCGGCT  
GCCTGCGGGCCTCGCCATCATGATGCGTACATTGTGGTTTTTCAGCCGCTC  
CATCAACAGGCTCATCCTGAACGAGGCGGAGCTAATTCTGGCACTGGCGC  
AGGAGTTCAGATGAGGGTGGTCAACCGTGTCCCTGGAAGAGCACTCGCTG  
GCGGACATCGTTTCGGGTTGTTGGTGGGGCGTCCATGCTGGTCAAGCATGCA  
TGGGGCCCAGCTCATAACCTCCCTGTTTCTACCACGTGGCGCCGCTGTGG  
TGGAGCTTTTCCCGTACGCTGTAAACCCAGAGCACTATGCTCCCTACAGG

ACACTGGCCTCGCTGCCGGGCATGGACCTGCAGTACGTGGTTTGGAGGAA  
TACCATGGAGGAGAACTCTGTGGCCTTTCCCGAGCGCTCCTGGGACCAGG  
GTGGCATTGCACACCTGGAGAAGGAGGAGCAGGAGCGCATCCTGAAGAGC  
AAGGAGGTGCCGCGACACCTGTGCTGCCGGAACCCAGAGTGGCTTTCCG  
CATCTACCAGGACACCAAGGTGGACATCGCCTCCCTGCTGGACACTCTAC  
G---TCAGGGGTTGACC---TCCAAGCCAAACCTCAAGAG---AGCCAGG  
GCTATCAGCGCAGTCCATCCAGGCAGAGTGAGGGAGCCCAGGTGCCAGAC  
CTCTGTCCAAGCCGCAATGAGGCCAAGCTGACTGTGTCCTGGCAGATCC  
CCTGGAACCTCAAATACCTGAAGGTAAGGGAGGTGAAATATGAGGTGTGG  
ATTGAGAAGAAGGACACCAGCAAGGGAACACTGGAGGATCAAATCATCCA  
AGCCAACCCAGCGCTGGAGGCTTTTGGCAATGCAAAGACCGTAAGGAATG  
ACAACCTCCTCACGTTTCGGGAAATTCATCCGCATTCATTTTGGAGTGAGT  
GGTAAACTGTCCTCCGCTGACATCGAGACCTACCTGCTGGAGAAAATCCCG  
AGTCACCTTTCAGCTCAAAGCTGAGAGGAACTACCATATCTTTTATCAGA  
TTTTATCCAACAAGAAGCCAGAGTTGCTGGACATGTTGCTTATTACCAAC  
AACCCATATGATTATGCTTACGTCTCCCAAGGAGAGGTAACAGTTGCATC  
AATTGATGATACTGAGGAGCTCATTTGCCACAGACAGTGCCTTTGATGTGC  
TGGGATTCACGGCAGAGGAGAAGATGGGTGTCTACAAGCTGACAGGTGCC  
ATCATGCACTATGGTAACATGAAGTTCAAGCAGAAACAGCGTGAGGAGCA  
GGCAGAGCCTGATGGTACTGAGTCTGCTGATAAGTCAGCCTACCTAATGG  
GGCTAAACTCAGCTGACCTTGTCAAAGGACTGTGTCACCCAAGAGTCAA  
GTTGGCAATGAGTATGTCACCAAGGGCCAAAGTGTGGACCAAGTTTACTA  
CCCGAACAAGGAGGCCTTCAAGTGCAGGAGTGCAGGCAAGAAGTACAACA  
CCAAGCTGGGCTACAAGCGTCACGTGGCCATGCATGCGGCCACCAGTGGC  
GACCTCACCTGCAAGGTGTGTCTACAGAGCTACGAGAGCACGCCAGTGC  
GCTGGAGCACCTCAAGAGCCACTCGGGGAAGTCCCTCGGGCGGGGCTAAGG  
AGAAGAAGCACCCCTGCGACCACTGCGACCGCCGCTTCTACACGCGAAAG  
GACGTGCGCCGCCACATGGTGGTGCACACTGGCCGCAAGGACTTCTTGTG  
CCAGTACTGCGCCAGCGCTTTGGCCGCAAGGACCACCTGACCCGCGCAG  
TGAAGAAGAGCCACTCCCAGGAGTTGCTGAAGATCAAGACGGAGCCGCCT  
GACATGCTGGGCCTGCTGGGGTCTGGCTCTCCACCCTGCCCTGTGAAGGA  
GGAGCTTAGCCCTATGATGTG---CATGGGTCCCTCCAAGGACTCCCTGA  
TGGGCAAGCCCTTCCCCGGAG-----CCTTCCCCATGGGTATGTACAAC  
CCCCAC-----CTGCAGGCCATGTCCAACCTCTGGGGTGTCC-----  
-----CACCCTCCCTGGTGTCCGGTTCACTGTCTGCAGCCATGGGCA  
TGGGGTGCCACATGGATTACCTAATTTATGCGTCATTTTCGTTTATGGGA  
TGTTTACAAATTAGTGATGGATCAAACATAGTCAACCTTTTAGCCAGCAA  
CTCTCCGAGCGTCTCCTATGCTCTGACCCAGCAAAAATATTTAGCAACT  
ACAGTCCGTGAATTGGGTTCTATATTTATGAGCCCATAGAGTACTGGAAT  
TCCACTGTTTCAAGGACACCTGAAGACGCTGGGCCACGGATTCAATAAGAT  
TTCATGGATCGACAACACTTTTCAAGTATCTGAGGGTGGTGAATGTGAGCG  
CATCAACCAAAAGCGAATTCATAACTATCCTCCAGACTTCTTTTTTAAGG  
AGCCGAGAATACCAGCACTTCAAGGATGACATCATTTTTTACAAA---T  
GAGGG-----ACGAGACAGAGATCATCGCATCTAGGATGTACC  
TGGTGGCCAGAACCACAGAGAAGACGAGGGAGGAGGTCGTGGAGTTACTG  
GAGAGACTGAGACCTCTGTCTCTTATCAACAGCATCAAGTTCATCGTCTT  
CAACCTACCTTCGTTTCATGGATCGATACAGCTCCTCCGTCATTTTCYC  
CYATTCGACCTCTGGGTTTCAAGCGTCTGATTGTTCTGATCCTGACATTC  
TTCTGGTTCATCAATCCCCTTGGAAACTTCTGGTTGATTCTGACGGTCAC  
CTCAGTGGAGCTGGGAGTTCTTGGCCTCATG-----  
-----  
-----  
-----

-----  
-----  
-----A  
AGGCAGTGCGGTTCTCCTTACCATCATGTCAATCTCGGTCCAGCTGGCG  
GACGGGGG-----AAGCAGGTGAC  
CGTGTTCAGGAGCCGAAACCCAACTCCGAGCTGAGCTGCAAGCCGCTGT  
GCCTGATGTTTGTGACGAGTCAGACCACGAGACGCTAACCGCTGTGCTG  
TGGCCCGTGGTGGCCGAGCGGAACGCCATGAAGGAGAGCCGGCTCATCCT  
CTCCATCGGGGGGCTGCAGCGGTCTTCCGCTTCCACTTCCGGGGCACGG  
GCTACGACGAGAAGATGGTGAGAGAGATGGAGGGCCTGGAGGCCCTCAGGC  
TCCACCTACATCTGCACGCTGTGTGACTCCACCAGGGCTGAGGCTTCCCA  
GAACATGGTCTTCACTCCATCACCAGGAGCCACGATGAAAACCTGGAGC  
GGTACGAGATCTGGAGGACCAACCCCTACTCGGAGTCTGCCGAGGAGCTA  
CGTGACC CGCTCAAGGGCGTGTGCGGCCAAGCCCTTCATGGAGACCCAGCC  
CACCCTGGACGCGCTGCACTGCGACATCGGCAACGCCACTGAGTTCTACA  
AGATCTTCCAGGACGAGATTGGTGAGGTTACCTGAATGG---CAAC---  
CCCAGCCGCGAGGAGCGCCGCCGCTGGAGGTCGGCCCTCGACAAGCAGCT  
GAGGAAGAGGATGAAGCTGAAGCCGGTGATGCGGATGAACGGGAAC TACG  
CCCGCCGGCTCATGACCCGGGAGGCGGTGGAGGCAGTGTGTGAGCTGGTG  
CCATCGGAGGAGCGCAGGCAGGCCCTGAAGGAGCTGATGGAGCTCTACCT  
GCAGATGAAG-----  
-----  
-----  
-----

-----  
NNNNNNNNNNNNNNNNNNNNNNNNNNNNNNNNNNNNNNNNNNNNCCAGTGGAAGG  
AGAGCCCTCAGCCCTTCTCCTGCTCCATCGAAGATCCCACGAAACAGACC  
AAGTTCAAGGGCATCAAGACGTACATTTTCGTACCGTGTGACGCCAGCCA  
CACCGGCCGGCCCGTGTACCGCCGCTACAAGCACTTCGACTGGCTCTACA  
ACCAGCTGCTGCACAAGTTCACCGTTATCTCTGTGCCCCACCTGCCTGAG  
AAGCAGGCCACCGGGCGCTTCGAGGAGGACTTCATCGAGAAGCGGAAGAG  
GCGGCTGATACTCTGGATGGACCACATGACCAGCCACCCGGTGTGTGCG  
AGTACGAGGGCTTCGAGCACTTCCCTCATGTGTGCGGACGACAAGCAGTGG  
AAGCTGGGTAAGCGGGCGGAGAGAAGGATGAGATGGTGGGCGCCCACTT  
CTTGCTCACCTTCCAGATCCCCAACGAGCACCAGGACCTGCAGGACGTGG  
AGGAGCGTGTAGACTCCTTCAAGGCCTTACCCGGAAGATGGATGAGAGC  
GTCATGCAGCTGACGCACGTGCGCTCCGAGCTGGTGC GCAAGCACCTGGG  
CGGCTTCCGCAAGGAGTTCAGAGGCTGGGCAACGCCTTCCAGTCCATCA  
GCCAGGCCTTACCATGGACCCGCCCACTGCTCGGACGCCCTGAACAAT  
GCCATATCACACCCACTGGCCACGTTCCCTCAAACCTGACATCCCTGGGTTT  
CATCATCGGAGTCCGAGTGGTCCGCAATCTCCTGATCTCCATCCTGCTTG  
TCAAAGACAAAAGCTTGCACAGAGCCCCCTACTACTTCCCTGCTGGACCTT  
TGTGCCCTGACATACTCCGATCTGCCATTTGTTCCCTTTTGTTTTTCAC  
CTCGGTCAAAAATGGGTCAACGTGGACGTACGGCACGCTGACCTGCAAGG  
TAATCGCTTTCCCTGGGGTGCTGTGCTGCTTTTACACCCGCTTTATGCTC  
TTCTGCATCAGCGTCACCCGCTACCTGGCCATCGCCCACCACCGCTTCTA  
CACCAAGAGGCTGACATCTGGACCTGTCTGGCTGTCATTTGCATGGTGT  
GGACGTTGTGAGTGGCCATGGCCTTCCCCCAGTTCGGATGTAGGGACC  
TACTCCTTCAATAGGGAAGAGGACCAGTGCACCTTCCAGCACCGCTCCTT  
CCGAGCCAACGACTCGCTGGGGTTCATGCTGCTCCTGGCCCTCATCCTCC  
TCGCCACCCAGCTTGTCTACCTCAAGCTAATCTTCTTCGTCCACGACCGC  
AGGAAGATGAAGCCGGTTCAGTTTCGTGCCAGCCGTCAGCCAGA ACTGGAC  
CTTCCACGGCCCCGGGGCCAGTGGCCAGGCGCCGCAACTGGCTGGCGG

GTTTTGGCCGGGGCCCGACGCCGCCACCCTGCTGGGGATCCGTCAGAAC  
ACTAACACGGCGGGCCGGAGACGACTGCTAGTGCTGGACGAGTTTAAAC  
CGAGAAAAGGATAAGCAGGATGTTCTACATCATGACCTTCTTCTCCTGA  
CCTTGTGGGGGCCCTATCTGGTGGCTGCTACTGGAGGGTGTTCGCCAGG  
GGCCAGTGTTGCCGGGAGGATACCTAACCGCCCGTCTGGATGAGTTT  
TGCTCAGGCCGGAGTCAATCCATTCTGCANNNNNNNNNNNNNNNGCCAAATCACGCTTCCAC  
CCTGGCGCAGGGAACGGGTCTGGCACGGACC---GCAGCGTCCCACCTTAG  
CAACAGCTTGTGTCCCCACAACAAGCCGAGGAGGTCGCGGCGG---CTT  
CCCCGAACGATGGTTTGTACCT---CAGCCAACAATCGACTGGACTTT  
GCAGCCTCGGCTTACGATGCAGCAGCAGCCGCTGATTTTGCCGGTAACGC  
GGCCACATTGCTGTCTTATGCGGCCGCTGGGGTCAAGGCAC-----TTC  
CACTGYCAACAGCAGGGTGTCTAGGTAGACCCTAGGTTATTACCCGGAC  
CCCTCGG---GGTGG---GGCACGCGCACTCCTCCGAGTATTGC-----  
----AGTAAGTCCAGCTCTGTCTCTGCTGCTGGCCCTCCAAT-----G  
GGAGCAGGACTGGCG---CCTCGAACTACCTGC-----TAGATGA-  
--ATCG---GACAC---CCTCTCAACTGAAAGATCTTCG---CT---TGG  
TGGGTCTGAAGAC---GCCAAACCCAAAGAACT-----GTCGGA---AT  
CAAACCTGGATAGAG---ACACCTTCTTCCATAAAAGTCAATTGATTCCAGC  
GATTCTGGAATTTTGT---AGCAGGCCAAACGGAGAAGAATATCACCTCC  
CCCTACGCCG-----GTTTCGAAACGGCTTCTCCGCTGAAAAGTG  
AA-----ACCGCGAAGTACAGACAGAGAAGTGGCTTTGGGGATA  
AATCCCTTTGCTGATGGCATGGGCGCTTTTAAAATCAACCACAGACCCA  
CGACCTGGGCTCTGG---ACAAACAGCCTTTTCTCGCAAGCA---CCAG  
GCTAC-----GCCGCTGCCCTGGGA---CACCACCA-----CCACCC  
ACCCATGTCAGCTCC---TATTCCACAGCGGCGTCAATTCCACCCGGGA  
CTTTCTGTTTAGAAATCGGGGCTTCGGAGACGCCACCAG-----  
-TGCACAGCACAGTCTTTTTCGCTCCGC---AGCAGGAAGTTT---T---  
---GCAGGGCCACATGGACACTCGGATGCCACGGGGCACCTGCTTTTCCC  
GGGACTTACAGAG---CAGGCAGCCACTCACGCGTCTTCCAATGTTGTAA  
ATAGTCAGATGCGTTTGGGCTTTTTCGGGGACATGTATGGTAGAGCCGAG  
CAGTACGGCCATGTAACCTAGCCCCAGGT---CCGATCATTATGCTTCGAC  
CCAGTGCACGGCTATGGCCCCATGAACATGAAYATGGCTGCA---CACC  
ATGGGGCAGGGGCCTTCTTTCGTTACATGAGGCAACCGATAAAGCAGGAG  
CTCATCTGCAAATGGATCGAACCAGCAACATTGACGAACCCGAAAAAGTC  
TTGCAACAAAACCTTTCAGTACCATGCACGAGCTGGTTACGCACCTCACAG  
TGGAGCATGTTGGGGGACCAGAACAATCGAATCACATCTGCTTCTGGGAA  
GAGTGTCCCCGGGAAGGAAAACCTTTTAAAGCCAAGTATAAACTTGTA  
TCACATCAGAGTACATAACCGCGAGAAACCTTCCCGTGCCCTTTTCTCTG  
GCTGTGGCAAA

>Esox lucius

AGCCTTTTAAATCCGGGCCGAACCTAAGCCAGCCAGGGGCTCTCTTAGGTGA  
CGACCAGATTTATAATGTTATCGTTACAGCCCATGCCTTTGTTATAATCT  
TTTTTATAGTTATAACCGTTATAATTGGGGGTTTGGAAACTGATTAATT  
CCCTAATGATTGGTGGCCCCGACATGGCCTTCCCCGCATAAAATAATAT  
AAGCTTCTGACTTCTCCCCCTCTTTTACTTCTCTTAGCCTCCTCAG  
GTGTTGAAGCTGGTGTGTTACTGGCTGAACAGTTTATCCGCCTTTGGCC  
GGAACTTAGCACACGCAGGTGCTTCTGTAGACTTAACTATTTTCTCTCT  
CCACCTGGCCGGAATTTCTTCTATCTAGGAGCTATTAATTTTATTACCA  
CAATTATCAACATAAAACCCCGCCATCTCACAATATCAGACACCATTA  
TTTGTGTTGAGCAGTCTGATTACAGCTGTACTTCTACTTCTGTCTCTCCC  
AGTCTTAGCCGCTGGAATTACCATATTGCTCACAGACCGAAATTTAAACA  
CCACATCTTTGACCCCGCTGGTGGTGGAGACCTATTCTATAACCAACAC  
CTCNNNNNNNNNNNNNNNNNNNNNNNNNNNNNNNNNNNNNNNNNNNNNNNNNN

NNNNNNNNNNNNNNNNNNNNNNNNNNNNNNNNNNNNNNNNNNNNNNNNNNNNNNNNNNNNNNNNNNNNNNNNNNNNNNNNNNNNNNNN  
NNNNNNNNNNNNNNNNNNNNNNNNNNNNNNNNNNNNNNNNNNNNNNNNNNNNNNNNNNNNNNNNNNNNNNNNNNNNNNNNNNNNNNNN  
NNTTCTGGAGAGGAACCTGCACCCCTCCAACCTGCTGGGCATGCTGCT  
CCTGTCCGACGCCACCAGTGCACCAAACGTCTGAGCTCTCCTGGGGTA  
TGTGCCCTTGCAACTTCCCTGCTATCTGCAAGACAGAGGAATTCTGCAG  
CTTCCCAAAGACATGGCGGTGCAGCTGTTGTCCCATGAGGAGCTGGAGAC  
GGAGGACGAGAGGCTGGTTTACGAGGCCGCCCTCAACTGGGTCAACTACG  
ACCTGGAGAGGAGGCACCTGCCACCTGCCGAGCTGCTGCAGACCGTCCGC  
CTGGCCCTCCTTCCCAGCCTTCTCATGGAGAACGTGTCCACAGAGGA  
GCTCATCAACGCCAGCTGAAGAGCAAGGAGCTGGTGGACGAGGCTATCC  
GCTGCAAGCTGAAGATACTTCAGAACGACGGTGTGGTGAACAGCCCTGC  
GCCCCGCCAGGAAGACCAGCCACGCCCTGTTCCCTCTGGGAGGTCAGAC  
CTTTCATGTGTGACAAGCTGTACCTGGTGGACCAGAAGGCCAAGGAGATA  
TCCCCAAAGCAGACATCCCTAGCCCCAGGAAGGAGTTCAGCGCTTGCGCC  
ATTGGCTGTAAGGTCTATGTGACCGGTGGGA--GGGGCTC-CGAGAACGG  
CGTGTCCAAAGACGTGTGGGTCTACGACACCGTGCACGAGGAGTGGTCCA  
AGGCGGCACCCATGCTTATCGCCCCGTTTCGGCCACGGCTCGGCTGAGCTG  
AAACACTGCCTCTATGTGGTTCGGAGGGCACACCGCGGGTACAGGCTGCCT  
CCCTGCCTCTCCCTCGGGACGAGTACATTGTAAGTGTTCAGTCCGCTCAATC  
AACAGACTCATCTGAACGAAGCGGAGCTGATCATGGCGTGTGTCGAGGA  
GTTTTAGATGAGAACCGTAACAGTGTCTCTGGAAGAGCAAACCTTCCCCA  
GCATTGTCAAAGTATCAGCGGGGGCTCCATGTTGGTTCAGCATGCACGGG  
GCACAGCTGGTCTCTTCTCTTCTTCTTCCCTCCCCCGGGGGCTGTTGTAGTGGA  
ACTATTCCCTTACGCAGTCAACCCGGAGCAGTACACCCCTTACAAAACCC  
TGGCCCTCTTACCAGGCATGGAACCTGCAGTATGTGGCCTGGAGGAACATG  
GTGGAGGAGAACTCTGTGGCCTACCCGAGAGGCCCTGGGAGCAGGGAGG  
TATTGCTCATCTGGAGAAAGATGAGCAGGAGCGCATCTTGGCCAGTAAGG  
AGGTACCAGACACCTTGTGTGCCGCAATCCCGAGTGGCTCTACCGTATC  
TACCAGGACACTATAGTGGACATCCCTTCTTTACTGGAGGCTCTCAG---  
AGAGGCTGTGAAA---ATCAGGCCAAATTTGAAGAA---GGCCAAGCCGG  
CCAGCATGGTTACCCAGGCCGGGTTCAGAGAGCCTCTGTGCCAGACGTCA  
GTCCAGGCCACCAAGCAGGCCAAGCTGACCCTGTCTGGCAAATCCCTG  
GAACCTCAAGTACCTGAAGGTCAGGGAAGTGAAGTATGAAGTGTGGATCC  
AGAAGAGGGATCCCAGCAAGGGGACCCTAGAAGATCAAATCATCCAGGCC  
AACCTGCCTGAGGCTTTTGGTAATGCCAAAACAGTTAGAAATGACAA  
CTCATCACGTTTTGGCAAATTCATCCGTATTCACCTTGGAAACAAGTGGA  
AACTGTCTCTGTGATATTGAGACTTACCTTCTTGAGAAGTCCCGTATC  
ACCTTTCAGCTCAAAGCCGAGAGGAACTACCATAATTTTCTTCCAGATATT  
GTCCAACCAAAGCCAGAGCTGCTGGACATGCTGTTAATCACCAATAACC  
CATATGACTACTCCTACATCTCTCAAGGAGAGGTAACAGTAGCATCCATC  
AATGATTCGATGAACTGTTGGCTACTGACAGCGCCTTTGATGTACTCGG  
CTTTACTGCAGAGGAGAAACAGGGGTCTACAAGTTGACAGGTGCCATCA  
TGCATATGGCAAACATGAAGTTCAAAACAAAGCAGCGGGAGGAGCAGGCA  
GAGCCTGACGGTACAGAAGCTGCTGACAAGTCAGCATACCTAATGGGCAT  
TAACTCTGCAGATCTCATTAAGGACTTTGTCTCATCCAGAGTCAAGGTTG  
GCAATGAGTATGTTACCAAAGGTCAAGGAGTAGATCAGGTCTACTACCCC  
AACAAGGAGGCCTTCAAGTGCAGGAGTGTGGCAAGCACTACAACACCAA  
GCTGGGCTACAAGCGCCACGTGGCCATGCACTCGGCCACGGCCGGCGATC  
TCACCTGCAAGGTGTGTCGTGCAGAGCTACGAGAGCACGCCGGCCCTGCTG  
GAGCACCTGAAGAGCCACTCGGGCAAGTCATCCGGTGGCGCAAGGAGAA  
GAAGCACCCGTGCGACCACTGTGACCGGCGCTTCTACACCCGGAAGGACG  
TGCGCCGCCACATGGTTCGTGCACACCGGCCGCAAGGACTTCCTGTGCCAG  
TACTGCGCCAGCGCTTTCGGCCGGAAGGATCACCTCACACGTACAGTGAA



GAAGAGCCACTCGCAGGAGCTGCTGAAGATCAAGACGGAGCCCCGGACC  
TGCTGGGCTGCTGGGCTCCGGCTCGCCTGCCTGCACCGTCAAGGAGGAG  
CTCAACCCCGTGATGTGCAGCATGGGTCCCAGCAAGGACACCGTGATGAA  
CAAACCCTTCCCCGGCGGGCGGCCCTTCCCCATGGGCATGTACAACGCC  
ACCCG-----CTTCAGGCCATGCCCGGCCAGGCGGGGGGCAC-----  
---CACCACCTCCTGATGCCCGGCCCTCTCCGCCCATGGGGATGGG  
CTGTCACGTGGAGTACCTGATATATGCCTCCTTCTCCTTCATGGGATGTT  
TACAGATCAGCGACGGTTCCAACATTGTCAATCTCCTCGCCAGCAACACG  
CCCAGCGTCTCCTACGCCATGACACAGCAGAAGTACTTCAGTAACTACAG  
CCCGGTGATCGGCTTCTACATCTACGAGCCATAGAGTACTGGAACCCA  
CGGTGCAGGAGCACCTGACCACTCTGAGCCACGGCTTCAACAAGATCTCC  
TGGATGGATAACTACTTTTCAGTATCTGAAGGTGGTGAATGTGAGTGCCTC  
TACCAAAAAGTGATTTTCATCGCTATCCTGCAGGGATCCTTCCTGCGCAGCC  
CAGAGTATCAGCACTTCATGGAGGACATCATTCTGTCCAAGACGGACGGC  
G-----ACGAGATGGAGATCATCGCGTCGCGGATGTATCTGGT  
GGCACGGACCACAGAGAAGACAAGGGAGGAGGTGGTTGAGCTGCTGGAGA  
GGCTCCGCCCCCTCTCGCTCATCAACAACATCAAGTTCATCGTCTTCAAC  
CCCACCTTCGTCTTCATGGACCGCTACAGTTCCTCCGTGGTCTCGCCCAT  
CATCACGTGCGCCTTCAGCGTGCTCACCATCCTCGTCCTCACCTTCTTTC  
TGGTCATCAACCCCTGGGAACTTCTGGTTGATCCTGACCGTCACCTCC  
GTGGAGCTGGGGGTCTGGGTCTCATG-----  
-----  
-----CCATC  
CCTCGTCGGTTCGGATATGATGTGGCCCTGGTGTGCGCCCTAAAGGACCT  
TGAAGAGGATATTATGGAGGGGCCGAGGGAGCGAGGCCTGGAGGACAGTG  
TCTGTACCGCAGGCTTCAGTGTGGTGATTAAGGAGTCTGCGACGGCATG  
GGGGACGTGAGCGAGAAGCATGGTGGAGGCCGGGCCATCCCGAAAAAGC  
AGTGCGTTTCTCTTTCACCATCATGTCCGTCTCCCTCCAGGCGGAGGGAG  
AGGAC-----GAGGCGGTCAACATC  
TTCCAGGAGTCCAAGCCGAACCTCAGAGATGTCTGCAAGCCTCTCTGCCT  
GATGTTTGTGATGAGTACAGATCACGAAACGCTGACAGCTGTCTTGGGGC  
CCGTAGTGGCTGAAAGGAACGCCATGAAGAACAGTCTTATCTTGTCC  
CTGGGTGGACTTTCTCGCTCCTTCCGCTTCCACTCCGAGGCACGGGCTA  
TGATGAGAAGATGGTGCAGAGAGATGGAGGGTTGGAGGCCTCTGGCTCCA  
CGTACATCTGCACCTGTGCGACTCCACTCGGGCTGAAGCCTCTCACAA  
ATGACTCTCCACTCTGTACCCGCAACCACGACGAGAACCTGGAGCGCTA  
CGAACTCTGGAGAACCAACCTTATCTGAGTCTGTTGAGGAGCTGCGAG  
ACCGGGTGAAGGGCGTCTCAGCCAAACCTTTCATGGAGATCCAGCCCACC  
CTGGACGCGCTGCACTGCGACATAGGCAATGCCACTGAGTTCTACAAGAT  
CTTCCAGGATGAGATAGGGGAGATCTACGACAATCC---CAAC---CCCA  
GCAGGGAGCAGCGTCGGAGTTGGCGGGCTGCACTCGACAAGCAGCTAAGA  
CAGAAGATGAAGCTGAAGCCAGTGATGAGGATGAATGGAAATTATGCAAG  
GAGGCTGATGACCCGAGAGGCTGTGGAAGCGGTGTGTGAGCTGGTGCCTT  
CAGAGGAGCGTCAGGAGGCCCTGAGGGAACCTGATGGGGCTCTACCTCAAG  
ATGAAGCCTGTGTGGCGCTCCACATGCCCGGCCAAGGAGTGCCAGACCA  
ACTCTGCCAGTATAGCTTCAACTCCAGCGCTTCGCAGAGCTGCTTTCCA  
CAGTCTTTAAGTACAGGTATGATGGGAAGATCACCACCTACCTGCACAAG  
ACCTTGGCCCATGTGCCAGAGATTGTGGAGAGGGATGGCTCCATCGGGGC  
CTGGGCTAGTGAGGGAAATGAGTCTGGGAATAAGTCGTACACAATTGAGA  
TGGGCCCCAAAGGGCCTCAATGGAAAGACAGCCCTACCCCTTCTCCTGC  
TCCATCGAGGACCCCAAGCAGACTAAGTTCAAAGGCATTAAGACTTA  
CATATCCTACCGGGTGACCCCAAGCCACACAGGCAGGCCTGTTTACCGGC  
GTTACAAGCACTTTGACTGGTTGTACAACCGTTTACTGCACAAGTTCCT

GTCATCTCAGTGCCCCACCTGCCCGAAAAACAGGCGACAGGGCGCTTCGA  
AGAAGACTTCATCGAGAAGCGCAAGAGGCGGCTGATCCTTTGGATGGACC  
ACATGACCAGCCACCAGTCCTATCACAGTACGAGGGCTTTGAGCACTTC  
CTTATGTGTGCCGACGACAAGCAGTGGAAGCTAGGAAAACGGCGGGCGGA  
GAAGGATGAGATGATGGGCGCCAACCTTCATGCTCACCTTCAGATCCCCA  
ACGAGCACCAGGACCTGCAGGATGTGGAGGAACGCGTAGACTCTTTCAA  
TCCTTCGCCAAGAAAATGGACGACAGCGTCATGCAGCTGACACATGTGGC  
CTCGGAACTGGTGCGGAAGCACCTTGGAGGCTTCCGGAAGGAGTTCAGC  
GGCTGGGGAACGCGTTCAGAATGTTAGTCAGGCGTTCATGCTAGACCCT  
CCCCACTGCTCAGATGCCCTCAATACTGCCATCTCACACNNNNNNNNNNNTCTGCAGAATG  
TCTCTCCTCGGTTTTATCATCGGCGTCGGTGTGTGCGGCAATCTCCTGAT  
CTCCATTCTACTGGTCAAAGACAAAAGCCTGCACCGTGCACCCTACTACT  
TCCTGCTCGACCTGTGCGCCTCGGATATCCTGCGCTCAGCCATCTGCTTC  
CCCTTTGTCTTACCCTCCGTCAAGAATGGTTCCACCTGGACGTACGGCAC  
GCTGACCTGCAAGGTGATCGCCTTCCCTCGGAGTGCTGTCCTGCTTTCACA  
CGGCGTTCATGCTCTTCTGTGTGAGCGTGACACGCTACCTGGCCATAGCC  
CACCACCGCTTCTACACCAAGAGGCTAACCTTCTGGACGTGTCTGGCAGT  
CATCTGCATGGTGTGGACATTGTCTGTGGCCATGGCCTTCCCGCCAGTGC  
TGGACGTGGGGACGTACTCCTTTATAAAGGAAGAGGACCAGTGTACATTC  
CAGCATCGCTCGTTCGAGCCAACGACTCCCTGGGCTTTATGTTGCTCCT  
AGCCCTCATCCTCCTGGCTACGCAGCTTGTCTACCTCAAGCTAATCTTCT  
TCGTCCACGACCGCCGGAAGATGAAACCGGTCCAGTTTGTACCTGCCGTC  
AGCCAGAATTGGACCTTCCATGGTCCCGGGGCTAGCGGCCAGGCGGCGGC  
CAACTGGCTAGCGGGTTCGGCAGGGGCCCCACCCCTCCACCCCTGCTAG  
GCATCAGGCAGAACAGCAACGCGGCCGGCAGGCGACGCCTGCTTGTGCTG  
GATGAGTTTAAACTGAAAAGAGGATAAGTAGAATGTTCTACATCATGAC  
CTTCTTCTTCTCACTCTGTGGGGACCCTATCTGGTGGCCTGCTATTGGA  
GAGTGTTTGCCAGGGGCCCGGCGGTCCCTGGGGGTACCTGACTGCTGCG  
GTGTGGATGAGCTTTGCCAGGCGGGTGTAAATCCCTTCATCTGCANNNNNNNNNNNNNNNNNNNACT  
C  
TCGCTTTCACCCTGGCGTAGGGACCGGTCCTGGCACGGACC---GCAGCG  
TCCCACCTTAGTAACAGCTTGCTATCCAGCAACAAACCGAAGAGCCGACA  
GTTG---CATCCCCGCAGCGATGGTTTGTACCC---CTGCCAACAACCG  
ACTGGACTTTGCAGCCTCGGCATACGACGCGGCCGAGCTGCTGATTTTG  
CCGGTAACGCGGCCACCCTCCTGTCTACGCAGCGGCTGGAGTAAAGGCA  
C-----TTCCTCTTCTACCAGGTTGCTCAAACAGGCCTCTAGGTTA  
CTATGCCGACCCATCCG---GCTGG---GGCACACGCACACCACCCAGT  
ACTGC-----AGTAAGTCTAGCTCTGTTCTCTTCTGCTGGCCTACA  
AATTCGGTTGGTGGCAGAACAGGCA---CCTCCAACCTACCTGG-----  
--TTGATGA---CGCG---GAAGC---GATTCCAACGGAGAGGTCACCC-  
--AT---CGGTGGGTCGGATGAG---GCAAAACCAAAGATTT-----A  
TCCGA---ACCCAACCTGGATAGAG---ACGCCGTCTTCGATAAAGTCTAT  
TGACTCAAGTGATTCTGGGATCTTTG---AGCAAGCCAAACGGAGAAGAA  
TTTCACCGACTGCCACACCG-----GTAACGGAAACAGTGTCCCAG  
TTGAAATCTGAG-----ACAGGCGAAGTCACTGAAAGAGAAGTTGC  
TTTGGGGATAAATCCGTTTGCAGACGGGATGGGCGCTTTTAAATCAACC  
ACAGCTCTCACGACCTAGGCTCCGG---CCAAACGGCGTTCCTCACA  
GCA---CCTGGCTAC---GCCGCCGACGACTGGGT---CACCACCA---  
---CCACCCGACACACGTTAGCTCG---TACTCCACCGCAGCGTTCAACT  
CAACCCGGGACTTTCTCTTTCAGAAAACCGGGGCTTCGGGGACGCGGCCAG-  
-----CGCGCAGCACAGCCTCTTCGCTCAGC---AGCGGGAAG  
TTT---T-----GCTGGACCACACGGACACTCAGATAACGCGGGGCACC  
TGCTCTTCCCGGACTTCATGAG---CAAGCCGCGAGCCATGCGTCCCTCG

AATGTAGTCAACAGCCAGATGCGACTGGGCTTTACCGGGGACATGTACGG  
CCGGGCTGACCAGTATGGCCACGTTACCAGCCCCGCT---CCGACCACT  
ATGCATCCACCCAGCTCCACGGCTACGGCCCCATGAACATGAATATGGCG  
GCT---CATCACGGAGCTGGGGCTTCTTCAGATACATGAGGCAGCCGAT  
CAAACAAGAGCTCATCTGCAAATGGGTGCAACCCGGAGCAGTTGTGCAACC  
CCAAGAAGTCTTGCAACAAAACGTTTCAGCACGATGCACGAGCTGGTGACC  
CATCTTACGGTGGAGCACGTCGGTGGACCCGGAGCAGTGAACCATATCTG  
TTTTTGGGAAGAGTGTGTCCGAGAAGGAAAACCATTTAAAGCCAAGTACA  
AACTTGTAATCACATCAGAGTGCACACTGGAGAAAACCATTTCCCATGT  
CCATTTCCCGGTTGTGGCAA

>Etheostoma atripinne

AGCTTACTTATCCGAGCCGAACCTCAGCCAACCGGGCGCACTCCTTGGAGA  
CGACCAGATTTATAACGTAATTGTTACAGCGCATGCCTTTGTAATAATTT  
TCTTTATAGTGATAACCAATTATGATTGGGGGTTTTGGTAACTGACTCATT  
CCACTCATGATTGGCGCTCCCGACATGGCATTTCCTCGGATGAACAATAT  
GAGCTTTTGACTTCTCCCCCTTCTTCCTTTTACTTCTTGCCCTCCTCAG  
GAGTAGAAGCAGGGGCTGGAACCGGGTGAACCGTTTACCCCCACTGGCT  
GGGAACCTGGCACACGCCGGGGCATCAGTAGATTTAACTATTTTTTCCCT  
ACACCTGGCGGGGATCTCTTCGATTCTAGGTGCCATTAATTTTATTACGA  
CAATTATTAACATAAAAACCCCCAGCCATCTCGCAGTACCAGACGCCCTG  
TTCGTATGGGCTGTTCTAATTACCGCGTACTTCTTCTACTTTCCCTCCC  
GGTGCTTGCCGCGGGTATTACCATGCTCCTTACGGATCGCAACTTAAATA  
CCACCTTCTTTGACCCCGCAGGAGGGGGGATCCCATCCTCTATCAACAC  
CTC-----  
-----  
-----  
-----

-----TTCTAGAAAGAAACCTTACCCAACCTAACTGCCTTGG  
CATGCTGTTACTGTCTGACGCTCACCAGTGCACCAAGCTGTCAGAGCTCT  
CCTGGGGTATGTGCCCTCAGCAACTTTCCTCGCTATTTGCAAGACAGAGGAC  
TTCTTCCAACCTGCCCAAAGATATGGTTGTGCAGCTTTTGTACATGAGGA  
GCTAGAGACAGAAGATGAGAGACTGGTTTATGAAGCTGCTCTTAACTGGA  
TCAACTATGACCTGGAAAAGAGACACTGCCACCTTCCAGAGCTCCTAAAA  
ACGGTCCGCCTGGCCTTGCTGCCTGCCATCTTCTCATGGAGAACGTGTC  
TACAGAAGAGCTGATCAACGCAAAGCCCAAGAGCAAAGAGCTTGTGGATG  
AAGCTATCCGCTGTAAGCTGAAGATCCTGCAAAACGATGGCGTGGTTAAC  
AGCCCGTGTGCTCGACCAAGAAAGACCAGCCATGCCTTATTTCTTCTGGG  
AGGGCAGACTTTCATGTGCGACAAGTTGTACCTGGTGGACCAGAAAGCCA  
AAGAGATCATCCCCAAGGCCGACATTTCCAGCCCCAGGAAGGAGTTCAGC  
GCCTGCGCCATCGGATGTAAGGTGTACATCACTGGTGGGA--GAGGCTC-  
AGAGAATGGTGTGTCCAAGATGTGTGGGTCTACGACACCGTCCAAGAGG  
AATGGTCAAAGGCAGCACCCATGCTCATTGCCAGGTTTGGCCATGGCTCT  
GCAGAGCTGAAACACTGCCTCTACGTGGTAGGAGGTCACACGGCAGCAAC  
TGGCTGCCTCCCAGCTTCTCCTTCTGGCTGAATACATAGTTGTGTTAGT  
CGTTCAGCAACGAGGCTGATTGTGAATGAAGCAGAGCTAATCATGGCACT  
AGCCAGGAGTTCCAGATGAGAGTGGTCACAGTGTCCCTGGAGGAACAGT  
CTTTCCCTGGTGTGTCAGGTGATCAGCGGGGCGTCCATGTTGGTCACT  
ATGCATGGGGCTCAGCTGATCACCTCACTCTTCTTCCCAAAGGAGCTGC  
TGTAAGTGGAGCTGTTCCCTTTTGCAGTAAACCCAGAGCAGTACACCCCGT  
ATAAAACCCTAGCCACCCTCCCAGGCATGGACCTTCACTACATCTCCTGG  
AGAAAACCAAGGAGGAGAACACCATCACCCACCCAGACAGACCCCTGGGA  
ACAAGGAGGCATCACTCACTTGGAGAAAAGAGGAGCGAGAGCGAATACTGG  
CGAGCAAAGATGTCCCCGACACCTGTGCTGCCGCAACCCAGAGTGGCTC



TTTTCTATCACTATTATGTCTGTCTCTGTCATAGCAGACGAGGAGGAG--  
-----AAAGAGGTTACCATCTTCACTG  
AGCCAAAACCAAACCTCAGAACTGTCCCTGTAAGCCCTTTGCCTGATGTTT  
GTGGATGAGTCAGACCATGAGACGCTGACAGCCGTCCTGGGGCCTATAGT  
TGCAGAGCGTAATGCAATGAAAGAGAGCAGGCTCATCATATCCATGGGTG  
GACTACYTCGCTCCTTTCGCTTTCAC T TCCGAGGCACGGGATATGATGAG  
AAGATGGTGCGTGAGATGGAGGGCCTCGAGGCCTCAGGATCCTCCTATGT  
GTGCACTCTTTGTGACTCCACTCGGGCAGAGGCCTCTGAAAACATGGTGT  
TACAT TCCGTCACCCG CAGTCATGSAGAGAACC TAGATCGGTACGAAATA  
TGGAGAACCAATCCTTTTTCTGAGTCTGTTGATGAGCTGCGAGACAGAGT  
TAAGGGGGTCTCTGCCAAGCCCTTCATGGAGACCCAT TCCACACTGGATG  
CATTGCACTGTGACAT TGGCAATGCCACTGAGT TCTACAAAATCTTCCAG  
GATGAGATCGGAGAGGTGTACAAAAGGGGT---CAAC---CCCAGTCGGGA  
GGAACGGGCGCAGCTGGAGGGCAGCCCTAGATAAACAGCTGAGGAAGAAGT  
TGAAGCTGAGACCGGTGATGAGGATGAATGGCAACTATGCCCGGCGGCTA  
ATGACCCAAGAGGCTGTGGAGGTGGTGTGTGAGCTGGTGCCCTCAGAGGA  
GAGGAGGGAGGGCCCTGAGGGAGCTCATAAGGCTCTACCTCCAGATGAAGC  
CTGTTTGGCGCTCCTCCTGCCCTGCCAAGGAGTGC CCCGACCAGCTGTGT  
CGCTACAGCTTTAACTCCCAGCGCTTTGCTGACATTCTCTCCTCTACATT  
TAAATATAGGTATGATGGAAAGATAACCAATTACCTGCACAAGACCCTGG  
CCCATGTGCCTGAAATCATAGAGAGAGAYGGATCCATAGGANNNNNNNNNNNNNNNNNNNNNNNNNNNNN  
NNNNNNNTCGTACACC  
ATCGAGATGGGTCCCATGGGGCCCTGTGGAAGGAGAGCCACAGCCTTT  
CTCCTGCTCCATTGAAGACCCCACAAAACAGACAAAAGTTCAAAGGCATCA  
AGACGTACATTTCATAACAGGGTCACACCAAGCCACACGGGGCGTCCCCTC  
TACAGGCCTACAAACACTTTGACTGGCTGTACAACCGTTTACTGCACAA  
GTTCACTGTGATCTCCGTGCCTCACC TGCCTGAGAAGCAGGCCACGGGGC  
GATTTGAGGAAGACTTCATCGAGAAGCGCAAGAGACGACTGATACTGTGG  
ATGAACCACATGACCAGTCACCCAGTCCCTCTCCCAATATGAAGGCTTCGA  
GCACTTTCTGATGTGTGCTGATGACAAGCAGTGGAAACTGGGCAAGAGAC  
GGGCGGAGAAGGATGAGATGGTGGGTGCCCATTTTCATGCTGACCTCCAG  
ATCCCTAATGAGCACAGGACCTACAGGATGTAGAGGAGCGGATCGACAC  
CTTCAAGGCCTTCGCTAAGAAAATGGATGACAGTGTGATGCAGCTCACAC  
ATGTTGCCTCGGAGCTGGTGCGTAAGCACCTGGGTGGATTTAGGAAGGAG  
TTCAGCGGCTAGGTAATTCATTCCAGTCCATCAGCCAGGCTTTCATGCT  
GGACCCTCCCCACAGCTCAGAGGCCCTCAACAAAGCAATCTCCCATNCTCT  
CGCTACGTTCCCTCAAAC T GACCTCTCTGGGTTTCATCATTGGAGTCGGTG  
TGTTTGGTAACCTCCTAATCTCCATCCTGCTGGTCAAAGACAAGAGCCTA  
CACCGGGCGCCCTACTATTTCCCTGTTGGACCTCTGCGCCTCTGACATCCT  
GCGCTCCGCCATCTGCTTCCCCTTGTCTTACCTCGGTCAAGAATGGAT  
CAGCCTGGACCTATGGCACGCTGACCTGCAAAGTGATCGCCTTCTGAGG  
GTGCTGTCCCTGTTTCCACACGGCGT TATGCTKTTCTGTGTCA GTGTCAC  
GCGTTACCTGGCAATCGCACACCACCGTTTCTACACCAAGAGGTTGACCT  
TCTGGACTTGCTAGCTGTCATCTGCATGGTGTGGACGTTATCAGTGGCA  
ATGGCGTTCCCGCCGGTGT TAGACGTAGGGACGTA CTCTTTTATCCGGGA  
GGAGGACCAGTGCACGTTCCAGCATCGTTCCTTCAGGGCGAATGATTCGC  
TGGGCTTCATGCTCCTGCTGGCGCTCAT TCTCCTGGCCACACAGCTGGTT  
TACCTCAAGCTCATCTTCTTTGTCACGACCGTCGAAAGATGAAGCCAGT  
CCAGT TGTGCCTGCTGT CAGCCAGAACTGGACCTTCCACGGGCCAGGCG  
CCAGCGGGCAGGGCGCAGCCAACTGGCTGGCTGGATTCCGGTCGAGGCCCC  
ACCCCGCCTACCTTGCTGGGCATTCGGCAGAACAGCAACGCAGCGGGCCG  
CAGGCGTCTACTGGTGTGGATGAATTCAAACAGAGAAGAGGATAAGTA  
GGATGTTCTACATCATGACGTTTTCTTCTCCTGGCACTGTGGGGGCCCTAT











-----  
-----  
-----  
-----  
-----

>Eurypharynx pelecanoides

AGCCTATTAATTTCGCGCTGAACTTACTCAACCAGGAGCCCTTCTTGGAGA  
TGATCAGATTTATAATGTTATCGTAACAGCCCATGCTTTTGTAAATAATTT  
TCTTTATGGTGATAACCAATTATAATCGGAGGATTCGGCAATTGACTAATC  
CCCCAATAATTGGAGCCCCAGACATAGCATTCCCCCGTATGAACAATAT  
AAGCTTCTGACTTCTCCCCCTCATTTCTTCTCCTTTTAGCCTCTTCCG  
GGGTAGAAGCCGGAGCCGGCACAGGGTGAACCGTTTATCCTCCCCTAGCT  
GGAAATTTAGCTCATGCCGGAGCATCAGTAGATTTAACAATCTTCTCACT  
TCATCTTGCAGGAATCTCCTCAATTCCTGGGGCCATTAATTTTATTACGA  
CCATTATTAATATAAAAACCCCCAGCCATTTACAAATACCAAACACCCCTT  
TTTGTTGATCTGTGTTAGTCCCGCTGTCCTTACTCTTATCCCTCCC  
CGTCCTAGCTGCGGGCATCACAATACTCCTAACTGACCGAAACTTAAACA  
CAACATTCCTTTGATCCTGCAGGAGGGGGGACCCCATCCTTTACCAACAC  
CTATTCTGATTTTTTGGGCACCCAGAAGTTTATATCTTAATTTTACCCGG  
ATTCGGAATAATTTACACATTATTACCTATTACTCGGGCAAAAAAGAGC  
CCTTCGGATATATGGGCATAGTTTGAGCCATAATAGCCATTGGCCTATTA  
GGCTTCATCGTATGAGCCCACCATATATTCACGGTTGGCATAGATGTAGA  
CACCCGTGNNNN-----

-----  
-----  
-----  
-----  
-----  
-----  
-----  
-----  
-----  
-----  
-----  
-----  
-----  
-----  
-----  
-----  
-----  
-----  
-----

-----AGGCGAGTATATTGTGGTATTCAGTCGCT  
CTCTTAATAGGCTGATCCTGAATGAGGCAGAGTTGATCCTGGCACTAGCG  
CAAGAGTTCAGATGAAGGCCGTTACTGTTTCCCTGGAAGAGCAGTCCTT  
TGCAGACATCGTCCGAGTCCTCAGCAGGGCGTCCATGCTGGTCAGTATGC  
ACGGGGCCCAGCTTGTCACCTCTCTTTTCCCTTCCCTCGTGGGGCCGCTGTG  
GTGGAGCTATACCCATATGCAGTCAACCCAGAGCATTATGCTCCCTACAG  
GACACTGACCTCGCTGCCAGGCATGGACCTGCAGTATGTGGCCTGGAGGA  
ACACCAGGGAGGAGAACTCTGTTACCTTCCCTGAGCGTGCTTGGGACCAG  
GGTGGCATTGCACACTTGGAGAAGGAGGAGCAGGCACGTATCATGAAGAG  
CAAGGAGGTGCCGCGACACCTGTGCTGTGCGGAACCCGGAGTGGCTCTTCC  
GCATCTACCAGGACACCAAGGTGGACATTGCGTCTCTTCTGGATGCCCTG  
CG---CCAGGGACTGACC---TCCAGGCCAGGGCCCAAGAG---GGCTAG  
GCCTGCCAGCACAGTCCACCCAGGCAGGGTGGAGGGAGCCCAAGTGCCAGA

CCTCCGTCCAGGCCACTAACGAGGCCACGCTGACCGTTTCTTGGCAGATC  
CCCTGGAACCTCAAATACCTGAAGGTGAAGGAGGTGAAGTATGAGGTATG  
GATTCAAAGAAGGATACCAGCAAGGGGACCCTGGAGGATCAAATTATCC  
AGGCAAACCCAGCGCTGGAGGCTTTTGGCAATGCCAAGACTGCGAGGAAT  
GACAACTCCTCACGTTTGGGAAATTTATTCGCATTCATTTTGGAGTAAG  
TGGCAAGCTGTCTCTGCTGATATAGAAACCTACCTACTCGAGAAATCTC  
GTGTCACTTTTAGCTTAAATCTGAGAGGAACTATCACATTTTCTACCAG  
ATCACATCCAACAAAAAGCCAGAATTGCTGGACATGCTGTTGATCACCAA  
CAACCCCTACGATTATGCTTATGTCTCCCAAGGAGAGGTGACAGTTGCAT  
CCATTGATGACTCAGAGGAACTGATCGCCACAGACAATGCCTTTGATGTG  
CTGGGCTTACGGCGGAGGAGAAGATGGGTGTGTATAAGCTAACGGGTGC  
CATCATGCATTATGGAAACATGAAATTC AAGCAGAAGCAGCGTGAGGAGC  
AGGCCGAGCCTGATGGCACTGAGTCTGCTGACAAGTCAGCCTACCTGATG  
GGGCTGAACCTCTGCTGACCTTCTCAAGGGAATCTGCCATCCACGGGTAA  
AGTTGGAATGAGTTTGTACCAAAGGTCAAATGTGGATCAAGTCTACT  
AT-----

-----NNNNNGATCTATGCCTCATTTTCTTTCATGGGATGTT  
TACAAATCAGTGATGGGTCGAACATAGTCAACCTCCTGGCCACCAACTCC  
CCAAGCGTATCCTACGCTCTGACCCAGCAGAAATACTTCAGCAACTACAG  
TCCGGTCATTGGGTTCTACATCTACGAACCCATTGAGTACTGGAACGCCA  
CGGTCCAAGAGCACCTGATGACACTGGGCCACGGATTCAATAAGATTTTCG  
TGGATTGACAACCTTTTCAGTATCTGAAGGTGGTGAATGTCACCGTGTG  
GACGAAAAGCGAATTCATAACCGTCCTCCAATCCTCCTCCTGAGAAGCC  
CCGAGTACCAGCACTTTAAGGATGACATCATATTTTACAAAA---TGAGG  
G-----ACGAGACGGAGATAATTGCGTCCCGGATGTATCTGGT  
GGCCCGAACCACGGAGAAGACCCGAGAGGAGGTGGTGGAGCTCCTGGAGA  
GACTGAGACCGCTCTCTCATCAACAGCATCAAATTCATCGTCTTCAAC  
CCAACCTTCGTCTTCATGGATCGGTACAGCTCGTCGGTCATTTCCCCCAT  
CCTTACCGCGGGCTTCAGTGTCTGATCGTCTGATCCTGACCTTCTTCC  
TGGTTATCAACCCACTGGGAAACTTCTGGCTGATACTGACGGTCACCTCA  
GTGGAGCTGGGAGTCTGGGCCTAATG-----



-----  
-----  
-----  
-----  
-----  
-----  
-----  
-----  
-----  
-----  
-----  
-----  
-----  
-----

TTTGCTGACGGGATGGGAGCTTTCAAATCAACCATGGTACTCACGAACT  
TAGTTCTGG---ACAACTGCTTTCTCTTCGCAGACT---CCGAGCTAC-  
-GCAGCAGCTGCTTTGGGG---CATCACCA-----CCACCCGGCTCAT  
GTCAGCTCC---TACTCAACCGCCGCTTCAACTCCACCAGGGACTTTCT  
GTTCCGAAATCGGGGATTCGGCGACGCAGCAAG-----CGCAC  
AACACAGTCTTTTTGCCTCAGC---GGCAGGAACTTT---C-----GCA  
GGGGTTCATGGACTACTCAGATGCCACCGGACACCTTCTATTCCC GGACT  
GCACGAG---CAGACAGCCACACATGGGTCTCCGAACGTTGTAAATGGCC  
AGATGCGCCTGGGGTTTACCGGGGATATGTACGGCAGAGCAGAACAGTAT  
GGGCAGGTGACGAGTCCAAGGT---CTGAACACTATGCATCGACACAGTT  
GCACGTTATGGTGCTATGAAC-----ATGGCTGCA---CACCACGGGG  
CTGGGGCCTTTTTTCGATTCATGAGGCAACCGAATAACAAGAGCTCATC  
TGCAAATGGATAGAACCGGACCAGCTGTCGAATCCCAAAAAGTTTTGTAA  
CAAAACGTTTACGACCATGCACGAGCTCGTGACTCACCTCACTGTTGAAC  
ATGTTGGGGGGCAGAACAGTCAAATCACATCTTCTTTTTGGGAAGAATGT  
CCCCGGGAAGGCAAGCCATTTAAACCAAATAACAAGTTT-----  
-----

-----  
>Evermannella indica

NNNNNNNNNNNNNNNNNNNNNNNNNNNNNNNNNNNNNNNNNNNNNNNNNNNNNNNACCAGATTTACAATGTAA  
TCGTCACCGCCCACGCTTCGTAATAATCTTC  
TTTTATAGTAATGCCAATTCTGATCGGTGGCTTTTGAAACTGACTAGTTCC  
CCTGATACTCGGTGCGCTGATATGGCATTCCCACGAATGAACAACATGA  
GCTTTTACTCCTTCCACCTCCTTCTTCTCCTTGCCCTCTTCGCC  
GTTGAAGCAGGGGGCGGTACGGGTGAACCGTTACCCCTCTAGCCAG  
CAACCTGGCTCACGCTGGAGCCTCCGTTGACCTAACCATTTCTCTCTCC  
ATCTTGCCGGCATCTCCTCCATCCTGGGAGCCATTAACCTCATCACAAACC  
ATTATTAACATGAAACCCAGCCATCACACAATAACAAACCCCTGTT  
TGTGTGAGCCGTGCTCACTACTGCGTTCTTCTTCTTTCCCTCCCTG  
TTCTAGCAGCAGGGATTACCATGCTCCTCACGGACCGCAATTTAAATAACA  
ACTTCTTTGATCCTGCGGGCGGAGGGGACCAATTTCTTTACCAACACCT  
ATTCTGATTTTTCGGCCATCCAGAGGTATACATCCTTATTCTCCCCGGCT  
TCGGTATTATCTCTCACGTTGTCGCTACTACGCGGGGAAAAAGAACC  
TTTGCTACATGGGGATGGTCTGGGCCATGATGGCAATCGGCCTCTAGG  
ATTT-----  
-----TTCTGGAGAGGAACCTGCACCCCTCCAACTGCCTGGGCA  
TGCTGCTGCTGTGCGACGCCACCAGTGCACCAAGCTGTGCGGAGCTGTCC  
TGGGGGATGTGCTCGGCAACTTCCCAGCCATCTGCAAGACGGAGGACTT  
CCTCCAGTTGCCCAAAGACATGGTGGTGCAGCTCCTGTCCCACGAAGAGC

TGGAGACGGAAGACGAGAGGCTGGTTTACGAGGCGGCCCTGAACTGGGTC  
AACTATGACCTGGAGAGGAGACTGCCACCTGCCGGAGCTGCTGAGAAC  
CGTGCCTCTGGCCCTGCTTCCCTGCCATCTTCCCTCATGGAGAACGCTCCA  
CGGAGGAACTKATCAACGCCAGGCAAGAGCAAGGAGCTGGTGGACGAG  
GCCATCCGCTGCAAGCTGAAGATCCTGCAGAACGACGGCGTGGTCAACAG  
TCCCTGCGCCCGGCCAGAAAGACCAGCCACGCCCTCTTCCCTGCTGGGGG  
GGCAGACCTTCATGTGTGACAAGCTGTACCTGGTGGACCAGAAGGCCAAA  
GAGATCATCCCCAAGGCGGACATCCCCAGCCCCAGGAAGGAGTTCAGCGC  
CTGCGCCATCGGCTGTAAGGTGTACGTCATGGGCGGCA--GAGGCTC-CG  
AGAACGGCGTCTCTAAAGACGTGTGGGTATACGACACCGTCCACGAGGAG  
TGGTCCAAGGCGGCGCCGATGATCATCGCCAGGTTCCGGCCACGGCTCCGC  
CGAGCTCAAACACTGCCTCTACGTGGTCCGAGGACACACCGCGGCCACCG  
GCTGCCCTCCCCGCTCTCC----GGACGAGTACATCGTGGTGTTCAGCCG  
CTCCTCCACGCGGCTGATCCTGAACGAGGCGGAGCTGATCCTGGCGCTGG  
CCCAGGAGTTCCAGATGCGGGTGGTGACGGTGTCCCTGGAGGAGCAGTCC  
TTCCCCGGCATCGTGCAGGTCATCAGCGGGGCTCCATGTTGGTCAGCAT  
GCACGGCGCGCAGCTCGTACCTCGCTCTTCCCTCCCCAGGGGGGCGCCG  
TGGTGGAGCTCTTCCCCACGCCGTGAACCCGGAGCAGTACACCCCGTAC  
AAGACCCTGGCCTCCCTGCCGGCATGGACCTCCAGTACGTCTCCTGGAG  
GAACTATGGAGGAGAACACCGTCGCCACCCGGACAGAGCCTGGGACC  
AGGGAGGCATCACCCATCTGGAGAAAAGAGGAGCAGGAGAGAATCCTGGCC  
AGCAAGGACGTCCCCAGGCACCTGTGCTGCCGAACCCGGAGTGGCTCTT  
CAGGATCTACCAGGACACTCTGGTGGACATCCCCCTCCTTGCTGGAGGTCC  
TCAA---GGAGGGCTGAAG---ACGAGGCCGAGCTTGAAGAA---GTCC  
AAGCCGGCCAGCACGTTTACCCGGGCGCGTCCGAGAGCCCCAGTGCCA  
GACTTCGGTCCAGGCCACCAACGAGGCCAAGCTCACGGTGTCTGCGAGA  
TCCCCGTGGAACCTCAAGTACCTGAAGGTGCGAGAGG-----  
-----AAAAAGGACACAAGCAAGGGAACCCCTGGAGGATCAGATCAT  
TCAGGCGAACCCCTGCGCTGGAGGCTTTCGGTAACGCCAAAACACTGAGGA  
ACGATAATTCCTCCCGTTTTTGGAAAATTCATCCGAATCCACTTCGGAACC  
AGCGGTAAATTGTCTCGGCGGACGTTGAGACGTACCTGCTGGAAAAGTC  
GAGGTCACCTTTCAGCTCAAGGCCGAGAGGAACTACCACATCTTCTTCC  
AGATCTTGTCCAATCAAAGCCAGAGCTGCTGGACATGCTGTTGATCACC  
AACAAACCCTTACGACTACTGCTACATCTCCAAGGAGAAGTGACCGTAGC  
GTCCATCAACGACTCCGAAGAGCTGATGGCCACCGACAGTGCCTTCGACG  
TGCTCGGCTTACGCAAGAGGAGAAGATGGGAGTCTACAAGTTGACAGGG  
GCCATTATGCACTATGGCAACATGAGGTTCAAGCAGAAGCAGCGGAGGA  
ACAGGCGGAGCCTGATGGCACAGAAGCTGCCGATAAGTCGGCTTATCTAA  
TGGGGCTGAATACAGCAGACCTAATCAAAGGTCTCTGCCATCCCAGAGTC  
AAGGTAGGAAACGAGTATGTACCAAAGGCCAGGGTGTGGATCAAGTCTA  
CTAC---ACAAGGAGGCGTTCAAGTGCAGGAGTGCAGGCAAGCATTACA  
ACACCAAGCTGGGCTACAAGCGCCATGTGGCCATGCACTCGGCCACCGCG  
GGCGACCTCACCTGCAAGGTGTGCATGCAGAGCTACGAGAGCACCCCGT  
GCTGCTGGAGCACCTCAAGAGCCACTCGGGGAAGTCGTCCGGCGGCGCCA  
AGGAGAAGAAGCACCCGTGCGACCACCTGCGACCGCGCTTCTACACGCGG  
AAGGACGTCCGGCGGCACATGGTCTCCACACGGGCCGCAAGGACTTCCT  
GTGCCAGTACTGCGCCCAGCGCTTCGGCCGCAAGGACCACCTGACGCGGC  
ACGTGAAAAAGAGCCACTCGCAGGAGCTGCTGAAGATCAAGACGGAGCCG  
CCGGACATGCTGGGTCTCCTGGGCTCCGGCTCGCCCGCGTCTCCGTCAA  
GGAGGAGCTGAGCCCCATGATGTGCAGCATGGGTCCCAACAAAGACCCCA  
TGATGGGCAAGCCCTTCCCCAGCGGGACGCCCTTCCCCATGGGCATGTAC  
AACCCGCACCAC-----CTCCAGGCCATGTCTAACCCCGGGTCCGGCA  
CCCG-----CACCCCTCCCTCATGCCCGGCTCCCTGTCCGCAGCCATGG

GCATGGGCTGTCACATGGAG-----

-----

-----

-----

-----

-----

-----

-----

-----

-----

-----

-----

-----

-----

-----

-----

-----

-----

-----

-----

-----

-----

-----

-----

-----

-----

-----

-----

-----

-----

-----

-----

-----

-----

-----

-----

-----

-----

-----

-----

-----

-----

-----

-----

-----

-----

-----

-----

-----

-----

-----

-----

-----

-----GGCTACCACGCGTTTCG

AGTGGCAGCCGGCCCTCCGGAACGTGTCCCCCTCTGCCACGTGGGTATC

ATCAACGGGCTTTCCGGGTGGGCCGCTTCGGTGGACGAGGTCCCCGCCGA

CACCATTACCCGTCGGTTCGGCTACGACGTGGCCCTCGTGTGGCCCTGA

AGGACCTGGAGGACGACATCGTGGACGGGCTGAGGGAGCGCGGGCTGGAA

GACAACCCTTGACCTCGGGCTTCAGCGTCATGATCAAGGAGTCTGCGA

CGGCATGGGAGACGTCAACGAGAAGAACGGCGGGGGGCCGGCGATGCCCG

AGAAGGCCGTGCGTTTCTCCTTCACCGTCATGTCCGTCTCCGTCCGCGCC

GACGGAGAGGAG-----GAGGCGGT

CGTCGTCTTCAGGGAGCCGAAGCCCAACTCCGAAGTGTCTGTAAAGCCC

TGTGCCTGATGTTTGTGGACGAGTCTGACCACGAGACGCTCACGGCTGTC

CTGGGACCTTTGGTGGCGGAGAGGAACGCGATGAAGCAAAGCCGACTCAT

CCTCCCCGTGGGGGGGCTCCCCGCTCCTTCGGCTTCCACTTCAGAGGCT

CGGGCTACGACGAGAAGATGGTGCAGAGATGGAAGGCCTGGAGGCCTCG

GGCTCCACCTATATCTGCACCCTCTGCGACTCCACCCGGGCGGAGGCCTC

TCACAACATGGTGCTCCACTCCATCACGCGCAGCCACGACGAGAACCTGG

AGCGCTACGAGACGTGGAGGACCAACCCCTTCTCCGAGTCCGCCGCGGAG

CTGCGAGATCGGGTCAAAGGGGTCTCCGCCAAACCGTTCATCGACACCCA

TCCGACGATGGACGCGTTGCATTGTGACATCGGTAACGCCACCGAATTCT

ACAAGATCTTCCAGGATGAGATCGGGGAGGTGTTCCGGAAGGCCAACAAC

---CCCAGCCGGGAGGAGCGGCGGGCTGGCGGGCGGCTCGACAAACA

GCTGAGGAAGAAGCTGAAGCTGAAGCCGGTGTGCGGATGAACGGGAACT

ACGCCGAAGGCTGATGACCAGGAGGCGGCGGAGGCGGTGTGCGAACTG

GTGCCCTCGGAAGAGAGACGGGAGACCCTGAGGGAGCTGATGGCGCTCTA

C-----

-----

-----

-----

-----

-----

-----

-----

-----

-----

-----

-----

-----

-----

-----

-----

-----

-----

-----

-----









-----  
-----  
-----  
-----  
-----  
-----  
-----  
-----  
-----  
-----  
-----  
-----  
-----  
-----  
-----  
-----  
-----  
-----  
-----  
-----  
-----  
-----  
-----  
-----TCATACACC  
ATCGACATGGGTCC-ATGGGGCCCCAGTGGAAGGCAAACCCCCAGCCATT  
CGTCTGCTCAATNGAAGACCCCACCAAACAGACCAAGTTCAAGGGCATCAA  
GACCTACATTTCTTACCGGGTACRCCSAGCCACACAGGGCGTCTGTGT  
ACMGACGGTACAARCACTTYGACTGGCTSTACAACCGGTTACTGCACAAG  
TTCACCGTSATCTCTGTGCCACCTGCCGAGAAGCAGGCCACGGGGCG  
ATTTGAGGAAGACTTCATCGAGAAGCGCAAGAGACGACTGGTCCGTGGA  
TGAACCACATGACCAGTCACCCGGTSCTCTCTCAGTATGARGGCTTGGAG  
CACTTCTGATGTGCGCCGACGACAAACAGTGGAACTGGGAAAGAGRCG  
AGCGGAGAAGGACGAGATGGTGGCGGCCATTTTCATGCTGACCTTCCAGA  
ATCCCAACGAGCACCAGGACCTTCAGGATGTAGAGGAACGGGTGGACACC  
TTCAAGTCCTTCGCCAAAAAATGGACGACAGTGTGATGCAGCTCACGCA  
CGTGGCCTCGGAGCTGGTGCCAAACATCTGGGAGGGTTCAGGAAGGAGT  
TCCAGAGGCTKGGRAATGCCTTCCAGTCCATCAGCCAGGCTTTCACGCTG  
GACCTCCCCACAGCTCAGACACCTCCACCAACGCCCTTCTCCCA-----  
-----  
-----ACGTGATGATCTCCATCCTGCTGGTCAAAGACAAGAGCCTG  
CACCGGGCACCCTACTATTTCCCTGCTGGACCTGTGCGCCTCCGACATCCT  
GCGCTCCGCCATCTGCTTTCCCTTCGCTTCTACTTCGGTCAAGAATGGGT  
CGGCCTGGACGTACGGCAGCTGACTTGCAAGGTGATCGCCTTCCTGGGT  
GTCCTCTCCTGTTTCCACACGGCGTTCATGCTGTTTTCGCTCAGCGTCAC  
CCGCTACCTGGCCATCGCTCATCACCGTCTTACACCAAGAGGCTGACCT  
TCTGGACCTGCCTCGCCGTACCTGCATGGTGTGGACGTTGTCCGGTGGCT  
ATGGCGTTCCTCCAGTGTAGATGTAGGGACGTACTCTTTTATCCGGGA  
GGAGGACCAGTGCACATTCAGCACCGCTCCTTCAGGGCAAACGATTCGC  
TGGGCTTCATGCTCCTGCTGGCGCTCATCCTCCTGGCCACACAGCTGGTT  
TACCTCAAGCTCATCTTTTCGTCCACGACCGCCGAAAGATGAAGCCTGT  
CCAGTTCGTGCCTGCCGTAGCCAGAACTGGACCTTCCACGGGCGGGGG  
CCAGCGGGCAGGCGGCGGCAACTGGCTGGCTGGATTTGGCCGAGGCCCC  
ACCCCGCCTACTTTGCTGGGCATCCGGCAGAACAGCAACGCAGCAGGCCG  
CAGGCGTCTACTGGTGTTAGATGAGTTCAAACGGAGAAGAGGATTAGTA  
GGATGTTCTACATCATGACGTTTTCTTCCTGGCTCTGTGGGGGCCCTAT  
CTGGTTGCCTGCTACTGGCGGGTGTGTGCAAGGG-CCCCGTGGTCCCTGG  
GGGCTACCTGACGGCAGCCGTGTGGATGAGCTTTGCC-----  
-----GCCAAATCCCGCTTCCAC  
CCTGGCACCGGGACCGGTCTGGCACGGACC---GCAGCGTCCCACTTAG  
CAACAGCTTGCTATCCCCGCAACAAGCCGAAGAGACCGCAGCAG---CCT  
CCCCGCAGCGATGGTGTGTCACCC---CTGCCAAACAATCGACTGGACTTT  
GCCGCTCGGCATACGATGCCGCTGCCGCGGCTGATTTTGCCGGTAAACGC

GGCCACCCTGCTGTCTTACGCAGCTGCTGGAGTCAAGGCGC-----TTC  
CACTGCCCCTGCGGGGTGTTTACAGGTAGACCTCTGGGTTATTACGCCGAC  
CCCTCGG---GCTGG---GGCACGCGCACTCCACCCAGTATTGT-----  
----AGTAAATCCAGCTCAGTTTTGTCCTGTTGGCCAACAAATCCACTG  
GGAGCAGGACTGGAA---CTTCAAATTACCTGG-----TGGATGA-  
--GGGG---GACAC---GATGACAACGGAAAGGTCTCCA---CT---AAG  
TGCGTCCGAGGAT---GCCAAACCTAAAGACCT-----GTCGGA---AT  
CCAGCTGGATAGAG---ACACCTTCCCTCATTAAATCGATCGATTCAAGT  
GATTCTGGAATTTTTG---AGCAGGCGAAACGGAGGCGAATATCACCTTC  
TGCCACGCCG-----GTTTCTGAAACTGCATCTCCATTGAAAAGCG  
AA-----ACAGGCGAAGTCACCGATAGAGAAGTTGGGTTGGGGTTA  
AATCCCTTTGCTGACGGGATGGGCGTTTTCAAATCAACCAMGGTACTCA  
CGAGCTTGCTTCTGG---ACAGACCGTTTTCTCATCACAGGCT---CCCA  
GSTAC---GCAGCAGCCGTTTTGGGG---CATCACCA-----CCACCCT  
GCTCATGTCAGCTCC---TACTCAACCGCAGCGTTCAACTCCACCCGGGA  
CTTTCTGTTCCGAAATCGGGGATTCGGAGACGCCGCAAG-----  
-TGCGCAACACAGTCTTTTTTGCCTCAGC---GGCAGGAACTTT---C---  
---GCAGGGCCACATGGACACTCAGATGCCACCGGACACCTTCTTTTCCC  
GGGACTGCACGAG---CAGGCAGCCACACATGGGTCTCCAAACGTTGTAA  
ATAGTCAGATGCGCCTGGGGTTTACCGGGACATGTACGGCAGAGCAGAA  
CAGTATGGACAGGTGACGAGTCCCAGGT---CTGAGCACTATGCTTCGAC  
ACAGTTGCACGGGTATGGTGCCATGAACATGAACATGGCTGCA---CACC  
ACGGGGCTGGGGCCTTTTTTTCGATACATGCGGCAACCCATTAAACAAGAG  
CTTATCTGCAAGTGGATTGAACCGGACCAGCTGTCGAATCCCAAAAAGTC  
TTGTAATAAAACTTTTACGACCATGCACGAGCTCGTGACTCACCTCACGG  
TAGAACATGTTGGGGGACCTGAACAATCAAATCACATTTGCTTTTGGGAA  
GAATGTCCCCGGGAAGGCAAGCCATTAAAGCAAATACAAACTCGTTAA  
CCATATCAGAGTGCACACGGGCGAAAAGCCGTTCCCATGCCATT-----

>*Fistularia petimba*

AGCCTTCTCATCCGCGCAGAGCTCAGCCAGCCCGGTGCACTACTGGGCGA  
CGACCAGATCTATAATGTAATCGTTACGGCCACGCCTTTGTAATAATTT  
TCTTTATAGTAATAACCAATCATGATCGGAGGCTTCGAAACTGATTAATT  
CCTCTTATGATCGGTGCCCCAGACATAGCCTTTCCCGGATAAAATAACAT  
AAGCTTCTGACTTCTCCCCATCTTTCTTACTTCTATTAGCATCCTCTG  
GAGTTGAAGCTGGGGCCGGAACAGGGTGAACAGTCTACCCTCCTCTTGCA  
GGAAATCTGGCCCACGCTGGAGCCTCTGTAGACCTAACGATCTTCTCCCT  
GCACCTAGCAGGCATCTCATCAATCCTAGGAGCAATTAACCTCATCACAA  
CCATTATCAACATAAAACCTCCAGCCATCTCACAGTACCAGACACCTCTT  
TTCGTCTGAGCTGTCTCATTACCGCTGTGCTTCTCCTACTTTCACTGCC  
TGTTCTTGCTGCCGGCATTACCATGCTCTAACGGACCGAAATCTAAACA  
CCACATTTTTTCGACCCAGCGGGAGGAGCGACCCCATCCTGTATCAACAC  
CTA-----

-----NNNNNNNGAGAAACCTTACCCATCCAACCTGCTTGGCATGCTGT  
TGCTTCTGATGCCACCAGTGCACCAAGCTGTCAGAGCTTCTCTGGGGC  
ATGTGCCTCAGCAACTTCCCTGCTATTTGCAAGACGGAGGACTTCCCTCA  
ACTGCCAAAAGATATGGTGGTTCAGCTTTTGTACACGAGGAGCTAGAAA  
CAGAGGATGAGCGTCTAGTTTATGAAGCTGCCCTGAACTGGATCAACTAT  
GACCTGGAAGACGGCACTGCCACCTTCCGGAGCTCCTCAGAACCGTCCG  
TTTAGCTCTTTTGGCAGCGATCTTCTCATGGAGAATGTCTCAACAGAAG



TCGGCTTCTACATTTACGAGCCCATCGAGTACTGGAACGCCACGGTGCAG  
GAGCACCTGAAGACTCTGAGTCACGGCTTCAACAAGATCTCCTGGATGGA  
CAACTTTTTTCCACTACCTGAAGGTGGTCAACGTGAGCGCGTCCACCAAGA  
GCGACTTCATCTCCATCCTCAAGGGCTCCTTCTGCGCAGCCCCGAGTAC  
CAGCACTTACCGAGGACATCATCTTACCAAGA---ACCGCGACACCG-  
-----ACGAGTACGACATCATCGCCTCGCGCATGTACCTGGTGGCGCGGA  
CCACGGAGAAGAAGCGCGAGGAGGTGGTGGAGCTTCTGGAGAAGCTGCGC  
CCGCTGATGCTGATCAACAGCATCAAGTTCATCGCCTTCAATCCGACGTT  
CGTGTTTCATGGACCGCTACAGCTCCTCGGTCATCTCGCCCATCCTGACCT  
CGGGCTTCAGCGTGCTCACCATCCTCATCCTCACTTCTTCTGCTCATC  
AACCCCTTGAAAACCTTCTGNNNNNNNNNNNNNNNNNNNNNNNNNNNNNNNN  
NNNNNNNNNNNNNNNNNNNNNNNNNNNNNNNNNNNNNNNNNNNNNNNNNNNN  
NNNNNNNNNNNNNNNNNNNNNNNNNNNNNNNNNNNNNNNNNNNNNNNNNNNN  
NNNNNNNNNNNNNNNNNNNNNNNNNNNNNNNNNNNNNNNNNNNNNGAAAAGGC  
TGGAGGACAGTGCCTGCACCTC  
AGGCTTTAGGGTTATGATCAAAGAATGTTGTGATGGCATGGGAGACGTGA  
GTGAGAAGCACGGAGGAGGTCCAGCTGTTCTGAGAAGGCAGTACGCTTC  
TCTTTCACTGTTATGTCTATTTCTGTTATGGTTGATG-----AG-----  
-----GAGTACGTCACAATCTTCACTGAGC  
CCAAGCCTAACTCAGAAGTGTCTTGTAGGCCCTTTGCCTGATGTTTGTG  
GATGAATCAGACCATGAGACACTGACAGCTATCCTGGGGCCTATAGCTGC  
AGAGCGTAACGCAATGAAAGACAGCAGACTCATCCTATCCATTGGTGGGT  
TGCCTCGCTTCTTCCGCTTCATCTTCAGAGGTACAGGGTATGACGAGAAG  
ATGGTTCCGGAAATGGAGGGCCTGGAAGCATCTGGGTCCACCTATGTCTG  
TACATTGTGTGACTCCAGTCGAGCAGAGGCCTCTCAAATATGGTACTGC  
ACTCCATCACACGGAGCCATGATGAGAAGTTAGAGCGTTATGAAATATGG  
CGAACCAACCCATTCTCTGAGACTGTGGACAAGCTGCGAGACAGAGTCAA  
AGGAGTATGTGCCAAGCCCTTCATGGAGACCCAGACAACACTTGATGCAT  
TACACTGTGACATTGGCAATGCCACAGAGTTCTACAAAATTTTCCAGGAT  
GAAATTGCGCAGGTATACAGAAAGGT---CAGT---CCTAGCCGGGAGGA  
GAGGCGCAGTTGGAGGGCGGCTCTGGATAAGGAGCTGAGGAGAAAGATGA  
AGCTGATAACCAGTAATGAGGATGAATGGTAATTATGCACGAAAGCTAATG  
TCCATGGAGACCATAGAGGTGGTGTGTAAGTGGTACCCTCTGAAGAGAG  
AAGGGAGGCCCTCAGGGAGCTCATGAGGCTATACTTCAGATGAAGCCCG  
TGTGGCGAGCCACCTGTCCAGCACAGGAATGCCCTGACCAGCTGTGCCGC  
TACAGCTTTAATTCCAGCGCTTGTGCTGACCTCCTCTCCTCTACTTTCAA  
ATATAGGTACAATGGAAAGATAACCAATTATCTGCACAAGACCCTGGCCC  
ATGTCCAGAANNNNNNNNNNNNNNNNNNNNNNNNNNNNNNNNNNNNNNNNNN  
NNNTCGTACTCCATCGAGATGGCGCCGCCGGGGCCCCGGTGG  
AAGGAGAGCCCGCAGCCCTTCTCTGTTCCATCGAAGACCCACCAAGCA  
GACCAAGTTC AAGGGGATCAAGACGTACATCTCGTACCGGGTCACGCCGA  
GCCACACGGGTGCGCCCGTGTACAGGGCGCTACAAACTTCGACTGGCTG  
TACAACCGCCTGTGCACAAGTTCATGTGATCTCCGTGCCTCACCTGCC  
CGAGAAGCAGGCCACGGGGCGCTTCGAGGAGGACTTCATCGAGAAGCGCA  
AGCGGCGACTGATCCTGTGGATGAACCACATGACCAGCCACCCGGTGCTG  
TCCCAGTACGAAGGCTTCGAGCACTTCTGATGTGCGGCGACGACAAGCA  
GTGGAAGCTGGGCAAGAGGCGAGCCGAGAAGGACGAGATGGTCCGGCGCCC  
ACTTCATGCTGACCCCTCAGATACCCAACGAGCACCAGGACCTCCAGGAC  
GTGGAGGAGCGGGTGGACTCCTTCAAGGCGTTTGCCAAGAAAATGGACGA  
CAGCGTCATGCAGCTCACCCACGTGGCGTCCGAGCTGGTCCGGAAGCACC  
TCGGCGGCTTCAGGAAGGAGTTCAGCGGCTRGGGAACGCGTTCCAGTCC  
ATCAGCCAGTCTTCATGCTGGACCCCGCACAGCTCGGAGGCCCTCAA  
CAACGCCATCTCCACNNNNNNNNNNNNNNNNNNNNNNNNNNNNNNNNNTCATTGGCGTCCGT



AGCCTACTTATCCGAGCAGAACTTAACCAACCAGGCTCTCTTCTAGGAGA  
CGACCAGATTTACAATGTTATCGTGACAGCTCACGCGTTTGTAATAATTT  
TCTTTATAGTAATACCTATCATAATTGGAGGATTCGGCAACTGACTGATC  
CCTCTAATAATTGGGGCCCCAGATATGGCCTTCCCCGAATAAATAATAT  
AAGCTTCTGACTACTCCCCCTTCTTCTTCTCCTCCTTGCCTCATCTG  
GCGTAGAAGCCGGGGCTGGTACTGGATGAACTGTCTACCCACCGCTCGCT  
GGCAACCTTGCCACGCAGGGGCTCTGTTGACTTAACAATCTTCTCTCT  
ACACCTAGCAGGAATTTCTTCAATTCCTGGAGCCATCAATTTCACTACTA  
CCATTATTAACATAAAAACCCCCAGCTATAACCCAATATCAGACTCCACTT  
TTCGTGTGATCTGTCTAATCACCGCGTCTTGCTCCTCCTATCCCTCCC  
TGTTCTTGCCGCCGAATTACAATGCTACTTACAGACCGAACTTAAATA  
CAACTTCTTTGACCCGGCAGGAGGAGACCCCTATTCTTTACCAACAC  
CTG-----  
-----  
-----  
-----

-----TTCTAGAGAGAAACCTTACCCATCTAACTGCCTTGG  
CATGCTGTTGCTGTCTGACGCCACCAGTGCACCAAGCTGTCCGAGCTCT  
CCTGGGGCATGTGCCCTCGGCAACTTTCCCGCTATTTGCAAGACAGAGGAC  
TTCTCCAACCTGCCCAAAGATATGGTGGTGCAGCTTTTGTACATGAGGA  
GCTAGAGACAGAAGATGAGAGACTGGTTTATGAAGCTGCCCTCAATTGGA  
TCAACTATGACTTGAAAAGAGGCACCTGCCACCTTCCAGAGCTCCTGAGA  
ACGGTCCGTCTCGCCCTGCTGCCTGCCATCTTTCTCATGGAGAACGTATC  
TACAGAAGAGCTGATCAATGCCAGGCCAAGAGCAAGGAGCTGGTGGATG  
AAGCTATCCGCTGTAAGCTGAAGATCCTGCAGAATGATGGCGTCGTTAAC  
AGCCCATGTGCCCGTCCGAGAAAACCCAGCCATGCCCTCTTTCTCCTGGG  
AGGGCAGACTTTCATGTGTGACAAGTTGTACCTGGTGGACCAGAAAAGCCA  
AAGAGATCATCCCCAAGGCTGACATTTCCAGCCCCAGGAAGGAGTTCAGC  
GCCTGCGCCATCGGATGTAAGGTGTACATCACTGGTGGGA--GAGGCTC-  
AGAGAATGGTGTGTCCAAAGATGTTTGGGTCTATGATACGGTCCACGAGG  
AATGGTCAAAGGCGGCACCCATGCTCATTGCCAGGTTTCGGCCATGGCTCT  
GCGGAGCTGAAACACTGCCTCTACGTGGTGGGAGGTCACACAGCTGCAAC  
TGGCTGCCTCCCGCTTCCCCGCTCGGATGAATAACATTGTTGTGTTAGT  
CGCTCAACAACGAGGCTGATATTGAATGAAGCAGAGTTAATCATGGCACT  
WGCCCAGGAGTTCAGATGAGAGTGGTCACGGTGTCTCTGGAGGAACAGT  
CTTTMCCAGTATAGTCCAGGTGATCAGCAGTGCTACCATGCTGGTCAGT  
ATGCATGGAGCTCAGCTCATCACCTCACTCTTCCCTCCAAGAGGAGCTCT  
CGTGGTGGAGCTGTTCCCTTTTCGCTGTAACCCAGAGCAGTACACCCCGT  
ATAAAACCCTTGCCCTCCCTGCCAGGCATGGACCTTCACTACGTTTCTTGG  
AGGAACACTAAGGAGGAGAATAACCATCACCCATCCAGACAGACCCCTGGGA  
ACAAGGGGGCATCGCTCACTTGGACAAAAGAGGAGCAAGAGCGAATACTGT  
TGAGCAAAGATGTCCCAGACACCTGTGCTGCCGCAACCCGGAGTGGCTC  
TTCCGGATCTACCAGGACACTTTGGTGGATATCCCCTCCTTCTTGGAAAGT  
CCTCAA---AGAGGGCATGAAG---ACCAAGCCCAGCTTGARGAA---GT  
CAAAGCCGGCCAACACAGTCCACCCGGGCGGGTCAGAGAACCCAGTGT  
CAAACCTCAGTACAAACCACTAATGAGGCTAAACTCACAGTCTCCTGGCA  
GATCCCGTGGAACTCTGAAATACCTTAAGGTGAGAGAAGTGAATAACGAGG  
TGTGGATCCAGAAAAAGATAACCAGCAAGGGGACCCCTGGAGGATCAAATC  
ATCCAGGCGAACCCGGCCTTGGAGGCTTTCGGCAATGCCAAAACATTGAG  
AAACGACAACCTCGTCTCGTTTTGGAAAATTCATCCGAATTCACTTTGGTA  
CGAGCGGCAAGCTGTCTGCTGCTGACATCGAGACGTACCTGCTGGAGAAG  
TCACGTGTCACCTTTCAGCTCAAGGCTGAGAGGAATTATCACATCTTCTA  
TCAGATCCTGTGCAATCAGAAGCCAGAGCTGCTGGACATGCTGCTGATCA



CCAACAACCCGTATGACTACTCCTACATCTCCCAAGGAGAAGTGACGGTC  
GCCTCCATCAACGACTCAGAGGAGCTGATGGCCACGGACAGCGCATTCGA  
TGTGCTTGGCTTCACTCCAGACGAGAAGATGGGCGTCTACAACTGACGG  
GCGCCATCATGCACTATGGCAACATGAAGTTCAAAACAGAAGCAGCGTGAG  
GAGCAGGCTGAGCCGGATGGGACGGAGGCTGCTGATAAATCTGCTTACCT  
AATGGGGCTGAACTCTGCTGACCTCATCAAAGGGCTGTGCCACCCCAGAG  
TCAAGGTAGGAAATGAATACGTAACCAAAGGCCAAAGTGTGGACCAGGTC  
TACTACCCCAACAAGGAGGCCTTCAAGTGTGAGGAGTGTGGGAAGCACTA  
CAACACCAAGCTGGGATATAAGCGCCATATGGCCATGCACTCTGCCACGG  
CAGGGGATCTCACCTGTAAAGTGTGCATGCAGACCTATGAGAGCACGCCT  
GTGCTCTTGGAGCACCTCAAGAGCCACTCCGGGAAGTCTTCAGGTGGCAC  
CAAGGAGAAAAAGCACCCGTGTGACCCTGTGACCGTCGTTTCTACACGC  
GGAAGGATGTGAGACGGCACATGGTGGTCCACACGGGCCGAAAGGACTTC  
CTGTGCCAGTACTGCGCCCAACGCTTGGCAGAAAAGGACCACCTGACACG  
CCACGTGAAGAAGAGCCACTCACAGGAGCTGCTGAAAATCAAGACGGAGC  
CTCCTGATATGTTAGGTCTTTTAGCTTCCGGGTACCACCTTGCTCTGTG  
AAGGAGGAGCTCAGCCCCATGATGTGCGGCATGGGTCCCAACAAAGACCC  
CATGATGGGCAAGCCATTCCCCAGTGGCGCCCTTTTCAGATGGGCATGT  
ACAACCCCCACCAT-----CTCCAGGCAATGTCCAATTCTGGGGTGGGT  
CACCCA-----CACCCGTCCCTGATGCCAGTTCCTTGTCTGCAGCTAT  
GGGCATGGGCTGTACATGGAATATCTCATCTACGCCTCCTTCTCATTCA  
TGGGATGTTTACAAATCAGTGATGGATCAAATATCGTGAACCTGCTGGCT  
AGTAACTCTCCAAGTGTTCGTATGCTCTGACCCAGCAAAAATACTTCAG  
TAACTACAGTCTGTGATTGGGTTTTATATTTATGAGCCCATAGAGTACT  
GGAACTCCACAGTGCAGGAGCACCTGAAGACTCTGAGTCATGGCTTCAAC  
AAGATCTCCTGGATGGACAACCTTTTTCCACTACCTGCGGGTGGTGAATGT  
CAGTGCCTCAACCAAGAGCGACTTCATCACCATCCTCAAGGGCTCCTTCC  
TGCGCAGCCCGGAGTACCAGCACTTCACTGAGGACATCATATTCTCCAAG  
A---ACCCTGAGACTG-----ATGAGTATGACATTATCGCCTCACGGAT  
GTACTTGGTGGCACGGACGACAGAGAAGAAGCGGAGGAGGTGGTGGAGC  
TTCTGAAAAGCTTCGTCCGTTGATGCTGATCAACAGCATCAAATTCATT  
GCCTTCAATCCTACGTTTCGTGTTTATGGACCGATACAGCTCCTCCGTCAT  
CTCGCCATCCTGACCTCAGGATTCAGCGTACTCACAATCCTCATCCTCA  
CTTTCTCCTGGTTCATCAACCCCTTGGGAACTTCTGGCTCATCCTCACT  
GTAACGTCCTGGAGCTGGGTGTCTTAGGTTTGTGAGGGCTTTCACAGTT  
TGAATGGCAGCCCGCTCTCAAGAAATGTGTCTACATCTTGCAATGTTGGCA  
TTATTAATGGGCTTCTGGATGGGCTTCCTCAGTGGATGACTCCCAGCT  
GACACTATCACTCGGCGGTTTCGCTATGATGTGGCACTGGTGTGAGCATT  
AAAAGATCTGGAGGAGGACATCATGGAGGGGCTGAGAGAGAGTGGGATGG  
AAGACAGCGCTTGCACCTCAGGCTCAGTGTGATGATCAAGGAATCTTGT  
GATGGCATGGGCGATGTCAGCGAGAAGCACGGTGGCGGACCAGTTGTTCC  
TGAGAAGGCTGTACGTTTCTCTTTCACRTRTATGTCTGTCTCTATCCTGG  
CAGCTGACAGGGAG-----GAAGAG  
GTTACCATCTTCACAGAGCCAAAGCCGAACCTCAGAATTGTCCTGTAAGCC  
CATTTGCCTGACATTTGTGGATGAGTCAGACCACGAGACGCTCACAGCCA  
TCCTGTGGCCTCTTGTTCAGAGCGTAATGCAATGAAAGAGAGCAGGCTC  
ATCCTATCCATTGGTGGACTGCTTCGCTCCTTCCGCTTTCCTTTCAGAGG  
CACGGGATACGATGAGAAGATGGTGCCTGAGATGGAGGGCCTCGAGGCCT  
CAGGGTCCACCTATATCTGCACCCCTTGTGACTCCGGTCCGGGCAGAAGCT  
TCTGAAAACATGGTGCTACACTCCATTACTCGCAGTCATGAAGAGAACCT  
AGAACGTTACGAAATATGGAGAACCAACCCCTTCTCTGAGTCTGCAGATG  
AGCTGCGAGACAGAGTCAAAGGGGCTCTGCCAAGCCCTTCATGGAGACT  
CACCCAACAATGGACGCATTACATTCGCACATAGGCAATGCCACTGAGTT

CTACAAAATCTTCCAGGATGAGATCGGGGAGGTGTACCAAAGGT---CA  
AC---CCCAGCCGGGAGGAGCGGCGCAGCTGGAGAGCAGCCCTAGATAAA  
CAGCTGAGGAAGAAGGTGAAGCTGAAACCAGTAATGAGGATGAACGGGAA  
CTTTGCCCGCCGGCTAATGACCATGGAGGCTGTGGAGGCAGTGTGTGAGC  
TGGTGCCCTCTGAGTTGAGGAGGGAGGCCCTGAGGGAGCTTATGAGGCTC  
TACCTACAGATGAARCCTGTGTGGCGCGCCACCTGCCAGCCAAGGAGTG  
CCCCGACCAGCTGTGCCGCTATAGCTTTAACTCCCAGCGCTTTGCTGACC  
TCCTCTCCTCTACCTTCAAATATAGGTACAATGGAAAGATACCCAATTAC  
CTGCACAAGACCCTGGCCCATGTGCCGAAATCATAGAGAGAGATGGATC  
CATAGGAGCCTGGGCCAGCGAGGGGAACGAGTCGGCAAACAAATCGTACA  
CCATCGAGATGGGTCCCTTAGGGCCCCGGTGGAAAGGAGAGCCACAGCCT  
TTCTGCTGCTCCATTGAAGACCCCCACTAAACAAACAAAGTTCAAAGGCAT  
CAAGACGTACATTTTCGTACCGTGTACGCCRAGCCACACTGGGCATCCTG  
TCTACAGGCGCTACAAACACTTTGACTGGCTGTACAACCGCTTACTGCAC  
AAGTTCACTGTGATCTCTGTGCCTCACCTGCCTGAGAAGCAGGCCACGGG  
GCGATTTCGAGGAAGACTTTATCGAGAAGCGCAAGAGGCGACTGATACTGT  
GGATGAACCACATGACCAGTCACCCAGTCCTCTCCAGTATGAAGGCTTC  
GAGCACTTTCTGATGTGTGCTGATGACAAGCAGTGGAACTGGGCAAGAG  
ACGGGCGGAGAAGGACGAGATGGTGGGTGCCCATTTTCATGCTGACCCTCC  
AGATCCCCAACGAGCACCAGGACCTTCAGGATGTAGAGGAGCGGGTCGAC  
TCCTTCAAGGCCTTCGCTAAGAAAATGGATGACAGCGTGATGCAGCTCAC  
GCATGTCGCCTCGGAGCTGGTGCCTAAGCACCTGGGTGGGTTTCAGGAAGG  
AGTTCCAGCGACTGGGAAATGCCTTTCAGTCTATCAGCCAGGCGTTCATG  
CTGGACCCTCCCCACTGCTCAGAGACCTTCAACAACGCCATCTCCCACNNNNNNNNNNNNNNNTC  
AAACTGACCTCTCTGGGTTTCATCATTTGGAGTCGGTGTGGTTGGAAACCT  
CCTGATCTCCATCCTGCTGGTCAAAGACAAGAGCCTGCACAGAGCGCCCT  
ACTACTTCCCTGCTGGACCTGTGCGCCTCTGATATCCTACGCTCCGCCATC  
TGCTTCCCTTTTGTCTTACCTCGGTCAAGAATGGATCTGCCTGGACCTA  
CGGCACGCTGACCTGCAAGGTGATCGCCTTTCTGGGTGTCTCTCCTGTT  
TCCACACGGCGTTTATGCTGTTCTGTGTGTCAGTGTACACGCTACCTGGCC  
ATCGCACATCACCGTTTCTACACCAAGAGGCTGACCTTCTGGACCTGTCT  
AGCTGTCAATTTGCATGGTGTGGACGTTATCAGTGGCTATGGCGTTCCCGC  
CGGTGCTAGACGTAGGGACGTACTTTTCATCCGGGAGGAGGACCAGTGC  
ACCTTCCAGCACCGTTCCCTCAGGGCSAATGATTCGYTGGGCTTCATGCT  
CCTGCTGGCGCTCATCCTCCTGGCCACACAGCTGGTTTACCTCAAGCTCA  
TCTTCTTCGTCCACGACCGTCCGAAAGATGAAGCCCCTCCAGTTCGTGCCT  
GCTGTGAGTCAGAACTGGACCTTCCACGGGCCAGGCGCCAGCGGGCAGGC  
GGCCGCAACTGGCTGGCTGGATTTGGTTCGAGGCCACCCCGCCTACTC  
TGCTGGGCATCCGGCAGAACAGCAACGCAGCGGGCCGCCGGCGTCTGCTG  
GTATTGGATGAGTTCAAACAGAGAAGAGGATTAGTAGGATGTTCTACAT  
CATGACGTTTTTCTCCTGGCGCTGTGGGGGCCCTACCTGGTCCGCTGCT  
ACTGGCGGGTGTGTTGCGAGGGGCCCTGTGGTCCCTGGAGGCTACCTGACA  
GCAGCCGTGTGGATGAGCTTTGCCAGGCTGGGGTCAACCCTTTCATCTG  
TATCTTCTCAAACAGGNNNGCCAAATCTCGCTTTCACCCTGGCATGGGGACTG  
GTCCTGGCACGGAGC---GCAGCGTCCCCTCGGCAACAGCTTGCTATCC  
CCGCAGCAAACCGAGGAGCCACTGTTGCCACCCCCCGCAGCGATGGTT  
TGTCACCC---CTGCCAACAACCGACTGGACTTTGCTGCCTCGGCATACG  
ACGCCGCT-----GATTTCCGCCGTAACCGGGCCACCTTGCTGTCC  
TACGCAGCGGCCGGAGTGAAGGCTC-----TTCCCCTGCCGACTGCAGG  
CTGCTCCAACCGGCCCTTGGCTATTACGCAGACCCGTCAG---GCTGG-  
--GGAGGACGCACGCCGCCGAGTACTGCGGCGTGAACAGCAAATCCAGC  
TCGGTCTTTTCTGCTGGCCACTAACTCTATCGGAGGCAGAGCGGGTA-  
--CC---AACTACCTGG-----CTGAGGA---GGGA---GACTC--

-CATCCCGACGGAGCGGTCACCG---AT---CGGCGGCTCGGAGGAG---  
ACCAAACCCAAAGACATGAC---ATCAGA---GTCGAACTGGATAGAG--  
-ACGCCGTCCTCGATTAAGTCCATCGACTCAAGCGATTCTGGTATCTTTG  
---AACAGGCCAAAAGGAGAAGGATCTCACCTTCTGCCACGCCA-----  
---GTTTCAGAGACAGTGTCCCCGCTAAAATCAGAGCATCACTCAACAGG  
GGAAGTCACAGAGAGAGAAGTGGCGTTGGGGATAAATCCCTTCGCAGATG  
GGATGGGCGCTTTCAAATAAAACCACAGCTCCCACGATATTGGCTCCGG-  
--ACAGACGGCGTTTTCTCCCAGGCG---CCCGGCTAC---GCAGCAGC  
CGCCCTGGGA---CACCACCA-----CCACCCGACCCACGTTGGCTCT-  
--TACTCCACGGCGGCTTTCAACTCCACCAGGGACTTTCTCTTCAGAAAT  
CGGGGATTTCGGGACGCCACCGG-----CGCGCAGCACAGTTT  
GTTTCGCCCTC-----CGGAAGTTT---C-----GCAGGCCACATG  
GACACTCAGATGCAGCGGGGCACCTGCTCTTTCCGGGGCTCCACGAG---  
CAAGCGGCGAGCCATGCGTCTTCCAACGTGGTCAACAGCCAGATGCGGCT  
GGGCTTCTCGGGGGACATGTACGGACGGGCCGACCAGTACGGCCACGTTA  
CAAGCCCAGCGGT---CCGACCACTACGCCTCGACCCAGCTGCACGGCTAC  
GGCCCCATGAACATGAATATGGCCGCA---CACCACGGAGCAGGGGCCTT  
CTTTTCGATACATGAGGCAGCCGATCAAGCAAGAGCTCATCTGCAAGTGGA  
TCGAGCCGGAGCAGCTGACAAATCCCAAAAAGTCGTGCAACAAAACTTTT  
AGCACGATGCACGAGCTGGTGACCCATCTGACGGTGGAGCATGTGGGGGG  
ACCGGAGCAGACCAACCACGTCTGCTTCTGGGAGGATTGCGCCCGAGAAG  
GAAAGCCATTCAAAGCCAAATACAAACTTGTAAATCATATCAGAGTACAC  
ACCGGAGAAAAGCCCTTTCCGTGTCCGTTCCCCGGCTGTGGCAAA

>Gadella jordani

AGTCTTCTTATCCGAGCCGAATTAAGCCAGCCCCGGTGCCCTTTTCGGTGA  
CGACCAAATTTATAACGTAATCGTCACGGCCCATGCTTTTCGTAATAATCT  
TTTTTATAGTTATAACCCATTATGATCGGTGGATTTGGAAACTGATTAATT  
CCACTAATGATTGGAGCCCCGACATAGCCTTCCCCCGTATAAATAATAT  
AAGCTTCTGACTCCTCCCCCCTCTTTCCTATTACTCTTAGCATCCTCAG  
GAGTAGAAGCAGGAGCAGGGACAGGATGAACTGTCTATCCCCATTAGCG  
GGTAACCTGGCCCACGCAGGTGCTTCCGTAGACTTGACCATCTTTTCCCT  
ACATTTAGCAGGAGTTTCCTCAATCTAGGGGCAATCAACTTTATTACAA  
CTATTATTAATATGAAACCACCCGAGTGTGCAATATCAAACACCTTTA  
TTCGTCTGATCCCTCCTAATTACAACGTTCCTTCTTTTAGCACTTCC  
TGTTTTAGCCGCGGAATTACAATACTTCTTACAGACCCGTAACCTTAACA  
CCTCTTTCTTCGACCCTGCTGGAGGAGGAGACCCCATCTTATACCAACAC  
TTATTCTGATTCTTTGGCCACCCCGAAGTCTACATTTTAATTCTTCCAGG  
CTTTGGAATGATCTCCCATATCGTAGCATATTATTCAGGTAAGGAGAGC  
CCTTCGGTACATGGGAATAGTATGAGCTATAATAGCAATTGGTTTCCTT  
GGCTTCATCGTTTGAGCCCACCATATGTTTACCGTTGGGATAGACGTTGA  
CACACGGGC---TTCTCGAGAGGAACCTTACCCGACCAACTGCCTTGG  
CATGCTGCTGCTGTCCGACGCCCACCAGTGCACCAAGCTTTCCGAGCTCT  
CTTGGAGCATGTGCCGAGCAACTTCCCTGCCATATGCAAGACAGAGGAT  
TTTCTCCAACCTGCCAAAGATATGGTTGTGCAACTTTTATCCCACGAGGA  
GCTGGAGACAGAAGAYGAGAACTTGTTTACGAGGCCGCACTCAACTGGG  
TCACCTATGACCTGCAAGGGAGGCACCCCACTTGCCCGAACTGCTGAAA  
ACAGTGGCTCTGGCTCTTCTCCCCGCCATCTTCTCATGGAAAATGTCTC  
CACGGAAGAGCTGATAAACACCCAGAGCAAGAGCAAGGAGCTGGTGGACG  
AGGCCATATGCTGCAAGCTGAGGATCCTGCAGAAAGACGGCGTGGTCAAC  
AGCCCGTGCGCCCGTCCGAGGAAGACCAGCCATGCGCTCTTTCTGCTGGG  
AGGGCAGACCTTCATGTGCGACAAGCTGTACCTGGTGGACCAGAAAGCCA  
AAGAGATCATCCCCAAGGCCGACATACCCAGCCCGCGGAAGGAGTTCAGC  
GCCTGTGCCATCGGCTGCAAGGTGTACATCACGGGCGGGC---GGGGCTC-







AAGCTTCTGACTTCTTCCTCCATCTTTCCTGCTCCTTTTAGCATCCTCTG  
GTGTAGAAGCTGGGGCTGGAACAGGCTGAACTGTCTATCCACCTTTAGCC  
GGAAACCTCGCTCATGCTGGGGCATCTGTTGATCTCACTATTTTTTCTCT  
TCATCTAGCAGGGATTTTCATCAATCTTGGGGCAATTAATTTTATTACCA  
CAATTATTAATATGAAACCTCCGGCAATTTACAGTACCAAACACCCCTA  
TTTGTGTGAGCAGTACTAATTACAGCTGTGCTTCTACTATTATCTCTCCC  
CGTCTTAGCAGCTGGTATCACAATACTTCTAACTGACCGTAATCTTAATA  
CTTCTTTCTTTGACCCTGCTGGAGGAGGTGATCCCATTTTATAACCAACAC  
TTA-----  
-----  
-----  
-----

-----TTCTGGAGAGGAACCTCCACCCGACCAACTGCCTGGG  
CATGCTGCTGCTTTCCGACGCCACCAGTGCATCAAGCTCTCGGAGCTGT  
CCTGGAGCATGTGCTGAGCAACTTCCCGCCATATGCAAGACGGAGGAG  
TTTCTCCAACCTGCCCAAAGACATGTTTGTGCAGCTTTTGTCCCACGAGGA  
GCTGGAGACGGAGGACGAGAAACTTGTTTACGAGGCCGCGCTTAACTGGG  
TCACCTACGACCTGCAAGGAAGGCACCCCCACTTGCCGGAGCTTCTGAAA  
ACGGTGCCTGCTGGCCCTTCTCCCCGCGTCTTCTCATGGAGAACGTCTC  
CACCGAGCCACTGATAAACAGCCAGACCAAGAGCAAGGAGCTGGTGGACG  
AGGCCATCTGCTGCAAGCTGAAGATCCTGCAGAACGACGGCGTGGTCAAC  
AGCCCGTGCGCCCGTCCCAGGAAGACCAGCCACGCGCTCTTCTGCTGGG  
AGCCAGACCTTCATGTGCGACAAGCTGTACCTGGTGGACCAGAAAGCCA  
AAGAGATCATCCCCAAGGCCGACATCCCGAGCCCCAGGAAGGAGTTCAGC  
GCCTGCGCCATCGCTGCAAGGTGTACATCACGGGCGGGC--GGGCTC-  
GGAGAACGGCGTGTCCAAGACGTGTGGGTGTACGACACGGTGCAGGAGG  
AGTGGTCCAAGGCGGCGCCCATGCTGATCGCCCGCTTCGGCCACGCTCG  
GCGGAGCTGAAGCACTGCCTGTACGTGGTGGGCGGGCACACGGCCGCCAC  
GGGCTGCTTCCCGCCCTCTCCGTCCGGAGGATTACATCGTGGTTTTCTCC  
CGCTCCACCACGAGGTTGATCCTGAATGAGGCGGAGTTGATCATGGCACT  
AGCCCAGGAGTTTCAGATGAGGGTCTTGACGGTGTGCTGGAGGAGCAGT  
CGTTTGCCAGCATAAGTGCAGGTGATCAGCGGGGCGTCCATGCTGTTGAGC  
ATGCACGGCGCTCAGCTCGTACGGCACTGTTTCTACCCCGAGGGGCCGC  
CGTGGTGGAGCTGTTCCCTATGCGGTGAACCCCTGAGCAGTACACCCCGT  
ATAAGACCCTGGCCTCCCTGCCGGGCATGGACCTGCAGTACGTCTCCTGG  
AGGAACCTCATGGAGGAGAACACGGTCAACCATCCGGAACGGCCCTGGGA  
CCAAGGGGGGATCGTGCACCTGGAGAAGGAGGAGCAGGAGCGCATAACAGG  
TCAGCAAGGACGTCCCAGGCACCTGTGCTGTGCGGAACCCAGAGTGGCTT  
TATAGGATCTACCAGGACACTTTGGTAGACATCCCTTCACTCCTAGAAGT  
GCTGAA---GGAGGGCCTCAA---ACCAGGCCAGCGTGAAAA---GA  
ACAAGGCGGCCAGCACCGTTCAACCAGGGCGAGTCAGAGAACCCCAATGC  
CAGACCTCTGTCCAGGCCACCAACGAGGCCAAACTCACAGTGTCTGCGCA  
GATCCCGTGAACCTGAAGTTCTTGAAGGTGCGCGAGGTGAAGTATGAGG  
TGTGGATACAGAAGAAGGATGCCAACAAAGGGACTCTGGAGGATCAAATC  
ATCCAGGCCAACCTGCGCTAGAGGCCCTTCGGTAATGCCAAAACCTGAG  
GAATGACAACCTCTCGTTTTGGAAAGTTCATCCGGATTCACTTCGGGA  
ACAGCGGCAAGCTTAGCTCTGCAGACATCGAGACCTACCTGCTTGAAGG  
TCCAGAGTCACTTTCCAGCTGAAGTCTGAGAGGAACTATCACATATTCTT  
CCAGATCTTGTCCAATCAGAAGCCGGAGCTGTTGGACATGCTGTTAATTA  
CCAACAACCCCTACGATTACTCCTACATCTCCCAAGGAGAGGTAACCGTC  
GCCTCCATCAACGACTCTGAGGAGCTCATAGGCACTGATAGTGCCTTTGA  
TGCTCTCGGCTTACCCCTGGAAGAAAAGATGGGGGTGTACAAGCTGACTG  
GTGCCATCATGCACTATGGCAACATGAGGTTCAAGCAGAAGCAGCGCGAG











-----  
-----  
-----GGCTACCACGACTTCGAGTGGCA  
GCCGGCCCTGAGGAACGKTKCCCCGACTGCCACGTGGGCATCGTCGACG  
GCCTCTCGGGCTGGGCGGCCTCGGTGGACGACTCCCCGGCGGACACCATC  
ACCCGCCGCTTCCGCTACGACGTGGCCCTGGCGTCCGCCCTGAAGGACCT  
GGAGGAGGACATCCTGGCGGGCCTGAGGGAGCGCGGCCTGGAGGACGGCG  
CCGCCGCCACCCACTTCAGCGTCATGGTCAAGGAGTCCTGCGACGGCATG  
GGCGACGTGAGCGAGAAGCACGGCGGGCCGGCCGTCCCCGAGAAGGC  
GGTGCCTTCTCCTTCACCGTCATGTCCGTCTCCGTCCAGGCGGAGGGGC  
GGGAG-----GAGGCCGTGACGGTG  
TTCAGGGAGGCCAAGCCCAACTCTGAGCTSTCCTGCAAGCCCCTGAGYCT  
GATGTTTCGTGGACGAGTCAGACCACGAGACGCTCACGGCCATCCTGGGCC  
CGGTGGTGGGCGAGCGGGACGCCATGAAGCGGAGCCGGCTCCTS YTGACC  
CTGGGGGGCCTCCAGCGGTCTTCCGCTTTCACTTCGGGGCAGCGGCTA  
CGAYGAGAAGATGGTGC GCGAGATGGAGGGGCTGGAGGCCTCGGGCTCCA  
CCTACATCTGCACCTGTGCGACTCCACGCGGGCGGAGGCCTCGTCCAAC  
ATGGTGCTCCACTCCATCACCCGACGCCACGAGGAGAACCTGGAGCGCTA  
CGAGGTGTGGAGGACCAACCCGTACGCCGAGTCGGCCGACGAGCTGCGAG  
ACCGGTGAAGGGGGTCTCCGCCAAACCCTTCTGGAGACCCAGCCCACC  
CTGGACGCGCTGCACTGCGACATCGGCAACGCCACAGAGTTCTACAAGAT  
GTTCCAGGACGAGATCGGGGAAGTGTTCGGGAAGCC---CAAC---CCCA  
GTCGGGAGGAGAGGCGCAGCTGGCGGGCGGCCCTGGACAAACARCTCAGG  
AAGAAGCTGAAGCTGAAACCGGTYATGCGCATGAACGGGAACTACGCCCG  
CCGCTGATGACCCAGGAGGCGGTGGAGGTGGTGTGTGAGCTGGTCCCCT  
CGGAGGAGAGGCGGCTGGCCCTCCAGGAGCTCATGGCCTGTACATCCAG  
ATGAAGCCGGTGTGGCGGGCCTCCTGCCAGCCAAGGAGTGCCCGGACCA  
GCTGTGTGCTACAGCTTCAACTCGCAGCGCTTCGCCGAGCTCCTCTCCA  
CCACSTTYAAGTACAGATACGACGGCAAGATCACCAACTACCTCCACAAA  
ACGCTGGCCCATGTGCCTGAGATCATAGAGAGGGACGGGTCCATTGGAGC  
GTGGGCCAGTGAGGGGAATGAGTCGGGTAACAAG-----  
-----  
-----  
-----  
-----  
-----  
-----  
-----  
-----  
-----  
-----  
-----  
-----  
-----  
-----

-----NNNNNNNNNNNTTCTTAAACT  
GACCTCTTTGGGTTTTATCATTGGTGTGGCGTGGTCGGCAATTCCTAA  
TCTCCATCCTGCTGGTCAAAGACAAGAGCCTGCACCGCGCTCCCTACTAT  
TTCTGTTGGACCTGTGCGCTTCGGACATCCTGCGCTCAGCCATTTGCTT  
CCCCTTGTCTTACCTCAGTCAAGAATGGCTCGACGTGGACCTACGGCA  
CGTTACCTGCAAAGTGATTGCCTTCCTGGGCGTCTCTCCTGCTTCCAC  
ACGGCCTTCATGCTATTCTGTGTCAGTGTACACGCTACCTGGCCATCGC  
CCACCACCGCTTTTACACCAAGCGGCTGACTTTCTGGACGTGCTCGCGG  
TCATCTGCATGGTGTGGACCCTGTCTGTGGCAATGGCCTTTCCGCCAGTG

CTGGACGTGGGGACGTACTCGTTCATCCGCGAGGAGGACCAGTGCACGTT  
CCAGCATCGCTCGTTCGGTGCCAACGACTCGCTGGGTTTCATGCTCCTGC  
TGGCGCTCATCCTCCTGGCCACACAGCTGGTCTACCTCAAGCTCATCTTC  
TTTGTCCACGACCGGCGAAAGATGAAGCCAGTCCAGTTTGTACCAGCTGT  
CAGCCAGAACTGGACCTTTCACGGACCCGGCGCCAGCGGCCAGGCGGCAG  
CCAACTGGCTGGCTGGATTTGGCCGCGGCCGACGCCACCTACCTTGCTA  
AACATCCGTCAAAACAGCAACGCGGCAGGCCGCGAGGCGTCTGCTGGTGCT  
GGATGAGTTCAAAACAGAGAAGCGGATTAGCAGAAATGTTTTACATCATGA  
CCTTTTTCTTCTTGGCGCTGTGGGGACCCTATCTGGTAGCGTGCTACTGG  
CGGGTGTGTGCTCGTGGACCCGCCGTCCCTGGGGGCTACCTGACTGCTGC  
CGTGTGGATGAGCTTTGCCAGGCGGGCGTCAACCCCTTTATCTGCATCT  
TCTCCACAGGGAGGCCAAATCTCGATTTACCCCTGGCGTAGGGACCGGC  
CCTGGCACAGACC---GCAGCGTCCCACTTAGCAACAGCTTGCTATCTCC  
GCAACAAACCGAGGAGCCACAGTTG---CTTCCCACAGCGTTGGTTTG  
TCACC---CTGCCAATAACCGACTGGACTTTGCAGCCTCGGCATACGAT  
GCCGCTGCTGCWGCTGATTTTGCCGTAACGCAGCCACCTTGCTATCCTA  
CGCAGCGGCTGGAGTAAAGGCGC-----TACCGCTGCCACAGCAGGTT  
GTTCAAATAGGCCACTTGTTATTATGCCGATCCGTCAG---GGTGG---  
GGCGCCGGACACCTCCTCAATACTGT-----AGTAAATCCAGTTC  
AGTACTCTCTTGTGGCCAGTAATTCTGTTGGCGGGAGAACAGCTA---  
-----ACTACCTGG-----CGGATGA---TGTT---GACGC---C  
CTTCCCACAGAGAGATCACCC---AT---TGGAGGTTCCGAGGAG---AC  
AAAACCTAAAGACTT-----GTCAGA---ATCAAGCTGGATAGAG---A  
CGCCATCTTCAATAAAGTCAATTGATTCAAGTGATTCTGGAATCTTTG--  
-AGCAAGCCAAACGAAGAAGATTTACCGTCTGCCACTCCA-----  
-GTTTCAGAGACTGTGTCCCCGTTGAAATCTGAA-----  
-----  
-----GCTTTCAAAATCAACCATAGTTCACATGATTTGGGCTCTGG---  
GCAAACCTGCATTTTCGTCCCAAACA---CCAGGCTAC---GCTGCCGCTG  
CCCTTGA---CACCATCA-----CCACCCTACTCATGTGCTAGCTCT---  
TATTCGACTGCAGCTTTCATTTCTACACGGGACTTCTCTTCAGAAATCG  
GGGTTTGCAGATGCCACCAG-----TGCACAGCACAGCCTGT  
TTGCCTCCGC---AGCGGGAAGTTT---T-----GCAGGACCACATGGR  
CACTCTGATGCCGCGAGGACACCTGCTCTTCCCGGACTTCATGAG---CA  
AGCCGCAAGCCACGCATCCTCAAATGTTGTAAATAGTCAAATGCGATTGG  
GTTTTTCGGGGGACATGTATGGACGTGCCGATCAATATGGCCACGTTTCT  
AGCCCAAGGT---CCGATCATTACGCGTCAACCCAATTGCATGGTTATGG  
TCCTATGAACATGAATATGGCCGCA---CATCATGGTGCAGGGGGCCTTCT  
TCCGATACATGAGGCAGCCCATCAAACAAGAGCTAATCTGCAAGTGGATT  
GAACCGGAACAACTGGCAAACCCAAAAAAGTCATGCAACAAACTTTCAG  
CACAATGCATGAGCTCGTGACCCATCTAACAGTGGAACATGTGCGGGGGC  
CGGAGCAGTCAAACCACATTTGCTTCTGGGAAGAGTGTCCC-----  
-----

>Galaxiella nigrostriata

AGCTTATTAATTTCGAGCCGAGCTAAGCCAACCTGGGACCCTTTTAGGTGA  
CGACCAGATTTATAACGTAATTGTAACCGCACACGCCTTTGTAATAATCT  
TTTTTATGGTGATAACCGATTATAAATGGTGGTTTTGGTAACTGATTGGTG  
CCTCTGATAATTGGAGCTCCAGATATAGCATTTCACGCATGAATAATAT  
AAGCTTTTACTTCTTCCACCCTCTTTTCTTCTTATTAGCGTCTTCCG  
GAGTTGAAGCTGGGGCTGGCACAGGATGAACAGTTTACCCGCCCTTAGCG  
GGGAACCTAGCTCATGCTGGAGCCTCTGTAGACCTGACAATTTTTTCCCT  
TCACCTGGCAGGAATTTCTTCGATTTTAGGTGCAATTAACCTTTATTACTA

CAATTATTAATATAAAAACCCCCAGCAGTTTCACAATATCAAACCCCTTA  
TTTGTATGGTCCGTTTTAATTACAGCTGTACTCCTCCTTCTTTCTTTGCC  
AGTTCTTGCTGCAGGAATCACGATACTATTAACCGACCGAAATTTAAACA  
CAACTTTCTTCGACCCCGCGGGAGGAGGCGACCCCTATCTTATAACCAGCAC  
TTGTTTTGATTTTTTTGGACATCCC GAAGTCTATATTCCTTATTTTACCCGG  
CTTCGGAATAATTTACACATTGTCGCTTATTACTCAGGCAAAAAAGAGC  
CATCTGGTTACATAGGAATAGTTTGAGCTATGATGGCAATCGGCCTATTA  
GGCTTCATTGTTTGAGCCACCATATATTTACAGTCGGTATAGACGTAGA  
TACTCGAGNNNN-----

-----  
-----  
-----  
-----  
-----  
-----  
-----  
-----  
-----  
-----  
-----  
-----  
-----  
-----  
-----  
-----  
-----  
-----  
-----  
-----  
-----  
-----

NNNNNNNNNNNNNNNNNNNNNNNNNNNNNNNNNNNNNNNNNNNGGCTAATCCTCAACGAGGCCGAGGTGATC  
CTGGCCCTGGCC CAGGAGTTCAGATGAGGGTGGTGACGGTGTGCGCTGGA  
GGAGCAGTCCTTCTCCGCCATCGTTCAGGTCTCAGCAGGGCCTCCATGC  
TGGTGAGCATGCACGGAGCCAGCTCATCACCTCACTGTTCTCCCCCGG  
GGGGCCGTGGTGGTGGAGCTTCCCGTTCGCCGTCAACCCCGAGCAGTA  
CACGCCTTACAAGACCCTGGCTTCCCTGCCGGGCATGGACCTCCACTACG  
CCGCCTGGAGGAACCACCTGGAGGAGAACACGGTGACCCACCCGGACAGG  
CCCTGGGACCAGGGGGGCATCGCTCACCTGGAGAAGGAGGAGCGGGAGCG  
CATCGTGGCCAGCCGGGACGTTCCCCGGCACCTGTGCTGCCGGAACCCAG  
AGTGGCTCTTCCGGATCTACCAGGACACCAGGGTGGATGTGCCCTCCCTC  
CTGGAGCTCCTGCG---GGAGAACCCTGAAG---ACCCGACCAGCCTGAA  
GAA---GGCCAGGCCCGCCAGCACCGTCCACCCGGGCGGGTCCGCGAGG  
CCCGGTGCCAGACGTCCGTCCAGGCCGCAACGAGGCCAAGCTGACAGTT  
TGGTGGCAGATCCCGTGGAACCTGAAGTACCTGAAGGTCAGGGAGGTGAA  
GTNNNNNNNNNNNNNNNNNNAAGAAAGATCCAAGCAAGGGGACCC TGAGGATCAAATCATT CAGGCA  
AATCCAGCACTGGAAGCTTTTGGTAATGCCAAAAC TGTGAGAAACGACAA  
CTCATCCCGCTTTGGTAAATTCATCCGAATTC ACTTTGGA ACTACTGGAA  
AATTATCTTCTGCTGACATAGAGACTTACCTACTTGAAAAATCACGTGTT  
ACTTTTCAGTTAAAGTCAGAGAGGAACTATCACATCTTCTTTTCAGATCCT  
GTCCAATCAAAGCCAGAGCTGTTGGACATGCTTTTAATCACCAACAATC  
CCTATGACTATGCCTATATCTCCCAGGGAGAGGTTACAGTACAATCAATT  
AATGATGCAGAGGAGTTGATGGCCACAGACAGTGCCTTTGATGTGCTGGG  
CTTTACTCAAGAAGAAAAAATGGGCGTCTACAAATTGACCCGGTGCCATCA  
TGC ACTACGAAACATGAGGTTCAAGCAAAGCAGCGTGAAGAGCAGGCT  
GAGCCGGATGGTACAGAAGCTGCTGACAAATCCTCTTACCTGATGGGTCT  
AAATTC TGACAGCCTTATTAAGGGCTTTGT CATCCCAGAGTCAAAGTTG  
GCAATGAGTATGTTACCAAAGGTCAAGGTGTAGATCAAGTCTACTAT---



ACGCTGGCCCACGTGCCTGAGATCATAGAAAGAGACGGGTCCATCGGGG  
GTGGGCCAGCGAGGGGAACGAGTCCGGTAACAAG-----

-----GGCGAAGTCACAGAGAGAGAAGTAGCATTGGGGATAAACCG  
TTTGCAGACGGAATGGGCGCTTTCAAAATCAACCACAGTTCACATGATTT  
GGGCTCTGG---GCAAAGTGCATTTTCGTCCCAAACA---CCAGGCTAC-



--GCTGCGGCTGCCTTGGGA---CACCATCA-----CCACCCTACTCAT  
GTCAGTTCA---TATTCGACCGCAGCTTTCAATTCCACCCGGGACTTTCT  
CTTCAGAAATCGGGGTTTTGCAGATGCCACCAG-----TGCCC  
AGCACAGTCTGTTTGCCTCCGC---AGCGGGAAGTTT---T-----GCA  
GGACCACATGGACACTCTGATGCCGCAGGACACCTGCTCTTCCCAGGACT  
TCATGAG---CAAGCCGCGAGTCATGCGTCCTCAAATGTTGTGAACAGTC  
AAATGCGATTGGGCTTTTCTGGGGACATGTATGGACGTGCCGATCAATAT  
GGCCACGTTTCTAGCCCAAGGT---CCGACCATTATGCGTCGACCCAATT  
GCATGGTTATGGTCCATGAACATGAATATGGCCGCA---CATCACGGTG  
CGGGGGCCTTCTTCCGATACATGAGGCAGCCCATCAAACAAGAGCTAATC  
TGCAAGTGGATTGAACCGGAACAACCTGGCAAACCCCAAAAAGTCTTGCAA  
CAAACTTTTCAGCACAAATGCATGAGCTCGTGACCCATCTAACAGTGGAAC  
ATGTCGGGGGGCCTGAGCAGTCAAATCACATTTGCTTCTGGGAAGAATGT  
CCCCGAGAAGGAAAACCATTCAAAGCAAATACAACTTGTAATCATAT  
TAGAGTACACACCGGAGAA-----

-----

>*Gambusia affinis*

AGCCTACTGATCCGGGCCGAACCTCAGTCAGCCAGGCACACTTCTTGGAGA  
CGACCAGATCTACAATGTAATCGTTACAGCTCATGCTTTTTGTAATAATCT  
TTTTTATAGTTATAACCCATCATAATTGGAGGGTTTGGTAACTGACTAGTC  
CCCCTAATAATTGGTGCCCCAGACATAGCCTTTCACGAATAAAACAACAT  
AAGCTTTTGAATTAATCTCCCCCTCATTTCTCCTCCTTGCATCTTCTG  
GGGTTGAAGCAGGGGCAGGAACAGGCTGAACTGTCTATCCCCCTCTTGCA  
GGTAACCTAGCACATGCCGGACCTTCTGTAGACCTAACCATCTTTTCCCT  
TCACCTAGCGGGCATCTCCTCTATTCTGGGAGCTATCAATTTTATTACCA  
CCATTATTAATATAAAAACCTCCCGCAGCCTCCCAGTACCAAACACCATTG  
TTTGTGTGGGCAGTCCTAATTACAGCTGTACTCCTCCTTCTTTCCCTTCC  
AGTTCTTGCCCGCAGGTATTACTATGCTTCTTACAGATCGAAACCTAAACA  
CCACTTTCTTTGATCCAGCGGGGGCGGAGACCCAATCCTCTATCAACAC  
CTGTTC-----

-----  
-----

-----TTCCTGGAGAGAAACCTTCATCCGTCCAACCTGTCTTGG  
CATGCTGTTGCTGTCTGACGCCCACCAGTGTACAAAGCTGTCAGAGCTCT  
CCTGGGGCATGTGTCTAAGCAACTTCCCTGCCATTTGCAAGACAGAGGAC  
TTTCTCCAATTGCCCAAAGATATGGTAGTGCAGCTTTTGTACACGAGGA  
GCTGGAGACAGAAGATGAGAGACTGGTTTATGAAGCTGCCCTTAATTGGA  
TTAACTATGACCTAGAAAAGAGGCACGTCTACCTCCCAGAGCTTCTGAGA  
ACGGTTCGTCTCGCCTTACTGCCTGCCATCTTTCTGATGGAAAAATGTTTC  
AACAGAAGAGCTGATTAATGATCAGGCCAAAAGCAAAGAACTGGTTGATG  
AAGCTATTCGCTGCAAGCTGAAGATCCTACAGAATGATGGCGTGGTCAAC  
AGCCCATGTGCTCGACCTAGAAAAACCAGCCATGCCCTTTTCTGCTTGG  
CGGACAGACATTCATGTGTGACAAAATTGTACCTGGTAGACCAGAAAGCCA  
AAGAGATAATCCCAAAGGCTGACATCCCCAGTCCCAGGAAGGAGTTCAGT  
GCCTGTGCCATTGGCTGTAAGGTGTACATCACAGGTGGGA--GAGGATC-  
AGAGAACGGTGTTCCAAAGACGTATGGGTCTACGACACTGTGCATGAGG  
AATGGTCCAAAGCAGCACCTATGCTCATCGCCAGGTTCCGGCCATGGCTCC  
GCGGAGCTGAAACACTGCCTATATGTTGTTGGAGGACACACAGCGGCAAC  
GGGCTGTCTCCAGCCTCTCCGTCCAGATGAATACATCGCTTTGTTTAGT  
CGCTCGACAACAAGATTAATTCTGAATGAAGCAGAATAATAATGGCCTT  
AGCCAGGAGTTCCAGATGAGAGTGGTTACAGTATCCCTGGAGGAACAGT  
CTTTTCTTAGTATCATCCAGGTGATTAGTGCTGCTTCCATGTTGGTCAGC



CATCATAAATGGGCTGTCAGGATGGACATCTTCGTTAGATGACTCCCCAG  
CTGACACCATCACCCGGCGCTTTCGCTATGATGTGGCGCTTGTTGGAGCA  
CTGAAGGACCTTGAGGAGGACATCATGGAAGGTCTGAGAGACACTGGGAT  
GGAAGATAGCGCTTGCACCTTGGGCTTTAGAGTCATGATCAAGGAGTGCT  
GTGATGGCATGGGTGATGTTAGCGAAAAGCATGGTGGAGGACCAGCTGTT  
CCTGAGAAGGCTGTTGCGTCTCTCTTCACTGTTATGTCTGTCTCTATCCA  
GGCTGAAGATGAACAG-----GAGG  
AGGTCACAATTTTACAGAGCCAAAGCCCAACTCTGAACTATCCTGTAAG  
CCCCTTTGCCTTATGTTTGTGGATGAGTCTGACCACGAGACTCTCACTGC  
TGTTTTGGGGCCTATAGTTGCAGAGCGAAATGCGATGAAAGAGAGCAGGC  
TCATTTCTATCTATGGGCGGCATGCCACGCTCCTTTCGCTTCCACTTCAGG  
GGCACAGGGTATGATGAAAAGATGGTGCCTGAAATGGAGGGCCTGGAAGC  
TTCGGGATCTACATATATCTGTACTTTGTGTGACTCCAGTCGAGCAGAGG  
CTGCTCAAAACATGGTGTTACACTCCATCACCCGCAGCCATGATGAGAAT  
CTGGAACGTTATGAAATATGGAGAACCAATCCCTTTTCTGAGTCTGTAGA  
TGAGCTACGAGACAGAGTCAAAGGAGTCTCAGCCAAGCCCTTTCTGGAGA  
CCCAGCCCACGCTAGATGCATTGCACTGCGACATAGGCAATGCCACTGAA  
TTCTACAAAATCTTCCAGGATGAAAATGGAGAAGTGTTTAAGAACC---  
CAAC---CCCAGCAGAGAGCAACGGCGCAGCTGGAGGGCAGCCTTGGATA  
AACAGCTGAGGAAGAAGATGAAGCTTAAACCAGTATGAGGATGAATGGG  
AACTATGCCCGAAGGTTAATGACCATGGAGGCTACCGAGGTGGTTTTGTGA  
ACTGGTGCCCTCAGAGGAGAGGAGAGAGGTCCTGAGGGAACATGAGGC  
TCTACCTCCAAATGAAACCTGTGTGGCGTGCCACCTGTCCAGCCAAGGAG  
TGCCCTGACCAGCTGTGCCGCTACAGTTTTAACTCCAGCGCTTTGCCGA  
CCTGCTCTCCGCTACCTTCAAGTACAGGTATAACGGAAAAATAACCAATT  
ACCTGCACAAGACCTGGCCCATGTGCCTGAAATCATAGAGAGAGATGGA  
TCTTTTGGAGCCTGGGCCAGCGAGNNNNNNNNNNNNNNNNNNNTCATATACCATTGAGATGGGTTCCAC  
T

GGGACCTCAATGGAAGGCAAATCCAAGGCCATTCATCTGCTCTATTGAAG  
ACCCAACCAAACAGACAAAGTTCAAGGGTATCAAGACCTACATATCGTAC  
CGAGTGACGCCGAGCCACATAGGCCGGCCAGTTTACAGACGATACAAACA  
CTTTGACTGGTTGTACAACCGTTTGTGTCACAAGTTCCTGTGATCTCTG  
TGCCCTCACCTCCCTGAGAAGCAGGCCACTGGTCCGTTTCGAGGAAGACTTC  
ATCGAGAAGCGTAAGAGGCGACTGATACTGTGGATGAACCACATGACCAG  
CCACCCAGTCTCTCGCAGTATGAAGGCTTTGAGCACTTTCTGATGTGTG  
GTGATGATAAGCAGTGGAAACTGGGTAAGAGGCGGGCAGAGAAGGACGAG  
ATGGTGGGAGCCATTTTCATGCTGACCCTTCAGATCCCCAACGAACACCA  
GGACCTTCAGGACGTCGAGGAGAGGGTTGACAACCTCAAGACTTTCGCCA  
AGAAAATGGACGACAGTGTGATGCAGCTCACGCACGTTGCCTCAGAGCTC  
GTCCGTAAGCACCTGGGCGGGTTCAGGAAGGAGTTCAGCGACTTGGGAA  
TGCCCTCCAGTCTATTAGCCAGGCTTTCACACTGGACCCACCCTACAAGT  
CAGATGCCCTCAACAACGCCATCTCCACNNNNNNNNNNNTTTCCTCAAATTAACCTCCCT  
GGGTTTCATCATTGGAGTCGGTGTGGTAGGGAACCTCCTGATCTCAATCC  
TGCTGGTTAAAGACAAGAGCCTGCACCGGGCACCTACTATTTCTACTG  
GACCTGTGCGCCTCGGATATCCTACGCTCCGCTATCTGCTTCCCCTTTGT  
CTTACCTCTGTAAAGAATGGATCTGTCTTAACCTACAGCATACTGACCT  
GCAAAGTGATCGCCTTCCCTCGGTGTGCTCTCCTGTTCCATACAGCATTC  
ATGCTCTTCTGCGTCAGCGTACCCGCTACCTGGCCATCGCGCATCACCG  
CTTCTACACCAAGAGGCTGACGTTCTGGACGTGCTTGGCCGTCAATTGCA  
TGGTGTGGACGTTGTGCGTGGCCATGGCGTTCCTCCGGTGTAGACGTC  
GGGACGTACAGTTTCATCCCGGAGGAGGACCAGTGTACGTTTCAGCACCG  
CTCCTTCCGGGCGAACGACTCGCTGGGCTTCATGCTCCTGCTGGCGCTCA  
TCCTTCTGGCCACGCAGCTGGTTTTACCTCAAGCTCATCTTCTTCGTCCAC

GACCGCCGAAAGATGAAGCCCGTCCAGTTCGTGCCTGCCGTTAGCCAGAA  
CTGGACCTTCCATGGGCCGGGCGCCAGCGGGCAGGCGGGCGCCAACCTGGC  
TGGCCGGGTTTTGGCCGGGCCCCACCCCGCCTACTTTGCTGGGGATCCGA  
CAGAACAGCAACGCAGCGGGCCGCAGACGTCTTCTGGTGCTCGATGAGTT  
CAAAACGGAGAAGAGGATTAGTAGGATGTTCTACATAATGACATTTTTCT  
TCTTGGCTCTGTGGGGGCCCTACCTGGTTGCCTGCTACTGGCGCGTGTTT  
GCCAGGGGCTCTGTGGTCCCTAGAGGGTACCTGACAGCAGCCGTGTGGAT  
GAGCTTTGCCAGGCCGGGGTCAATCCTTTCATCTGCATCTTCTCCAACA  
GGGAGGCCAAATCTCGCTTTCACCCCTGGCGTGGGGACTGGTCTTGGCAGC  
GAGC---GCAGCGTCCCACTCGGCAACAGCTTGCTGTCCCCGCAGCAAAG  
CGAGGAGCCCACTGTTGCCACCCCCCGCAGCGTTGGTTTTGTCACCC---  
CTGCCAACAACCGACTGGACTTTGCCGCCTCGGCATACGACGCCGCC---  
-----GATTTCCGCCGTAACGCGGCCACCTTGCTGTCTACGCAGCGGC  
CGGAGTAAAGGCTC-----TCCCCCTCCCGACAGCGGGCTGCTCCAATC  
GGCTCTTGGCTATTACGCAGACCCGTCTG---GCTGG---GGAGGACGC  
ACGCCACCACAGTACTGCGGGCTAAACAGTAAATCCAGCTCGGTCTTTTC  
CTGCTGGCCGACCAACTCTCTTGGAGGCAGGGCGAGCA---CC---AACT  
ACCTGT-----CGGAGGA---GGGA---GACTC---TATCGCGACC  
GAGAGTACCCG---AT---CGGTGTTTCGGAAGAG---ACCAAACCCAA  
AGACATCAC---ATCAGA---GTCCAGCTGGATAGAG---ACGCCGTCGT  
CSATAAAGTCGATTGATTCCAGCGATTCTGGGATCTTTG---AACAGGCC  
AAAAGAAGACGGATCTCCCCCTTGCCACCCG-----GTCTCAGA  
GACAGTGTCCCCATTAAAATCCGAGCATCACTCAACAGGAGAGGTGGCGG  
AGCGGGAAGTGGCGCTGGGGATCAACCCTTTCGCGGACGGCATGGGCGCC  
TTCAAGATCAACCACAGCTCCCACGACATCAGCTCCGG---GCAGACAGC  
GTTCTCATCCCAGGCT---CCCGCTATGCAGCGGCGGCCGCCCTGGGA-  
--CACCACCA-----TCACCCGACCCACGTCGGTTCC---TACTCCAG  
GCGGCGTTCAACTCCACCAGAGACTTCTCTTCAGAAATCGGGGTTTCGG  
GGACGCGGCTGG-----GGCGCAGCACAGCCTGTTTGCCTC--  
-----CGGCAGCTT---C-----GGGGGCGGCACGGACATTCGGAC  
GCGGCGGGGCACCTACTCTTCCAGGGCTCCACGAG---CAGGCGGCGAG  
CCACGCGTCCCTCCAACGTGGTGAACAGCCAGATGCGACTGGGCTTCTCAG  
GGGACGTGTACGGCCGGGCTGATCAGTATGGGCATGTCACGAGCCCGCGT  
T---CCGATCACTACGCATCCACACAGCTACACGGCTACGGCCCCATGAA  
CATGAATATGGCTGCG---CACCACGGAGCGGGGCCTTTTTCCGCTACA  
TGAGGCAGCCCATCAAGCAGGAGCTCATCTGCAAGTGGATCGAGCCGGAG  
CAGTTGACAAACCCCAAAAAGTCGTGTAACAAAACTTTCAGCACCATGCA  
CGAGCTGGTGACTCACCTGACAGTGGAGCACGTGGGGGGCCTGAACAGA  
CGAACCATATCTGCTTTTGGGAGGACTGCTCCAGAGAAGGGAAGCCCTTT  
AAAGCCAAATACAAACTTGTAATCACATCAGAGTGCACACCCGGAGAAAA  
GCCCTTCCGCTGTCCGTTTCCCGGCTGCGGCAAA

>Gasterosteus aculeatus

AGCCTTCTAATTTCGAGCTGAATTAAGTCAACCCGGAGCTCTCCTTGGGGA  
CGACCAAATTTATAACGTAATTGTTACAGCCCATGCTTTCGTAATAATCT  
TCTTTATAGTTATAACCAATCATGATCGGAGGCTTTGGCAACTGACTTATC  
CCCCAATGATCGGAGCCCCCGATATAGCATTTCCACGAATAAACAACAT  
GAGCTTCTGATTGCTCCCACCCTCTTCTTACTTCTCCTTGCCCTCTTCAG  
GGGTGAAGCTGGTGCAGGGACAGGGTGAACAGTTTATCCACCCCTCTCT  
GGGAACCTCGCCCATGCAGGTGCTTCAGTCGACCTAACAATCTTTTCACT  
TCATCTTGCAAGGATTTTCATCAATTCGGGGCAATCAACTTCATTACCA  
CAATTATTAACATGAAACCTCCCGCTATTTCTCAGTACCAAACGCCCTTT  
TTCGCTGATCTGTTCTCATCACTGCAGTCCTTCTTCTCCTATCCCTGCC  
CGTCTTGCAAGCCGAATCACTATGCTTTTAAACAGACCGAAACTTAAACA

CCACTTTCTTCGACCCAGCAGGGGGTGGAGACCCAATTCTTTACCAACAC  
TTATTTTGATTCTTCGG-----  
-----  
-----  
-----  
-----

NNNNNNNNNNNNNNNNNNNNNNNNNNNNNNNNNNNNNNNNNNNNNNNNNNNNNNNNNNNNNNNNNNNNNNNGTGCA  
CCAAGCTGTCCGAGCTCTCCTGGGGCATGTGCC  
TCAGCAATTTTCCCGCCATTTGCAAGACAGAAGACTTCCTCCAGCTGCCC  
ACAGATATGGCGGTGCAGCTGTTGTCACACGAGGAGCTGGAGACGGAAGA  
CGAGAGACTGGTTTATGAAGCTGCCCTTAACTGGATCAACTACGACCTGG  
AGAAGAGGCACTGCCACCTTCCAGAGCTCCTGAGGACTGTCCGTCTGGCC  
TTGCTGCCCGCCATCTTCCTCATGGAGAACGTCTCGACAGAAGAGCTGAT  
CAATCCCAGCCCAAGAGCAAGGAGCTGGTGGACGAGGCCATCCGATGCA  
AGCTGAAGATCCTGCAGAACGACGGCGTTCGCAACAGCCCCTGTGCCCGG  
CCCAGAAAGACCAGCCACGCCCTGTTCTTCTGGGAGGTTCAGACGTTCAT  
GTGTGACAAGTTGTACCTCGTGGACCAGAAAGCCAAGGAGATCATCCCA  
AGGCTGACATCCCCAGCCCAGGAAGGAGTTCAGCGCCTGCGCCATCGGC  
TGCAAGGTGTACATCACTGGTGGGA--GAGGCTC-AGAGAACGGCGTGT  
CAAAGACGTGTGGGTTTACGACACCGTCCACGAGGAGTGGTGAAGGCGG  
CGCCGATGCTCATCGCCCGCTTCGGCCACGGCTCGGCAGAGCTGAAACAC  
TGCCCTACGTGGTGGCGGTCACACGGCGNNNNNNNNNNNNNNNNNNNNNNNNNNNNNGGATGATTAC  
GTCGTCGTGT

TCAGTCGCTCGGCAACGAGGCTGATACTGAACGAAGCTGAGCTAATCCTG  
GCGCTGGCCAGGAGTTCAGATGAGAGTGGTACGCGTGTCCCTGGAGGA  
TCAGTCCTTCCCCGGTATCGTCCAGGTGATCAGCGGCGCCTCCGTGTTGG  
TCAGTATGCACGGCGCTCAGCTCATCGCGTTCGCTTTCCTCCCCAGAGGG  
GCGACCGTGGTGGAGCTGTTCCCTTTGCTGTGAACCCAGAACAGTACAC  
CCCGTATAAAACCCTGGCCACCCTTCGGGAATGGACCTTCACTATATCT  
CCTGGAGGAACACTAAGGAGGAGAACCATCACCCACCAGACAGACCC  
TGGGAGCAGGGGGCATCGCTCACTTGGAGAAGGAGGCAAGAGCGCAT  
ACTGGCAGCCGAGACGTCCCAGGCACCTGTGCTGCCGCAACCCAGAGT  
GGCTTCCGGATCTACCAGGACAGTTGGTGGACATCCCCTACTTCCTG  
GAGACCCTTAG---AGAGGGCATGAAG---ACAAAGCCCAGCGGGAAGAA  
---GTCAAAGCCGGCCAGCACAGTCCACCCGGGCGGTGAGGGAGCCGC  
AGTGTACAGACCTCGGTACAACCAACGAGGCTAAACTCACAGTTTCC  
TGGCAGATCCCATGGAATCTGAAATACCTAAAGGTGAGAGAGGTGAAGTA  
CGAGGTGTGGATCCAGAAACGGGACACTAGTAAGGGGACGCTGGAGGACC  
AGATTATCCAGGCCAACCCGGCACTGGAGGCCTTTGGAAATGCCAAAACG  
CTGAGGAATGACAACCTCATCTCGTTTTGGGAAATTCATCCGAATCACTT  
TGGTACAAGTGGGAAGCTGTTCATCTGCCGATATCGAGACTTACCTGCTGG  
AAAAGTCCCAGTGCACCTTTCAGCTCAAGGCTGAGAGGAACTACCACATC  
TTCTACCAGATCCTCTCCAATCAGAAGCCAGAGCTGCTGGACATGCTGCT  
GATACCAACAACCATACTACTCCTACATCTCCCAGGGAGAGGTGA  
CGGTGGCCTCCATCAATGACTCGGAGGAGCTGCTGGCCACCAGACAGCGCC  
TTTGACGTGCTGGGCTTCACTCCGGAGGAGAAGATGGGTGTCTATAAACT  
CACCGGGGCCATTATGCACTACGGCAACATGAGGTTCAAACAGAAGCAGC  
GCGAGGAGCAGGCTGAGCCGGACGGGACCGAGGCCGCTGATAAAACAGCC  
TACTTGATGGGGCTGAACCTGCGGACCTCATCAAGGGGTGTGTGCATCC  
CAGGGTGAAGGTGGGAATGAATACGTAACCAAAGGTCAAAGTGTGGACC  
AAGTCTACTACCAAACAAGGAAGCCTTCAAGTGTGAGGAGTGCCGGGAAG  
CACTACAACACCAAGCTGGGATATAAGCGCCATGTGGCCATGCACTCTGC  
CACGTCAGGGGATCTCACCTGCAAAGTGTGCATGCAGAGCTACGAGAGCA

CACCCGTGCTCCTGGAGCACCTCAAGACCCACTCCGGAAAGTCTTCGGGT  
GGCGCAAGGAGAAGAAGCACCCGTGCGACCACTGTGACCGCCGTTTCTA  
CACGCGCAAGGACGTGAGACGACACATGGTGGTCCACACGGGCCGAAAAG  
ATTTCTCTGCCAGTACTGTGCCAGCGCTTTGGCAGRAAGGACCATCTG  
ACGCGTCACGTTAAGAAGAGCCACTCACAGGAGCTGCTGAGGATCAAGAC  
GGAGCCTTCGGATATGTTAGGTCTTTTAGCGTCCGGGTACCGCCCTGCT  
CTGTGAAGGAGGAGCTCAGCCCCATGATGTGCGGTATGGGTCCCAACAAA  
GACCAATGATGGGCAAACCGTTCCTTAGCGGGGCCCTTTTCCGATGAG  
CATGTACAACCCCCACCAT-----CTCCAGGCCATGTCTAATTCTGGGG  
TGGGTACCCG-----CACCCATCCCTGATGCCCGGTCCCTTGCTGCA  
GCTATGGGTATGGGTGCCACATGGAATATCTGATATACGCCTCTTTTTC  
GTTTCATGGGATGTTTACAGATCAGCGATGGATCAAACGTAGTGAACCTCT  
TGGCAAGTAACCTCCGAGTGTTCGTACGCTATGACGCAGCAGAAATAC  
TTCAGCAACTACAGTCCCCTGATTGGGTCTACATTTATGAGCCCGTCGA  
GTACTGGAACTCCACGGTGCAGGAACACCTGAAGACCCTGAGTCATGGTT  
TCAACAAGATCTCTTGGATGGACAACTTTTTCCACTACCTGCGTGTGGTA  
AATGTGAGTGCCTCGACCAAGAGTGACTTCATCTCCATCCTCAAGGGCTC  
CTTCCCTTCGAGCCCAGGTACAGCACTTCAATGAGGACATCATATTTT  
CCATGA---ACCGCGAAACCG-----AAGAGTACGACATTATCGCCTCG  
CGGATCTACCTGGTGGCGCGACAGCAGAGAAGAAGCGAGAGGAGTGGT  
GGAGCTTCTGGAAAAGCTTCGACCGTGGATGCTGATCAACAGCATCAAGT  
TCATTGCATTCAATCCTACGTTTGTGTTCATGGACCGCTACAGCTCCTCT  
GTTATCTCACCCATCCTGACCTCAGGCTTTCAGCGTACTCACAATCCTCAT  
CCTCACTTTTCTTCTGGTTCATCAATCCGTTGGGAAACTTCTGGCTCATCC  
TCACGTAAACGTCCGTGGAGCTCGGCGTCTTGGGTTGATGNNNNNNNNNNNNNNGAATGGCAA  
CCAGCWCTCAAGAACGTGTCTACGTCTGCACCGTGGCATCATTAATGG  
GCTCTCTGGATGGCCCTCCTCGGTGACGACTTCCCTGCTGACACCACCA  
CTCGACGTTTTCGGTACGACGTGGCTCTGGTGTGACGTTTTAAAGGATCTG  
GAGGAGGACATCCTGGAGGGGTTGAGAGAGAGCGGCATGGAAGACAGCGC  
TTGCACCTCAGGCTTTCAGCGTCATGATCAAGGAGTCTGACGGCATGG  
GGGACGTCAGCGAGAAGCAGCGGAGGACACCAGTTCCTGAGAAGGCT  
GTGCGTTTTTCTTTACTGTCTGTCTGTCTGTGCTGGCAGACGAGGA  
GGTG-----GAAGAGGTTACCATCT  
TCACTGAGCCAAAGCCAAACTCAGAAGTCTGCTGTAAGCCTCTTTGCTTG  
ATGTTTCGTGGATGAGTCGAACACGACGCTCACAGCTGTCTGCGGGCC  
AATAGTTGCCGAGCGCAATGCGATGAAAGAAAGCAGGCTCATCTCTCCG  
TGGGCGGACTCCCTCGTCTCTCCGCTTTCACTTTCAGGGGACGGGATAT  
GATGAGAAGATGGTGCAGGAGGTAGAGGGCCTGGAGGCGTCAGGGTCCAC  
CTACGTCTGCACTCTTTGTGACTCCACTCGCGCGGAGGCCTCTAAAAACA  
TGGTGTGCACTCCATCACCCGAGTCACGAAGAGAACCCTGGATCGTTAC  
GAGATATGGAGAACCAACCCGTTTTCTGAATCTGTGGAGGAGCTGCGGGA  
CAGAGTCAAAGGGATCTCTGCCAAACCCTTCATGGAGACCCAGCCACGA  
TGGATKCACTGCACTGTGACATCGGCAACGCCACAGAGTTCTACAAGATC  
TTCAGGACGAGATCGGGGAGGTGTACCGAAAGGT---CAAC---CCCAG  
TCGGGAAGAACGGCGAAGCTGGAGGGGCGCTGGACAAACAGCTCAGGA  
CGAAGATGAAGCTCAAACCGGTGATGAGGATGAATGGGAACTACGCCCCG  
CGGCTAATGACCCAAGAGGTGCTGGAGGTGATTTGTGAGCTGGTGCCTC  
CGAGGAGAGGAGGGAGGCCCTGAGGGAGCTGATGAGGCTCTACATCCAAA  
TGAAGCCTGTGTGGCGGCCACCTGCCCGGCAAGGAGTGCCCCGACCAG  
CTCTGCAGCTACAGCTTTAACTCCAGCGCTTTCGCGACCTTCTCTCCTC  
CACCTTCAAGTACAGGTACAACGGAAAGATAACCAACTACTTGACAAGA  
CTTTGGCCCATGTGCCTGAAATCATAGAGAGANNNNNNNNNNNNNNNNNNNN  
NNNNNNNNNNNNNCGTACACCATCGAGATG

GGCCCCCTGGGGCCCCCTGTGGAAGGAGAGCCRCAGCCGTTCTCCTGCTC  
CRTYGAGRACCCACGAAACAGACCAAGTTCAARGGCATCAAGACGTACA  
TCTCGTACCGGGTACGCCGAGYCACACGRGMATCCCGTCTACAGGCGC  
TACAAACATTTGACTGGCTCTACAACCGCTGCTGCACAAGTTCACTGT  
GATCTCCGTGCCTCACCTGCCCGAGAAGCAGGCCACGGGGCGATTTGAGG  
AAGACTTCATCGAAAAGCGCAAGAGGGCGACTGGTACTGTGGATGAAACAC  
ATGACCAGCCACCCGGTCTCTCCAGTATGAGGGCYTYGARCACTTTCT  
GATGTGCGGCGAYGACAAGCAGTGGAAAGCTCGGCAAGAGGGCGGGCGGAGA  
AGGACGAGATGGTGGGAGCCATTTTCATGTTGACCTGCAGATCCCCACC  
GAGCACCAGGACCTYCAGGATGTGGAGGAGCGCATCGACACCTTCAAGTT  
CTTCGCCAAGAAGATGGACGACAGCGTGATGCAGCTCACGCACGTCGCCT  
CGGAGCTGGTGCGCAAGCACCTGGGCGGGTTCAGGAAGGAGTTCCAGCGG  
CTGGGAAATTCTTTCCAGTCCGTGAGCCAGGCGTTCATGCTTGATCCTCC  
CCAAAGTTCAAGAGCCCTCAACAAAGCCATCTCCCATCCTCTCGCCACGT  
TCCTCAAAGTACCTCTCTGGGTTTCATCATTGGAGTCGGTGTGGTCGGA  
AACCTCCTGATCTCCATCCTGCTCGTCAAAGACAAGAGTCTGCACCGAGC  
GCCCTACTATTTCTGCTGGACCTGTGCGCCTCTGACATCCTGCGCTCTG  
CCATTTGCTTCCCCTTTGTCTTACCTCGGTCAAGAATGGATCCGCCTGG  
ACGTATGGCAGCTGACCTGCAAAGTATCGCCTTCTGGGTGTGCTCTC  
CTGTTTCCACACGGCGTTTATGCTCTTCTGCGTCAGCGTCACGCGTACC  
TGCCATCGCGCACACCCTTCTACACCAAGAGGCTGACCTTCTGGACC  
TGCCTAGCCGTATCTGCATGGTGTGGACGTTGTCGGTGGCCATGGCCTT  
CCCGCCGGTGTCTGACGTGGGGACGTACTCTTTTCATCCGGGAGGAGGACC  
AGTGCACGTTCCAGCACCGCTCCTTCAGGGCGAATGATTTCGCTGGGCTTC  
ATGCTCCTGCTGGCGCTCATCCTCCTGGCCACGCAGCTGGTTTACCTCAA  
GCTCATCTTCTTCGTCCACGACCGTCCGGAAGATGAAGCCCGTCCAGTTTG  
TGCCCTGCCGTARCCAGAAGTGGACCTTCCACGGGCTGGTGGCAGCGGG  
CAGGCGCGGCCAACTGGCTGGCCGATTCGGTCGAGGCCACCCCGCC  
TACCTTGCTGGGCATCCGGCAGAACAGCAACGCAGCGGGCCGAGGCGTC  
TGCTGGTATTGGATGAGTTCAAACAGAGAAGAGGATTAGCAGGATGTTT  
TACATCATGACGTTTTTCTTTCTGGCGCTATGGGGCCCTACCTGGTCGC  
CTGCTACTGGCGGGTGTGTTGCAAGGGGCCCCGTGGTCCCCGGAGGCTACC  
TGACGCGCCCGTGTGGATGAGCTTTGCCAGGCGGGGTCAATCCTTTC  
ATCTGCNNNNNNNNNNNNNNNNNNNGCCAAATCTCGCTTTCACCCCTGGCGTG  
GGGACCGGCCCTGGCAC  
GGAGC---GCAGCGTCCCACTCGGCAACAGCTTGTCTCCCCGCAGCAA  
CCGACGAGCCCACTGTTGCCACCCCCCGCAGCGATGGTTTGTACCC--  
-CTGCCAACACCGACTGGACTTTGCTGCCTCGGCATACGACGCCGCC--  
-----GATTTCCCGGCAACGCGGCCACCTTGTGTCTTACGCAGCGG  
CCGGAGTGAAGGCTC-----TTCCCCTGCCGACTGCAGGCTGTCCAAC  
CGGGCCCTTGGCTATTACGCGGACCCGTCGG---GCTGG---GGAGGACG  
CACGCCCGCGCAGTACTGCGGYGTCAACAGCAAATCCAGCTCGGTCTTTT  
CCTGCTGGCCCCGAAACTCTATCGGTGGCAGAGCAGGCA---CC---AAC  
TACCTGG-----CCGAGGA---GGG---GACTC---CATCACGAC  
GGAGAGGTCCCG---AT---CGTCGGCTCGGAMGAG---AGCAAAGCCA  
AAGACATGAC---GTCCGA---GTCGAGCTGGATAGAG---ACGYCGTCC  
TCCATTAAGTCAATTGATTCAAGCGATTCTGGTATCTTTG---AACAGGC  
TAAGAGGAGAAGGATCTCACCTTCTGCCACGCCG-----GTTCTG  
AGACAGTGTCCCCGTAAAGTCTGAGCATCACTCAACAGGCGAAGTCACA  
GAGAGAGAAGTAGCGTTGGGGATCAATCCGTTTCGCGGATGGGATGGGCGC  
CTTCAAATAAACCACAGCTCCACGACATCGGCTCCGG---ACAAACGG  
CGTTTCTCTCAGGCG---CCCGGTAC---GCAGCGGCCGCCCTGGGA  
---CACCATCA-----CCACCCGACCCACGTTGGCTCT---TACTCCAC  
GGCGGCTTCAACTCCACCAGGGACTTCTCTTCAGAAATCGGGGTTTCG

GGGACGCCACCGG-----GGCGCAGCACAGTTTGTTCGCCTC-  
-----CGGGAGTTT---C-----GCAGGGCCACATGGACACTCGGA  
TGCAGCGGGGCACCTGCTCTTCCCAGGACTCCACGAG---CAAGCGGCGA  
GCCATGCGTCTTCCAACGTGGTCAACAGCCAGATGCGGCTGGGCTTCTCG  
GGGGACATGTACGGGCGGGCCGACCAGTACGGCCACGTTACAAGCCCGCG  
GT---CCGACCACTACGCATCGACCCAGCTGCACGGCTACGGCCCCATGA  
ACATGAATATGGCCGCG---CACCACGGAGCGGGGCCTTCTTTTCGATAC  
ATGAGGCAGCCGATCAAGCAAGAGCTCATCTGCAAGTGGATCGAGCCGGA  
GCAGCTGACGAATCCCAAAAAGTCGTGCAACAAAACTTTTAGCACGATGC  
ACGAGCTCGTGACCCATCTGACGGTGGAGCATGTGGGGGGACCAGAGCAG  
ACCAACCACATCTGCTTCTGGGAGGAATGCGCCGAGAAGGAAAAGCCGTT  
CAAAGCCAAATACAAACTTGTGAACCATATCAGAGTACACACCCGGAGAAA  
AGCCCTTCCCGTGTCCGTTCCCCGGCTGTGGCAA

>Gazza minuta

AGCCTGCTTATCCGGGCAGAATTAAGCCAACCCGGCGCCCTCCTCGGAGA  
CGACCACATCTACAATGTTATCGTCACCGCCCATGCATTCGTAATAATTT  
TTTTTATAGTCATACCTATTATGATTGGAGGCTTTGGCAACTGACTAATC  
CCCCAATGATCGGGGCCCTGATATGGCATTCCCCCGAATAAATAACAT  
AAGCTTTTGGCTTCTGCCTCCCTCGTTTCTGCTGCTGTTAGCATCTTCCG  
GCATTGAAGCTGGTGCTGGCACAGGGTGGACAGTCTACCCCTTTGGCG  
GGGAATCTTGCCCATGCAGGAGCTTCTGTTGACCTGACAATCTTCTCACT  
ACACTTGGCTGGGATTTCCCTCAATTTTAGGGGCAATCAACTTTATTACAA  
CAATCATTAATATAAAAACCCCTGCAATTTTACAATTCCAAACCTTTTG  
TTTGTGGGCTGTGCTTATCACAGCCGTGCTTCTTCTACTTTCCCTTACC  
AGTTCTCGCAGCCGGCATCACTATGCTCCTAACAGATCGAAATCTAAACA  
CTACTTCTTCGACCCTGCAGGAGGGGGAGACCCAATTCTGTACC-----  
-----  
-----  
-----  
-----

-----TTCCCTTGAGAGAAACCTTCACCCATCCAACCTGCCTTGG  
CATGCTGCTGCTGTCCGATGCCACCAGTGCACCAAGCTATCTGAGCTCT  
CCTGGGGCATGTGCCCTCAGCAACTTTCCCTGCTATTTGTAAGACGGAGGAC  
TTCCCTCCAACCTGCCCAAAGATATGGTGGTCAACTTTTGTACATGAGGA  
GTTAGAGACAGAAGATGAGAGACTCGTTTACGAAGCTGCTCTCAACTGGA  
TCAACTATGACCTGGAAGAGAGGCACTGTCACCTTCCAGAGCTTCTGAGA  
ACGGTGCCTCTGGCCCTGCTGCCTGCCATCTTCTCATGGAGAATGTGTC  
CACAGAAGAGCTCATCAACACCCAGGCCAAGAGCAAGGACCTGGTAGATG  
AAGCCATCCGTTGCAAGCTGAAGATCCTGCAGAATGACGGTGTGGTCAAC  
AGCCCGTGTGCCAGACCGAGAAAAACAGTCAATGCCCTCTTCTCTGCG  
AGGTCAGACTTTTATGTGCGACAAGTTGTACCTGGTGGACCAGAAAGCCA  
AAGAGATCATAACCAAGGCTGACATTTCCAGCCCTCGGAAGGAGTTCAGC  
GCTTGTGCCATTGGTTGTAAGGTATACATCACTGGTGGGA--GAGGGTC-  
TGAGAATGGCGTGTCCAAAGATGTGTGGGTCTATGACACTGTCCATGAAG  
AATGGTCAAAGGCAGCACCCATGCTCATTGCTCGGTTTGGCCATGGGTCC  
GCAGAGCTGAAACACTGCCTGTACGTTGTGGGAGGTCACACAGCCGCAAC  
CGGTTGCCTTCCCTGCCTCTCCATCCGGAGGAGTACATTGTTGTGTTTCAGC  
CGCTCGACAACAAGGCTGATATTGAATGAAGCAGAGCTAATCATGGCACT  
GGCCAAGAATTCCAGATGCGAGTCGTACAGTATCCCTGGAGGACCAGT  
CGTTCCCCAGTATCGTCCAGGTGATCAGCAGCGCTACTATGCTGGTCACT  
ATGCATGGAGCTCAACTTATCACATCGTTTTTCCCTTCCAGAGGAGCTGC  
TGTGGTGGAGCTGTTCCCTTTGCTGTGAACCCAGAGCAGTACACCCCAT  
ACAAGACCCTTGCCCTCCCTACCAGGTATGGACCTTCATTATGTCTCCTGG



AGGAATACCAAGGAGGAGAACACCATCACCCATCCAGACAGGCCCTGGGA  
GCAAGGGGGCATCGTGCACCTGGAGAAGGAGGAGCAGGAAAGAATCATGA  
GGAGCAAAGATGTCCCAGGCATCTGTGCTGCCGCAACCCAGAGTGGCTC  
TTTCGGATCTATCAGGACACTCTGGTGGACATCCCGTCCTTCTGGAGGT  
CCTCAA---GGAGGGCATGAAA---ACAAAGCCCATCTTGAAGAA---AT  
CAAAGCCAGTCACCACAGTCCACCCGGGCCGGGTCAGAGAAGCCAGTGT  
CAGACCTCTGTACAAGCTGCTAACGAGGCCAAACTCACAGTCTCCTGGCA  
GATCCCGTGGAAATCTGAAATACCTGAAGGTGAGGGAGGTGAAATATGAGG  
TGTGGATCCAGAAAAAGACAGCAGCAAAGGGACCCCTGGAGGACCAGATC  
ATCCAGGCCAATCCTGCTCTGGAGGCCTTCGGCAACGCCAAGACGCTGAG  
GAATGACAACCTCATCACGTTTTGGAAAATTCATCCGAATTCACTTTGGTA  
CAAGCGGCAAACCTTTCATCTGCCGACATTGAGACGTACCTGCTGGAGAAG  
TCAAGAGTCACTTTTCAGCTCAAGGCTGAGAGGAACTACCACATCTTCTA  
CCAGATCCTGTCCAATCAGAAGCCGAGCTGCTGGACATGCTGCTGATCA  
CCAACAACCCCTACGACTACTCCTACATCTCCCAAGGAGAAGTAACAGTC  
GCCTCCATTAACGACTCGGAGGAGCTGATGGCCACTGACAGCGCCTTCGA  
TGTGCTTGGCTTACCGCAGAGGAGAAGATAGGTGTTTACAAGCTGACGG  
GCGCCATCATGCACTATGGCAACATGAAGTTCAAGCAGAAACAGCGTGAG  
GAGCAAGCTGAGCCAGATGGCACCGAAGCTGCTGATAAATCTGCATACCT  
GATGGGGCTGAACTCCGCTGACCTCATCAAAGGGCTCTGCCACCCCGAG  
TCAAAGGTAGAAAACGAATACGTCACCAAAGGTCAGAGTGTAGATCAGGTC  
TACTACCCCAACAAGGAGGCCTTCAAGTGCAGAGGAGTGTGGCAAGCATA  
CAACACCAAGCTGGGATACAAGCGTCATGTGGCCATGCACTCCGCCACGG  
CAGGCGACCTCACCTGCAAGGTGTGCATGCAGACCTACGAGAGCACGCCC  
GTGCTGCTGGAGCACCTCAAGAGCCACTCGGGGAAGTCCTCGGGCGGCAC  
CAAGGAGAAGAAACACCCGTGCGACCACTGCGACCGCCGCTTCTACACGC  
GGAAGGATGTCAGGCGGCACATGGTGGTCCACACGGGCCGGAAGGACTTC  
CTGTGCCAGTACTGTGCCAGCGCTTCGGCAGGAAGGACCACCTGACGCG  
GCACGTGAAGAAGAGCCACTCGCAGGAGCTGCTGAAGATCAAGACGGAGC  
CTCCCGACATGCTGGGCCTGCTCGCGTCCGGGTCCGCCCGCTGCTCCGTG  
AAGGAGGAGCTCAGCCCCATGATGTGCGGCATGACTGCCAACAAAGACCC  
CATGATGGGCAAGCCCTTCCCCGGGGGGCCCCGTTTCAGATGGGCATGT  
ACAACCCCAACCAC-----CTCCAGGCCATGTCGAATTCGGGGTGGGT  
CACCCG-----CACCCGTCCCTGATGCCCGGCCGCTGTCTGCGGCCAT  
GGGCATGGGCTGCCACATGGAANNNNNNNNNNNNNNNNNNNNNNNNNNNNNTGTTTACAAATCAGT  
GATGGATCGAACA  
TTGTGAACCTGCTAGCTAGTAACTCTCCGAGTGTTCGTATGCTCTGACC  
CAGCAAAAATACTTTAGTAACTACAGCCCTGTGATTGGCTTTTATATTTA  
TGAGCCCATAGAGTACTGGAACCTACAGTGCAGGAGCACCTGAAGACTC  
TGAGTCATGGCTTCAACAAGATCTCTGGATGGACAACCTTTTCCATTAC  
CTGCGGGTGGTGAACGTGAGTGCCTCAACCAAGAGCGACTTCATCACCAT  
CCTCAAGGGCTCATTCCTGCGCAGCCMGAGTACCAGCACTTCACTGAGG  
ACATCATATTCTCCAAGA---ATCGCGAGACAG-----ACGAGTATGGC  
ATCATCGCCTCTCGGATGTACCTGGTGGCGAGGACGACAGAGAAGAAGCG  
CGAAGAGGTGGTGGAGCTCCTGGAGAAGCTTCGCCCTTTGATGCTGATCA  
ACAGCATCAAATTCATCGCCTTCAATCCCACGTTTGTGTTTATGGATCGC  
TACAGCTCGTCCGTCATCTCGCCCATCCTGACCTCAGGATTCAGCGTGCT  
CACAATCCTCATCCTCACTTTCTTCTGGTTCATCAACCCCTGGGAAACT  
TCTGGCTCATCCTCACTGTAACGTCCGTGGAGCTGGGTGTCTTGGGTCTG  
ATGGGCTTTCACCAGTTTGAATGGCAGCCAGCACTCAAGAATGTATCTAC  
ATCTTGCAATGTTGGCATTATTAATGGACTCTCTGGATGGACCTCCTCAG  
TGGATGACGCCCCAGCTGACACCATAACACGTCGTTTCCGCTACGACGTG  
GCTCTAGTGTGAGCACTAAAGGACCTGGAGGAGGACATCATGGATGGGCT

GAGGGAGCAAGAGATGGAGGACAGTGCTTGCCTTTCAGGTTTCACTGTCA  
TGATCAAGGAGTCTTGGCGATGGCATGGGTGACGTCAGTGAGAAGCACGGA  
GGAGGACCAGCTGTTCCGGAGAAGGCTGTGCGTTTCTCTTTCCTATCAT  
GTCTATCTCAGTGAGGACAGATG---AGGAG-----  
-----AAAGAAGTCACTATCTTTCACAGAGATGAAGCCAAACTCA  
GAGCTGTCTTGTAAAGCCCCTCAGCCTCACATTTGTGGATGAGTCAGACCA  
TGAGACACTCACAGCCATCCTGTGGCCTATTGTTGCAGAGCGTAACGCGA  
TGAAAGAGAGCAGGCTGATCCTGTCCATTGGCGGACTGCTTCGCTCCTTC  
CGCTTTCATTTTCAGAGGCACAGGATATGATGAGAAGATGGTACGTGAGAT  
GGAGGGCCTCGAAGCCTCAGGGTCCACTTACATCTGCACACTTTGTGACT  
CAAGTCGAGCGGGGGCCTCTGAAAACATGGTGTGCATGCCATAACTCGG  
TCCCATGAAGAAAACCTAGAGCGATACGAGATATGGAGAAGCAACCCTT  
TTCTGAGTCAGCAGATATGCTTCGAGACAGAGTCAAAGGCGTCTCTGCTA  
AGCCCTTCATGGAGACACATCCACGATGGACGCATTACACTGCGACATC  
GGCAACGCCACTGAGTTCTACAAAATCTTCCAGGATGAGATCGGGGAGGT  
GTTTGAAGAGCC---CAAT---CCCAGCCGGGATGAGCGCCGACGCTGGA  
GGGCAGCCCTGGATAAACAGCTGAGGAAGAAGCTGAAGCTCAAACCGGTG  
ATGAGGATGAATGGGAACATGCCCGCCGGCTAATGACCACAGAGGCTGT  
GGAGGCGGTGTGTGAGCTGGTGCCCTCAGAGGCAAGGAGGGAGGCCCTGA  
GGGAGCTGATGGAGCTCTACCTCCAGATGAAGCCTGTGTGGCGAGCCAGC  
TGCCCGCCAAGGAGTGCCCCGACCAGCTGTGCCGTTACAGCTTCAACTC  
CCATCGCTTTGCTGACCTTCTGTCTTCCACCTTCAAATATAGGTACAAAG  
GCAAGATACCAATTACCTGCACAAGACCCTGGCCCATGTGCCTGAAATC  
ATAGAGAGAGATGGATCCATAGGAGCCTGGGCCAGTGAGGGGAACGAGTC  
AGCTAACAAATCATACCCATAGAGATGGGTCCCTTGGGTCCCAGGTGGA  
AGGAGAGCCCTCAGCCTTTCTCCTGCTCCATTGAAGACCCTACAAAACAG  
ACAAAGTTCAAAGGCATCAAGACGTACATTTTCGTACCGGGTGACGCCGAG  
CCATACGGGGCACCCAGTCTACCGGCGCTACAAACACTTTGACTGGCTGT  
ACAACCGCCTGCTGCACAAGTTCACTGTGATCTCCGTGCCTCACCTGCC  
GAGAAGCAGGCCACGGGGCGATTTCGAGGAAGACTTCATCGAGAAGCGCAA  
GAGGCGACTGATACTGTGGATGAACCACATGACCAGCCACCCGGTCTCT  
CCCAGTACGAAGGCTTCGAGCACTTCTGTGATGTGCGCCGACGACAAGCAG  
TGGAACCTGGGCAAGAGACGGGCGGAGAAGGACGAAATGGTTGGCGCCCA  
TTTCATGCTGACTCTGCAGATCCCCAACGAGCACCACCAAGACCTTCAGGACG  
TGGAGGAGCGTATCGACTCCTTCAAGTCCTTCGCAAAGAAGATGGACGAC  
AGCGTGATGCAGCTGACACACGTGGCCTCGGAGCTGGTTCGTAAGCACTT  
GGGTGGCTTCAGGAAGGATTTTCAGCGACTGGGAAACGCCTTTCAGTCCA  
TCAGCCAGGCATTCATGCTGGACCCCCGCACTGCTCAGAGGCCCTCAAC  
ANNNNNNNNNNNNNNN-----



-----TTTCTAGAGAGAAAACCTTCATCCATCTAACTGCCTAGG  
CATGCTGTTGCTGTCTGATGCACACCAGTGTACCAAGCTATCAGAGCTCT  
CCTGGGGCATGTGTCTCAGCAACTTTCCGGCTATTTGCAAGACAGAAGAC  
TTCTCCAGCTGCCCAAAGACATGGTGGTGCAGCTTCTATCCCACGAGGA  
GCTGGAGACAGAAGATGAGAGACTGGTTTATGAAGCTGCCCTTAACTGGG  
TCAACTATGACTTGGAAAGGAGGCACTGCCATCTGCCAGAGCTGCTGAGA  
ACGGTTCGCCTGGCCCTGCTACCTGCCATCTTCCCTCATGGAGAATGTCTC  
TACAGAAGAGCTGATCAATGCCAGGCCAAGAGCAAGGAGCTCGTGGATG  
AGGCCATCCGGTGAAGCTAAAGATCTTGCAGAATGACGGTGTGGTTAAC  
AGCCCCGTGTGCTCGGCCGAGAAAAACCAGCCATGCCCTTTTTCTGTTGGG  
AGGTCAGACCTTCATGTGTGACAAGCTGTATCTGGTGGACCAGAAGGCAA  
AAGAGATCATCCCCAAGGCTGATATCCCCAGTCTTAGGAAGGAGTTCAGT  
GCCTGCGCCATCGGCTGTAAGGTCTACATCACAGGTGGCA--GAGGCTC-  
AGAAAAATGGTGTGTCTAAAGATGTATGGGTCTATGACACCGTCCATGAGG  
AATGGTCCAAGGCAGCACCCATGCTCATTGCCAGATTTGGTTCATGGCTCT  
GCTGAGCTGAAACACTGCCTTTATGTAGTAGGAGGTCACACGGCAGCAAC  
TGGCTGCCTCCCAGCCTCTCCCTCCGGATGAATATATTGTAGTGTTCAGC  
CGTTCAACAACAAGGCTGATTCTGAACGAAGCGGAGCTAATCATGACGCT  
GGCCAGGAATTTTCAGATGAGAGTGGTTACGGTCTCCCTGGAGGAACAAA  
CTTTCCCCAGCATCGCCAGGTGATCAGTGGGGCTCCATGTTAGTCAGC  
ATGCATGGAGCTCAGCTTGTACCTCACTCTTCCCTCCCCAGAGGAGCTGC  
TGTGGTAGAGCTGTTCCCTATGCTGTCAACCCAGAACAGTACACCCCAT  
ATAAAACCTCGCTCCTTACCAGGCATGGATCTTCAATATGTTTCCTGG  
AGGAACACTATAGAGGAGAACACTGTCACCCACCCAGACAGACCTTGGGA  
AGAAGGAGGCATCTCCATTTGGAAAAGGACGAGCAAGAGCGAATACTGG  
CCAGCAGGGATGTGCCCAGACACCTGTGCTGCCGCAACCCAGAGTGGCTC  
TTTCGAATCTACCAGGACACTTTGGTGGACATCCCTTTCATTCCCTGGAGGT  
CCTCAA---AGAGGGCCTGAAG---ACCAGGCCAGCTTGAAGAA---GG  
CCAAGCTGGCCAGCACGGTTCATCCAGGCCGGGTCAGAGAACCCCAAGTGC  
CACACCTCAGTCCAAGCCACCAACGAGGCTAAACTCACGGTTCCTGGCA  
GATCCCATGGAATCTGAAATACCTGAAGGTGAGAGAAGTGAAGTACGAGG  
TGTGGATCCAGAAGAAGGATAACAGCAAGGGGACACTGGAGGATCAAATC  
ATCCAGGCAAACCCCGCGCTGGAGGCTTTTGGTAACGCCAAAACAGTGAG  
GAATGACAACCTCATCCCGTTTTGGAAAATTCATCCGAATTCATTTGCGAA  
CCAGTGGCAAGTTGTCTCTGCTGATATTGAAACTTACTTATTGGAGAAG  
TCACGTGTCACCTTTCAGCTCAAGGCTGAGAGGAACTACCATATCTTCTT  
CCAGATATTGTCCAATCAGAAGCCAGAGCTGTTGGACATGCTGTTGATCA  
CTAACAACCCATATGACTACTCCTACATCTCCCAAGGAGAGGTAACAGTA  
GCATCCATCAACGACTCAGAGGAGCTGATGGCCACTGACAGCGCCTTTGA  
TGTGCTTGGCTTTACTCAAGAGGAGAAGATGGGAGTATATAAGCTGATTG  
GTGCCATTATGCACTATGGCAACATGAAGTTTAAGCAGAAGCAGCGTGAG  
GAGCAGGSTGAGCCTGACGGAACAGAGGCTGCTGATAAGTCAGCTTACCT  
TATGGGGCTGAACTCTGCAGACCTCATCAAAGGGCTATGCCATCCCAGAG  
TCAAGGTAGGAAATGAATATGTCACCAAAGGCCANNNNNNNNNNNNNNNNNNNNNCCAAACAAGGAGGC  
CT

TCAAGTGCAGGAGTGTGGCAAGCACTACAACACCAAGCTGGGATACAAA  
CGCCATGTGGCCATGCACTCTGCCACAGCAGGGGACCTCACCTGTAAAGT  
GTGCATGCAGAGCTATGAGAGCACGCCGGTGTCTCTGGAGCACCTTAAGA  
GCCACTCGGGGAAGTCCCTCGGGTGGCGCAAGGAGAAAAAACCCCATGC  
GACCACTGCGACCGCGTCTTCTACACACGGAAGGATGTGAGACGGCACAT  
GGTGGTCCACACGGGCCGAAAAGACTTCCTGTGCCAGTACTGTGCCCAGC  
GCTTTGGCAGGAAGGACCACCTGACACGCCACGTAAAGAAGAGCCACTCG

CAGGAGCTGCTGAAGATCAAGACGGAGCCTCCAGATATGTTAGGTCTTTT  
AGGTTCGGCTCGCCGCCATGCTCTGTCAAGGAGGAGCTTAGCCCTATGA  
TGTGCAGCATGGGTCCCAACAAAGACCCCATGATGGGCAAACCCCTCCCC  
AGCGGGACCCCTTCCCATGGGCATGTACAACCCACCAC-----CT  
CCAGGCCATGTCCAATTCTGGGGTGGGTACCC-----CACCCCTCC  
TGATGTCTAGCTCCCTGTCTGCAGCTATGGGCATGGGCTGTCACATGGAA  
TATCTCATTTATGCCCTTTTCTCATTCATGGGATGTTTACAAATCAGTGA  
TGGCTCAAACATTGTGAACTTGCTGGCTAGTAACTCTCCGAGCGTTTCGT  
ATGCTCTGACCCAGCAGAAATACTTCAGTAACTACAGTCCCGTGATTGGA  
TTTTACATTTACGAGCCATTGAGTACTGGAACCCACAGTGCAGGAGCA  
CCTGAAGACACTGAGTCATGGCTTCAACAAGATATCCTGGATGGACAACT  
TCTTCCACTACCTGCGGGTGGTGAACGTAAGCGGTCAACCAAGAATGAC  
TTTTATCAGCATCCTCAAGGGCTCTTTCCTGCGCAGCCCGGAGTACCAGCA  
CTTCACTGAGGACATCATCTTCTCCAAGA---ACCGTGAGAGTG-----  
ATGAGTATGACATTATTGCCTCACGCATGTACCTAGTGGCGCGGACCACA  
GAGAAGAAGCGCGAGGAGGTGGTGGAGCTTCTGGAGAAACTGCGTCCACT  
GATGCTGATCAATAGCATCAAGTTCATCGCCTTCAACCCACCTTTGTTT  
TCATGGACCGCTACAGTCTCTCAGTCATCTCGCCATCCTGACCTCAGGC  
TTCAGCGTGTTACCATCCTCATCCTCACTTTCTTTCTGGTCATCAACCC  
CTTGGGGAACCTTCTGGCTCATCCTCACAGTTACTTCTGTGGAGCTGGGTG  
TCTTGGGTTTAAATGGGCTATCATCTATTGAATGGCAGCCGGCCCTCAAG  
AATGTGTCTGCATCCTGTCTATGTGGCATTATTAATGGGCTCTCAGGATT  
GGCTGCCCTTGGTGGATGACATCCCAGCTGACACCATTACTCGACGGTTTC  
GCTACGACGTGGCCCTGGTATCAGCCTTAAAGGATCTGGAGGAGCACATC  
ATGGAGGGACTGAAAGAGTGTGGGCTGGAAGACAGTGCTTGCACCTCAGG  
CTTCAGTGTTCTGATCAAGGAATCTTGTGACGGCATGGGAGATGTCAGCG  
AAAAGCACGGGGGAGGGCCAGTGGTCCCCGAGAAGGCTGTACGCTTCTCT  
ATTACTGTTATGTCTGTCTCTGTCTTGGCAGATGGAGAGGAA-----  
-----GAGGCAGTTACCATCTTTACCGAGCCAA  
AGCCCAACTCAGAAGTGTCTGTAAAGCCCCTAAGCCTGATGTTTGTGGAT  
GAGTCAGACCATGAGACACTCACTGCTGTCTGGGACCTTTAGTTGCAGA  
GCGTAATGCAATGAAGCAGAGTCAACTCATCCTTCTATGGGTGGCCTCC  
CTCGTCTTCCGCTTCCACTTCAGAGCCACAGGATATGATGAGAAGATG  
GTGCGTGACATGGAGGGCCTGGAGCCTCAGGCTCCACCTATATCTGCAC  
TCTGTGTGATTCCAGTCGAGCAGAAGCCTCTCACAACATGATCCTACTACT  
CCATCACCCGCAACCACGGTGAGAACCCTGGAGCGTTATGAAATATGGAGG  
ACCAACCCCTTTTCTGAGTCTGTTGAGGAGCTGCGAGACCGGGTCAAAGG  
GGTCTCTGCCAAGCCCTTTATGGAGACCCAGCCACTATTGATGCATTAC  
ACTGCGACATTGGTAATGCAACAGAGTTCTACAAAATCTTCCAGGATGAG  
ATTGGGGARGTGTACCAGAAGGC---CAAC---CCCACCCGGGAGGAGCG  
GCGGAGATGGCGAGCAGCTCTAGACAAGCACCTGAGGAAGAAGATGAAGC  
TTAAACCAGTGATGAGGATGAATGGGAACTATGCCCGGAGGCTAATGACC  
CAAGAGGCTGTGAAGGTGGTGTGTGAGCTGGTACCCTCAGAAGAGAGGCG  
AGAGGCCCTGAGGGAGCTCATGGGGCTCTACGTCCAGATGAAGCCTGTGT  
GGCGCGCTACCTGCCAGCCAAGGAATGCCCTGACGAGCTGTGCCGCTAC  
AGCTTTAACTCCCAGAACTTTGCCAATCTCCTCTCCACTACCTTCAAATA  
TAGGTACAATGGAAAAGATCACCAATTATCTGCATAAGACCCTCGCCCATG  
TCCCCGAAATCATTGAAAGAGATGGCTCTATAGGAGCCTGGGCCAGCGAG  
GAAAACGAGTCAGCAAACAAATCGTACACCATTGAGATGGCTCCAAAGGG  
GCCCCAATGGAAGGAGAGTCTCAGCCTTTCTCCTGCTCCATTGAAGACC  
CCACAAAACAGACCAAGTTCAAAGGCATCAAGACCTACATTTTCGTACCGG  
GTCACACCGAGCCACACAGGGCGTCCCGTCTACAGACGCTACAAACACTT  
TGACTGGCTGTACAACCGCTTGCTGCACAAGTTCCTGTGATCTCGGTGC

CCCACCTGCCTGAGAAGCAGGCCACGGGGCGCTTCGAGGAGGACTTCATC  
GAGAAGCGTAAAAGACGACTGATTCTGTGGATGAACCACATGACCAGTCA  
CCCAGTCCTCTCCAGTACGAGGGATTTGAGCACTTCCTTATGTGTGCTG  
ACGACAAGCAGTGGAAGCTGGGTAAGAGGCGGGCGGAGAAGGACGAGATG  
GTGGGCGCCACTTCATGCTGACCTTCCAGATTCTAACGAGCATCAGGA  
TCTCCAGGATGTGGAGGAGCGGGTTGACTCCTTCAAGTCCTTTGCTAAGA  
AAATGGACGACAGCGTCATGCAGCTCACACATGTTGCCTCGGAGCTGGTG  
CGTAAGCACCTGGGTGGATTAGGAAGGAGTTCCAGCGGCTAGGAAATGC  
CTTCCAGTCCATCAGCCAGGCGTTCATGCTGGAACCTCCGCACAGCTCTG  
ATGCCCTCAACAACGCCATCTCCCACCTCTCTCGCACGTTCTCAAACCTG  
ACCTCCCTGGGTTTCATCATTGGAGTCGGTGTGGTTCGGGAACCTCCTGAT  
CTCCATCCTGCTGGTCAAAGACAAGAGCCTGCACCGCGCACCTACTACT  
TCCTGCTAGACCTGTGCGCCTCCGACATCCTGCGCTCTGCCATCTGCTTC  
CCCTTCGTCTTACCTCTGTCAAGAATGGATCCGCCTGGACCTATGGCAC  
GCTCACCTGCAAAGTGATCGCCTTCCCTCGGCGTGCTCTCCTGTTCCACA  
CAGCGTTCATGCTATTCTGTGTGTCAGTGTCACTCGCTACTTGGCTATTGCA  
CATCACCGCTTCTACACCAAGAGGCTGACCTTCTGGACCTGTCTAGCTGT  
CATCTGCATGGTGTGGACGTTGTGTCAGTAGCCATGGCTTTTTCCCCGGTGC  
TGGACGTAGGGACGTACTCCTTTCATCCGGGAGGAGGACCAGTGCACATTC  
CAGCACCGTTCCTTTCAGGGCCAATGACTCACTAGGCTTCATGCTCCTGCT  
GGCACTCATCCTCCTGGCCACACAGCTGGTTTACCTCAAGCTCATCTTCT  
TTGTCCACGACCGTCGGAAGATGAAGCCCGTCCAGTTCGTGCCTGCCGTC  
AGCCAGAACTGGACCTTCCATGGGCCAGGCGCCAGTGGGCAGGCGGCGGC  
TAACTGGCTCGCTGGATTTGGGAGAGGCCCCACCCCGCCTACCTTGCTGG  
GCATCCGGCAGAACAGCAACGCGGCGGGCCGAGGCGTCTGCTGGTGTGCTG  
GATGAGTTCAAACAGAGAAGAGGATTAGTAGGATGTTCTACATCATGAC  
GTTTTTCTTCTGCGTGTGGGGGCCCTATCTGGTAGCCTGCTACTGGC  
GGGTGTTTGAAGGGGCCCGTAGTCCCGGGGGCTACCTGACGGCAGCC  
GTGTGGATGAGCTTTGCCAGGCTGGGGTCAATCCATTCATCTGCATCTT  
CTCTAACAGGGAGGCCAAATCTCGCTTTCACCTGGCGTGGGGACTGGTC  
CTGGCACGGAGC---GCAGCGTCCCACTCGGCAACAGCTTGCTATCCCCG  
CAGCAAACCGAGGAGCCCACTGTTGCCACCCCCCGCAGCGATGGTTTGT  
CACCC---CTGCCAACAACCGACTGGACTTTGCTGCCTCGGCATACGACG  
CGGC-----GATTCGCCGGTAACGCGGCCACCTTGCTGTCCTAC  
GCAGCGCCGGAGTGAAGGCTC-----TTCCTCTGCCGGCTGCAGGCTG  
CTCCAACCGGCCTCTTGGCTATTACGCAGACCCGTCGG---GCTGG---G  
GCGGACGCACGCCCGCAGTACTGTAGCGTAAACAGCAAACCAAGCTCG  
GTCCTTTCCTGCTGGCCCTCTAACTCTGTGCGCGGCAGAGCAGGCG---C  
C---AACTATCTGG-----CCGAGGA---CGGA---GACGC---CA  
TCCCCGACGGAGAGATCCCCG---AT---CGGTGGCTCCGAGGAG---ACG  
AAACCCAAGGACCT-----GTCGGA---GTCGAGCTGGATAGAG---AC  
GCCGTCTCCATTAAGTCAATTGATTCAAGCGATTCTGGTATCTTTCG---  
AACAGGCCAAAAGGAGAAGAATCTCGCCCTCTGCCACGCCG-----  
GTTTCAGAAACTGTGTCCCGTTAAAATCTNNNCATCACTCAACAGGCGAAGT  
CACAGAGAGAGAAGTGGCGTTGGGGATAAATCCGTTTCGCGGACGGGATGG  
GCGCCTTCAAATCAACCACAGCTCCACGATATTGGCTCCGG---ACAG  
ACGGCGTTTTCTCCAGGCG---CCCGGCTAC---GCAGCGGCCGCCCT  
GGGA---CATCATCA-----CCACCCGACCCACGTTGGCTCT---TACT  
CCACGGCGGCTTTCAACTCCACCCGGGACTTTCTCTTTAGAAATCGGGGT  
TTCGGAGACGCCACCGG-----GGCGCAGCACAGTTTGTTCGC  
CTC-----CGGAAGTTT---C-----GCAGGGCCACATGGACACT  
CAGATGCCGCGGGACACCTGCTCTTCCAGGACTCCACGAG---CAAGCA  
GCGAGCCATGCGTCTTCTAATGTGGTCAACAGCCAGATGCGATTGGGCTT

CTCGGGGGACATGTATGGTCGGGCCGACCAGTATGGCCACGTTACAAGCC  
CAAGGT---CCGACCCTATGCTTCGACCCAGTTGCACGGCTATGGCCCC  
ATGAACATGAATATGGCCGCA---CACCACGGAGCAGGGGCCTTCTTTTCG  
ATACATGAGGCAGCCGATCAAACAAGAGCTCATCTGCAAGTGGATCGAGC  
CGGAGCAACTGACGAATCCCAAAAAGTCGTGCAACAAAACCTTTTAGTACG  
ATGCATGAGCTGGTGACCCATCTGACGGTGGAGCATGTGGGGGGACCAGA  
GCAGTCCAACCACATCTGCTTCTGGGAAGACTGCGCCAGAGAAGGGAAAC  
CATTCAAAGCCAAATACAAACTTGTAATCATATCAGAGTACACACCGGA  
GAGAAACCCTTTCCGTGTCCGTTTCCCGGCTGTGGCAA

>*Gigantactis vanhoeffeni*

AGCCTATTAATCCGCGCCGAGCTCAGCCAACCAGGCGCCCTCTTGGGTGA  
CGACCAGATTTATAATGTGATTGTCACAGCCCATGCCTTTGTAATAATCT  
TCTTTATGGTAATACCCATTATGATTGGGGGATTTGGGAATTGATTAATC  
CCCCAATAATCGGTGCCCTGATATGGCCTTTCCCGCATGAATAATAT  
AAGCTTCTGACTACTCCCCCCTCTTTCCTCCTCCTCCTCGCCTCATCGG  
GGGTAGAGGCCGGGGCGGGCACTGGGTGAACAGTTTACCCGCCTCTGTCTG  
GGCAATTTAGCTCATGCTGGGGCCTCTGTAGATCTAACAATCTTCTCCCT  
TCACCTAGCAGGGGTGTCTCAATTTTAGGGGCCATCAACTTCATTACAA  
CTATTATTAATATAAAAACCCCTGCCACCTCTCAATACCAAACGCCACTA  
TTCGTATGATCAGTCCATAACACAGCAGTCCCTTCTACTCTCTCTGCC  
TGTCCTTGCTGCCGGTATTACCATACTTTTAACTGACCGCAACCTAAACA  
CAACCTTCTTTGACCCCGCAGGGGGGGCGACCCCGTCTCTACCAGCA-

-----  
-----  
-----  
-----

-----TTCCTGGAGAGGAACCTTACCCGTCTAACTGCCTCGG  
CATGCTGTTGCTGTCTGACGCACACCAGTGCACCAAGCTGTCTGGAGCTCT  
CCTGGGGCATGTGCCCTCAGCAACTTCCCGCCATTTGCAAGACAGAGGAC  
TTTCTCCAACCTGCCAAAAGATATGGTGGTGCAGCTCTTGTACACGAGGA  
GTTAGAGACCGAAGACGAGAGACTTGTATGACGCCGCCCTCAATTGGA  
TCAACTATGACCTGGAGAAGAGGCACCTGCCACCTTCCAGAGCTTTTGAGA  
ACGGTCCGCCTGGCCCTGCTGCCTGCCATCTTCTCATGGAGAATGTCTC  
CACAGAAGAGCTGATCAACGCCAAGCCAAGCAAGGAGCTGGTGGACG  
AGGCGATCCGCTGCAAGCTGAAGATCTTGCAGAACGACGGCGTCTAAAC  
AGCCCGTGTGCTCGACCAAGAAAAACAGCCACGCCCTTTTCTCCTGGG  
CGGTCAGACGTTTATGTGTGACAAGCTGTATCTGGTGGACCAGAAAGCCA  
AAGAGATCATCCCCAAGCCGACATTTCCAGCCCCAGGAAGGAGTTCAGC  
GCCTGTGCCATCGGCTGCAAGGTGTACATCACTGGAGGGA--GGGGCTC-  
AGAGAACGGCGTGTCCAAGACGTGTGGGTCTACGACACGGTCCACGAGG  
AATGGTCCAAGGCGGCGCCCATGCTCATCGCCAGGTTCCGGCCACGGCTCC  
GCAGAGCTCAAACACTGCCTCTACGTGGTGGGAGGTCACACCGCGGCCAC  
CGGCTGCCCTCCCGCCTCTCCGTCCGGTGAATACATTTGTTGTGTTTCAGT  
CGTTCAACAACCAGACTGGTRCTGAATGAAGCGGAGCTRATCATGGCACT  
GGCTCAGGAGTTCCAGATGAGAGTGGTACAGTATCCCTGGAGGAGCAGT  
CRTTCCCTAGTATCATCCAGGTGATCAGCAGCGCTACCATGTTAGTTCAGT  
ATGCATGGAGCTCAACTCATCACCTCACTCTTCCCTCCCCAGAGGAGCTGT  
CGTGGTGGAGCTGTTCCCTTTGTCAGTGAACCCAGAGCAGTACACCCCGT  
ATAAAAACCTYGCCTCCCTTCCGGGCATGGACCTTCATTATATCTCCTGG  
AGGAACACTAAGGAGGATAACACCATCACCCACCCAGACAGGCCCTGGGA  
ACAAGGGGGTATTGCTCACTTGGATAAGGAGGAGCAAGAACGAATACTAA  
TGAGTAAAGACGTGCCAGGCATCTGTGCTGCCGGAACCCAGAGTGGCTC  
TTCAGGATCTATCAGGACACATTGGTGGACATTCCTTCCTTCCCTGGAAGT

CATCAA---AGAGGACATGAAG---ACAAAGCCCAACTTGAAGAA---GT  
CAAAGCCGGCCAGCACACTCCACCCGGGCGGGTCAGAGAACCTCTGTGT  
CAGACCTCAGTTCAAACCAGTAATGAGGCTAAACTCACAGTCTCCTGGCA  
GATACCGTGAATCTGAAGTATCTGAAGGTCAGAGAGGTGAAGTACGAGG  
TG-----AAAAGAGACACCAGCAAGGGGACCCTGGAGGATCAAATC  
ATCCAAGCAAACCCGGCGTTGGAGGCCTTTGGCAACGCCAAAACAGTGAG  
GAATGACAACCTCATCCCCTTTGGAAAGTTCATCCGAATCCACTTTGGTA  
CAAGCGGCAAGCTGTGCTGTCGCGACATCGAAACGTACCTGCTGGAGAAG  
TCCCGTGTTACCTTCCAGCTCAAGGCTGAGAGAACTATCACATCTTCTA  
CCAGATCCTGTCCAACCAGAAACCAGAGCTGCTGGACATGCTGCTGATCA  
CCAACAATCCCTACGACTACTCCTACATCTCCCAAGGAGAGGTAACCGTC  
GCCTCCATCAACGACTCAGAGGAGCTGATGGCCACGGACAGCGCCTTCGA  
TGTGCTCGGCTTCACTCCCGATGAGAAGGTGGGCGTCTATAAACTCACAG  
GTGCCATCATGCACTATGGCAACATGAAGTTCAAACAGAGGCAGCGCGAG  
GAGCAGGCGGAGCCCGATGGGACGGAGGCCGCTGATAAGTCAGCTTACCT  
AATGGGGCTGAACTCTGCTGACCTCATCAAGGGGCTGTGTCATCCCCGAG  
TCAAGGTGGGGAATGAGTATGTCACCAAAGGTCAAAGTGTGGATCAAGTC  
TACTATCCCAACAAGGAGGCCCTTCAAATGTGACGAGTGTGGGAAGCATA  
CAACACCAAGCTGGGATACAAGCGCCATGTTGCCATGCATTCAGCCACGG  
CGGGGATCTCACCTGTAAAGTGTGCATGCAGACCTACGACAGCACACCC  
ATGCTCCTGGAGCACCTGAAGAGCCACTCTGGGAAGTCCTCAAGTGGCAC  
CAAGGAGAAGAAACACCAGTGCACCATTGTGACCGGCGTTTTCTACACGA  
GGAAGGATGTGAGACGCCACATGGTGGTCCACACGGGCCGAAAGGACTTC  
CTCTGCCAGTACTGTGCCAGCGCTTCGGCAGGAAGACCATCTGACACG  
CCATGTGAAGAAGAGCCACTCACAGGAGCTGCTGAAAATCAAGACAGAGC  
CCCCGATATGTTAGGTCTTCTAGCTTCTGGGTACCACCCTGTTCTGTG  
AAGGAGGAGCTCAGCCCATGATGTGCGGTATGGGTCCCAACAAAGACCC  
CATGATGAGCAAACCCTTTCCAGTGGGGCCCTTTTCCAATGGGCATGT  
ACAACCCTCATCAC-----CTCCAGGCCATGTCGAATTCGGGGTAGGT  
CACTCC-----CACCCATCCCTGATGCCAGTTCTTTGTCTGCAGCTAT  
GGGCATGGGCTGTACATGGAGTACCTCATCTACGCCTCTTCTCATTCA  
TGGGATGTTTACAATCAGCGATGGATCAAATATCGTGAACCTGCTGGCA  
AGTAACTCTCCAAGTGTTCATATGCTCTGACACAGCAAAATACTTTAG  
TAACTATAGTCCAGTCATTGGGTTTTACATTTATGAGCCTATCGAGTACT  
GGAATCCACAGTGCAGGAGCACCTGAAGACTCTGAGTCATGGCTTCAAC  
AAGATCTCCTGGATGGACAACTTTTTCACTACCTGCGGGTGGTGAATGT  
GAGGCATCAACCAAGAGCGACTTCATCTCCATCCTCAAGGGCTCCTTCC  
TGCGCAGCCCGGAGTACCAGCACTTCACTGAGGACATCATTTTCTCAAAG  
A---ACCGTGAGACCG-----ATGAGTACGACATCATCGCCTCGCGGAT  
GTACTTGGTGGCACGGACTACAGAGAAGAAGCGTGAAGAAGTGGTGGAGC  
TCCTGGAAAACTCCGTCCACTGATGCTGATCAACAGCATCAAGTTCATC  
GCCTTCAATCCTACGTTTGTGTTTTCATGGACCGCTACAGCTCCTCCGTCA  
CTCACCATCCTGACGTCAGGATTCAGCGTACTACAATCCTCATCCTCA  
CTTTCTCCTGGTCATCAACCCCTTGGGTAACCTTCTGGTCTATCCTCACT  
CTAACGTCTATGGAGCTGGGCGTTTTGGGTTTTGATGNNNNNNNNNNNNNNN  
NNNNNNNNNNNNNNNNNNCTTCCAATGTTGGC  
ATTATTAATGGTCTCTCTGGATGGGATTCCTCAGTGGATGACTCCCCAGC  
TGACACCATCACTCGACGTTTTCGCTATGATGTGGCACTGGTAGCAGCAT  
TAAAGGATCTTGAGGAGGACATCATGGAAGGACTGAGAGAGAAGGGAATG  
GAGGACAATGCTTGTA-----ACTTCACTGCCATGATCAAAGAAATCCTG  
TGATGGCATGGGCGACGTGAGGAGGACATGGTGGAGGACCAGCTATCC  
CTGAGAAGGTTGTGCGTTTTCTTTCCTTCACTGTTATGTCGGTGTCTTTCCTC  
GCAGACAGTCAGCAG-----GAAGA





-----  
-----  
-----  
-----  
-----  
-----  
-----  
-----  
-----  
-----  
-----  
-----  
-----  
-----  
-----  
-----  
-----  
-----  
-----  
-----  
-----  
-----  
-----  
-----  
-----  
-----  
-----  
-----  
-----  
-----  
-----  
-----  
-----  
-----  
-----  
-----  
-----  
-----  
-----  
-----  
-----  
-----  
-----  
-----  
-----

>Gigantura indica  
AGCCTGCTTATCCGAGCGGAAGCTCAGCCAACCCGGCGCCCCTTTTAGGCGA  
TGACCAGATCTACAACGTTATCGTTACCGCCCACGCCTTCGTAATGATTT  
TCTTTATGGTAATGCCATCATGATTGGCGGGTTCGGGAAGTACTTATC  
CCCCTTATAATCGGAGCCCCGACATGGCATTTCGCCGAATGAACAACAT  
GAGCTTCTGGCTCTTACCTCCCTCTTTCCTGCTGCTCCTGGCCTCCTCTG  
GAGTAGAAGCCGGGGCCGGAACGGGCTGAACCGTTACCCACCCCTCTCC  
GGCAACCTCGCGCATGCGGGTGCCTCCGTAGACCTAACCATTTTCTCCCT  
ACATCTGGCGGGTGTTTCTTCCATCCTCGGTGCTATCAACTTTATCACGA  
CAATCTTAACATGAAACCCCGCTATTACCCAATACCAGACCCCTTA  
TTCGCTGATCAGTCTTATCACAGCCGTCCTACTACTGCTCTCTCTACC  
AGTCCCTGCGGGCGGAATCACTATGCTCCTCACAGACCGAAACTTAAACA  
CAACCTTCTTCGACCCCGCAGGCGGGGGGACCCCATTTCTTTACCAACAC  
CTATTCTGGTTCCTCGGACACCCGGAGGTATAATCCTTATCCTCCCTGG  
ATTCCGCATGATCTCCACATTGTTGCCTACTACTCGGGGAAAAAGAAC  
CTTTCGGCTACATGGGCATGGTCTGGGCAATAATGGCCATCGGCCTTCTT  
GGCTTCATTGTCTGAGCCCATCACATGTTTACAGTAGGCATGGACGTAGA  
CACACGTGCTTATTCCTGGAGAGGAACCTGCACCCATCCAAGCTGCTTGG  
CATGCTGCTGCTGTCAGATGCCCACCAGTGCACCAAGCTGTCAGAGCTGT

CCTGGGGTATGTGTCTCAGCAACTTCCCTGCCATCTGCAAGACAGAGGAC  
TTCTCCAGCTTCCCAAAGACATGGTGGTGCAGCTTCTGTCCCACGAGGA  
GCTGGAGACGGAGGATGAGAGACTGGTTTACGAGGCTGCCCTTAACTGGG  
TCAACTACGACCTGGAGAGGAGACACTGCCACCTGCCGGAGCTGCTGAGG  
ACCGTGCGCCTGGCCTTGCTTCCC GCCATCTTCTCATGGAGAACGTCTC  
CACAGAGGAGCTGATCAATGCCAAGTAAAGAGCAAGGAGTTGGTGGACG  
AGGCCATCCGCTGCAAGCTGAAGATCCTGCAGAATGATGGTGTGGTCAAC  
AGTCTTGTGCCCCGCCAGGAAGACCAGCCATGCCCTCTTCTTGCTGGG  
AGGACAGACCTTTCATGTGTGACAAGCTGTACTTGGTGGACCAGAAGGCCA  
AGGAGATCATCCCCAAGGCGGACATCCCCAGCCCCAGGAAGGAGTTCAGC  
GCCTGTGCCATCGGCTGTAAGGTCTACGTCACGGGCGGGA--GAGGCTC-  
CGAGAACGGCGTGTCTAAAGATGTGTGGGTCTACGACACCGTCCATGAGG  
AGTGGTCTAAGGCAGCACCTATGCTCATTGCCAGGTTTGGCCACGGCTCT  
GCTGAGCTCAAACACTGTCTCTATGTGGTTCGAGGACACACAGCAGCCAC  
CGGCTGCCTCCCAGCCTCTCCGTCTAGATGAGTACATCGTAGTGTTCAGT  
CGTTCTACAACAAGGCTGATTCTAAACGAAGCAGAACTGATCCTGGCACT  
GGCCCAAGAGTTTCAGATGAGGGTGGTTACAGTGTCCCTAGAGGATCAGT  
CTTTCCCCAGCATCGTCCAGGTGATCAGCGGGGCTCCATGTTGGTTAGT  
ATGCACGGAGCTCAGCTCGTACCTCCCTCTTCCCTCCCTAGAGGAGCTGC  
TGTAAGTGGAGCTCTTCCCCTATGCTGTGAATCCAGAACAGTACACCCCGT  
ACAAAACCCTAGCCTCCCTACCAGGCATGGACCTTCAATACGTTTCCTGG  
AGGAACACCGTTGAGGAGAACACTGTCGCTCACCCGGACAGACCCCTGGGA  
CCAAGGAGGCATCGCCATTTGGAGAAAGAAGAGCAGGAGAGAATCCTAG  
CCAGCAAGGATGTCCCCAGGCACCTATGCTGCCGCAACCCAGAGTGGCTC  
TTCAGGATCTACCAGGACACTCTGGTGGACATCCCCCTCCTTCCCTGAAGT  
CCTCAA---GGAGGGCCTGAAG---ACGAGGCCAAACTTGAAAA---GT  
CCAAGCCTGCCAGCACAGTTCACCCGGGCCGGGTCAGAGAACCCCAAGTGC  
CAGACATCACTCCAAGCCACCAATGAG-CTAAGCTCACTGTATCCTGGCA  
GATCCCCTGGAACCTGAAGTACCTAAAGGTGCGAGAGGTGAAGTACGAGG  
TATGAATCCGGAAAAAGGATTCAAGCAAGGGAACCCCTGGAGGATCAGATT  
ATCCAGGCAAACCCCTGCCCTGGAGGCTTTTGGAAACGCCAAAACAGCGAG  
GAACGATAATTCTTCCCGTTTTGGTAAATTCATCAGAATTCACTTTGGAA  
CCAGTGGKAAACTGTCCCTCTGCGGACATTGAGACCTACCTGCTGGAGAAG  
TCACGGGTCACTTTTCAGCTTAAGGCAGAGAGAAATACCACATCTTCTA  
CCAGATCTTGTCCAATCAAAGCCAGAGCTGTTGGACATGCTGTTGATCA  
CCAACAACCCCTTATGACTACTCCTACATCTCCAAGGAGAAGTAACCGTA  
GCATCCATCAACGATTCAGAGGAGCTGATGGCCACTGACAGTGCCTTTGA  
TGTGCTTGGCTTCACTCAAGAGGAGAAGATGGGAGTCTACAAGTTGACAG  
GGGCCATTATGCACTATGGCAACATGAAGTTCAAGCAAAGCAGCGTGAG  
GAACAGGCTGAGCCTGATGGTACAGAAGCTGCTGATAAGTCAGCTTATCT  
CATGGGGTTGAATTCAGCAGACCTCATCAAAGGACTCTGCCATCCCAGAG  
TCAAAGTAGGAAATGAGTATGTCACCAAAGGCCAGGGTGTAGATCAGGTC  
TACTAC---ACAAGGAGGCCTTCAAGTGTGAGGAGTGC GGCAAGCACTA  
CAACACCAAGCTGGGGTACAAGCGCCACGTAGCCATGCACTCCGCCACGG  
CGGGGGACCTCACCTGCAAAGTGTGCATGCAGAGTTACAAAAGCACGCCG  
GCGCTCCTGGAGCACCTCAAGAGCCACTCGGGCAAGTCTCCTCGGGCGGCGC  
CAAGGAGAAGAAGCACCCGTGCGACCACTGCGACCGTTCGCTTCTACACGC  
GGAAGGACGTCAGGCGACACATGGTTCGTCACACGGGCGCAAAGGACTTC  
CTGTGCCAGTACTGTGCCAGCGCTTCGGCAGGAAGGACCATCTGACGCG  
GCACGTGAAAAAGAGCCACTCGCAGGAGCTGCTGAAGATCAAACGGAGC  
CTCCGGATATGTTGGGTCTCCTGGGCTCCAGCTCGCCGCCTTGCTCTGTC  
AAGGAGGAGCTCAGCCCCATGATGTGCAGCATGGGTCCCAATAAAGACCC  
CATGATGGGCAAACCCCTTCCCAGCGGGACCCCCCTTCCCATGGGCATGT

ACAACCCCCACCAC-----CTCCAGGCCATGTCTAATCCCGGGGTGGGC  
CACCCC-----CACCCCTCCCTGATGCCCGGTTCCCTGTCTGCAGCTAT  
GGGCATGGGCTGTACATGGAATACCTGATCTACGCCTCCTTCTCCTTCA  
TGGGATGTTTACAAATCAGCGACGGATCCAACGTTGTCAACCTGTTAGCC  
AGCAACTCCCCAGTGTATCGTACGCTCTGACCCAGCAGAAGTACTTCAG  
TAACTACAGCCCTGTAATCGGTTTCTACATCTACGAACCCATCGAGTACT  
GGAACTCCACAGTGCAGGAGCACCTGAGAACTCTGGGCCAAGGCTTTAAC  
AAGATCTCCTGGATGGACAATACTTCCACTACCTGAAGGTAGTGAACGT  
GACCGCCTCCACCAAGAGCGACTTCATCACCATCCTCAAAGGCTCCTTCC  
TGAAGAGCCCGGAGTACCAGCACTTCACTGAGGACATCATCTTCTCAAAG  
A---AAGGCG-----AGGAGTATGACATCATCGCATCCAGGAT  
GTACCTGGTAGCGCGGACTACGGAGAAGACCCGGGAGGAGGTGGTGGAGC  
TGCTGGAGAGGCTCCGCCCTTCTCCCTCATCAACAGCATCAAGTTCATC  
GTCTTCAACCCACCTTCGTCTTTCATGGACCGTTACAGCTCTTTCAGTCGT  
ATCACCATTCTCACCTCGGGCTTCAGTGTGCTCACCATCCTCATCCTCA  
CCTTCTTCCCTGGTTCATCAACCCCTGGGGAACCTTTTGGTTGATCCTGACG  
GTGACCTCTGTGGAGCTGGGTGTTCTGGGCCTGATGGGCTACCACACGTT  
CGAGTGGCAGCCGGCCCTCAAGAACGTGTCCCGTCCCTGCCATGTGGGTA  
TCATCAACGGGCTCTCCGGATGGGCTGCCTCGGTGGAGGACGCCCCCTCC  
GACACCATCACTCGTTCGGTTTTCGCTACGACGTGGCCCTGGTGTTCGGCCCT  
GAAGGACCTAGAGGAAGACATCATGGAAGGACTGGCGGAGCGTGGGCTGG  
AAGACAGCGCTTGCACCTCAGGCTTCAGAGTTATGATCAAGGAGTCTGC  
GATGGCATGGGAGATGTCAGCGAGAAGCACGGCGGAGGACCACCGACGCC  
TGAGAAGGCTGTGCGTTTCTCTATCACCGTCATGTCCGTCTCTGTCCAGG  
CCGACGGAGAGGAG-----GAGCCG  
GTCGTTCATCTTCAGGGAGCCCAAGCCCAACTCTGAACTGTCCTGTAAGCC  
CCTCTGCCTGATGTTTGTGGATGAGTCTGACCACGAGACACTCACCGCCG  
TTCTGGGGCCTTTGGTAGCGGAGAGGTATGCGATGACGCAGAGTCGACTC  
ATCCTTTTCATTGGGTGGCCTCCCCGCTCTTTCCGCTTCCACTTCAGAGG  
CACGGGCTACGACGAGAAGATGGTGCAGAGATGGAAGGTCTAGAGGCCT  
CAGGCTCCACCTATATCTGCACTCTTTGTGACTCCACTCGGGCAGAAGCC  
GCTCACAACATGGTGCTCCACTCTGTACCCCGCAGCCACGACGAGAACCT  
GGAGCGCTACGAGATATGGAGGACCAACCCCTTCTCGGAGTCGGCCGTGG  
AGCTGCGAGACCGGGTCAAAGGGGTCTCCGCCAAACATTTATGGAGACC  
CACCCGACTCTGGATGCATTACACTGTGACATAGGTAACGCCACTGAATT  
CTACAAAATCTTCCAGGATGAGATCGGGGAGGTGTTCAGGGGGC---CA  
AC---CCGAGCCGGGAGGAACGGCGCAGCTGGAGGGCAGCCCTTGATAAG  
CAGCTGAGGAAGAAAGTGAAGCTGAAACCTGTGATGCGGATGAATGGGAA  
CTATGCCCCAAGGTTGATGACCCAGGAGGCTGTGGAGGCGGTGTGTGAAC  
TGGTGGCCTCGGAAGAGAGGAGGGCAGCCCTGAGGGAGCTGATGGGGCTC  
TATATCCAGATGAAGCCTGTGTGGCGTGCCACCTGCCAGCCAAGGAGTG  
CCCTGACCAGCTGTGCCGCTACAGCTTTAACTCACAGCGCTTCGCTGATC  
TCCTCTCCTCCACGTTTAAATACAGGTATGATGGAAAGATCACCAACTAC  
CTGCACAAGACCCTGGCCACGTCCCTGAAATTATAGAAAGAGACGGTTC  
CATCGGAGCCTGGGCCAGCGAGGGGAACGAGTCTGCGAACAAG-----

-----  
-----  
-----  
-----  
-----  
-----  
-----  
-----  
-----

-----ACAGGCGAAGTCACAGAGAGAGAAGTGGCTTTGGGG  
ATCAATCCGTTTCGCAGACGGGATGGGCGCCTTCAAAAATAAACCACAGCTC  
TCATGACATTGGCTCCGG--GCAAACGGCGTTCCTCCCAGGCG--C  
CCGGCTAC--GCAGCGGCCGCCCTGGGA--CACCACCA-----CCAC  
CCGACCCACGTCAGTCT--TATTCCACGGCAGCTTTCAACTCCACCCG  
GGACTTTCCTTCCGAAATCGGGGCTTCGGAGACGCCACCAG-----  
----CGCGCAGCACAGTTTGTTTCGCCTCCGC--CGCGGAAGTTT---C  
-----GCAGGGCCACATGGACTCTGATGCCCGGGCCACCTGCTCTT  
CCCCGGGCTCCACGAG--CAAGCCGCGAGCCACGCGTCGTCCAACGTTG  
TAAACAGCCAGATGCGACTGGGCTTTTCTGGGGACATGTACGGGCGGGCC  
GACCAGTATGGCCACGTTACAAGCCCAAGGT--CCGACCACTATGCTTC  
GACCCAACCTTCATGGCTATGGCCCCATGAACATGAATATGGCCGCT---C  
ACCACGGAGCAGGGGCCTTCTTCCGCTACATGAGGCAGCCGATCAAACAA

GAGCTCATCTGCAAGTGGATTGAACCGGAGCAGCTGGCGAATCCCAAAAA  
GGCGTGCAACAAAACTTTTAGCACGATGCACGAGCTCGTGACCCACCTGA  
CGGTGGAGCATGTGGGGGACCGGAGCAGTCGAACCACATTTGCTTCTGG  
GAAGACTGTGCCCCGAGAAGGGAAACCATTCAAAGCCAAATACAAACTTGT  
AAATCATATCAGAGTTCACACCGGAGAAAAACCGTTCCTCGTCCGTTCC  
CCGGCT-----

>Glaucosoma hebraicum

AGCCTGCTAATTCGAGCAGAGCTCTGTCAGCCGGGCGCCCTCTTAGGGGA  
CGACCAAATCTATAACGTTCATCGTTACGGCACATGCCTTCGTAATAATTT  
TCTTTATAGTAATACCAATCATGATTGGAGGCTTCGGAAATTGACTGGTG  
CCTCTTATGATTGGTGCCCCGACATGGCTTTCCCCGAATAAACAACAT  
AAGTTTCTGACTTCTTCGCCCATCTTTCTTCTCCTTCTCGCCTCCTCGG  
GCGTAGAGGCTGGTGCTGGAACCGGATGAACTGTTTATCCCCCTCTGGCA  
GGAAACTTAGCTCATGCAGGGGCATCAGTCGACTTAACCATCTTTTCTCT  
CCATCTGGCAGGTATCTCCTCAATTCGGGTGCAATTAACCTTTATCACAA  
CAATTATTAATATGAAGCCCCCTGCCATCTCTCAGTATCAAACCTCCTCTG  
TTCGTATGGGCGGTACTGATTACTGCAGTACTTCTTCTTCTTTCTCTCCC  
AGTCCCTTGCCGCCGGCATTACAATGCTTCTCACGGACCGGAACCTAAACA  
CTACCTTCTTCGACCCATCCGGAGGAGGGGACCCCATTTCTTTACCAACAC  
CTCTTT-----

-----TTCCTGGAGAGAAACCTTCACCCATCTAACTGCCTTGG  
CATGCTGTTGCTGTCTGACGCCACCAGTGCACCAAGCTGTCCGAGCTCT  
CCTGGGGCATGTGCCCTCAGCAACTTCCAGCCATTTGCAAGACAGAGGAC  
TTCCCTCCAACCTGCCCAAAGATATGGTGGTGCAGCTTTTGTACATGAGGA  
GCTTGAGACAGAAGATGAGAGACTGGTTTATGAAGCCGCCCTTAACCTGGA  
TCAACTATGACCTGGAAAAAAGGCACCTGCCACCTTCCAGAGCTCCTGAGA  
ACGGTCCGCCTGGCCCTGCTGCCTGCCATCTTTCTCATGGAGAACGTTTC  
TACAGAAGAGCTGATCAATGCCAGGCCAAGAGCAAGGAGCTGGTGGATG  
AAGCTATCCGCTGTAAGCTGAAGATCCTGCAGAATGATGGCGTTGTTAAC  
AGTCCGTGTGCTCGACCAAGAAAAACCAGCCATGCCCTCTTTCTCCTGGG  
AGGGCAGACTTTCATGTGTGACAAGTTGTACCTGGTGGACCAGAAAGCCA  
AAGAGATCATCCCCAAAGCTGACATTCAGTCCCAGGAAGGAGTTCAGC  
GCCTGCGCAATCGGCTGCAAGGTGTACATCACTGGCGGGA--GAGGCTC-  
AGAGAACGGTGTGTCTAAAGATGTGTGGGTCTACGACACCGTCCACGAGG  
AATGGTGAAGGCGGCACCCATGCTCATTGCCAGGTTTGGCCACGGCTCC  
GCAGAGCTGAAACACTGCCTCTACGTGGTAGGAGGTCACACTGCAGCAAC  
TGGCTGCCTCCCGCCTCTCCGTCT-----

-----GCAAAAGACAGCAGCAAGGGGACGCTGGAGGATCAAATC  
ATCCAGGCGAACCCGGCGCTGGAGGCCTTCGGGAACGCCAAAACGCTGAG  
AAACGACAACCTCGTCTCGTTTTGGAAAATTCATCCGAATTCACCTCGGTA  
CGAGCGGGAAGCTGTCGTCTGCTGACGTCGAGACGTACCTGCTGGAGAAG  
TCACGTGTCACCTTTCAGCTGAAGGCTGAGAGGAACTACCACATCTTCTA  
CCAGATCCTGTCCAATCAGAAGCCGGAGCTCCTGGACATGCTGCTGATCA  
CCAACAACCCGTACGACTACTCCTACATCTCCCAGGGAGAGGTGACGGTC  
GCCTCCATCAACGACTCGGAGGAGCTGATGGCCACCGACAGCGCCTTCGA  
TGTGCTCGGCTTCACTCCAGACGAGAAGATGGGCGTCTACAAACTGACCG  
GCGCCATCATGCACTACGGAAACATGAAGTTCAAAACAGAAGCAGCGCGAG  
GAGCAGGCGGAGCCTGACGGGACGGAGGCGGCTGATAAGTCTGCTTACCT  
GATGGGTCTGAACTCTGCTGACCTGATTAAGGGGCTGTGCCATCCCAGAG  
TGAAGGTCGGAAACGAATACGTACCAAAGGCCAAAGCGTGGACCAAGTC  
TACTACCCCAACAAGGAGGCCTTCAAGTGTGAGGAGTGTGGGAAGCACTA  
CAACACCAAGCTGGGATATAAGCGCCACGTGGCCATGCACTCTGCCACAG  
CAGGGGATCTCACCTGTAAAGTGTGCATGCAGACCTACGAGAGCACACCT  
GTGCTCTTGGAGCACCTCAAGAGCCACTCTGGGAAGTCTTCGGGTGGCAC  
CAAGGAGAAAAAACCCCGTGTGACCCTGTGACCGTCTGTTTTCTACACAC  
GGAAGGATGTGAGACGACATATGGTGGTCCACACGGGCCGAAAGGACTTC  
CTGTGCCAATACTGTGCCAGCGCTTCGGCAGGAAGGACCATCTGACACG  
TCATGTGAAGAAGAGCCACTCACAGGAGCTGCTGAAGATCAAGACAGAGC  
CTCCCGATATGTTAGGTCTTTTAGCGTCTGGGTACCACCCTGCTCTGTG  
AAGGAGGAGCTCAGCCCATGATGTGCGGCATGGGTCCCAACAAAGACCC  
CATGATGGGCAAACCGTTCGCCGGTGGGGCTCCTTTCGGATGAGCATGT  
ATAACCCCAACCAT-----CTCCAGGCCATGTCTAATTCTGGTGTGAGT  
CACCCG-----CACCCGTCCCTGATGCCAGTTCCTTGTCTGCAGCTAT  
GGGCATGGGTTGTCACATGGAATATCTCATCTACGCCTCTTCTCATTCA  
TGGGATGTTTTACAAATCAGTGATGGATCAAATATTGTGAATCTGCTGGCT  
AGTAACTCTCCGAGTGTTCGTACGCTCTGACCCAGCAGAAATACTTCAG  
TAACTACAGTCCGGTGATTGGGTTTTACATTTATGAGCCCATCGAGTACT  
GGAACTCAACGGTGCAGGAGCACCTGAAGACTCTGAGTCATGGCTTCAAC  
AAGATCTCTTGGATGGACAACCTTTTCCACTACCTGCGGGTGGTGAATGT  
GAGTGCCTCGACCAAGAGCGACTTCATCACCATCCTCAAGGGCTCCTTCC  
TGCGCAGCCAGAGTACCAGCACTCACAGAGGACATCATATTCTCCAAG  
A---ACCGCGAGACTG-----ATGAGTACGACATTATCGCCTCACGGAT  
GTACTTAGTGGCACGAACCACAGAGAAGAAGCGTGAAGAGGTGGTGGAGC  
TTCTGGAGAAGCTTCGTCCGTTGATGCTGATCAACAGCATCAAGTTCATT  
GCCTTCAATCCTACATTTGTGTTTCATGGACCCTACAGCTCCTCTGTCAT  
CTCGCCATCCTGACCTCAGGCTTCAGCGTACTACAATCCTCATCCTTA  
CTTTTTCTTGGTCATTAATCCCTTGGGGAACCTCTGGCTCATCCTCACT  
GTAACATCCGTGGAGCTGGGCGTCTTGGGTTTGATGGGCTTTCACCAGTT  
TGAATGGCAGCCAGCTCTCAGAAATGTGTCTACATCTTGCAATGTAGGCA  
TTATTAATGGGATCTCTGGATGGGCTTCCTCTGTGGATGACTCCCCGGCT  
GACACCATCACTCGGCGGTTTTCGCTATGATGTGGCACTGGTGTGAGCAAT  
AAAGGATCTGGAGGAGGACATCATAGAGGGGCTGAGAGAGAGTGGGATGG  
AAGACAGTACGTGCACCTCAGGCTTCAGTGTGATGATCAAAGAATCTTGT  
GATGGCATGGGCGATGTCAGCGAGAAGCACGGTGGAGGACCAGCTGTTCC  
TGAGAAGGCCGTACGTTTCTTTCACTATTATGTCAGTCTCTGTCTG  
CAGATGAGGAGGAG-----GAAGAG  
GTTACCATCTTACCAGCCAAAGCCAAACTCAGAACTGTCCTGTAAGCC  
CCTTTGCCTAACGTTTGTGGATGAGTCAGACCACGAGACACTTACTGCCG  
TCCTGGGGCCTATAGTTGCAGAGCGCAATGCAATGAAAGAGAGCAGACTC

ATCCTATCCGTGGGTGGACTACCTCGCTCCTTCCGCTTTCACCTCCGAGG  
CACCGGATACGATGAGAAGATGGTGCCTGAGATGGAGGGCCTCGAGGCCT  
CAGGGTCCTCCCATATCTGCACTCTTTGTGACTCCAGTCGGGCAGAGGCC  
TCTGAAAACATGGTGCTACACTCCGTCACCCGCAGCCACGAAGAGAACCT  
AGAACGTTACGAAATATGGAGAACCAACCCCTTTTCTGAGTCTGCAGATG  
AGCTGCGAGACAGAGTCAAAGGGGTGTCTGCCAAGCCTTTCATGGAGACC  
CATCCCACCCTAGATGCATTACACTGTGACATTGGCAATGCCACTGAGTT  
CTACAAAATCTTCCAGGATGAGATTGGGGAGGTATACAAAAGGT---CA  
AC---CCCAGCCGGGAGGAACGACGCAGCTGGAGGGCAGCCCTAGATAAA  
CAGCTGAGGAAGAAGATAAAGCTTAAACCGGTAATGAGGATGAATGGGAA  
CTATGCCCGCAGGCTAATGACCCAGGAGACTGTGGAGGTGGTGTGTGAGC  
TGGTGCCCTCAGAGGAGAGGAGGGAGGCCCTGAGGGAGCTTATGAGGCTC  
TACCTCCAGATGAAGCCTGTATGGCGTGCCACCTGCCAGCCAAGGAGTG  
CCCCGACCAGCTGTGCCGCTACAGCTTTAACTCCCAGCACTTTGCCGACC  
TCCTCTCCTCTGCCTTCAAATATAGGTACAACGGAAAGATAACCAATTAC  
CTGCACAAGACCCTGGCCCATGTGCCCTGAAATCATAGAGAGAGATGGATC  
CATAGGAGCCTGGGCCAGCGAGGGGAATGAGTCGGCAAACAAATCGTACA  
CCATCGACATGGGCCCTTGGGTCCCGGTGGAAGGAGAGCCACAGCCG  
TTCTCCTGCTCCATTGAAGACCCCAAAAACAGACAAAGTTCAAAGGCAT  
CAAGACGTATATTTTCGTACCGGGTCACGCCGAGCCACACAGGACGTCCTG  
TCTACAGGCGCTACAAACACTTTGACTGGCTGTACAACCGCTTACTGCAC  
AAGTTCACTGTGATCTCTGTGCCCCACCTGCCAGAGAAGCAGGCCACGGG  
CCGATTTGAGGAAGACTTCATCGAGAAGCGCAAGAGGCGACTGATACTGT  
GGATGAACCACATGACCAGTCAACCAGTCCTCTCCAGTATGAAGCCTTT  
GAGCACTTTCTGATGTGCGCTGATGACAAACAGTGGAACCTGGGCAAGAG  
ACGGGCAGAGAAGGACGAGATGGTGGGGGCCATTTTCATGCTGACCCTCC  
AGATCCCCAACGAGCACCAAGACCTTCAGGATGTGGAGGAACGAATCGAC  
TCCTTCAAGGCCTTTGCTAAGAAAATGGATGACAGCGTGATGCAGCTCAC  
ACATGTTGCCTCGGAGCTGGTGCGCAAGCACCTGGGAGGATTCAGGAAGG  
AGTTCCAACGGCTGGGAAATGCCTTCCAGTCTATCAGCCAGGCGTTTATG  
CTGGACCCTCCCCACTGCTCAGAAACCTTCAACAACGCCATCTCCCATNNNNNNNNNCG  
TTCTCAAACCTGACCTCTCTGGGTTTCATCATCGGAGTCGGTGTGGTTGG  
AAACCTCCTGATCTCCATCCTGCTGGTCAAAGACAAGAGCCTGCACCGAG  
CGCCCTACTATTTCTTGCTGGACCTGTGCGCCTCTGATATCCTGCGCTCC  
GCCATCTGCTTCCCCTTTGTCTTACCTCTGTCAAGAATGGATCTGCCTG  
GACCTATGGCACGCTGACCTGCAAAGTGATCGCCTTCCCTGGGTGTGCTGT  
CCTGTTCCACACGGCGTTTATGCTGTTCTGTGTGTCAGTGTACGCGCTAC  
CTGGCCATCGCACATCACCGTTTCTACACCAAGAGGCTGACCTTCTGGAC  
CTGTCTAGCTGTGATCTGCATGGTGTGGACGTTGTGAGTGGCTATGGCGT  
TCCCACCGGTGCTAGACGTAGGGACGTACTCTTTTATCCGGGAGGAGGAC  
CAGTGCACATTCAGCACCGTTCCCTTCAGGGCGAATGATTCTCTGGGCTT  
CATGCTCCTGCTGGCGCTCATCCTCCTGGCCACACAGCTGGTTTACCTCA  
AGCTCATCTTCTTCGTCACGACCGTCGAAAGATGAAGCCTGTCCAGTTC  
GTGCTGCTGTGTCAGCCAGAACTGGACCTTCCACGGGCCAGGCGCCAGCGG  
GCAGGCGGCGGCAACTGGCTGGCTGGATTTGGTTCGAGGCCCCACCCCGC  
CTACTTTGCTGGGCATACGGCAGAACAGCAACGCAGCAGGCCCGCCGGCGT  
CTTCTGGTATTGGATGAATTCAAAACAGAGAAGAGGATTAGTAGGATGTT  
CTACATCATGACGTTTTTCTTCCCTGGCTCTGTGGGGGCCCTATCTGGTGC  
CCTGCTACTGGCGGGTGTGTTGCAAGGGGCCCTGTGGTCCCTGGGGGCTAC  
CTGACGGCAGCCGTGTGGATGAGCTTTGCCAGGCTGGGGTCAATCCGTT  
CATCTGCATCTTCTCCAANNNNNNNGCCAAATCTCGCTTTCACCCCTGGCATGGGGAC  
TGGTCTGGCACGGAGC---GCAGCGTCCCCTCGGCAACAGCTTGCTAT  
CCCCGACGAAACCGAGGAGCCCACTGTTGCCACCCCCCGCAGCGATGG



TTTGTACCC---CTGCCAACAAACCGACTGGACTTTGCTGCCTCGGCATA  
CGACGCCGCC-----GATTTGCGCCGGTAACGCGGCCACCTGCTGT  
CCTACGCAGCGGCCGGAGTGAAGGCTC-----TCCCCTGCCGACTGCA  
GGCTGCTCCAACCGGCCTCTTGGCTATTACGCAGACCCGTCAG---GCTG  
G---GGAGGACGCACGCCGCGCAGTACTGTGGCGTAAATAGCAAATCCA  
GCTCGGTGTTTTCTGCTGGCCCGCTAACTCTATCGGTGGCAGAGCGGGC  
A---CC---AACTACCTGG-----CCGAGGA---GGGA---GACTC  
---CATCCCAGCGGAGAGGTCACCG---AT---CGGCGGCTCGGAGGAG-  
--ACCAAACCCAAAGACCTGAC---ATCAGA---GTCGAGCTGGATAGAG  
---ACGCCGTCTCCATTAAGTCCATCGATTGAGCGATTCTGGTATCTT  
TG---AACAGGCCAAAAGGAGAAGAATCTCACCTTCTGCCACGCCG----  
-----

GTTTCAGAGACAGTGTCCCCTTAAAATCGGAGNNNNNNNNNNNNNNNNNNNNNNNNNNNNNNNNNNNNNNNNNNNNNN  
NNNNNNNNNNNNNNNNNNNNNNNNNNNNNNNNNNNNNNNNNNNNNNNAACCACAGCTCC  
CACGATATCGGCTCCGG---ACAAACGGCGTTTTCTCTCAGGCG---CC  
CGGCTAC---GCAGCGGCCGCCCTGGGA---CACCACCA-----CCACC  
CGACCCACGTTGGCTCT---TACTCCACGGCGGCTTTCAACTCCACCAGG  
GACTTTCTCTTCAGAAATCGGGGTTTTGGGGACGCCACCGG-----  
---GGCGCAGCACAGTTTGTTCGCCCTC-----CGGAAGTTT---C-  
-----GCAGGGCCACATGGACACTCAGATGCAGCGGGGCACCTGCTCTTC  
CCGGGGCTCCACGAG---CAAGCGGCAGCCATGCGTCTTCCAACGTGGT  
CAACAGCCAGATGCGACTGGGCTTCTCGGGGGACATGTACGGACGGGCCG  
ACCAGTACGGCCACGTTACGAGCCCGCGCT---CCGACCACTATGCTTCG  
ACCCAGCTGCACGGCTACGGCCCCATGAACATGAATATGGCCGCA---CA  
CCACGGAGCAGGGCCCTTCTTTCGATACATGAGGCAGCCGATCAAACAAG  
AGCTCATCTGCAAGTGGATCGAGCCGAGCAGCTGACGAACCCCAAAAAG  
TCGTGCAACAAAACCTTTTAGCACGATGCACGAGCTGGTGACCCATCTGAC  
GGTGGAGCATGTGGGGGGACCAGGAGCAGACCAACCACATCTGCTTCTGGG  
AGGACTGCGCCAGAGAAGGGAAGCCATTCAAAGCCAAATACAAACTTGTA  
AATCATATCAGAGTACACACCGGAGAAAAGCCCTTCCCCTGTCGGNNNNNNNNNNNNNNNNNNNNNN

>*Gnathonemus petersii*

AGCCTACTCATCCGAGCGGAACCTAAACCAACCTGGAGCCCTACTTGGGGA  
TGACCAGATTTATAATGTTATCGTACACAGCACACGCCTTCGTAATAATTT  
TCTTCATGGTAATGCCATTATGATCGGCGGCTTCGGCAACTGATTAATC  
CCCCATCATGCTCGGCGCTCCTGACATAGCATTCCCTCGAATGAACAACAT  
AAGCTTCTGACTCCTGCCCCATCGTTCCTTCTTCTACTGGCCTCTTCTG  
GCGTAGAAGCTGGGGTTCGGTACGGGGTGAACCGTTTATCCACCGCTAGCC  
GGTAACCTTGCCCATGCTGGAGCCTCCGTAGACCTAGCCATTTTCTCACT  
TCACCTGGCCGGGGTCTCTTCCATCCTTGGTTCAATTAACTTTATTACCA  
CAATTATCAACATAAAACCCACAGCAATTTCCCAATACCAAACCCCATTG  
TTTATTTGAGCCCTGCTAGTAACCACCGTCTTCTACTGCTGTCAATTACC  
AGTCTTAGCTGCAGGAATTACGATATTACTGACAGATCGGAACCTAAACA  
CAACATTCCTTGATCCGGCAGGCGGAGGAGACCCAATCCTCTACCAACAC  
TTANNNNNNNNNNNNNNNNNNNNNNNNNNNNNNNNNNNNNNNNNNNNNNN  
NNNNNNNNNNNNNNNNNNNNNNNNNNNNNNNNNNNNNNNNNNNNNNNNNN  
NNNNNNNNNNNNNNNNNNNNNNNNNNNNNNNNNNNNNNNNNNNNNNNNNN  
NN-----  
-----  
-----  
-----  
-----  
-----  
-----







>Gonorynchus greyi

AGCCTCTTAATCCGGGCCGAGCTAAGCCAACCAGGCTCCCTATTAGGCGA  
TGACCAAATCTATAACGTCATTGTCACGGCACACGCCTTCGTTATGATCT  
TCTTTATAGTGATAACCCATTCTAATTGGGGGTTTCGGGAATTGACTAATT  
CCCCCATGATTGGGGCCCCAGACATGGCCTTCCCTCGAATGAATAACAT  
GAGTTTCTGACTACTTCCCCCTCTTTCCTTCTTCTTTTAGCCTCCTCGG  
GGGTCGAAGCCGGGGCAGGGACCGGGTGAAGTGTCTACCCACCCCTAGCC  
GGCAACCTCGCTCACGCAGGGGCTCGGTAGACCTAACTATTTTCTCCCT  
CCACCTCGCGGGTGTATCCTCTATTCTAGGGGCTATTAAGTTCATCACAA  
CTATCATCAACATGAAACCTCCGGCTATTTCCCAATACCAAACCTCCGCTA  
TTCGTATGGGCGGTTCTAATTACGGCCGTGCTACTTCTTCTGTCCCTTCC  
AGTACTAGCTGCCGGCATTACCATACTTCTTACGGATCGAAATCTGAACA  
CTACCTTCTTTCGACCCAGCGGGGGAGGAGATCCCATCCTCTACCAACAC  
TTGTTTTGATTCTTTCGGGCACCCCCGAAGTTTATATTCTAATTCTACCCGG  
CTTTGGGATGATCTCCACATCGTTGCTTACTACTCAGGTAAAAAAGAGC  
CGTTCGGCTACATGGGCATGGTCTGGGCTATGATGGCAATTGGCCTTCTA  
GGCTTCATTGTCTGAGCCACCACATGTTTACAGTTGGAATGGACGTCGA  
CACCCGGGNNNNNNNNNNNNNNNAGAACTTTCATCCATCCAAGTGCCTGGGAATGCTGCTGCTTT  
CAGATGCCACCAGTGCACGCAGCTCTCGCAGCTGTCCTGGAGCATGTGC  
CTGAGCAACTTCCCTGCCATCTGCAAAACAGAGGAGTTCCCTGCAGCTTCC  
CAAGGATATGCTGGTCCAGCTCCTGTGCACGAGGAGCTGGAGACGGAGG  
ACGAGCGGCTGGTCTATGAGTCAGCTCTCAACTGGGTGAAGTATGACCTG  
GAGAGCGGCACTGCCACCTTCCCTGAACTGTTGCGCACAGTGCCTTGGC  
ACTTCTGCCCGCCATCTTCCCTGATGGAGAACGTCTCCACCGAGGAGCTAA  
TCAACGCACAGGCTAAGAGCAAAGAGCTAGTGGATGAAGCCATCCGCTGC  
AAGCTGCGAATCTTGCAGAACGACGGCGTGGTCAACAGCCCCTGTGCCCG  
TCCACGAAAGACCAGCCATGCTCTTTTCTTGTGGGCGGGCCCACCTTCA  
TGTGTGACAAGCTCTACCTGGTAGATCAGAAGGCCAAGGAGATCATCCCC  
AAGGCAGACATCCCCAGCCACGCAAGGAGTTCAGTGCCTGCGCCATTGG  
CTGCAAGGTGTACGTGACAGGTGGTC--GTGGCTC-AGAGAACGGTGTGT  
CTAAGGATGTGTGGTCTATGACACCGTGCACGAGGAGTGGTCCAAAGCG  
GCGCCCATGCTGATCGCTCGGTTTGCCATGGCTCAGCTGAGCTGCGTCA  
CTGTCTTACGTGGTGGGGGTACACAGCCGCNNNNNNNNNNNNNNNNNNNNNNNNNNNNNNNNCGATGACTA  
CATAGTAG  
TTTTTCAGTCGTTCTGCTAATAGGCTCATCCTAAATGAGGCAGAGTTGCTT  
CTAGCCCTGGCACAGGAATTCCAAATGAGGACAGTCACTGTGTCCCTTGA  
GGAGCAGTCATTTGCTAGCATTGTCCAAGTCATCAGTGGAGCATCCATGC  
TGGTCAGCATGCATGGAGCCCAACTGATCACCTCCATGTTCTTCCGACGA  
GGTGCTGCTGTGGTAGAGCTCTACCCCTATGCAGTAGACCCGGAGCACTA  
CGCTCCTTACAAGACACTAGCCTCCTTGCCAGGCATTGACATTCAAGTATA  
TTGCATGGAGAAACAACCTTGGAGGAGAACTCTGTGGCCTACCTGAGCGC  
CCCTGGGACCAGGGTGGAAATTTACATCTGGAGAAGGAGGAGCAGGAGCG  
CATAGTTAACAGCAGGGAGGTGCCAGGCACCTGTGTTGCCGCAACCCAG  
AATGGCTCTATAGGATCTACCAGGACACAATAGTGGACATCCCTTCCCTTG  
CTGGAGTTCTCAG---GGAAGGTCTGAAG---ATCAAGCCTAATCTAAA  
AAA---GACTAAGGCTGCCAGCACAGTTTCATCCTGGACGAGTTTCGAGAGC  
CCAAGTGCCAGACTTCAGTGCAGGCCACCAATGAGGCTAAACTGTCAGTG  
TCATGGCAGATCCCGTGGAACCTCAAGTACCTAAAAGTTAGAGAGGTCAA  
ATATGAGGTATGGATACAGAAGAAGGATACCAGTAAGGGAACCCCTGGAGG  
ATCAAAATATCCAGGCTAACCCTGCCCTGGAGGCTTCGGAAATGCTAAA  
ACGGTGAGAAATGACAATTCCTCTCGCTTTGGAAAAGTTCATACGTATTCA  
TTTTGGCACAAGTGGTAAATTGGCYTCTGCTGACATAGAGACCTACCTGC  
TTGAAAAATCTCGAGTAACTTTTCAGCTCAAAGCAGAGAGGAATTACCAC

ATCTTTTTTTCAGATTCTGTCCAATGAAAAGCCAGAGTTGCTAGACATGAT  
GTTGGTTACGAATAATCCTTATGATTACTCCTACATCTCCCAAGGAGAAG  
TTACTGTTCAATCCATCAATGACAATGAAGAGCTATTAGCTACAGACAGT  
GCTTTTGTGATGTACTTGGCTTTACCTTGGAAAGAAAAAATGGCGGTCTACAA  
GTTGACAGGTGCAATAATGCATTATGGCAACATGAAGTTTAAGCAGAAGC  
AGCGGGAGGAGCAAGCAGAACCAGATGGTACAGAGTCTGCCGACAAGTCA  
GCTTACCTAATGGGGCTAAACTCTGCAGATCTYGYAAAGGGACTCTGCCA  
CCCGAGGGTCAAGGTCTGGCAATGAATATGTACAAAAGGGCAGAGTGTGG  
ATCAAGTCTACTACNNTACAAAGAGGGCCTTTAAGTGTGAGGAGTGTGGCAA  
GAACTACAACACCAAGCTGGGCTACAAGCGCCACGTGGCCATGCACTCGG  
CCACGGCGGGTGAACCTCACCTGCAAGGTGTGCCCTGCAGAGCTACGAGAGC  
ACGCCGGGCGCTGTGGAGCACCTGAAGAGCCACTCGGGCAAGTCCTCGGG  
CGGCGCAAGGAGAAGAAGCACCCGTGCGACCCTGCGACCGGGCGTTCT  
ACACGCGCAAGGACGTGCGGGCGCCACATGGTGGTGCACACCGGACGCAAG  
GACTTCCTGTGCCAGTACTGCGCCAGCGCTTCGGCCGCAAGGACCACCT  
GACGCGGCACGTGAAGAAAAGCCACTCGCAGGAGTGTGAAGATCAAGA  
CGGAGCCGCAGGACATGCTGGGGCTGCTGGGGCTCGGGATCTCCACCCTGT  
GCCATCAAGGAGGAGCTCAGCCCCATGATGTGCAGCATGGCAGCCGGCAA  
GGACCCCATGATGGCCAAGCCCTTCCCTGCGGGCACCCCTTCCCCATGG  
GCATGTACAACACCCATCAC-----ATCCAGGCCATGTCCAGCCCTGGA  
GTGGGCCAC-----CACCACCTCTCTGGTGCCGGGCTCCTTGTCTGC  
TGCTATGGGAATGGGCTGNNNNNNNNNNTACCTGATCTATGCCTCCTTCTCATTCATGGG  
ATGTTTACAAATCAATGATGGCCTGAACATTGTGAACCTGTTGGCCAGTA  
ATTACCCAGTGTGTCTGTTTGCCTCTGACGCAGCAGAAGTACTTCAGCAAC  
TACAGTCCAGTGATTGGCTTTTATATCTATGAGCCCATAGAGTACTGGAA  
CTCCACTGTGCAGGAGCACCTCAAGACTCTGGGCCAGGGCTTCAACAAGA  
TCTCCTGGATCGATAACTACTTTCACTACCTTAAGGTGGTGAACGTCAGC  
GCGTCAACCAAAAGCGATTTTCACTAATCCTCAAGACGTCTTTCCTSA  
AAGCCAGAGTATCAGCACTTCCACCGACGACATCATCTTCTCCAAAA---  
CCGGG-----ACGAGTATGACATCATCGCGTCGCGGATGTAC  
CTGGTGGCCAGGACGACGGAGAGGACGCGGGAGGAGGTGGTGGAGCTGCT  
GGAGAGGCTCCGGCCGCTGTCCCTCATCAACAGCATCAAGTTTCATCGTCT  
TCAACCCACCTTCGTCTTTCATGGACCGCTACAGCTCCTCCGTCATCTCC  
CCCATCCTGACATCGGGCTTCAGCGTCCTGACCATTTAATCCTCACCTT  
CTTCTGGTTCATCAACCCGCTGGGGAACTTCTGGTGTGATCCTGACGGTCA  
CCTCCGTGGAGCTGGGCGTCCCTGGGGCTGATGNNNNNNNNNNNNNNNNNNNNNNNNNNNNNNNNNNNNNNNNNNNNNNNNNNNNNNNNTGATGATGTG  
NNNNNNNNNNNNNNNNNNNNNNNNNNNNNNNNNNNNNNNNNNNNNNNNNNNNNNNNNNNNNNNNNNNNNNNNNNNNNNNNNNNNNTGATGATGTG  
CCAGCGGA  
CACCATTGCCCGTCTGTTTCCGCTATGACGTAGCTCTGGTGTCTGCGCTGA  
AAGACATGGAGGAGGACATCATGGAGGGTCTGAGGGAGAGAGGGCTGGAT  
GACAGCACCTGCACCTCTGGTTTCATAGTGATGATCAAAGAGTCTTCCGGA  
CGGTATGGGGGATGTCAGCGAGAAACATGGAGGTGGACCAGCTGTTCAG  
AGAAAGCAGTGAGGTTCTCGTTCACGGTGTATGTCCATCTCTGTCCATGCA  
GAAGGTAAGGAG-----GAAGCCGT  
CACCATCTTCCAGGAGCGAAAGCCAACTCCGAGCTGTCCTGCAGGCCTC  
TATGTCGTATGTTTGTGATGAGTCAGACCATGAGACGCTCACGGCCATC  
CTGGGCCCTGTGGTGGCTGAACGGAGAGCCATGAAAGAGAGCCGGCTGAT  
CTTGTCGTAGGGGGCTTGAACGTTCTTTCAGGTTTCAGTTCCGGGGCT  
CAGGCTATGACGAAAAGATGGTGCCTGAGATGGAGGGCCTGGAGGCCTCA  
GGGTCCACCTACGCTGCACCTTGTGCGACTCCACCCGAGCTGAGGCCTC  
CAAGAACATGGTGTGCTGACTCCATCACCCGAAACCATGACGAGAACCCTG  
AGCGCTACGAAGTGTGGAGGACCAACCCTTACTCTGAGTCTATTGAGGAG  
CTCAGAGACAGGGTCAAGGTGTCTCAGCCAAGCCCTTCATGGAGACCCA













CCCCTAATGATTGGAGCCCCGACATGGCCTTCCCTCGAATGAACAACAT  
AAGCTTCTGACTCCTTCCCTCCTTCCCTTCTCCTGCTCGCCTCTTCTG  
GGGTAGAAGCCGGTGCTGGAAGTGGTTGAACGGTTATCCCCCTCTAGCA  
GGAAATCTTGCTCACGCCGGTGCGTCTGTAGACCTAACAAATCTTCTCCCT  
TCACTTAGCCGGTATCTCATCAATCTAGGGGCCATCAACTTTATTACAA  
CTATCATTAACATGAAGCCTCCTGCTATCTCCCAATACCAAACCCCACTA  
TTTGTATGAGCTGTGCTGATTNCAGCCGTCTTGCTCCTGCTTTCTCTCCCC  
GTCCCTCGCTGCCGGAATTACAATGNTTNTGACAGATCGAAATCTAAACACCA  
CTTTCTTTGACCCCGCAGGAGGAGGTGATCCTATTTCTCTATCAACATCTG  
TTC-----  
-----  
-----  
-----

-----NNTTGGAGAAGAACCCTTCATCCATCAAACCTGCCTTGGCATGCTG  
TTGCTGTCCGATGCTCATCAGTGCACCAAGCTCTCAGAGCTTTCTGGGG  
CATGTGCCTCAGCAACTTCCCYGCTATTTGCAAGACAGAGGACTTCCCTCC  
AACTGCCCAAAGATATGGTGGTACAGCTTTTGTACATGAGGAGCTAGAG  
ACAGAAGATGAGAGACTGGTRTATGAAGCTGCCCTGAACTGGATCAACTA  
TGATTTGGAAAAGAGGCACAGCCACCTCCCAGAACTCCTGAGGACTGTTT  
GTCTGGCTCTGCTTCCAGCCATCTTTCTGATGGAGAACGTATCCACWGAA  
GAGCTTATCAACGCCAGGCCAAGAGCAAGGAGCTGGTGGATGAAGCTAT  
CAGGTGTAAGCTGAAGATCCTRCAAAAATGATGGYGTGTAAACAGCCCAT  
GTGCCAGGCCAAGAAAACCAGCCATGCCCTGTTTCTTCTGGGTGGGCAG  
ACCTTCATGTGCGACAAACTGTACTTGGTGGATCAGAAAGCCAAAGAGAT  
TATCCCTAAAGCTGACATCCCAGCCCKAGGAAAGAGTTTAGCGCCTGTG  
CCATTGGCTGTAAAGTGTACATTACTGGTGGCA--GAGGCTC-TGAGAAT  
GGTGTGTCCAAAGATGTGTGGGTCTACGACACAGTCCATGAGGAATGGTC  
CAAGGCRGCACCCATGCTGATTGCAAGTTTGGTCATGGTTCTGCTGAGC  
TGAAACACTGCCTGTATGTGGTAGGAGGTCATACTGCTGCAACTGGCTGC  
CTTCCAGCCTCTCCATCAGGACGAGTACATTGTTGTGTTTCTGATCGATCAA  
CAACGAGACTGATCCTGAATGAAGCGGAGCTGATCATGGTGTGCTGGCCAG  
GAGTCCAGATGAGGGTGGTACCGTGTCTCTGGAGGAGCAGTCCCTCCC  
CAGCATCGTGCAGATGATCAGCGGGCGTCCATGTTAGTCAGCATGCATG  
GAGCCAGCTCATTACCTCACTCTTCCCTCCCAGGAGAGCTACCGTGGTG  
GAGCTCTTCCCCTTGTGTGAACCCGGAGCAGTATACCCCTACAAGAC  
CCTGACCTCTCTGCCAGGCATGGACCTTCACTACATCGCCTGGAGGAACA  
CGATGGAGGAAAACACCATCACCCACCCAGACAGAGGCTGGGAACAAGGG  
GGCATCACTCACCTGGAGAGGGACGAGCAAGACCGGATCTTGGCCAGCAA  
AGACGTCCCAGACACTTGTGTGCTGCCGGAACCCGAGTGGCTCTTCCGGA  
TCTACCAGGACACCCCTGGTGGACATCCCTTCTTTCTTGGAAAGTCTCAA-  
--AGAGGGAATGAAG---ACAAAGCCAGCATGAAGAA---GTCTAAGCC  
AGCAAGCATGGTCCACCCGGGCCGGGTGCGGGAGCCGCAGTGTGACACCT  
CCGTACAAACCACCAATGAGGCTAAACTGACAGTCTCTTGGCAGATCCCC  
TGGAATCTGAAGTACCTGAAGGTGAGGGAGGTGAAGTATGAAGTCTGGAT  
CNNNAAAAGGACACCAGCAAGGGGACCCTGGAGGATCAAATCATCCAGGCTA  
ACCCTGCGCTGGAGGCCCTTGGAAAACGCCAAAACCTTGAGAAATGACAAC  
TCATCACGTTTTTGGAAAATTCATCCGAATTCACCTTCGGTACGAGCGGCAA  
GCTGTGCTCTGCCGACATCGAGACGTACCTACTGGAGAAGTCTCGAGTCA  
CCTTTCAGCTCAAGGCTGAGAGGAAC TACCACATCTTTTACCAGATCCTG  
TCCAACCAGAAGCCAGAGCTGCTGGACATGCTGCTGATCACCAACAACCC  
TTACGACTACTCCTACATCTCCAAGGAGAGGTAACAGTCGCCTCCATCA  
AYGAYGCCGAGGAGCTGATGGCCACTGACAGCGCCTTTGACGTSCTGGGC  
TTCACTCCGGAGGAGAAGATGGGCGTCTACAAAACCTGACYGGCGCCATCAT

GCACTACGGAAACATGAAGTTTAAAGCAGAAGCAGCGGAGGAGCAGGCTG  
AGCCAGATGGGACGGAGGCTGCAGATAAATCCGCTTACCTCATGGGGCTG  
AACTCTGCTGACCTCATCAAAGGACTGTGCCATCCAGAGTCAAGGTCGG  
GAATGAATACGTCACCAAAGGACAAAGTGTGGACCAGGTCTACTACCCCA  
ACAAGGAGGCCTTTAAATGTGAGGAGTGTGGGAAGCACTACAACACCAAG  
CTGGGCTACAAGCGCCATGTGGCCATGCACTCCGCCACTGCCGGGGACCT  
CACCTGTAAGGTGTGCATGCAGACGTACGAGAGCACGCCGGTTCTCCTGG  
AGCACCTGAAGAGCCACTCCGGGAAGTCCTCTGGAGGCGCCAAGGAGAAG  
AAACACCCGTGTGACCACTGCGACCGCGCTTCTACACCAGGAAGGACGT  
AAGACGCCACATGGTTCACACCGGGGCGGAAGGACTTCCTGTGTCAGT  
ACTGTGCCCAGCGCTTGGCAGGAAGGACCACCTGACGCGCCACGTGAAG  
AAGAGCCACTCCCAGGAGCTGCTGAAGATCAAGACGGAGCCTCCTGATAT  
GCTGGTTCCTTGGCATCAGCGTCGCCCCCTGCTCCGTGAAGGAGGAGC  
TCAGCCCTATGATGTGCGGCGTGGGGCCCAACAAAGACCCCATGATAGGC  
AAACCCCTTCCCTGGGGGCCCCCTTCCCCATGGGCATGTACAACCCCA  
CCAC-----CTCCAGGCCATGTCAGGCCCC-----

--

CACCCGTCCCTGATGCCCCCTCCCTGNNNNNNNNNNNNNNNNNNNNNNNNNNNNNNTACCTCATTT  
ATGCCTCTTTC

TCATTCATGGGATGTTTACAAATCAGTGATGGATCCAATATAGTGAACCT  
GCTGGCTAGTAACTCCCGAGTGTAACCTATGCTATGACCCAGCAGAAAT  
ACTTCAGCAACTATAGTTCCTGTGATCGGGTTTTACATTTATGAGCCAATT  
GAGTACTGGAACTCCACAGTACAGGATCACCTGAAAACCTCTGAGTCATGG  
TTTTAACAAGATCTCCTGGATTGACAATTTCTTCCACTACTTGAGGGTGG  
TGAATGTGAGTGCAACAACAAAAGCGATTTTCATCACYATACTCAAGGGC  
TCTTTCCTGCGCAGCCAGAGTATCAGCACTTCACCGAGGATATTATATT  
CTCCAAGA---ACCGTGAGACCG-----ATGAGTACGACATCATCGCTT  
CTAGGATGTACTTGGTGGCGCGGACGACGGAGAAGAAGCGCGAAGAAGTG  
GTGGAGCTTCTGGAGAACTTCGTCCACTAATGCTTATCAACAGCATCAA  
GTTTCATTGCCTTCAACCCTACGTTTGTGTTTCATGGACCGCTACAGCTCTT  
CTGTGATCTCGCCATCCTGACCTCAGGCTTCAGCGTACTCACAATCCTC  
ATCCTCACTTTTTTTCTGGTTATCAATCCCTTGGGGAACCTTCTGGCTCAT  
TCTCACGGTAACCTCTGTAGAGCTCGGTGTTTTGGGTTTAAATGGGATTC  
ACCAGTTTGAATGGCAACCAGCTCTCAAAAATGTGTCCACTTCTTGCAAT  
GTAGGCATTATTAACGGGCTCTCTGGATGGGCCTCATCGGTGGATGACTC  
CCCAGCTGACACCATCACTCGTCCGTTTCGCTATGATGTGGCACTGGTKT  
CAGCGTTAAAGGATCTGGAGGAGGACATCATGGAGGGGCTGAGAGAGAGT  
GGGCTGGAAGACAGTGTCTGACTTCAGGCTTCAGTGTCTGATCAAGGA  
ATCCTGTGACGGCATGGGTGATGTCAGCGAAAAGCATGGCGGAGGACCAG  
CTGTTCCTGAGAAGGCTGTGCGTTTTCTTTTACCATCATGTCTGTCTCT  
GTAAGGGCAGAGACTAAGGAG-----  
-GAAGACATTACCCTTTTACCGAGCCAAAGCCAAACTCGGAGCTGTCCT  
GTAAACCCCTCTGCCTGACATTTGTGGATGAGTCAGACCATGAGACACTC  
ACAGCAGTCTGAGCCCCGTAGTTACAGAGCGTAAAGCAATGGCAGAAAG  
CAGGCTCATCCTATCCATAGGTGGACTGCCTCGCTCATTCCGCTTTCCT  
TCAGAGGCACAGGATATGATGAGAAGATGGTACGTGAGATGGAGGGCCTT  
GAGGCTTCAGGGTCCACCTATATCTGCACTCTTTGTGACTCCACTCGAGC  
AGAGGCCTCTCAAAAATGGTGTGCACTCTGTCAACCCGAGTCACGACG  
AAAACCTGGAGCGCTATGAAATCTGGCGAACCAATCCCTATTCTGAGTCT  
GTGGAGGAGCTGAGAGAAAGAGTAAAGGGGGTATCAGCCAAACCCCTCAT  
GGAGACTCAACCAACGCTTGACGCTCTGCATTGTGACATTGGCAATGCCA  
CTGAGTTCTACAAAATCTTCCAAGACGAGATTGGAGAGGTGTACGAAAAG  
GT---CACT---CCTAGCCGTGAGGAACGGCGCAGCTGGAGGGCAGCCTT

AGATAAACAGCTGAGGAAGAAGATGAAGCTCAAACCGGTGATGAGGATGA  
ATGGAAACTATGCCCAGCTGATGACCATGGAGGCTGTGGAGGTGGTG  
TGCGAGTTGGTGCCCTCAGAGGAGAGGAAAGAGGCCCTGAGGGAGCTCAT  
GAGACTGTACCTCCAGATGAAGCCTGTCTGGCGTGCCACCTGCCAGCCA  
AGGAGTGCCCTGACCAGCTGTGCCGCTACAGCTTAACTCTCAGCGCTTT  
GCAGACCTCCTCTCTCCACCTTCAAGTACAGGTATAATGGAAAGATAAC  
AAATTACCTGCACAAGACCCTGGCCCATGTGCCGAAATCATAGAGAGAG  
ATGGATCCATAGGGGCCCTGGGCCAGTGAGGGGAACGAATCAGCNNNNNNNTCGTACA  
ACATCGAGATGGGACCCTTGGGGCCTCGGTGGAAGGACAGCCACAGCCT  
TTCAACTGCTCTATCGAAGATCCAACATAACAGACAAAGTTCAAGGGTAT  
CAAGACGTATATTTTCATACCGGGTCACACCGAGCCACACAGGACGACCTG  
TGTACAGACGCTACAAACACTTCGACTGGCTGTACAACCGCTTACTGCAC  
AAGTTCACTGTGATCTCTGTTCCCTCACCTGCCTGAGAAGCAGGCCACRGG  
GCGATTTGAAGAAGACTTCATTGAGAAGCGAAAGAGACGATTGATACTCT  
GGATGAACCACATGACCAGCCACCCAGTCCTCTCCAGTACGAAGGCTTT  
GAGCACTTTCTGATGTGTGCCGACGACAAACAGTGGAACCTGGGCAAGAG  
ACGGGCGGAGAAGGACGAGATGGTAGGTGGACACTTTATGCTGACCCTCC  
AGATTTCCAACGAGCACCAGGATCTTCAGGACGTAGAGGAGCGCATTGAC  
TCCTTCAAGTCCTTTGCTAAGAAAATGGACGACAGCGTGATGCAGCTCAC  
GCACGTTGCCTCGGAGCTGGTTTCGTAACACCACGGCGGGTTTCAGGAAGG  
AGTTCCAGCGACTTGGAACGCCTTCCAGTCTGTCAGCCAGGCGTTCATG  
CTGGACCCTCCGCACAGCTCTGACACCTTCAACAACGCCATCTCACACCC  
TCTCGCTACGTTCCCTCAAACCTGACCTCTTTGGGTTTTATCATCGGAGTCG  
GTGTGGTTCGGGAACCTCCTGATCTCCATCCTGCTGGTCAAAGACAAGAGC  
TTGCACCGAGCGCCCTATTATTTCTGCTGGATTTGTGTGCGTCCGATAT  
CCTGCGCTCCGCCATCTGCTTCCCCTTCGCTTTCACCTCGGTCAAGAATG  
GATCCGCGTGGACGTACGGGACGCTGACCTGCAAAGTCATCGCCTTCCTG  
GGTGTGCTCTCCTGTTTCCACACGGCATTATGCTATTCTGTGTTAGCGT  
CACRCGCTACCTAGCCATCGCACATCACCGTTTCTACACCAAGAGGCTGA  
CCTTCTGGACCTGCTTGGCTGTCACTGTCATGGTTTGGACGTTGTCAGTG  
GCGATGGCGTTCCCGCCGGTGTGGACGTAGGGACGTACTCGTTTATCCG  
CGAGGAGGACCAGTGCACGTTCCAGCACCGCTCCTTCAGGGCGAACGATT  
CGTTGGGATTTCATGCTCCTGCTGGCGCTCATCCTCCTCGCCACACAGCTG  
GTTTACCTCAAGCTCATCTTCTTGTCCACGACCGCCGAAAAATGAAGCC  
CGTCCAGTTTGTGCCCGCCGTCAGCCAGAACTGGACCTTCCACGGGCCAG  
GCGCAAGCGGGCAGGCGGCGGCAAACCTGGCTGGCCGGCTTCGGCCGAGGC  
CCTACTCCGCCTACTTTGCTGGGAATCCGGCAGAACAGCAACGCAGCGGG  
CCGCCGGCGTCTTTTGGTGTGGATGAGTTCAAACAGAGAAGAGGATTA  
GTAGGATGTTCTACATCATGACGTTTTTCTTCTCCTGGCGCTCTGGGGGCC  
TATCTGGTGCCTGCTACTGGCGGGTGTGTTGCGAGGGGCCCGTGGTCCC  
CGGGGGCTACCTGACGGCAGCTGTGTGGATGAGCTTTGCCAGGCTGGAG  
TCAATCCGTTTCATCAGCATCTTCTCCAACAGCGAGGCCAAATCTCGCTTT  
CACCTTGGCGTGGGGACTGGGCCTGGCACAGAGC---GCAGCGTCCCACT  
CGGCAACAGCTTGCTCTCCCCGAGCAGAGCGAGGAGCCCACTGTTGCCA  
CCCCCCGAGCGATGGTTTGTACCC---CTGCCAACAACCGACTGGAC  
TTTGTGCTGCCTCGGCATACGACGCCGCG-----GATTTCCGCCGGTAA  
CGCCGCCACCTTGCTGTCTACGCGGCGGCGGAGTGAAGGCTC-----  
TTCCCTGCCGACTGCGGGCTGCTCCAACCGGCTCTTGGCTATTACGCA  
GACCCATCGG---GCTGG---GGAGGACGCACGCCCGCCGAGTACTGTGG  
CGTCAACACCAAATCCAGCTCGGTCTTTTCTGCTGGCCCACTAACTCTC  
TCGGTGGCAGGGCAGGAG---CC---AATTACCTGT-----CCGAG  
GA---GGGT---GACTC---CATCCCCACGGAGAGGTCACCA---AT---  
CGGCGGCTCGGAGGAG---ACCAAACCCAAAGACATGAC---GTCAGA--



-----  
-----  
-----GGATAAAAAACATTGTCGTGTTTCAGT  
CGTTCAACCACGAGACTAATCCTGAACGAAGCAGAGCTCATCATGGCGCT  
GGCCAGGAGTTTCAGATGAGGGTGGTGACGGTAAACCTGGAGGAGCAGG  
CGTTCCCCAGCATCGTCCAGGTGATCAGCAGCGCCACCATCTTAGTCAGC  
ATGCACGGAGCTCAACTCATCACCTCACTCTTCCCTGCCAGAGGAGCCGT  
TGTGGTGGAGTTGTTCCCTTCCGCTGTGAACCCGGAGCAGTACACCCCAT  
ATAAACTCTCGCTTCCCTTCCGGGCATGGACCTTCATTACATCTCCTGG  
AGGAACACTGTGGAGGAGAACACTGTCACCCACCCAGACAGGCCCTGGGA  
ACAAGGGGGTATCGCTCATTTGGATAAAGAGGAGCAGGAACGAATCCTGG  
CGAGTAAGGATGTGCCAGGCATCTCTGCTGCCGAAACCCAGAGTGGCTC  
TTCCGGATCTACCAGGACAGTTTGTGGACGTCGCCCTCTCTCCTAGAAGT  
CCTTAA--AGAGGGCATGAAT--GCAAAGCCCAACTTGAGGAA--GT  
CAAAACCGGCCAGCACGCTGCACCCGGGCAGGGTCAGAGAACCCAGTGT  
CAGACTTCAGTTCAAACCAGCAGCGAGGCTAAACTCACGGTCTCCTGGCA  
GATACCGTGAATCTGAAATACCTGAAGGTGAGAGAGGTGAAGTACGAGG  
TGTGGATCCAGAAGAAGGACGCCAACAAGGGGTCCCTGGAGGATCAGATC  
ATCCAGGCGAACCCGGCGCTGGAGGCCCTTCGGGAACGCCAAGACGCTCCG  
GAACGACAACCTCGTCCCGCTTCGGGAAGTTCATCCGAATCCACTTCGGCA  
CCAGCGGGAAGCTGTGCTCTGCCGACATCGAGACGTACCTGCTGGAGAAG  
TCCCGGGTACCTTCCAGCTCAAGGCTGAGAGGAACTACCACATCTTCTA  
CCAGATCCTGTCCAACCAGAAGCCGGAGCTGCTGGACATGCTGCTGATCA  
CCAACAACCCCTACGACTACTCCTACATCTCGCAGGGGGAGGTGACCGTC  
GCCTCCATCAACGACTCGGAGGAGCTGATGGCCACGACAGCGCCTTCGA  
CGTGCTCGGCTTACCCCCGACGAGAAGATGGGCGTCTACAAGCTGACGG  
GTGCCATCATGCACTACGGCAACATGAAGTTCAAGCAGAAGCAGCGCGAG  
GAGCAGGCCGAGCCGGACGGGACGGAGTCCGCGGACAAATCGGCCTACCT  
GATGGGGCTGAACTCCGCCGACCTCATCAAAGGGCTGTGCCACCCAGGG  
TCAAAGTGGGGAACGAGTACGTACGAAAGGCCAGAGCGTGGACCAAGTC  
TACTACCCCAACAAGGAGGCCTTCAAATGCGATGAGTGTGGGAAGCACTA  
CAACACCAAGCTAGGATAACAAGCGCCATGTGCGCATGCATTCCGCCACAG  
CAGGGGATCTCACCTGTAAGGTGTGCATGCAGACCTACGACAGCACGCCG  
GTGCTCCTGGAGCACCTGAAGAGCCACTCTGGGAAGTCCTCAGGTGGCAC  
CAAGGAGAAGAAACACCAGTGTGACCCTGTGATCGGCGTTTCTACACAA  
GGAAGGACGTGAGACGCCACATGGTGGTCCACACGGGCCGGAAGGACTTC  
CTGTGCCAGTACTGTGCCAGCGCTTCGGCAGGAAGGACCACCTGACGCG  
CCACGTGAAGAAGAGCCACTCGCAGGAGCTGCTAAAAATCAAGACGGAGC  
CCCCAGACATGTTGGGCCTCCTGGCTTCGGGGTCGCCACCATGCTCCGTG  
AAGGAGGAGCTTAGCCCCCTGATGTGCGGTATGGGGCCCAACAAAGACCC  
CATGATGGGCAAACCCCTTCCAGCGGGGCCCTTTTCCAATGGGCATGT  
ACAACCCTCACCAC-----CTGCAGGCCATGTCTCATTCTGGGGTGGGT  
CATTCA-----CACCCGTCCCTGATGTCCAGCCCCCTGTCTGCAGCTAT  
GGGCATGGGCTGTCCATGGACTACCTCATCTACGCTTCTTTCTCATTCA  
TGGGATGTTTACAAATCAGTGACGGGTGCAATATCGTGAACCTGCTGGCG  
AGTAACTCTCCAAGTGTCTCATATGCTCTGACCCAGCAAAAATACTTCA  
TAACTACAGTCCGGTTCATTGGGTTTACATTTATGAGCCCATCGAGTACT  
GGAACCTCGACAGTGCAGGAGCACCTGAAGACTTTGAGTCACGGCTTCAAC  
AAGATCTCCTGGATGGACAACCTTTTCCACTACCTGCGGGTGGTGAATGT  
GAGCGCATCAACCAAGAGCGACTTCATCAACATCCTCAAGGGCTCCTTCC  
TGCGCAGCCCGGAGTACCAGCACTTCACCGAGGACATCATTTTTTCAAAG  
A---ACCGCGAGACCG-----ACGAGTACGACATCATCGCCTCACGGAT  
GTACTTGGTGGCGGGACTACAGAGAAGAAGCGCGAGGAAGTGGTAGAGC



TTCTGGAAAACTTCGCCCGTTGATGCTGATCAACAGCATCAAGTTCATT  
GCCTTCAACCCACGTTTGTGTTTCATGGACCGCTACAGCTCCTCGGTCAT  
CTCGCCATCCTGACCTCAGGATTCAGCGTGCTCACAAATCTTCATCCTCA  
CTTTGTTCCTGGTCATCAACCCCTGGGTAATTTCTGGCTCATCCTCACT  
GTAACGTCGGTGGAGCTGGGCGTCTGGNNNNNNNN-----

-----TCTTACACCATGAG  
ATGGGTTCCGTGGGGCCCCGATGGAAGGAGAGCCACAGCCGTTTCCTG  
TTCCGTTGAAGACCCACAAAACAGACAAAGTTCAAGGGTATCAAGACGT  
ACATTCATACAGGGTGACACCAAGCCACTCTGGGCGTCCCGGTGTACAGA  
CGCTACAAACACTTTGACTGGCTGTACAACCGCTTACTGCACAAGTTCAC  
TGTGATCTCTGTGCCTCATCTGCCCCGAGAAGCAAGCCACGGGGCGTTTG  
AGGATGACTTCATTGAGAAGCGCAAGAGGCGACTGATACTGTGGATGAAC  
CACATGACCAGTCACCCAGTCCTCTCCCAGTATGAGGGCTTTGAGCACTT  
TCTGATGTGCGCTGACGACAAGCAGTGGAAACTGGGAAAGAGACGGGCAG  
AGAAAGACGAGATGGTGGGAGCCCATTTTCATGCTGACTCTCCAGATCCCT  
AATGAGCACCAGGACCTTCAGGATGTGGAGGAGCGGATCGACTCCTTTAA  
GTTCTTTGCTAAAAAGATGGATGACAGCGTGATGCAGCTCACGCACGTTG  
CCTCGGAGCTGGTGCCTAAGCACCTGGGCGGGTTTCAGGAAGGAGTTCCAG  
AGGCTGGGAAATGCCCTCCAGTCTATCAGCCAGGCGTTCATGTTGGACCC  
TCCCAGAGCTCAGAGACCTTCAACAACGCCNNNNNNNN-----



GCTAATCTAGCCCATGCCGGAGCATCCGTAGACCTAACTATCTTCTCACT  
CCACCTAGCAGGCGTTCATCAATCTCGGAGCCATTAACCTTATTACCA  
CAATTATTAACATAAAACCCCCAGCCATCTCACAAATACCAAACCCACTT  
TTCGTGTGATCAGTGCTTGTTACTGCAGTACTGCTACTATTATCTCTGCC  
AGTCTTAGCCGCAGGAATCACTATACTACTTACAGACCGAAATCTAAACA  
CAACTTCTTTGATCCAGCAGGAGGAGGAGACCCAATCCTTTACCAACAC  
CTANNNNNNNNNNNNNNNNNNNNNNNNNNNNNNNNNNNNNNNNNNNNNNNNNNNNN  
NNNNNNNNNNNNNNNNNNNNNNNNNNNNNNNNNNNNNNNNNNNNNNNNNNNNNN  
NNNNNNNNNNNNNNNNNNNNNNNNNNNNNNNNNNNNNNNNNNNNNNNNNNNNNN  
NN-----

-----  
-----  
-----  
-----  
-----  
-----  
-----  
-----  
-----  
-----  
-----  
-----  
-----  
-----  
-----

-----GGACGAGTATATTGTGGTCTTCAGCCGCTCCGTT  
AACAGGCTGATCCTGAACGAGGCAGAGCTGATCCTGGCACTAGCCAGGA  
GTTTCAGTTGAAGGTCGTTACAGTGTCCCTAGAGGAACAGTCTTTTGCAG  
ACATCATCCGAGTCATTAGCAGGGCATCTATGCTGGTCAGTATGCACGGG  
GCCAGCTGGTCACTTCTCTCTTCCCTTCCCCGTGGCGCTGCTGTGGTGA  
GCTCTTTCCATATGCCGTCAACCCAGAGCATTATGCTCCCTACAAGACAC  
TCACCTCGCTGCCAGGCATGGACCTGCAGTATGTGGCCTGGAGGAACACC  
AAGGAGGAGAAGTCTGTGACCTTCCCCGAGCGTGCCTGGGACCAGGGCGG  
CATTGCACACTTGAGAGGAGGAGCAGGAACGTATCCTGAAGAGCAGCG  
AGGTGCCGCGACACCTGTGTGCTGTCGGAACCCGGAGTGGCTCTTCCGCATC  
TACCAGGACACCAAGGCGGACATTGCATCCCTACTGAAGCACTGCG---  
CCAGGGACTGACC---TCCAGGCCAGGGCCAAAAG---GGCTAGGCCCA  
GCAGCACAGTCCACCCAGGCAGGGTGAGGGAGCCCAAGTGCCAGACCTCC  
GTCCAGGCTACCAACGAGGCCAAGCTGACCCTGTCCCTGGCAGATCCCGTG  
GAACCTCAAGTACCTGAAGGTCAGGGAGGTGAAGTATAGAGTCNNNNNNNNAAGAAGG  
ATACCAGCAAGGGCACACTGGAGGATCAAATCATCCAGGCTAACCAGCG  
CTGGAGGCTTTCGGCAATGCTAAGACTGCGAGGAACGATAACTCCTCGCG  
TTTTTGGGAAATTCATCCGCATTCATTTTGGAGTAAGTGGAAGCTTTCCT  
CTGCTGACATCGAAACTTACCTGCTTGAGAAATCTCGTGTCACTTTCAG  
CTCAAAGCCGAGAGGAACTATCACATCTTTTACCAGATTATGTCCAACAA  
AAAGCCTGAATTGCTGGACATGATGTTGATTACTAACAACCCATACGATT  
ATGCTTACGTCTCCCAAGGAGAGGTGACAGTCCGTCATCGATGACTCA  
GAGGAACTGATCGCCACAGACAGTGCCTTTGATGTGCTGGGATTACAGC  
TGAGGAGAAGATGGGTGTCTACAAGCTGACAGGTGCTATCATGCACTATG  
GAAATATGAAATTCAGCAGAGGCAGCGTGAGGAGCAGGCTGAGCCTGAT  
GGCACTGAGTCTGCTGACAAGTCAGCCTACCTGATGGGGTTGAACTCAGC  
CGACCTTCTCAAAGGACTTTTGCCACCCAAAGGGTTAAAGTGGGGAATGAGT  
ATGTCACAAAGGGCCAAAGTGTGGATCAGGTTTACTTTCCCAAC-AAGAG



-----  
-----  
-----TCATACACCATCGAGATGGGCCCCTGGGG  
CCCCCAGTGGAAGGAGAGCCCCAGCCCTTCTCCTGTTCCATCGAGGACC  
CCACCAAACAGACTAAATTCAAGGGGATAAAGACCTACATCTCGTACCGC  
GTGACGCCAGCCACACAGCTCAGCCCGTATAACGCCGCTACAAGCACTT  
CCACTGGCTCTACAACCGGTTGCTACACAAGTTCACGGTCATCTCCGTGC  
CACACCTGCCCCGAGAAGCAGGCCACGGGCCGCTTCGAGGAGGACTTCATC  
GAGAAGCGGAAGAGGGCGGCTCATCCTGTGGATGGACCACATGACCAGCCA  
CCCGGTGCTGTGCGCAGTACGAGGGCTTCGAGCACTTCCTCATGTGCGCCA  
ACGACAAGCAGTGGAAGCTGGGCAAGCGGCGGGCGGAGAAGGAAGAGTTG  
GTGGGCGCGCACTTCATGCTCACCTTCCAGATCCCCAGCGAGCACCAGGA  
CCTGCAGGACGTGGAGGAGCGCGTGGACTCCTTCAAGGCCTTCGCCAAGA  
AGATGGACGACAGCGTGCTGCAGCTCACACACGTGGCGTCCGAGCTGGTT  
CGGAAGCACCTGGGCGGTTTTCCGGAGGGAGTTCCAGCGGCTGGGGAACGC  
CTTCCAGTCCATCAGCCAGGCCTTCACCCTGGACCCTCCCTACTGCTCCG  
ACGCCCTCAACACCGCCATCNNNNNN-----

-----  
-----  
-----  
-----  
-----  
-----  
-----  
-----  
-----  
-----  
-----  
-----  
-----  
-----  
-----  
-----  
-----  
-----  
-----  
-----  
-----  
-----  
-----  
-----  
-----

>Harpadon nehereus

AGCCTTTTGGATCCGCTGAGCTGAGCCAGCCGGGGGCCCTGCTCGGTGA  
CGATCAAATTTATAACGTAATCGTTACTGCCACGCCCTTCGTAATAATTT  
TCTTTATAGTAATGCCAATTATGATCGGGGGCTTTGGAAATTGACTCATT  
CCCCGATGATCGGTGCCCGGATATGGCGTTTTCCCAAATGAATAACAT  
AAGCTTTTGGACTCCTCCCACCCTCTTCCTTCTTCTCTTGGCATCATCGG  
GAGTCGAAGCAGGGGCTGGAACCGGCTGAACAGTCTATCCTCCGTTAGCG  
GGAAACCTTGCTCACGCCGGGGCCTCTGTAGATCTAACCATCTTCTCGCT  
ACACTTGGCTGGGATTTCCCTCTATTTGGGAGCCATTAATTTTATTACGA  
CAATTATCAATATAAAACCTCCCGCCATTTACAATAACCAGACACCCCTC  
TTTGTGGGGCTGTACTGATTACGGCTGTCTTCTCCTCCTCCTTACC  
CGTTCTTGCAGCCGGAATACAATGCTCTTAACGATCGAAATCTTAATA  
CCACCTTCTTTGACCCTGCAGGGGGCGGGATCCCATCCTCTATCAGCAC  
TTATTCTGATTCTTTGGCCACCCCGAAGTGTATAATTTAATCCTCCCTGG  
ATTCGGCATGATCTCCACATTGTAGCCTACTACGCAGGGAAGAAAGAGC  
CGTTTGGCTATATGGGCATGGTCTGGGCAATGATGGCAATCGGCCTATTA  
GGTTTCATCGTCTGGGCCACCACATGTTTACNNNNNNNNNNNNNNNNNNNN  
NNNNNNNNNNNNNNNNNNNNNNNNNNNNNNNNNNNNNNNNNNNNNNNNNN  
NNNNNNNNNNNNNNNNNNNNNNNNNNNNNNNNNNNNNNNNNNNNNNNNNN  
NNNNNNNNNNNNNNNNNNNNNNNNNNNNNNNNNNNNNNNNNNNNNNNNNN  
ACGGAGGACTTCCCTGCAACTCCCCAAAGACATGGTCATACAGCTTCTGTC  
CCACGAAGAGCGGGGAGACAGAGGATGAGAGGATGGTGTATGAGGNAGCCAT  
TCACTGGGTCAACTATGACGGGGAGAGGAGGCACTGCCACCTACCAGAAC  
TTCTGAGGACAGTTAGTCTAGCCCTTCTCCCAGCCATTTTCTCATGGAG  
AATGCTCCACGGAGGAGCTGATCAATAACCAGACCAAAGCAAGGAGCT  
GGTGGACGAGGCCATTCGCTGCAAGTTGAGAATCCTCCAGAACGACGGGG  
TGGTCAACAGTCCCTGTGCCAAACCTAGAAAGACCAGCCATGCCTTGTTC  
CTTCTGGGAGGGCAGACTTTCATGTGTGACAAACTTACTTGGTGGATCA  
AAAGGCCAAGGAGATCATTCCCAAGGCTGACATCCCAGTCCCAGGAAGG  
AGTTCAGTGCTTNTGCCATCGGGTGTAAAGGTNTACGTGACAGGTGGAA--GT  
GGCTC-TGAGAACGGAGTGTCCAAANACGTGTGGGTGTTAGACACCATCCA  
TGAGGAGTGGTTACAAGGAGCACCCAGCGANNNNNNNNNNNNNNNNNNNNN  
NNNNNNNNNNNNNNNNNNNNNNNNNNNNNNNNNNNNNNNNNNNNNNNNNN  
NNNNNNNNNNNNNNNNNNNNNNNNNNNNNNNNNNNNNNNNNNNNNNNNNN  
-----AG  
ATGCGTACATTGTTGTGTTTAGTTCGTCGAGACAAGGCTGATTCTAAAC  
GAAGCAGAGTTGATCCTCGCGCTGGCCCAAGAGTTTCAGATGAGGGTGGT  
TACCGTGTCTTGGAGGAGCAAACCTTTCCCAGCATTATCCAGGTGATCA  
GCAGTGCCTCCATGCTAGTTAGTATGCATGGAGCTCAGCTCGTCACGTCT  
CTCTTTCTCCCAGAGGAGCTGCCGTGGTGGAGCTTTTTCCCTAYGCTGT

GAACCCAGAACAGTACACCCCATACAAAACCCCTTGCCTCCCTGCCAGGCA  
TGGACCTTCAGTACGTTTCGTGGAGGAACACGATGGAAGAGAACACTGTG  
GCCACCCTGAAAGACCGTGGGACCAAGGAGGTATCGCCCACTTAGACAA  
GGAAGAACAGGAGCGAATCTTAGCCAGCAAAGATGTCCCAAGGCACCTGT  
GCTGCCGCAACCCAGAGTGGCTTTTCAGGATTTACCAGGATACTCTGGTG  
GACATCCCGTCCTTCATGGAGGTCTTAA---GGAGGGTCTGAAA---AC  
GAGGCCGAGCTTGAAGAA---GTCCAAGCCGACCAGCACAGTTCACCCGG  
GACGGGTGAGAGAACCTCAGTGCCASACATCAGTCCAAGCCACTAATGAG  
GCTAAACTCACAGTATCCTGGCAGATCCCGTGGAACTTAAGTACTTAAA  
GGTGCAGAGGTGAAGTACGAGGTTTGGATCCCGAAAAAGGATCCCAGCA  
AGGGAACCCTGGAAGATCAAATCATTAGGCAAACCCTGCACTGGAGGCT  
TTTGGTAATGCCAAAACAGTGAGGAATGATAATTCTCCCGCTTTGGGAA  
ATTCATTGCAATTCACCTTTGGAAAYAAGTGGGAAGCTGTCCTCTGCGGACA  
TTGAAACGTACCTGTTGGAAAAATCCCGGGTCACTTTTCAGCTTAAGGCA  
GAGCGGAATTATCATATCTTCTTCCAGATCTTATCCAACCATAAGCCAGA  
GCTGTTGGATATGCTGTTGATCACCAACAACCCCTATGACTACTCATTCA  
TCTCCCAAGGAGAGGTGACAGTAGCGTCCATCAACGATGCAGAGGAGCTG  
ATGGCCACTGACAGTGCCTTCGATGTACTCGGCTTCACTCTAGAAGAGAA  
GTTGGGAGTCTACAAGCTGACAGGGGCTATCATGCACTACGGCAACATGA  
AGTTCAAGCAGAAGCAACGCGAGGAACAGGCTGAGCCTGATGGCACAGAG  
GCTGCTGATAAGTCAGCTTACCTAATGGGGCTGAACTCAGCTGACCTCAT  
TAAAGACTCTGTATCCAGAGTTAAGGTAGGAAATGAGTATGTAACTA  
AAGGTCAGGGTGTAGATCAAGTCTACTACCCCAACAAGAGGCCTTCAAG  
TGCGAGGAGTGTGGCAAGCACTACAACACCAAGCTGGGATACAGGCGCCA  
TGTGGCCATGCACTCCGCCACCGCAGGGGACCTCACCTGTAAAGTCTGCA  
TGCAGAGCTACGAGAGCACGCCGGTGTCTCTGGAACACCTCAAGAGCCAC  
TCGGGGAAGTCTCGGGCGGCCAAGGAGAAGAAGCACCCATGTGATCA  
CTGCGACCGTCCGTTTACACGCGGAAGGACGTGAGGCGGCACATGGTCCG  
TCCACACGGGCCGAAAGGACTTCTGTGCCAGTACTGTGCCCAACGCTTC  
GGCAGGAAGGACCACCTGACGCGACACGTGAAAAAGAGCCACTCGCAAGA  
GCTGCTGAAGATCAAGACGGAGCCTCCGGATATGTTGGGTCTCCTGGGCT  
CTGGTTCGCCTCCCTGCTCCGTCAAGGAGGAGCTGAGTCCCATGATGTGT  
AGCATGGCTCCCAATAAAGACCCGATGATGGGGAAGCCGTTTCCCAGTGG  
GACGCCCTCCCTATGGGGATGTACAACCCTCACCCAC-----CTCCAGG  
CCATGTCTAACCCTGGGGTTGGCCATCCT-----CACCCCTCCCTGATG  
CC-----C-----TATCT  
CATCTACGCCTCCTTCTCATTTCATGGGATGTTTACAGATCAGCGACGGGT  
CGAACATTGTCAACCTGCTGGCCAGCAACTCCCCGAGCGTCTCGTATGCG  
CTCACGAGCAGAAATACTTACGCAACTACAGCCCCGTCATCGGGTTTTTA  
CATCTATGAACCCATTGAGTACTGGAACTCGACGGTGCAGGAGCACCTGA  
AGACACTGAGCCACGGCTTCAACAAGATCTCCTGGATGGACAACCTTCTTC  
CAGTACCTGCGGGTGGCGAACGTGAGCGCGTCCACCAAGGCTGACTTCGT  
CACCATCCTCCGGGGCTCCTTCCCTGCGCAGCCCTGAGTACCAGCACTTCA  
CTGAGGACATCATCTTCTCCAAGA---ACCGCGAGAGCG-----ACGAG  
TACGACGTATCGCTCCCGCATGTACCTGGTGGCGCGCACCCACGGAGAA  
GAAACGCGAGGAGGTGGTGGAGCTCCTGGAGAAGCTGCGGCCATTGATGC  
TCATCAACAGCATCAAGTTCATTGCCTTCAACCCACCTTCGTCTTCATG  
GACCGTTACAGCTCCTCCGTCTGCTCGCCATCCTCACCTCTGGCTTCAG  
CGTGCTCACCATCCTCATCCTCACCTTCTTCCCTCGTCATTAACCCGCTGG  
GGAACCTTCTGGCTCATCTTGACGGTCACGTCCGTGGAGCTGGGCGTGCTG  
GGCCTCATGGGGTACCATCCATTCTAATGGCAGCCAGCTCTTAGGAACGT  
GTCACCATCCTGTATGTGGGTATCATTAATGGGCTCTCTGGATGCACCA  
CGTCTGTGGAGGACTCTCCGGTGCACACTATAACCCGTCGTTTTTCGCTAT







-----  
-----  
-----  
-----  
NNNNNNNNNNNNNNNNNNNNNNNNNNNNNNNNNNNNNNNNNNNNNGCTTGGCATGTTGTTGCTGTCTGATGCCACCAATGTA  
CCAAGCTGTCAGAGCTCTCCTGGGGCATGTGCCTGAGCAACTTCCCTGCT  
ATTTGCAAGACAGAGGACTTCTCCAAGTCCCAAAGATATGGTGGTGCA  
GCTTTTGTACATGAGGAGTTAGAGACAGAAGATGAGAGACTGGTTTATG  
AAGCTGCCCTTAAGTGGATCAACTATGACCTGGAGAGGAGGCACTGCCAC  
CTTCCAGAGCTCCTAAGAACAGTTCGCCTCGCTTTGCTGCCTGCCATCTT  
TCTGATGGAGAATGTCTCAACAGAAGAGCTGATTAATGCCAGCCCAAGA  
GCAAAGAGCTGGTGGATGAAGCTATCCGCTGTAAGCTGAAGATCCTGCAA  
AATGATGGTGTGTTAACAGCCATGTGCTCGACCAAGAAAACTAGCCA  
TGCCCTCTTTCTTCTGGGAGGGCAGACTTTCATGTGTGACAAGTTGTATC  
TGGTGGACCAGAAGGCCAAAGAGATCATAACCAAAGCTGACATTCCCAGC  
CCCAGGAAGGAGTTTAGTGCCTGTGCCATTGGCTGTAAAGTGTACATCAC  
CGGTGGGA--GAGGCTC-TGAGAAATGGTGTGTCCAAAGATGTATGGGTGT  
ACGACACTGTCCACGAGGAATGGTCCAAAGCAGCTCCCATGCTCATCGCC  
AGGTTTGGTTCATGGCTCTGCAGAGTTGAAACACTGTCTATACGTAGTAGG  
AGGTCACACTGCCCAACAGGCTGCCCTCCCGNNNNNNNNNNNNNGGATGAATACATTGTCTGTG  
TTCAGTCGTTTCGACAACAAGGCTGATAATAAATGAAGCAGAGCTTATCAT  
GGCGTTAGCACAGGAGTTCCAGATGAGAGTGGTGACAGTATCCCTGGAGG  
AACAGTCTTTTTCCAGTATCATCCAGGTGATCAGTGGTGTCTTCTATGTTA  
GTCAGCATGCACGGAGCTCAGCTTATCACTTCACTCTTCCTCCCAAGAGG  
AGCTGCTGTAGTGGAGCTATTCCCATTGCTGTGAACCCAGAGCAGTACA  
CCCCATATAAAACCCCTTGCCACCCCTCCAGGCATCGACCTACATTATATT  
TCCTGGAGGAACACTAAGGAGGAGAACACCATCACTCACCCAGACAGACC  
GTGGGAGCAAGGAGGCATCGCTCACTTGGAGAAGGAGGAACGAGAGCGAA  
TACAGGCCAGTAAAGACGTCCCCAGGCACCTGTGCTGCCGCAACCCAGAG  
TGGCTCTTCAGGATCTACCAGGACACTTTAGTCGACATCCCTTCCCTTTT  
GGAAGTTCTCAA---AGAGGGCATGAAG---GCTAAGCCAAGCTTGAAGA  
A---GACAAAGCCATCTGCTGTGCGTGACCCGGCCGGGTTAGAGAACCC  
CAATGTCAGACCTCAGTACAACCCTAATGAGGCTAAACTCACAGTCTC  
CTGGCAGATTCCCTGGAATCTGAAATATCTAAAGGTAAGAGAGGTCAAAT  
ACGAAGTGTGGATCCAGAAAAAGACACCAGCAAGGGGACACTGGAGGAT  
CAAATCATCCAGGCCAACCCCTGCTCTGGAAGCCTTCGGCAATGCCAAAAC  
GGCAAGGAATGACAACCTCATCTCGTTTTGGAAAAATTCATCCGAATACATT  
TTGGTACCAGTGGCAAACCTGTCTGCTGATATTGAGACGTATCTGCTG  
GAGAAGTCACGTGTCACCTTTCAGCTGAAGGCTGAGAGGAACTACCACAT  
CTTCTACCAGATTCTGTCCAATCAGAAGCCAGAATCCTAGACATGCTGC  
TGATCACTAACAATCCATATGACTACTCCTACATCTCCCAAGGAGAGGTC  
ACAGTTGCCTCCATCAACGACTCTGAGGAGCTGATGGCCACAGACAGCGC  
CTTCGATGTGCTCGGCTTCACTCCAGAGGAGAAGATGGGCGTCTATAAAC  
TGACCGGTGCCATCATGCACTACGGAAACATGAAGTTCAAACAGAAGCAG  
CGTGAGGAGCAGGCTGAACCTGATGGCACGGAGGCTGCTGACAAATCGGC  
TTACCTAATGGGGCTGAACTCCGCTGACCTCATCAAAGGTCTTTGCCATC  
CCAGAGTCAAAGTAGGAAATGAGTATGTTACCAAAGGCCAAAGTGTGGAT  
CAAGTCTACTANNNNNNNNNNNNNNNNNNNNNNNNNNNNNNNNNNNNNGGAAGCACTACAACACCAAGCTGG  
GATATAAGCGCCATG  
TGGCCATGCACTCTGCCACAGCAGGTGATCTCACCTGTAAAGTGTGCATG  
CAGAGCTATGAGAGTACACCTGTTCTCCTGGAGCACCTCAAGAGCCACTC  
TGGGAAGTCTTCAGGTGGGGCCAAGGAGAAAAAACACCCGTGTGACCACT  
GTGACCGGCGTTTTTACACGCGTAAGGATGTGAGACGGCACATGGTAGTA















GCTGGAGACAGAGGATGAGAGACTGGTGTATGAAGCTGCTCTAAACTGGA  
TCAACTATGACCTAGAAAAGAGGCACTGCCACCTTGCAGAGCTTCTGAGA  
ACAGTCCGCCTTGCTCTGCTGCCTGCCATCTTTCTGATGGAGAACGTTTC  
AACGGAGGAGTTGATCAATGCCCAGGCCAAGAGCAAGGACCTGGTGGATG  
AAGCAATCCACTGTAAGCTGAAGATTCTGCAGAATGATGGGGTTGTTAAC  
AGCCCATGTGCTCGACCACGAAAGACCAGCCATGCTCTGTTCCCTTCTAGG  
AGGACAGACTTTCATGTGTGACAAAATTGTACCTGGTCGACCAGAAAGCCA  
AAGAGATTATCCCCAAAGCTGACATCCCGAGCCGAGGAAGGAGTTCAGT  
GCCTGTGCGATAGGCTGTAAGGTCTACATCACTGGAGGAA--GAGGCTC-  
AGAGAACGGTGTGTCTAAAGACGTGTGGGTCTATGACACCGTCCATGAAG  
AATGGTCCAAAGCAGCTCCAATGCTCATCGCCAGGTTTGGCCATGGCTCT  
GCAGAGCTAAAGCACTGCCTGTATGTGGTAGGAGGTCACACTGCTGCAAC  
CGGCTGCCTCCCGGCATCACCATCGGGAGGACTACATTGTTGTGTTTCAGT  
CGTTCGACGACGAGGCTCATTCTGAATGAAGCAGAGCTAATAATGGCTCT  
GGCCAGGAACTCCAGATGAGAGTGGTCACCGTGTCACTGGAGGAGCAGT  
CTTTTCCAGTATTGTCCAGGTGATCAGTGGTGGCTTCCATTTTAGTCAGC  
ATGCATGGAGCCCAGCTTGTACAGTCACTCTTCCCTCCCAGGGGAGCCAC  
GGTGGTTGAGCTGTTCCCATTTGCTGTGAACCCAGAGCAGTACACACCAT  
ACAAAACACTCGCCTCCCTTCCAGGGATGGACCTTCACTATATCTCGTGG  
AGGAACACTAAGGAGGAAAACACCATCACCATCCAGACAGAGCCTGGGA  
GCAAGGAGGCATCGCTCATCTGGAGAAGGAGGAGCAGGAGAGAATCCTGG  
CCAGTAAAGAGGTTCCGAGGCACCTGTGTTGCCGCAACCCAGAGTGGCTC  
TTCAGGATCTACCAGGACACTTTGGTGGACATCCCTTCCTTGCTAGAAAT  
GCTCAA---AGAGGCCAGAAAG---ACCAAGGCCAActTCAAGAA---AT  
CCAAGCCAGCCAGCACAGTTCACCCAGGACGAGTCAGAGAAGCCAAATGT  
CAGACCTCGGTACAAACAAGGAACGAGGCTAAACTCACAGTGTCTGGCA  
GATACCNTGGAATCTAAAATNNNNNNNNNNNNNNNNNNNNNNNNNNNNNNNNNN  
NNNNNNNNNNNAAAAAAGAC  
ACGAGCAAGGGGACCTGGAGG  
ATCAGATCATCCAGGCCAACCCGGCTCTGGAGGCTTTCGGCAACGCCAAG  
ACGTCCAGAAACGACAACTCGTCTCGGTTTGGAAAATTCATTCGCATCCA  
CTTTGGCACAAGCGGCAAACCTGTCCCTCGGCAGACATCGAGACATACTTC  
TGGAAAAGTCCCGTGTACGTATCAGCTGAAGGCTGAAAGGGACTATCAT  
ATCTTCTATCAGATCCTGTCCAATCAGAAGCCGGAGCTGCTTGACATGCT  
GCTGATCACCAACAACCCCTACGACTACTCCTACATCTCCCAAGGAGAAG  
TAACGGTGGCCTCCATCAACGACTCCGAGGAGCTCATGGCTACAGACAGT  
GCCTTTGACGTGCTTGGCTTACCAGCAGAGGAGAAGACGGCTGTTTATAA  
ACTCACCGGCGCCATCATGCACTATGGAACCTGAAGTTCAAACAGAAAC  
AGCGTGAGGAGCAGGCGGAGCCTGACGGGACGGAGGCTGCTGATAAATCT  
GCTTATCTGATGGGCTGAACTCTGCCGACCTCATCAAAGGCTGTGTCA  
CCCGGAGTCAAGGTAGGAAATGAATANNNNNNNNNNNNNNNNNNNNNNNNNNN  
NNNNNNNNNNNNNNNNNNNNNNNNNNNNNNNNNNNNNNNNNNNNNNNNNN  
AAGAAGGCCTTCAAGTGTGAG  
GAGTGTGGGAAGCACTACAACACCAAGCTGGGCTACAAGCGCCACATGGC  
CATGCACTCTGCGACCGCCGGGATCTGACCTGTAAAGTGTGCATGCAGA  
GCTACGAGAGCACGCCCGTTCTCTGGAACACCTCAAGAGCCACTCTGGG  
AAATCTTCGGGAGGCGCAAGGAGAAGAAACACCCGTGTGACCACTGTGA  
CCGCCGTTTCTACACCAGGAAGGATGTGAGAAGGCACATGGTGGTCCACA  
CGGGACGAAAGGACTTCCTGTGCCAGTACTGTGCCACAGCGCTTTGGCAGG  
AAGGACCACCTGACCCGCCACGTGAAGAAGAGCCACTCGCAGGAGCTGCT  
GAAGATCAAGACGGAGCCACCAGATATGTTAGGTCCTGGCGTCTGGAT  
CACCTCCCTGCTCTGTGAAGGAGGAGCTCAGCCCCATGATGTGTGGCATG  
GGTCCCAACAAAGATCCCATGATGGGCAAGCCGTTCCCCAGTGGAGCTCC  
TTTCCCAATGGGCATGTACAACCCACACCAC-----CTCCAGGCGATGT  
CCAACACCGGGTGGGTCACCCT-----







AAATGACAACCTCATCCCGTTTTGGAAAGTTCATCCGAATTCACCTTGGTA  
CAAGCGGCAAGCTGTCATCTGCTGACATCGAAACGTACCTGCTGGAGAAG  
TCACGCGTTACCTTCCAGCTCAAGGCTGAGAGAAAATTATCACATCTTCTT  
CCAGATCCTGTCAAATCAGAAACCAGAGCTGCTGGACATGCTGCTCATCA  
CCAACAATCCCTACGACTACTCCTACATCTCCCAAGGAGAGGTAACGTGC  
GCCTCCATCAACGACTCAGAAGAGCTGATGGCCACGGACAGCGCCTTCGA  
TGTGCTCGGCTTACCCCGGAAGAGAAGATGGGCGTCTATAAACTCATAG  
GTGCCATCATGCACTATGGCAACATGAAATTCAAACAAAAGCAGCGTGAG  
GAGCAGGCCGAGCCAGATGGGACGGAGGCCGCTGATAAATCCGCTTACCT  
CATGGGGCTGAACTCTGCTGACCTCATCAAAGGGCTGTGTACCCCAGAG  
TCAAGGTAGGAAATGAATATGTCACCAAAGGCCAAAAGTGTGGATCAAGTC  
TACTACCCTAACAAGGAGGCCTTCAAATGTGATGAGTGTGGCAAGCACTA  
CAACACCAAGCTGGGATACAAGCGCCATGTTGCCATGCATTCCGGCCACGG  
CGGGGGATCTCACCTGTAAAGTGTGCATGCAGACCTACGACAGCACACCC  
ATGCTCTTGGAGCACCTGAAAAGCCACTCTGGGAAGTCCTCAAGTGGCAC  
CAAGGAGAAAAAACACCAGTGCAGCCACTGCGACCGGCGTTTTCTACACAA  
GGAAGGACGTGAGGCGCCACATGGTGGTCCACACAGGCCGAAAGGACTTC  
CTCTGTCAGTACTGTGCCAGCGCTTTGGCAGGAAGGACCATCTGACACG  
CCATGTGAAGAAGAGCCACTCGCAGGAGCTGCTGAAAATCAAGACGGAGC  
CTCCGGATATGTTAGGTCTTTTAGCTTCTGGGTACCGCCGCTGCTCCGTG  
AAGGAGGAGCTCAGCCCATGATGTGCGGTATGGGTCCCAACAAAGACCC  
CATGATGAGCAAACCCTTTCCGAGTGGGGCCCTTTTCCGATGGGCATGT  
ACAACCCTCATCAT-----CTCCAGGCCATGTCTAATTCTGGGGTAGGT  
CACTCA-----CACCCGTCCCTGATGCCACCTCTTTGTCTGCAGCTAT  
GNNNNNNNNNNNNNNNNNNNNNTACCTCATCTACGCCTCGTTCTCATTCATGGGATGTTTACAAATCAGT

G

ATGGGTCAAATATCGTGAACCTGCTGGCAAGTAACTCTCCAAGTGTTTCA  
TATGCTCTGACACAGCAAAAATACTTACAGTAACTACAGTCCAGTCATTGG  
GTTTTACATTTATGAGCCCATCGAGTACTGGAAGTGCACAGTGCAGGAGC  
ATCTGAAGACTCTGAGTCATGGCTTCAACAAGATCTCCTGGATGGACAAC  
TTTTTCCACTACCTGCGGGTGGTGAACGTGAGTGCATCAACCAAGAGCGA  
CTTCATCACCGTCTGAAGGGCTCCTTCCTGCACAGCCAGAGTACCAGC  
ACTTCACTGAGGACATCATTTTTCTCAAAGA---ACCGCGAGACCG-----  
-ACGAGTACGACATCATCGCCTCGCGGATGTACTTGGTGGCAGAGACTAC  
GGAGAACAAGCGTGAAGAGGTGGTGGAGCTCCTGGAGAAACTCCGTCCAC  
TGATGCTGATCAACAGCATCAAGTTCATTGCCTTCAATCCTACGTTTGTG  
TTCATGGACCGCTACAGCTCCTCTGTATCTCACCCATCCTGACGTCAGG  
ATTCAGCGTACTCACAATCCTCATCCTCACTTTCTTCCCTGGTCATCAACC  
CCTTGGGTAACCTTCTGGCTCATCCTCACTCTAACGTCATGGAGCTGGGC  
GTCTTGGGTTTGATGGGCTTCCACCAGTTTGAATGGCAGCCAGTCCTCAG  
GAACGTGTCTACATCTTGCAATGTGGCATTATTAACGGTCTCTCTGGAT  
GGGATTCCTCAGTGGATGACTCCCCAGCTAACACCATCGCTCGACGGTTT  
CGCTATGATGTGGCACTGGTATCAGCATTGAAGGATCTGGAGGAGGACAT  
CATGGTGGGACTGAGAGAGAACGAAATGGAAGACAATGCTTGCA-----  
GCTTCACTGTATGATCAAAGAATCCTGTGATGGCATGGGCGATGTCACT  
GAGAAGCACGGTGGAGGGCCAGCTGTCCCCGAGAAGGTCGTGCGTTTCTC  
TTTACCGTTATGTCTGTCTCTTTCCTAGCAGACAGTCAGGAG-----  
-----GAAGAGGTACCCGTCTTACAGAGCCA  
AAGCCAAACTCAGAAGTGTCTGTAAAGCCCTTTGGCCTGATGTCTGTGGA  
TGAAGCAGACCACGAGACACTCACAGCCATCCTGTGTCTGTAAATGTCAG  
AGCGCAACGCAATGAAGGAGAGCAGGCTCATCCTGTCCATTGGTGGACTT  
CCTCGTCTCTTCCGCTTTCATTTTCAAGAGGCACAGGATACGATGAGAAGAT  
GGTGCCTGAGATGGAGGGCCTCGACGCCTCTGGGTCCACCTACATTTGCA



CTTGCTGTCTTACGCAGCGGCCGAGTGAAGGCTC-----TTCCGCTGC  
CGACTGCGGGCTGCTCCAATCGGGCTCTTGGCTATTACGCAGATGCGTCA  
G---GCTGG---GGAGGACGCACGCCGCCGAATACTGTGGCGTGAACAG  
CAAGTCCANCTCGGTCTTTTTCTGCTGGCCCTCCAACACTATCGGAGGCAG  
AGCCGGA---CC---AACTACCTGG-----CCGAGGA---GGGG-  
--GACTC---GATCCCCACGGAGAGGTCACCG---AT---CGGCGGCTCG  
GAGGAG---GCCAAACCCAAAGACATCAC-----GTCGAACTG  
GATGGAG---ACGCCATCATCCATTAAGTCCATTGATTCCAGCGACTCTG  
GGATCTTTG---AACAGGCCAAAAGGAGACGGATCTCACCTTCTGCCACG  
CCG-----

CTCTCAGACACGGTGTCCCCGTNNNNNNNNNNNNNNNNNNNNNNNNNNNNNNNNNNNNNNNNNNNNNNNNNNNNNNNNNNNN  
NNNNNNNNNNNNNNNNNNNNNNNNNNNNNNNNNNNNNNNNNNNNNNNAAACCACACCTCCCTC  
GATCTTGGCTCAGG---ACAAACGGCGTTTTCTCCAGACG---CCCGG  
CTAC---GCTGCAGCCGCCCTGGGA---CACCATCA-----CCACCCGA  
CGCACGTTGGCTCT---TACTCCACGGCCGCTTTCAACTCCACCCGGGAC  
TTTCTCTTTCAGAAATCGAGGCTTCGGGGACGCCACCGG-----  
AGCGCAGCACAGTTTTGTTGCGCTC-----CGGCAGTTT---C----  
--GCGGGGCCACATGGACACTCGGATGCAGCAGGGCACCTGCTCTTCCCC  
GGGCTCCACGAG---CAAGCGGCGAGCCACGCGTCTCCAACGTGGTCAA  
CGGCCAGATGCGGCTGGGCTTCTCGGGGGACATGTACGGACGGGCAGACC  
AGTATGGCCACGTACAAGCCC GCGT---CCGACCCTACGCCCTCGACC  
CAGTTGCACGGCTACGGCCCATGAACATGAATATGGCCGCG---CACCA  
CGGGGCCGGGGCTTCTTTGATACATGAGGCAGCCGATCAAACAGGAGC  
TCATCTGCAAGTGGATCGAGCCAGAGCAGCTGGCCAACCCAAAAAGTCG  
TGCAACAAAACTTTCAGCACGATGCACGAGCTCGTGACGCATCTGACGGT  
GGAGCACGTTGGCGGACCGGAGCAGACGAACCACGCTCTGCTTCTGGGAGG  
ACTGCCCCAGGGAAGGGAATCCNNNNNNNNNNNNNNNNNNNNNNNNNNNNNNNNNNNNNNNNNNNNNNNNNNNNNNNNNNNN  
NNNNNNNNNNNNNNNNNNNNNNNNNNNNNNNNNNNNNNNNNNNNNNNNNNNNNNNNNNNNNNNNNNNNNNNNNNNNNNNNNNNN

>Hime japonicus  
AGCCTCTTAATTTCGAGCAGAGCTTAGTCAACCAGGGGCCCTTCTTGAGAGA  
CGATCAAATTTATAACGTAATTGTTACCGCACACGCATTTGTTATAATTT  
TCTTTATAGTAATACCAATTATAATTGGGGGTTTTGGCAACTGACTGATT  
CCCCAATGATCGGGGCCAGATATGGCGTTTCTCGAATAAAATAACAT  
AAGCTTCTGACTTCTTCCCCCTCTTTTCTGTTGCTACTAGCTTCTCTG  
GCGTTGAAGCTGGAGCCGGAACCGGCTGAACAGTGTACCCCCCTTAGCT  
GGGAACCTGGCACACGCCGGGCTTCTGTAGATCTGACCATCTTCTCCCT  
TCACCTAGCCGGGATCTCCTCAATCCTAGGTGCAATCAACTTTATTACTA  
CTATCATTAACATAAAACCCCCGCGATTTCTCAGTACCAGACGCCCTT  
CTAGTTTGAGCTGTTCTAATCACGGCCGCTCCTACTTCTTTCCCTCC  
CGTCTTGGCAGCAGGCATCACTATACTTCTAACAGATCGAAATCTTAATA  
CAACATTTTTTGACCCGGCAGGCGGGGAGACCCAATCCTTTATCAACAT  
CTATTCTGATTTTTTGGACACCCAGAGTTTACATCTTAATTTTACCCG  
GTTTGGGATAATCTCCCATATTGTGCGCTACTACGCCGTAAGAAAGAGC  
CCTTTGGCTACATGGGAATAGTCTGAGCCATAATAGCAATCGGGCTTCTT  
GGGTTTATTGTTTGGAGCCACCACATATTTACAGTAGGCATGGATGTCGA  
CACACGAGCCTATTCCTTGAGAGGAACCTGCACCCATCCAACCTGCTTGG  
CATGCTGCTGTTGTCAGACGCCACCAGTGCACAAAGTTGTCAGAGCTGT  
CCTGGGGTATGTGCCCTCAGCAATTTCCCTGCCATCTGCAAGACGGAGGAC  
TTCTCCAGTTGCCAAAGACATGGTAGTGCAGCTTCTGTCCCATGAGGA  
ACTGGAGACTGAAGATGAGAGACTGGTTTACGAGGCTGCCCTCAACTGGG  
TCAACTATGACCTTGAGAGGAGACACTGCCACCTGCCAGAGCTGCTGAGA  
ACCGTGCGCCTGGCCTTGCTTCCCGCTATCTTCTGATGGAGAACGTCTC  
CACAGAGGAGCTGATCAATGCCAGGCAAGAGCAAGGAGCTGGTGGACG

AGGCCATCCGCTGCAAACCTGAAGATCCTGCAGAATGACGGAGTGGTCAAC  
AGTCCCTGTGCCCCGCCAGAAAGACCAGCCACGCCCTCTTCCCTGCTGGG  
AGGACAGACCTTCATGTGTGACAAGCTATACCTGGTGGACCAGAAGGCCA  
AAGAGATCATCCCCAAGGCTGACATCCCCAGCCCCAGGAAGGAGTTCAGC  
GCCTGTGCCATCGGCTGTAAGGTCTACGTACAGGCGGGC--GGGGCTC-  
AGAGAACGGTGTGTCTAAAGACGTGTGGGTCTACGACACCGTCCATGAGG  
AGTGGTCCAAGGCAGCACCCATGCTCATTGCCAGGTTTGGCCACGGCTCT  
GCTGAGCTCAAACACTGCCTCTATGTGGTGGGAGGACACACAGCAGCCAC  
CGGCTGTCTCCAGCCTCTCCCTCTAGATGCGTACATTGTCGTGTTTCACT  
CGCTCTACAACGAGGCTGATTCTCAACGAAGCAGAGCTAATCCTGGCGCT  
GGCCAAGAGTTTCAGATGAGGGTGGTTACGGTGTCCCTGGAGGAACAAG  
CTTTCCCCAGCCTCGTCCAGGTGATCAGCGGGGCTCCATGTTGGTTAGT  
ATGCATGGAGCTCAGCTCGTACCTCACTCTTCCCTCCCTAGAGGAGCTGC  
TGTGGTGGAGCTCTTCCCTATGCTGTGAATCCAGAGCAGTACACCCCGT  
ACAAAACCCTAGCCTCCCTGCCAGGCATGGAACCTCAATATGTCTCCTGG  
AGGAACACTGTTGAGGAGAACACCGTCTCCACCCAGACAGGCCCTGGGA  
CCAAGGTGGCATTGCCACTTGGAGAAAAGAAGAACAGGAGCGTATCCTAG  
CCAGCAAGGATGTCCCCAGGCACCTTGTGCTGCCGCAACCCAGAGTGGCTC  
TTCAGGATCTACCAGGATACTCTGGTGGACATCCCCCTCCTTCATAGAAGT  
ACTTAA---AGAGGGCCTGAAG---ACAAGACCCGAGCTTGAAGAA---GT  
CCAAGCCGGCCAGCACGGTTACCCGGGCCGAGTCAGAGAACCCAGTGC  
CAGACATCAGTCCAAGCCACAAWCGAGCCTAAGCTCACGGTGTCCGGCA  
GATCCCGTGGAAACCTTAAGTACCTGAAGGTGCGAGAAGT-AAGTACGAGG  
TGTGATCCAGGAAGAAGGATACAAGTAAGGGAACCCCTGGAGGATCAAATC  
ATTCAGGCAAACCCCTGCACTGGAGGCTTTTGGTAATGCCAAAACACTGAG  
GAACGACAACCTCCTCCCGTTTTGGGAAATTCATCCGAATTCACTTTGGAA  
CCAGTGGGAAGCTGTCTCTGCGGACATTGAGACTTACCTGCTGGAGAAA  
TCACGGGTACCTTTTCACTGAAGTCAGAGAGGAACTACCACATCTTCTT  
CCAGATCTTGTCCAATCAAAGCCAGAGCTGTTGGACATGCTGTTGATCA  
CCAACAACCCCTATGACTATTCCCTACATCTCGCAAGGAGAGGTAACGTGA  
GCATCCATCAATGATTCAGAGGAGCTGATGGCCACTGACAGTGCCTTTGA  
TGTGCTTGGTTTCACTCAAGAGGAGAAGCTGGGTGTCTACAAGTTGACGG  
GGGCTATCATGCACATATGGCAACATGAGGTTCAAGCAGAAGCAACGCGAG  
GAGCAGGCTGAACCTGATGGCACAGAGGCCGCTGATAAATCAGCCTACCT  
AATGGGGCTGAATTCAGCTGATCTCATCAAAGGACTCTGCCATCCCAGAG  
TCAAGGTAGGAAATGAGTATGTTACCAAAGGCCAGGGTGTAGATCAAGTC  
TACTACCCCAACAAGGAGGCTTTCAAGTGTGAGGAGTGTGGGAAGCACTA  
CAACACCAAGCTGGGATATAAGCGCCATGTGGCCATGCACTCCGCCACCG  
CTGGTGACCTCACCTGTAAAGTGTGCATGCAGAGCTATGAGAGCACGCCT  
GTTCTCCTGGAGCACCTCAAGAGCCACTCTGGCAAGTCCTCAGGTGGAGC  
CAAGGAGAAGAAACACCCATGTGACCACTGTGACCGTCTGTTTCTACACAC  
GGAAGGATGTGAGAAGACACATGGTGGTCCACACAGGCCGGAAGGATTTT  
CTGTGCCAGTATTGTGCCAGCGCTTCGGCAGGAAGGATCACCTGACACG  
CCATGTGAAAAAGAGCCACTCGCAGGAGCTGCTGAAAATTAAGACTGAGC  
CTCCTGACATGTTAGGTCTTTTAGCTTCAGGGTCAACCGCTTGTCTGTG  
AAGGAGGAGCTCAGCCCCATGATGTGTGCCATGGGTACCAATAAAGACCC  
CATGATGGGTAAAGCTTTCCCTAGTGGGGCCCCATTTTCAATGGGCATGT  
ACAACCCCAACCAT-----CTTCAGGCCATGTCAAATCTGGGGTGGCT  
CACCCA-----CACCAACCCTGATGCCCGGCTCCCTGTCTGCAGCAAT  
GGGCATGGGCTGTACATGGAGTATCTCATCTACGCCTCWTTCTCMTTCA  
TGGGATGTTTACAAAATCAGCGACGGGTCAAACATTTGTGAACCTGCTGGCC  
AGTAACTCTCCGAGCGTYTCGTACGCTCTGACCCAGCAGAAGTACTTCAG  
CAACTACAGTCCCGTGATCGGGTCTACATCTACGAGCCCATCGAGTACT











-----  
-----  
-----  
-----  
-----  
-----  
-----  
-----  
-----  
-----

-----TCTTACACTATTGAGA  
TGGGGCCGCGGGGGCCCCAGTGGAAGAGAGCCCCAGCCGTTTTCTTGC  
TCCATAGAGGACCCACCAAGCAGACCAAATTCAAGGGCATAAAGACATA  
CATATCCTACCGGGTGACGCCAGCCACACGGGCCACCCTGTATAACGCC  
GTTACAAGCACTTTGACTGGCTGTACAACCGGCTACTGCACAAGTTTACC  
GTCATCTCCGTGCCCCACCTCCCAGAGAAGCAGGCCACCGGGCGCTTCGA  
GGAGGACTTCATCGAGAAGCGAAAACGGCGGCTGATCCTCTGGATGGATC  
ACATGACCAGCCACCCCGTCCTCTCGCAGTACGAGGGCTTCGAGCACTTC  
CTCATGTGTGCCGACGACAAGCAGTGGAAGCTGGGCAAGCGGGCGGCAGA  
GAAGGACGAGATGGTGGGCGCCACTTCATGCTCACCTTCCAGATCCCCA  
ACGAGCACCAGGACCTGCAGGACGTGGAGGAGCGGGTGGACACCTTCAAG  
GCGTTCGCCAAGAAGATGGACGACAGTGTCTGCAGCTCACTCACGTGGC  
CTCGGAGCTGGTGCGCAAGCACCTGGGCGGGTTCCGCAAAGAGTTCAGC  
GGCTGGGGAATGCTTCCAGTCCATCAGCCAGGCCCTTACCCTGGACCCA  
CCATACAGCGCTGACGCCCTGAACAACGCCATCTCCACCCCTTGTAC  
ATTCTCAAACCTGACCTCCCTGGGCTTCATCATTGGTGTGGCGTGGTTG  
GCAACCTCCTGATATCCATCCTGCTCATCAAAGACAAAAGCTTGCACAGA  
GCTCCCTACTACTTCCCTGCTGGATCTCTGCGCTTCAGACATACTGCGCTC  
CGCTATCTGTTTCCCTTCGTGTTTACCTCCGTCAAAAACGGCTCGTTGT  
GGACCTACGGCACACTCACCTGCAAAGTGATCGCTTTCCTGGGAGTCCTC  
TCCTGCTTCCACACCGCCTTCATGCTGTTCTGCATCAGCGTGACCCGGTA  
CCTGGCAATCGCCACCACCGCTTCTACACAAAACGGCTGACGTTCTGGA  
CCTGCCTGGCCGTCATCTGCATGGTGTGGACGCTGTCAGTGGCCATGGCC  
TTCCCCCGGTGCTGGACGTGGGGACGTACTCCTTCATCAAGGAGGAGGA  
CCAGTGTACCTTCCAGCACCGTTCCCTTCAGGGCCAACGACTCGCTGGGGT  
TTATGTTGCTCCTGGCCCTCATCCTCCTCGCCACGCAGCTTGTCTACCTC  
AAGCTAATATTCTTCGTCCATGACCGCAGGAAGATGAAACCAGTTCAGTT  
TGTGCCGTGCCGTCAGCCAGAAGTGGACTTTCATGGTCCCAGGGCAAGCG  
GTCAGGCAGCTGCCAAGTGGCTGGCAGGGTTCGGGCGAGGCCCGACGCCA  
CCCACCTGCTGGGGATACGGCAAAAACCAACGCAGCCGGCAGGAGGCG  
GCTACTGGTGTGGACGAGTTCAAAAACCGAGAAGAGGATCAGCAGGATGT  
TCTATGTCATGACGTTCTTCTTCTGACCCTCTGGGGGCCCTACTTGATC  
GCGTGCTACTGGAGGGTGTTCGCCCGGGTCTGGCCGTGCCTGGGGGCTA  
CCTGACGGCCCGCGTCTGGATGAGTTTTGCCAGGGGGGGTCAACCCGT  
TCATCTGCATTTTCTCCAACCGAGAGGCCAAATCCCGCTTCCACCTGGC  
GCCGGGACCGGTCTGGCACGGACC---GCAGCGTCCCCTTAGCAACAG  
CTTGCTGTCCCCGCAACAAGCCGAGGAGACCGCAGCGG---CCTCCCCG  
AGCGATGGTTTGTACCC---CTGCCAACAACCGACTGGACTTTGCCGCG  
TCGGCATAACGATGCCCGCCGCTGCTGATTTTGTGGTAACCGGGCCAC  
CCTGCTGTCTTACGCAGCTGCTGGAGTAAAAGCAC-----TTCCACTGC  
CCACTGCAGGGTGTCTCAGGCAGACCTCTGGGTATTTATGCAGATCCCTCG  
G---GATGG---GGCACGCGTACTCCGCCCCAGTACTGC-----AC  
TAAATCAAGCTCCGTTCTCCCTGCTGGCCCTCAAATTCGGTCCGGGAGTA  
GGACTGGCA---CATCTAACTACGTGG-----TGGACGA---AGGT

---GAAAC---CCTGGCAACGGAGCGATCTCCA---CT---GGGTGGAAC  
CGAAGAC---GCGAAACCAAAGACCT-----GTCGGA---ATCTAGCT  
GGATAGAG---ACACCTTCTTCCATAAAGTCAATTGATTTCGAGTGATTCT  
GGGATTTTTG---AACAGGCAAAACGGAGACGAATATCACCCCTCCGCTAC  
GCCT-----GTGTCAGAAACCTCATCCCCACTAAAAAGCGAA----  
-----ACAGGCGAAGTCACCGACAGAGAAGTTGCTTTGGGGATAAATCCG  
TTCGCTGATGGAATGGGCGCTTTTAAAATTAACCACAGTACCCACGATCT  
TGGTTCCTGG---GCAAACGGCATTACTTCGCAGGCG---CCAGGCTAC-  
--GCCGCCGCTGCCCTGGGA---CATCATCA-----TCACCCACCCAT  
GTCAGCTCC---TACTCAACAGCCGCTTCAACTCAACCCGGGACTTCTT  
GTTTCGAAATAGGGGTTTTGGAGACGCAACGAG-----CGCAC  
AGCATAGTCTGTTCCCTCCGC---AGCAGGCGGCTT---T-----GCA  
GGGCCACATGGACACTCAGATGCCACAGGACACCTGCTCTTCCCGGGACT  
TCATGAG---CAAGCAGCTAGTCACGCCACATCCAATGTTGTAAATAGTC  
AAATGCGACTGGGCTTTTCTGGAGAAATGTACGGCAGGCCAGAGCAGTAC  
GGCCATGTAACAAGCCCAAGGT---CCGATCACTATACTTCTACCCAGTT  
ACATAGCTATGGTCCCATGAACATGAATATGGCTGCT---CACCATGGGG  
CAGGGGCCTTCTTTCGGTACATGAGACAACCGATAAAACAAGAGCTCATC  
TGCAAATGGGTTGAACCGGAACAACCTGACGAACCCGAAAAAGTCTTGCAA  
CAAACTTTTTAGTACAATGCACGAACTAGTTACTCATCTCACAGTGGAAC  
ACGTTGGGGACCTGAACAGTCGAATCATATTTGTTTTTGGGAAGAGTGT  
CCAAGGAAGGAAAACCTTTTAAAGCCAAGTACAACTTGTAAACCATAT  
TAGAGTGCACACTGGCGAGAAACCGTTTCCATGTCCATTCCCTGGCTGTG  
GGAAA

>Histiophryne cryptacanthus

AGTCTACTAATCCGCTCAGAACTAAGCCAGCCGGGCGCATTACTTGGAGA  
TGACCAGATTTACAATGTCATCGTTACAGCACACGCCTTTGTAATGATCT  
TCTTCATAGTTATGCCGATCATGATCGGGGCTTTGGCAACTGACTCATC  
CCCCAATAATCGGCGCCCCAGACATAGCCTTCCCCCGAATAAACAACAT  
AAGCTTCTGGCTTCTCCCCCATCTTTCCTCTTACTTCTTGCATCCTCAG  
GAGTCGAAGCAGGAGCAGGAACAGGCTGAACTGTTTACCCCCCTCTCGCT  
GGCAACTTAGCCCATGCCGGAGCCTCCGTTGACCTACCATCTTCTCCCT  
TCACCTAGCAGGAGTCTCCTCTATCCTGGGAGCAATTAACCTTTATTACCA  
CCATCATCAACATAAAGCCCCCTGCCATCACACAATACCACACCCCTTA  
TTTTGTTGAGCCGTAAGTAAACCGCAGTCTTACTCCTCCTCTCCCTTCC  
AGTTCTCGCTGCTGGAATTACAATGTCCTCACCGATCGAAACCTGAATA  
CCACCTTCTTTGACCCTGTGCGAGGAGGAGACCCCATCCTTTATCAACAC  
CTCTTCTGATTTTTTGG-----  
-----  
-----

-----TTTCTAGAGAGAAACCTTACCCATCCAACCTGCCTTGG  
GATGCTGTTGCTGTCAGATGCACACCAGTGCACCAAGCTATCCGAGCTGT  
CCTGGGGCATGTGCCCTCAGCAACTTTCCTGCTATTTGCAAGACTGATGAC  
TTTCTCCAACCTGCCAAAAGATATGGTGGTGCAGCTTTTGTACACGAGGA  
GTTAGAGACTGAAGATGAGAGACTTGTTTATGAAGCTGCCCTCAACTGGA  
TCAACTACGACCTGGAAAAGAGGCAGGGTCACCTTCCAGAACTTTTGAGA  
ACAGTCCGACTGGCTTTGTTACCTGCTATCTTTCTCATGGAGAACGTCTC  
TACAGAAGAGCTGATCAATTCCAACCCAAGAGCAAGGAATTGGTGGATG  
AAGCCATCCGTTGTAACTGAAGATCTTGCAGAATGATGGTGTGTTAAC  
AGTCCATGTGCTCGACCAAGAAAAACAGCCATGCTTTTTTCTTCTGGG  
TGGGCAGACATTCATGTGTGACAAGTTGTACCTGGTGGACCAGAAAAGCCA  
AAGAGATCATCCAAAAGCTGACATTTCCAGCCCCAGGAAGGAGTTTAGC







CTGGGTGTGCTTTCTTGTTCACACGGCGTTTATGCTGTTCTGCGTCAG  
CGTCACGCGCTACCTGGCCATCGCGCATCACCGTTCTACACCAAGAGGT  
TGACCTTCTGGACCTGCCTGGCCGTCATCTGCATGGTGTGGACGTTGTCG  
GTGGCCATGGCGTTCCTCCTGCTGGACGTAGGGACGTACTCGTTTAT  
CCGCGAGGAGGACCAGTGCACCTTCCAGCACCGCTCGTTCAGGGCGAACG  
ATTGCTGGGCTTCATGCTCCTGCTGGCGCTCATCCTCCTGGCCACACAG  
CTGGTTTACCTCAAGCTCATCTTCTTCGTTACAGACCGCCGAAAGATGAA  
GCCTGTCCAGTTTCGTCCTGCTGTCAGCCAGAATTGGACCTTCCACGGGC  
CAGGCGCCAGTGGGCAGGCAGCGGCCAAGCTGGTGGCCGGGTTCGGTCGA  
GGTCCAACCCCGCTACCTTGTGGGCATTCCGCAGAACAGTAACGCGGC  
GGGCCGAGCGTCTGCTGGTGTGGATGAGTTTAAAACGAGAAGAGGA  
TTAGTAGGATGTTCTACATCATGACGTTTTTCTTCCCTGGCGCTGTGGGG  
CCCTACCTGGTTCGCTGCTACTGGCGGGTGTGGCGAGGGGGCCCGTGGT  
TCCTGGGGGGCTACCTGACGGCGCCGTGTGGATGAGCTTGGCCAGGCTG  
GGGTCAATCCTTTCATCTGCATCTTCTCCAACAGGGAGGCCAAAATCTCGC  
TTTACCTGGCATGGGACTGGTCTGGCACGGAGC---GCAGCGTCCC  
ACTCGGCAACAGCTTGTATCCCCGAGCAAACCGAGGAGCCACTGTTG  
CCACCCCGCAGCGATGGTTTGTCCACCC---CTGCCAACAACCGACTG  
GACTTGTGCTGCCTCGGCATACGAAGCCGCC-----GATTTGCGCCGG  
TAACGCGGCCACCTTGTCTCTACGCAGCGCCGGAGTAAAGGCTC---  
---TTCCCTGCCGACTGCAGGCTGCTCCAATCGGCCTCTTGGCTATTAC  
GCAGACCCGTGAG---GCTGG---GGGGACGTACGCCCGCGAGTACTG  
TGGCGTGAATAGCAAATCCAGTTTCGGTCTTTTCTTGTGCGCCCTCTAACA  
CTATCGGAGGCAGAGTGGGCA---CC---AATTACCTGG-----CT  
GAGGA---GGGA---GACTC---TATCCCCAGGAGAGGTCACCG---AT  
---CGGCGCGTCCGGAGGAG---ACCAAACCCAAAGACATCAC---GTCAG  
A---GTCGAATTGGATAGAG---ACGCCGTCCTCTATTAAATCAATCGAT  
TCGAGTGATTCTGGAATCTTTG---AACAGGCCAAAAGGAGAAGAATTTCT  
ACCTTCTGCAACGCCA-----GCCTCAGAGACAGTGTCCCGTTAA  
NNNNNNNNNATCACTCAACAGGCGAAGTACAGAGAGAGAAGTGGCGTTGGGGATAAA  
TCCGTTGCGCGATGGGATGGGCGCCTTCAAATAAACACAGCTCTCAGG  
ATATTGGCTCCCG---ACAAACGGCGTTTTTCTCCTCCAGACG---CCCGGC  
TAC---GCAGCGCCCGCCCTGGGA---CACCACCA-----CCACCCGAC  
TCACGTTGGCTCT---TACTCCACGGCTGCTTTCAACTCCACAGGGACT  
TTCTCTCAGAAATAGAGGATTTCGGGGATGCCACCGG-----A  
GCGCAGCACAGTTTGTTCGCGTC-----CGGGAGTTT---C-----  
---GCAGGGCCACATGGACACACAGATGCAGCGGGGACCTGCTCTTCCCCG  
GGCTCCACGAG---CAAGCGCGACCCACGCGTCTTCCAACGTGGTCAAC  
AGCCAGATGCGACTGGGCTTCTCGGGGACATGTACGGACGGGCCGACCA  
ATACGGCCACGTTACAAGCCCGCGGT---CCGACCACTATGCTTCGACCC  
AGTTACACGGCTACGGCCCTATGAACATGAATATGGCCGCA---CACCAC  
GGAGCCGGGGCCTTTTTCGATATATGAGGCAGCCGATCAAACAAGAGCT  
CATCTGCAAGTGGGTCGAGCCGGAGCAGCTGACAAAATCCCAAAAAGTCTT  
GCAACAAAACTTTTAGCAGATGCACGAGCTCGTGACCCATCTGACGGTG  
GAGCACGTGGTGGACCGGAGCAGACGAACCACGCTGCGCTCTGGGAAGA  
CTGCTCAGAGAAGGGAAGCCATTCAAAGCCAANNNNNNNNNNNNNNNNNNNNNNNN  
NNNNNNNNNNNNNNNNNNNNNNNNNNNNNNNNNNNNNNNNNNNNNNNNNNNN  
>Histiopterus typus  
AGCCTACTCATTCGGGCAGAACTTAGCCAGCCCGGCGCCCTCTTGGGGGA  
CGACCAGATTTATAATGTAATTGTTACAGCACATGCATTTGTAATAATTT  
TCTTTATAGTAATAACCAATTATGATCGGAGGATTTGGAACTGACTTCTT  
CCCCTAATAATCGGCGCCCCCGACATGGCATTTCGCCGAATAAATAACAT  
GAGCTTTTGGACTTCTCCCCCATCATTCCTCCTCCTGCTTCCCTG



AACTCTGCTGACCTCATCAAAGGGCTGTGCCATCCAGAGTCAAGGTAGG  
AAATGAATACGTCACCAAAGGCCAAAGTGTGGATCAAGTCTACTACNNNNNNNNNNNNNNNNNNNNNNNNNNNN  
NNNNNNNNNGGGA  
AGCACTACAACACCAAGCTGGGATATAAGCGCCATGTGGCCATGCACTCT  
GCCACGGCAGGGGATCTCACCTGTAAAGTGTGCATGCAGACCTACGAGAG  
CACACCCGTGCTCTTGGAGCACCTCAAGAGCCACTCCGGGAAGTCTTCGG  
GTGGCACCAGGAGAAAAAACACCCGTGCGACCACTGTGACCGTCGTTTC  
TACACGCGGAAGGATGTGAGACGGCACATGGTAGTCCACACGGGCCGAAA  
GGACTTCCTGTGCCAGTACTGTGCCAGCGCTTCGGCAGGAAGGACCATC  
TGACACGCCACGTGAAGAAGAGCCACTCGCAGGAGCTGCTGAAGATCAAG  
ACGGAGCCTCCTGATATGTTAGGTCTTTTAGCGTCGGGGTACCACCCTG  
CTCTGTGAAGGAGGAGCTCAGCCCCATGATGTGCGGCATGGGTCCCAACA  
AAGACCCCATGATGGGCAAACCGTTCGCCAGTGGGGCCCCCTTCGCGATG  
GGCATGTACAACCCCCACCAT-----CTCCAGGCCATGTCTAATTCTGG  
GGTGGGTACCCA-----CACCCGTCCCTGATGCCAGTTCCCTTGTCTG  
CAGCTATGGGCATGGGCTGCCACANNNNNNNNNNNNNNNNNNNNNNNNNNNNNNNNNNNNNNNNNNNNNNN  
NNNNNNNNNNNNNNNNNNNNNGTGAATCTGCTGGCTAGTAACTCTCC  
GAGTGTTCGTATGCTCTGACCCAGCAGAAATACTTCAGTAACTACAGTC  
CCGTGATTGGGTTTTACATTTACGAGCCCATCGAGTACTGGAACCAACG  
GTGCAGGAGCACCTGAAGACTCTGAGTCATGGATTCAATAAGATCTCCTG  
GATGGACAACTTTTTCCACTACCTGCGGGTGGTGAATGTGAGTGCGTCAA  
CCAAGAGCGACTTCATCACCATCCTCAAGGGTCCCTCCTGCGCAGCCCG  
GAGTACCAGCACTTCACTGAGGACATCATATTTCCAAGA---ACGCGA  
GACTG-----ATGAGTACGACATTATCGCCTCACGGATGTAAGTGGTGG  
CGCGGACGACAGAGAAGAAGCGTGAAGAGGTGGTGGAGCTTCTGGAGAAG  
CTTCGTCCGTTGATGCTGATCAACAGCATCAAGTTCATTGCCTTCAATCC  
TACGTTTTGTGTTTCATGGACCCTACAGCTCCTCTGTCATCTCGCCCATCC  
TGACCTCAGGCTTCAGCGTACTCACAATCCTCATCCTCACTTTCTTCCTG  
GTCAATCAACCCCTTGGAAACTTCTGNNNNNNNNNNNNNNNNNNNNNNNNNNNNNNNNNNNNNNNNNNN  
NNNNNNNNNNNNNNNNNNNNNNNNNNNNNNNNNNNNNNNNNNNNNNNNNNNNNNNNNNNNNNNNNNNN  
TATTAAT  
GGGCTCTCTGGATGGGCTTCCTCGGTGGATGACTGCCAGCTGACACCAT  
CACTCGTCGGTTTTCGCTATGATGTGGCACTGGTGTGAGCAATAAAGGATC  
TGGAGGAGGACATCATGGAGGGCTGAGAGAGAGTGGGATGGAAGACAGT  
ACGTGCACCTCGGGCTTCAGTGTGATCAAGGAATCTTGTGATGGCAT  
GGGCGATGTCAGCGAGAAGCACGGTGGAGGACCAGTTGTTCTGAGAAGG  
CGGTACGTTTTCTTCACTGTTATGTCTGTCTCTGTCTGCGCAGACGAT  
GAGGAA-----GAAGAGGTACCAT  
CTTCACAGAGCCAAAGCCAAACTCAGAAGTGTCTGTAAGCCCTTTGCC  
TGACCTTTGTGGATGAGTCAGACCATGAGACACTCACAGCCGTCCCTGGGG  
CCTATAGTTGCAGAGCGTAATGCAATGAAAGAGAGCAGGCTCATCCTATC  
CGTGGGTGGACTACCTCGCTCCTTCCGCTTTCACTTCAGAGGCACAGGAT  
ACGATGAGAAGATGGTGGCTGAGATGGAGGGCTCGAGGCCTCAGGGTCC  
TCCTATATCTGCACTCTTTGTGACTCCAGTCGGGCAGAAGCCTCTCAAAA  
CATGGTGTACTACTCGGTCACCCGAGTCATGAAGAGAACCTAGAACGTT  
ACGAAATATGGAGAACCAACCCCTTTCTGAGTCTGTAGATGAGCTGCGA  
GACAGAGTCAAAGGGTCTCTGCCAAGCCCTTCATGGAGACCCATCCCAC  
GCTGGATGCATTACACTGTGACATGGCAATGCCACTGAGTTCTACAAA  
TCTTCCAGGACGAGATCGGGGAGGTGTACCAAAAGGT---CAAC---CCC  
AGCCGGGAGGAACGGCGGAGCTGGAGGGCAGCCCTAGATAAAACAACAGG  
GAAGAAGATAAAGCTTAAACCGGTAATGAGGATGAATGGGAACCTTGCCC  
GCAGGCTAATGACCCAGGAGGCTGTGGAGGTAGTGTGCGAGCTGGTGGCC  
TCAGAGGGAAGGAGGGAGGCCCTGAGGGAGCTTATGAGGCTCTACCTCCA





GTTCGCCAGCATCGTTCAGGCGATCAGCGGGGCGTCCATGCTGGTCAGCG  
TCCATGGAGCCCAGCTGATCAGCTCCCTGTTCTGCCGCGTGGCGCTGCC  
GTGGTGGAGCTCTTCCCCTACGCCGTCAACCCGGAGCAGTACACTCCGTA  
CAAAACCCTGGCTCTGTTACCAGGCATGGACCTCCAGTACGTGGCTTGGA  
GGAACACCATGGAGCAGAACTCGGTGGCCTACCCCGAGCGCGCTGGGAC  
CAGGGTGGCATCGCCACCTGGAGAAGGAGGAGCAGGAGCGCATCCTGGC  
GAGCGACGAGGTGCCGCGCACCTGTGCTGCCGCAACCCGGAGTGGCTCT  
TCCGGATTTACCAGGACACCCAGGTGGACGTCCCTCCTTGCTGGAGGTC  
CTCCG---AGAAAATCTGAAG---GCCAAGCCTAACCTGAGAAA---GGC  
CAAGGCAGCTAGTACAGTACACCCGGTAGAGTCAGGGAGCCCAAGTGCC  
AGACCTCGGTCCAGGCCACCAACGAGGCCAAGCTGACAGTGTCTGGCAG  
ATCCCTGGAACCTCAAATACCTGAAGGTCCGGGAGGTCAA-----  
-----AAGAAGGATGCCAGCAAAGGGACCTTGGAGGATCAAATCA  
TTCAAGCTAACCCAGCACTGGAGGCTTTTGGCAATGCCAAAACAGTGAGA  
AATGACAACCTCCTCACGCTTTGGGAAGTTCATTCGTATTTCATTTTGGAA  
GAGCGGCAAACCTCCTCTGCTGACATAGAACTTACTTGCTTGAGAAAT  
CCCGTGTGACCTTTCAGCTCAAATCGGAGAGGAACTACCACATCTTCTTC  
CAGATATTGTCCAATGAAAAGCCAGAGCTGCTGGACATGCTGTTGATTAC  
CAACAACCTTATGATTATTGCTTCATCTCCCAAGGAGAAGTAACAGTTA  
AATCTATCAATGACAGTGAGGAGTTGCTTGCCACTGACAGTGCCTTTGAT  
GTGCTTGGCTTCACTCCAGAGGAGAAGATGGGGATCTATAAGTTGACAGG  
TGCCATTATGCACTATGGCAACATGAAGTTCAAGCAGAAGCAGCGTGAGG  
AGCAGGCAGAGCCTGATGGCACTGAGGCAGCTGACAAGTCAGCCTACCTG  
ATGGGGCTTAACTCTGCTGATCTTGTGAAGGGACTCTGCCATCCCAGGGT  
CAAAGTCGGCAATGAGTATGTAACAAAGGGACAAGGTGTAGATCAAGTCT  
ATTACCCCAACAAGGAGGCCCTTCAAGTGCGAGGAGTGCGGCAAGCACTAC  
AACACCAAGCTGGGCTACAAGCGGCACGTGGCCATGCACTCGGCCACGGC  
GGGCGACCTCACCTGCAAGGTGTGCCCTGCAGAGCTACGAGAGCACGCCGG  
CGCTGCTGGAGCACCTCAAGAGCCACTCGGGCAAGTCGTGGGCGGCGCC  
AAGGAGAAGAAGCACCCGTGCGACCCTGCGACCGCCGCTTCTACACGCG  
CAAGGACGTGCGCCGCCACATGGTGGTGCACACGGGCCGCAAGGACTTCC  
TGTGCCAGTACTGCGCGCAGCGCTTCGGCCGCAAGGACCACCTGACGCGC  
CACGTCAAGAAGAGCCACTCGCAGGAGCTGCTGAAGATCAAGACGGAGCC  
TCCGGACATGCTGGGCCCTGCTGGGCTCGGGCTCGCCGCCCTGCGCCATCA  
AGGAGGAGCTCAGCCCCATGATGTGCAGCATGGGCCCGGCAAGGACCCC  
ATGATGGCCAAGCCCTTCCCAGCGGCACCCCTTCCCATGGGCATGTA  
CAACCCCAACAC-----CTCCAGGCCATGTCCAACCCCGGAGTGGGCC  
AC-----CACCCTCCCTGGTGCCCGGCTCCCTGTGCGCCGCCATG  
GGGATGGGCTGCCACATGGAGTACCTGATTTACGCTTCCTTCTCGTTCAT  
GGGATGTTTACAAATCAGCGACGGATCCAACATAGTCAACCTTTTGGCCA  
GCGACTCGCCGAGCGTGTCTGATGCTCTGACCCAGCAGAAGTATTTACG  
AACTACAGCCCAGTGATAGGGTTCTACATCTATGAGCCATTGACTACTG  
GAACGCCACTGTGCAGGAGCACCTCAAGACACTGGGCCAGGGGTCAATA  
CGATATCGTGGATCGATAATTACTTTCAGTATCTGAAGGTGACGAACGTC  
AGCGGTCGACCAAAAGCGACTTCATCGCCGTCTCAAGACCTCGTTCCT  
GAGGAGTCCCGAGTATCAGCACTTCACGGACGACATCATCTTCTCCAAA  
---CGGGG-----ACGACTTCAACATCATCGCGTCCAGGATG  
TACCTGGTGGCGCGGACCACGGAGAAGACCCGGGAGGAGGTGGTGGAGCT  
GCTGGAGAGGCTCCGCCCTCTCTCGCTCATCAACAGCATCAAGTTCATCG  
TGTTCAACCCACCTTCGTGTTTCATGGACCGCTACAGCTCCTCGGTGGTC  
TCGCCATCATGACGTCGGGTTTCAGCGTCTGACCATCCTCGTGTCTAC  
GTTCTTCTCGTGTCAACCCCTGGGAACTTCTGGTTGATACTGACCG  
TCACCTCAGTGGAGCTGGGGTCTGGGCCTGATG-----

-----TCCTACAC  
CATAGAGATGGGCCCAAGAGGGCCTCAGTGGAAGGAGAGTCCCCAGCCTT  
TCGCTTGCTCTATCGAGGACCCCACTAAGCAAACCAAGTTCAAGGGGATT  
AAGACTTACATATCGTATCGCGTGACTCCCAGCCACGTCGGCCGGCCTGT  
GTACCGTCGCTACAAGCACTTCGACTGGCTGTATAACAGGTTGCTGCACA  
AATTCACCGTCATCTCTGTGCCCCATCTGCCCGAGAAGCAGGGCACC  
CGTTTCGAGGAGGACTTTATCGAAAAGCGTAAGAGGGCGGTCATCCTCTG  
GATGGACCACATGACCAGTCAACCCCGTCCTCTCGCAGTACGAGGGCTTCG  
AGCACTTCTTCATGTGCGGSGACGATAAACAGTGGAAGCTGGGCAAGCGG  
AGGGCGGAGAAGGACGAGATGGTGGGAGCCCACTTCATGCTCACCTTCCA  
GATCCCCAACGAGCACCAGGACCTGCAGGACGTGGAGGAGCGGGTGGACT  
CCTTCAAGGCCTTCGCCAAGAAGATGGACGACAGCGTCATGCAGTTGACG  
CACGTGGCCTCAGAGCTGGTGCCAAACACCTGGGAGGGTTCCGCAAAGA  
GTTCCAAAGGCTGGGGAAGTCTCCAGTCCATCAGCCAGGCTTTCATGC  
TGGACCCCCCTACAGTCCGACGCCCTGAATAACGCCATCTCCCAC---

-----  
-----  
-----  
-----  
-----  
-----  
-----  
-----  
-----  
-----  
-----  
-----GCCAAATCCCGCTTTC  
ACCATGGCGTCGGCACGGGGCCTGGCACGGACC---GCAGCGTCCCCTC  
---AACAGCTTGCTCTCCCGCAACAACCGATGAGACCGCAGTGG---C  
CTCCCGCAGCGATGGTTTTGTACCC---CTGCCAACAACCGACTGGACT  
TTGCCGCTTCGGCATAACGATGCCGCCGCTGCAGCTGATTTTGCCGGTAAC  
GCGGCCACCCTTCTGTCGTACGCAGCTGCCGGAGTGAAAGCGC-----T  
CCCCTGCCACTGCAGGCTGCTCCAACAGGGCCCTGGGCTATTACGCGG  
AACCGCCAG---GGTGG---GGCACACGCACTCCACCGCAGTACTGT---  
-----AGTAAATCAAGCGCGGTTCTCTCATGCTGGCCCGCAATTCCGT  
TGGGTGCAGAACATCCA---CCTCCAATTACCTGG---TTGGCTTGGACG  
A---CGGG---GACGC---TATCGCACCTGAGAGGTCACCT---CT---C  
GGGGGGCAGACGAA---GCCAAGCCAAAAGACCT-----GTCGGA---  
GTCAAGCTGGATAGAG---ACCCCGTCTTCAATTAAGTCAATCGACTCAA  
GTGATTCTGGGATCTTTG---AGCAGGCCAAACGGAGGAGGATTTGCCA  
TCTGCTACACCG-----GTTTCAGAGACGTCGTCCCATTAAAATC  
AGAA-----ACAGGCGAAGTCACAGACAGAGAAGTGGCTTTAGGGA  
TAAATCCATTTCGCCGACGGGATGGGCGTTTTCAAAATCAACCACAGCTCC  
CACGATATTGGCTCTGG---TCAAACGGCGTTTGCCTCGCAGGCG---CC  
CGGCTAC---GCAGCCGCTGCCCTGGGA---CACCATCA-----CCACC  
CAACACATGTCAGCTCC---TACTCCACCGCGGCGTTCAACTCCACCCGG  
GACTTTCTCTTTTCGGAATCGGGGATTTCGGAGACGCCTCTAG-----  
---CGCGCAGCACAGTCTCTTCGCTCAGC---TGCGGGAAGTTT---C-  
-----GCTGGGCCACATGGACACACCGATGCCACGGGACACCTGCTCTTC  
TCGGGACTGCACGAG---CAAGCGGCGACCCACGCGTCTTCGAACGCGGT  
GAACAGTCAGATGCGCCTGGGCTTTTCGGGGGACATGTACGGCAGAGCCG  
AGCAGTATGGTCACGTAACGAGCCCCCGGT---CCGAGCACTACGCTTCG  
ACTCAGTTGCACGGCTACGGCCCCATGAACATGAATATGGCTGCC---CA  
CCACGGGGCAGGGGCCTTCTTCCGTTACATGAGGCAGCCGATCAAACAAG  
AGCTCATCTGCAAGTGGGTGCAACCAGAGCAGCTGTGCAATCCGAAAAG  
TCCTGCAACAAAACCTTTCAGCACGATGCATGAGCTCGTGACCCACCTCAC  
AGTGGAACATGTCCGGGGACCGGAACAGTCGAATCACATTTGCTTTTGGG  
AAGAGTGTCCGCGAGAAGGGAAACCATTTAAAGCCAAGTACAAACTTGTA  
AATCATATCAGAGTGCACACCGGA-----  
-----

>Hoplostethus atlanticus  
AGCTTACTCATCCGAGCTGAGCTTAGCCAACCTGGGGCGCTCTTAGGAGA  
CGACCAGATTTACAATGTTATTGTTACAGCACATGCCTTTGTAATAATTT  
TCTTTATAGTAATAACCAATTATGATCGGTGGTTTTGGGAACTGACTTGTT  
CCCTTAATGATTGGAGCTCCTGATATAGCATTTCCTCGAATAAATAATAT  
GAGCTTTTGACTCCTCCCCCTTCATTCCTTCTCCTCCTTTCTCCTCCG  
GAGTTGAAGCAGGGGGCCGGAACAGGATGAACAGTTTACCCGCCCCCTCGCA  
GGAAACCTCGCCCACGCAGGGGCTCCGTAGACCTAACCATCTTCTCCTT  
ACATCTGGCAGGTGTTTCTCAATTCGGGGGCCATTAACCTTCATTACAA  
CCATTATTAATATGAAGCCTCCAGCCATTTCCCAGTATCAAACCCCCCTG  
TTCGTATGATCCGTTTTAATTACAGCAGTCTCCTCCTTTTATCCCCTCC



CGTCCTTGCAGCCGGCATCACCATGCTCCTTACAGACCGAAACCTAAATA  
CAACCTTCTTTGATCCCGCAGGAGGAGACCCCATTTTATAACCAACAC  
CTGTTCTGATTCTTTGGCCACCCC-----  
-----  
-----

-----TTTCTAGAGAGAAACCTTCATCCATCTAACTGCCCTGGG  
CATGCTGTTGCTGTCTGATGCACACCAGTGTACCAAGCTATCAGAGCTCT  
CCTGGGGCATGTGCCCTCAGCAACTTTCCGGCTATTTGCAAGACAGAGGAC  
TTCTCCAGCTGCCCAAAGACATGGTGGTGCAGCTTCTATCCCATGAGGA  
GCTGGAGACAGAAGATGAGAGACTGGTTTATGAAGCTGCCCTTAACTGGG  
TCAACTATGACCTGGAAAGGAGGCACTGCCATCTGCCAGAGCTGCTGAGA  
ACGGTTCGCCTGGCCCTGCTACCTGCCATCTTCCCTCATGGAGAATGTCTC  
TACAGAAGAGCTGATCAATGCCAGGCCAAGAGCAAGGAGCTGGTGGATG  
AGGCCATCCGCTGCAAGCTAAAGATCTTGCAGAATGACGGCGTGGTTAAC  
AGCCCCGTGTGCTCGGCCGAGAAAAACCAGCCATGCCCTTTTTCTGTTGGG  
AGGTCAGACCTTCATGTGTGACAAGCTGTATCTGGTGGACCAGAAGGCAA  
AAGAGATCATCCCCAAGGCTGACATCCCCAGCCCTAGGAAGGAGTTCAGT  
GCCTGCGCCATCGGCTGTAAGGTCTACATCACAGGTGGCA--GAGGCTC-  
AGAAAAATGGTGTGTCTAAAGATGTATGGGTCTATGACACCGTCCAAGAGG  
AATGGTCCAAGGCAGCGCCCATGCTCATCGCCAGATTTGGTCCACGGCTCT  
GCTGAGCTGAAACACTGCCTTTACGTAGTAGGAGGTCACACGGCAGCAAC  
CGGCTGCCTCCCAGCCTCTCCCTCCGGATGAATACATTTGTAGTGTTCAGC  
CGTTCATCAACAAGGCTGATTCTGAACGAAGCGGAGGTAATCATGACGCT  
GGCCAGGAATTTTCAGATGAGAGTGGTTACGGTCTCCCTAGAGGAACAAA  
CTTTCCCCAGCATCGCCAGGTGATCAGTGGGGCTCCATGTTAGTCAGC  
ATGCATGGAGCTCAGCTTGTACCTCACTCTTCCCTCCCAGAGGAGCTGC  
TGTGGTGGAGCTGTTCCCTATGCTGTCAACCCAGAACAGTACACCCCAT  
ATAAAACCTCGCCTCCCTACCAGGCATGGACCTTCAATATGTTTCCCTGG  
AGGAACACTGTAGAAGAGAACACTGTCACCCACCCAGACAGATCCTGGGA  
AGAAGGAGGCATCGCCATTTGGAAAAGGACGAGCAAGAGCGAATACTGG  
CCAGCAAGGATGTCCCAGACACCTGTGCTGCCGCAACCCAGAGTGGCTC  
TTCCGAATCTACCAGGACACTYTTGGTGGACATCCCTTCATTCCCTGGAGGT  
CCTCAA---AGAGGGCCTGAAG---ACCAGGCCAGYTTGAAGAA---GG  
CCAAGCTGGCCAGCACGGTTCATCCAGGCCGGGTGAGAGAACCCAGTGC  
CACACCTCAGTCCAAGCCACCAACGAGGCTAAACTCACGGTTTCCCTGGCA  
GATCCCATGGAATCTGAAATACCTGAAGGTGAGAGAAGTGAAGTACGAGG  
TGTGGATCCAGAAGAAGGATACCGACAAGGGGACACTGGGGGATCAAATC  
ATCCAGGCAAACCCCTGCGCTGGAGGCTTTTGGTAACGCCAAAACAGTGAG  
GAATGACAACCTCATCCCGTTTTTGGAAAATTCATCCGAATTCACCTTGGAA  
CCAGTGGCAAGCTGTCCCTGTCTGATATTGAAACTTACCTATTGGAGAAG  
TCACGTGTCACCTTTCAGCTCAAGGCTGAGAGGAACTACCACATCTTCTT  
CCAGATATTGTCCAATCAGAAGCCAGAGCTGTTGGACATGATGTTGATCA  
CCAACAACCCATATGACTACTCCTACATCTCCCAAGGAGAGGTAACAGTA  
GCATCCATCAATGACTCAGAGGAGCTGATGGCCACTGACAGCGCCTTTGA  
CGTGCTTGGCTTTACTCAAGAGGAGAAGATGGGAGTATATAAGCTGATTG  
GTGCCATTATGCGCTATGGCAACATGAAGTTTAAAGCAGAAGCAGCGTGAG  
GAGCAGGCTGAGCCTGACGGAACAGAGGCTGCCGATAAGTCAGCTTACCT  
TAAGGTGGTGAATTATGCAGACCTCATCAAAGGGTANAGCCATCCCAGAGT  
CAAGGTAGGAAATGAATATGTCACCAAAGGCCAAGGNNNNNNNNNNNNNNNNNNNNCCCAACAAGGAGGC  
CTTCAAGTGCAGGAGTGTGGCAAGCACTACAACCAAGCTGGGATACA  
AGCGCCATGTGGCCATGCACTCTGCCACAGCAGGGGACCTCACCTGTAAA  
GTGTGCATGCAGAGCTATGAGAGCACGCCGGTGTCTCTGGAGCACCTTAA

GAGCCACTCGGGGAAGTCCTCGGGCGGGCCCAAGGAGAAGAAACACCCAT  
GCGACCACTGCGACCGCCGTTTCTACACAAGGAAGGATGTGAGACGGCAC  
ATGGTGGTCCACACGGGCGGAAAAGACTTCTGTGCCAGTACTGCGCCCA  
GCGCTTCGGCAGGAAGACCACCTGACACGCCACGTAAAGAAGAGCCACT  
CGCAGGAGCTGCTGAAGATCAAGACAGAGCCTCCAGATATGTTAGGTCTT  
TTAGGTTCTGGCTCGCCGCCGTGCTCTGTCAAGGAGGAGCTTAGCCCTAT  
GATGTGCAGCATGGGTCCCAACAAAGACCCCATGATGGGCAAACCCCTTCC  
CCAGTGGGACCCCTTCCCATGGGCATGTACAACCCCCACCAC-----  
CTCCAGGCCATGTCCAATTCTGGGGTGGGCCACCC-----CACCCCTC  
CCTGATGTCTGGCTCCCTGTCTGCAGCTATGGGCATGGGCTGTCACATGG  
AATATCTCATCTATGCCTCTTCTCATTTCATGGGATGTTTACAAATCAGT  
GATGGCTCAAACATTGTGAACTTGGCTGGCTAGTAACTCTCCGAGCGTTTC  
ATATGCTCTGACCCAGCAGAAATACTTCAGTAACTACAGTCCCGTGATTG  
GATTTTACATTTACGAGCCATTGAGTACTGGAACCCACAGTGCAGGAG  
CACCTTAAGACACTGAGTCATGGCTTCAACAAGATCTCCTGGATGGACAA  
CTTCTTCCACTACCTGCGGGTGGTGAACGTGAGCGCGTCGACCAAGAATG  
ACTTTATCAGCATCCTCAAGGGCTCTTTCCTGCACAGCCCGGAGTACCAG  
CACTTCACTGAGGACATCATCTTCTCCAAGA---ACCGTGAGAGTG----  
--ATGAGTATGACATTATTGCCTCGCGCATGTACCTGGTGGCGCGGACCA  
CAGAGAAGAAGCGCGAGGAGGTGGTGGAGCTTCTGGAGAAACTGCGTCCA  
CTGATGCTGATCAATAGCATCAAGTTCATCGCCTTCAACCCACCTTTGT  
TTTCATGGACCGCTACAGCTCCTCAGTCATCTCGCCCATCCTGACCTCAG  
GCTTCAGCGTGCTCACCATCCTCATCCTCACTTTCTTCTGTCATCAAC  
CCCTTGGGGAACCTTCTGGCTCATCCTCACAGTTACTTCTGTGGAGCTGGG  
TGCTTGGGTTTNNNNGGCTATCATCTATTGCAATGGCAGCCGCCCCCAAGAA  
TGTGCTGCATCCTGCCATGTGGGCATTATTAATGGGCTCTCTGGATTGG  
CTGCCCTGGTGGATGACTCCCCGGCTGACACCATTACTCGACGGTTTCGC  
TACGACGTGGCCCTGGTATCAGCCTTAAAGGATCTGGAGGAGCACATCAT  
GGAGGGACTGAAAGAGTGTGGGCTGGAAGACAGTGCTTGCACCTCAGGCT  
TCAGTGTATGATCAAGGAATCTTGTGACGGCATGGGAGATGTCAGCGAG  
AAGCACGGGGGAGGGCCGATGGTCCCTGAGAAGGCTGTACGCTTCTCTAT  
TACTGTTATGTCTGTCTCTGTCTGCTGGCAGATGGAGAGGAA-----  
-----GAGGCGTTACCATCTTTACCGAGCCAAAG  
CCCAACTCAGAAGTGTCTGTAAAGCCCTAAGCCTGATGTTTGTGGATGA  
GTCAGACCATGAGACGCTCACTGCTGTCCTGGGACCTTTACTTGCAGAGC  
GTAAAGCAATGAAGCAGAGTCAACTCATCTACCTATGGGTGGCCTCCCT  
CGCTCCTTCCGCTTCCACTTCAGAGCCACAGGATATGATGAGAAGATGGT  
GCGTGACATGGAGGGCTGGAGGCCTCAGGTTCCACCTATATCTGCACTC  
TGTGTGATTCCGGTCGAGCAGAAGCCTCTCACAACATGATACTACACTCC  
ATCACCCGCAGCCACGATGAGAACCTGGATCGTTATGAAATATGGAGGAC  
CAATCCCTTTTCTGAGTCTGTTGATGAGCTGCGAGACCGGGTCAAAGGGG  
TCTCTGCCAAGCCCTTTATGGAGACACAGCCACTATTGATGCATTACAC  
TGCGACATTGGTAATGCCACAGAGTTCTACAAAATCTTCCAGGATGAGAT  
TGGGGAGGTGTACCAAGAAGT---CAAC---CCCACCCGGGAAGAACGGC  
GGAGCTGGCGAGCAGCCCTAGACAAGCACCTGAGGAAGAAGATGAAGCTT  
AAACCAGTGATGAGGATGAATGGGAACACGCCCCGGAAGCTAATGACCCA  
GGAGGCTGCGGAGGTGGTGTGTGAGCTGATACCCCTCAGAAGAGAGGAGAG  
AGGCCCTGAGGGAGCTTATGGGGCTCTACATCCAGATGAAGCCTGTGTGG  
CGCGCTACCTGCCAGCCAAGGAATGCCCTGACGAGCTGTGCCGCTACAG  
CTTTAACTCCCAGAACTTTGCCAATCTCCTCTCCACCACTTTCAAATATA  
GGTACAATGGAAAGATCACCAATTATCTGCATAAGACCCTCGCCCATGTC  
CCTGAAATCATCGAAAGAGATGGCTCTATAGGAGCCTGGGCCAGTGAGGG  
GAATGAATCAGCAACAANTCGTACACCATTGAGATGGCTCCAAAGGGGCC

CCAATGGAAGGAGAGTCCTCAGCCTTCTCCTGCTCCATTGAAGACCCCA  
CAAAACAGACCAAGTTCAAAGGCATCAAGACCTACATTTTCGTACCGGGTC  
ACACCGAGCCACACAGGGCGTCCCGTCTACAGACGCTACAAACACTTTGA  
CTGGCTGTACAACCGCTTGTGTCACAAGTTCACTGTGATCTCGGTGCCCC  
ACCTGCCTGAGAAGCAGGCCACGGGGCGCTTCGAGGAGGACTTCATCGAG  
AAGCGTAAAAGACGACTGATTCTGTGGATGAACCACATGACCAGTCACCC  
AGTCTCTCCCAGTATGAGGGATTTGAGCACTTCCCTTATGTGTGCTGACG  
ACAAGCAATGGAAGCTGGGTAAGAGGGCGGGCGGAGAAGGACGAGATGGTG  
GGCGCCACTTCATGTTGACCTTCCAGATTCCTAACGAGCATCAGGATCT  
CCAGGATGTGGAGGAGCGGGTTGACTCCTTCAAGTCCTTTGCTAAGAAAA  
TGGACGACAGCGTCAATGCAGCTCACACATGTTGCCTCGGAGCTGGTGAGA  
AAGCACCTGGGTGGATTCAGGAAGGAGTTCCAGCGGCTAGGAAATGCCTT  
CCAGTCTATCAGCCAGGCGTTCATGCTGGAACCTCCCCACAGCTCTGATG  
CCCTCAACAACGCCATCTCCACNNNNNNNNNACGTT-CTCAAACGACCTCTCTGGG  
TTTCATCATTGGAGTCGGTGTGGTCGGGAACCTCTGATCTCCATCCTGC  
TGGTCAAAGACAAGAGCCTGCACCCGCGCGCCCTACTACTTCTGCTAGAC  
CTGTGCGCCTCCGACATCCTGCGCTCTGCCATCTGCTTCCCCTTCGTCTT  
CACCTCTGTCAAGAAATGGATCCGCCTGGACCTATGGCACGCTCACCTGCA  
AAGTGATCGCCTTCTCGGCGTGTCTCCTGTTTCCACACGGCGTTCATG  
CTATTTCTGTGTACAGCTCACTCGCTACCTGGCTATTGCGCATCACCGCTT  
CTACACCAAGAGGCTGACCTTTTGGACCTGTCTAGCTGTCTATCTGCATGG  
TGTGGACGTTGTGAGTAGCCATGGCTTTTCCCCGGTGCTGGACGTAGGG  
ACGTACTCTTTTCATCCGGGAGGAGGACCAGTGCACATTCAGCACCGTTT  
TTTCAGGGCCAATGACTCACTGGGCTTCATGCTCCTGCTGGCACTCATCC  
TCCTGGCCACACAGCTGGTTTACCTCAAGCTCATCTTCTTTGTCCACGAC  
CGTCGGAAGATGAAGCCCGTCCAGTTTGTGCCTGCCGTGAGCCAGAAGT  
GACCTTCCATGGGCCAGGCGCCAGTGGGCAGGCGGCTGCTAACTGGCTCG  
CTGGATTTGGGAGAGGCCCCACCCCGCCTACCTTGTAGGCATCCGGCAG  
AACAGCAACGCGGCGGGCCGAGGCGTCTGCTGGTGCTGGATGAGTTCAA  
AACAGAGAAGAGGATTAGTAGGATGTTCTACATCATGACGTTTTTCTTCC  
TGGCGTTGTGGGGCCCTATCTGGTAGCCTGCTACTGGCGGGTATTTGCA  
AGGGGCCCGTAGTCCCGGGGGCTACCTGACGGCAGCCGTGTGGATGAG  
CTTTGCCAGGCTGGGGTCAATCCATTCATCTGCATCTTCTCTAACAGGG  
AGGCCAAATCTCGCTTTCACCCTGGCGTGGGGACTGGTCTTGGCACGGAG  
C---GCAGCGTCCCACCTCGGCAACAGCTTGTATCCCCGCAGCAAACCGA  
GGAGCCACTGTTGCCACCCCGGCGAGCGATGGTTTGTACCC---CTG  
CCAACAACCGACTGGACTTTGTGCTGCCTCGGCATAACGACGCGGCC-----  
---GATTTCCGCGGTAACGCGGCCACCTTGTGTCTTACGCAGCGGCGG  
AGTGAAGGCTC-----TTCTCTGCGGGCTGCAGGCTGCTCCAACCGGC  
CTCTTGGCTATTACGCAGACCCGTCGG---GCTGG---GGCGGACGCACT  
CCGCCGAGTACTGTAGCGTAAACAGCAAACCAAGCTCGGTCTTCTCTG  
CTGGCCCTCTAACTCTGTGCGGCGGAGAGCAGGCG---CC---AACTATC  
TGG-----CCGAGGA---CGGA---GACGC---CATCCCGACGGAG  
AGATCCCCG---AT---CGGTGGCTCCGAGGAG---ACGAAACCCAAGGA  
CCT-----GTCGGA---GTCGAGCTGGATAGAG---ACGCCGTCTCCA  
TTAAGTCAATTGATTCAAGCGATTCTGGTATCTTCG---AACAGGCCAAA  
AGGAGAAGAATCTCGCCCTCTGCCACGCCG-----GTTTCAGAAAC  
TGTGTCCCCGTTAAAATCTNNNCATCACTCAACAGGCGAAGTCACAGAGAGAG  
AAGTGGCGTTGGGGATAAATCCGTTTCGCGGACGGGATGGGGCGCTTCAA  
ATCAACCACAGCTCCACGATATCGGCTCCGG---ACAGACGGCGTTTTC  
CTCCAGGCG---CCCGGCTAC---GCAGCGGCCGCACTGGGA---CACC  
ATCA-----CCACCCGACCCACGTTGGCTCT---TACTCCACGGCGGCT  
TTCAACTCCACCCGGGACTTTCTCTTTAGAAATCGGGGTTTCGGAGACGC

CACCGG-----GGCGCAGCACAGTTTGTTCGCCTC-----  
-CGGAAGTTT---C-----GCAGGGCCACATGGACTCAGATGCCGCG  
GGACACCTGCTCTTCCCAGGACTCCACGAG---CAAGCAGCGAGCCACGC  
GTCTTCTAATGTGGTCAACAGCCAGATGCGATTGGGCTTCTCGGGGGACA  
TGTACGGTTCGGCCGACCAGTATGGCCACGTTACAAGCCCAAGGT---CC  
GACCACTATGCTTCGACCCAGTTGCACGGCTATGGCCCCATGAACATGAA  
TATGGCCGCA---CACCACGGAGCAGGGGCCTTCTTTCGATACATGAGGC  
AGCCGATCAACAAGAGCTCATCTGCAAGTGGATCGAGCCGGAGCAACTG  
ACGAATCCCAAAAAGTCGTGCAACAAAACCTTTTAGTACGATGCATGAGCT  
GGTGACCCATCTGACGGTGGAGCATGTGGGGGGACCAGAGCAGTCCAACC  
ACATCTGCTTCTGGGAAGACTGCGCCAGAGAAGGGAAACCATTCAAAGCC  
AAATACAACTTGTAATCATATCAGAGTACACACCGGAGAGAAAACCCTT  
TCCATGTCCGTTTCCC GGCTGTGGCAA

>Howella zina

-----  
-----  
-----  
-----  
-----  
-----  
-----  
-----  
-----  
-----  
-----  
-----  
-----  
-----  
-----  
-----  
-----  
-----  
-----

-----TTCCTGGAAGGAAACCTTACCCGACTAACTGCCTCGG  
CATGCTGTTGCTGCTGACGCCCACAGTGCACCAAGCTGTCAGAGCTCT  
CCTGGGCGATGTGTCTCAGCAACTTCCCCGCTATTTGCAAGACGGAGGAC  
TTCCCTCCAACCTGCCAAAGATATGGTGGTGCAGCTTCTGTACACAGAGGA  
GCTAGAGACAGAAGACGAGAGACTGGTTTATGAAGCTGCCCTAACTGGA  
TCAACTACGACCTGAAAAGAGGCACTGCAACCTCCCAGAGCTCCTGAGA  
ACGGTCCGTCTGGCCCTGCTGCCTGCCATCTTTCTCATGGAGAACGTTTC  
TACAGAAGAGCTGATCAACGCCACAGGCCAAGAGCAAGGAGCTGGTGGACG  
AAGCTATCCGCTGCAAGCTGAAGATCCTGCAGAACGATGGCGTCGTCAAC  
AGCCCGTGTGCTCGGCCGAGAAAACCAGCCATGCCCTCTTCCTTCTGGG  
AGGGCAGACGTTTATGTGTGACAAGCTGTACCTGGTGGACCAGAAAGCCA  
AAGAGATCATCCCCAAGGCTGACATACCCAGCCCAAGAAAGGAGTTCAGT  
GCCTGCGCCATTGGCTGTAAGGTGTACATCACCGGTGGCA--GAGGCTC-  
AGAGAACGGTGTGTCCAAGATGTGTGGGTCTACGACACCGTCCACGAGG  
AATGGTCAAGGCAGCACCATGCTCATCGCCAGGTTTCGGCCACGGCTTT  
GCGGAGCTGAAACACTGCCTCTACGNNNNNNNNNNNNNNNNNNNNNNNNNNN  
NNNNNGGATGAATACATTGTTGTGTTCAGT  
CGTTCGACAACGAGGCTGATACTGAATGAAGCGGAGCTAATCATGGTGCT  
GGCCAGGAGTTCCAGATGAGAGTGGTCACGGTATCCCTGGAGGAAACAGT  
CTTTCCCCAGTATCGTCCAGGTGATCAGCGGAGCTTCCATGTTAGTTCAGT  
ATGCACGGAGCTCAGCTCATCACCTCACTCTTCCCTCCCCAGAGGAGCTGC  
TGTGGTGGAGCTCTTCCCCTTTGCTGTGAACCCAGAGCAGTACACCCCGT  
ATAAAACCCTTGCCCTCGCTTCCAGGCATGGACCTTCACTATGTCTCCTGG

AGGAACACTAAGGAAGAGAACACTATCACCCACCCAGACAGACCCTGGGA  
ACAAGGGGGCATTGCTCACTTGGAGAAGGAGGAGCAAGAGCGAATACTGG  
TGAGCAAAGATGTCCCAGGCACCTGTGCTGCCGCAACCCAGAGTGGCTC  
TTCAGAATCTACCAGGACACTTTGGTGGACATCCCTTCCTTCTGGAAGT  
CCTCAA---AGAGGGCATGAAG---ACAAAGCCAGTTTGAAGAA---GT  
CAAAGCCGGCCAGCACAGTACACCCAGGCCGGGTCAGAGAACCCAGTGT  
CAGACCTCAGTACAAACACTAATGAGGCTAAACTCACAGTCTCCTGGCA  
GATCCCGTGGAACCTGAAATACCTGAAGGTGAGAGAGGTCAAATATGAAG  
TG-----AAAAAAGACACCAGCAAGGGGACGCTGGAGGATCAAATC  
ATCCAGGCGAACCCGGCAGTTGAGGCCTTTGGCAATGCCAAAACCTTGAG  
AAATGACAACCTCGTCTCGTTTTGGAAAATTCATTCGAATTCAGTTCGGTA  
TGAGCGGCAAGTTGTGCTCCGCCGACATCGAGACGTACCTGCTGGAGAAG  
TCACGTGTCACCTTTCAGCTCAAGGCTGAGAGGGACTACCATATCTTCTA  
CCAGATCCTGTCCAATCAGAAGCCAGAGCTCCTGGACATGCTGCTGATCA  
CCAACAACCCGTACGACTACTCCTACATCTCCCAAGGAGAGGTGACGGTT  
GCCTCCATCAACGACTCGGAGGAGCTGATGGCCACCGACAGTGCCTTCGA  
CGTGCTCGGCTTTACTCCAGACGAGAAGATGGGCGTCTATAAACTGACCG  
GTGCCATCATGCACTACGGAAACATGAAGTTCAAACAGAAGCAGCGTGAG  
GAGCAGGCTGAGTCCGACGGGACAGAGGCTGCTGATAAATCAGCTTACCT  
GATGGGGCTGAACTCTGCTGACCTCATCAAAGGGCTGTGCCATCCAGAG  
TCAAAGGTAGGAAATGAATATGTCACCAAAGGCCAAGGTGTGGATCAAGTC  
TACTACNNNNNNNNNNNNNNNNNNNNNNNNNNNNNNNNNGGGAAGCACTACAACACCAAGCTGGGATATA  
AGCGCCATGTTGC  
CATGCACTCGGCCACGGCAGGGGATCTCACCTGTAAAGTGTGCATGCAGA  
CCTACGAGAGCACGCCTGTGCTCTTGGAGCACCTCAAGAGCCACTCCGGG  
AAGTCTTCGGGTGGCACCAAGGAGAAAAAACACCCGTGCGATCACTGTGA  
CCGTCGCTTCTACACACGGAAGGATGTGAGAAGGCACATGGTGGTCCACA  
CGGGCCGAAAGGACTTCTGTGCCAGTACTGTGCCAGCGCTTCGGCAGG  
AAGGACCATCTGACGCGCCACGTGAAGAAGAGCCACTCGCAGGAGCTGCT  
GAAGATCAAGACGGAGCCTCCTGACATGTTAGGTCTTTTAGCGTCGGGGT  
CACCACCCTGCTCTGTGAAGGAGGAGCTCAGCCCCATGATGTGCGGCATG  
GGTCCCAACAAGACCCCATGATGGGCAAACCGTCCCCAGTGGGGCCCC  
GTTCCCGATGGGCATGTACAACCCCCACCAT-----CTCCAGGCCATGT  
CTAATCTGGGGTGGGTCACCCA-----CACCCGTCCCTGATGCCACT  
TCCTTGTCTGCAGCTATGGGCATGGGCTGCCACATGGAANNNNNNNNNNNNNNNNNNNNNNNNNNNNNNNN  
NNNNNNNNNNNNNNNNNNNNNNNNNNNNNNNNNNNNNNNNNNNNNNNNNNNNNNNNNNNNNNNNNNNN  
NNNNNNNNNNNNNNNNNNNNNNNNNNNNNNNNNNNNNNNNNNNNNNNNNNNNNNNNNNNNNNNNNNNN  
TGGCTAGTAACTCTCCGAGTGTTCGTACGCTCTGACCCAGCAGAAATAC  
TTCAGTAACTACAGTCCCGTAATTGGGTTTTACATTTACGAGCCCATAGA  
GTACTGGAACGCAACGGTGCAGGAGCACCTGAAGACTCTGAGTCATGGCT  
TCAACAAGATCTCCTGGATGGACAACTTTTTCCACTACCTGCGGGTGGTG  
AATGTGAGTGCCTCAACCAAGAGCGACTTCATCACCATCCTCAAGGGCTC  
CTTCTTGCGCAGCCCAGAGTACCAGCACTTCACCGAGGACATCATATTCT  
CCAAGA---ACCGCGAGACTG-----ATGAGTATGACATTATTGCCTCA  
CGGATGTACTTGGTGGCACGGACGACAGAGAAGAAGCGTGAAGAGGTGGT  
GGAGCTTCTGGAGAACTTCGTCCGTTGATGCTGATCAACAGCATCAAGT  
TCATTGCCTTCAATCCTACGTTTGTGTTTCATGGACCGCTACAGTTCCTCT  
GTCATCTCGCCATCCTGACCTCAGGCTTCAGCGTACTCACAATCCTCAT  
CCTCACTTTCTTTCTGGTCATCAACCCCTTGAAAACCTTCTGNNNNNNNNNNNNNNNNNNNNNNNNNNNNN  
NNNNNNNNNNNNNNNNNNNNNNNNNNNNNNNNNNNNNNNNNNNNNNNNNNNNNNNNNNNNNNNNNNNT  
CTTGCAA  
CGTCGGCATCATTAACGGGCTCTCCGGATGCTCTTCCTCGCTGGACGACT  
CCCCTGCCGACACCGTCACTCGGCGGTTTCGCTACGATGTGGCTCTGGTG  
TCGGCGATGAAGGACCTGGAGGAGGACATCATGGAGGGGCTGAGGGACAG





NNNNNNNNNNNNNNNNNNNNNNNNNNNNNNNNNNNNNNNNNNNNNNNNNNNNNNNNNNNNNNNNNNNNNNNNNNNNNNNNNNNNNNNNNN

NN-----  
-----  
-----  
-----  
-----  
-----  
-----  
-----  
-----  
-----  
-----  
-----  
-----  
-----  
-----  
-----  
-----  
-----  
-----  
-----  
-----

-----GGAGGAGTACATYGTAGTATTCAGTCGCTCAACG  
ACAAGACTCATTCTCAACGAAGCAGAACTGATTATGGCACTGTCCCAGGA  
GTTTCAGATGAGGGTCGTCACTGTGTCCCTTGAAAGAGCAACCTTCCCCA  
GTATAGTCCAGCTTATCAGTGGTGCCTCAATGTTGGTCAGTATGCATGGG  
GCTCAGCTTGTACCTCACTCTTCTCCTCCCAGAGGAGCAGTGGTGGTTGA  
GCTCTTCCCTATGCTGTGAACCCAGAACAGTACACCCCTTATAAAAACCC  
TCGCCTCCTTACCGGGGATGGACCTGCAGTACGTTCTTCTGGAGGAATACG  
ATGGAGGAAAACACCATCACCCACCCAGATAGATCCTGGGACCAAGGAGG  
CATCGCCACCTGAAAAAGGATGAGCAAGAGCGAATCCTTCCAGCAAGG  
ATGTCCCAGCGGCACCTGTGCTGCCACAACCCAGAATGGTTCTTCCGAATC  
TACCAGGACACTCTGGTGGACATCCCTTTCATTTCTGGAGGTCTCAA---  
AGATGGCCTGAAGATCACCCAGACCAAGCCTAAAAA---GGCCAAGCCAG  
CCAGCACAGTACATCCAGGCCGGGTCAGGGAAGCACAGTGTCAAACCTCA  
GTCCAAGCCACCAACGAAGCTAAACTCACGGTCTCCTGGCAGATCCCATG  
GAACCTGAAATACCTGAAGGTGAGAGAGGTCAAATACGAAGTGTGGATCC  
AGAAGAGGGACCGGAGCAAGGGGACCCCTGGAGGATCAAATCATCCAGGCC  
AACCCCGCTCTGGAGGCCTTTGGGAACGCCAAAACCATCCGCAACGACAA  
CTCGTCCCCTTTCGGGAAGTTCATCCGCATCCACTTCGGGACGAGCGGCA  
AGCTGGCGTCCGCCGACATCGAGACCTACCTGCTGGAGAAGTCGCGCATC  
ACCTTCCAGCTCAAGGCCGAGCGGAACTACCACATCTTCTTCCAGATCCT  
GTCCAACGAGAAGCCTGAGCTGCTGGAGATGCTGCTGATCACCAACAACC  
CGTACGACTACAGCTACATCTCCCAGGGGGAGGTGACGGTGGCGTCCATC  
AACGACAACGAGGAGCTGATCGCCACCGACAGCGCCTTCGACGTGCTGGA  
ATTCACCCAGGAGGAGAAGATGTCCATCTACAAGCTGACCGGCGCCATCA  
TGCACTACGGCAACATGAGGTTCAAGCAGAAGCAGCGCGAGGAGCAGGCC  
GAGCCCAGGACCGAGGAGCCGATAAGTCGGCGTACCTGATGGGGCT  
GAACTCGGCCGACCTCATCAAAGGACTCTGCCACCCCGAGTCAAGGTGG  
GAAACGAGTATGTCACGAAAGGCCAGGGTGTAGACCAAGTCTACTAC---

-----  
-----  
-----  
-----  
-----  
-----  
-----  
-----  
-----







>Hypomesus pretiosus

AGCCTCCTTATCCGAGCCGAGCTTAGCCAACCTGGCGCTCTTCTGGGGGA  
CGACCAGATTTATAATGTTATCGTCACTGCACACGCTTTTGTATAATCT  
TTTTTATGGTTATAACCAATTATGATTGGAGGGTTTGGTAACTGGCTTATC  
CCCCTTATGATCGGGGCCCCAGACATGGCATTCCCCCGTATGAACAACAT  
GAGCTTCTGACTCCTCCCTCCCTCTTTCCTTCTTCTTTTGGCCTCCTCCG  
GGGTCGAAGCAGGGGCCGGAAGTGGTTGAACAGTTTACCCTCCGCTTGCG  
GGGAATCTCGCCCATGCGGGAGCTTCCGTAGATTTGACCATTTTTTCTCT  
CCATCTTGCAGGAATCTCCTCTATTTTAGGGGCAATTAACCTTATCACAA  
CTATTATTAACATGAAACCCCTGCCATTTCCCAGTACCAGACTCCTTTA  
TTCGTTTGGGCCGTTCTAATTACAGCTGTCCTTCTTCTTTTCCCTTCC  
AGTGCTAGCTGCTGGGATTACTATGCTTCTCACAGACCGAAACCTCAACA  
CCACCTTCTTTGACCCTGCCGGGGAGGGGACCCCATCTGTACCAGCAT  
CTATTCTGATTCTTCGNNNNNNNNNNNNNNNNNNNNNNNNNNNNNNNNNNNNNN  
NNNNNNNNNNNNNNNNNNNNNNNNNNNNNNNNNNNNNNNNNNNNNNNNNNNNNN  
NNNNNNNNNNNNNNNNNNNNNNNNNNNNNNNNNNNNNNNNNNNNNNNNNNNNNN  
NN-----

-----GGACCAGTACATCGTGGTGT  
TCAGTCGTTCCCAAACCAGGCTGATCCTCAACGAGGCCGAGCTGATCCTG  
GCGTTGGCGCAGGAGTTCCAGATGAGGGTGGTGACGGTCTCCATGGAGGA  
CCAGACCTACCCCAGCATYGTGCGGGTTATMAGCGGCGCCTCCATGCTCG  
TCAGCATGCACGGAGCTCAGCTCGTCACCTCGCTCTTCCTCCCCAGAGGG  
GCGGCTGTGGTGGAGCTCTTCCCTACGCGGTGACCCCTGAGCAGTACAC  
GCCTTACAAGACTTTGGCCACCTTGCCAGGCATGGACCTCCAGTATGTCTG  
CCTGGAGGAACACCATGGAGGAGAAC TCCGTGGCTCACCCAGATAGACCC  
TGGGATCAGGGGGCATCGCTCACCTGGACAAGGACGAGCAGGAGCGCAT  
CCTGGCCAGCAGAGAGGTGCCAGACACCTTTGCTGCAGAAACCCAGAGT  
GGCTGTTCCGCATCTATCAGGACACCCGGTTGGACATCCCCTCTCTGCTG  
GACGTCCTCAG---GGAGAGCCTGAAG---ACCAGGCCAACCTCAAGAA

---GACCCGGCCTGCCAGCACTGTTTCATCCAGGCAGGGTGAGGGAGCCTC  
AGTGCCAGACCTCAGTCCAGGCTRCCAACGAAGCCAAGCTCACAGTATCC  
TGGCAGATCCCTTGGAACTCAAGTACTTGAAGGTANNNNNNNNNNNNNNNNNNNNNNNNNNNNNNNNAAGA  
GAGATCCCAG

CAAGGGAACCTTGGAGGATCAAATCATTTCAGGCTAACCTGCCTTGGAGG  
CTTTTGGTAATGCCAAAACATTGAGGAATGACAACTCGTCACGATTTGGA  
AAATTTATCCGGATTCACCTCGGAACCAGTGGCAAGCTGTCCTCAGCTGA  
CATAGAGACTTATCTTTTGGAAAAGTCACGTGTCACCTTCCAACCAAGT  
CGGAAAGGAATTACCATATTTTCTTTCAGATCTTGTCCAATAAAAAGCCA  
GAGCTGTTGGACATGCTTCTGATTACCAACAACCCATATGACTACTCGTA  
CATCTCCAAGGAGAGGTAACAGTAGCATCTATCAATGATGCTGATGAGT  
TGATGGCCACTGACAGTGCCTTTGATATCCTTGGCTTTACTCAAGAGGAG  
AAAATGGGGGTCTACAAGTTGACAGGAGCTATCATGCATTTTGGCAACAT  
GAAGTTCAAGCAAAAAGCAGCGTGAGGAGCAGGCAGAGCCTGACGGCACTG  
AGGCGGTGACAAGTCAGCTTACCTAATGGGGCTGAACTCTGCAGATCTT  
GTGAAAGGACTCTGCCATCCCAGGGTCAAGGTTGGCAATGAGTATGTCAC  
CAAAGGGCAGGGTGTAGATCAAGTCTACTACCCAAAACAAGGAGGCCCTCC  
GCTGCCAGGACTGTGGGAAGCACTACAACACCAAGCTGGGCTACAAGCGC  
CATGTGGCCATGCACTCAGCCACAGCAGGGGATCTCACCTGCAAGGTGTG  
CCTGCAGAGCTACGAGAGCACGCCGGCGCTGCTGGAGCACTTGAAGAGCC  
ATTCGGGGAAGTCGTCGGGCGGTGCTAAGGAGAAGAAGCACCCCTGCGAC  
CACTGCGACCGCCGCTTCTACACGCGCAAGGACGTACGCCGCCACATGGT  
GGTGCACACGGGCCGCAAGGACTTCCCTGTGCCAGTACTGCGCCCAGCGCT  
TTGGCAGGAAGGACCACCTCACGAGACACGTGAAGAAGAGCCACTCCAG  
GAGCTGCTGAAGATCAAGACAGAGCCGCCAGACCTGCTGGGGCTGTTGGG  
GTCTGGACC-----CATCAAGGAGGAGCTCAGCCCCATGATGT  
GCAGCATGAGCTCCACCAAGGACCCCTTATGGCCAAGCCCTTCCCGGA  
GGGACGGCTTCCCCATGGGCATGTACAACCCCCACCAC-----CTCCA  
GCCCCTGCCAGCCCCGGAGGGGGGCAC-----CACCCCTCCCTGA  
TGCCAGCTCCCTGTCTGCCGCTATGGGCATGGGCTGCCACATGGACTAT  
CTGATCTACGCTCCTTCTCCTTTATGGGGTGTCTGCAGATCAGCGACGG  
GTCCAACGTGGTCAACCTGCTGGCCACTAACTCTCCAGCGTCTCCTACG  
CCATGACGCAGCAGAAATACTTCAGCAACTACAGCCCTGTGATCGGCTTC  
TACATCTACGAGCCGATTGAGTACTGGAACCTCCACGGTGCAGGAACACCT  
GAGGACGCTGGGACAAGGCTTCAATAAGATCTCCTGGATCGATAACTACT  
TCCACTACCTGAAGGTGGTGAACGTGAGCGCCTCCACCAAGAGCGACTTC  
ATCTCCATCCTCAAAGGCTCATTCTGCAGAGCCCGAGTACCAGCACTT  
CAYGGAGGACATCATCTTCTCCAAGA---ACGGCG-----AGG  
AGTACGACATCATCGGTCCAGGATGTACCTGGTGGCCAGGACCACGGAA  
AAGACACGCGAGGAAGTGGTGGAGCTTCTGGAGAGACTCCGCCCCCTGTC  
GCTCATCAACAGYATCAAGTTCATCGTGTTCACCCACCTTCGTCTTCA  
TGGRTCGCTACATCTCCTCCGTCATCTCGCCATCCTCACCTCTAGCTTC  
AGCGTCTCACCATCCTCATCTCACCATCTTCTGGTGGTTCAGCCCCCT  
GGGAACTTCTGGCTGATCCTGACAGTGACGTGGTGGAGCTAGGCGTGC  
TAGGCTGATG-----

-----GTCAGCGAGA  
AGCACGGAGGGGGCCGGCCATTCTGAAAAGGCCGTCCGCTTCTCCTTC  
ACCGTCATGTCCGTCCTCGTCTGGCCGAGGGGGAAGAG-----  
-----GAAGCAGTCACCGTCTTCAGAGAGCAGAAGC

CCAAC TCGGAGATGTCCTGCAAACCTCTCTGTCTGATGTTTGTGGACGAG  
TCGGACCACGAGACCCTGACGGCCATCTTGGGGCCTGTGGTGGCCGAGAG  
GAACGCCATGAAGAACAGCCGCCTCATCCTGGCCATGGGCGGCCCTCCCTC  
GCTCCTTCCGCTTCCACTTCAGGGGCACAGGCTACGACGAGAAGATGGTG  
CGCGAGATGGAGGGCCTGGAGGCTTCAGGCTCCACCTACGTCTGCACCCT  
CTGCGACGCCACCAGAGCTGAGGCTCCCAGAACATGGTGCTCCACTCAG  
TCACCCGCAGCCACGACGAGAACCTGGACCGCTACGAGCTGTGGAGGACC  
AACCTTACTCTGAAATCGGCGGACGAGCTGCGAGACCGGGTAAAAGGGGT  
CTCCGCCAAGCCATTTCATGGAGACCAGCCACATTTGGACGCGCTGCACT  
GTGACATCGGCAACGCCACTGAGTCTACAAGATCTTCCAGGACGAGATC  
GGGGAGGTGCATTGCAGGCC---CAAC---CCGAGCAGGGAGGAGCGTCG  
GAGCTGGAGGGCGGCTCTGGACAAGCAGCTC-----

-----  
-----  
-----  
-----  
-----  
-----  
-----  
-----

-----TCATACACCATTGAGATGGGCCCCAAAGGGCC  
CCAGTGAAAAGAGAGCCCTCAGCCTTTCTCCTGTTCTGTGGAGGACCCTA  
CCAAACAGACCAAGTTCAAGGGCATCAAGACCTATATATCTTACCGGGTC  
ACCCCCAGCCATACAGGGCGACCCGTCTACCGCCGGTACAAGCACTTTGA  
TTGGCTGTACAACCGTCTGCTGCATAAGTTTACCGTCATCTCTGTGCCTC  
ACTTGCCAGAGAAACAGGCCACAGGGCGTTTTGAAGAGGACTTCATCGAG  
AAGCGAAAAGACGGTTGGTCATCTGGATGGACCACATGACCAGTCATCC  
TGTCCTTTTCACAGTACGAGGGCTTGGAACACTTCCCTCATGTGTGCTGATG  
ACAAGCAGTGGAAGCTGGGCAAGCGGCGGGCGGAGAAAGATGAGATGGTG  
GGTGCCCACTTCATGCTGACCTTTCAGATTTCCAACGAGCACCAGGATCT  
ACAGGACGTGGAGGAGCGGTGGATACCTTCAAGTCCTTTGCTAGGAAA  
TGGATGAAAGCGTCATGCAGCTGACCCACGTCCCTCAGA ACTGGTTCGA  
AAACACCTGGGTGGATTTCAGGAAGGAGTTCAGCGCCTGGGAAATGCGTT  
CCAGTCCATCAGCCAGGCATTTCATGCTGGACCCCTCCCATCGGTCGGATG  
CCCTCAACAACGCCATCTCCCATNNNNNNNNNNNNNNNNNNNNNNNGACCTCCTGGGCTTTCATCATCGA  
GGT

CGGAGTGGTCGGCAATCTTCTGATCTCCATCCTACTGGTCAAAGACAAGA  
GCCTACACCGAGCGCCCTACTACTTCTTACTGGACCTGTGCGCCTCTGAC  
ATCCTGCGTTCCGCCATCTGCTTCCCCTTCGTGTTACCTCCGTCAAGAA  
TGGTTCCACCTGGACGTACGGAACCCTAACCTGCAAGGTGATCGCCTTCC  
TGGGCGTGCTGTCTGCTTTCACACGGCCTTTATGTTGTTCTGTGTCAGC  
GTGACCCGCTACCTGGCCATCGCCACCATCGCTTCTACACCAAGAGGCT  
GACCTTCTGGACGTGCTTGGCCGTCATCTGCATGGTGTGGACGCTGTGAG  
TGGCCATGGCCTTCCCCCGGTGCTGGATGTGGGGACGTA CTCTTCATC  
AGAGAGGAAGACCAGTGCACCTTCCAGCACCAGCTCCTTCAGAGCCAACGA  
TTCCCTGGGCTTTATGCTGCTGCTCGCCCTCATCTTCTGGCCACGCAGC  
TAGTCTACCTCAAGCTCATCTTTTTTCGTCCACGACCGCCGGAAGATGAAA  
CCGGTCCAGTTTGTGCGGGCGGTTCAGCCAGAACTGGACCTTCCACGGGCC  
GGGGGCCAGCGGCCAGGCGGCGGCTAACTGGCTGGCGGGCTTTGGGAGAG  
GCCCCACTCCGCCACCCTTCTAGGCATCAGGCAGAACAGCAACCGGGCG  
GGCCGCAGACGACTCCTGGTGCTGGATGAGTTCAAGACAGAGAAGAGGAT  
CAGCCGGATGTTTACATCATGACCTTCTTCTTCTTCCCTGGCACTGTGGGGGC  
CCTATCTGGTGGCCTGCTACTGGAGAGTGTTCGCCAGGGGCCCCGCTGTG  
CCGGCGGGCTACCTGACTGCCGCGGTGTGGATGAGCTTCGCCACAGCGGG

GGTCAACCCCTTCATCTGCATCTTCTCCAACAGGGAGGCCAAATCTCGCT  
TTCACCCTGGCGTAGGGACTGGTCCTGGCACGGACC---GCAGCGTCCCA  
CTTAGTAACAGCTTGCTATCCCCGCAACAAACCGAAGAGCCCACAGTTG-  
--CTTCCCCACAGCGTTGGTTTTGTCACCC---CTGCCAACAACCGACTGG  
ACTTTGCCGCCTCGGCATACGATGCTGCCGCTGCTGCAGATTTTGCCGGC  
AACGCGGCCACCTTGCTGTCTACGCAGCGGCTGGAGTGAAGGCGC----  
--TTCCCCTCTCCACGGCAGGTTGCTCCAACAGACCGCTCGGGTATTACG  
CCGACCCGTCAG---GCTGG---GGCGCCCGTACGCCACCACAGTACTGT  
-----AGCAAGTCGAGCTCCGTTCTCTCATGCTGGCCCACGAATAC  
TGTTACCGGCAGAATGGGCC---CGTCCAGTTACTTGG-----CCG  
AGGA---GGGA---GACGC---CATTCCCACAGAGCGGTCTCCA---AT-  
--AGGGCGTCAGACGAG---GCAAAAACAAAAGACTT-----GTCCGA  
---ATCCAGCTGGATAGAG---ACGCCGTCTTCAATAAAGTCAATTGATT  
CCAGTGATTCTGGAATCTTTG---AGCAAGCAAAAACGGAGAAGAATTTCT  
CCGTCTGCCACACCA-----GTTTCGGAGACAGTGTCCCCGTTAAA  
ATCCGAG-----ACAGGCGAAGTCACAGAAAAGAGAAGTGGCTTTGG  
GGATAAATCCGTTTCGCAGACGGGATGGGTGCTTTCAAAATCAACCACAGT  
TCGCATGATCTTGGCTCCGG---GCAAACACTGCATTTTCTCCCAAGCG--  
-CCCGGTAC---GCAGCCGCTGCCCTGGGA---CATCACCA-----CC  
ACCCGACTCATGTGAGTTCT---TACTCTACGGCGGCTTTCAATTCACC  
CGGGATTTTCTCTTCAGAAATCGAGGCTTCGGAGACGCTACCAG-----  
-----CGCTCAGCACAGTCTCTTCGCCTCCGC---AGCGGGAAGTTT--  
-T-----GCAGCCCCACATGGACACTCAGATGCAGCGGGACACCTGCTC  
TTCCCAGGACTTCACGAG---CAAGCCGCCASCCATGCTTCTCAAATGT  
TGTTAATAGTCAGATGCGATTGGGCTTTTTCGGGGGACATGTACGGCAGAG  
CCGACCAGTATGGCCACGTTACCAGCCCGCGGT---CCGACCACTATGCT  
TCGACCCAGTTGCATGGCTATGGCCCTATGAACATGAATATGGCCGCG--  
-CATCATGGAGCAGGGGCTTCTTCCGTTACATGAGGCAGCCGATAAAAC  
AAGAGCTGATCTGCAAGTGGATCGAACCGGAGCAACTAACGAACCCAAAA  
AAGTCGTGCAACAAAACTTTTAGCACAAATGCACGAGCTCGTCACCCATCT  
GACTGTGGAGCATGTGGGAGGACCGGAGCAGTCGAACCACATTTGCTTCT  
GGGAAGAGTGTGCCCGAGAAGGAAAACCATTCAAAGCCAAATACAAACTT  
GTGAACCACATCAGAGTGCACACCGGAGAGAAACCATTTCCATGTCCATT  
TCCAGGTTGTGGCAA

>Hypoptychus dybowski

AGCCTTCTTATTCGAGCTGAGCTAAGTCAGCCTGGTGCTCTTCTTGCGA  
CGACCAGATTTACAATGTTATCGTTACTGCCACGCTTTCGTTATAATCT  
TCTTTATAGTCATGCCAATCATGATCGGAGGCTTCGGCAACTGACTTATC  
CCTTTAATAATCGGGGCCCTGATATAGCATTTCCTCGAATAAAACAACAT  
AAGTTTTTGGCTTCTTCCCCCTTCTTTTCTTCTCCTTTTAGCTTCTTCTG  
GGGTGAGGCGGGAGCTGGAACAGGTTGAACTGTTACCCGCCCTTTCT  
GGAAACCTTGCCACGCAGGTGCTTCAGTTGACCTAACAAATTTTTCCCT  
GCACCTAGCTGGGATTTCTTCTATTCAGGTGCTATCAATTTCAATACCA  
CAATTATTAACATAAAACCCAGCTATTTCCCAATACCAAACACCCCTG  
TTCGTTTGGTCTGTGCTGATTACTGCAGTCCTCCTTCTTGTCCCTCCC  
GGTTTTAGCAGCCGGAATCACCATGCTCTAACAGACCGTAACCTAAATA  
CAACCTTCTTTGACCTGCCGGAGGCGGAGACCCCATCCTTTACCAACAC  
TTATTCTGATTCTTCGGTCA-----  
-----  
-----  
-----  
-----  
-----



ACAACCCCCACCAT-----CTCCAGGCTATGTCTAATTCAGGGGCGGGT  
 CAGCAG-----CACGCGTCCCTGATGCCCGGCCCTTGTCTGCAGCTAT  
 GGGTATGGGCTGCCACATGGAATATCTCATCTACGCCTCTTTTTCATTCA  
 TGGGATGTTTACAGATCAGCGATGGATCAAACATAGTGAACCTGTTGGCA  
 AGTAACTCTCCGAGTGTTCGTACGCTATGACCCAGCAGAAATACTTCAG  
 TAACTACAGTCCTGTGATTGGCTTTTACATTTATGAGCCCATCGAGTACT  
 GGAACTCCACGGTGCAGGAGCACCTGAAGACCCTGAGTCATGGTTTCAAC  
 AAGATCTCTTGATGGACAACCTTTTCCACTACCTGCGCGTAGTAAATGT  
 GAGCGCGTGCACCAAGAGTGACTTCATCTCCATTCTCAAGGGGTCCTTCC  
 TTTCGAGCCCGGAGTACCAACATTTCACTGAGGACATCATATTTTCCCTTG  
 A---ACCGCAGACAG-----AAGAGTACGACATTATCGCTTCGCGGAT  
 GTACCTTGTGGCACGGACGACAGAGAAGAAGCGGGAGGAGGTGGTGGAGC  
 TTCTGGAAAAGCTTCGTCTTTGATGCTGATCAACAGCATTAAAGTTTATT  
 GCCTTCAATCCTACGTTTGTGTTTCATGGACCGCTACAGCTCTTCTGTGTCAT  
 CTCGCCCATCCTGACCTCAGGCTTCAGCGTACTCACAATCCTCATCCTCA  
 CTTTCTTCCCTGGTCATCAACCCGTTGGGTAACTTCTGGCTCATCCTCAGC  
 GTAACGTCCTGTGGAGCTTGGCGTCTTGGGCTTGACANNNNNNNNNNNNNNNNNNNNNNNNNNNNNNNNNNNNNCAGCWCTCA  
 AGAAT  
 GTGTCTACATCTTGCAATGTTGGCATTATYAATGGGCTCTCTGGATGGGC  
 TTCTCGGTGGATGACATCCAGCTGACACCATCACTCGGCGGTTTCGGT  
 ACGATGTGGCCCTGGTGTGAGCATTAAAGGATCTGGAGGAGGACATCATG  
 GAGGGGCTCAGAGAGAGTGCCATGGAAGACAGTGCTTGACCTCAGGCTT  
 CAGTGTGTCATGATCAAGGAATCCTGTGATGGCATGGGCGATGTCAGCGAGA  
 AGCACGGTGGAGGACCACCTGTTCCCTGAGAAGGCTGTGCGTTTTTCTTTC  
 ACTGTTATGTCCGTCTCCGTGCTGGCAGACGAGGAGGTG-----  
 -----GAAGAGTTACCATCTTTACTGAGCCAAAGC  
 CAAACTCAGAACTGTCTGTAAGCCCTCAGCTTGATGTTTCGTGGATGAG  
 TCAAACCATGAGACACTCACAGCTGTCTTGGGGCCAATAGTTGCAGAGCG  
 TAATGCAATGAAAGAAAGCAGGCTCATTCTTCCGTGGGCGGACTACCTC  
 GCTCCTTCCGCTTTCACCTCAGAGGCACAGGATATGATGAGAAAATGGTG  
 CGCGAGATAGAGGGCCTGGAGGCCCTCAGGCTCCACCTACGTCTGCACTCT  
 TTGTGACTCCACGCGGGCAGAGGCTTCTAAAAACATGGTGCTACACTCCA  
 TCACTCGCAGTCATGAAGAGAACCTAGATCGTTACGAAATATGGAGAACC  
 AACCCATTTTCTGAATCTGTAGATGAACTGCGGGACAGAGTCAAAGGGAT  
 CTCTGCCAAACCCTTCATGGAGACCCAGCCACGCTGGATGCATTACACT  
 GTGACATTGGCAATGCCACTGAGTCTACAAAATCTTCCAGGACGAGATC  
 GGGGAGGTATAACAAAAGGT---CAAC---CCTAGTCCGGAGGAACGGCG  
 GAGCTGGAGGGCAGCGCTGGATAAACAGCTCAGGACGAAGATGAAACTTA  
 AACCGGTGATGAGGATGAATGGGAACTACGCCCCGAGGCTAATGACTCAA  
 GATGTGGTAGAGGTGATTTGTGAGCTGGTGCCGTGAGGAGAGGAGAGA  
 GGCCCTGAGGGAGCTGATGAGGCTTACATCCAAATGAAGCCTGTGTGGC  
 GCGCCACCTGCCCTGCCAAGGAGTGCCCCGACGAGCTGTGCCGCTACAGC  
 TTAACTCCAAACGCTTTGGCCGACCTTCTCTCCTTACCTTCAAATATAG  
 GTATAATGAAAAGATAACCAACTACTTGACACAAGACGTTGGCCCATGTGC  
 CTGAAATCATAGAGAGANNNNNNNNNNNNNNNNNNNNNNNNNNNNNNNNNNNNNNNNNNNTC  
 GTACACCATCGAGATGGGGGCCCCGGGGCCC  
 CTGTGGAAGGAGAGCCCCGCGGCCGTCTCCTGCTCCATCGAGGACCCCAT  
 CAAACAGACAAAGTTCAAGGGCATCAAGACGTACATCTCGTACCGGGTGA  
 CGCCGAGCCACACGGCGCGCCCCGTCTACCGGCGCTACAAGCACTTCGAC  
 TGGCTGTACAACCGGCTGCTGCACAAGTTACCCGTGATCTCCGTGCCCCA  
 CCTGCCCGAGAAGCAGGCCACGGGGCGCTTCGAGGAGGACTTCATCGAGA  
 AGCGCAAGCGGGGCGTGCATCCTGTGGATGAACCACATGACCAGCCACCCG  
 GTGCTCTCCAGTACGAGGCTTCGAGCACTTCTGATGTGCGCCGACGA



CAAGCAGTGGAAAGCTGGGCAAGAGGCGGGCGGAGAAGGACGAGATGGTGG  
GCGCCACTTCATGCTGACCCTGCAGATCCCCGGCGAGCACCAGGACCTG  
CAGGACGTGGAGGAGCGCGTCGACACCTTCAAGGCC TTCGCCAAGAAGAT  
GGACGACAGCGTGATGCAGCTGACGCACGTGCCTCGGAGCTGGTGCGCA  
AGCACCTGGGCGGCTTCAGGAAGGAGTTCAGCGGCTGGGCAGTTCCTTC  
CAGTCCGT CAGCCAGGCGTTCACGCTGGACCCGCCAACAGCTCGGAGGG  
CCTCAACAAAGCCATGTGCGACNCTCTCGCCACGTTCCTCAAACCTGACCTC  
TCTGGGTTTCATCATTTGGAGTGGGTGTGGTTCGAAAACCTCCTGATCTCCA  
TCCTGCTCGTCAAAGACAAGAGTCTCCACCGAGCGCCCTACTATTTCTCTG  
CTGGACCTGTGCGCTCTGACATCCTGCGCTCTGCCATCTGCTTCCCCTT  
TGCTTACCTCGGTCAAAAATGGATCCGCCTGGACCTATGGCACGCTGA  
CCTGCAAAGTGATCGCCTTCTSGGTGTGCTTTCTGTTTTCCACACGGCG  
TTTTATGCTGTTCTGCGTCAGCGTCACGCGCTACCTGGCCATCGCACACCA  
CCGCTTCTACACCAAGAGGCTGACCTTCTGGACCTGCCTAGCCGTCATCT  
GCATGGTGTGGACGTTGTGCGGTGGCTATGGCGTTCCCGCCGGTGCTCGAC  
GTAGGGACGTA CTCTTTCATCCGGGAGGAGGACCAGTGCACGTTCCAGCA  
CCGTTCCCTTCAGGGCGAATGATTCGCTGGGCTTCATGCTCCTGCTGGCGC  
TCATCCTCCTGGCCACGCAGCTGGTCTACCTCAAGCTCATTTTTCTTTGTC  
CACGACCGTCGGAAGATGAAGCCCGTCCAGTTTTGTGCCTGCTGTTAGCCA  
GAACTGGACCTTCCACGGGCCAGGCGCCAGCGGGCAGGCGGCCGCAACT  
GGCTGGCCGGATTTGGTTCAGAGGCCACCCCGCCTACACTGCTGGGCATC  
CGGCAGAACAGCAACGCAGCGGGCCGAGGCGTCTACTGGTATTGGATGA  
GTTCAAACAGAGAAGAGGATTAGTAGGATGTTCTACATCATGACGTTTTT  
TCTTTCTGGCGCTTTGGGGGCCCTACCTGGTTCGCTGCTACTGGCGGGTG  
TTTGCAAGGGGCCCGTGGTCCCTGGGGGCTACCTGACGGCCCGCGTGTG  
GATGAGCTTTGCCAGGCTGGGGTCAATCCTTTTCATCTGCNNNNNNNNNNNNNNNNNNNGCCAAATCTC  
GCTTTCACCCTGGCGTGGGGAGCGCTCCTGGCACGGAGC---GCAGCGTC  
CCACTCTGCAACAGCTTGCTCTCCCCGCAGCAAAGCGACGAGCCCCCTGC  
TGCCACCCCCCGCAGCGATGGTTTGTACCC---CTGCCAACAACCGAC  
TGGACTTTGCTGCCTCGGCATACGACGCCGCC-----GATTTGCGC  
GGCAACGCGGCCACCTTGCTGTCTACGCGGCGGCCGGAGTGAAGGCTC-  
-----TTCCCCTGCCGGCGGGCTGCTCCAACCGGCCTCTTGGYTATT  
ACGCAGACCCGTCGG---GCTGG---GGAGGACGCACGCCGCCGAGTAC  
TGTGGCGTCAACAGCAAATCCAGCTCGGTGTTTTCTGCTGGCCCGCGAA  
CTCGATCGGTGGAAGAGCGGCCG---CC---GGCTACCTGG-----  
CCGAGGA---GGGG---GACTC---CATCGCCACGGAGAGGTCGCCG---  
AT---CGTCGGCTCGGACGAG---GCCAAAGCCAAAGACATGAC---GTC  
CGA---GTCGAGCTGGATAGAG---ACGCCGTCTCCATCAAGTCGATCG  
ATTTCGAGTGATTCTGGTATCTTTG---AACAGGCCAAAAGGAGGAGGATC  
TCACCTTCTGCCACGCCG-----GTTTCAGAGACAGTGTCCCCGTT  
GAAATCTGAGCATCACTCAACAGGCGAAGTACGGAGAGAGAAGTGGCGT  
TGGGGATCAATCCGTTTCGCGGATGGGATGGGCGCCTTCAAATAAACCAC  
AGCTCCACGACATCGGCTCCGG---ACAAACGGCGTTCTCCTCCCAGGC  
A---CCCGGCTAC---GCAGCGGCCGCCCTGGGA---CACCATCA-----  
-CCACCCGACCCACGTTGGCTCT---TACTCCACGGCGGCTTTCAACTCC  
ACCAGGGACTTTCTGTT CAGAAATCGGGGTTTCGGGGACGCCGCCG---  
-----GGCGCAGCACAGTTTGTTCGCCTC-----AGGGAGTT  
T---C-----GCGGGGCCACACGGACACTCGGACGCGGCGGGCCACCTG  
CTCTTCCCGGACTCCACGAG---CAAGCGGCGAGCCATGCGTCTCCAA  
CGTGGTCAACGGCCAGATGCGCCTGGGCTTCTCGGGGGACATGTACGGGA  
GGGCCGAGCAGTACGGCCACGTACAAGCCCGCGGT---CCGACCCTAC  
GCTTCGACCCAGCTGCACGGCTACGGCCCCATGAACATGAATATGGCCGC  
G---CACCACGGAGCGGGGCCCTTCTTTTCGATACATGAGGCAGCCGATCA

AGCAAGAGCTCATCTGCAAGTGGATCGAGCCGGAGCAGCTGACGAATCCT  
AAAAAGTCGTGCAACAAAACCTTTTAGCACGATGCACGAGCTCGTGACCCA  
TCTGACGGTGGAGCATGTGGGGGACCGGAGCAGACCAACCACATCTGCT  
TCTGGGAGGAATGCGCCAGAGAAGGGAAGCCGTTCAAAGCCAAATACAAA  
CTTGTAATCATATCAGGGTACACACCGGAGAGAAGCCCTTCCCCTGTCC  
GTTCCCCTGGCTGNNNNNNN

>Icichthys lockingtoni

-----  
-----  
-----  
-----  
-----  
-----  
-----  
-----  
-----  
-----  
-----  
-----  
-----  
-----  
-----  
-----  
-----  
-----  
-----  
-----  
-----

-----TTCCTAGAGAGGAACCTTCACCCGACTAATTGCCTTGG  
CATGCTGTTGCTGTCTGACGCTCACCAAGCTGTCAGAGCTCT  
CTTGGGGCATGTGCCCTCAGCAACTTCCCCTATTTGCAAGACAGAGGAC  
TTCCCTCAACTGCCAAAGATATGGTGGTGCAGCTTTTGTACATGAGGA  
GCTGGAGACAGAAGATGAGAGACTGGTTTATGAAGCTGCCCTGAAGTGA  
TCAACTATGACCTGGAAGGAGGCACTGCCACCTTCCAGAGCTCCTGAGA  
ACGGTCCGTCTTGCCCTGCTGCCCCGATCTTTCTGATGGAGAATGTCTC  
GACAGAAGAGCTGATCAACGCCAGGCCAAGAGCAAGGAGCTGGTGGATG  
AGGCTATCCGCTGTAAGCTGAAGATCCTKCAGAATGACGGCGTTGTTAAC  
AGCCCGTGTGCTCGACCAAGAAAACCAGCCATGCTCTCTTTCTCCTGGG  
AGGGCAGACTTTCATGTGTGACAAGTTGTACCTGGTGGACCAGAAGGCCA  
AAGAGATYATCCCGAAGGCGGACATTTCCAGCCCAAGGAAGGAGTTCAGC  
GCCTGCGCCATCGGCTGTAAGGTGTACATCACAGGTGGGA--GAGGCTC-  
AGAGAATGGTGTGTCCAAGATGTATGGGTCTATGACACCGTCCAGGAGG  
AATGGTCCAAAGCGGCGCCCATGCTCATCGCCAGGTTTGGTTCATGGCTCT  
GCAGAGCTGAAACACTGCCTGTAYGTGGTAGGAGGTCACACCGCAGCAAC  
TGGCTGCCCTCCCTGCTTCTCCATCCGGATGAATACATCGTTGTGTTTCA  
CGTTCAACAACAAGGCTGATACTGAACGAAGCCGAGCTAATCATGGTGCT  
GGCCAGGAGTTCCAGATGAGAGTGGTACAGTTTCCCTAGAGGAACAGT  
CTTTCCCAGCATTGTCCAGGTGATCAGCGGTGCTTCCATGTTAGTCAGC  
ATGCATGGAGCTCAGCTTATCACCTCACTCTTCCCTCCCAGAGGAGCTGC  
TGTGGTGGAGCTGTTCCCCTTTGCTGTGAACCCAGAGCAGTACACCCCAT  
ATAAAACCCTTGCCCTCCCTTCCAGGCATGGACCTTCAATTATGTTTCCCTGG  
AGGAACACTCAGGAGGAGAACACTGTCACCCATCCAGACAGACCCCTGGGA  
ACAAGGAGGCATCACTCACTTGGAGAAGGAGGAGCAGGAGCGAATTCCTGA  
CCAGCAAAGACGTCCCAGGCACTTGTGCTGCCCAATCCGGAGTGGCTC  
TTCCGAATCTACCAGGACACTTTGGTAGACATCCCCTCCTTCCCTGGAAGT  
CCTCAA---GGAGGGAATGAAG---ACCAAGCCAGCTTGAAGAA---GT  
CCAAACCAGCCAGTACAGTCCATCCGGGCGGGTAAGACAAGCCAGTGT  
CAGACCTCAGTACAAACCACCAATGAGGCTAAACTCACAGTCTCCTGGCA

GATCCCGTGAATCTGAAATACCTGAAAGTAAGAGAGGTGAAGNNNNNNNNNNNNNNNNNNNAAAAGAG  
ACACCAGCAAGGGAACCTCTGGAGGATCAAATCATCCAGGCGAACCCGGCG  
CTGGAGGCCTTCGGAAACGCCAAAACGCTGAGAAACGACAACTCGTCCCG  
TTTTGGAAAATTCATCCGAATTCACCTTCGGAAACAGCGGCAAGCTGTCGT  
CCGCTGACATCGAGACGTNCNTGCTGGAGAAGTCTCGTGTACCTTTCAGCT  
CAAGGCTGAGAGGGANTACCACATCTTTTACCAGATCNTGTCCAATCAGAAG  
CCAGAGCTGCTGGACATGCTGTTAATCACCAACAACCCGTACGACTACTC  
CTACATCTCCCAAGGAGAGGTAACGGTCACCTCCATCAACGACTCGGAGG  
AGCTGATGGCCACCGACAGTGCCTTCGATGTGCTCGGCTTCACTCCGGAG  
GAGAAGATGGGCGTNTATAAACTGACCGNGCCATCATGCACTACGGCAACA  
TGAAGTTCAAGCAGAAGCAGCGTGAGGAGCAGGCTGAGTCTGACGGGACG  
GAGGCTGCTGATAAATCAGCTTACTTGATGGGGCTGAACTCCGCTGACCT  
CATCAAAGGGCTGTGCCATCCCAGAGTCAAGGTAGGAAACGAGTACGTCA  
CCAAAGGCCAGAGTGTGGACCAAGTCTACTACCCCAACAAGGAGGCCTTC  
AAGTGTGAGGAGTGTGGGAAGCACTACAACACCAAGCTGGGATATAAGCG  
ACATGTGGCCATGCACTCTGCCACGGCAGGGGATCTCACCTGTAAAGTGT  
GCATGCAGAGCTACGAGAGCACACCTGTTCTCCTGGAGCACCTCAAGAGC  
CACTCGGGGAAGTCTCGGGCGGAGCCAAGGAGAAAAAGCACCCGTGCGA  
CCACTGCGACCGACGTTTCTACACGCGGAAGGATGTGAGACGGCACATGG  
TGGTCCACACGGGCCGAAAGGACTTCNTGTGCCAGTACTGTGCCCAGCGCT  
TTGGCAGGAAGGATCACCTGACCCGCCATGTGAAGAAGAGCCACTCGCAG  
GAGCTGCTGAAGATCAAGACGGAGCCTCCTGATATGTTAGGTCTTTTAGC  
TTCGGGGTACCACCTTGCTCTGTGAAGGAGGAGCTTAGCCCCATGATGT  
GCGGCATGGGTCCCAACAAAGACCCCATGATGGGCAAACCGTTCCCAGT  
GGTGCCCTTTTCTATGGGCATGTACAACCCCCACCAC-----CTTCA  
GGCCATGTCTAATCTGGGGTGGGTCTATCCA-----CACCCGTCCCTGA  
TGCCAGCCCCCTGTCTGCAGCTATGGGCATGGGCTGTCACATGGAATAT  
CTCATCTACGCCTCTTTTTTCATTCATGGGATGTTTACAAATCAGTGATGG  
ATCAAACATTGTGAACCTGCTGACTAGTAACTCTCCAAGTGTTCGTACG  
CTCTGACCCAGCAGAAATACTTCAGCAACTACAGTCCCTGTGATTGGGTTT  
TACATTTATGAGCCCATTGAGTACTGGAACCTCCACGGTGCAGGAGCACCT  
GAAGACTCTGAGTACGGCTTCAACAAGATCTCCTGGATGGACAACTTTT  
TCCACTACCTGCGGATGGTGAATGTGAGTGCCTCGACCAAGAACGACTTT  
ATCACCATCCTCAAGGGCTCCTTCCCTGCGCAGCCAGAGTACCAGCACTT  
CACTGAGGACATCATATCTCCAAGA---ACCGTGAGACTG-----ACG  
AATACGACATTATCGCCTCACGCATGTATTTGGTGGCTCGGACCACAGAG  
AAGAAGCGCGAGGAGGTGGTTGAGNTTNTGGAGAAGCTTCGCCCATTGATGC  
TGATCAACAGCATCAAGTTCATTGCCTTCAATCCCACGTTTGTGTTTCATG  
GACCGCTACAGCTCCTCCGTCTCTCGCCATCCTTACCTCAGGCTTCAG  
CGTGCTACCATCCTTATCCTCACTTTCTTCTGGTTCATCAACCCCTTGG  
GGAACCTCTGGCTCATCCTCACGGTTACGTCCGTGGAGCTGGGCGTCTTG  
GGTTNNNNGGCTTTCACCAGTTTGAGTGGCAGCCAGCTCTCAAGAATGTGTCT  
GCATCTTGCAATGTTGGCATTATTAATGGGCTCTCTGGGTGGACTTCCTC  
GGTGGATGACTCCCAGCTGACACCATCACTCGACGGTTTCGCTATGATG  
TGGCACTAGTGTGAGCATTAAAGGATCTGGAGGAGGACATCATGGAAGGG  
CTGAGAGGTAGCGGGATGGAAGACAGTGTTCGACGTCAGGCTTCAGTGT  
TATGATCAAGGAATCTTGTGATGGCATGGGTGATGTCAGCGAAAAGCACG  
GTGGAGGACCAGTTGTTCTGAGAAGGCTGTACGTTTCTCTATCACTATT  
ATGCTGTCTCTGTCTGGCAGATGACGAGGAG-----  
-----GAGGCGGTTACTATCTTACAGAGCCAAAGCCAAACT  
CAGAAGTGTCTGTAAGCCCCTTTGCCTGATGTTTGTGGATGAATCAGAC  
CATGAGACACTCACAGTCTCCTGGGGCCTGTAGTTGCAGAGCGTAATGC  
AATGAAAGAGAGCAGGCTCATCCTTCCATTGGCGGCCTGCCTCGCTCCT

TCCGCTTCCACTTCAGAGGCACGGGATACGATGAGAAGATGGTGCGAGAG  
ATGGAGGGCCTGGAGGCCTCAGGGTCCAGCTATGTCTGCACTCTGTGTGA  
TTCCAGTCGGGCAGAAGCATCTGAAAACATGGTGTACTACTCCATCACCC  
GCTGCCATGACGAGAACCTTGAACGTTACGAAATATGGAGAACCAACCCC  
TTTTCTGAATCTGGAGAAGAGCTGCGAGATAGAGTCAAAGGGGTCTCTGC  
CAAGCCCTTCATGGAGACCCAGCCACGCTGGATGCATTACATTGTGACA  
TTGGCAATGCCACTGAGTCTACAAAATCTTCCAGGACGAAATTGGGGAG  
GTGTACCAAAAGGT---CAAT---CCCACCCGGGAGGAACGGCGCAGCTG  
GAGGGCAGCCCTAGATAAACAGCTGAGGAAGAAGTTGAAGCTTAGACCAG  
TAATGAGGATGAATGGGAACATGCCCGCAGGCTAATGACCCAGGAGTCT  
GTGGAAGTGGTGTGTGAGCTGGTACCCTCAGAGGAGAGGAGGGAGGCCCT  
GAGGGAGCTTATGAGGCTATACCTCCAGATGAAGCCTGTGTGGCGTGCCA  
CCTGCCAGCCAAGGAGTGCCCTGACCAGCTGTGCCGCTATAGCTTTAAC  
TCCCAGAGCTTTGCCGACCTCCTCTCCTCTACCTTCAAATATAGGTACAA  
TGGAAAAGATAACCAATTACCTGCACAAGACCCTGGCCCATGTCCCTGAAA  
TCATAGAGAGAGATGGATCCATCGGAGCCTGGGCCAGTGAGGGGAACGAG  
TCGGCAAACAAANNNNNNNNNNNNNNNNNNNNNNNNNNNNNNNNNNNNNNNN  
NNNNNNNNNNNNNNNNNNNNCCACAAAACAGACAAAGTTCAAAGGCATCAAGACGTAC  
ATTTTCATACCGGGTCACGCCGAGCCACACAGGGCATCCCGTCTACAGGCG  
CTACAAACACTTTGACTGGCTGTACAACCGCCTGCTGCACAAGTTCACTG  
TGATCTCCGTGCCTCACCTGCCTGAGAAGCAGGCCACGGGGCGATTGAG  
GAAGACTTTTATTGAGAAGCGGAAGAGACGACTGATACTGTGGATGAACCA  
CATGACCAGTCACCCGTCTCTCCAGTATGAAGGCTTTGAGCACTTTC  
TGATGTGCGCTGACGACAAGCAATGGAAGCTGGGCAAGAGACGAGCTGAG  
AAGGAAGAGATGGTGGCGCCCATTTTCATGCTGACCCTCCAGATCCCTAA  
CGAGCACCAGGACCTTCAGGATGTAGAGGAGAGAGTCGACACCTTCAAGG  
CCTTTGCTAAGAAAATGGACGACAGTGTTCATGCAGCTCACACATGTTGCC  
TCGGAGCTGGTGCCTAAGCACCTAGGTGGATTTCAGGAAGGAGTTCAGCG  
GCTGGGAAATGCCTTCCAGTCTATTAGTCAGGCATTCATGCTGGACCCTC  
CCCATAGCTCAGACACCCTCAACAACGCCATCTCCCATNNNNNNNNNNNNNTTCCCTCAAGCTG  
ACCTCTCTGGGTTTCATCATTGGAGTCGGTGTGGTTGGAAACCTCCTGAT  
CTCCATCCTGCTGGTCAAAGACAAGAGCCTGCACCGAGCACCCCTACTATT  
TCCTGCTGGACCTGTGCGCCTCCGATATCCTCCGCTCTGCCATCTGCTTC  
CCCTTGTCTTCACCTCGGTCAAGAATGGATCTGCCTGGACCTATGGCAC  
GCTGACCTGCAAAGTGATCGCCTTCTGGGTGTGCTCTCCTGTTCCACA  
CGGCGTTCATGCTATTCTGCGTGAGCGTCACCCGCTACCTGGCCATCGCA  
CATCACGTTTCTACACCAAGAGGCTGACCTTCTGGACCTGTCTGGCTGT  
CATCTGCATGGTGTGGACGTTGTGAGTATGGCGTTCCCGCCGGTGC  
TAGACGTGGGGACGTACTCTTTTATCCGGGAGGAGGACCAGTGCACATTC  
CAGCACCGCTCCTTCAGGGCGAATGATTGCTGGGCTTCATGCTCCTGCT  
GGCGCTCATTCTCCTGGCCACACAGCTGGTTTACCTCAAGCTCATCTTCT  
TCGTCCACGACCGTCGAAAGATGAAGCCTGTCCAGTTCGTGCCTGCTGTC  
AGCCAGAACTGGACCTTCCACGGGCCAGGCGCCAGCGGGCAGGCGGCGGC  
CAACTGGCTGGCCGATTTGGTAGAGGCCCCACCCGCCTACTTTGCTGG  
GCATCCGGCAGAACAGCAACGCAGCGGGCCGAGGCGTCTACTGGTATTG  
GATGAATTCAAAACAGAGAAGAGGATTAGTAGGATGTTCTACATCATGAC  
GTTTTTCTTCCCTGGCACTGTGGGGGCCCTATCTGGTAGCCTGCTACTGGC  
GGGTGTTTGCAAGGGGCCCTGTAGTCCCTGGGGCTACCTGACGGCAGCC  
GTGTGGATGAGCTTTGCCAAGCTGGGGTCAATCCTTTCATCTGCNNNNNNNNNNNNNGCCAA  
ATCTCGCTTTCACCCGTGGCGTGGGGACTGGTCCCTGGCACGGAGC---GCA  
GCGTCCCACTCGGCAACAGCTTGCTATCCCGCAGCAAACCGAGGAGCCC  
ACTGTTGCCACCCCGCAGCGATGGTTTGTACCC---CTGCCAACAA  
CCGACTGGACTTTGCTGCCTCGGCATACGACGCCGCT-----GATT



-----  
-----  
-----  
-----  
-----  
-----  
-----  
-----  
-----  
-----

-----GGACGAGTACATAGTGGTGTTCAGT  
CGCTCCTCTACGAGGCTGATTCTGAACGAGCCAGAGCTAATCATGGTGT  
GGCGCAGGAGTTTCAGATGAGGGTGGTCACGGTGTCTCTGGAAGAGCAAT  
CCTTCCCCAGTATCATCCAGGCGATCAGCGGCGCTCCATGCTGGTCAGT  
ATGCACGGAGCTCAGCTTGTACCTCCCTCTTCCCTCCCCAGAGGGGCTGC  
CATTGTGGAGCTCTTCCCCTATGCTGTGAACCCAGAGCAGTATACTCCGT  
ACAAAACCCTGGCCTCCCCTCCCAGGCATGGATCTTCAATACGTTTCCTGG  
AGAAACACAATCGAAGAGAACTCGGTTAGCCACCCGATAGGTCTGGGA  
CCAAGGAGGGATTGCTCACCTAGACAAGGAAGAGCAGGAGAGAATTCTCG  
CCAGCAAGGAGGTCCCCAGGCACCTGTGCTGCCGCAACCCCGAGTGGCTC  
TTCCGAATCTACCAGGACACTCTGGTGGACATCCCCTCATTCCCTCAAGAC  
CCTCAA---GGAGGGCCTAAAG---ACCAAGCCCAGCTTGAAGAA---GT  
CCAAGTCGGCCAGCACTGTTACCCGGGCCGGGTCAGGGAAGCCCAGTGC  
CAGACCTCGGTCCAGGACACCAACGAGGCTAAACTCACTGTCTCCTGGCA  
GATCCCCTGGAATCTCAAGTACCTGAAGGTACGAGAGGTTAAGTACGAGG  
TCTGGATCCAGAAGAAAGATTCAAGCAAAGGGACACTGGAGGATCAAATC  
ATTCAGGCAAACCCTGCACTGGAGGCTTTTGGTAATGCCAAAACAGTGAG  
GAATGATAACTCATCCCGCTTTGGGAAATTCATCCGAATTCACTTTGGAA  
CCAGTGGCAAATTGTCTCTGCCGACATTGAGACTTATCTCCTGGAGAAG  
TCACGTGTTACCTTTCAGCTCAAGGCTGAGAGGAACTATCACATCTTCTT  
CCAGATCCTGTCCAATCAAAGCCAGAGCTGTTGGACATGATGTTGGTCA  
CCAACAACCCATATGACTACTCCTTCATCTCCAAGGAGAGGTAACAGTA  
TCATCCATCAATGATGCAGAGGAGCTGATTGCCACTGACAGTGCCTTTGA  
TGTCTCGGCTTCACCCAGGAGGAGAAGCTGGGAGTTTACAAGTTGACAG  
GTGCGATCATGCACTATGGCAACATGAAGTTCAAGCAAAGCAGCGTGAA  
GAGCAGGCTGAGTCTGATGGCACAGAGGCTGCTGATAAGTCAGCTTATCT  
AATGGGGCTGAATTCTGCCGACCTCATTAAAGGGCTTTGCCATCCCAGAG  
TCAAAGTAGGAAATGAGTACGTACCAAAGGCCAAGGTGTAGATCAGGTT  
TACTACCCCAACAAGGAGGCCTTCAAGTGTGAGGAGTGTGGTAAGCACTA  
TAACACCAAGCTGGGATAACAAGCGCCATGTGGCCATGCACTCGGCCACGG  
CGGGCGACCTCACCTGTAAAGTGTGTATGCAGAGCTACGAGAGCACGCCG  
GTCTCCTGGAACACCTCAAGAGCCACTCTGGGAAATCTTCTGGTGGAGC  
CAAGGAGAAAAAGCACCCATGTGATCACTGTGACCGTTCGGTTCTACACCC  
GGAAGGACGTGAGGCGGCACATGGTAGTCCACACGGGCCGAAAGGACTTC  
CTGTGTCAATACTGCGCCAGCGCTTTGGCCGGAAGGATCACCTGACGCG  
ACACGTGAAGAAGAGCCACTCACAGGAGTTGCTGAAGATAAAGTCAGAGC  
CTCCGGATATGCTGGGCCTCCTGGGCTCCGGCTCGCCGCTTGTGCAGTT  
AAGGAGGAGCTTAGCCCCATGATGTGCAGCGTGGGTCCCAACAAAGACCC  
CATGATGGGGAAACCCTTCCCCAGCGGGACCCCTTCCCCATGGGCATGT  
ATAACCCGCACCAC-----CTCCAGGCCATATCCAGCCCTGGGGTGGGC  
CACCCC-----CATCCCTCCCTGATGCCTAGTTCCCTGTCAGCGGCTAT  
GGGCATGGGCTGTCAATGGAATATCTCATTACGCTTCCCTTCTCCTTCA  
TGGGATGTTTACAAAATCAGTGATGGGTCCAACATTGTGAATTTATTAGCT  
AGTAATCTCTGAGCGTCTCATATGCTCTGACCCAGCAAAGTATTTTCAG

TAACTATAGTCCCGTCATTGGGTTTTACATCTACGAGCCCATTGAGTACT  
GGAACTCAACAGTGCAGGAGCACCTGAGGACACTGAGCGATGGTTTCAAC  
AAGATCTCTTGGATGGACCACTTCTTCCACTACCTGCAGGTGGTGAATGT  
GAGCGCGTCAACCAAGAGTGACTTTATCGGCATCCTCAAAGGCTCCTTCT  
TGAGGAACCCGGAGTACCAGCACTTCATGGAGGACATCATCTTCTCCAAG  
A---ACCGGGAGAGCG-----ATGAGTACGACATCATCGCCTCACGCAT  
GTACCTGGTGGCGCGCACCACGGAGAAGAGGGCGGAGGAGGTGGTTGAAC  
TTCTGGAGAAGTTGCGACCGCTGATGCTCATCAACAGCATCAAGTTCATT  
GCTTTCAACCCGACCTTTGTCTTCATGGACCGCTACAGCTCCTCCGTCAT  
CTCACCCATCCTCACCTCGGGCTTCAGCGTCCTCACCATCCTCATCCTCA  
CTTTCTTCTGGTCATAAACCCGTTGGGGAACCTTTTGGCTCATCCTGACG  
GTCACATCCGTGGAGCTGGGAGTTTTGGGTTTAATG-----

-----GCGAGAAGCACGGAGGAGGGCCGGCGATTCC  
CGAGAAGGCGGTCCGCTTCTCCTTCGCCATTATGTCAGTCTCTGTCCGGG  
TCGAAGGAACGGAA-----GAGGCG  
GTCACCGTCTTCAGGGAGCCGAAGCCCAACTCTGAATTGTCCTGTAAACC  
CCTCTGTTTTGATGTTTGTGGATGAGTCTGACCATGAGACCCTGACGGCCA  
TTCTGGGGCCTTTGGTGGCCGAGCGGAATGCGATGAAGCAGAGCTGCCTG  
ATCCTGTCAATTGGGCGGCCTCCCGCGCTCTTCTCCTTTGAGTTCCGAGG  
CACGGGCTACGACGAGAAGATGGTGCAGAGATTGGAGGGTATGGAGGCCT  
CTGGTTCCACCTACGTCTGCACCCGTGTGCGACTCCACCCGAGCGGAGGCC  
TCTCGAAACATGGTGTCTCCACTCCATCACCCGGAACCACGGCGAGAACCT  
GGAGCGGTACGAGATGTGGAGGAGCAACCCTTCTCGGAGTCGGCCGAGG  
AGCTGCGGGAGCGGGTCAAGGGCATCTCTGCCAAACCCTTCTGGAGACC  
CAGCCCACCTTTGGATGCATTGCACTGCGACATTGGCAACGCCACTGAGTT  
TTACAAGATCTTCCAGGATGAAATCGGGGAGGTGTTCCGGGGGAC---CA  
AC---CCCAGCAGAGAAGAGCGGAGGAGCTGGAGGACGGC-----

-----G-----

-----CC  
TCTTGCCACGTTCTCCTCAAACCTGACCTCTCTGGGCTTCATAATTGGAGTCG  
GCGTGGTAGGAAACCTGCTGATCTCTATCCTGCTGGTCAAAGACAAAAGC  
CTGCACCGCGCACCTACTACTTCTGCTGGACCTGTGCGCCTCCGACAT  
CCTGCGCTCCGCCATCTGCTACCCCTTCGTCTTCACCTCTGTCAAGAATG  
GATCCGCCTGGACCTACGGCACGCTCACCTGCAAAGTGATTGCCTTCCTT  
GGCGTGCTCTCCTGTTTCCACACGGCATTATGCTGTTCTGCGTCAGCGT  
CACCCGCTACCTGGCCATCGCCACCACCGTTTCTACACCAAGAGGCTGA  
CTTTCTGGACCTGCCTGGCCGTCATCTGCATGGTGTGGACGTTATCCGTG  
GCCATGGCCTTCCCCCAGTTCTCGATGTAGGGACTTATTCCTTTATCCG  
GGAGGAGGACCAGTGTACATTCCAGCACCGCTCCTTCAGGGCTAACGACT  
CCCTGGGCTTTATGCTCTTGCTGGCACTTATCCTGCTGGCTACGCAGCTG  
GTTTACCTCAAGCTCATCTTCTTCGTCCACGACCGCAGGAAGATGAAGCC  
TGTCAGTTTGTGCCAGCTGTCAGCCAGAACTGGACCTTCCATGGGCCTG  
GTGCCAGCGGGCAGGCAGCGGCAACTGGCTGGCCGGATTTCGGGAGAGGC  
CCCACCCCGCTACCTTGCTGGGCATCCGTCAGAACAGCAACGCGGCGGG  
CCGCAGGCGTCTGCTGGTGTGGATGAGTTTTAAAAACAGAGAAGAGGATAA  
GTAGGATGTTCTACATCATGACGTTTTTTTTTTCTGGTGTGTGGGGGCC  
TATCTAGTGGCCTGCTACTGGCGGGTGTTCGCCAGGGGCCCGTGGTGCC  
CGGGGGCTACCTGACTGCAGCTGTGTGGATGAGCTTCGCCAGGCGGGGG  
TCAACCCCTTCATCTGCATCTTCTCCAACAGGGAG-----

-----CAGAGAGAGAGGTAGCTTTGGGG  
ATAAATCCATTCGCAGACGGGATGGGCGCCTTTAAGATCAACCACACTTC  
TCACGACATCGGCTCCGG--GCAGACGGCGTTTTCTTCCCAGGCG--C  
CCGGGTACGCTGCCGCGGCCGCCCTGGGGCACCACCACCA-----CCAC  
CCGACCCATGTAGCTCG--TACTCCACGGCGGCTTCAACTCCACTCG  
GGACTTCTGTTTCAAGAACCGGGGCTTCGGAGACGCCACCGG-----  
----CGCGCAGCACAGCTTGTTCGCCTC-----GGGAGGTTT---T  
-----GCGGGGCCACATGGACACTCGGACGCCACGGGACACCTGCTCTT  
CCCGGGGCTCCACGAG---CAAGCCGCGGGCCACGCGTCGTCCAATGTGG  
TGAACAGCCAGATGCGCTTGGGTTTTTCAGGGGACGTGTACGGGAGGGCC  
GAACAGTACGGCCACGTTACGAGCCCCGAGGTCAGCAGAGCACTATGCCTC  
GACCCAGTTGCACGGCTACGGCCCCATGAACATGAACATGGCCGCG---C  
ACCACGGAGCGGGGGCCTTCTTCCGATACATGCGCCAGCCGATCAAGCAA  
GAGCTCATCTGCAAGTGGATCGAACCGGAGCAGCTGACCAACCCCAAAA  
GTCGTGCAACAAAACTTTCAGCACCATGCACGAGCTGGTCACCCACCTGA  
CGGTGGAGCATGTGGGGGGGCGGAGCAGTGAACCACATTTGCTTCTGG  
GAGGACTGCTCCCGGGAAGGGAAACCGTTCAAAGCCAAATACAAACTTGT  
GAAYCACATCAAG-----



-----  
>Ipnops sp

AGCCTTCTCATTTCGAGCTGAACTAAGCCAACCGGGGCCCTTTTAGGTGA  
CGACCAAATCTATAATGTCATTGTCACCGCACACGCTTTCGTAATAATCT  
TCTTCATAGTCATGCCTATTATGATCGGCGGGTTCGGAAACTGGCTGGTC  
CCTCTAATGATCGGAGCCCCTGATATAGCATTCCCCGAATGAATAATAT  
GAGCTTCTGACTTCTTCCCCCTTCTTTCCTCCTCTACTAGCCTCCTCCG  
GAGTAGAGGCTGGGGCCGGAACCGGCTGAACAGTCTACCCACCCCTGGCT  
AGCAACCTCGCACATGCCGGAGCCTCAGTAGACCTAACCATTTTCTCATT  
ACACTTAGCTGGTGTCTCCTCAATTCTAGGTGCTATTAACCTTTATCACAA  
CAATTATTAATATGAAACCCCCAGCCGTTTCTCAATACCAAACCCCTCTA  
TTTGTATGGTCTGTCTGGTTACAGCAGTTTCTCCTCCTCTTTCCCTACC  
TGTCTTGCAGCGGGAATTACCATGCTCCTCACAGATCGAAACTTGAACA  
CTACCTTCTTTGACCCTGCAGGGGGAGGAGATCCCATCCTTTATCAACAC  
TTATTCTGGTTCTTTGGGCACCCAGAAGTATACATTCTCATCCTTCCCGG  
TTTTGGTATAATCTCACACATTGTTGCCTACTACTCCGGCAAAAAAGAAC  
CCTTCGGCTACATGGGTATGGTCTGGGCCATGATGGCCATCGGCCTACTT  
GGATTTATTGTGTGGGCTCACACATGTTTACAGTAGGAATGGACGTAGA  
CACTCGTGCCTATTCCCTTGAGAGGAACCTGCACCCATCCAACCTGCCTTGG  
CATGCTGCTACTGTCAGATGCTCACAGTGCACCAAGCTGTCAGAGCTGT  
CCTGGGGTATGTGTCTCAGCAACTTCCCTGCCATCTGCAAGACGGAGGAC  
TTCTCCAGCTACCCAAAGACATGGTGGTGCAGCTTCTGTCCCATGAGGA  
GCTGGAGACAGAAGATGAGAGACTGGTTTATGAGGCAGCCCTTAACCTGGG  
TCAACTATGACCTGGAGAGGAGACACTGCCACCTGTCAGAGCTGCTGAGA  
ACCGTGCCTGGCCTTGTTACCTGCCATCTTCTCATGGAGAACGTCTC  
CACAGAGGAGCTGATCAATGCCCAAGTAAAGAGCAAGGAGTTAGTGGATG  
AGGCTATCCGCTGCAAGCTGAAGATCCTGCAGAATGACGGTGTGGTCAAC  
AGTCCCTGTGCCCGGCCAGAAAGACCAGCCATGCCCTTTTCTGCTGGG  
AGGGCAGACCTTCATGTGTGACAAGCTGTACTTGGTGGACCAGAAGGCCA  
AAGAGATCATCCCCAAGGCAGATATCCCCAGCCCCAGGAAGGAGTTCAGC  
GCCTGTGCCATCGGCTGTAAGGTCTATGTACAGGCGGGA--GAGGCTC-  
AGAGAACGGCGTGTCTAAAGACGTGTGGGTCTATGACACGGTCCATGAGG  
AGTGGTCTAAGGCAGCACCCATGCTCATTGCCAGGTTTGGCCATGGCTCT  
GCTGAGCTCAAACACTGCCTCTATGTGGTTGGAGGACACACAGCAGCCAC  
TGGCTGCCTCCCAGCTTCTCCGTCTGGATGAGTACATTGTAGTGTTCAGT  
CGTCTACAACAAGGCTGATTCTAAACGAAGCAGAGCTAATCCTGGCACT  
GGCCAGGAGTTTCAGATGAGGGTGGTTACAGTGTCTCTGGAGGAACAGT  
CTTTCCCAGCATCATCCAGGTGATCAGCGCGGCCCTCCATGTTGGTTAGT  
ATGCACGGAGCTCAGCTCGTCACCTCACTCTTCCCTCCCTAGAGGAGCGGC  
TGTAGTGGAGCTCTTCCCCTATGCTGTGAACCCAGAACAGTACACCCCAT  
ATAAAACCCTAGCCTCCCTACCAGGCATGGACCTTCAATACGTTTCCCTGG  
AGGAACACTATTGAGGAGAACACTGTTRTCCACCCAGACAGACCTTGGGA  
CCAAGGAGGCATTGCCCATTTGGAGAAAGACGAGCAGGAGAGAATCCTAG  
CCAGCAAGGATGTCCCAGGCACCTATGCTGCCGCAACCCAGAGTGGCTC  
TTCAGGATCTACCAGGACACTCTGGTGGACATCCCTTCCCTTCCCTGGAAGT  
CCTCAA---GGAGGGCCTGAAG---ACGAGGCCGAGCTTGAAGAA---GT  
CCAAGCCGGCCAGCACGGTTCATCCGGGCCGGGTCCGAGAACCCAGTGC  
CAGACATCAGTCCAAGCCACCAACGAGGCTAAGCTCACGGTATCCTGGCA  
GATCCCCTTGGAACTTAAGTACCTAACGGTGCAGAGGTGAAGTATGATG  
TATGGATCCGGAAGGATTCAAGCAAGGGAACCCCTGGAGGATCAAATC  
ATTCAGGCAAACCCCTGCACTGGAGGCTTTTGGTAATGCCAAAACAGCGAG  
GAACGATAATTCTCCCCTTTTGGAAAATTCATCCGAATTCACTTTGGAA  
CCAGTGGTAAACTTCTCCTGCGGACGTTGAGACCTACCTGCTGGAGAAG

TCACGGATCACCTTTCAGCTTAAGTCAGAGAGGAACTACCACATCTTCTT  
CCAGATCTTGTCCAATCAAAGCCAGAGCTGTTGGACATGCTGTTGATCA  
CAAACAACCCTTATGACTACTCCTACATCTCCCAAGGAGAAGTAACCGTA  
CCATCCATCAATGATTCAGAGGAGTTGATGGCCACTGACAGTGCCTTTGA  
TGTGCTTGGCTTCACTCAAGAGGAGAAGATGGGAGTCTACAAGTTGACAG  
GGGCCATTATGCACTATGGCAACATGAAGTTCAAGCAAAGCAGCGTGAG  
GAACAGGCTGAGCCTGATGGTACAGAGGCTGCTGATAAGTCAGCTTATCT  
AATGGGGCTGAATTCAGCAGACCTCATCAAAGGTCCTGCCATCCCAGAG  
TCAAGGTAGGAAATGAGTATGTCACCAAAGGCCAGGGTGTAGATCAAGTC  
TACTACCCCAACAAGGAGGCTTTCAAGTGTGAAGAGTGTGGCAAGCACTA  
CAACACCAAGCTGGGATACAAGCGCCATGTGGCCATGCACTCTGCCACGG  
CAGGGGACCTCACCTGCAAGGTCTGCATGCAGAGTTACGAGAGCACACCG  
GTGCTCCTGGAACACCTCAAGAGCCACTCTGGGAAGTCCTCGGGTGGCGC  
TAAGGAGAAGAAGCACCCGTGCGACCACTGCGACCGTCGCTTCTACACAC  
GGAAGGATGTCAGGCGGCACATGGTTGTCCACACAGGCCGAAAGGACTTC  
CTGTGCCAGTACTGTGCCAGCGCTTCGGCAGGAAGGATCATCTGACACG  
ACACGTGAAAAAGAGCCACTCGCAGGAGCTGCTGAAGATTAAGACGGAGC  
CTCCAGATATGTTGGGTCTCCTGGGCTCTGGATCGCCGCCTTGCTCTGTC  
AAGGAGGAGCTTAGCCCCATGATGTGCAACATGGGTCCCAATAAAGACCC  
CATGATGGGCAAACCATTCCCCAGCGGGACCCCCCTTCCCATGGGCATGT  
ACAACCCCCACCAC-----CTCCGGGCCATTTCTAATCCAGGCGTGGGC  
CACCCC-----CACCCCTCCCTGATGCCCGGTTCCCTGTCTGCAGCTAT  
GGGCATGAGCTGTCACATGGAATATCTCATCTACGCTTCCTTCTCCTTCA  
TGGGATGTTTACAAATCAGCGACGGGTGCAACATCGTGAATTTGCTGGCC  
ACTAACTCTCCAAGCGTCTCATAACGCTATGACACAGCAGAAGTACTTCAG  
TAACTACAGCCAGTGATCGGGTTTTACATCTATGAGCCCATCGAGTACT  
GGAACTCCACGGTGCAGGAGCACCTGAAGACGCTGAGCCACGGCTTCAAC  
AAGATATCCTGGATGGACAATTTCTTCCACTACCTGCGAGTGGTGAACGT  
GAGTGCCTCGACCAAGGCCGACTTCATCACCGTCCCTCAAGGGCTCCTTCC  
TGCGGAGCCCGGCTTACCAGCACTTCACAGAGGACATCATCTTCTCCAAG  
A---GCCGGGAGAACA-----ATGAGTACGAGATCATTGCCTCGCGCAT  
GTACCTGGTGGCGCGCACCCACGGAGAATAGGCGCGACGAGGTGGTGGAGC  
TGCTGGAGAAGCTCCGGCCGCTGATGCTGATCAACAGCATCAAGTTCATC  
GCCTTCAACCCACGTTTCGTTTCATGGACCGCTACAGCTCCTCGGTCAT  
TTCGCCCATCCTCACCTCGGGCTTCAGCGTGTCTACCATCCTCATCCTCA  
CCTTCTTCTGGTTCATCAACCCGCTGGGGAATTTGTGGCTCATACTGACG  
GTCACGTCCTGGAGCTGGGCGTGTGGGTCTGATGGGCTACCACACATT  
CGAGTGGCAGCCAGCCCTCAAGAATGTGTCCCATCCTGCCATGTGGGTA  
TCATCAATGGGCTCTCTGGGTGGGCTTCCTCTGTGGATGATGCCCTGCT  
GAGACCATCACTCGTTCGTTTTCGTTATGACGTGGCCCTGGTGTGAGCCCT  
GAAGGACCTAGAGGAGGACATAATGGAAGGACTGAGGGAGCGTGGGCTGG  
AAGACAGTGCCTTGACCTCAGGCTTCAGTGTTATGATCAAGGAATCCTGT  
GATGGCATGGGAGATGTCAGCGAGAAGCATGGTGGAGGACCAGCGATGCC  
TGAGAAGGCTGTGCGTTTCTCTATCACCATCATGTCCGTCTCTGTCCAGG  
CCGATGGAGAGGAG-----GAGGCG  
GTTGTCATCTTCAGGGAGCCAAAGCCCAACTCTGAACTGTCCTGTAAGCC  
CCTGTGCCTGATGTTGTGGATGAGTCTGACCATGAGACAGTACCAGCTG  
TCCTGGGGCCTTTGGTAGCAGAGAGGAATGCGATGAAGCAGAGCCGACTC  
ATCCTTTCAGTGGGTGGCCTCCCCCGCTCTTTCCGCTTCCACTTCAGAGG  
CACAGGCTATGATGAGAAGATGGTGCAGAGATGGAAGGCCTGGAGGCCT  
CAGGCTCCAGCTATATCTGCACTCTTTGTGACTCCACTCGGGCAGAAGCC  
TCTCACAACATGGTGTCTCACTCTGTACCCCGCAGCCATGATGAGAACCT  
GGAGCGCTATGAGATATGGAGGACCAACCCCTTCTCAGAGTCTGTCATGG





TCATGTGTGACAAGTTGTACCTGGTGGACCAGAAGGCCAAAGAGATCATC  
CCCAAGGCGGACATTCAGCCCTCGGAAGGAGTTCAGCGCCTGTGCCAT  
CGGCTGTAAGGTGTACATCACAGGTGGGA--GAGGCTC-AGAGAATGGCG  
TGTCAAAGATGTATGGGTCTATGACACCATCCATGAGGAGTGGTCCAAA  
GCGGCGCCCATGCTCATCGCCAGGTTTGGTCATGGCTCTGCTAGCCTGAA  
ACACTGCCNNNNNNNNNNNNNNNNNNNNNNNNNNNNNNNNNNNNNNNNNNNNNNNNNNNNNNNNNNNNNNNNNNNNNNNNNNNNNNNNNNNNNNNNNNNNNNNNNGGATGA  
ATACATTTGTTGCTTTCAGTCGTTCAACAACAAGGCT  
GATACTGAACGAAGCCGAGCTAATCATGGCGCTGGCCCAGGAGTTCCAGA  
TGAGAGTGGTACAGTTTCCCTAGAGGAACAGTCTTTCACCAGCATTTGTC  
GAGGTGATCAGCGGTGCTTCCATGTTAGTCAGCATGCATGGAGCTCAGCT  
TATCACCTCACTCTTCCCTCCCTAGAGGAGCTATTGTGGTGGAGCTGTTCC  
CCTTTGCTGTGAACTCAGAGCAGTACACCCCATATAAAACCCTTGCCTCC  
CTTCCAGGCATGGACCTTCATTATGTTTCCCTGGAGGAACAGTCAGGAGGA  
GAACACTGTCACCATCCAGACAGACCCTGGGAACAAGGAGGCATCGCTC  
ACTTGGAGAAGGAGGAGCAGGAGCGAATACTGACCAGCAAAGACGTCCCC  
AGGCACCTGTGCTGCCGCAACCCGGAGTGGCTCTTCCGAATCTACCAGGA  
CACTTTGGTTGACATTCCTTCTTCTTGGAAAGTCTCAA--GGAGGGAA  
TGAAG--AACAAAGCCAACTTGAAGAA--GTCCAAAACAGCCAGTACA  
GTCCACCCAGGCCGGGTGAGAGAAGCCAGTGTGAGACATCAGTACAAAC  
CACCAATGAGGCTAAACTTACAGTCTCCTGGCAGATCCCGTGGAATCTGA  
AATACCTGAAAGTAAGAGAGGTGAAGTACGAGGTA-----AAAAGA  
GACGCCAGCAAAGGAACCTGAGGATCAAATCATCCAGGCGAACC CGC  
GCTGGAGGCCTTCGAAATGCCAAAACGCTGAGAAAACGACAACCTCGTCCC  
GTTTTGAAAATTCATCCGAATTCACTTCGAAACAGCGGCAAGCTGTCCG  
TCTGCTGACGTGGAGACGTACCTGTTGGAGAAGTCTCGGGTCACCTATCA  
GCTCAAGGCTGAGAGGAACCTACCACATCTTCTACCAGATCCTGTCCAATC  
AGAAGCCAGAGCTGCTGGACATGCTGTTGATCACCAACAACCCGTACGAC  
TACTCCTACATCTCCCAAGGAGAGGTAACAGTCGCCCTCCATCAACGACTC  
GGAGGAGCTGATGGCCACCAGACAGCGCCTTCGATGTGCTCGGCTTCACTC  
CGGAGGAGAAGATGGGCGTCTATAAACTGACCGGCGCCATCATGCACTAC  
GGCAACATGAAGTTCAAGCAGAAGCAGCGTGAGGAGCAGGCGGAGCCTGA  
CGGGACGGAGGCTGTTGATAAATCAGCTTACCTGATGGGGCTGAACTCTG  
CTGACCTCATCAAAGGGCTGTGCCATCCCAGAGTCAAGGTAGGAAACGAG  
TACGTCACCAAAGGCCAGAGTGTGGACCAAGTCTACTACCCCAACAAGGA  
GGCCTTCAAGTGTGAGGAGTGTGGGAAGCACTACAACACCAAGCTGGGAT  
ATAAGCGCCATGTGGCCATGCACTCTGCCACGGCGGGGATCTCACCTGT  
AAAGTGTGCATGCAGAGCTACGAGAGCACCCCTGTTCTCCTGGAGCACCT  
CAAGAGCCACTCGGGGAAGTCTCCTCCGGCGGAGCCAAGGAGAAAAAGCACC  
CGTGCAGCCACTGCGACC GCCCTTCTACACGCGGAAGGATGTGAGACGG  
CACATGGTGGTCCACACAGGCCGAAAGACTTCCCTGTGCCAGTACTGTGC  
CCAGCGCTTTGGCAGGAAGGATCACCTGACCCGACACGTGAAGAAGAGCC  
ACTCGCAGGAGCTGCTGAAGATCAAGACGGAGCCTCCTGACATGTTAAGT  
CTTTTAGCTTCAGGGTACCACCGTGCTCTGTGAAGGAGGAGCTTAGCCC  
CATGATGTGCGGCATGGGTCCCAACAAGACCCCATGATGGGCAAACCAT  
TCCCTAGTGGCGCCCCCTTCCCGATGGGCATGTACAACCCCCACCAC---  
---CTTCAGGCCATGTCTAATTCTGGGGTGGGTGATGCA-----CACCC  
GTCCCTGATGCCAGCCCCCTGTCTGCAGCTATGGGCATGGGCTGT CACA  
TGGAAATATCTAATCTATGCCTCTTCTCATTCATGGGATGTTTACAAATT  
AGTGATGGATCGAACATTTGTGAACCTGCTGGCGAGTAACTCTCCGAGTGT  
TTCGTACGCTCTGACCCAGCAGAAA TACTTACGCAACTACAGTCCCCTGA  
TCGGGTTTTACATTTACGAGCCATCGAGTACTGGAACCTCCACGGTGCAG  
GAGCACCTGAGA ACTCTGAGTACGGCTTCGAGAAGATCTCCTGGATGGA  
CAACTTCTTCCACTACCTGCGGGTGGTGAACGTGAGTGCCTCGACCAAGA

GCGACTTCATCACCATCCTCATGGGCTCCTTCTGCGCAGCCCGGAGTAC  
CAGCACTTCACTGAGGACATCATATTTTCCAAGA---ACCGTGAGACGG-  
-----ACGAATACGACATTATCGCCTCGCGCATGTATTTGATGGCACC  
GACCCGAGAACAAGCGCGAGGAGGTGGTGGAGCTTCTGGAGAAGCTCCGC  
CCCTTGATGCTGATTAACAGCATCAAGTTCATCGCCTTCAATCCACGTT  
TGTGTTTCATGGACCGCTACAGCTCATCCGTCATCTCACCATCCTGACCT  
CAGGCTTCAGCGTGCTCACCATCCTCATCCTCACTTCTTCTGCTGATC  
AACCCCTGGGGAActTCTGGCTCATCCTCACGGTTACATCCGTGGAGCT  
GGGCGTCTTGGNNNNNNNN-----

-----TCATACACCATCGAGATGGGTCCCCTGGGGCC  
CCAATGGAAGGAGAGTCCACAGCCGTTCTCCTGCTCCGTTGAAGACCCCA  
CAAAACAGACAAAGTTCAAAGGCATCAAGACGTACATTTTCGTATCGGGTC  
ACGCCGAGCCACACGGGGCATCCCGTCTACAGGCGCTACAAACACTTTGA  
CTGGCTGTACAACCGCCTGCTGCACAAGTTCACTGTGATCTCCGTGCCTC  
ACCTGCCCCGAGAAGCAGGCCACGGGGCGATTTGAGGAAGACTTTATCGAG  
AAGCGGAAGAGACGACTGATACTGTGGATGAACCACATGACCAGTCACCC  
GGTCTCTCCCAGTACGAAGGCTTCGAGCACTTTCTGATGTGTGCTGACG  
ACAAGCAGTGGAAGCTGGGCAAGAGGGCGAGCTGAGAAGGACGAGATGGTG  
GGCGCCATTTTCATGCTGACCCTCCAGATCCCCAACGAGCACCAGGACCT  
TCAGGACGTAGAGGAGAGAGTGGACACCTTCAAGGCCTTCGCTAAGAAAA  
TGGACGACAGCGTTATGCAGCTCACACATGTTGCCCGGAGCTGGTGCCT  
AAGCACCTGGGTGGATTCAGGAAGGAGTCCAGCGGCTGGGAAATGCCTT  
CCAGTCTATTAGCCAGGCGTTTTCATGCTGGACCCTCCCCATAGCTCAGACA  
CCGTC AANNNNNNNNNNNNNNNN-----



ATGCTTTCGTAATAATCTTCTTTATAGTAATACCAATTATAATTGGAGGT  
TTCGGGAAGTACTAGTCCCCTAATAATTGGAGCCCCAGACATAGCATT  
TCCCCGAATAAATAACATAAGTTTCTGACTACTTCCCCCTCTTCTCTAC  
TCCTTCTTGCCTCTTCCGGGTGTAGAAGCCGGTGTGCTGGCACTGGATGAACA  
GTTTACCCCCCATTAGCCGGAACCTAGCCCATGCAGGAGCATCCGTCTGA  
CCTCACAATCTTCTCCCTTCACTTGGCCGGCGTTTCTCAATCCTAGGAG  
CTATTAATTTTATTACTACAATTATTAATATAAAAACCCCTGCAGTATCT  
CAATACCAAAGTCCGCTATTTGTATGATCCGTTCTTATTACAGCCGTCCT  
CCTTCTCTTATCCCTCCCAGTTCTTGGCCGGGAATTACTATGCTACTCA  
CAGATCGAAATTTAAATACTTCTTCTTTGACCCAGCAGGAGGCGCGAC  
CCCATTCTATATCAACACCTCTTCTGATTCTTCCGGCCACCCAGAAGTTTA  
TATTCTAATCCTCCCGGATTCCGGTATAATCTCCCACATCGTAGCATACT  
ATGCTGGGAAAAAAGAACCATTTGGGTACATAGGCATGGTTTGGAGCCATG  
ATAGCCATCGGCCTACTAGGCTTCATTTGTATGAGCCACCACATATTTAC  
AGTTGGAATAGATGTTGATACACGAGCATANNNNNNNNNNNNNNNNNNNNNNN  
NGCTATTGCTGTCTGACGCCC  
ACCAGTGTACCAAGCTGTCTAGAGCTCTCCTGGGGCATGTGCCTCAGCAAC  
TTCCCTGCTATTTGCAAGACAGAGGACTTCCCTCCAAGTGCACAAAGATAT  
GGTAGTGCAGCTTTTGTACATGAGGAGCTAGAGACGGAAGATGAGAGAC  
TGGTTTATGAAGCTGCTCTCAACTGGATCAACTATGACTTAGAAAAGGAGG  
CACTGCCACCTTCCAGAGCTCCTGAGAACAGTCCGCTTGGCCTGCTGCC  
TGCCATTTTTCTGATGAGAAATGTGTCAACAGAGGAGCTGATCAACGCC  
AGGCCAAGAGCAAGGAGTTGGTGGACGAGGCAATCCGCTGTAAACTGAAG  
ATCCTGCAGAATGATGGTGTGTAAACAGCCATGTGCTCGACCAAGAAA  
AACTAGCCATGCCCTCTTCTTCTGGGAGGGCAGACTTTCATGTGTGACA  
AGTTGTACCTGGTGGACCAGAAAGCCAAAGAGATCATTCCAAGGCAGAC  
ATCCCCAGCCCAAGAAAGGAGTTTCAAGTGCCTGCGCCATTGGCTGTAAGGT  
GTATATAACAGGAGGAA--GAGGCTC-TGAGAATGGTGTGTCCAAGATG  
TGTGGTCTATGACACAGTTTCAAGGAAATGGTCCAAGGCAGCGCCTATG  
CTCATCGCCAGATTTGGCCATGGCTCTGCAGAGCTCAAACACTGCCTCTA  
TGTGGTTGGAGGTCACACCGCAGCGACTGGCTGCCCTCCCGNNNNNNNNNN  
NGGATGAATAC  
ATTGTTGTCTTTAGTCGTTCAACAACAAGGCTGATACTCAATGAAGCAGA  
GCTAATCATGGTACTGGCCAGGAGTTCCAGAAGAGGGTGGTCACAGTAT  
CTCTGGAGGAGCAGTCTTCCCCAGTATCGTCCAGGTGATCAGCGGGCA  
TCTATGTTAGTCAGTATGCATGGAGCTCAGCTTATCACCTCACTCTTCT  
CCCCAGAGGAGCTGTGTGGTTGAGCTGTACCCATTTGCTGTGAACCCAG  
AACAGTACACCCCTTATAAAAACCTTGCATCCCTTCCAGGCATGGACCTT  
CACTATATTTTCAAGGAGAACTAAGGAGGAGAACACTGTACCCACCC  
AGACAGGCCCTGGGAGCAAGGAGGCATCAGCCACTTGGAAAAAAGAAGAGC  
AAGAGCGTATACTGGCCAGCAAAGATGTCCCCAGGCACCTTTGCTGCCGC  
AACCCGGAGTGGCTTTTCCGGATTTACCAGGACACTTTGGTGGACATACC  
TTCATTCTTGGAAAGTCCCTCAA---AGAGGGCATGAAG---ACCAAGCCCA  
TCTTAAAGAA---GTCCAAGCCGGCCAACGCGGTCCACCCAGGCCGGGTC  
AGAGATCCTCAGTGTGACACCTCAGTACAAAACAACAGTGAGGCTAAACT  
CACGGTCTCCTGGCAGATCCCGTGGAAATCTGAAATACCTGAAGGTAAGAG  
AGGTCAAATACGAAGTGNNNNNNNNNAAAAAGGACACCAGTAAGGGGACACT  
GAGGAT  
CAAATCATCCAGGCAAATCCTGCACTGGAGGCCTTTGGCAACGCCAAAAC  
AGTAAAGAAATGACAACCTCATCTCGTTTTGGAAAATTCATCCGAATTCATT  
TCGGAAACAGTGGCAAGTTATCATCTGCCGACATTTAGACTTACCTACTG  
GAGAAGTACGCGTCACCTTTCAGCTTAAGGCTGAGAGGAACTACCACAT  
CTTCTACCAGATTCTGTCCAATCAGAAGCCAGAGCTGCTGGACATGCTGC  
TGATCACCAACAACCCGTATGACTATTCCTACATCTCCAAGGAGAGGTA  
ACAGTTGCCTCCATCAACGACTCAGAGGAACTGATGGCCACTGACAGTGC



CTTTGATGTGCTTGGCTTCACTCCAGAGGAGAAGATGGGTGTCTATAAAC  
TGATCGGTGCCATCATGCACCATGGAAACATGAAGTTTAAACAAAAGCAG  
CGTGAAGAGCAGGCTGAGCCCGACGGGACAGAGGCTGCTGATAAATCCGC  
TTATCTTATGGGGCTGAACTCTGCTGACCTTATAAAAAGGGCTGTGCCATC  
CCAGGGTGAAGGTAGGAAATGAATATGTCATAAAGGCCAGAGTGTGGAC  
CAAGTCTACTANNNNNNNNNNNNNNNNNNNNNNNNNNNNNNNNGGAAGCACTACAACACCAAGCTGG  
GATATAAGCGCCATG  
TGGCCATGCACTCTGCCACTGCAGGGGATCTCACTTGTAAAGTGTGCATG  
CAGAGCTATGAGAGCACGCCTGTGCTCCTGGAGCACCTCAAGAGCCACTC  
TGGGAAATCCTCAGGTGGTGCCAAGGAGAAAAACACCCATGCGACCACT  
GTGACCGCCGCTTCTACACAAGGAAGGATGTGAGGCGGCACATGGTGGTC  
CACACAGGTAGAAAGGACTTTCTGTGTCAGTACTGTGCCAACGCTTCGG  
CAGGAAGGACCACCTGACACGTCATGTAAAGAAGAGCCACTCACAGGAGC  
TGCTGAAGATCAAGACAGAACCCCTGATATGTTAGGTTTGTAGCTTCT  
GGGTCAACACCTTGTCTGTGAAGGAGGAGCTTAGTCCCATGATGTGTGG  
CATGGGTCCCAATAAAGACCCTATAATGGGAAAACCTTTCCCCAGTGGAG  
CCCCCTTTCCTATGAGCATGTACAACCCCCACCAT-----CTCCAGGCC  
ATGTCTAATTCTGGCGTGGGTTCATCCA-----CACCTTCCCTAATGCC  
CAGTTCCTCTATCTGCAGCTATGGGCATGGGCTGCCANNNNNNNNNNNNNNNNNNNNNNNNNNNNNNNNNNN  
NNNNNNNNNNNNNNNNNNNNNNNNNNNNNNNNNNNTGAACCTGCTGGCT  
AGTAACTCTCCAAGTGTTCGTATGCTCTGACCCAACAGAAATACTTCAG  
TAACTACAGTCTGTGATTGGGTTTACATTTATGAGCCTATTGAATACT  
GGAACTCCACAGTGCAAGAACACCTAAAGACTCTGAGTCACGGATTCAAC  
AAGATCTCCTGGATGGACAACCTTTTCCACTACTTGCGGGTGGTGAATGT  
GAGTGCATCAACCAAAAAGCGACTTCATTAGCATCCTCAAGGGCTCCTTCC  
TGCGCAGCCCGGAGTACCAGCACTTCCCGAGGACATCATATTCTCCAAG  
A---ATCGCGAGACTG-----ACGAGTATGACATTATTGCCTCACGCAT  
GTATTTGGTGGCACGCACCACGGAGAAGAAGCGTGAGGAGGTGGTGGAGC  
TTTTAGAAAAGCTTCGCCCTTGTATGTTGATCAACAGCATCAAGTTCATT  
GCCTTCAATCCACGTTTGTGTTTCATGGACCGCTACAGTTCCTCTGTCTAT  
CTCACCCATTCTAACCTCAGGCTTCAGTGTGCTCACCATTCTCATCCTCA  
CTTTCTTCTGGTTCATCAACCCATTGGGAAACTTCTGNNNNNNNNNNNNNNNNNNNNNNNNNNNNNNNNNNN  
NNNNNNNNNNNNNNNNNNNGGCTTCCACCAGT  
TTGAATGGCAGCCAGCTCTCCAGAATGTGTCTACATCTTGCAATGTTGGC  
ATTATTAATGGGCTCTCTGGGTGGACATCTTCAGTGGATGACTCCCAGC  
TGACACAATCACGAGGCGCTTTCGCTACGATGTGGCGCTGGTGTGAGCAT  
TAAAAGATCTGGAGGAGGACATTATGGACGGGCTGAGAGAGCGTGGGATG  
GAAGATAGCACTTGCACCACAGACTTCAGAGTTATGATCAAGGAAGCCTG  
TGACGGCATGGGTGATGTCAGTGAGAAGCATGGAGGAGGTCTGTCAGTTC  
CTGAGAAGGCTGTTTCGTTTCTCTTCACTATTATGTCGTGTCTGTCAAG  
GCAGAGGAGGAGAAT-----GCAGA  
AGTTAGCATCTTACGGAGCCAAAGCCAAATTCAGAAGTGTCTGTAAGC  
CCCTTGTGCTGATGTTGTGGATGAATCCGACCATGAGACACTCACAGCT  
GTCTTGGGGCCGATAGTTGCAGAGCGTAATGCAATGAAACAGAGTAGGCT  
CATCCTATCCATAGGTGGCTTACCCCGATCCTTCCGCTTTCACTTTAGAG  
GCACAGGATATGATGAGAAGATGGTGCCTGAGCTGGAGGGCCTGGAGGCC  
TCAGGATCCACATATGTTTGCACCCCTGTGTGACTCCAGTCGAGCAGAGGC  
CTCTCAAATATGCTACTGCACTCCATCACC CGCAGTCATGAAGAGAACC  
TAGAACGTTATGAAAATTTGGAGAACGAACCCCTTTTCAGAATCTACAGAT  
GAGCTGCGAGACAGAGTCAAAGGGTCTCAGCTAAACCTTTTATGGAGAC  
CCAACCCACACTGGATGCATTACACTGTGACATTGGCAATGCCACTGAGT  
TCTACAAAATGTTCCAGGATGAGATTGGGGAAGTGTATCAAAGGT---C  
AAC---CCCAGCCGTGAGGAACGGCGCAGTTGGAGGGCAGCCTTAGATAA





-----  
-----  
-----GGACGAGTACATCGTGGTGTTCAGC  
CGCTCCACCACGAGGCTCATCCTGAACGAGGCCGAGCTGATCATGGCACT  
GGTGCAGGAGTTCCAGATGAAGGTGGTCACCGTGTCTCTGGAGGAGCAGT  
CCTTCCCCAGCATCGTCCAGGCGGTGAGCGGCGCTCCATGCTGGTCAGC  
ATGCACGGGGCTCAGCTGATCACGTCGCTTTTCTGCCCAGAGGCGCCGC  
CGTGGTGGAGCTGTTCCCCTTTGCGGTGAACCCGGAGCAGTACACCCCGT  
ATAAGACTCTGGCCTCGCTGCCCGCATGGACGTCCACTACGTCTCCTGG  
AGGAACACCATGGAGGAGAACACCGTCACCCACCCGGACCGGCGTGGGA  
GCAAGGCGGCATCGCTCACTTGGAAAAGGAGGAGCAGGAGCGGATCCTGG  
CGAGCAAGGACGTCCCCAGACACCTGTGCTGCCGCAACCCGGAGTGGCTC  
TACAGGATCTACCAGGATACGACGGTGGACGTCCCCTTTTCTGGAAGT  
CCTCCG---AGAAGGCATGAAG---ACCAAGCCCAACCTGAAGAA---GG  
CCAGAGCCCGCAGCATCGTCCACCCGGGCGGGTCCGAGAGCCCCAGTGT  
CAGACCTCGGTGCAGACCAGCAGCGAGGCCAAGCTGACGGTGTCTGGCA  
GATCCCCTGGAACCTCAAGTACCTGAAGGTCCGAGAGGTGAAGTACGAGG  
TGTGGATCCAGAAGAAGGACACCAGCAAAGGGACCTTGGAGGATCAAATA  
ATCCAGGCAAACCCGGCGCTTGAGGCCTTTGGCAAACGCAAGACGCTGAG  
GAATGACAACCTCCTCCAGTTTTGGAAAATTCATCCGGATTCACTTCGGCA  
CCAGCGGCAAGCTGTCTTCAGCCGACATCGAGACGTACCTGTTGGAGAAG  
TCCCGAGTCACCTTTCAGTTGAAGCTGAGAGGAACTACCACATCTTCTA  
CCAGATCCTGTCCAATCAAAGCCAGAGCTGCTGGACATGCTCCTGATCA  
CAAACAACCCCTTATGACTACTCCTACATCTCACAGGGAGAAGTGACAGTC  
GCCTCAATCAATGATGCGGAGGAGCTCATGGCGACTGACAGTGCCTTCGA  
TGTGCTCGGCTTTACATCGGATGAGAAAATGGGTGTCTACAAGCTGACCG  
GTGCCATCATGCACCACGGCAACATGAAGTTCAAACAGAAGCAACGCGAG  
GAGCAGGCGGAGCCCGATGGGACCGAGGCTGCTGACAAGTCTGCCTACCT  
GATGGGGCTGAACTCAGCTGACCTCATTAAGGGTCTGTGCCACCCAGGG  
TCAAAGTAGGAAACGAGTACGTGACAAAAGGACAAAAGTGTGGACCAGGTG  
TACTATCCAAACAAGGAGGCCTTCAAGTGCAGGAGTGTGGGAAGCACTA  
CAACACCAAGCTGGGATACAAGCGCCATGTGGCCATGCACTCCGCCACCG  
CGGGGATCTCACCTGCAAAGTGTGCATGCAGAGCTATGAGAGCACGCCT  
GTCCTTTTGGAGCATCTCAAAGCCACTCGGGAAAATCCTCCAGTGGCAC  
CAAGGAGAAGAAACACCCATGTGACCACTGCGACCGCGCTTCTACACGC  
GGAAGGACGTGCGGCGGCACATGGTTGTCCACACTGGCAGAAAAGACTTC  
CTGTGTCAGTACTGTGCCAGCGCTTTGGCAGGAAGGACATTTGACGCG  
CCACGTGAAAAAGAGCCACTCACAGGAGCTTCTGAAGATCAAGACAGAGC  
CCCCTGACATGCTCGGGCTTTTAGCCACGGGCTCGCCACCGTGTCCGTC  
AAGGAGGAGCTCAGCCCCATCATGTGTGGCATGGGGCCCAACAAAGACTC  
GGTGATGGGCAAACCATTTCCCGGCGGGGCCCCGTCCCCATGGGCATGT  
ACAACCCCAACCAC-----CTCCAGGCCATGTCCAATTCCGGGGTGGGT  
CACCT-----CACCTTCCCTGATGCCCGGCTCCTTGTCTGCAGCTAT  
GGGCATGGGATGCCACATGGAANNNNNNNNNNNNNNNNNNNNNNNNNNNNNTGTTTACAGATCAGC  
GACGGGTCAATA  
TCGTGAACCTGCTGGCGAGCAACTCCCCGAGCGTTTCGTACGCGCTCACG  
CAGCAGAAGTACTTCAGTAACTACAGCCCGGTGATCGGGTTCTACATTTA  
CGAGCCATCGAGTACTGGAACCTCACGGTGCAGGAGCACCTGAAGACCC  
TGAGTCACGGCTTCAACAAGATCTCTGGATGGACAACCTTTTCCACTAC  
CTGCGGGTGGTGAACGTGAGCGGTCGACGAAGAGCGACTTCATCAGCAT  
CCTCAAGGGCTCCTTCCCTGCGGAGCCCGGAGTACCAGCACTTCACCGAGG  
ACATCATATTCTCCAAGA---ACCGCGAGACCG-----ACGAGTACGAC  
ATCATCGCGTGCAGGATGTACCTGGTGCAGCGGACCACGGAGAAGAAGCG

CGAGGAGGTGGTGGAGCTCCTGGAGAAGCTCCGCCCCCTGATGCTGATCA  
ACAGCATCAAGTTCATTGCCTTCAACCCACCTTCGTGTTTCATGGATCGC  
TACAGTCTCCTCCGTCATCTCGCCATCCTGACCTCAGGCTTACAGCGTGCT  
CACCATCCTCATCCTCACTTTCTTCTGGTTCATCAACCCCTTGGGAACT  
TCTGNNNNNNNNNNNNNNNNNNNNNNNNNNNNNNNNNNNNNNNNNNNNNNNNNNNNNNNGGTTTTACCAGTTTGA  
ATGGCAGCCAGCTCTCAAGAATGTGTCG  
ACATCTTGCAACGTTGGCATTATTAATGGGCTCGCCGGATCAGCTGCCTC  
GGTGGATGACGCCCCGGCTGACACCATCACTCGGCGTTTTCGCTATGATG  
TGGCACTGGTGTGAGCACTAAAGGATCTGGAGGAGGACATCATGGAGGGG  
CTGAGAGAGAATGGGATGGAAGACAGCGCTTGCACCTCAGGCTTTAGTGT  
TATGATCAAGGAGTGTGTGATGGCATGGGTGATGTCAGCGAGAAGCACG  
GTGGAGGACCAGCTCTTCCCAGAAAGGCTGTACGTTTCTCTTTCACTGTT  
ATGTCTGTCTCTGTCTGGCAGGCGATAGGGAG-----  
-----GAGGAGGTTACCATTTTCACTGAGCCAAAGCCAAACT  
CAGAACTGTCTGTAAAGCCCCTCTGCCTGATGTTTGTGGATGAGTCAGAC  
CATGAGACACTCACAGCTGTCTGGAGCCTATAGTTGCAGAGCGAAAGGC  
CATGAAAGAGAGCAGGCTCATCCTGTCCATGGGCAACTTGCTCCGCTCTT  
TTTCGCTTCCACTTACAGGGCACGGGATACGACGAGAAGATGGTGCCTGAG  
ATGGAGGGACTGGAAGCCTCGGGGTCACATACGCTTGCCTCTGTGTGA  
CACCAGTCGTGCCGACGCTTTCAGAGAACATGGTCTTGCCTCCATCACC  
GCAATCATGTGGAGAACCCTAGACCGTTACGAAATATGGAGGACCAACCCT  
TTTTTCGGAGTCAGTGGAGGAGCTGCGGGAGAGAGTCAAAGGCGTCTCTGC  
CAAGCCCTTTTTGGAGACTCAGCCACACTCGATGCATTGCACTGTGACA  
TTGGCAACGCCACTGAGTTCTACAAAATCTTCCAGGACGAGATTGGGGAA  
GTTTACAAAAGGT---CAAC---CCCAGCCGGGAGGAACGGCGCAGCTG  
GCGGGCAGCCCTAGATAAACAGCTGAGGAAGAGGATGAAGCTTAAACCAG  
TAATGAGGATGAATGGGAACATGCCCGCAGGCTAATGACCCAAGAGGCT  
GTGGAGGTGGTGTGTGAGCTGGTGCCCTCAGAGGAGAGGAGGGAGGCCCT  
GAGGGAGCTTATGAGGCTCTATATTCAGATGAAGCCCGTGTGGCGTGCCA  
CCTGCCAGCCAAGGAGTGCCCTGACCAGCTGTGCCGCTACAGTTTTAAC  
TCACAGAGCTTCGCCGACCTCCTCTCCTCTACCTTCAAATATAGGTACAA  
TGAAAAGATAACCAATTATCTGCACAAGACCCTTGCTCACGTGCCCGAGA  
TCATTGAGCGAGATGGATCTATCGGAGCCTGGGCCAGCGAGGGGAGCGAG  
TCGGCTAACAAATCGTACAACATCGAGATGGGGCCCTGGGCCCCCGGTG  
GAACGACAACCCACAGCCCTTCTCCTGCTCCATCGAAGACCCCAAGC  
AGACCAAGTTCAAAGGCATCAAGACCTACATTTTATACCGGGTACGCGG  
AGCCACACGGGACACCCCGTGTACAGGCGATACAAACACTTTCGACTGGCT  
CTACAACCGCCTGTTGCACAAGTTCATGTTGATCTCCGTGCCTCACCTGC  
CCGAGAAGCAGGCCACGGGACGCTTCGAGGAGGACTTCATCGAGAAGCGC  
AAGAGGCGGCTGATCCTGTGGATGAACCACATGACCAGCCACCCGGTCTCT  
CTCCAGTACGAGGGCTTCGAGCACTTCCTCATGTGCGCCGACGACAAGC  
AGTGGAAGCTGGGCAAGAGGCGGGCGGAGAAGGACGAGATGGTGGGCGCC  
CACTTCATGCTGACCCTGCAGATCCCCTGAGCACCAGGACCTGCAGGA  
CGTCGAGGAGCGGGTGGACAACCTTCAAGGCCTTCGCCAAGAAGATGGACG  
ACAGCGTGTGAGCTCACGCACGTCGCCTCGGAGCTGGTGCAGCAAGCAC  
TTGGGTGGATTTCAGGAAGGAGTTCAGAGGCTGGGGAACGCGTTCAGTC  
CATCAGCCAGGCGTTCATGCTGGACCCGCCCCACAGGTCGGACACCCTCA  
ACAACGCCATNNNNNNNNNNNNNNNNNNNNCGTTCTCAAACCTGACCTCTCTCGGTTTCATCATTTGGCGT  
CRGTGTGGTTGGAAAACCTCCTGATCTCCATCCTGCTGGTCAAAGACAAGA  
GCCTGCACCGAGCGCCCTACTATTTCTGCTGGACCTGTGCGCCTCCGAT  
ATCCTGCGATCTGCCATTTGCTTCCCCTTTGTCTTCACGTCCGGTCAAAA  
TGGGTCTGCGTGGACCTACGGCACGTTGACCTGCAAGGTGATCGCCTTCC  
TCGGGGTGTCTCTGTTTCCACACGGCGTTTATGCTCTTCTGTGTCAGC

GTGACCCGTTACCTGGCCATCGCACATCACCGTTTCTACACCAAGCGGCT  
GACTTTCTGGACGTGCTTGGCTGTCATCTGCATGGTGTGGACGCTATCCG  
TGGCTATGGCGTTCCCGCCGGTGTGGACGTAGGGACGTACTCGTTCATC  
CGGGAGGAGGACCAGTGCACGTTCCAGCACCGCTCCTTCAGGGCCAACGA  
TTCGCTGGGCTTCATGCTCCTGCTGGCGCTCATCCTCCTCGCCACACAGC  
TGGTTTACCTCAAGTTCATCTTCTTCGTCCACGACCGTCGAAAGATGAAG  
CCCGTCCAGTTCGTGCCTGCCGTGAGCCAGAACTGGACCTTCCACGGGCC  
GGGCGCCAGCGGGCAGGCGGGCCAACTGGCTGGCTGGATTTCGGTCGAG  
GCCCCACCCCGCTACTTTGCTGGGTATCCGTGAGAACAGCAACGCAGCG  
GGCCGAGGCGTCTACTGGTATTAGATGAATTCAAACAGAGAAGCGGAT  
TAGTAGGATGTTTACATCATGACGTTTTTCTTCTGGCACTCTGGGGGC  
CCTACCTGGTCGCCTGCTACTGGCGGGTGTGTTGCGAGGGGCCCTGTAGTT  
CCTGGGGGCTACCTGACAGCAGCCGTGTGGATGAGCTTCGCTCAGGCTGG  
GGTCAATCCTTTCATCTGCATTTTCTCCAACAGGGAGGCCAAATCTCGCT  
TTCACCCTGGCGTGGGGACTGGTCTGGCACGGAGC---GCAGCGTCCCA  
CTCGGCAACAGCTTGCTATCCCCGCAGCAAACCGAGGAGCCCACTGTTGC  
CACCCCCCGCAGCGATGGTTTTGTCACCC---CTGCCAACAACCGACTGG  
ACTTTGCTGCCTCGGCATACGACGCCGCG-----GATTTCCGCCGGT  
AACCGGGCCACCTTGCTGTCCTACGCAGCGGCCGGAGTGAAGGCTC----  
--TTCCCCTGCCGACTGCAGGCTGCTCCAATCGGCCCTTGGCTATTACG  
CAGACCCGTCTG---GCTGG---GGAGGACGCACGCCGCCGAGTACTGT  
GGCGTAAATAGTAAATCCAGCTCGGTCTTTTCTGCTGGCCCCGGAACCTC  
CATCGGCGGCCGAGCGGGG---CC---AACTACCTGT-----CCG  
AGGA---GGGC---GACTC---CATCACGACGGAGAGGTGCCCC---AT-  
--CGGCGGCTCGGAGGAG---ACCAAACCCAAAGACATGAC---GTCCGA  
---GTCGAGCTGGATAGAG---ACGCCGTCTCCATTAAGTCAATCGATT  
CCAGCGACTCTGGCATCTTTG---AGCAGGCCAAACGGAGGAGAATCTCC  
CCCTCAGCCACGCCG-----GTTTCAGGGACAGTTTCCCCGTTAAA  
ATCGGAGNNNNNNNNNNCAGGCGAAGTCAAGAGAGAGAAGTGGCGTTGGGGATAAATCC  
GTTTCGAGATGGGATGGGCGCCTTCAAATAAACCACAGCTCCCACGATA  
TTGGCTCCGG---ACAGACGGCGTTTCTCCTCCAGGCG---CCCGCTAC  
---GCGGCAGCCGCACTGGGA---CACCACCA-----CCACCCGACCCA  
CGTTGGCTCT---TACTCCACGGCGGCTTTCAACTCCACCAGGGACTTTC  
TCTTCAGAAATCGGGGTTTCGGGGATGCCACCGG-----GGCG  
CAGCACAGTTTGTTCGCCTC-----CGGAAGTTT---C-----GC  
AGGGCCACATGGACACTCAGATGCAGCGGGGCACCTGCTCTTCCCGGGGC  
TCCACGAG---CAAGCGGCAGCCACGCGTCTTCGAACGTGGTCAACAGC  
CAGATGCGGCTGGGCTTCTCGGGGGACATGTACGGACGGGCCGACCAGTA  
CGGCCACGTTACGAGCCCAGGT---CCGACCACTATGCTTCGACCCAGC  
TGCACGGCTACGGCCCATGAACATGAATATGGCCGCA---CACCACGGA  
GCAGGGGCCTTCTTTCGATACATGAGGCAGCCCATCAAACAAGAGCTCAT  
CTGCAAGTGGATCGAGCCGGAGCAGCTGACGAATCCCAAAAAGTCGTGCA  
ACAAAACCTTTCAGCACGATGCACGAGCTGGTGACCCATCTGACGGTGGAG  
CATGTGGGGGGACCCGAGCAGACCAACCACATTTGCTTCTGGGAGGAATG  
CGCCAGAGAAGGGAAACCGTTCAAAGCCAAATACAACTTGTAATCATA  
TCAGAGTTCACACCGGAGAAAAGCCCTTCCCGTGTCCGTTCCCCGGCTGT  
GGCAA

>Lachnolaimus maximus

AGCCTTCTCATTTCGAGCAGAACTAAGCCAACCAGGCGCCCTTCTAGGGGA  
CGACCAGATTTATAACGTCAATTGTTACGGCGCATGCATTTGTAATAATTT  
TCTTTATAGTAATGCCAATTATGATTGGAGGGTTTGGAACTGACTTATC  
CCACTAATAATTGGAGCCCCTGACATGGCTTTCCCCGAATAAACAACAT  
AAGCTTTTACTTCTCCACCTTCATTTCTTCTCTTGGCATCCTCAG









AGAGAGAAGTGGCGTTGGGGATAAATCCGTTTGCAGATGGGATGGGCGCC  
TTCAAATAAACACAGCTCCCACGATATCGGCTCCGG---ACAAACGGC  
GTTTTCTCCAGGCG---CCCGCTAC---GCAGCAGCCGCCCTGGGA-  
--CACCACCA-----TCACCCGACCCACGTTGGCTCT---TACTCCACG  
GCGGCGTTCAACTCCACCAGGGACTTCTCTTCAGAAATCGGGGTTTCGG  
GGATGCAGCCGG-----GGCGCAGCACAGTTTGTTCGCTTC--  
-----CGGAAGTTT---C-----GCAGGGCCACATGGACACTCAGAT  
GCAGCGGGACACCTGCTCTTCCCGGGGCTCCACGAG---CAAGCTGCGAG  
CCACGCGTCTTCCAACGTGGTCAACAGCCAGATGCGGCTGGGCTTCTCGG  
GGGACATGTACGGAAGGGCCGACCAGTACGGCCACGTTACGAGCCCGCGG  
T---CCGACCACTACGCCTCGACCCAGCTGCACGGCTACGGCCCCATGAA  
CATGAATATGGCCGCA--CACCACGGAGCAGGGGCCTTCTTTTCGGTACA  
TGAGGCAGCCCATCAAACAAGAGCTCATCTGCAAGTGGATCGAGCCGGAG  
CAGCTGACGAACCCCAAAAAGTCGTGCAACAAAACTTTTAGCACGATGCA  
CGAGCTCGTGACCCATCTGACGGTGGAGCATGTGGGGGGACCGGAGCAGA  
CGAACCACATCTGCTTCTGGGAGGACTGCGCCCGAGAGGGGAAGCCGTTT  
AAAGCCAAATACAAACTTGTGAATCATATCAGAGTACACACCCGGAGAGAA  
GCCCTTCCCGTGCCCGTTCCCGGCTGTGGCAA

>*Lactophrys triqueter*

AGCCTACTCATCCGAGCAGAAGTGGGCAACAGGCGCTCTCCTTGGGGA  
TGATCAGATTTACAATGTTATTGTCACGGCACATGCATTCGTGATAATTT  
TCTTTATAGTTATACCCATCATAATCGGAGGTTTTGGAAACTGACTAGTC  
CCATTAATAATTGGGGCCCCGACATAGCATTTCGCCGAATAAATAACAT  
AAGCTTTTACTTCTTCCCCCTTCTTTCTTCTCCTAGCTTCATCAG  
GAGTTGAAGCAGGGGCAGGAAGTGGTGGACAGTTTACCCGCCCTTAGCA  
GGAAACCTAGCACACGCGGGAGCATCCGTAGATTTAACTATTTTTTCACT  
TCATCTAGCGGGAGTCTCCTCAATTCAGGGGCTATTAATTTTATTACCA  
CCATTATTAACATAAAACCCCTGCTATCTCTCAATATCAAACCCCTTA  
TTTGTGGGCTGTCTTAATTACCGCGTTCTTCTCCTCTTATCTCTACC  
AGTTCTTGCTGCCGGCATCACAATGCTCCTAACAGACCGAAATCTCAACA  
CCACCTTCTTTGACCCAGCAGGAGGCGGAGACCCAATCCTCTACCAACAC  
CTATTCTGATTCTTCGGTCA-----

-----  
-----  
-----TTTCTAGAGAGAAACCTTACCCATCTAACTGCCTTGG  
CATGCTATTACTGTCTGATGCCACCAGTGCACCAAGCTGTCAGAGCTCT  
CCTGGGGCATGTGCCCTCAGTAACTTCCCGCTATTTGCAAGACAGAGGAC  
TTCTCCAACCTGCCCAAAGACATGGTGGTTTACGCTTTTGTACACGAGGA  
GCTAGAGACTGAAGATGAAAGACTGGTTTATGAAGCAGCGCTCAATTGGA  
TCAACTATGACCTGGACAAGAGGCATGGCCACCTTCCAGAGCTCCTGAGA  
ACGGTCCGCCTAGCCCTTCTGCCTGCCATCTTTCTCATGGAGAATGTTTC  
TACAGAAGAGTTGATCAACGCCCAAGCGAAGAGCAAGGAGCTGGTGGATG  
AAGCTATCCGCTGTAAGCTGAAGATCCTGCAGAATGATGGCGTTGTCAAC  
AGCCCATGTGCTCGACCAAGAAAAACAGCCATGCCCTCTTTCTTCTGGG  
TGGGCAGACTTTCATGTGTGACAAGTTGTACCTGGTGGACCAGAAAGCCA  
AAGAGATCATCCCCAAGGCTGACATTCCTAGCCCCAGGAAGGAGTTCAGC  
GCCTGCGCCATTGGCTGTAAGGTGTATATCACTGGTGGGA--GAGGCTC-  
AGAGAACGGTGTGTCCAAAGATGTGTGGGTCTACGACACTGTCCACGAGG  
AATGGTCAAAGGCCGACCCATGCTCATTTGCTAGGTTTGGCCATGGCTCT  
GCAGAGCTGAAACACTGCCTCTACGTGGTAGGAGGTCACACTGCAGCAAC  
TGGTTGCCTCCCGGCTCTCCGCTGGATGATTATATTGTTGTATTTAGT  
CGTTCAACAACAAGGCTCATACTGAATGAAGCAGAGCTAATTATGGCTCT

GGCCAGGAGTTCCAGATGAGAGTGGTCACGGTATCTCTGGAGGAGCAGT  
CCTTTCCCAGTATCGTCCAGCTGATCAGCAGTGCTACCATGTTAGTCAGT  
ATGCATGGAGCTCAGCTTATCACCTCACTTTCCCTCCCCAGAGGAGCTGT  
TGTGGTTGAGCTGTTCCCTTTTGTGTGAACCCAGAACAATATAACCCAT  
ATAAAAACCTTACCTCCCTTCCAGGCATGGACCTTCACTATATCTCCTGG  
AGGAACGCTAAGGAGGAAAACACCATCACCCACCCAGACAGACCTGGGA  
TCAGGGGGGCATTGTTACCTAGAGAAAAGAGGAGCAAGTGCAAATACTGG  
CGAGCAAAGATGTCCCAGGCACCTGTGCTGCCGAATCCANAGTGGCTTT  
TCCTGATCTACCACGACACTTTGGTGGACATCCCTTCTTTCTGGAAGTC  
CTCAA---AGAGGGCTTGAAG---ACAAGGCCAGTCTGAAGAA---GTC  
AAAGCCAGCCAGCACACTTTCATCCAGGCCGAGTCAGAGAACCTCAGTGTC  
AGACCTCGGTACAAAACCACCAATGAGGCTAAACTCACAGTATCCTGGCAG  
ATTCCATGGAATCTGAAATACCTAATGGTCCGAGAGGTGAAATACGAGGT  
GTGGATCCAGAGAAAAGACACCAGCAAGGGGACACTGGAGGATCAAATCA  
TCCAGGCAAACCCGGCGCTGGAGGCCTTTGGCAACGCCAAAACACTGAGA  
AATGACAACCTCGTCTCGTTTTTGGAAAATTTATCCGAATTCACTTTGGTAC  
GAGTGGCAAGCTGTCATCTGCTGACATTGAGACATACCTACTGGAGAAGT  
CACGGGTACCTTCCAGCTCAAGGCTGAGAGAAAATTACCACATCTTCTAC  
CAGATCCTGTCCAATCAAAGCCAGAGCTGCTTGACATGCTGCTGATCAC  
CAACAACCCATACGACTACTCCTACATCTCCAAGGAGAGGTATCAGTCG  
CCTCCATCAACGACTCAGAAGAGTTGATGGCCACCGACAGTGCCCTTCGAT  
GTGCTTGGCTTCACTCCAGATGAGAAGATGGGTGTCTACAAACTGACGGG  
AGCCATCATGCACTACGGCAACATGAAGTTCAAACAGAAACAGCGTGAGG  
AGCAGGCTGAGCCCGATGGGACAGAGGCTGCTGATAAATCGGCTTACCTA  
ATGGGGCTGAACTCTGCAGACCTCATCAAAGGGCTGTGCCACCCAGAGT  
CAAGGTAGGAAATGAATATGTGACCAAAGGCCAAAGTGTGGACCAAGTCT  
ATTACCCCAACAAGGAAGCCTTCAAGTGTGAAGAATGTGGGAAGCACTAC  
AATACCAAGCTCGGATATAAGCGCCATGTGGCCATGCACTCTGCCACGGC  
AGGTGATCTCACCTGTAAAGTATGCATGCAGACCTATGAGAGCACACCTG  
TGCTTCTGGAGCACCTCAAGAGCCATTCTGGGAAGTCCTCTGGGGGCACC  
AAGGAGAAGAAACACCTTGTGACCCTGTGACCGTCGTTTTCTACACAG  
AAAGGATGTGAGACGGCACATGGTGGTCCACACAGGACGAAAGGACTTTC  
TATGCCAGTACTGCGCCAGCGCTTGGTAGGAAAGACCATCTGACACGC  
CATGTAAAGAAGAGCCACTCGCAGGAGCTACTGAAAATCAAGACAGAGCC  
GCCTGATATGTTGGGCCTTTTAGCTTCTGGGTACCACCTTGCTCYGTGA  
AGGAGGAGCTCAGCCCAATGATGTGTGGCATGGGTCCCAACAAAGATCCC  
ATGATGGGCAAACCGTTCCCAGCGGAGCCCCTTTCCAATGGGCATGTA  
CAACCCCAACAC-----CTCCAGGCCATGTCTACTTCTGGGGTGGGTC  
ACCCA-----CACCCGTCCCTAATGCCNCTTCTTGTCTGCAGCTATGA  
GCATGGGCTGTATATGGAANNNNNNNNNNNNGCATCTTCTCATTCATGGGATGTTTACAA  
ATCAGTGATGGATCAAATATTGTGAACTTGTGGCCAGTAACTCTCCAAG  
TGTTTCATATGCTTTGACCCAGCAAAAATACTTCAGTAACTACAGTCCTG  
TGATTGGGTTTTATATTTATGAGCCATTGAGTACTGGAACCTCGACAGTG  
CAGGAGCACCTGAAGACTCTTAGTCATGGCTTCAATAAGATCTCCTGGAT  
GGACAACTTTTTCCACTACTTGAGGGTGGTGAATGTGAGTGCGTCAACCA  
AGAGTGACTTCATCACCATCCTCAAGGGCTCCTTCTTGCGCAGCCCTGAG  
TACCAGCACTTCACTGAGGACATCATATTCTCTAAGA---ACCGTGAGAC  
TG-----ACGAGTATGACATTATGCTTCAAGGATGTAAGTGGTGGCAC  
GGACAACAGAGAAGAAGCGCGAAGAGGTGGTGGAGCTTCTGGAAAAGCTT  
CGTCCACTGATGCTGATCAACAGCATCAAGTTCATGCTTCAATCCAAC  
ATTTGTGTTTCATGGACCGCTACAGCTCCTCTGTCACTCGCCTATCCTGA  
CCTCAGGATTCAGCGTACTCACAATCCTCATCCTCACTTTCTTCTTGGTA  
ATCAACCCCTTGGGTAACCTTCTGGCTCATCCTCACTGTAACGTCCGTAGA

GCTTGGGGTATTGGGTCTGATGGGCTTTCACCAGTTTGAATGGCAGCCAG  
CTCTCAAGAATGTGTCTACATCTTGCAATGTAGGAATTATTAATGGGCTC  
TCTGGATGGGTTTTCTTCAGTGGATGACTCCCCAGCTGACACCATCACTCG  
GCGGTTTCGCTATGATGTAGCACTGGTGTGAGCGTTAAAGGATCTGGAAG  
AGGACATCCTGGAAGGGCTGAGAGAAAATGGAATGGAGGATAGAGCTTGC  
ACCTCAGGCTTCAGTGTTCATGATCAAAGAATCCTGTGATGGCATGGGCGA  
TATCAGCGAGAAGCACGGTGGAGGACCAGTTGTTCCGAGAAGGCTGTGC  
GTTTTTCTTTCACTATTATGTCTGTCTGTCTGCTGGCAGACGGTGACGAA  
-----GATGAAGTGAGAATCTACAC  
AGAGCCAAAGCCAAACTCAGAGCTGTCGTGTAAGCCCCTTTCCTGATGT  
TTGTGGATGAATCAGACCATGAGACACTCACAGCCATTCTGTGGCCAATA  
ATCGCAGAGCGTAAACGCAATGAAAAGAGAGCAGACTCATTCTATCCATCGG  
TGGACTATCTCACTCCTTCCGGTTTCACTTCAGAGGCACAGGATATGATG  
AGAAGATGGTGCGTGGAGTGGAGGGCCCTCGAGGCCCTGGATCCACTTAC  
ATCTGCACTCTTTGTGACTCTAGTCGCGCAGATGCCTCTCAAAAACATGGT  
GCTACACTCCATCACTCGCAGTCAAGAGGAATCTAGAACGTTATGAAA  
TATGGAGAACTAACCCCTTTTCTGAGTCTGTGCGACGAGCTCCGAGACAGG  
GTCAAAGGGGTCTCTGCCAAGCCCTTTCATGGAAAACCCATCCACATGGGA  
CGCACTACACTGTGACATAGGCAATGCCACTGAGTTTTACAAAATCTTCC  
AGGATGAGATTGGGGAGGTGTACCTGAAGGT---CAAC---CCCAGCCRG  
GAGGAGCGGCAGCTGGAGAGCAGCCCTTGATAAACAGCTGAGAAAGAA  
GATGAAGCTCAAACCGTAATGAGGATGAATGGGAACATATGCCCGCCGGC  
TAATGACCCTGGAGGCTGTGGAGGTGGTGTGTGAGTTGGTGCCCTCAGAG  
GAGAGAAGGGAGGCCCCGAGGGAACCTATGAGGCTCTACCTCCAGATGAA  
GCCTGTGTGGCGCACACCCTGCCCTGCCAAGGAGTGCCCTGACCAGCTGT  
GCCGCTACAGCTTTAACTCTCAGCGCTTTGCGAGAGCTCCTCTCCTCTACC  
TTCAAGTACAGGTACAATGGAAGATAACCAATTACCTGCACAAGACCCT  
GGCCCATGTTTCCGAAATCATTGAGAGAGATGGATCCATAGGAGCCTGGG  
CCAGCGAGGGGAAATGAGTCGGCAAATAAANNNNNNNNNNNNNNNNNNNNNNNTGGAT  
GGAAAGCCCACAGCCT  
TTCTCCTGCTCAATTGAAGATCCTACAAAACAGACAAAGTTCAAGGGCAT  
CAAGACGTACATTTTCGTACCGGGTCACGCCGAGCCACACAGGACATCCTG  
TCTACAGGGCGTACAAGCACTTTGACTGGCTGTACAACCGCTTACTGCAC  
AAGTTCAGTGTGATCTCCGTGCCTCACCTGCCTGAGAAGCAGGCCACGGG  
GCGATTCGAGGAAGACTTCATTGAGAAGCGCAAGAGGGCGACTGATACTGT  
GGATGAACCACATGACCAGTCACCCAGTCCCTCTCCCAGTATGAAGGCTTT  
GAGCACTTTCGTGATGTGCGCTGATGACAAGCAATGGAATTGGGCAAGAG  
GCGCGCAGAGAAGGATGAGATGGTGGGGGCGCATTTTCATGCTGACCCTCC  
AGATTCAGGAGTGAGCACCAGGACCTCCAGGATGTAGAGGAGCGGATCGAC  
TCCTTCAAGTCCCTTGCTAAGAAAATGGATGACAGTGTGATGCAGCTCAC  
ACATGTTGCCTCAGAGCTGGTGCCTAAGCATCTGGGTGGGTTCAGGAAGG  
AGTTCAGCGGCTGGGAAATGCCTTCCAGTCTATCAGCCAGGCCCTTCATG  
CTAGACCCTCCCTACAGCTCAGAGACCCTAGACAACGCCATCTCCCATNNNNNNNNNNNNNNNNNNAT  
TGACCTCTCTGGGTTCATCATCGGAGTCGGCGTGGTTGGGAACTGCTG  
ATCTCCATCTTGCTGGTCAAAGACAAGAGTCTGCACCGAGCGCCCTACTA  
TTTTCTGCTGGACCTGTGCGCCTCTGACATCCTTCGATCCGCCATCTGCT  
TCCCCTTCGTCTTACCCTCGGTCAAGAATGGATCTGCCTGGACGTACGGC  
ACGCTGACCTGCAAAGTGATTGCCTTCCTGGGTGTGCTCTCCTGTTCCA  
CACAGCGTTTTATGCTGTTCTGTGTCAGTGTACGCGCTATCTGGCCATCG  
CTCATCACCGTTTTCTACACTAAGAGGCTGACCTTCTGGACCTGCCTGGCT  
GTCATCTGCATGGTGTGGACGTTATCAGTGGCGATGGCGTTCCCGCCTGT  
GCTAGACGTAGGGACGTACTTTTTATCCGGGAGGAGGATCAGTGCACGT  
TCCAGCACCGCTCCTTCAGGGCGAATGATTGCTGGGCTTCATGCTCCTG

TTGGCGCTCATCCTCCTGGCCACACAGCTGGTTTACCTCAAGCTCATCTT  
TTTTGTCCATGACCGTCGAAAGATGAAGCCCGTCCAGTTCGTGCCTGCTG  
TTAGCCAGAACTGGACCTTCCACGGGCCAGGTGCCAGCGGGCAGGCGGCC  
GCCAACTGGCTGGCCGATTTCGGTCGAGGCCCCACTCCGCCTACTTTGCT  
GGGCATCAGACAGAACAGCAATGCAGCGGGCCGAGGCGTCTACTGGTAT  
TGGATGAATTCAAACGGAGAAGAGGATTAGTAGGATGTTCTACATCATG  
ACATTTTTCTTCTGGCACTGTGGGGGCCCTATCTGGTCGCCTGCTACTG  
GCGAGTGTTCWAGGGGCCCTGTGGTCCCTGGGGGCTACCTGACAGCAG  
CTGTGTGGATGAGCTTTGCCAGGCTGGGGTCAATCCTTTCATCTGCATNNNNNNNNNNNNNNNNNNNN  
NNNNNNNNNNNNNNNNNNNT

GGGGACTGGTCTGGCACGGAGC---GCAGCGTCCCACTCGGCAACAGCT  
TGCTATCCCCGAGCAAACCGAGGAGACCACTGTTGCCACCCCCCGCAG  
CGTTGGTTTGTACCC---CTGCCAACACCGACTGGACTTTGTGCCTC  
GGCATAACGACGCCGT-----GATTTCCGCCGGTAACGCGGCCACCT  
TGCTGTCTACGCTGCGGCCGGAGTGAAGGCTC-----TTCCCTGCCG  
ACTGCAGGCTGCTCCAACCGGCCTCTTGGCTACTACGCAGACCCGTCAG-  
--GCTGG---GGAGGACGCACGCCCGCCGAGTACTGTGGTGTGAATAGCA  
AATCCAGCTCGGTCTTTTCTGCTGGCCTTCTAACTCTATCGGAGGCAGA  
GC-----CGAGGA---AGGG--  
-GACTC---CATCCCGACAGAGAGGTCATCG---AT---TGGCGGCTCCG  
AGGAG---ACCAAACCTAAAGACATAAC---GTCAGA---GTCGAGCTGG  
ATAGAG---ACGCCGTCTCCATTAAGTCCATAGATTTCGAGCGATTCTGG  
AATCTTTG---AACAGGCCAAACGGAGAAGGATCTCACCTTCTGCCACGC  
CA-----GTTTCAGAGACAGTGTCCCGCTGAAGTCTGAGCATCAC  
TCAACAGGCCAAGTCACAGAGAGAGAAGTGGCGTTGGGGATAAATCCGTT  
CGCAGATGGGATGGGCGCCTTCAAATAAACCACAGCTCCACGATATTG  
GCTCCGG---ACAAACGGCGTTTTCTCGCAGGCG---CCTGGGTAC---  
GCAGCAGCAGCCCTGGGA---CACCACCA-----CCATCCGACCCACGT  
TGGCTCT---TACTCTACGGCGGCTTTCAACTCCACCAGGGACTTTCTCT  
TCAGAAATCGGGGATTCGGGGACGCCACCGG-----GGCTCAG  
CACAGTTTGTTCGCCCTC-----CGGGAGTTT---C-----GCAGG  
GCCACATGGACACTCAGATGCAGCGGGCACCTGCTCTTCCCGGGGCTCC  
ACGAG---CAAGCGGCGAGCCACGCGTCTACCAATGTGGTTAACAGCCAG  
ATGCGGCTGGGCTTCTCGGGGACATGTACGGACGGCCGACCAGTACGG  
CCACGTTACAAGTCCGCGTT---CCGACCCCTACGCCTCGACCCAGCTGC  
ACGGCTACGGCCCCATGAACATGAATATGGCCGCG---CACCACGGAGCA  
GGGGCTTCTTTTGATACATGAGGCAGCCGATCAAGCAAGAGCTCATCTG  
CAAGTGGATCGAGCCGGAGCAGCTGACGAATCCCAAAAAGTCATGCAACA  
AACTTTCAGCACGATGCACGAGCTCGTGACCCATCTGACGGTGGAGCAT  
GTGGGGGGCCAGAGCAGACCAACCAGTCTGCTTCTGGGAGGAATGTT  
CAGAGAAGGAAAGCCGTTCAAAGCCAAATACAACTTGTGAATCATATCA  
GAGTACACACCGGAGAAAACCCCTTCCCGTGTCCGNNNNNNNNNNNNNNNNNN

>Lampris guttatus

AGTCTTCTAATCCGAGCTGAGCTCAGCCAACCAGGAGCCCTCCTGGGAGA  
CGACCAAATCTATAACGTAATCGTCACCGCCCATGCCTTCGTAATAATTT  
TCTTTATAGTCATGCCTATCATAATTGGAGGCTTTGGGAACCTGGCTGATT  
CCCTTAATAATTGGCGCCCTGATATGGCTTTTCCCCGAATGAACAACAT  
AAGCTTCTGGCTTCTTCCCCCTCTTTCCTACTCCTCCTAGCCTCCTCCG  
GAGTGGAGGCCGGGGTAGGAACAGGCTGAACCGTATACCCCTCTAGCA  
GGGAACCTAGCCACGCAGGAGCCTCGGTTGACCTAGCCATTTTCTCCCT  
CCACCTAGCAGGGGTTTCTCTATTTCTAGGAGCAATTAACCTTTATTACGA  
CAATTATTAATATGAAACCCCGGCCATCTCTCAATACCAGACCCCTCTC  
TTCGTATGGGCCACCCGTGATTACGGCTGTTCTCCTTCTCCTCCTCCCTCC

TGTCTTAGCCGCCGGAATTACGATACTCCTAACAGATCGAAACCTTAATA  
CTACATTTCTTTGACCCCTCTGGAGGAGGAGACCCCATTTCTATATCAACAT  
TTGTTC-----

-----GGATGAATACATTGTTGTATTTCAGC  
CGTTCAACAACCTAGACTGATTCTGAATGAACCTGAGCTGATCATGGCACT  
GGCCCAGGAGTTTCAGATGAGAGTGATTACAGTGTCCCTGGAGGAACAAT  
CTTTCCCAAGTATTGTTTCAGGTTATCAGCGGGGCTCCATGTTGGTGAGT  
ATGCATGGAGCACAGCTTGTACCTCACTCTTCCCTCCTCGGGGAGCTGC  
CGTGGTGGAGCTGTTCCCCTACACTGTGAACCCAGAACAGTACACGCCTT  
ATAAAACCCTCGCCTCCTTGCCAGGCATGGACCTTCAGTATGTTTCTTGG  
AGGAACACAAAGGAAGAGAACAACACTGTCACTCACCCAGACAGACCCTGGGA  
CCAAGGGGGAATTGCCCACTTGAAAAGGATGAGCGAGAGCGTATACTGG  
CCAGCAAGGAGGTCCCAGACATCTATGCTGCCGCAACCCGGAATGGCTC  
TTCCGAATCTACCAGGATACATTAGTGGATATCCCGTCATTTCTGGAGGT  
CCTTAA---AGAGGGCATAAAG---GTCAGACCCAGCTTGAAGAA---GT  
CCAAACCTACCAGTGCAGTTACCCGGGCGGGTCAGAGAACCCAGTGC  
CAGACTTCAGTCCAAGCCACCAATGAGGCAAAACTTACCGTCTCTTGGCA  
GATCCCATGGAATCTGAAATACCTGAAGGTGAGAGAAGTGAAGTATGAGG  
TTTGGATCCAG-----

-----CCCAACAAGGAGGCCTTCAAGTGTGAGGAGTGTGGCAAGCACTA  
CAACACCAAGCTGGGATACAAGCGCCATGTGGCCATGCACTCTGCCACGG  
CAGGGGACCTCACCTGCAAAGTGTGTATGCAGAGCTATGAGAGCACGCCA

GTGCTCCTGGAACACCTCAAGAGCCACTCGGGCAAGTCCTCGGGTGGTAC  
CAAGGAGAAGAAGCACCCATGTGATCACTGCGACCGCCGCTTCTACTC  
GGAAGGATGTGAGGCGGCACATGGTGGTCCACACGGGCCGAAAGGACTTC  
CTGTGCCAGTACTGTGCCAGCGCTTTGGCAGGAAGGACCATCTGACGCG  
CCACGTAAAGAAGAGTCACTCACAGGAGCTGCTGAAGATCAAGACAGAGC  
CTCCGGACATGTTAGGTCTCCTAGGCTCCGGCTCGCCTCCTTGCTCTGTC  
AAGGAGGAGCTTAGCCCCATGATGTGCAGCATGGGTCCCAACAAAGATCC  
CATGATGGGAAAACCTTCCCCAGTGGTACCCCTTCCCCATGGGCATGT  
ATAACCACCACCAC-----CTCCAGGCCATGTCCAATTCGGGGGTGGGC  
CATCCC-----CACCCCTCCCTGATGCCCAACACCCTGTCTGCAGCAAT  
GGGCATGGGCTGTACATGGAATATCTTATCTACGCCTCCTTCTCCTTCA  
TGGGATGTTTACAAAATTAGTGATGGATCAAACATCGTGAATTTGCTGGCA  
AGTAACTCCCCAAGTGTTCGTATGCACCTACTCAGCAGAAGTACTTCAG  
TAACTACAGTCCTGTGATTGGGTTCTACATTTACGAACCCATAGAGTACT  
GGAACTCCACAGTGCAGGAGCACCTGAAGACACTGAGCCATGGCTTCAAC  
AAGATCTCCTGGATGGACAACCTTCTTCCACTACCTGAGGGTGGTAAATGT  
GAGTGCATCGACCAAAAACCGACTTCATCAACATCCTCAAGAGCTCCTTCC  
TCCGCAGCCCCGAGTACCAGCACTTCACTGAGGACATAATCTTCTCCAAG  
A---ACAGGGAGAGTG-----ATGAATATGACATCATCGCCTCACGCAT  
GTACCTTGTGGCGCGGACCACAGAGAAGAAGCGTGAGGAGGTAGTGGAGC  
TTCTGGAAAAGCTGCGTCCACTGATGCTGATTAACAGCATCAAGTTCATT  
GCCTTCAACCCACCTTTTGTGTTTCATGGACCGGTACAGCTCCTCGGTTAT  
TTCACCCATCCTAACCTCAGGCTTCAGTGTGCTTACCATCCTCATCCTCA  
CTTTCTTCCCTGGTCATCAATCCTCTAGGAAACTTCTGGCTCATCCTCACA  
GTCACCTTCTGTGGAGCTGGGCGTGTGGGTTTGATGGGCTATCACCCATT  
TGAGTGGCAGCCTGCCCTCAAGAATGTGTCTGCATCGTGCCAAGTGGGCA  
TAATCAACGGGCTATCTGGGTGGGTTGCTTCTGTTGATGACTCTCCGGCT  
GATACAATCACTCGCCGGTTTCGTTATGACGTGGCCCTGGTATCGGCCCT  
CAAAGATCTGGAAGAGGACATTATTGAGGGACTGAGCAAGTGTGGGCTTG  
AAGACAGTGCCTTGCACCTCAGGCTTCAGTGTATGATCAAGGAGTCTTGC  
GATGGCATGGGTGATGTCAGCGAGAAGCACGGTGGAGGCCCTCCTGTCCC  
AGAAAAAGCTGTGCGCTTTTCTTTTACCATTATGTCCATCTCTATATTGG  
CTGATGGAGAGCAG-----GAAGAG  
GTAACTATCTTCAGGGAGCCAAAGCCAAATTCTGAACTGTCCTGTAAACC  
TCTTTGCCTGATGTTTGTAGACGAGTCTGACCACGAAACCCCTCACGGCTG  
TCCTAGGGCCTGTGATTGCGGAACGAAACGCCATGAAGCAGAGCCAACTC  
ATCCTATCTATGGGCGGGCTACCTCATTCTTTCCGCTTCCACTTTAGAGG  
CACAGGCTATGATGAGAAGATGGTGCCTGAGATGGAGGGCCTCGAGGCCT  
CAGGTTCACCTTATATCTGCACCCCTGTGCGATTCCACTAGGGCGGAGGCC  
TCTCACAAACATGGTACTCCATTCTATCACACGCAGCCACAGTGAGAACCT  
GGAGCGCTATGAGATATGGAGGACAAATCCCTTCTCTGAGTCTGCTGAGG  
AGCTGCGAGACCGGGTCAAAGGAGTCTCTGCCAAGCCCTTTATGGAAACC  
CAGCCTACTCTAGATGCATTACACTGTGACATCAGCAATGCCACAGAGTT  
CTACAAAATCTTCCAGGATGAGATTGGAGAAGTGTTCCAAAGGCC---CA  
AC---CCTACCCGGGAGGAAAGGCGAGGATGGAGGGCAGCCTTGGATAAG  
CAGCTTAGGAGGAAGATGAAGCTTAAGCCTGTGATGAGGATGAATGGAAA  
CTATGCCAGAAGGCTGATGACCAAGGAGGCTGTGGACGTGGTATGTGATT  
TAGTGGCCACAGAGGAGAGGAGGGAGGCCCTGAGGGAGCTTATGGAGCTA  
TACCTGCAGATGAAAACCTGTATGGCGTGCTACCTGCCCCACCAATGAATG  
CCCTGACCAGCTATGCCAGTACAGCTTCAACTCTCAGCGCTTTGCTGATC  
TCCTTTCCACTGCCTTTAAATATAGATATAATGGAAAAGATTACCAATTAC  
CTGCACAAGACACTGGCCCATGTCCCAGAAATTATAGAGAGAGATGGCTC  
CATCGGAGCCTGGGCCAGTGAAGGGAATGAGTCAAGCAACAAATCGTACA







CTTGCACTATGTCTCCTGGAGGAATACCATGGAGGAGAACACAGTCACCC  
ACCCAGACAGACCCTGGGAACAAGGAGGCATAGTTCATTTGGAGAAGGAG  
GAACAGGAGCGAATACTGGCCAGCACAGATGTCCCAGGCACCTGTGCTG  
CCGCAATCCAGAGTGGCTCTTCAGGATCTACCAGGACACTTTGGTAGACA  
TCCCTTCATTCTGGAAGTCATCAA---AGAGGGCTTGAAG---ACCAAG  
CCTAGTTTGAAGAA---GGCCAAGGCGGCCAGCACAGTTCACCCAGGCCG  
GGTCAGAGAAGCCAGTGTGACACCTCAGTGCAAACCAGCAGTGAGGCTA  
AACTCACAGTTTCTGAGCAGATCCCATGGAATCTGAAGTATCTGAAGGTG  
AGAGAAGTGAAGTACGAGGTG-----AAGAAAGACACCAGCAAGGG  
GACATTGGAAGATCAAATCATCCAGGCGAACCAGCCCTGGAGGCCCTCG  
GTAATGCCAAAACAGCGAGAAATGACAACCTCATCCCGTTTTGGAAAATTC  
ATCCGAATTCACCTTTGGAAACAGCGGCAAGTTATCATCCGCTGACATTGA  
GACATATTTGCTGGAGAAGTCCCGTGTACCTTTTCAGCTCAAGGCTGAGA  
GGAACTACCACATCTTCTACCAGATCTTGTCCAATCAGAAGCCAGAGCTG  
TTGGACATGCTGCTGATCACAACAACCCGTATGACTACTCCTACATCTC  
TCAAGGGGAGGTAACAGTTGCATCAATCAATGACGCAGAAGAGCTGATGG  
CCACTGACAGTGCCTTTGACGTGCTCGGCTTCACTCAAGAGGAAAAGATG  
GGTGTTTATAAGCTGATTGGTGCCATCATGCACTATGGCAACATGAAGTT  
TAAGCAGAAGCAACGTGAGGAGCAGGCTGAACCTGACACGACAGAGGCTG  
CTGATAAATCAGCTTACCTGATGGCCCTGAACTCTGCAGACCTCATTA  
GGGTTGTGCCACCCCAGAGTTAAGGTAGGGAATGAGTATGTTACCAAAGG  
CCAAAGTGTGGACCAAGTCTACTATCCCAACAAGGAGGCTTTCAAGTGTG  
AGGAGTGTGGCAAGCAGTACAACACCAAGCTGGGATATAAGCGACATGTG  
GCCATGCACTCTGCCACAGCGGGGGATCTCACCTGCAAAGTGTGCATGCA  
GAGCTACGAGAGCACGCCGTGCTCCTGGAACACCTCAAGAGCCACTCTG  
GGAAGTCCCTCAGGTGGCACCAAGGAGAAAAAGCACCCGTGTGACCCTGT  
GACCGTCTGTTTCTACACGCGGAAGGATGTGAGACGGCACATGGTGGTCCA  
CACGGGCAGAAAGGACTTTCTGTGCCAGTACTGTGCCAGCGCTTTGGCA  
GGAAGGACCACCTGACGCGTACGTAAGAAGAGCCACTCTCAGGAGCTG  
CTGAAGATCAAGACGGAGCCCCCGGATATGTTAGGTCTGTTAGCTTCAGG  
GTCACCACCTTGCTCTGTGAAGGAGGAGCTTAGCCCCATGATGTGCGGCA  
TGGGTCCAAATAAAGACCCCATGATGGGAAAACCCCTCCCAAGTGGGGCC  
CCTTTCCGATGAGCATGTACAACCCCCACCAT-----CTCCAGGCCAT  
GTCCAATTCTGGGGTGGGCCACCCC-----CACCCCTCCTTGATGCCTA  
GTCCCTGTCTGCAGCTATGGGTATGGGCTGTCAATGGAATATCTCATC  
TATGCCTCTTTCTCATTCATGGGATGTTTACAAATCAGTGATGGATCAA  
CATTGTGAACCTGCTGGCCAGTAACTCTCCGAGTGTCTCCTACGCTCTGA  
CCCAGCAGAAATACTTCAGCAACTACAGCCCCGTGATTGGGTTTTACATT  
TACGAGCCCATTGAGTACTGGAATTCACGGTGCAGGAGCATCTGAAGAC  
TCTGGGTACGGATTCAACAAAATCTCCTGGATGGACAACCTTTTCCACT  
ACCTGCGTGTGGTGAATGTGAGCGGTCACCAAGGGCGATTTTATCTCC  
ATCCTCAAGGGTTCTTCTTGGCAGCCCGGAGTACCAGCACTTCACTGA  
GGACATCATCTTCTCTAAGA---ACCGTGAGACTG-----ATGAGTATG  
ACATTATTGCCTCACGAATGTATTTGGTGGCAAGGACCACCGAGAAGAAG  
CGCGAGGAGGTGGTGGAGCTTTTGGAGAAGCTACGTCCGTTGATGCTGAT  
CAACAGCATCAAATTCATTGCCTTCAACCCCACTTTTGTGTTTCATGGACC  
GCTACAGCTCCTCTGTAATCTCGCCATCCTGACCTCAGGCTTTAGCGTT  
CTCACTATCCTCATCCTCACTTTCTCCTGGTCATCAATCCCTTAGTGTA  
CTTCTGGCTCATCCTGACAGTTACATCCTGGGAGCTGGNNNNNNNNNNNNNNNNNNNN-----  
-----  
-----  
-----  
-----











>Lates niloticus

AGCCTACTCATCCGAGCTGAACTTAGCCAACCTGGCGCACTCCTAGGAGA  
CGACCAGATCTATAACGTAATCGTTACCGCCCACGCTTTCGTAATAATTT  
TCTTTATAGTAATACCAATTATGATCGGAGGCTTTGGAAACTGACTTATC  
CCACTAATAATTGGGGCCCCAGACATAGCATTCCCTCGAATAAAATAACAT  
GAGTTTCTGACTCCTTCCACCATCTTTCCTGCTCCTCCTAGCTTCTTCTG  
GAGTAGAAGCCGGAGCTGGAACCGGTTGAACTGTGTATCCACCCCTCGCT  
GGGAACCTTGCCCATGCTGGAGCATCCGTCGACCTGACCATCTTCTCACT  
TCACTTAGCAGGAATTTTCCTCAATTCTCGGGGCCATCAACTTTATTACTA  
CCATCTTCAATATGAAGCCGGCTGCCGTATCTATGTACCAAATTCCTCTA  
TTCGTCTGAGCAGTGTTAATCACAGCTGTCCTACTCCTTCTTTCCCTCCC  
AGTCTTAGCTGCGGGTATCACAATACTTCTCACAGACCGAAATCTAAATA  
CAGCATTTCTTTGACCCCGCCGGAGGAGAGACCCCATTTCTCTATCAACAC  
CTA

-----GGACGATTACATTGTTGTGTTTCAGT  
CGTTCAACAACGAGGCTTATACTTAATGAAGCAGAGCTAATCATGGCATT  
GGCCAGGAGTTCCACATGAGAGTGGTCACAGTATCCCTGGAGGAACAGT  
CTTTTCCCAGTATCATCCAGGTGATCAGCGGTGCTTCCATATTAGTCAGC  
ATGCATGGAGCTCAGCTTATCACCTCACTCTTCCCTCCCCAGAGGAGCTGT  
TGTGGTGGAACTGTTTCCCTTTGCTGTGAATCCGGAGCAGTACACTCCTT  
ATAAAAACCCTTGCCCTCCCTCCCAGGCATGGACCTTCACTATATCTCCTGG  
AGAAATACTAAGGAGGAAAACACCATCACCACCCAGACAGACCCCTGGGA  
ACAAGGAGGTATTGCTCACTTGGAGAAGGAGGAGCGAGAGAGAATACTGG  
CCAGTAAGGAGGTCCCCAGGCACCTGTGCTGCCGCAACCCAGAGTGGCTC  
TTCCGGATCTATCAGGACACCTTAGTTGACATCCCCTCCTTCCCTAGAAAT



CCTCAA---AGAGGGCATGAAG---ACCAAGCCCAGCTTGAAGAA---GT  
CAAAGCCTGCCAGCACAGTTCACCCAGGCCGAGTCAGAGAACCCAGTGT  
CAGACCTCAGTACAAACCACTAATGAGGCAAAACTCACAGTCTCCTGGCA  
GATCCCATGGAATCTGAAATACTTGAAGGTAAGAGAAGTCAAATACGAAG  
TGTGGATCCAGAAAAAGATGCCAGCAAGGGGACACTGGAGGATCAAATC  
ATCCAGGCAAACCCTGCACTGGAGGCCCTTCGGCAACGCCAAAACGTTGAG  
AAACGACAATTCGTCACGTTTTGGAAAATTTATTCGCATTCACTTTGGTA  
CGAGTGGCAAACCTGTCATCTGCTGACATCGAGACGTACCTGCTGGAGAAG  
TCACGCGTCACTTTTCAGCTCAAGGCTGAGAGGAACTACCACATCTTCTA  
CCAGATCCTGTCCAATCAGAAGCCAGAGCTGCTGGACATGCTGCTGATCA  
CCAACAACCCGTACGACTACTCCTACATCTCCCAAGGAGAGGTAACAGTT  
GCTTCCATCAATGACTCGGAGGAGCTGATGGCCACTGACAGCGCCTTCGA  
TGTGCTTGGCTTCACTCCAGAAGAGAAGATGGCGGTCTATAAACTGACCG  
GTGCCATCATGCACTACGGCAACATGAAGTTCAAAACAGAAGCAGCGTGAG  
GAGCAGGCTGAACCTGACGGGACGGAGGCTGCTGATAAATCAGCTTACCT  
AATGGGGCTGAACTCCGCTGACCTCATCAAAGGCCTTTGCCACCCCAGAG  
TCAAAGTGGGAAATGAATACGTCACCAAAGGCCAAAGTGTGGACCAAGTC  
TACTANNNNNNNNNNNNNNNNNNNNNNNNNNNNNNNNNNNNGTAAGCACTACAACACCAAGCTGGGATACA  
AGCGTCATGTGGCCA  
TGC ACTCTGCCACAGCAGGGGATCTCACCTGTAAAAGTGTGCATGCAGAGC  
TACGAGAGTACACCTGTTCTTCTGGAGCACCTCAAAGCCACTCTGGGAA  
GTCTTCCGGTGGTGCCAAGGAGAAGAAACACCCGTGTGACC ACTGTGACC  
GTCGTTTCTACACACGGAAGGATGTCAGACGGCACATGGTGGTCCACACA  
GGCCGAAAGGACTTCTGTGCCAGTACTGTGCCAGCGCTTCGGCAGGAA  
GGACCACCTGACACGCCACGTGAAGAAGAGCCACTCGCAGGAGCTGCTGA  
AGATCAAGACGGAGCCTCCGGATATGTTAGGCCCTTTAGCTTCTGGGTCA  
CCACCTTGCTCTGTGAAGGAAGAGCTTAGCCCCATGATGTGCGGCATGGG  
TCCCAACAAGACCCCATGATGGGCAAACGTTCCCCAGTGGGGCCCCTT  
TTCCAATGGGCATGTACAACCCCCACCAT-----CTTCAGGCAATGTCT  
AATACTGGGGTGGGTACCCA-----CACCCATCCCTAATGCCAGTTC  
CTTATCTGCAGCTATGGGCATGGGCTGCCANNNNNNNNNNNNNNNNNNNNNNNNNNNNNNNNNNNNNNNNNN  
NNNNNNNNNNNNNNNNNNNNNNNNNNNNNNNNNNNNNNNNNNNNNNNNNNNNNNNNNNNNNNNNNNNNNNNN  
NNNNNNNNNNNNNNNNNNNNNNNNNNNNNNNNNNNNNNNNNNNNNNNNNNNNNNNNNNNNNNNNNNNNNNNN  
ACTCTCCAAGTGTTCATATGCTCTGACCCAGCAGAAATATTTTCAGTAA  
TACAGTCTGTGATCGGGTTTTACATTTATGAGCCATTGAATACTGGAA  
CTCTACAGTTCAGGAGCACCTGAAGACCCTGAGTCATGGCTTCAACAAGA  
TCTCCTGGATGGACAACCTTCTTCCACTATCTGCGAGTGGTGAATGTGAGT  
GCATCAACCAAGAGTGACTTCATCACCATCCTTAAAGGCTCCTTCTGCG  
CAGCCAGAGTACCAGCACTTCACTGAGGACATCATTTTCTCCAAGA---  
ACAGTGATACTG-----ACGAGTATGATATTATCGCCTCACGGATGTAC  
TTGGTGGCCCCGACGACGGAGAAGAAGCGAGAGGAGGTGGTGGAGCTTCT  
GGAAAAGCTTCGTCCATTGATGCTAATCAACAGCATTAAGTTCATTGCCT  
TCAATCCCACATTTGTGTTTATGGACCGCTACAGCTCCTCTGTCTCTCG  
CCCATCCTGACCTCAGGCTTCAGTGTACTCACTATCCTCATCCTCACTTT  
CTTCTGGTCATCAACCCATTGGAAAACCTCTGNNNNNNNNNNNNNNNNNNNNNNNNNNNNNNNNNNNNNNNN  
NNNNNNNNNNNNNGGTTTTTACCAGTTTGA  
GTGGCAGCCAGCTCTCAAGAATGTTTCCACGTCTTGCAACGTTGGCATT  
TTAATGGGCTCTCTGGATGGGCTGCCTCGCTGGATGACTCCCCAGCCGAC  
ACCATCACTCGGCGGTTTTGCTATGATGTGGCACTGGTGTGAGCATTA  
AGATCTGGAGGAGGACATCATGGAGGGGCTGAGAGAGAGTGGGATGGAAG  
ACAGTGTGACCTCAGGCTTTAGTGTGATGATCAAGGAATGTTGTGAC  
GGCATGGGTGATGTGAGTAAAAGCACGGTGGAGGACCAGCCGTTCTG  
GAAGGCTGTACGCTTCTCTTTCACCGTTATGTCTGTCTGTCTGTCTAGCAG  
ACGATGACAGG-----CAGGAGGTT





TTCTCCAAGTCCCAAAGATATGGTGGTTCAGCTTTTGTACATGAGGA  
GTTAGAGACAGAAGATGAGAGACTGGTTTACGAAGCTGCTCTCAACTGGA  
TCAACTACGACCTGGAAAAGAGGCAC TGCCACCTTCCAGAGCTCCTGAGA  
ACAGTGCCTTTGGCCCTGCTGCCTGCCATCTTTCTCATGGAGAATGTGTC  
CACAGAAGAGCTCATCAACACCCAGGCCAAGAGCAAGGAGCTGGTAGATG  
AAGCCATCCGCTGCAAGCTGAAGATCCTGCAGAATGACGGCGTGGTCAAC  
AGCCCGTGTGCCAGACCGAGAAAACTAGCCATGCCCTCTTTCTTCTGGG  
AGGTCAGACTTTCATGTGCGACAAGTTGTACCTGGTGGACCAGAAAGCCA  
AAGAGATCATTCCCAAGGCTGATATTCCCAGCCCTAGGAAGGAGTTCAGC  
GCCTGCGCAATTGGTTGCAAGGTATACATTACTGGTGGGA--GAGGGTC-  
TGAGAATGGCGTGTCCAAAGATGTGTGGGTCTATGACACCGTCCATGAAG  
AATGGTCAAAGGCGGCACCCATGCTCATTGCTCGGTTTGGCCATGGATCC  
GCAGAGCTGAAACACTGCCTGTACGTCGTGAGAGGTCACACAGCTGCAAC  
CGGTTGCCTTCCGGCATCTCCATCCGGAAGAGTACATTGTTGTGTTTCACT  
CGCTCAACAACGAGACTGATATTGAATGAAGCAGAGCTAATCATGGCACT  
GGCCAGGAATTCCAGATGAGAGTGGTACAGTATCCCTGGAGGACCAGT  
CTTTCCCCAGTATTGTCCAGGTGATCAGTGGTGTACTATGCTGGTCACT  
ATGCACGGAGCTCAACTTATCACCTCGCTCTTCCCTTCCAGAGGAGCTGC  
TGTGGTGGAGCTGTTCCCTTTGCTGTGAACCCAGAGCAGTACACCCCGT  
ACAAAACCTTGCCTCCCTACCAGGTATGGACCTTCATTATGTCTCCTGG  
AGGAATACCAAGGAGGAGAACAATAATACCATCCAGACAGACCCCTGGGA  
GCAAGGGGCATTGTGCACCTGGAGAAGGAGGAGCAGGAGAGAATCGTGA  
GGAGCAAAGACGTCCCCAGGCATCTGTGCTGCCGCAACCCAGAGTGGCTC  
TTTCGGATCTATCAGGACACTTTGGTGGACATCCCTTCCCTTCCCTGGAGGT  
CCTGAA---GGAGGGCATGAAA---ACAAAGCCCATCTTAAAGAA---AT  
CAAAGCCAGTACCACAGTCCACCCAGGCCGGGTAGAGAACCCAGTGT  
CAGACCTCTGTACAAGCTGCTAATGAGGCCAAACTCACAGTCTCCTGGCA  
GATCCCATGGAATCTGAAGTACCTGAAGGTGAGGAGGTGAAGTATGAGG  
TGTGGATCCAGAAAAAGACACCAGCAAAGGGACCTTGGAGGACCAGATC  
ATCCAGGCCAATCCTGCTCTGGAGGCCTTTGGCAACGCCAAGACACTGAG  
AAATGACAACCTCATCACGTTTTGGAAAATTCATCCGATTCACTTTGGTA  
CCAGTGGCAAACCTTTCATCTGCTGACATTGAGACGTACCTGCTGGAGAAG  
TCACGAGTCACCTTTCAGCTCAAGGCTGAGAGGAACTACCACATCTTCTA  
CCAGATCCTGTCCAATCAGAAGCCAGAGCTGCTGGACATGCTGCTGATCA  
CCAACAACCCCTACGACTACTCCTACATCTCCAAGGAGAAGTAACGGTC  
GCCTCCATTAACGACTCGGAGGAGCTGATGGCCACAGACAGTGCCTTCGA  
TGTGCTCGGCTTCACTGCAGAGGAGAAGATGGGCGTCTACAAGCTGACGG  
GTGCCATCATGCACTATGGCAACATGAAGTTCAAGCAGAAGCAGCGTGAG  
GAGCAGGCTGAGCCAGACGGCACTGAGGCTGCTGATAAATCCGCGTACCT  
AATGGGGCTGAACTCTGCCGACCTCATCAAAGGGCTGTGCCACCCCGAG  
TCAAGGTAGGAAATGAATACGTACCAAAGGTGAGAGTGTGGACCAAGTC  
TACTACCCCAACAAGGAGGCCTTCAAGTGCAGGAGTGTGGCAAGCACTA  
CAACACCAAGCTGGGATACAAGCGTCATGTGGCCATGCACTCTGCCACGG  
CCGGCGACCTCACCTGCAAGGTGTGCATGCAGACCTACGAGAGCACGCCC  
GTGCTCCTGGAGCACCTCAAGAGCCACTCCGGGAAGTCTCCTCGGGCGGCAC  
CAAGGAGAAGAAACACCCGTGCGACCACTGCGACCGTTCGCTTCTACACGC  
GGAAGGATGTGAGACGGCACATGGTGGTCCACACGGGCGCAAAGGACTTC  
CTGTGCCAGTACTGTGCCAGCGCTTCGGCAGAAAGGACCATCTGACGCG  
GCACGTGAAGAAGAGCCACTCGCAGGAGCTGCTGAAGATCAAGACGGAGC  
CTCCCGACATGCTGGGCCTGCTGGCGTCCGGGTCCGCGCCGTGCTCCGTG  
AAGGAGGAGCTCAGCCCCATGATGTGCGGCATGACTGCCAACAAGACCC  
CATGATGGGCAAACCTTCCCTGGGGGGGCCCCGTTTCAGATGGGCATGT  
ACAATCCCCACCAC-----CTCCAGGCCATGTGCAATTCCGGGGTGGGT

CACCCG-----CACCCGTCCTGATGCCCGGCCCCCTGTCTGCAGCCAT  
GGGCATGGGCTGCCACATGGAANNNNNNNNNNNNNNNNNNNNNNNNNNNNNNATGGGATGTTTACAAATTAGT  
GATGGAT  
CAAACATTGTGAACCTGCTGGCTAGTAACTCTCCGAGTGTTTCATATGCT  
CTGACCCAGCAAAAATACTTTAGTAACTACAGTCTGTGATTGGCTTTTA  
TATTTATGAGCCCATTGAGTACTGGAACCTCCACAGTGCAGGAGCACCTGA  
AGACCTTGAGTACGGCTTCAACAAGATCTCCTGGATGGACAACCTTTTC  
CATTACCTGCGGGTGGTGAATGTGAGTGCATCAACCAAAGCGACTTCAT  
CACCATCCTCAAGGGCTCGTTCTGCGCAGCCCAGAGTACCAGCACTTCA  
CTGAGGACATCATATTTTCTAAGA---ACCGCGAGACAG-----ACGAG  
TACGAAATCATCGCCTCTCGGATGTACCTGGTGGCACGGACGACAGAGAA  
GAAGCGTGAAGAGGTGGTGGAGCTCCTGGAGAAGCTTCGCCCCGTTGATGC  
TGATCAACAGCATCAAATTCATTGCCTTTAATCCCACCTTTGTGTTTATG  
GATCGCTACAGCTCATCCGTCTCGCCCATCCTGACCTCAGGATTCAG  
TGTGCTCACAATCCTCATCCTCACTTTCTTCTGTCATCAACCCCTTGG  
CAAACCTCTGGNNNNNNNNNNNNNNNNNNNNNNNNNNNNNNNNNNNNNNNN  
NNNNNNNNNNCAGCCAGCTCTCAAGAATGTATCTACATCTTGCAATGTT  
GGCATTATTAACGGGCTCTCTGGATGGACCTCCTCAGTGGATGATGCCCC  
AGCTGACACCATAACGCGACGTTTTTCGCTACGATGTGGCTCTTGTGTCAG  
CACTAAAGGACCTGGAGGAGGACATCATGGAAGGGCTGAGGGAGAATGAG  
ATGGAGGACAGTGCTTGCACCTCAGGCTTCACTGTCATGATCAAGGAGTC  
CTGCGATGGCATGGGTGACGTGAGTGAAGCACGGAGGAGGACCAGCTG  
TCCCAGAGAAGGCTGTGCGTTTTCTCTTTCACTATCATGTCTATTTAGTG  
ACGACTGAGG---AGGAG-----AA  
AGAAGTCAGCATCTTACAGAGATGAAGCCAAACTCAGAGCTGTCCTGTA  
AGCCCCCTCAGCCTCACATTTGTGGATGAGTCAGACCATGAGACACTGACA  
GCCATACTGTGGCCTATTGTTGCAGAGCGTAATGCAATGAAAGAGAGCAG  
GCTCATCCTGTCCATTGGTGGACTGCCTCGCTCCTTCCGCTTTCATTTCA  
GAGGCACGGGATATGATGAGAAGATGGTACGTGAGATGGAGGGCCTCGAA  
GCCTCAGGGTCCACTTACGTCTGCACCTTTTGTGACTCAGGTCGAGCGGA  
GGCCTCTGAAAACATGGTGTTCACACCATAACTCGGAATCACGAAGAGA  
ACCTAGAGCGATATGAGATATGGAGAAGCAACCCCTTTTCTGAGTCAGCA  
GATGAGCTTCGAGACAGAGTCAAAGGGGTCTCCGCCAAACCCCTCATGGA  
GACCCATCCCACGATGGATGCATTACACTGCGACATAGGCAATGCCACAG  
AGTTCTACAAAATCTTTCAGGATGAGATCGGGGAGGTGTTTGAAGGCC-  
--CAAC---CCCAGCCGAGAGGAGCGCCGACGCTGGAGGGCAGCCCTGGA  
TAAACAGCTGAGGATGAAGCTGAAGCTCAAACCGGTGATGAGGATGAATG  
GGAACATATGCACGCCGCTAATGACGACAGAGGCTGTGGAAGCAGTGTGT  
GAGCTGGTGCCTCAGAGGCAAGGAGGGAGGCCCTGAGGGAGCTGATGGA  
GCTCTACCTCCAGATGAAGCCCGTGTGGCGTTCCAGCTGCCAGCCAGGG  
AGTGCCCCGACCAGCTGTGCCGTTACAGCTTCAACTCCCAGCGCTTTGCT  
GACCTCCTGTCTTCCACCTTCAAATATAGGTACAAAGGAAAGATACCCAA  
TTACCTGCACAAGACCCCTGGCCATGTGCCTGAAATCATAGAGAGAGATG  
GACCCATAGGAGCTTGGGCCAGTGANNNNNNNNNNNNNNNNNNNNNNNTCGTACACCATCGAGATGGGTCC  
CT  
TGGGTCCCAGGTGGAAAGATAGCCCTCAGCCTTTCTCCTGCTCCATTGAA  
GACCCAACGAAACAGACAAAGTTCAAAGGCATCAAGACGTACATTTTCGTA  
CCGGGTGACGCCGAGCCACACGGGGCACCCAGTCTACAGACGCTACAAAC  
ACTTTGACTGGCTGTACAACCGCTGCTGCACAAGTTCACTGTGATCTCC  
GTGCCTCACCTGCCTGAGAAGCAGGCCACGGGGCGATTCGAGGAAGACTT  
CATCGAGAAGCGCAAGAGGCGACTGATACTGTGGATGAACCACATGACCA  
GCCACCCGGTCTCTCCAGTATGAAGGCTTCGAGCACTTTCTGATGTGC  
GCTGATGACAAGCAGTGGAAACTGGGCAAGAGACGGGCGGAGAAGGACGA





AACCCTGCCCTGGAGGCTTTTGGCAATGCCAAAACATTGCGAAATGACAA  
TTCTTCGCGGTTTTGGAAAATTCATCCGCATTCATTTTGGAAACAAGTGGCA  
AATTGTCTTCTGCTGACATAGAGACTTATCTGCTGGAAAAATCACGTGTC  
ACCTTTCAACTTAAAGCGGAAAGGAAGTATCACATTTTTTTTTCAGATATT  
GTCCAATCAAAGCCAGAGTTGCTGGACATGCTGTTAGTTACCAACAATC  
CATATGATTATTCTTACATCTCCCAAGGAGAGGTAACAGTTCTATCCATC  
AATGATTCTGAAGAACTTATGGCCACTGATAGKGCATTTGATGTGCTTGG  
ATTTTCTTCAGAGGAAAAGAGTGGGGTCTATAAAATGACAGGTGCCATCA  
TGCACATGGCAACATGAGGTTCAAGCAAAGCAGCGTGAGGAGCAAGCA  
GAACCTGATGGCACAGAAGCTGCTGACAAGGCTGCCTACCTAATGGGACT  
GAACTCAGCAGATCTCTTGAAAGGACTTTGTCAACCAAGAGTCAAGGTTG  
GAAATGAGTATGTAACCAAGGGCAAAGTGTAGATCAAGTATACTAC---

-----TACCTGATCTACGCCTCCTTCTCCTTCATGGGCTGCC  
TGCAGATCAGCGACGGCTCCAACATCGTCAACCTGCTGGCCAGTAATTTCG  
CCGAGCGTGTCTACGCGCTCGCACAGCAGAAGTACTTCAGCAACTACAG  
CCCCGTGATCGGCTTTTACATCTACGAGCCATCGAGTACTGGAACCTCCA  
CCGTGCAGGAGCACCTCAGGACGCTGGGTGAGGCTTCAACAAAATCTCC  
TGGATGGACAACCTTCTTCCACTACCTGCGGGCGGTGAACGCCAGCGCCTC  
CACCAAGGCCGACTTCATCGCCACGCTCAAGGTCCTTCTCCTGCGTAGCC  
CGGAGTACCAGCACTTCACGGAGGACATCATCTTCTCCATGA---ACGGC  
G-----AGGAGTACGACATCATCGCGTCCAGGATGTACCTGGT  
GGCGAGGACCACCGAGAAGACGCGGGAGGAGGTGGTGGAGCTCCTGGAGA  
GGCTGAGGCCCTGTCTCATCAACAGCATCAAGTTCATCGTCTTCAAC  
CCCACCTTCGTCTTCATGGACCGATAACAGCTCGTCCGTGGTGTGCGCCAT  
CCTGACGTGCGCCTTCAGCGTGCTCACCATCCTCATCCTCACCTTCTTCC  
TGGTCATCAACCCGCTGGGGAACCTCTGGCTGATACTGACCATCACCTCC  
GTGGAGCTCGGCGTCTGGGCCTGATG-----

-----GC  
CGTGCGCTTCTCCTTCACACTCATGTCTATCTCCGTCCGGGCCGAAGGTC  
AGGAG-----CAGCCAGTCACGGTC  
TTCAGGGAGGCCAAGCCCAACTCAGAACTCTCCTGCAAGCCTATGTGCCT  
GATGTTTCGTGGACGAGTCCGACCACGAGACGCTCACCGCCATCCTGGGGC  
CCGTGGTTGCCGAGCGGGACGCCATGAAGGAGAGCAGACTCATCCTCTCG  
CTGGGTGGCCTCCAGCGCTCTTCCGCTTCTGTTCCGGGGCACGGGCTA  
TGATGAGAAGATGGTGCAGGGAGATGGAGGGGCTGGAGGCCTCGGGCTCCT





















-----  
-----  
-----  
-----  
-----  
-----

NNNNNNNNNNNNNNNNNNNNNNNNNGGTGGCGTTGGGGA  
TCAACCCGTTTCGCGGACGGCATGGGCGCCTTCAAAATAAACACGGCTCC  
CACGACATCGGCTCCGG---GCAGACGGCGTCTCTCGCAGGCG---CC  
CGGCTAC---GCGGCGGCCGCCCTGGGG---CACCACCA-----CCACC  
CGACCCACGTCAGCTCG---TACTCCACGGCAGCCTTCAACTCCACCAGG  
GACTTTCTGTTTCAGAAACAGGGGCTTCGGAGACGCCACCAG-----  
---CGCCCAGCACAGTTTGTTCGCCTCCGC-----GGGAAGTTT---C-  
-----GCGGGGCCACATGGACACTCGGATGCCGCGGGGCACCTGCTCTTC  
CCCCGGCTGCACGAA---CAAGCCGRAGCCACGCGTCTCGAACGTCGT  
CAACAGCCAGATGCGACTGGGCTTTTCGGGGGACATGTACGGACGGGCGG  
ACCAGTACGGCCACGTCACGAGCCCGCGGT---CCGACCACTACGCGTCG  
ACCCAGTTGCACGGCTACGGCCCTATGAACATGAATATGGCCGCG---CA  
CCACGGAGCCGGGGCCTTCTTTTCGGTACATGCGGCAGCCGATCAAGCAAG  
AGCTCATCTGCAAGTGGATCGAGCCGGAGCAACTGTCGAACCCCAAGAAG  
GCGTGCAACAAACTTTCAGCACGATGCACGAGCTCGTCACCCATCTGAC  
GGTGGAGCATGTGGGGGGGCGGAGCAGGCCAACCACATATGCGTCTGGG  
AGGACTGCGCTCGCGAGGGGAAGCCGTTCAAAGCCAAATACAAACTTGTG  
AATCATATCAGAGTACACACTGGAGGAAAACCCCTTCCGTGTCCCTTTNNNNNNNN--  
-----

>Lepomis macrochirus

AGCCTACTCATTTCGAGCAGAGCTCAGCCAACCAGGCGCTCTCCTGGGCGA  
CGACCAAATTTATAACGTAATTGTGACAGCACATGCATTTCGTAATAATTT  
TCTTTATAGTAATAACCAATTATGATTGGTGGCTTTGGCAACTGACTTGTC  
CCATTAATAATTGGAGCCCCGATATAGCATTCCCCGAATAAATAACAT  
AAGCTTTTGACTTCTCCCCCCTCTTTCCTTCTTCTCTCGCCTCCTCCG  
GGGTGAAGCCGGGGCTGGCACAGGATGAACCGTTACCCCCCTCTCGCT  
GGTAACCTAGCCCATGCAGGAGCATCAGTCGACCTTACTATCTTCTCCCT  
GCATCTCGCAGGGGTCTCTTCAATCCTGGGAGCTATTAATTTTATTACCA  
CAATTATTAACATGAAGCCCCCTGCTATTTCCAGTACCAGACCCCTTTA  
TTTGTCTGATCAGTCCTAATTACTGCCGTCTTACTCCTGCTTTCCCTTCC  
AGTCCTTGCTGCAGGCATCACAATACTACTTACAGACCGTAATCTAAACA  
CCACTTCTTTGACCCAGCGGGGGCGGGGACCCAATCCTCTATCAGCAC  
CTG-----  
-----  
-----  
-----  
-----  
-----  
-----  
-----  
-----  
-----





-----CATCACTCAA  
CAGGTGAAGTCACAGAGAGAGAAGTGGCGTTGGGGATAAATCCGTTCGCA  
GATGGGATGGGCGCCTTCAAATAAACACAGCTCCACGATATTGGCTC  
CGG---ACAAACGGCGTTTTCTCCAGGGC---CCCGGCTAC---GCGG  
CAGCCGCTCTGGGA---CACCATCA-----CCACCCGACCCACGTTGGG  
TCT---TACTCCACGGCGGCTTTCAACTCCACCAGGGACTTTCTCTTCCG  
AAATCGGGGCTTTGGGGACGCCACCG---GGCGCAACACA  
GTTTGTTCGCCTC-----CGGAAGTTT---C-----GCAGGGCCA  
CATGGACATTTCGGATGCAGCGGGGCACCTGCTCTTCCCAGGGCTCCACGA  
G---CAAGCTGCGAGCCATGCGTCTTCCAACGTGGTCAACAGCCAGATGC  
GGCTGGGCTTCTCGGGGGACATGTACGGACGCGCCGACCAGTATGGCCAC  
GTTACAAGCCCGCGGT---CCGACCACTACGCTTCGACCCAGCTGCACGG  
CTATGGCCCCATGAACATGAATATGGCCGCA---CACCACGGAGCAGGGG  
CCTTCTTTTCGATACATGAGGCAGCCCATCAAACAAGAGCTCATCTGCAAG  
TGGGTTCGAGCCGGAGCAGTTGACGAATCCCAAAAAGGCGTGCAACAAAAC  
TTTTAGCACGATGCACGAGCTTGTGACCCATCTGACGGTGGAGCATGTGG  
GGGGACCGGAGCAGACCAACCACATCTGCTTCTGGGAGGAATGCGCCAGA  
GAAGGAAAGCCATTCAAAGCCAAATACAACTTGTAATCATATCAGAGT  
ACACACCGGAGAAAAGCCCTTTCCGTGTCCGTTCCCCGGCTGTGGCAA  
>Lestidiops jayakari  
AGTCTTCTTATCCGAGCGGAAGTCAACCCGGGGCCCTTGGGTGA  
CGACCAGATTTACAACGTAATCGTCACAGCTCATGCCTTCGTAATAATTT

TCTTCATGGTCATGCCCATCATAATCGGCGGCTTCGGGAACTGGCTTATC  
CCACTGATAGTCGGAGCCCCTGATATGGCTTTCCCTCGAATAAAACAACAT  
AAGCTTCTGACTGCTCCCTCCGTCTTCCTGCTCCTTCTGTCATCCTCCG  
CCGTAGAGGCGGGCGCAGGGACCGGGTGAACGGTTTATCCCCCCTTGCC  
AGCAATCTGGCGCACGCGGGTGCCTCTGTGACCTGACCATCTTCTCCCT  
TCACCTGGCCGGCATTTTCGTCCATCCTCGGAGCCATCAACTTCATCACGA  
CCATCATTAACATAAAAACCCCTGCCATCACCCAGTATCAAACGCCCTC  
TTTGTGTTGAGCCGTTCTTATTACTGCTGTGCTTCTCCTTCTCTCCCTGCC  
TGCTTTAGCAGCAGGCATTACAATGCTTCTTACAGACCGAAACCTAAACA  
CGACCTTCTTTGACCCCGCTGGGGGCGGCGACCCCATCCTATATCAGCAC  
CTCTTCTGGTTCTTCGGCCACCCGGAAGTCTACATTTCTCATCTTACCCGG  
CTTCGGAATAATCTCCCACATCGTTGCCTACTATTCAGGGAAAAAAGAAC  
CTTTCGGGTATATAGGCATAGTCTGAGCAATAATAGCAATCGGCCTCCTC  
GGGTTTATTGTCTGAGCCACCTCATGTTACGGTCGGGATAGACGTGGA  
CCCACGAGCATATTCCTCGAGAGGAACCTGCACCCATCCAAGTGCCTTGG  
CATGCTGCTACTGTCAGATGCCACCAGTGCACCAAGCTGTCAGAGCTGT  
CCTGGGGTATGTGTCTCAGCAACTTCCCTGCCATCTGCAAGACGGAAGAC  
TTCTCCAGCTGCCCAAAGACATGGTGGTGCAGCTCCTGTCCCATGAAGA  
GCTGGAGACGGAAGATGAAAGACTGGTTTATGAGGCTGCCCTTAACTGGG  
TCAACTATGACCTGGAGAGGAGACACTGCCACCTGCCCGAGCTGTTGAGA  
ACCGTACGCCTGGCCTTGCTTCCCGCCATCTTCTCATGGAGAACGTCTC  
CACAGAGGAGCTGATCAATGCCAGGCAAAGAGCAAGGAGTTGGTGGACG  
AGGCCATCCGTTGCAAGCTGAAGATCCTGCAGAATGACGGTGTGTTAAC  
AGTCCCTGTGCCCGGCCAGAAAGACCAGCCACGCCCTTTTCTACTGGG  
AGGGCAGACTTTCATGTGTGACAAGCTGTATTTGGTGGACCAGAAGGCCA  
AAGAGATCATCCCCAAGGCGACATCCCCAGCCCCAGGAAGGAGTTCAGC  
GCCTGTGCCATTGGCTGTAAGGTGTACGTACAGGCGGGA--GAGGCTC-  
GGAGAACGGTGTATCTAAAGATGTGTGGGTCTATGACACCGTCCACGAGG  
AGTGGTGAAGGACAGCACCCATGCTCATTGCCAGGTTTGGCCATGGCTCT  
GCTGAGCTCAAACACTGCCTCTACGTGGTTGGAGGACACACAGCAGCCAC  
TGGCTGCCTCCAGCCTCTCCGTCTGGATGAGTACATCGTAGTGTTCAGT  
CGTTCCACAACGAGGCTGATTCTGAACGAAGCGGAGCTGATCCTGGCGCT  
GGCCCAAGAGTTTCAGATGAGGGTGGTCACTGTGTCCCTGGAGGAACAGT  
CTTTCACAGCATCGTACAGGTCATCAGTCGGGCCCTCCATGTTGGTTAGT  
ATGCACGGAGCTCAGCTCGTCACCTCCCTCTTCTGCTAGAGGAGCCGC  
CGTGGTAGAGCTTTTCCCCTACGCTGTGAACCCGGAACAGTACACCCCAT  
ACAAAACCCTAGCCTCCCTACCAGGCATGGACCTTCAATACGTTTCCCTGG  
AGGAACACTATTGAGGAGAACACCGTCAACCATTCAGACAGACCTTGGGA  
CCAAGGAGGCATACCCATTTGGAGAAGGAAGAGCAGGAGAGAATCCTAG  
CCGGCAAGGATGTCCCAGGCACCTATGCTGCCGCAACCCGGAGTGGCTC  
TTCAGGATCTACCAGGACACTCTGGTAGACATCCCGTCCCTCCTGGAAGT  
CCTCAA---GGAAGGCCTGAAG---ATGAGGCCAGGCTTGAAGAA---GT  
CCAGGCCGGCCAGCACGGTTCACCCGGGCGGGTCCGAGAACCCAGTGC  
CAGACTTCGGTTCAGGCCACCAACGAGGCTAAACTCACAGTGTCTGGCA  
GATCCCGTGAACCTCAAGTACCTGAAGGTGCGAGAGGTGAAGTACGAGG  
TATGGATCCAGAAAAGGACACAAGCAAGGGAACCCCTGGAGGATCAAATC  
ATTCAGGCAAACCTGCACTGGAGGCTTTTGGTAATGCCAAAACAATCAG  
GAATGATAATTCTCCCGTTTTGGAAAATTCATCCGAATCCACTTTGGAA  
ACAGTGGTAAACTGTCTCTGCGGACATTGAGACCTACCTGCTGGAGAAG  
TCACGGTGCACCTTTCAGCTTAAGGCAGAGAGGAACTACCACATCTTCTT  
CCAGATCTTGTCCGAGCAAAGCCAGAGCTTCTGGACATGCTGTTGATCA  
CCAACAACCCCTATGACTACAGCTACATCTCCCAAGGAGAAGTAACTGTA  
GCATCCATCAATGATTCCGAAGAGCTGATGGCCACTGACAGTGCCTTTGA

TGTGCTTGGCTTCACGCAAGAGGAGAAGATGGGAGTCTATAAGTTGATAG  
GGGCCATTATGCACTATGGCAACATGAGGTTCAAGCAAAGCAGCGAGAG  
GAACAGGCTGAGCCTGACGGTACAGAGGCTGCTGATAAGTCAGCTTATCT  
AATGGGGCTGAATTCAGCAGACCTAATCAAGGGACTCTGCCATCCCAGAG  
TCAAGGTTGGGAATGAGTATGTCACCAAAGGCCAGGGTGTAGATCAAGTC  
TACTACCCCAACAAGGAGGCCTTCAAGTGCAGGAGTGC GGCAAGCACTA  
CAACACCAAGCTGGGATACAAGCGTCATGTGGCCATGCACTCGGCCACGG  
CGGGGACCTCACCTGCAAGGTGTGCATGCAGAGCTACGAGAGCACGCCG  
GTGCTGCTGGAGCACCTCAAGAGCCACTCGGGGAAGTCGTCGGGTGGCGC  
CAAGGAGAAGAAGCACCCGTGCGACCACTGCGACCGCCGCTTCTACACGC  
GCAAGGACGTGCGGCGGCACATGGTCGTCCACACGGGCCGCAAGGACTTC  
CTGTGCCAGTACTGCGCCAGCGCTTCGGCAGGAAGACCACCTGACGCG  
GCACGTGAAAAGAGCCACTCGCAGGAGCTGCTGAAGATCAAGACGGAGC  
CTCCGGACATGCTGGGCCTCCTGGGCACCGGCTCGCCGCCTTGCTCCGTC  
AAGGAGGAGCTGAGCCCCATGATGTGCAGCATGGGTCCCAACAAAGACCC  
CATGATGGGCAAGCCCTTCCCCAGCGGGACGCCCTTCCCCATGGGCATGT  
ACAACCCCCACCAC-----CTGCAGGCCATGTCTAACCCCGGGGTGGGC  
CACCCG-----CACCCCTCCCTCATGCCCGGCTCCCTGTTCGGCGGCGAT  
GGGCATGGGCTGCCACATGGAGTATCTCATCTATGCTTCCTTCTCCTTCA  
TGGGATGTTTACAAAATCAGCGACGGGTGCAACGTAGTGAATTTGCTGGCG  
AGTAACTCTCCGAGCGTCTCGTACGCTCTGACGCAGCAGAAGTACTTCAG  
TAACTATAGCCCCGTGATYGGGTTTTACATCTACGAGCCATCGAGTACT  
GGAACTCCACGGTGCAGGAGCACCTGAAGACGCTGAGCCACGGCTTCAAT  
AAGATCTCTTGGGTGGACAATTTTCATCCACTACCTGCGGGCGGTGAACCT  
GAGCGCGTCGACCAAGGCCGACTTYGTTGCCGTCTCAAGGGCTCCTTCC  
TGCGGAGCCCGGTGTACCAGCACTTACAGAGGACATCATCTTCTCCAAG  
A---GCCACGAGAACA-----ACGAGTACGACATCATCGCCTCGCGCAT  
GTACCTGGTGGCGCGCACCCACGGAGAAGAGGGCGGAGGATGTGGTGGAGC  
TGCTGGAGAAGCTCCGGCCGCTGATGTTGATCAACAGCATCAAGTTCATT  
GCCTTCAACCCACGTTTCGTCTTCATGGACCGCTACAGCTCCTCGGTCAT  
CTCGCCCATCCTCACCTCGGGCTTCAGCGTGCTCACCATCCTCATCCTCA  
CCTTCTCCTGGTCATCAACCCGCTGGGGAACCTGTGGCTCATCCTGACG  
GTCACGTCCGTTGGAGCTGGGCGTGCTGGGCCTGATGGGCTACCACACATT  
CGAGTGGCAGCCGGCCCTGAAGAACGTGTCCCCATCCTGCCACGTGGGGA  
TCATCAACGGGCTTTCGGGTGGGCCACCTCGGTGGACGACGTCCCTGCT  
GACACCATCACCCGCCGTTTTCGCTACGATGTGGCGCTCGTATCGGCCCT  
GAAGGACCTAGAGGAGGACATCGTGGAAGGACTGAGGGAGTGTGGGCTGG  
AAGACAGCACTTGTACCTCAGGCTTCAGCGTTATGATCAAGGAATCCTGC  
GATGGCATGGGAGACGTCAGCGAGAAGCACGGCGGGGGGCCACCGGTGCC  
CGAGAAGGCCGTGCGTTTTCTCCTTACCCTCATGTCCGTCTCCGTCCAGG  
CTGACGGAGAAGAG-----GAGGAG  
GCTGTGCTCTTCAGGGAGCCAAAGCCCAACTCCGAGCTGTCTGTAAAGCC  
CCTGTGCCTGATGTTGTGGACGAGTCTGACCACGAGACGCTCACCGCCG  
TCCTGGGGCCTTTGATCGCGGAGAGGAACGCGATGAAGGAAAGCCGMCTC  
ATCCTCGCGATGGGAGGCCTCCCGCGCTCCTTCCGTTTCCACTTCAGAGG  
CACGGGCTACGATGAGAAGATGGTGCAGAGATGGAAGGCCTGGAGGCCT  
CGGGCTCCACCTATACTGCACTCTTTGTGACTCCACTCGGGCAGAAGCC  
GCTCACAACATGGTGCTCCACTCCGTCACCCGCAGCCACGAGGAGAACCT  
GGAGCGCTACGAGATATGGAGGACCAACCCCTTCTCGGAGTCCGCCGTGG  
AGCTGCGAGATCGGGTCAAAGGGGTCTCCGCCAAACCGTTCATCGAGACC  
CATCCGACTATGGACGCGTTGCATTTGTGACATAGGTAATGCCACTGAATT  
CTACAAGATCTTCCAGGATGAGATCGGGGAGGTGTTCCAGAAGGC---CA  
AC---CCAAGCCGGGAGGAGCGGCGCAGCTGGCGGGCAGCCCTCGATAAA



-----  
-----  
-----  
-----  
-----  
-----  
-----  
-----  
-----  
-----  
-----  
-----  
-----  
-----  
-----  
-----  
-----  
-----  
-----  
-----  
-----  
-----  
-----  
-----  
-----

>*Lestrolepis japonica*  
AGCCTGCTAATCCGAGCAGAATAAGCCAACCGGGGGCCCTATTGGGCGA  
CGACCAGATTTATAATGTCATCGTTACAGCCCACGCTTTCGTGATAATCT  
TCTTCATAGTCATGCCCGTTATAATTGGGGGCTTCGAAACTGACTAATC  
CCACTAATAATCGGAGCCCCTGATATGGCTTTCGCCGAATAAATAACAT  
GAGCTTCTGACTTCTTCCCCCTCTTTTCTCCTACTTCTTGCCCTCCTCTG  
CCGTCGAAGCTGGGGCCGGCACCGGATGAACAGTTTACCCCCCTCTTGCG  
AGCAACTTGGCTCATGCAGGTGCTTCTGTGGACCTGACTATTTTTTCCCT  
TCACTTAGCCGGGATTTTCATCGATCCTAGGAGCCATTAATTTTATTACCA  
CAATCATTAACATAAAAACCTCCAGCTATCACGCAATATCAAACCCCTCTA  
TTCGTGTGAGCCGTTTTAATCACCGCTGTCTCCTCCTCCTCCTCCTCCTCC  
TGTTCTAGCCGCAGGGATCACAATACTACTCACAGACCGGAACTTAAACA  
CAACTTTCTTCGACCCGGCAGGAGCGGCGACCCAATTCTGTACCAACAC  
CTGTTTTGATTCTTTGGCCACCCAGAGGTATATATTTTGTGATCTTACCCG  
ATTTGGGATAATCTCTCACATTGTGGCATACTACTCAGGAAAAAAGAAC  
CTTTTGGGTATATGGGTATAGTATGGGCAATAATAGCAATTGGCCTCCTG  
GGGTCATCGTATGAGCCCACCACATATTTACAGTGGGGATAGACGTAGA  
CACACGAGCATATTCCTCGAGAGGAACCTGCACCCATCCAAGTGCCTTGG  
CATGCTGCTACTGTCAGATGCCACCAGTGCACCAAGCTGTCAGAGCTGT  
CCTGGGGTATGTGCCCTCAGCAACTTCCCTGCCATCTGCAAGACGGAAGAC  
TTCTCCAGCTGCCCAAAGACATGGTGGTCCAGCTTCTGTCCCATGAAGA  
GCTGGAGACTGAAGATGAGAGACTGGTTTATGAGGCTGCCCTTAACTGGG  
TCAACTATGACCTGGAGAGGAGACACTGCCACCTGCCAGAGCTGTTGAGA  
ACCGTACGCCTGGCCTTGCTTCCCGCCATTTTCTCATGGAGAACGTCTC  
CACGGAGGAGCTGATCAATGCCAGGCAAAGAGCAAGGAGTTGGTGGATG  
AGGCCATCCGTTGCAAGCTGAAGATCCTGCAGAATGACGGTGTGGTCAAC  
AGTCCCCTGTGCCCCGCCAGAAAGACCAGCCACGCCCTTTTCTGCTGGG  
AGGGCAGACCTTCATGTGTGACAAGCTGTACTTGGTGGACCAGAAGGCCA  
AAGAGATCATCCCCAAGGCGGACATCCCCAGCCCCAGGAAGGAGTTCAGC  
GCCTGTGCCATTGGCTGTAAGGTGTACGTACAGGGCGGGA--GAGGCTC-  
AGAGAACGGTGTATCTAAAGATGTGTGGGTCTATGACACCGTCCACGAGG



AGTGGTCCAAGGCAGCACCCATGCTCATTGCCAGGTTTGGCCATGGCTCT  
GCCGAGCTCAAACACTGCCTCTATGTGGTTGGAGGGCACACAGCAGCCAC  
TGGCTGCCTCCCAGCCTCTCCGTCT-----  
-----  
-----  
-----  
-----  
-----  
-----  
-----  
-----  
-----  
-----  
-----  
-----  
-----  
-----  
-----  
-----

-----AAAAGGGATACAAGCAAGGGAACCTTGGAGGATCAAATC  
ATTGAGGCAAACCTGCACTAGAGGCTTTTGGGAATGCCAAAACATTGAG  
GAACGATAATTCCTCCCCTTTTGGAAAATTCATCCGAATCCACTTTGGAA  
CCAGTGGTAAACTGTCTCCTGCAGACATTGAGACCTACCTGCTGGAGAAG  
TCACGGTGCACCTTTCAGCTTAAGGCAGAGAGGAACCTACCACATCTTCTT  
CCAGATCTTGTCCAATCAAAGCCAGAGCTGCTGGACATGCTGTTGATCA  
CCAACAACCCCTATGACTACAGCTACATCTCCCAAGGAGAAGTGACCGTA  
GCATCCATCAATGATTCCGAAGAGCTGATGGCCACTGACAGTGCCTTTGA  
TGTGCTTGGCTTCACGCAAGAGGAGAAGATGGGAGTCTACAAGTTGATAG  
GGGCCATTATGCACTATGGCAACATGAGGTTCAAGCAAAGCAGCGAGAG  
GAACAGGCTGAGCCTGATGGTACAGAGGCTGCTGATAAGTCAGCTTATCT  
AATGGGGCTGAATTCAGCAGACCTAATCAAGGGACTCTGCCATCCTAGAG  
TCAAGTTGGGAATGAATATGTCACCAAAGGCCAGGTTGTAGATCAAGTC  
TACTACCCCAACAAGGAGGCCCTCAAGTGCGAAGAGTGTGGCAAGCACTA  
CAACACCAAGCTGGGATACAAGCGCCATGTGGCCATGCACTCGGCCACAG  
CGGGGGACCTCACCTGCAAAGTGTGCATGCAGAGCTACGAGAGCACCCCG  
GTGCTCCTGGAGCACCTCAAGAGCCACTCGGGGAAGTCCTCGGGGGCGC  
CAAGGAGAAGAAGCACCCTGCGACCCTGCGACCCTGCGGCCGCTTCTACACGC  
GGAAGGACGTCCGGCGGCACATGGTCGTCCACACGGGCGGGAAGGACTTC  
CTGTGCCAGTACTGTGCCCAGCGCTTCGGCAGGAAGGATCACCTGACGCG  
GCACGTGAAAAAGAGCCACTCGCAGGAGCTGCTGAAGATTAAGACGGAGC  
CTCCGGATATGCTGGGTCTCCTGGGCTCCGGGTCCGCGCCTTGCTCCGTC  
AAGGAGGAGCTGAGCCCCATGATGTGCAGCATGGGTCCCAATAAAGACCC  
CATGATGGGCAAACCCTTTCCCAGCGGGACCCCTTCCCATGGGCATGT  
ACAACCCCCACCAC-----CTCCAGGCCATGTCTAATCCCGGGGTGGGA  
CACCC-----CATCCCTCCCTTATGCCCCGGTCCCTGTTCAGCAGCTAT  
GGGCATGGGCTGTCATATGGAA-----  
-----  
-----  
-----  
-----  
-----  
-----  
-----  
-----  
-----





CGGTAGAAGCCGGAGCAGGGACAGGATGAACAGTTTACCCTCCTCTAGCA  
AGCAACCTTGCCCATGCAGGAGCTTCCGTAGACCTAACTATTTTCTCCCT  
TCACCTCGCTGGGATTTCTCAATCTTGGGGCAATCAACTTCATCACAA  
CCATTATCAACATGAAACCCCCAGCTATCTCCCAGTACCAAACACCCCTT  
TTTATCTGGGCTGTCTTATTACAGCTGTGCTCCTTCTCCTCTCCCTTCC  
CGTCTTAGCCGCAGGAATTACAATACTACTTACAGACCGAAACCTAAATA  
CCACCTTCTTTGACCCCGCTGGAGGGGGAGACCCCATTTCTTATCAACAT  
CTCTTCTGATTCTTTCGGCCACCCCGAAGTCTACATTTTGATTCTTCCAGG  
CTTTCGGCATGATCTCCACGTCGTCGCCTACTACGCGGGCAAAAAAGAAC  
CCTTCGGCTACATGGGCATGGTCTGAGCAATGATGGCTATTGGACTTCTA  
GGCTTCATCGTTTTGAGCCACCACATGTTTACAGTCGGAATGGACGTTGA  
CACTCGTGCCTATTCTATGAGAGAAATCTGCACCCGTCTAACTGCTTGGG  
CATGCTGCTGCTGTCMGACGCCACACCTGCACCAAGCTCTMCGAGCTYT  
CCTGGGGCATGTGWCTCAGCAACTTCCCTGCCATCTGCAAGACGGAGGAC  
TTCTTGCAGCTGCCCAAGGACATGGTGGTGCAGCTGCTGTCCACGAGGA  
GCTGGAGACGGAGGACRARAGGCTGGTGTACGAGGCGGCTCTCAGCTGGG  
TCAACTACGACCTGGAGAGGAGGCACTGCCAGCTGCCCGAGATGCTGAGG  
ACAGTCCGCCTAGCCCTGCTGCCCGCCATCTTCCCTCATGGAGAACGTATC  
GACGGAAGAGCTGATCAACGCCAGGTCAAGAGCAAGGAGCTGGTGGACG  
AGGCTATCCGCTGCAAGCTGAGAATCCTGCAGAACGAAGGCGTGGTCAAC  
AGCCTGTGCGCCCGGCCAGGAAGACCAGCCACGCCCTGTTTCTGCTCGG  
TGCCAGACCTTCATGTGTGACAAGCTGTACCTGGTGGACCAGAAGGCCA  
AGGAGATCATCCCCAAGGCAGACATCCAAGCCCCAGAAAGGAGTTCAGY  
GCCTGTGCCATCGGCTGCAAGGTCTACGTACCCGGGGGAA--GAGGCTC-  
GGAGAACGGGTGTCCAAGACGTGTGGGTYTAMGACACCATCCAGGAGG  
AGTGGTCCAAGGCGGCGCCCATGCTCATCGCCAGGTTTCGGCCACGGCTCT  
GCAGAGCTGAAACACTGCCTCTACGTSGTGGGGGGGCACACAGCTGCCAC  
GGGC-----GGAAGAGTACATAGTGGTGTTCAGC  
CGTTCCATTAACAGGCTGATTCTTAACGAGGCAGAGCTCATTCTGGCCCT  
AGCACAGGAGTTCAGATGAAGGTTGTGACTGTGTCTCTGGAGGAGCAAT  
CCTTTGCTGCTATAGTGAAGGTGGTCAGTGAGGCCACCATGTTAGTCAGT  
ATGCACGGAGCCCAACTGGTGTCTCTCTTTTCTGCAAGAGGGGCGC  
AGTGGTTGAGCTTTTCCCCTATGCAGTGAACCCAGAGCAGTACGCTCCCT  
ACAAAACCTTAGCCTCACTCCCTGGCATGGACTTGCAATGTGGCCTGG  
AGGAACACGATAGAGGAGAATCGCTGGCCTACCCCGAGAGGCCCTGGGA  
GCAGGGGGGCATACCCACTTGGAGAAGGACGAGCAAGATCGCATCCTGG  
CCAGCAAAGAGGTACCGAGGCACCTGTGCTGTGCAACCCAGAGTGGCTC  
TACCGTATCTACCAGGACACCATAGTGGACATCCCGTCTTTACTGGACAC  
CCTCAG---AGAGACCTGAAA---ACCAGGCCAACCTGAAGAA---GG  
CCAAGCCTGCCAGCACGGTTCACCCGGGCCGGGTGAGAGAGCCCCAGTGC  
CAGACCTCAGTCCAGGCCACCAACGAGGCCAAGCTCACAGTGTCTTGGCA  
GATCCCCTGGAACCTGAAGTACCTGAAGGTCCGGGAGGGAAATA-----  
-----AAGAGGGATGCAAGCAAGGGAACCCTAGAGGATCAAATC  
ATCCAGGCTAACCTGCACTCGAGGCTTTTGGTAACGCCAAAACATTTGAG  
AAATGATAATTCATCCCGTTTTGGCAAATTCATCCGTATTCATTTCCGAC  
AAAGTGGCAAATTTGCTCTGTCAGATATAGAGACGTATCTGCTTGAGAAG  
TCACGTTGTACCTTTCAGCTGAAATCAGAGAGGAACTACCATATCTTCTT  
TCAGATCTTGTCCAATGAAAAGCCAGAGCTGTTGGACATGCTGTTGATCA  
CCAACAATCCATATGACTACGCCTACATCTCCCAAGGAGAGGTGACAGTA  
GCATCCATCAACGATTTCTGAGGAGCTGATAGCCACTGACAGTGTCTTTGA  
TGTGCTGGGCTTTACTGCAGAGGAGAAAATGTCCGGTCTACAACTGACAG  
GTGCCATAATGCACTATGGCAACATGAGGTTCAAGAACAAGCAGCGGGAG  
GAGCAGGCAGAGCCTGACGGTACAGAGGCTGCTGACAAGTCAGCTTATCT

GATGGGACTGAACTCTGCAGATCTCATTAAAGGACTCTGCCATCCAAGAG  
TCAAGGTTGGCAATGAGTATGTCACCAAAGGTCAGAGTGTGATCAAGTC  
TACTACCCCAACAAGGAGGCCTTCAAGTGCAGGAGTGTGGCAAGCACTA  
CAATACCAAGCTGGGATACAAGCGCCATGTGGCCATGCACTCAGCCACGG  
CGGGGACCTCACCTGCAAAGTGTGCATGCAGAGCTACGAGAGCACGCCC  
GTGCTCTTGGAGCACCTCAAGAGCCACACGGGGAAGTCGTGAGGAGGCGC  
CAAGGAGAAGAAGCATCCATGCGACCCTGCGATCGCCGCTTCTACACAC  
GGAAGGACGTCCGGCGGCACATGGTGGTGCACACGGGCGGAAGGACTTC  
CTGTGCCAGTACTGCGCGCAGCGCTTCGGCCGCAAGGACCACCTGACGCG  
CCATGTGAAGAAGAGCCACTCACAGGAGCTGCTAAAGATCAAGACGGAGC  
CTCCAGACATGCTGGGCCTGCTGGGCTCTGGCTCGCCGCCCTGCTCCATC  
AAGGAGGAGCTCAGCCCCATGATGTGCAGCATGGGTCCCAACAAGGACCC  
CATGATGGGCAAACCCCTTCCCCAGCGGGACCCCTTCCCCATGGGCATGT  
ACAACCCCAACCAC-----CTCCAGGCCATGTCCAGTCCAGGGGTGGGG  
CACCCC-----CACCCCTCCCTGATGCCAGCTCTTTGTGTCAGCGGCCAT  
GGGCATGGGCTGCCACATGGAGTACCTGATCTACGCTTCCTTCTCCTTCA  
TGGGATGTTTACAAAATCAGCGATGGGTCAAACATCGTGAACCTGATGGCG  
AGTAACTCTCCGAGCGTGTCTTTTCGCGCTCACCCAGCAGAAGTACTTCAG  
TAACTACAGCCCCGTTATTGGGTTCTACATTTACGAACCCATCGAGTACT  
GGAACGCCACGGTGCAGGAGCACCTGAAGACGCTCAGTCACGGCTTCAAC  
AAGATCTCCTGGATCGACAACCTTCTTCCACTACCTGCGGGTGGTGAACGT  
GAGCGCTCGACCAAGAGCGACTTCATCAGCATCCTGAAGGGCTCCTTCC  
TGCGCAGCCCGGAGTACCAGCACTTCAACGAGGACATCATCTTCTCCAAG  
A---ATCGCGAGAGCG-----ACGAGTACGACATCATCGCCTCGCGCAT  
GTACCTGGTGGCGCGCACCACCGAGAAGAAGCGCGAGGAGGTGGTGGAGC  
TGCTGGAGAAGCTGCGTCCGCTGATGCTGATCAACAGCATCAAGTTCATC  
GCCTTCAACCCACCTTTCGTCTTCATGGACCCTACAGCTCCTCGGTCAT  
CTCGCCCATCCTTACCTCAGGCTTCAGCGTGCTCACCATCCTCATCCTCA  
CGTTCTTTCTCGTCATCAACCCGCTGGGGAACCTTCTGGCTCATCCTGACG  
GTCACGTCCGTGGAGCTGGGCGTGCTGGGTCTGATGGGCTACCACCCCTT  
CGAGTGGCAGCCGGCCCTCAAGAATGTGACCACGTCATGCCATGTGGGCA  
TCATGAATGGGCTCGCAGGATGGACAGCCTCAGTGGATGATGCCCTGCR  
GATAACATAACCCGGCGGTACCGCTATGACGTGGCCCTGGTGTGCGCCCT  
GAAGGATCTGGAAGAGGACATCATGGATGGGCTACGGGAGCGAGGGCTGG  
ACGACAGCGCCTGCACCTCTGGCTCAATGTGATGATCAAGGAGTCTGC  
GATGGCATGGGGGACGTCAGTGAGAAACATGGTGGTGGGCGCCGGTCCC  
CGAGAAGGCTGTGCGCTTCTCCATTACCGTCATGTCTGTCTCTGTCCAGG  
CTGAAGGAGAGGAG-----GAGGCG  
GTCACCATCTTCCGGGAGCCCAAGCCAACTCTGAACTGTCCTGTAAACC  
ACTGTGCTTGATGCTTGTGATGAATCGGACCACGAGACACTCACGGCAG  
TCCTAGGGCCCTTGGTGGCCGAGCGGAATGCTATGAAGCACAGCCGGCTC  
ATTCTGTCCCTGGGTGGGCTCCCTCGCTCCATCCGCTTCCACTTCAGAGG  
AACGGGTTACGATGAGAAGATGGTGCCTGAGATGGAGGGCCTGGAGGCCT  
CTGGCTCCACCTATATCTGCACCTTGTGTGACTCCACCAGGGCAGAGGCC  
TCCCACAACATGGTGTCTCACTCCATCACCCGCAGCCACGATGAAAACCT  
GGAGCGCTACGAGTGTGGAGGACCAACCCCTTCTCGGAGTCCGCAGAGG  
AGCTGCGGGACCGGGTCAAAGGTGTCCTTGCCAAGCCCTTATGGAGACC  
CAGCCCACACTGGATGCCCTGCACTGCGACATCGGCAATGCCACTGAGTT  
CTACAAGATCTTCCAGGACGAGATCGGGGAGGTGTACCGCAGCCC---CA  
AC---CCCAGGCGAGAAGAGAGACGGAGCTGGAGGGCCACTCTGGACAAG  
CAGCTGAGGAAGAAGATGAAGTTGAGGCGGTGATGCGAATGAACGGGAA  
CTATGCGCGTGGCTGATGACCCGGCAGGCGGTAGAGGTGGTGTGTGAGC  
TGGTGCCGTCAGAAGAGAGGCGAGAGGCCCTGAGGGAGCTGATGGGGCTC

TACCTTCAAATGAAGCCAGTGTGGCGCTCTTCTGCCAGCCACTGAGTG  
CCCAGACCAGATGTGTCGCTATAGCTTCAACTCCCAGCGCTTCGCAGAGC  
TCCTCTCCAGCACCTTCAAGTACAGGTA-----

-----TCCTACA  
CCATCGAGATGGGCACCAAAGGGCCGCAGTGGAAAAGAGAGTCCCCAGCCG  
TTCTCCTGCTCCATCGAGGACCCACCAAGCAGACCAAGTTTAAAGGCAT  
CAAGACGTACATTTTCGTACCGGGTCACCCCGAGCCACATGGGGCGGCCTG  
TGTACCGGCGCTACAAGCACTTTGACTGGCTGTACAATCGCCTGCTGCAC  
AAGTTCACCGTCATCTCCGTGCCTCACCTGCCGGAGAAGCAGGCCACAGG  
GCGCTTCGAGGATGACTTCGTGCGAGAAGCGCAAGAGGCGGCTGGTTCTCT  
GGATCAACCACATGACCAGCCACCCGGTCCTGTCTCAGTACGAAGGCTTC  
GAGCACTTCCTCATGTGCGCCGACGACAAGCAGTGGAAGCTGGGGAAGCG  
GCGGGCGGAGAAGGACGAGATGGTGGGCGCCACTTCATGCTGACGTTCC  
AGATTTCCACGGAGCACCAGGACCTGCAGGACGTGGAGGAACGCGTGGAC  
AACTTCAAGTCCTTCGCCAAGAAGATGGACGACAGCGTGTTCAGCTGAC  
GCACGTGGCGTCGGAAC TGGTGC GGAAGCACGTCCGGAGGGTT CAGGAAGG  
AGTTTCAGCGGCTGGGGAACGCCTTCCAGTCCGGTCAGCCAGGCCCTTCATG  
CTGGATCCTCCGCACAGCTCGGACGCCCTCAACAACGCCATCTCTCAT--

-----GCCAAATCTCGCTTT  
CACCTTGGCGTAGGGACTGGTCCTGGCACAGACC--GCAGCGTCCCCT  
TAGTAACAGCTTGCTGTCCCCGCAACAAACCGAAGAGCACACAGTTG--  
CTTCCCCGCAGCGATGGTTTGTACCC--CTGCCAACAACCGACTGGAC  
TTCGCCGCCTCGGCATACGACGCCGCCGCGGCTGCTGATTTCCGCCGTAA  
CGCGGCCACCTTGCTGTCTTACGCAGCTGCTGGAGTAAAGGCC--  
TTCCCTGCCACTGCTGGCTGCTCCAACAGACCGTTGGGTTATTATACC  
GACCCATCCG--GCTGG--GGCACGCGCACACCACCTCAGTACTGC--  
-----AGTAAATCCAGCTCGGTGCTTTCATGCTGGCCCACAAATGCGC  
TTGGAAGCCGAACAGGCA--CGTCCAATTACCTGC-----CGGAA  
GA--CGGG--GACCC--CATCCCCACGGAGAGGTCTCCG--AT--  
CGGCGTGCCAGAGGAG--ACCAAACCAAAGACTT-----GTCCGA--  
-GTCCAGCTGGATAGAG--ACGTCGTCTTCAATAAAGTCGATAGATTCA  
AGTGATTCTGGGATCTTTG--AGCAGGCCAAACGGAGAAGAATTTACC  
GTCTGCCACACCG-----GTNTCAGAGACAGTTTCCCCGCTGAAATC









-----  
-----  
-----  
-----  
-----  
-----  
-----  
-----  
-----

-----NNNNNNNNNNNCTTTCACCCCTGGCGT

GGGGACTGGTCCTGGCACGGAGC---GCAGCGTCCCCTCGGCCACAGCT  
TGCTGTCCCCCGCAGCAAACCGACGAGCCAGTGTGCCACCCCCCGCAG  
MGATGGTTTGTACCC---CTGCCAACAACCGACTGGACTTTGCTGCCTC  
GGCATACGACGCCGT-----GATTTGCGCGGTAACGCGGCCACCT  
TGCTGTCTACGCAGCGGCCGAGTGAAGGCTC-----TTCCCTGCCG  
ACTGCAGGCTGCTCCAACCGGGCGCTTGGCTATTACGCAGACCCGTCAG-  
--GCTGG---GGAGGACGCACACCGCCGAGTACTGCGGCGTAAACAACA  
AATCCAGCTCGGTCTTTTCTGCTGGCCCGCTAACTCTATCGGGGGCCGA  
GCAGGTA---CC---AACTACCTGY-----CCGAGGA---AGGA--  
-GACTC---CATCACGACAGAGAGGTGCGCG---AT---CGGCGGCTCGG  
ACGAG---ACCAAACCCAAAGACATGAC---ATCAGA---GTCGAGCTGG  
ATAGAG---ACGCCGTCTCCATTAAGTCCATTGATTTCGAGCGATTCTGG  
TATCTTTG---AACAGGCCAAACGGAGAAGAATCTCACCTTCTGCCACGC  
CG-----GTTTCAGAGACAGTGTCCCCTTAAAGTCNNNNCATCACTCAA  
CAGGCCAAGTCACAGAGAGAGAAGTAGCGTTGGGGATAAATCCGTTTCGCG  
GATGGGATGGGCGCCTTCAAATAAACCACAGCTCCCACGATATCGGCTC  
CGG---ACAACGGCGTTTTCTCCAGGGC---CCCGGTAC---GCGG  
CAGCCGCCCTAGGA---CACCATCA-----CCACCCGAGCCACGTTGGC  
TCT---TACTCCACGGCGGCTTTCAACTCCACGAGGGACTTTCTCTTCAG  
AAATCGGGGCTTCGGGGACGCCACCGG-----GGCGCAGCACA  
GTTTGTTCGCCTC-----CGGAAGTTT---C-----GCTGGGCCA  
CATGGACACTCAGATGCAGCGGGGCACCTGCTCTTCCCGGGGCTCCACGA  
G---CAAGCGGCGAGCCATGCGTCTTCCAACGTGGTCAACAGCCAGATGC  
GGCTGGGCTTCTCGGGGACATGTACGGACGGGCGACCAGTACGGCCAC  
GTTACGAGCCCGCGGT---CCGACCACTACGCTTCGACCCAGCTGCACGG  
CTATGGCCCCATGAACATGAATATGGCCGCA---CATCACGGAGCAGGGG  
CCTTCTTTTCGATACATGAGGCGCCGATCAAGCAAGAGCTCATCTGCAAG  
TGGATCGAGCCGGAGCAGCTGACGAATCCCAAAAAGTCGTGCAACAAAAC  
TTTTAGCACGATGCACGAGCTTGTGACCCATCTGACGGTGGAGCATGTGG  
GGGACC GGAGCAGACCAACCACATCTGCTTCTGGGAGGAATGCGCCAGA  
GAGGGAAAGCCATTCAAAGCCAAATACAACTTGTAATCATATTAGAGT  
ACACACCGGAGAAAAGNNNNNNNNNNNNNNNNNNNNNNNNNNNNNNNNNNNNNN

>*Lophius americanus*

AGCTTGCTCATTTCGGGCTGAACTGAGCCAACCCGGCGCCCTCTTAGGGGA  
TGACCAAATCTACAACGTTATTGTTACCGCTCACGCCTTTGTAATAATTT  
TCTTTATGGTTATAACCAATTATGATTGGAGGGTTTGGCAACTGACTTATC  
CCCTTAATGATTGGGGCCCCGGACATAGCCTTCCCCGAATAAAACAACAT  
AAGCTTCTGGTACTTCCCCCTTCTTCCCTCCTGCTACTTGCATCTTCCG  
GGGTGAAGCCGGAGCAGGCACTGGATGAACCGTCTACCCCCGTTGGCA  
GGGAACCTTGCACATGCAGGAGCCTCTGTTGACCTAACTATTTTTTCCCT  
CCACCTAGCAGGAATTTCTTCAATCCTAGGAGCAATCAACTTCATCACAA  
CAATTATTAACATAAAACCCCCACAATCTCCCAGTACCAGACACCTTTA

TTCGTTTGAGCTGTTTTAATCACAGCAGTTCTTTTACTCCTATCCCTACC  
CGTGCTTGCCCGCAGGCATTACCATGCTCTTAACAGACCGAAACTTAAACA  
CCACCTTCTTCGACCCACAGGAGGAGGGGACCCCTATCCTATAACCAACAC  
TTGTTC-----  
-----  
-----  
-----

-----TTCCTTGAGACAAACCTCCACCCGACAAATTGCCCTGG  
CATGCTATTGTTGCTGATGCCACCAGTGCACCAAGTTGTCAGAGCTCT  
CATGGGGTATGTGCCCTCAGCAACTTTCCCACTATTTGCAAGACAGAGGAC  
TTCTCCAACCTGCCGAAAGATATGGTGGTGCAGCTTTTGTACATGAAGA  
ACTAGAGACCGAAGATGAGAGACTTGTATGATGCTGCCCTGAATTGGA  
TCAACTATGATCTGGAAAAGCGGCATAGCCACCTTCCAGAGCTCCTGAAA  
ACAGTCCGTCTGGCTCTGCTACCCGCCATCTTTCTTATGGAGAACGTCTC  
TACAGAAGAGCTGATAAACGCCAGGCTAAGAGCAAAGAGTTAGTGGATG  
AAGCTATTTCGCTGCAAGCTGAAGATCCTGCAGAATGATGGTGTGTTAAC  
AGCCTGTGTGCTCGACCCAGAAAAACAANCCATGCGCTTTTTCTTCTGGGT  
GGACAGACTTTTATGTGTGACAAGTTGTATCTGGTGGACCAAAAAGCCAA  
AGAGATCATCCCCAAAGCTGACATTTCCAGCCCAAGGAAGGAGTTCAGTG  
CCTGTGCCATCGGCTGTAAAGTGTACATCACTGGTGGGA--GAGGCTC-T  
GAGAATGGCGTGTCCAAAGATGTATGGGTCTACGACACGGTCCATGAGGA  
ATGGTCAAAGGCGGCACCCATGTTAATCGCAAGGTTTGGCCATGGCTCTG  
CCGAGCTCAAGCACTGCCTTTATGTGGTAGGGGGTCACTGCAGCAACG  
GGCTGCCTCNNNNNNNNNNNNNNNAGATGAATGCATAGTTGTGTTTCAGTCGCTCAACAACAAGAT  
TGATACTGAATGAAGCTGAACATAATCATGGCGCTTGCCAGGAGTTCGAG  
ATGAGAGTGGTTCACAGTGTCCCTGGAGGAGCAGTCTTCTCCAGTATCAT  
CCAGGTCATCAGCAGGGCCTCCATGTTGGTTAGTATGCATGGAGCTCAAC  
TCATAACCTCGCTCTTCCCTCCCTAGAGGAGCAGTTGTGGTTCGAGCTGTT  
CCCTTTGCTGTGAACCCAGAGCAGTACACCCCGTATAAAACCCCTGCCTC  
CTTACCGGTATGGACCTTATTATATCTCCTGGAAGAACACGAAGGAGG  
AAAACACCATAACCCATCCAGACCGATCGTGGGAACAAGGTGGTATCGAT  
CATTTGGAGAAGGAGGAACAAGAGCGAATAAAGATGAGCAGAGATGTCC  
CAGACATCTGTGCTGCCGCAACCCAGAGTGGCTTTTTCGGATCTACCAGG  
ACACTTTGGTGGACATCCCTTCCCTGGAAGTCCCTCAA---AGAGGGC  
ATGAAG---ACAAAGCCCAACTCGAAGAA---GTCAAAGCCGGCCAGTAC  
ACTCCACCCGGGCAGAGTCAGACAACCCAGTGTGACACCTCAGTACAAA  
CCAGTAATGAGGCTAACTCACGGTGTCTGAGCAGATCCCGTGGAACTG  
AAATACCTGAAAGTCAGAGAAGTGAAGTACGAGGTGTGGATCCAGAAGAA  
AGACGCCAGTAAGGGAACCCCTGGAGGATCAAATCATCCAAGCTAACCCTG  
CGCTGGAAGCCTTCGGTAATGCCAAAACACTAAGAAACGACAACTCCTCC  
CGTTTTGGGAAGTTCATCCGAATACACTTTGGTCCAAGCGGCAAGCTGTC  
ATCTGCTGACATCGAGACATACCTGCTGGAGAAGTCCCAGTCACTTTC  
AGCTCAAGGCTGAGAGAAATTACCACATCTTCTACCAGATCCTGTCCAAT  
CAGAAGCCAGAGCTGCTGGACATGCTCCTGATCACCACCAACCCATACGA  
CTACTCCTACATCTCTCAAGGAGAGGTAACCGTTTCTCAATCAACGACT  
CTGAGGAGCTGATATCCACGGACAGCGCCTTCGACGTGCTTGGCTTCACA  
GCAGATGAGAAGATGGGTGTCTACAACTAACGGGGGCCATCATGCACTA  
TGAAATATGAAGTCAAGCAGAAGCAACGCGAGGAGCAGGCTGAGCCCG  
ACGGCACGGAGGCCGCTGACAAAACAGCTTACCTAATGGGGCTGAACTCT  
GCTGACCTGATCAAGGGGCTGTGCCATCCAGAGTCAAGGTGGGAAATGA  
GTACGTAACCAAAGGCCAAAGTGTGACCAAGTGTACTACCCCAACAAGG  
AGGCCTTCAAATGTGAGGAGTGTGGGAAGCACTACAACACCAAGCTGGGA  
TACAAGCGGCATGTTGCCATGCATTCGCCACGGCGGGGGATCTCACCTG

TAAAGTGTGCATGCAGACCTACGAGAGCACGCCGGTGTGCTGGAGCACC  
TCAAGAGCCACTCTGGGAAGTCCTCAGGTGGCACCAAGGAGAAGAAACAC  
CAGTGTGACCACTGTGATCGGCGTTTCTACACAAGGAAGGATGTGAGGCG  
CCACATGGTGGTGCACACCCGGCAGAAAGGACTTCTCTGCCAGTACTGTG  
CCCAACGCTTCGGCAGGAAGGACCATCTGACGCGGCACGTGAAAAAGAGC  
CACTCACAGGAGCTGCTGAAGATCAAGACGGAGCCTCCTGACATGTTGGG  
TCTTTTAGCTTCTGGGTACCCGCCGTGCTCGGTGAAGGAGGAGCTCAGCC  
CCATGATGTGTGGCATGGGTCCCAACAAAGATCCCATGATGAGTAAACCA  
TTTCCCAGCGGGGCCCCCTTCCCGATGGGAATGTATAACCATCACCAT--  
----CTCCAGGCCATGTGCAATTCTGGGGTGGGCCACCCC-----CACC  
CATCCCTCATGCCAGTTCCTTGTCTGCAGCTATGGGCATGGGCTGTCAC  
ATGGAATACCTCATSTACGCCTCCTTCTCATTTCATGGGATGTTTGCAGAT  
CAGTGTGGATCCAACATTGTGAACCTGCTGGCCAGTAACTCTCCAGCG  
TCTCATATGCTCTGACTCAGCAGAAGTACTTTAGTAATTACAGTCCGTGTG  
ATCGGGTTCACATTTACGAGCCCATTGAGTACTGGAACTCCACGGTGA  
GGAACACCTGAAGACTCTGAGTCATGGCTTCAACAAGATATCCTGGATGG  
ACAACTTTTTCCACTACCTGCGGGTGTAAATGTGAGCGCATCCACCAAG  
AGCGACTTCATCTCCATCCTCAAGGGTTCCTTCCCTGCGTAGCCCCGAGTA  
CCAACACTTCACCGACGACATCATCTTCTCAAAGA---ACCGGGATACTG  
-----ATGAGTACGACATTATTGCCTCAAGGATGTACCTGGTGGCACGG  
ACTACAGAGAAGAAGCGTGAGGAGGTGGTGGAGCTGCTGGAGAAGCTCCG  
TCCACTGATGCTGATCAACAGCATCAAGTTCATTGCCTTCAATCCCACAT  
TTGTGTTTCATGGACCGTACAGCTCCTCCGTCATCTCACCCATCCTGACC  
TCAGGATTCAGCGTACTCACAATCCTCATCCTCACCTTCTTCCCTAGTCAT  
CAACCCTTTGGGTAACCTTCTGGCTCATCCTCACTGTGACGTCCGTGGAGC  
TGGCGCTCTTGGGTTGATGNNNNNNNNNNNNNNNNNNNNNNNNNNNNNNNNNN  
NNNNNNNNNNNNNNNNGATTAACGGGCTTTCTGGAAGGGTTCCCTC  
TCTGGATGACTCTCCAGCTAACACCATCACCCGGCGGTTTCGCTATGATG  
CACCCTGGTATCAGCATTAAAAGATCTGGAGGAGGACATCATGGAAGGA  
CTGAGAGAGAATGGAATTGAATACAGCACTTGCAACTCAGGCTTCAGAGT  
CATGATCAAAGAATCTTGGCATGGCATGGGCGACATCAGCGAGAAGCATG  
GTGGAGGACCAGCTGTCCCTGATAAAGCTGTGCGTTTCTCTTTCACTGTG  
ATGTCTGTCTCTCCTCCGACAGGGAATGAGGAA-----  
-----GAGGAGTAGCAATCTTACAGAGGCAAAGCCAACT  
CAGAACTGTCCCTGTAAGCCCCCTTGCCTAATGTTTGTGGATGAGTCAGAC  
CATGAGACACTAACAGCCATCTTGCACCCTATAATTGCAGAGCGTAAGGC  
GATGAAAGAGTCCAGACTCATCTTGAAGCATGGGTGGACTACTTCGCTCTT  
TCCAATTTCACTTCATAGGTACGGGGTATGATGAGAAGATGGTACGAGAG  
GTTGAGGGCCTAGAGGCGTCTGGGTCCACCTACGTTTGCACCTCTCTGTGA  
CTCCAGCCGTGCAGAGGCCCTGTAAGAACATGGTGTACATTCCATCACCC  
GCAGTCATGAAGAGAACTTAGAACGTTATGAAATGTGGAGAACCAACCCC  
TTCTCTGAGTCTGTTGATGAGCTGCGAGACAGAGTCAAAGGGGTCTCTGC  
CAAGCCCTTCATGGAAACCCATCCACCCTCGATGCATTACATTGTGACA  
TARGAAATGCCACCGAGTTCACAAAATATTCAGGATGAGATTGRGGAG  
GTATAACAAAAGGG---AAAT---CCAAGCCGTGAGGAGCGGCGCAGCTG  
GAGGGCAGCCCTAGATAAACAGCTGAGGAAGAAGATGAAACTCAAACCGG  
TAATGAGGATGAATGGGAACCTTGGCCGCAAGCTAATGACCAAGGAGGCT  
GTGGAGGTGGTGTGCGAGCTGGTGCCCTTAGAGGAGAGGAGGGAGGCCCT  
GAGGGAGCTTATGAGCCTTACCTCCAGATGAAGCATGTGTGGCGTGCCA  
CCTTCCCAGTCAAGGAGTGCCCTGACCAGCTGTGCGCTACAGCTTTAAC  
TCCCATCGCTTTGCTGAACTCCTCTCCTCGACCTTCAAATATAGATACAA  
TGGAAGANNNNNNNNNNNNNNNNNNNNNNNNNNNNNNNNNNNNNNNNNNNN  
NNNNNNNNNNNNNNNNNNNNNNNNNNNNNNNNNNNNNNNNNNNNNNNNNNNN

GGCCCCGTGTGGAAG

GAGAGCCCGCAGCCTTTCTCCTGCTCCATTGAAGACCCACAAAAACAGAC  
TAAGTTCAAGGGCATCAAGACCTACATTTTCGTACCGGGTCACGCCGAGCC  
ACACCGGCCATCCCGTCTACAGACGCTACAAACACTTTGACTGGCTGTAC  
AACCGCCTACTGCACAAGTTCACCGTGATCTCGGTGCCTCACCTGCCGGA  
GAAGCAGGCCACGGGGCGTTTTGAGGAGGACTTCATTGAAAAGCGCAAGA  
GGCGACTGATACTGTGGATGAACCACATGACCAGTCACCCGGTCCTCTCC  
CAGTACGAAGGTTTGGAGCACTTTCTCATGTGCGGCGACGACAAGCAGTG  
GAAGCTGGGCAAGAGACGAGCGGAGAAGGATGAGATGGTGGGCGCCATT  
TCATGCTGACCCTCCAGATCCCTAGCGAGCACCAGGACCTTCAGGATGTC  
GAGGAGCGGATCGACTCCTTCAAGTCCTTTGCTAAAAAATGGATGACAG  
CGTGATGCAGCTCACGCACGTTGCTTCGGAGCTGGTGCAGAAACACCTGG  
GCGGGTTCAGGAAGGAGTTCAGAGGCTGGGGAACGCCTTCCAGTCTATC  
AGCCAGGCGTTCATGCTGGACCCTCCCCACAGTTCGGASACCTTCAACAA  
CGCCATCTCCCACNNNNNNNNNNNNNNCTCAAACGACCTCTCTGGGTTTCATCATTGGAGTCG  
GCGTGGTTCGGAAACCTCCTGATCTCCATCCTGCTGGTTAAAGACAAAAGC  
CTGCACCGAGCACCTACTATTTCTGCTGGACCTGTGCGCCTCCGACAT  
CCTGCGCTCCGCCATCTGCTTCCCCCTTCGTCTTACCTCGGTCAAGAATG  
GATCCGCTTGGACGTACGGCACGCTGACCTGTAAGGTGATCGCCTTCCTG  
GGTGTGCTCTCCTGTTTCCACACGGCGTTTATGCTATTCTGCGTCAGCGT  
CACGCGCTACCTGGCCATCGCACATCACCGCTTCTACACCAAGAGGCTGA  
CCTTCTGGACCTGCCAGCTGTATCTGCATGGTGTGGACGTTGTCGGTG  
GCTATGGCGTTCCCGCCAGTGCTAGACGTAGGGACGTACTCTTTCATACG  
GGAGGAGGACCAGTGCACCTTCCAGCACCGCTCTTTCAGGGCCAACGATT  
CGCTAGGCTTCATGCTCCTGCTGGCGCTCATCCTCCTGGCCACGCAGCTG  
GTTTACCTCAAGCTCATCTTCTTCGTCCACGACCGCAGGAAGATGAAGCC  
TGTCCAGTTTGTGCTGCGTCAGCCAGAAGTGGACCTTCCACGGACCGG  
GGGCCAGCGGCCAGCGGGCGCCAACCTGGCTGGCCGTTTTTCGGTCGAGGC  
CCCACCCCGCTACCTTGCTAGGAATCCGTGAGAACAGCAACGCAGCGGG  
CCGCAGGCGTCTACTGGTGTGGATGAGTTCAAACAGAGAAGAGGATTA  
GTAGGATGTTTACATCATGACGTTTTTCTTCTGCCCCTCTGGGGGCC  
TATCTGGTGCCTGCTACTGGCGGGTGTGTTGCCAGGGGCCCTGTGGTCCC  
GGGAGGCTACCTGACGCGCCCGTGTGGATGAGCTTCGCCCAGGCTGGGG  
TCAATCCGTTTCATCTGCATCTTCTTAACNNNNNNNGCCAAATCTCGCTTTCACCCCT  
GGCATGGGGACTGGTCTGGCACGGAGC---GCAGCGTCCCCTCTGCAA  
CAGCTTGCTATCCCCGCAGCAAAGCGAGGAGCCACTGTTGCCACCCCCC  
CGCAGCGATGGTTTGTACCC---CTGCCAACAACCGACTGGACTTTGCA  
GCCTCAACCTACGACGCCGCC-----GATTCGCCCGGTAACGCCGC  
CACCTTGCTGTCTTACGCTGCGGCAGGAGTGAAGGCTC-----TCCCGC  
TGCCGACCGCAGGCTGCTCCAACCGGCTCTCGGTTATTACGCAGACCCG  
TCGG---GATGG---GGAGGACGCACGCCGCCGAGTACTGCGGCATGAA  
CAGCAAATCCAGCTCGGTGTTTTCTGCTGGCCCCCTAACTCTATCGGAA  
GCCGAGCTGCAA---GC---AACTACCTGG-----CCGAGGA---G  
GGA---GAGTC---CATCCCCGCAGAGAGGTCACCG---AT---CGGCGG  
CTCAGAGGAG---ACCAAACCCAAAGACTTAAC---GTCAGA---GTCGA  
GCTGGATAGAG---ACGCCCTCCTCCATCAAATCCATCGATTCCAGCGAT  
TCTGGGATCTTTG---AACAGGCCAAAAGGAGAAGGATCTCACCTTCCGC  
CACGCCG-----GTGTCAGAGACAGTGTCCCCGTTAAAATCGGAGC  
ATCACTCAACAGGCGAAGTACAGAGCGAGAAGTGGCGCTGGGGATAAAT  
CCGTTTCGCGGATGGGATGGGCGCCTTCAAATAAACCACAGCTCCCACGA  
TATTGGCTCCGG---ACAGACGGCGTTTTCTCCACAGGCT---CCCGGCT  
AC---GCAGCAGCCGCTTGGGG---CACCATCA-----CCACCCGACC  
CACGTTGGCTCT---TACTCCACCGCTGCTTTCAACTCCACCAGGACTT

TCTCTTCAGAAATCGAGGATTCGGGGATGCCGGCGG-----CG  
CGCAGCACAGTTTGTTCGCCTC-----CGGAAGTTT---C-----  
GCAGGGCCACATGGACTCAGATGCAGCGGGGCACCTGCTCTTCCCGGG  
GCTCCACGAG---CAAGCGGCGACCCACGCGTCTTCCAATGTGGTCAACA  
GCCAGATGCGGCTGGGTTTCTCGGGGACATGTACGGACGGGCTGACCAG  
TATGGCCACGTTACGAGCCCTCGCT---CCGACCCTATGCCTCGACCCA  
GCTGCATGGCTACGGCCCTATGAACATGAATATGGCCGCA---CACCACG  
GTGCAGGGGCTTCTTCCGATACATGAGGCAGCCCATCAAACAAGAGCTC  
ATCTGCAAGTGGATCGAGCCGGAGCAGCTGTCGAACCCCAAAAAGTCGTG  
CAACAAAACCTTTTAGCACTATGCACGAGCTGGTGACCCATCTGACGGTGG  
AGCATGTTGGGGGACCGGAGCAGACCAACCACATCTGCTTCTGGGAGGAT  
TGCGCCAGAGAGGGGAAGCCATTCCAAGCCAAGTACAACTTGTAATCA  
TATCAGAGTTCACACCGGAGAGAAGCCCTTCCGTGTCNNNNNNNNNNNNNNNNNNNN

>Lota lota

AGCCTGCTCATTTCGAGCAGAGCTAAGTCAACCCGGCGCACTCCTTGGTGA  
CGATCAGATTTATAATGTAATCGTCACAGCACACGCTTTCGTAATAATTT  
TCTTTATAGTAATACTACTAATAATTGGAGGCTTCGGAACTGACTAGTC  
CCCCAATGATCGGCGCCCCGATATAGCCTTTCCTCGTATGAACAACAT  
GAGCTTCTGACTTCTTCCCTCCATCATTCCTTGCTCCTCCTAGCATCCTCTG  
GGGTAGAAGCCGGAGCCGGAACAGGTTGAACTGTATACCCTCCTCTAGCA  
GGCAATCTTGCTCATGCTGGGGCTTCTGTTGACCTTACTATTTTCTCCCT  
GCATTTAGCAGGGTCTCATCAATTCCTGGAGCAATTAATTTTATTACCA  
CCATCATCAACATGAAACCCCGCAATCTCACAATATCAAACACCGCTA  
TTTGTCTGAGCAGTCCTAATTACAGCCGTCTACTACTCCTGTCTCTCCC  
CGTTTTAGCCGCTGGTATTACGATACTGCTGACTGATCGAAATCTTAATA  
CTTCTTCTTTGACCCCGCTGGAGGAGGGGACCCAATTCTGTATCAGCAC  
TTA-----  
-----  
-----  
-----

-----TTCTGGAGAGGAACCTCCACCCGACCAACTGCCTGGG  
CATGCTGCTGCTGTCCGACGCCACCAGTGCCTCAAGCTCTCGGAGCTGT  
CCTGGAGCATGTGCTGAGCAACTTCCCTGCCATATGCAAGACGGAGGAT  
TTTCTCCAACCTGCCCAAAGACATGGTTGTGCAGCTCTTGTCCCACGAGGA  
GCTGGAGACGGAGGACGAGAAGCTTGTCTACGAGGCCGCGCTGAACTGGG  
TCACCTATGACCTGCGAGGGAGGCACCCCACTTGCCGGAGCTGCTGAAA  
ACGGTGCCTCTGGCCCTTCTGCCCGCCGTCTTCCCTCATGGAAAATGTCTC  
CACCGAAGAGCTGATCAACAGCCAGGCCAAGAGCAAGGAGCTGGTGGACG  
AGGCCATCTGCTGCAAGCTGAAGATCCTGCAGAACGACGGCGTGGTCAAC  
AGCCCGTGTGCCCGTCCAGGAAGACCAGCCACGCRCTCTTCCCTGCTGGG  
CGGCCAGACCTTCATGTGCGACAAGCTGTACCTGGTGGACCAGAAAGCCA  
AAGAGATCATCCCCAAGGCCGACATCCCCAGCCCCAGGAAGGAGTTCAGC  
GCCTGCGCCATCGGCTGCAGGGTGTACATCACGGGCGGGC--GGGGCTC-  
GGAGAACGGCGTGTCCAAGGACGTGTGGGTGTACGACACGGTGCAGGAGG  
AGTGGTCCAAGGCGGCGCCCATGCTCATCGCCCGCTTCGGCCACGGCTCC  
GCGGAGCTGAAGCACTGCCTGTACGTGGTGGGCGGGCACACGGCCGCCAC  
GGGCTGCCTCCCGGCGTNCCTCCGGAGGATTACATTGTGGTCTTCTCTC  
GTTCCACAACGAGGTTGATCCTAAATGAAGCAGAGCTGATCATGGCACTG  
GCCAGGAGTTTACAGATGAGAGTCTTTACGGTGTCCCTGGAGGAGCAGTC  
TTTCGCCAGCATAGTGCAGGTGATCAGCGGAGCCTCCATGCTGTTTCAGTA  
TGCATGGCGCTCAGCTCGTCACGTCATTGTTTCTGCCAGAGGGGCAGCT  
GTGGTGGAGCTGTTCCCTATGCGGTTAACCAGAGCAGTACACCCCGTA  
TAAAACCTAGCTCCCTGCCGGGCATGGACCTCCAGTATGTCTCCTGGA









-----TCT  
CCTGGAGCATGTGCCCTGAGCAACTTCCCTGCCATTTGCAAGACAGAGGAC  
TTCTCCAAGTCCCAAAGACATGGTCGTGCAGCTTTTGTCCCCTAGGA  
GCTGGAGACGGAAGACGAGAACTGGTTTACGAGGCCGTGCTGAACTGGG  
TCACCTACGACCTGCCGGGGAGGCACGCCCACTTGCCAGAGCTCCTGAAA  
ACGGTGCGCCTGGCTCTCCTGCCCGCCATTTTCTCATGGAGAACGTCTC  
CATGGAGGAGCTGATCAATGCGCAGACCAAGAGCAAGGAGCTGGTGGACG  
AGGCCATCTGCTGCAAGCTGAAGATCCTGCATAACGACGGCGTGGTGCAC  
AGCCCTTTGGCCCGTCCCAGGAAGACCAGCCACGCGCTCTTCTGCTTGG  
CGGGCAGACCTTCATGTGCGACTATTTTTTTCTGGTGGACCAGAAAGCCA  
AAGAGATCATCCCCAAGGCCGACATCCCCAGCCCCGCAAGGAGTTCAGC  
GCCTGCGCCATCGGCTGCAAGGTGTACATCACCGGGCGGCCGGGGGCTCG  
GGAGAACGGCGTGTCCAAGGACGTGTGGGTGTACGACACCGTGAAGAGG  
AGTGGTTCAGGGCGGCGCCCATGCTCATCGCCCGCTTCGGCCACGGCTCC  
AC-----

-----GGAGGATTACATTGTGGTCTTCTCT  
CGCTCCACAACGAGGTTGATCCTAAATGAAGCGGAGCTGATCATGGCGCT  
GGCCAGGAGTTTCAGATGCGAGTCTTGACGGTGTCCCTGGAGGAGCAGT  
CTTTTGCCAGCATCGTGCAGGTGATCAGCGGAGCAACCATGCTGTTTCACT  
ATGCACGGCGCTCAGCTCGTACGGCGTTGTTTCTGCCAGAGGTGCAGC  
CGTGGTGGAGCTGTTCCCTATGCCGTGAACCCGGAGCAGTACACCCCGT  
ATAAAACCCTCGCTCCCTGCCGGGAATGGACCTCCAGTACATCTCCTGG  
AGGAACACAATGGAGGAGAACACCGTCACTCACCCGGACCGACCCCTGGGA  
CCAAGGGGTGTGCTGCACTTGGAGAAGGAGGAACAAGAGCGCATACTAG  
CCAGCAAGGACGTCCCAGGCACCTATGCTGCCGTAAACCCAGAGTGGCTT  
TTCAGAATCTACCAGGACACTTTGGTGGACATCCCTTCACTCCTCGAGGT  
GCTCAA---GGAGGGCCTCAA---ACCAGGCCCAACTTGAAAA---GA  
GCAAGGCRGCCAGCACAGTTACCCGGGGAGGGTCCGAGAACCCCAAGTGC  
CAGACCTCGGTCCAAGCCACCAATGAGGCCAAACTCACAGTGTCTGGCA  
GATCCCGTGGAACTGAAGTTTCTGAAGGTGAGAGAGGTGAAGTACGA--  
-----AAGAAGGATGCCAGCAAAGGAACCCCTGGAGGATCAAATC  
ATCCAGGCCAACCCCTGCCCTGGAGGCCTTCGGTAATGCCAAAACCCCTGAG  
AAATGACAACCTCCTCCCGTTTTGGAAAGTTCATCCGGATTCACTTTGGGA  
ACAGTGGCAAGCTTAGCTCAGCGGACATTGAGACCTACCTGCTAGAGAAG  
TCCAGAGTCACTTTCCAGCTCAAGTCAGAGAGGAACATCACATATTCTT  
CCAGATCTTGTCCAATCAGAAGCCAGAGCTGCTGGACATGCTGCTGATAA  
CCAACAACCCATACGATTACTCCTACATCTCTCAAGGAGAAGTAACTGTG  
GCCTCCATCAATGACTCTGAGGAGCTCATGGCCACTGACAGTGCATTTGA  
CGTCTTGGCTTACCCCTGGAAGAGAAGATGGGAGTGTACAAGCTCACGG  
GTGCCATCATGCACTATGGCAACATGAGGTTCAAGCAGAAGCAGCGTGAG  
GAGCAGGCAGAGTCAGACGGGACTGAAGCTGCTGATAAATCAGCGTACCT  
CATGGGTTTGAACCTGTCAGACCTCATCAAAGGCCCTTGCCACCCAGGG  
TGAAGGTAGGAAATGAATATGTCACCAAAGGTCAAGGGGTGGACCAAGTC  
TACTAC-----

-----  
-----  
-----  
-----  
-----  
-----  
-----  
-----  
-----  
-----



AGCACTTCCTCATGTGCGCCGACGACAAGCAGTGGAAGCTGGGCAAGCGG  
CGGGCGGAGAAGGACGAGATGGTGGGCGCCCACTTCATGCTCACCTTCCA  
GATCCCCAACGAGCACCAGGACCTGCAGGATGTGGAGGAGCGCGTGGACT  
CCTTCAAGGCCTTCACCAAGAAGATGGACGACAGCGTCATGCAGCTGACG  
CACGGCGCCTCGGAGATGGTGCGCCGGCACCTGGGAGAGTTCCGCAAGGA  
GTTCCACCGGCTGGGCGGTGCCTTCCAGTCGCTGTCGCAGGCCTTCATGC  
TGGAGCCGCCGACAGCTCGGAGCCACTCAACAACGCCATCTCGCAT---

-----GCCAAATCTCGCTTTC  
ACCCCTGGCATGGGGACTGGTCTGGCACGGAGC---GCAGCGTCCCACTC  
GGCAACAGCTTGCTATCCCCGCAGCAAAGCGAGGAGCCCACTGTTGCCAC  
CCCCCGCAGCGATGGTTTTGTCACCC---CTGCCAACAACCGACTGGACT  
TTGCAGCCTCGGCTTACGACGCCGCC-----GATTTCCGCCGTAAC  
GCCGCCACCTTGCTGCTTTACGCGCGGCAGGAGTGAAGGCTC-----T  
CCCCCTGCCGACTGCAGGCTGCTCCAACCGGCCTCTCGGCTATTACGCAG  
ACCCGTCGG---GCTGG---GGAGGACGCACGCCCGCCGAGTATTGCGGG  
GTGAACAGCAAATCCAGCTCGGTGTTTTCTGCTGGCCCCCTAACTCTAT  
CGGAAGCCGGGCTGCCA---CC---AACTACCTGG-----CCGAGG  
A---GGGA---GACTC---GATCCCCGCAGAGAGGTCACCG---AT---C  
GGCGGCTCCGAGGAG---ACCAAACCCAAAGACTTAAC---GTCAGA---  
GTCGGGCTGGATAGAG---ACGCCGTCCTCCATCAAATCTATTGATTCCA  
GCGATTCTGGGATCTTTG---AACAGGCCAAAAGGAGACGGATCTCACCT  
TCTGCCACACCA-----GTGTCAGAGACAGTGTCTCCGTTAAAATC  
TGAG---TCACCCAACAGGGGAGGTCACGGACAGAGAAGTCGCGTTGGGGA  
TCAACCCGCTCGCGGACGGGATGGGCGCCTTCAAAATCAACCACAGCTCC  
CACGACATCGGCTCCGG---TCAAACGGCGTTTTCTCCAGGGC---CC  
CGGCTACGCGGCGGCGGCCGCCCTCGGA---CACCACCACATCCCCACC  
CCACGCACGTGAGCTCT---TACTCCACCGCCGCTTCAACTCCACACGG  
GACTTTCTTTTCAGAARTCGGGGTTTCGGAGACGCCACCG-----  
---CGCGCAGCACAGCTTGTTCGCCTCCGC---CGCGGGAAGTTT---C-  
-----GCGGGGCCACACGGACACTCCGAGGCCACGGGGCACCTGCTCTTC  
CCGGGGCTCCACGAG---CAGGCGGCCAGCCACGCGTCCTCCAATGTGGT  
CAACGGCCAGATGCGACTGGGCTTTTCCGGAGACATGTACGGAAGGGCCG  
ACCAGTACGGGCACGTAACGAGCCCGAGGT---CCGACCACTACGCGTCG  
ACCCAGTTGCACGGCTACGGCCCCATGAACATGAATATGGCCGCGGCTCA

CCACGGGGCCGGGGCCTTCTTTTCGGTACATGCGGCAGCCGATCAAACAGG  
AGCTGATCTGCAAGTGGATCGAGCCGGAGCAGCTGTCCAATCCCAAAAAG  
TCGTGCAACAAAACCTTTCAGCACGATGCACGAGCTGGTGACCCACCTGAC  
GGTGGAGCACGTGGGGGGGCCCCGAGCAGTCGAACCACATCTGCTTCTGGG  
AAGAGTGTTCACGGGAAGGGAAGCCGTTCAAGGCTAAATACAAAACCTGTG  
AACCACATCAGGGTTCACACCGGA-AGAAACCGTCCCATGTCC-----  
-----

>Luvarus imperialis

AGTCTGCTCATCCGGGCAGAGCTCAGCCAACCAGGCGCCCTCCTCGGGGA  
CGACCAAATTTACAATGTTATCGTTACGGCGCACGCATTCGTTATGATTT  
TCTTTATAGTAATGCCAATTATGATTGGAGGGTTTCGGAAACTGACTGATC  
CCCCTCATGATCGGAGCCCCGACATAGCATTCCCCCGAATAAAACAACAT  
GAGCTTTTGACTCCTCCCTCCCTCTTTCCTTCTCCTTCTTGCCCTCCTCTG  
GAGTAGAAGCTGGTGCCGGCACCAGGATGAACTGTCTACCCCCATTAGCT  
GGAAACCTCGCACATGCGGGAGCATCCGTAGACCTGACCATTTTCTCCCT  
GCACCTAGCAGGTATTTCCCTCAATCCTGGGGGCCATTAACCTCATTACAA  
CTATCATCAACATGAAACCTCCCGCTATTTCCCAATACCAAACCCCTCTT  
TTCGTATGGGCTGTTCTAATTAAGTGTCTGCTCCTCCTCCTCACTTCC  
AGTCCCTGCTGCTGGAATCACAATGCTCTTAACAGATCGAAACCTCAACA  
CCACCTTCTTCGACCCCGCGGGCGGAGGGGACCCCATTTCTTTACCAACAC  
CTGTTCTGATTCTTCGGCCA-----  
-----  
-----  
-----

-----NNNCTAGAGAGAAACCTTCACCCATCTAACTGCCTTGGCAT  
GCTGTTGCTGTCTGATGCCACCAGTGTATCAAGCTGTCAGAGCTCTCCT  
GGGGCATGTGCCTCAGCAACTTTCCCGCTATTTGCAAGACAGAGGACTTC  
CTCCAGCTGCCCAAAGATATGGTGGTGCAGCTTTTGTACATGAGGAGCT  
AGAAACAGAAGAYGAGAGACTGGTTTATGAAGCTGCCCTCAATTGGATCA  
ACTATGACCTGGAAAAGAGACACTGCCACCTACCAGAGCTCCTGAGAACA  
GTCCGTCTGGCCCTGCTGCCTGCCATCTTTCTCATGGAGAACGTTTCTAC  
AGAAGAGCTGATCAACGCCACAGGCCAAGAGCAAGGAGCTGGTGGATGAAG  
CTATCCGCTGTAAGCTGAAGATCCTGCAGAATGATGGCGTTGTTAACAGC  
CCATGTGCTCGACCAAGAAAACCAGCCATGCTCTCTTTCTTCTGGGAGG  
GCAGACTTTCATGTGTGACAAGTTGTACCTGGTGGACCAGAAAAGCCAAAG  
AGATCATCCCCAAGGCTGACATTCCCAGCCCCAGGAAGGAGTTCAGCGCC  
TGTGCCATTGGCTGTAAGGTGTACATCACTGGTGGAA--GAGGCTC-AGA  
GAATGGCGTGTCCAAAGATGTATGGGTCTACGACACCGTCCACGAGGAAT  
GGTCGAAGGCGGCACCCATGCTCATTGCCAGGTTTGGCCATGGCTCTGCG  
GAGCTGAAACACTGCCTCTACGTGGTAGGAGGTCACACAGCTGCAACTGG  
TTGCCTCCCGGCCCTCTCCGTCTGGATGAATACATTGTTGTGTTTAGTCGT  
TCAACAACGAGGCTGATACTGAATGAAGCAGAGTTAATCATGGTGTGCGC  
CCAGGAGTTCAGATGAGAGTGGTCACAGTATCCCTGGAGGAACAGTCTT  
TCCCCAGTATCGTCCAGGTGATCAGCGGTGCTACCATGTTAGTCAGTATG  
CATGGAGCTCAGCTTATTACCTCACTCTTCCCTCCCCAGAGGAGCTGTTGT  
GGTGGAGCTGTTCCCTTTGCTGTGAACCCAGAGCAGTACACTCCATATA  
AAACCTTGCCCTCCCTTCCAGGCATGGACCTTCACTATGTCTCCTGGAGG  
AACACCAAGGAGGAGAACACCATCACCCACCCAGACAGACACTGGGAACA  
GGGGGGCATCGCTCACTTGGAGAAGGAGGAGCAAGAGCGAATACTGGCAA  
GCAAAGATGTCCCCAGGCACCTGTGCTGCCGCAACCCAGAATGGCTTTTT  
CGGATCTACCAGGACACTTTGGTGGACATCCCTCCTTTCTGGAAGTCCT  
CAA---AGAGGGCATGAAG---ACAAAGCCCAGCTTGAAGAA---GTCAA  
AGTTGGCCAGCACTGTCCACCCAGGCCGTGTCAGAGAACCCAGTGTGTCAG









TACAGAAGAGCTGATCAACGCCCAAGCCAAGAGCAAGGAACTGGTGGATG  
AAGCTATCCGGTGTAAAGCTGAAGATCCTGCAGAACGATGGCGTTGTTAAC  
AGCCCGTGTGCTCGACCAAGAAAAACCAGCCATGCCCTCTTTCTCTGGG  
AGGACAGACTTTCATGTGTGACAAGTTGTATTTGGTGGACCAGAAAGCCA  
AAGAGATCATCCCCAAGGCTGACATTTCCAGCCCCAGGAAAGAGTTCAGC  
GCCTGCGCCATCGGCTGTAAAGTGTACATCACTGGTGGGA--GAGGCTC-  
AGAGAAATGGTGTGTCCAAAGATGTATGGGTCTATGACACCGTCCATGAGG  
AATGGTGAAGGCGGCACCCATGCTCATTGCCAGGTTTGGCCATGGCTCT  
GCTGAGCTGAAACACTGCCTCTACGTGGTAGGAGGTCACACCGCAGCGAC  
TGGCTGCCTCCCGCCTCTCCGTCTGGATGAATACATTGTTGTGTTTAGT  
CGTTCATCAACGAGGCTGATACTGAATGAAGCAGAGCTAATCATGGCGCT  
GGCCAGGAGTTCCAGATGAGAGTGGTCACGGTATCCCTAGAGGAAACAGT  
CCTTCCCCAGTATCGTTCAGGTGATCAGCGGTGCTTCCATGTTAGTCAGT  
ATGCATGGAGCTCAGCTTATCACCTCACTCTTCCCTCCCCAGAGGAGCTGC  
TGTGGTGGAGCTGTTCCCTTTTGTGTTAAACCCAGAGCAGTACACCCCAT  
ATAAAAACCTTGCCTCGCTTCCAGGCATGGACCTTCACTATGTCTCCTGG  
AGGAACACTAAGGAGGAGAACACCATCACCCACCCAGACAGACCCCTGGGA  
ACAAGGGGGCATTTGTTCACTTGGAGAAGGAGGAGCAAGAGCGAATACTGG  
CAAGCAAAGATGTCCCCAGGCACCTTGTGCTGCCGCAACCCAGAGTGGCTC  
TTCCGGATCTACCAGGACACTTTGGTGGACATCCCTTCCCTTCCCTGGAAGT  
GCTCAA---AGAGGGCATGAAG---ACAAAGCCCAGCCTGAAGAA---GT  
CAAAGCCGGCCAGCACAGTCCACCCGGGTCGGGTCAGAGAACCCAGTGT  
CAGACCTCAGTACAAACCACTAATGAGGCTAAACTCACAGTCTCCTGGCA  
GATCCCCTGGAATCTGAAATACCTAAAGGTGAGAGAGGTGAAGTACGAAG  
TGTGGATCCAGAAAAAGACACCAGCAAAGGGACACTGGAGGATCAAATC  
ATCCAGGCAAACCCCTGCCCTGGAGGCCTTCGGTAACGCCAAAACGCTGAG  
AAACGACAACCTCGTCTCGTTTTGGTAAATTCATCCGAATTCACTTCGGTA  
CGAGCGGTAAGCTGTCTCTGCTGACATTGAGACGTACCTGCTGGAGAAG  
TCACGTGTCACCTTTCAGCTCAAGGCTGAGAGGAACTACCACATATTCTA  
CCAGATCCTGTCCAATCAGAAGCCAGAGCTGCTGGACCTGCTGCTGATCA  
CCAACAACCCGTACGACTACTCCTACATCTCCAAGGAGAGGTAACAGTC  
GCCTCCATTAATGACTCGGAGGAGCTGATGGCCACCGACAGTGCCTTTGA  
TGTGCTTGGCTTCACTCCAGAAGAGAAGATGGGTGTCTATAAACTGACTG  
GCGCCATCATGCACATATGGCAACATGAAGTTCAAACAGAAGCAGCGGGAG  
GAGCAGGCTGAGCCGGATGGGACGGAGGCTGCTGATAAATCAGCTTACCT  
AATGGGGCTGAACTCTGCTGACCTCATCAAAGGGCTGTGCCATCCCAGAG  
TCAAAGTAGGAAATGAATACGTACCAAAGGACAAAATGTGGACCAAGTC  
TACTACCCCAACAAGGAGGCCTTCAAGTGTGAGGAGTGTGGGAAGCACTA  
CAACACCAAGCTGGGATATAAGCGCCATGTGGCCATGCACTCTGCCACAG  
CAGGGGATCTCACCTGTAAAGTGTGCATGCAGACCTTCGAGAGCACACCC  
GTACTCTTGGAGCACCTCAAGAGCCACTCCGGGAAGTCTTCGGGTGGCGC  
CAAGGAGAAAAAACACCCGTGCGACCACTGTGACCGTTGTTTCTACACAC  
GGAAGGATGTGAGACGGCACATGGTGGTCCACACGGGCCGAAAGGACTTC  
CTGTGCCAGTACTGTGCCAGCGCTTCGGCAGGAAGGACCATCTGACACG  
CCACGTGAAGAAGAGCCACTCACAGGAGCTGCTGAAGATCAAGACGGAGC  
CTCCTGATATGTTAGGTCTTTTAGCTTCGGGGTCACCGCCTTGCTCTGTG  
AAGGAGGAGCTCAGCCCCATGATGTGTGGAATGGGTCCCAACAAAGACCC  
CATGATGGGCAAACCATTTCCCAGTGGTGGCCCTTTTCCGATGGGCATGT  
ACAACCCCAACCAT-----CTCCAGGCGATGTCTAATTCTGGGGTGGGT  
CACCCA-----CACCCGTCCCTGATGCCAGTTCCCTTGTCTGCAGCTAT  
GGGCATGAGCTGTACATGGAATATCTCATCTACGCCTCTTTCTCATTTA  
TGGGATGTTTACAAAATCAGTGATGGATCAAATATCGTGAACCTGCTGGCT  
AGTAACTCTCCGAGTGTTCGTATGCTCTGACCCAGCAGAAATACTTCAG

TAACTACAGCCCCGTGATTGGGTTTTACATTTACGAGCCCATCGAGTACT  
GGAACTCCACGGTGCAGGAGCACCTGAAGACTCTGAGTCATGGCTTCAAC  
AAGATCTCCTGGATGGACAACCTTTTCCACTACCTGCGGGTGGTGAATGT  
GAGTACGTCAACCAAGAGCGACTTCATCACCATCCTCAAGGGCTCCTTCC  
TGCGCAGCCCGGAGTACCAGCACTTCACTGAGGACATCATATTCTCCAAG  
A---ACCGTGAGACTG-----ATGAGTACGACATTATCGCCTCACGGAT  
GTACTTGGTGGCACGGACGACAGAGAAGAAGCGGAAGAGGTGGTGGAGC  
TTCTGGAAAAGCTTCGTCCGTTGATGCTAATCAACAGCATCAAGTTCATT  
GCCTTCAATCCTACATTTGTGTTTATGGACCGCTACAGTTCCTCTGTCAT  
CTCGCCATCCTGACCTCAGGCTTCAGCGTACTCACAATCCTCATCCTCA  
CTTTCTTCTGGTTCATCAACCCCTTGGGAACTTCTGGCTCATCCTCACR  
GTAACGTCCGTGGAGCTGGGCGTCTTGGGTTTTGATGNNNNNNNNNNNNNNNNNNNNGCAGCCCGCTCTCA  
AGAATGTGTCTACATCTTACAATGTTGGCATTATTAATGGGCTCTCTGGA  
TGGGCTTCTCGGTGGATGACGCTCCAGCTGACACCATCACTCGGCGGTT  
TCGCTATGATGTGGCACTGGTGTGAGCATTAAAGGATCTGGAGGAGGACA  
TCATGGAGGGGCTGAGAGAGAGTGGGATGGAAGACAGTGCTTGCACCTCA  
GGCTTCAGTGTGATGATCAAGGAATCTTGTGATGGCATGGGCGATGTCAG  
CGAGAAGCATGGTGGAGGACCAGTTGTTCCCGAGAAGGCTGTACGTTTCT  
CTTTCACTGTTATGTCTGTCTCTGTCCTGGCAGACGATGAGGAG-----  
-----GAAGAGGTTACCATCTTCACTGAGCC  
AAAGCCAAACTCAGAACTGTCTGTAAAGCCCTTTCCTGACATTTGTGG  
ATGAGTCAGACCATGAGACACTCACAGCTGTCTGAGCCCTATAGTTACA  
GAGCGTAATGCAATGAAAGACAGCAGGCTCATCCTATCCATGGGTGGACT  
ACCTCGTTTCCCTCCGCTTCCACTTCAGAGGCACAGGATACGATGAGAAGA  
TGGTGCCTGAGATGGAGGGCCTCGAGGCCTCAGGCTCCACCTATATCTGC  
ACTCTTTGCGACTCCAGTCGGGCAGAGGCCTCTCAAACATGGTGTCTACA  
CTCTGTACCCCGCAGTCATGAAGAGAACCTTGAACGTTACGAGATATGGA  
GAACCAACCCCTTTTCTGAGTCTGTAGATGAGCTGCGAGACAGAGTCAA  
GGTGTCTCTGCCAAGCCCTTCATGGAGACCAGCCACACTGGATGCATT  
ACACTGTGACATTGGAAATGCCACTGAGTTCTACAAAATCTTCCAGGACG  
AGATCGGGGAGGTGTACAAAAGGT---CAAC---CCCAGCCGGGAGGAA  
CGGCGCAGCTGGAGGGCAGCCCTAGATAAACAGCTGAGGAAGAAGATGAA  
GCTTAAACCGGTGATGAGGATGAATGGGAACATGCCCCAGGCTAATGA  
CCCAGGAGGCTGTGGAGGTGGTGTGTGAGCTGGTGCCCTCAGAGGAGAGG  
AGGGAGGCGCTGAGGGAGCTTATAAGGCTCTACCTCCAGATGAAGCCTGT  
GTGGCGGCCACCTGCCAGCGAAGGAGTGCCCCGACCAGCTGTGCCGCT  
ACAGCTTTAACTCCCAGAGCTTTGCCGACCTCCTCTCCTCTACCTTCAA  
TATAGGTACAATGGAAAGATAACCAATTACCTGCACAAGACCCTGGCCCA  
TGTGCCGTAAATCATAGAGAGAGATGGATCCATAGGAGCCTGGNNNNNNNNNNNNNNNNNNNNNNNNNN  
NNNTCGTACA  
CCATCGATATGGGTCCTTTGGGGCCCCGGTGGAAAGGAGAGCCCACAGCCT  
TTCTCCTGCTCCATTGAAGACCCCACAAAACAGACAAAGTTCAAGGGCAT  
CAAGACGTACATTTTCGTACCGGGTACGCCGAGCCACACAGCTCATCCTG  
TCTACAGGCGCTACAAACACTTTGACTGGCTGTACAACCGCTTACTGCAC  
AAGTTCACTGTGATCTCCGTGCCTCACCTGCCTGAGAAGCAGGCCACGGG  
GCGATTTGAGGAAGACTTCATCGAGAAGCGAAAGAGACGACTGATACTGT  
GGATGAACCACATGACCAGTCAACCAGTCTCTCCAATATGAAGGCTTT  
GAGCACTTCTGATGTGTGCTGATGACAAGCAGTGGAAACTGGGCAAGAG  
ACGGGCAGAGAAGGACGAGATGGTGGGTGCCCATTTTCATGCTGACCCTCC  
AGATCCCTAACGAGCACCAGGACCTTCAGGATGTAGAGGAGCGGATGAC  
ACCTTCAAGGCATTTGCTAAGAAAAATGGATGATAGCGTGATGCAGCTCAC  
ACATGTTGCCTCAGAGCTGGTGCCTAAGCACCTGGGTGGGTTTCAAGGAGG  
AGTTCAGCGGCTGGGAAATGCCTTCCAGTGCATCAGCCAGGCGTTCATG

CTGGACCCTCCCCACAGCTCAGAGACCTTCAACAACGCCGTCTCCCATNNNNNNNNNNNNNTT  
CCTCAAACCTGACCTCTCTGGGTTTCATCATTGGAGTCGGTGTGGTTGGAA  
ACCTCCTGATCTCCATCCTGCTGGTCAAAGACAAGAGCCTGCACCGAGCG  
CCCTACTACTTCCCTGCTGGACCTGTGCGCCTCTGATATCCTGCGCTCTGC  
CATCTGCTTCCCCTTTGTCTTACCTCGGTCAAGAATGGATCTGCCCTGGA  
CCTATGGCACGCTGACCTGCAAAGTGATTGCCTTCTGGGTGTGCTGTCC  
TGTTTCCACACGGCGTTTATGCTGTTCTGTGTGTCAGTGTACACGCTACCT  
GGCCATCGCACATCACCGTTTCTACACCAAGAGGCTGACCTTCTGGACCT  
GTCTAGCTGTGATCTGCATGGTGTGGACATTGTGTCAGTGGCTATGGCGTTC  
CCGCCGGTGTAGACGTAGGGACGTACTCTTTTATCCGGGAGGAGGACCA  
GTGCACATTCCAGCACCGTTCCTTACAGGGCGAATGATTCGCTGGGCTTCA  
TGCTCCTGCTGGCACTCATCCTCCTGGCCACACAGCTGGTTTACCTCAAG  
CTCATCTTCTTCGTCACGACCGTCGAAAGATGAAGCCTGTCCAGTTTGT  
GCCTGCTGTGACCCAGAACTGGACCTTCCACGGGCCCGGCGCCAGCGGGC  
AGGCGGCGGCCAACTGGTTGGCCGGATTTGGTTCGAGGCCCCACCCCGCCT  
ACTTTGCTGGGCATCCGGCAGAACAGCAACGCAGCGGGCCGACGGCGTCT  
ACTGGTATTGGATGAATTCAAACAGAGAAGAGGATTAGTAGGATGTTCT  
ACATCATGACGTTTTTCTTCCCTGGCGCTGTGGGGGCCCTATCTGGTCCCC  
TGCTACTGGCGGGTGTGTTGCAAGGGGCCCTGTGGTCCCTGGGGGCTACCT  
GACGGCAGCCGTGTGGATGAGCTTTGCCAGGCTGGGGTCAATCCTTTCA  
TCTNNNNNNNNNNNNNNNNNNNNNGCCAAATCTCGCTTTCACCCCTGGCATGGGGACTGGTCCTGGCACGGA  
GC---GCAGCGTCCCACCTCGGCAACAGCTTGCTATCCCCGAGCAAACCG  
AGGAGCCCACTGTTGCCACCCCCCGCAGCGATGGTTTGTCAACC---CT  
GCCAACAACCGACTGGACTTTGCTGCCTCGGCATACGACGCCGCT-----  
----GATTTGCGCCGTAACGCGGCCACCTTGCTGTCTTACGCAGCGGCCG  
GAGTGAAGCTC-----TTCCCTGCCGACTGCAGGCTGCTCCAACCGG  
CCTCTTGGCTATTACGCAGACCCGTCAG---GCTGG---GGAGGACGCAC  
GCCGCCGAGTACTGTGGCGTAAATAGCAAATCCAGCTCGGTCTTTTCCT  
GCTGGCCCGCTAACTCTATCGGTGGAAGAGCGGGCA---CC---AACTAC  
CTGG-----CTGAGGA---GGGA---GACTC---CATCCCGACAGA  
GAGGTCACCG---AT---CGGCGGCTCGGATGAG---ACCAAACCCAAAG  
ACATGAC---ATCAGA---GTCGAGCTGGATAGAG---ACGCCGTCCTCC  
ATTAAGTCCATTGATTCAAGCGATTCTGGTATCTTTG---AACAGGCCAA  
AAGGAGAAGAATCTCACCTTCTGCCACGCCG-----GTTTCAGAGA  
CAGTGTCCCCTTTAAATCTGAGCATCACTCAACAGGCGAAGTACAGAG  
AGAGAAGTGGCGTTGGGGATAAATCCGTTTCGCGGATGGGATGGGCGCCTT  
CAAAATAAACACAGCTCCCACGATATTGGCTCCGG---ACAAACGGCGT  
TTTCTCCAGGCG---CCGGCTAC---GCAGCAGCAGCCCTGGGA---  
CACCATCA-----CCACCAACCCATGTTGGCTCT---TACTCCACGGC  
GGCTTTCAACTCCACAGGGACTTCTCTTTCAGAAATCGGGGTTTGGGG  
ACGCCACCGG-----GGCGCAGCACAGTTTGTTCGCCTC----  
-----CGGAAGTTT---C-----GCAGGGCCACATGGACTCAGATGC  
AGCGGGGCACCTGCTCTTCCAGGGCTCCACGAG---CAAGCGGCGAGCC  
ATGCGTCTTCCAACGTGGTCAACAGTCAAGTGCAGTGCAGGCTGGGCTTCTCGGG  
GACATGTACGGACGGGCCGACAGTACGGCCACGTTACAAGCCCAGCGT-  
--CCGACCACTATGCTTCGACCCAGCTGCACGGCTATGGCCCCATGAACA  
TGAATATGGCCGCA---CACCATGGTGCAGGGGCCCTTTTCGATACATG  
AGGACAGCCGATCAAACAAGAGCTCATCTGCAAGTGGGTTCGAGCCGGAGCA  
GCTGACGAATCCCAAAAAGGCGTGCAACAAAACCTTTTAGCACGATGCACG  
AGCTTGTGACCCATCTGACGGTGGAGCATGTGGGGGGACCGGAGCAGACC  
WACCACATCTGCTTCTGGGAGGAATGCGCCAGAGAAGGAAAGCCATTCAA  
AGCCAAATACAAACTTGTAATCATATCAGAGTACACACCGGAGAAAAGC  
CCTTTCGCTGTCTNNNNNNNNNNNNNNNNNNNN

>Macropinna microstoma

AGCCTGCTAATCCGGGCTGAATTAAGCCAACCCGGGGCCCTCCTAGGGGA  
CGACCAAATCTACAATGTTATCGTGACAGCACATGCTTTCGTTATAATCT  
TCTTTATAGTAATACCTGTCATAATTGGCGGCTTTGGGAACTGGTTAATC  
CCCTTGATAATCGGAGCCCCGGATATAGCATTCCCCCGCATAAAATAACAT  
AAGCTTCTGACTTCTCCCCCCTCCTTCCTTCTTCTCCTGGCCTCTTCCG  
GGGTTGAAGCCGGAGCTGGCACAGGCTGAACAGTATACCCCCCTTAGCA  
GGAAACCTTGCCCATGCAGGAGCCTCCGTAGACCTAACTATTTTTTCCCT  
CCACCTCGCCGGTATTTCCCTCAATTCCTGGCTCAATTAACCTTCAATACAA  
CTATCATCAATATAAAACCCCGGCCATCTCCCAATACCAAACCCCTCTT  
TTCGCTGAGCCCTACTTATTACTACAGTCCTTCTGCTCCTCTCACTCCC  
TGTCTTAGCTGCAGGAATCACTATACTGCTTACGGACCGAAATTTAAATA  
CTACTTCTTTGACCCCGCAGGAGGGGGTGACCCAATCCTCTACCAACAT  
CTANNNNNNNNNNNNNNNNNNNNNNNNNNNNNNNNNNNNNNNNNNNNNNNNNNNNN  
NNNNNNNNNNNNNNNNNNNNNNNNNNNNNNNNNNNNNNNNNNNNNNNNNNNNNN  
NNNNNNNNNNNNNNNNNNNNNNNNNNNNNNNNNNNNNNNNNNNNNNNNNNNNNN  
NN-----

-----GGAGGAGTACATAGTGGTGTTTCCAGCCGTTCAATT  
AGCAGGCTGATTCTTAACGAAGCAGAGCTGATTCTGGCCCTAGCACAGGA  
GTTCCAGATGAAGGTGTAAGTGTGTCTCTGGAGGAGCAGTCTTTGCCA  
GTATAGTGAAGATGGTCAGTGAGGCCTCCATGTTAGTCAGTATGCACGGA  
GCCCAACTGGTGTCTCTCTCTTCCCTGCCAGGGGGCGCAGTGGTCGA  
GCTCTTCCCCTATGCAGTGAACCCAGAGCAGTACGCTCCCTACAAAACCT  
TGGCCTCACTCCCTGGCATGGACCTGCAGTATGTGGCCTGGAGGAACATG  
ATAGAGGAGAACTCAGTGGCCTACCTGAGAGGCCTTGGGAGCAGGGAGG  
CATCGCCATTTGGAGAAGGACGAGCAAGAGCGCATCTCGGCCAGCAAAG  
AGGTACCAAGGCACCTGTGCTGCCGCAACCCAGAGTGGCTCTACCGTATC  
TACCAAGACACCATAGTGGACATCCCGTCTTTACTGGAGACACTCAG---  
AGAGACCCTGAAA---ACCCGGCCAAACCTGAAGAA---GGCCAAGCCTG  
CCAGCACGGTCCACCCGGGCGGAGTGAGGGAGCCCCAGTGCCAGACCTCG  
GTCCAGGCCACCAACGAGGCCAAGCTCACCGTGTCTGGCAGATCCCCTG  
GAACCTGAAGTACCTGAAGGTGAGGGAGGTTAAATACGAAGTGTGGATAC  
AGAAGAGGGGATCCAAGCAAGGTACCCTAGAGGATCAAATCATCCAGGCT  
AACCTGCACTGGAGGCTTTTCGGTAAAGCAAAACATTTGAGAAATGATAA  
TTCATCACGTTTTTGGCAAATTCATCCGTATTTCATTTTCGGACAAAGTGGCA  
AATTGTCCTCTGCTGACATAGAGACTTATCTGCTTGAGAAGTCACGTTGC  
ACCTTTCAGCTGAAAATCGGAGAGGAACTACCATATCTTCTTCCAGATCTT  
GTCCAATCAAAGCCAGAAGTGTGGACATGCTGTTGATCACCAACAATC



CTTCCAGGATGAGATCGGGGAGGTGTACCGCAGCCC---CAAC---CCCA  
GACGGGAGGAGCGGCGGAGCTGGAGAGCCGCTCTGGACAAGCAGCTGAGG  
AAGAAGATGAAGTTGAGGCCGGTGATGCGTATGAACGGGAACTACGCGCG  
GCGGCTGATGACCCGGGAGGCAATAGAGGTGGTGTGTGAGCTGGTGCCGT  
CAGAGGAGAGGCGAGAGGCCCTGAGGGAGCTGATGGGGCTCTACCTCCAG  
ATGAAGCCAGTGTGGCGTTCCTCCTGCCAGTCAAGGAGTGCCAGACCA  
GCTGTGTCGCTACAGCTTCAACTCCCAGCGCTTTGCAGAGCTCCTCTCCA  
CCACCTTCAAGTACAGGTATTGT-----

-----TCGTACACCATCGAGA  
TGGGCTCCAAAGGTCTCAATGGAAAGAGAGTCCCAGCCTTTCTCTTGC  
TCCATCGAAGACCCCACCAAGCAGACAAAGTTTAAAGGCATCAAGACCTA  
CATATCGTACCGGGTAACCCCCAGCCACATGGGGCGGCCTGTGTACCGGC  
GCTACAAGCACTTTGACTGGCTGTACAATCGCCTGCTGCATAAGTTTACG  
GTCATATCTGTGCCCCACCTGCCCGAGAAACAGGCCACGGGGCGCTTCGA  
GGAGGATTTTCATTGAGAAGCGTAAAAGGCGACTGGTCCTCTGGATAAACC  
ACATGACCAGCCACCCAGTCTGTCTCAGTACGAAGGCTTCGAGCACTTC  
CTGATGTGTGCCGATGACAAGCAGTGGAAGCTGGGTAAGCGGCGGGCAGA  
GAAGGACGAGATGGTGGGCGCCCATTTTCATGCTCACCTTCCAGATCCCCG  
CGGAGCACCAGACCTTTCAGGATGTGGAGGAGCGCGTGGACAACTTCAAG  
TCCTTCGCCAAGAAAATGGATGACAGTGTATGCAGCTGACGCACGTGGC  
GTCGGAACCTGGTGCAGGATCTCGGAGGATTCCGGAAGGAGTTTCAGC  
GGCTGGGGAACGCATTCAGTCCGTCAGTCAGGCATTCATGCTGGACCCT  
CCTCACAGCTCAGACGCCCTCAACAATGCCANNNNNNNN-----

-----GCCAAATCTCGCTTTCACCCTGGCGTAGGGAC  
TGGTCTTGGCACAGACC---GCAGCGTCCCCTTAGTAACAGCTTGCTAT  
CCCCGCAACAAACCGAAGAGCACACAGTTG---CTTCCCCGCAGCGATGG  
TTTGTACCC---CTGCCAATAACCGACTGGACTTTGCCGCTCGGCATA  
CGATGCCGCCGCGGCTGCTGATTTTGGCCGTAACGCGGCCACCTTGCTGT  
CCTACGCAGCGGCTGGAGTAAAAGCAC-----TTCCCCTGCCCACTGCT  
GGGTGTTCAAACAGACCTTTGGGTTATTATGCCGATCCATCCG---GCTG  
G---GGCACC CGCACACCACCTCAGTACTGT-----AGTAAATCCA  
GCTCAGTGCTCTCGTGCTGGCCACAAATGCTGTTGGAAGCCTTACAGGC  
A---CGTCCAATTACCTGG-----CGGAGGA---TGGG---GACAC

---CATCCCTACGGAGAGGTCTCCA---AT---CGGAGTGCCAGAGGAG--  
--ACAAAACCAAAAGACTT-----GTCCGA---ATCCAGCTGGATAGAG  
---ACGCCGTCTTCAATAAAGTCGATCGATTCAAGTGATTCTGGAATCTT  
TG---AGCAGGCCAAACGGAGAAGAATTTACCCGTCTGCCACACCG----  
-----GTTACGGAGACAGTNNNNNNNNNNNNNNNNNNNNNN-----ACAGGCGAAGTCACAGACAGAG  
AAGTGGCTTTGGGGATAAATCCGTTCGCAGACGGGATGGGCGCTTTTAAA  
ATCAACCACAGCTCTCATGATCTTGGCTCCGG---GCAAACGGCGTTTTTC  
CTCCAAGCG---CCCGGCTAC---GCAGCCGCTGCCTTGGGA---CATC  
ATCA-----CCATCCGACCCATGTCAGCTCC---TACTCCACCGCCGCT  
TTCAATTCACCCCGGACTTTCTTTTTCGAAATCGGGGCTTCGGAGACGC  
GACCAG-----CGCCAACACAGTCTGTTCGCCTCCGC---AG  
CGGGAAGTTT---T-----GCAGGGCCACATGGACACTCAGATGCCGCG  
GGACACCTGCTCTTCCAGGACTTCACGAG---CAAGCCGCGAGCCATGC  
GTCTCCAATGTTGTAAACAGTCAGATGCGATTGGGTTTTTTCGGGGGACA  
TGTACGGGCGGGCTGACCAATATGGCCATGTTACGAGCCCACGGT---CC  
GACCACTACGCTTCGACCCAGTTGCATGGCTATGGCCCCATGAACATGAA  
TATGGCCGCA---CACCACGGAGCAGGGGCTTCTTCCGTTACATGAGGC  
AGCCGATCAAACAAGAGCTCATCTGCAAGTGGGTCGAGCCGGAGCAGTTG  
TCGAACCCGAAAAAGTCGTGCAACAAAACTTTTCAGCACGATGCACGAGCT  
CGTGACCCACCTGACAGTGAACATGTGGGGGGACCAGAGCAGTCAAACC  
ATATTTGCTTTTGGGAAGAGTGTTCGCCGAGAAGGAAAACCATTCAAAGCT  
AAATACAAACTTGTAAATCATATCAGAGTACACACCGGAGAAAACCGTT  
CCCATGTCCATTCCCGGCTGTGGCAA

>Macroramphosus scolopax

AGCTTACTTATCCGAGCAGAACTAAGCCAACCCGGCGCCCTTCTTGGGGA  
TGACCAAATTTATAACGTAATTGTTACGGCCACGCCTTTGTAATGATTT  
TCTTTATAGTAATACCAATCATGATCGGGGCTTTGGCAACTGACTTATT  
CCCCAATGATCGGAGCACCCGACATGGCATTCCCTCGAATGAATAACAT  
GAGCTTTTGACTACTCCCTCCCTCATTCCTTCTGCTCCTAGCCTCTTCTG  
GAGTTGAAGCCGGTGCGGGCACCGGCTGAACAGTCTACCCCCACTATCA  
GGAAACCTCGCTCACGCTGGGGCCTCCGTTGACTTAACCATTTTCTCCCT  
CCACTTAGCCGGTATTTTCATCTATTTCTAGGGGCCATTAATTTTCATCACA  
CTATTATTAACATGAAACCTCCCGCAATCTCGCAATACCAAACACCGCTC  
TTTGTATGAGCAGTACTAATTACAGCTGTTCTTCTCCTCCTCCTCCTCCC  
CGTCTGGCCCGCGCATCACAATGCTTCTCACGGACCGAAATTTAAATA  
CCACCTTCTTCGACCCCGCAGGTGGAGGTGACCCCATCCTCTACCAACAC  
CTA-----  
-----  
-----  
-----

-----NNNNNNNGAGAAACCTTACCCGTCTAACTGCCTCGGCATGCTGC  
TGCTCTCCGACGCCACCAGTGCACCAAGCTGTTCGGAGCTCTCCTGGGGC  
ATGTGTCTCAGCAACTTCCCCGCTATTTGCAAGACAGAGGACTTCTCCA  
ACTCCCCAAAGATATGGTGGTTCAGCTTTTGTCCCACGAGGAGCTGGAGA  
CAGAAGATGAGCGGCTTGTATGAGGCTGCCCTGAACTGGATCAACTAT  
GACCTGGACAGGAGGCACTGCCACCTCCCTGAGCTCCTCAGAACCGTCCG  
GCTGGCGCTGCTGCCCGCCATCTTTCTAATGGAGAATGTCTCGACGGAAG  
AGCTGATCAACGCCCAGGCCAAGAGCAAGGAGCTGGTGGACGAGGCCATC  
CGCTGCAAGCTGAGGATCCTGCAGAAATGACGGCGTTGTGAACAGCCAGTG  
TGCTCGACCCAGAAAGACCAGCCACGCCCTTTTCTTCTGGGGGGGAGAGA  
CGTTCATGTGTGACAAGTTGTACCTGGTGGACCAGAAGGCCAAAGAGATC  
ATCCCGAAGGCGGACATCCCCAGCCCCAGGAAGGAGTTCAGCGCCTGTGC  
CATCGGCTGTAAGGTGTACATCACAGGCGGAC--GAGGCTC-GGAGAACG









CGGTTGAGGCTGGAGCGGGGACCGGATGAACTGTCTACCCTCCCCTAGCA  
GGCAACTTAGCTCACGCAGGGGCATCCGTGGATTTAACTATCTTTTCTCT  
TCACTTAGCCGGAATTTTCATCAATTTTAGGGGCAATTAATTTTATTA  
CTATTATTAATATAAAAACCCCGCTATTACGCAGTACCAAACACCTTTA  
TTTGTCTGAGCCGTTTTAATCACAGCGGTACTTCTTTTACTATCACTTCC  
TGTACTAGCAGCCGGAATTAATACTTCTCACAGATCGAAACCTTAATA  
CTTCTTTCTTTGATCCTGCCGGTGGAGGTGACCCCATTTCTTTATCAACAT  
CTA-----

-----AGAGGATTACATTGTGGTCTTCTCT  
CGTTCCACAACAAGGTTGATCCTAAACGAAGCAGAGCTGATCATGGCGCT  
TGCCAGGAGTTTCAGATGAGAGTCTTGACAGTATCCCTGGAGGAACAGT  
CTTTTGCCAGCATCGTGCAGGTGATCAGCGGAGCCTCCATGCTGTTTCA  
ATGCACGGCGCGCAGCTCATCACATCGCTGTTTCCCTGCCCCGAGGTGCAGC  
CGTGGTGGAGCTGTTCCCTTACGCCGTGAACCCAGAGCAGTACACCCCGT  
ACAAAACCCTGGCCTCCCTGCCGGCATGGACCTCCAGTACGTCCTCGG  
AGGAACACGATGGAGGAGAACACCGTCACTCACCCGACCCGGCCCTGGGA  
CCAAGGGGGCGTGGTGCATTTGGAGAAGGAGGAACAAGAGCGCATACTAG  
CCAGCAAGGACGTCCCAGGCACCTGTGCTGCCGTAACCCAGAGTGGCTT  
TTCAGAATCTACCAGGACACTTTAGTGGACATCCCTTCACTCCTCGAGGC  
GCTCAA---GGATGGCCTCAGA---ACCAAGCCCAACTTGAAAAA---GA  
GCAAGGCGGCCAGTACAGTTACCCGGGCCGAGTCCGAGAACCCAGTGC  
AAGACCTCAGTCCAAGCTACCAACGAGGCCAAACTCACAGTGTCTTGGCA  
GATCCCGTGGAACTGAAGTTCCCTGAAGGTGAGAGAGGTGAAGTACGAGNNN-  
-----AAGAAGGATGCCAGCAAAGGAACCCTGGAGGATCAAATCATC  
CAGGCTAACCCCTGCCCTGGAGGCTTTGGTAATGCCAAAACCCCTGAGAAA  
TGACAACCTCCTCACGTTTTGGAAAAGTTTATCCGGATTTACTTTGGGAACA  
GTGGCAAGCTGAGCTCTGCAGACATTTGAGACCTACCTCCTAGAAAAGTCC  
AGGGTCACCTTCCAGCTCAAGTCAGAGAGGAACTATCACATATTTTCCA  
GATCTTGTCCAATCAGAAGCCAGAGCTGCTGGACATGCTGCTGATTACCA  
ACAACCCGTACGATTACTCCTACATCTCCAAGGAGAGGTAACCGTCGCC  
TCCATCAACGACTCTGAGGAGCTCATGGACACTGACAGTGCCTTTGACGT  
CCTTGGCTTACCCCTGGAAGAGAAGATGGGGGTGTACAAGCTGACTGGTG  
CCATCATGCACTACGGCAACATGAGGTTCAAACAGAAGCAGCGTGAGGAG  
CAGGCAGAGTCCGACGGGACTGAAGCAGCTGATAAATCAGCGTACCTCAT

GGGCTTGA ACTCTGCAGACCTCATCAAATGCCTCTGCCACCCCAGGGTGA  
AGGTAGGGAATGAATATGTCACCAAAGGTCAAGGGGTGGACCAAGTCTAC  
TAC-----

-----TACCTCATCTACGCTTCCTTCTCCTTCATGG  
GATGTTTACAGATCAGCGACGGCTCCAACGTGGTCAACCTGCTGGCCAGT  
AACTCTCCCAGTGTGTCCTACGCTCTGACACAGCAGAAGTACTTCAGTAA  
CTACAGTCCCGTCATTGGCTTCTATATCTACGAGCCCATCGAGTACTGGA  
ACTCCACGGTGCAGGAGCACCTGAAGACGCTGAGCCACGGCTTCAACAAG  
ATCTCCTGGATGGACAACCTTCTACCAGTACCTGCGCGTGGCCAACGTCAG  
CGCGGCCACCAAGAACGAGTTCATCCACATCCTGAAGGGCTCCTTCCTGC  
GCAGCCCGGAGTACCAGCACTTCACCGAGGACATCATCTTTTCCAAGA--  
-ACCGCGAGAGCA-----ACGAGTATGACATCATCGCCTCGCGCATGTA  
CCTGGTGGCCCGCACCACGGAGAAGAAGCGCGAGGAGGTGGTGGAGCTGC  
TGGAGAAGCTGCGGCCGCTGATGCTCATCAACAGCATCAAGTTCATCGCC  
TTCAACCCACCTTCGTGTTTTCATGGACCGCTACAGCTCCTCCGTCATCTC  
GCCCATCCTCACCTCCGGCTTACGCGTGCTACCCATCCTCATCCTCACCT  
TCTTCTGGTTCATCAACCCCCTGGGGAACCTGTGGTTGATCCTGACCGTG  
ACCTCGGTGGAGCTGGGCGTCTGGGCCTGATG-----





ACAACGAGGCTGATACTGAATGAAGCGGAGCTAATCATGGCGCTGGCCC  
AGGAGTTCCAGATGAGAGTGGTCACGGTATCCCTGGAGGAACAGTCTTTC  
CCCAGTATCGTCCAGGTGATCAGCGGTGCTTCCATGTTAGTCAGTATGCA  
TGGAGCTCAGCTTATCACCTCACTCTTCCCTCCCCAGAGGAGCTGCTGTGG  
TGGAGCTGTTCCCTTTGCCGTGAATCCAGAGCAGTACACCCCGTATAAA  
ACCTTGCCTCCCTTCCAGGCATGGACCTTCACTATGTCTCCTGGAGGAA  
CACTAAGGAGGAGAACACCATCACCCACCCAGACAGACCCTGGGAACAAG  
GGGGCATTGCTCACTTGGAGAAGGAGGAGCAAGAGCGAATACTGGCGAGC  
AAAGATGTCCCCAGGCACCTGTGTGCCGCAACCCAGAGTGGCTCTTCCG  
GATCTACCAGGACACTTTGGTGGACATCCCTTCCCTTCCCTGGAAGTCCTCA  
A---AGAGGGCATGAAG---ACAAAAGCCCAGCTTGAAGAA---GTCAAAG  
CCGGCCAGCACAGTCCATCCGGGCCGGGTGAGAGAACCCCAATGTCAGAC  
CTCAGTACAAACCCTAATGAGGCTAAACTCACAGTCTCCTGGCAGATCC  
CGTGAATCTGAAATACCTGAAGGTGAGAGAGGTCAAATATGAGGTG---  
-----AAAAAAGACACCAGCAAGGGGACACTGGAGGATCAAATCATCCA  
GGCGAACCTGCGCTGGAGGCCTTCGGCAACGCCAAAACATTGAGAAAACG  
ACAACCTCGTCTCGTTTTGGAAAATTCATCCGAATTCACCTTCGGTACGAGC  
GGCAAGCTGTGCTGCTGCTGACATCGAGACGTACCTGCTGGAGAAGTCACG  
TGCTCCTTTTCAGCTCAAGGCTGAGAGGAACTACCATATCTTCTACCAGA  
TCCTGTCCAATCAGAAGCCAGAGCTGCTGGACATGCTGCTGATCACCAAC  
AACCCATACGACTACTCCTACATCTCCCAAGGAGAGGTAACGGTCGCCTC  
CATCAACGACTCGGAGGAGCTGATGGCCACCGACAGCGCCTTCGATGTGC  
TCGGCTTCACTCCAGACGAGAAGATGGGCGTCTATAAACTGACCGGCGCC  
ATCATGCACTACGGCAACATGAAGTTCAAACAGAAGCAGCGTGAGGAGCA  
GGCGGAGCCGGACGGGACGGAGGCTGCTGACAAATCAGCTTACCTAATGG  
GGCTGAACTCTGCTGACCTCATTAAGGGCTGTGCCATCCAGAGTCAAG  
GTAGGAAATGAATACGTCACCAAAGGCCAAAGTGTGGATCAAGTCTACTA  
CNNNNNNNNNNNNNNNNNNNNNNNNNNNNNNNNNNNNNGGAAGCACTACAACACCAAGCTGGGATACAAGCGC  
CATGTGGCCATGCA  
CTCTGCCACGGCAGGGGATCTCACCTGCAAAGTGTGCATGCAGACCTACG  
AGAGCACGCCCGTGTCTTTGGAGCACCTCAAGAGCCACTCCGGGAAGTCT  
TCGGGTGGCACCAAGGAGAAAAAACCCCATGCGACCACTGTGACCGCCG  
TTTTACTACGCGGAAGGATGTGAGACGGCACATGGTGGTCCACACGGGCC  
GAAAGGACTTCCCTGTGCCAGTACTGTGCCAGCGCTTCGGCAGGAAGGAT  
CATCTGACACGCCACGTGAAGAAGAGCCACTCGCAGGAGCTGCTGAAGAT  
CAAGACGGAGCCTCCTGATATGTTAGGTCTTTTAGCGTCGGGGTCACCAC  
CCTGCTCTGTGAAGGAGGAGCTCAGCCCCATGATGTGCGGCATTGGTCCC  
AATAAGACCCCATGATGGGCAAACCGTTCCCCAGTGCGGCCCCCTTTCCC  
GATGGGCATGTACAACCCCCACCAT-----CTCCAGGCCATGTCTAATT  
CTGGGGTGGGTACCCA-----CACCCGTCCCTGATGCCCAGTTCCTTG  
TCTGCAGCTATGGGCATGGGCTGTACATGNNNNNNNNNNNNNNNNNNNNNNNNNNNNNNNNNNNNNNNNNNNNN  
NNNNNNNNNNNNNNNNNNNNNNNNNNNNNGTGAACCTGCTGGCTAGTAA  
CTCTCCGAGTGTTCGTACGCTCTGACCCAGCAGAAATACTTCAGTAACT  
ACAGTCCCCTGATTGGGTTTTACATTTACGAGCCCATCGAGTACTGGAAC  
TCAACGGTGCAGGAGCACCTGAAGACTCTGAGTCATGGCTTCAACAAGAT  
CTCCTGGATGGACAACTTTTTCCACTACCTGCGGGTGGTGAATGTGAGTG  
CGTCAACCAAGGGCGACTTCATCACCATCCTGAAGGGCTCCTTCCCTGCGC  
AGCCCGGAGTACCAGCACTTCACTGAGGACATCATATTCTCCAAGA---A  
CCGCGAGACTG-----ATGAGTACGACATTATCGCCTCACGGATGTACT  
TGGTGGCACGGACGACAGAGAAGAAGCGCGAAGAGGTGGTGGAGCTTCTG  
GAGAAGCTTCGTCCGTTGATGCTGATCAACAGCATCAAGTTCATTGCCTT  
CAACCTACGTTTTGTGTTTCATGGACCGCTACAGCTCCTCTGTTCATCTCGC  
CCATCCTGACCTCAGGCTTACAGGCTACTACAATCCTCATCTCACTTTC

TTCTTGGTCATCAACCCCTTGGGAACTTCTGNNNNNNNNNNNNNNNNNNNNNNNNNNNNNNNNNNNNNNNNNNNNNNNNNNNNN  
NNNNNNNNNNNNNNNNNNNNNNNNNNNNNNNNNNNNNNNNNNNNNNNNNNNNNNNNNNNNNNNNNTCTTGCAATGT  
TGGCATT  
ATTAATGGGCTCTCTGGATGTGCTTCCTCGGTGGATGACGCCCCAGCTGA  
CACCATCACTCGGCGGTTTTCGCTATGATGTGGCACTGGTGTGAGCATTA  
AGGATCTGGAGGAGGACATCATGGAGGGGCTGAGAGAGAGTGGGATGGAA  
GACAGTGCTTGACCTCAGGCTTCTAGTGTATGATCAAGGAGTCTTGTA  
TGGCATGGGCGATGTCAGCGAGAAGCACGGTGGAGGACCATTGTTTCCTG  
AGAAGGCTGTACGTTTTCTTTTCACTGTTATGTCTGTCTCTGTCTGGCA  
GACGAGGAGGAG-----GAAGAGGT  
TACCATCTTCACCGAGCCAAAGCCAAACTCAGAAGTGTCTGTAAAGCCCC  
TTTTGCTGACGTTTTGTGGACGAGTCAAGACACTCACAGCCGTC  
CTGGGGCCTATAGTTGCAGAACGCAAGGGATGAAAGAGAGCAGGCTCAT  
CCTATCCATGGGTGGACTACCACGCTCCTTCGGCTTTCACTTCAGAGGCA  
CGGGATACGATGAGAAGATGGTGCCTGAGATGGAGGGCCTCGAGGCCTCA  
GGGTCTCTCTATGTCTGCACTCTTTGTGACTCCAGTCCGGCAGACGCCTC  
TCAAAGCATGGTGCTACTCCTGCAGTCCCGCAGTCATGATGAGAACCTAG  
AACGTTACGAAATATGGAGAACCAACCCCTTTTCTGAGTCTGTAGATGAG  
CTGCGAGACAGAGTCAAAGGGGTCTCTGCCAAGCCCTTCATGGAGACCA  
TGCCACGCTGGATGCATTACTGTCAGATTGGCAATGCCGCGGAGTTCT  
ACAAAATCTTCCAGGACGAGATCGGGGAGGTGTACAAAAGGT---CAAC  
---CCCAGCCGGGAGGAACGGCGCAGCTGGAGGGCAGCCCTAGATAAACA  
GCTGAGGAAGAAGATAAAGCTTAAACCGGTAATGAGGATGAATGGGAAGT  
ATGCCCAGCAAGCTAATGACCAGGAGGCTGTGGAGGTGGTGTGTGAGCTG  
GTGCCCTCAGAAGAGAGGAGGGAGGCCCTGAGGGAGCTTATGAGGCTCTA  
CCTCCAGATGAAGCCTGTGTGGCGCCACCTGCCAGCCAAGGAGTGCC  
CCGACCAGCTGTGCCGCTACAGCTTAACTCCAGCGCTTTGCCGACCTC  
CTCTCTCTACCTTCAAATATAGGTACAACGGAAAGATAACCAATTACCT  
GCACAAGACCCTGGCCCATNNNNNNNNNNNNNNNNNNNNNNNNNNNNNNNNNNNNNNNNNNNNNNNNNNNNNNNNNNNNNNNN  
NNNNNNNNNNNNNNNNNNNNNNNNNNNTCGTACACCATCGACATGGGCCCCCTTGGGTC  
CCCGGTGGAAGGAGAGCCACAGCCTTTCTCCTGCTCCATTGAAGACCC  
ACAAAACAGACAAAGTTCAAGGGCATCAAGACGTACATTTCTGTACCGGGT  
CACGCCGAGCCACACAGGGCGTCCCGTCTACCGGCGCTACAAACTTTG  
ACTGGCTGTACAACCGCTTACTGCACAAGTTCACGTGTGATCTCCGTGCCT  
CACCTGCCTGAGAAGCAGGCCACGGGGCGATTTGAGGAAGACTTCATCGA  
GAAGCGCAAGAGGCGACTGATACTGTGGATGAACCACATGACCAGTCACC  
CGGTCTCTCCCAGTATGAAGGCTTTGAGCACTTCTGATGTGCGCTGAT  
GACAAGCAGTGGAAACTGGGCAAGAGACGGGCGGAGAAGGACGAGATGGT  
GGGCGCCATTTTATGTGACCTCCAGATCCCCAACGAGCACACAGGACC  
TTCAGGATGTAGAGGAGCGGGTCCGACTCCTTCAAGTCTTTGCTAAGAAA  
ATGGATGACAGCGTGATGCAGCTCACACACGTGCGCTCGGAGCTGGTGCG  
TAAGCACCTGGGTGGTTCAGGAAGGAGTTCAGCGGCTGGGAAATGCCT  
TCCAGTCTATCAGCCAGGCCCTCATGCTGGACCCTCCCCACAGCTCAGAA  
ACCTTCAACAACGCCATCTCCCAT-----  
-----  
-----  
-----  
-----  
-----  
-----  
-----  
-----  
-----







-----  
-----  
-----  
-----  
-----  
-----  
-----  
-----  
-----  
-----  
-----  
-----  
-----  
-----  
-----  
-----  
-----  
-----  
-----  
-----  
-----

-----GGCT  
ATCATCCCTTCRAATGGCAGCCGGCCCTCCGGAACGTTTCCCCGGCCTGC  
CAGGTGGGCATCATCGACGGCCTGTCAGGATGGACGGCTTCGGTGGACGA  
CTCCCCAGCGGACACCATCTCGCGGAGGTTCCGCTACGACGTGGCTCTGG  
TGTCTGCTCTGAAGGACCTAGAGGAGGACATCGTGGAGGGCTTGAGGGAG  
CACGGCCTGGAAGACAGTTCTGCACCTCTGGCTTCACCGTGACCATCAA  
GGAGTCTGTGACGGCATGGGGGACGTCAGCGAGAAGCACGGCGGGGGGC  
CGGCCGTTCCCGAAAAGGCCGTCGCTTCCTTCCTTCACCGTCATGTCCGTC  
TCCGTCCTGGCCGAGGGGGAGGAG-----  
----GAAGCGGTACCGTCTTCAGAGAGCCCAAGCCCAATTCCGAGATGT  
CCTGCAAACCTCTCTGTCTGATGTTGTGGACGAGTCGGACCACGAGACC  
CTGACGGCCATCTTGGGGCCTGTGGTGGCTGAGAGGAAGGCCATGAAGAA  
CAGCCGCCTCATCCTGCCATGGGGCGGCCTCCCTCGTCTCTCCGCTTCC  
ACTTCAGGGGCACAGGCTATGACGAAAAGATGGTGCGCGAGATGGAGGGC  
CTGGAGGCTTACAGGCTCCACCTACGTCTGCACCCCTCTGCGACGCCACCAG  
AGCTGAGGCCTCCCGAAACATGGTGCTGCACTCAGTCACCCGCAGCCACG  
ACGAGAACCCTGGACCGTTACGAGTTGTGGAGGACCAACCCGTACGGCGAA  
TCGGCGGACGAGCTGCGAGACCGGGTGAAAGGGGTCTCCGCCAAGCCCTT  
CATGGAGACCCAGCCACAATGGACGCGCTGCACTGTGACATCGGCAACG  
CCACCGAGTTCTACAAGATCTTCCAGGACGAGATCGGGGAGGTGCATTGC  
AGGCC---CAAC---CCGAGCAGGGAGGAGCGTCGGAGCTGGAGGGCGGC  
TCTGGACAAGCAGCTCAGGAAGAAGATGAAGCTGAAGCCCCTGATGAGGA  
TGAACGGCAACTTCGCCCGGGCGACTGATGACGGCGGAGGCGGTGGAGGCA  
GTGTGCGAGCTGGTGCCGTGCGACGCGGAGCGAAGCCCTCAGGGAGCT  
GATGAACCTCTACATCCAGATGAAGCCCCTGTCGGCGGCCACGTGCCCGG  
CCAAAGAGTGCCCCGACCAGCTGTGTCGCTACAGCTTCAACTCCCAGCGC  
TTCGCTGATCTCCTCTCTTCCACCTTCAAGTACAGGTACGACGGGAAGAT  
CACTAACTACCTCCTCAAGACTCTGGCGCACGTTTCTGAAATCATAGAGA  
GGGACGGCTCCATCGGGGCCTGGGCCAGTGAGGGGAACGAGTCGGGAAAC

AAA-----

-----GGCGAAGTCACAGAAAGAGAAGT  
GGCTTTGGGGATAAAATCCGTTTCGCAGACGGGATGGGTGCTTTCAAAATCA  
ACCACAGTTCGCATGATCTTGGCTCCGG---GCAAACGTCATTTTCCTCC  
CAAGCG---CCCGGCTAC---GCAGCCGCTGCCCTGGGA---CATCACCA  
-----CCACCCGACTCATGTCAGCTCT---TACTCTACGGCGGCTTTCA

ATTCCACCCGGGATTTTCTCTTCAGAAATCGAGGCTTCGGAGACGCTACC  
AG-----CGCTCAGCATAGTCTCTTCGCCCTCCGC---AGCGGG  
AAGTTT---T-----GCAGCCCCACATGGACACTCAGATGCAGCGGGAC  
ACCTGCTCTTCCCAGGACTTACGAA---CAAGCCGCGAGCCATGCTTCC  
TCAAATGTTGTTAATAGTCAGATGCGATTGGGCTTTTCGGGGGACATGTA  
CGGCAGAGCCGACCAGTATGGCCACGTTACCAGCCGCGGT---CCGACC  
ACTATGCTTCGACCCAGTTCATGGCTATGGCCCTATGAACATGAATATG  
GCCGCG---CATCATGGAGCAGGGGCCCTTCTTCGTTACATGAGACAGCC  
GATAAAACAAGAGCTGATCTGCAAGTGGATCGAACCGGAGCAACTAACGA  
ACCCGAAAAAGTTCGTGCAACAAAACTTTGTAGCACAATGCACGAGCTCGTC  
ACCCATCTGACGGTGGAGCATGTGGGAGGACCGGAGCAGTCGAACCACAT  
TTGCTTCTGGGAAGAGTGTGCCCGAGAAGGAAAACCATTCAAAGCCAAAT  
ACAAAACTTGTGAACCACATCAGAGTGCACACCGGAGAG-----

>Margrethia obtusirostra

AGCCTGCTTATCCGAGCAGAGTTAAACCAACCCGGTGCCCTTCTAGGCGA  
CGACCAAATTTACAACGTTATTGTTACGGCACATGCCTTTCGTAATAATTT  
TCTTTATAGTGATAACCAATTATGATTGGTGGCTTCGGAAATTGACTAATT  
CCCCTTATGATCGGAGCCCTGACATAGCCTTCCCTCGAATAAAACAACAT  
AAGTTTCTGACTTCTCCCTCCCTCTTCTTCTACTATTAGCCTCTGCAG  
GAGTTGAAGCCGGTGCCGGAACAGGATGAACAGTCTACCCGCCCCTTGCC  
GGTAATTTAGCCCACGCAGGGGCATCTGTTGATCTTACCATCTTCTCCCT  
TCACCTTGCAGGTGTCTCTTCAATCCTCGGAGCAATTAACCTTTATCACA  
CAATTATTAACATGAAGCCCCCAGCCATCTCCCAATACCAACACCTCTC  
TTCGTGTTGAGCTGTTCTCATTACTGTGTCTCCTTCTCTTGTCCCTCCC  
AGTACTGGCTGCCGGGATCACTATACTCCTCACAGATCGAAACCTAAACA  
CAACTTTCTTTCGACCCCTGCAGGAGGAGGAGACCCCATCCTCTACCAGCAC  
CTCTTCTGGTTCTTCGACACCCCGAAGTATACATTTTGTATTCTTCCAGG  
CTTTGGCATGATCTCCACATTGTTGCCTACTACGCAGGGAAAAAGAAC  
CCTTCGGGTACATGGGCATGGTCTGAGCCATGATGGCCATCGGACTCCTG  
GGCTTTATTGTCTGAGCCACCACATGTTACAGTCCGTATAGATGTAGA  
CACCCGAGCCTNTTCTGAGAGGAACCTGCACCCACCAACTGCCTGGGC  
ATGCTGCTGCTGTCCGACGCCACCAGTGCACCAAGCTGTCCGAGCTGTC  
CTGGGGCATGTGCCTCAGCAACTTCCACCACATCTGCAAGACGGAGGACT  
TCCTCCAGCTCCCCAAGGACATGGTGGTGCAGCTGCTGTCCCACGAGGAG  
CTGGAGACGGAGACGAGAGGCTGGTCTACGAGGCCGCCCTCAACTGGGT  
CAACTACGACCTGGAGAGGCGCCACTCCACCTGGCCGAGCTGCTGCGGA  
CAGTGCCTTGGCGCTTCTGCCC GCCATCTTCTCATGGAGAATGTGTCC  
ACGGAGGAGCTGATCAACGCCAGGTCAAGAGCAAGGAGCTGGTGGACGA  
GGCCATCCGTGCAAGCTGAAGATNNNNNNNNNNNNNNNNNNNNNNNNNNNN  
NCCCCGCAAGACCAGCCACGCCCTCT  
TCCTGCTGGGCGGGCAGACCTTCATGTGCGACAAGCTGTACCTGGTGGAC  
CAGAAGGCCAAGGAGATCATCCCCAAGGCGGACATCCCCAGCCCCAGGAA  
GGAGTTCAGCGCCTGCGCCATCGGCTGCAAGGTCTACGTACCCGGGGGA  
--GGGGTC--GGAGAACGGCGTGTCCAAGGACGTGTGGGTGTACGACACT  
GTCCAGGAGGAGTGGTCGAAGGCGGCGCCATGCTCATCGCCGGTTTCGG  
CCATGGCTCAGCCGAGCTGAAACACTGCCTCTACGTGGTGGGAGGGCACA  
CCGAGCCACGGGCTGCCTGCCGGCCTCCCCCTCG-----

-----  
-----  
-----  
-----  
-----  
-----  
-----  
-----  
-----  
-----  
-----  
-----

-----AAGAGGGATCCCAGCAAGGGAACCTTGGA  
GGATCAAATCATCCAGGCTAACCCCTGCCCTGGAGGCTTTCGGTAATGCTA  
AAACACTGAGAAATGACAACCTCATCACGCTTTGGCAAATTCATCCGGATT  
CACTTTGGAACCAGTGGCAAGTTGTCCTCTGCGGACATAGAGACTTACCT  
TCTGGAAAAGTACAGTGTACCTTTCAGCTCAAGGCAGAGAGGAAC TATC  
ATATCTTCTTCCAGATCTTGTCCAATCAAAGCCAGAGCTGTTGGACATG  
CTTTTAATCACCAACAATCCATWTGACTACTCCTACATCTCCAAGGAGA  
GGTAACAGTAGCATCCATCAATGATTCTGAGGAGTTGATGGCCACTGACA  
GCGCATTCGATGTGCTTGGCTTTACACCAGAGGAGAAAATGGGAGTCTAC  
AAGTTGACAGGTGCAATCATGCATTACGGCAACATGAAGTTCAAAGCAAAA  
GCAGCGAGAGGAGCAGGCAGAGCCTGACGGCACTGAGGCTGCTGACAAGT  
CAGCCTTCCTAATGGGGCTGAACTCTGCAGATCTAGTGAAAGGACTCTGC  
CATCCCAGGGTTAAGGTCGGCAATGAGTATGTCACTAAAGGGCAGGGTGT  
AGACCAAGTCTATTAC-----

-----  
-----  
-----  
-----  
-----  
-----  
-----  
-----  
-----  
-----  
-----  
-----  
-----  
-----  
-----  
-----

-----TATCTGATCTACGCCTCC  
TTCTCCTTCATGGGATGTTTACAAATCAGTGACGGTTCCAACGTGGTCAA  
CCTGTTGGCCAGCAACTCGCCGAGCGTGTCTACGCGCTGACCCAGCAGA  
AGTACTTCAGCAACTACAGCCCCGTCATCGGGTTCTACATCTACGAGCCC  
ATCGAGTACTGGAACCTCACGGTGCAGGAGCACCTGAGGACGCTGGGCCA  
TGGCTTCAACAAGATCTCCTGGATGGACAAC TACTTCCACTACCTGAAGG  
TGGTGAACGTGACCGCTCCACCAAGAGCCACTTCATCGCCATCCTCAAG  
GGCTCCTTCTGAGGAGCCCGGAGTACCAGCACTTCACAGAGGACATCAT  
CTTCTCGAAGA---ACGGCG-----ACGAGTACGACATCATCG  
CGTCCCGGATGTACCTGGTGGCGCGCACCACGGAGAAGACGCGGGAGGAG  
GTGGTGGAGCTGCTGGAGAGGCTGCGGCCGCTCTCCCTCATCAACAGCAT  
CAAGTTCATCGTCTTCAACCCACCTTCGTCTTCATGGACCGCTACAGCT  
CGTCCGTGGTCTCGCCCATCCTCACCTCGGGCTTCAGTGTCTCACCATC  
CTCATCCTCACCTTCTCCTGGTCATCAACCCGCTGGGGAACTTCTGGTT  
GATCCTGACGGTGACCTCGGTGGAGCTGGGCGTGTGGGCCTCATG-----

-----  
-----  
-----



-----GCCAA  
ATCTCGTTTTACCCCTGGCGTAGGGACTGGTCCTGGCACGGACC---GCA  
GCGTCCCACCTTAGTAACAGCTTGCTATCCCCGCAACAAACCGAAGAGCCC  
ACGGTTG---CTTCCCCACAGCGATGGTTTGTACCC---CTGCCAACAA  
CCGACTGGACTTTGCCGCCTCGGCATACGATGCTGCCGCTGCTGCAGATT  
TTGCCGGCAACGCAGCCACCTTGCTGTCCTACGCAGCGGCTGGAGTGAAG  
GCCC-----TTCCCCTGTCCACGGCAGGTTGCTCAAACAGACCTCTCGG  
TTATTATGCCGACCCATCAG---GTTGG---GGCGCCCGCACGCCACCAC  
AATACTGT-----AGCAAGTCCAGCTCAGTTCTCTCTTGCTGGCCC  
ACAAATACTGTTGGAGGCAGAACAGGCA-----CCAATTACCTGG----  
-----CTGAGGA---TGGG---GA-----CACAGAGAGGTCTC  
CA---AT---AGGCGCGTCCGACGAA---ACAAAACCAAAGACTT----  
--GTCCGA---GTCCAGCTGGATAGAG---ACGCCGTCTTCAATAAAGTC  
AATTGATTCAAGTGATTCTGGAATCTTTG---AGCAAGCGAAACGGAGAA  
GAATTTCTCCTTCTGTACACCA-----GTTTCGGAGGCCGTGTCC  
CCGTTGAAATCAGAG-----

>Megalops atlanticus

AGCTTACTAATCCGGGCTGAGCTAAGCCAACCCGGGGCACTACTTGGTGA  
TGACCAAATTTATAATGTCATCGTCACGGCACACGCCTTCGTAATAATCT  
TCTTTATAGTAATGCCTATTTTAATTGGTGGGTTTGGAAACTGACTAGTC  
CCTCTTATGATCGGGGCCCCAGACATAGCATTCCCCCGTATAAAACAATAT  
AAGCTTCTGGCTTCTCCCGCCGTCATTCCTTCTTCTGTTAGCTTCCTCGG  
GAGTCGAAGCGGGGCGAGTACTGGATGAACAGTCTACCCTCCTCTTGCT  
GGTAACCTAGCCCACGCAGGTGCATCTGTAGACCTTACCATCTTTTCTCT  
CCACCTGGCAGGTGTCCTCAATCCTAGGCGCTATCAACTTTATTACTA  
CAATTATCAACATAAAACCGCCCGCCATGTCACAAATACCAAACACCACTA  
TTCGTTTGATCTGTCTTAGTTACCGCAGTACTTCTCCTGCTATCTCTGCC  
GGTATTAGCTGCAGGTATTACTATACTCCTCACAGATCGCAATCTAAACA  
CAACCTTCTTTGACCCTGCAGGAGGAGGAGACCCAATCCTATAACCAACAC  
CTATTTTGATTCTTTGGACACCCAGAAGTTTATATCCTCATCCTGCCAGG





GCCAATACTGCGCCAGCGCTTCGGCCGCAAGGACCACCTGACCCGGCAC  
GTGAAGAAGAGCCACTCGCAGGAGCTGCTGAAGATCAAGACGGAGCCGCC  
GGACATGCTGGGCTGCTGGGGTCC-GCTCTCCGCCCTGCCCCGTC AAGG  
AGGAGCTCAGCCCGATGATGTG---CATGGGTCCCTCCAAGGACTCCCTA  
ATGGGGAAGCCTTTCCCGGCG-----CTTTCCCATGGGCATGTACAA  
CCCCAC-----TTGCAGGCCATGTCCA ACTCCGGGGTGCC-----  
-----CACC ACTCCCTGGTGTCTGGGTCACTGTCCGCGGC-ATGGGA  
ATGGGCTGCCMCA-----TACCTGATTTACGCGTCATTTTCGTT CATGGG  
ATGTTTACAAATCAGCGACGGATCGAACATAGTCAACCTTTTAGCCAGCA  
ACTCTCCAGCGTCTCCTATGCTCTCACCCAGCAAAAATACTTCAGCAAC  
TACAGTCCTGTGATTGGGTTCTACATCTACGAGCCATAGAGTACTGGAA  
TTCCACTGTTT CAGGAACACCTGAAGACACTGGGCCACGGATTCAATAAGA  
TTTTCTGGATCGACA ACTACTTTT CAGTATCTGAGGGTGGTGAATGTCAGC  
GCATCGACCAAAAGCGAATTCATATCTATCCTCCAGACTTCGTTCTTGAG  
GAGCCAGAGTACCAGCACTTCAAGGACGACATAATTTTTTACAAAA---  
TGAGGG-----ACGAAAACGGAGATCATCGCGTCCAGGATGTAC  
CTGGTGGCCAGAACCACAGAAAAACGCGTGAGGAGGTGGTGGAGTTACT  
GGAGAGACTGAGACCTCTGTCTCTTATCAACAGCATAAAGTTCA TTGTCT  
TCAACCCACCTTTGTGTTT CATGGATCGATACAGCTCCTCCGTCATTTCC  
CCCATCCTGACCTCTGGATT CAGCGTCTGATCGTTCTGATCCTGACGTT  
TTTTCTGGTCATCAACCCCTGGGAACTTCTGGTTGATTCTGACAGTCA  
CCTCAGTGGAGCTGGGCGTTCTTGGCCTCATGGGGTTCCACCCCTTCGAG  
TGGCAGCCGGCACTCAAGAATGTGTCCAGTGCCACTGAGGTGGGCATCAT  
TGATGGGTTGTCTGGGTTGGATGGCCACTGTGGATGACTCACCTGCAGACA  
CCATTGCCCGGAGGTTCCGCTACGATGTGGCTCTGGTAGCTGCATTGAAG  
GATCTTGAGGAAGACATAATGGAAGCCTGAGAGAGAATGGCTTGGAGGA  
CTGTGCCCTGCACAGGCGGGTTCTCTGTGGTGATCAAGGAGTCTTGTGATG  
GGATGGGGGATGTCAGTGA AAAGCACGGGGTGGGCCAACGGTCCCGAA  
AAAGCAGTGCGGTTCTCCTTTACGGTAATGTCAGTCTCCGTCCAGCTGGA  
AGGCAGGGGT-----GAGCAGATCA  
CAGTGTTCGGGAGCCAAAGCCTAACTCCGAGCTGAGCTGTAAGCCACTG  
TGCTGATGTTTGTGATGAGTCCGACCATGAAACACTGACCGCCGTGCT  
GGGGCTGTGGTGGCGGAGAGGAATGCTATGAAGGAGAGCCGGCTCATCC  
TGTCCATTGGAGGGCTCCTGCGCTCCTTCCGCTTCCACTTCCGAGGCACG  
GGCTATGATGAGAAGATGGTGAGGGAGATGGAGGGCCTGGAAGCTTCAGG  
ATCCACCTACATCTGTACCCTGTGTGACTCTACAAGGGCTGAGGCCTCCC  
AGAACATGGTGTGCTGCACTCCATCACCAGGAGCCATGACGAGAACCTGGAG  
CGCTATGAGATCTGGAGAACA AATCCCTACTCGGAGTCTGCTGAGGAGCT  
GCGTGACCGGGTCAAAGGTGTCTCAGCCAAGCCCTTCATGGAGACCCAGC  
CTACCATGGATGCGCTTCACTGTGACATTGGCAATGCCACTGAGTTCTAC  
AAGATCTTCCAGGATGAGATTGGTGAGGT-----CCAC--  
-CCCAGCCGCGAGGAGACGATGCTGGAGGTCTGCCCTTGACAAGCAGC  
TCAGAAAGAAGCTGAAGTTGAAGCCAGTGATGCGAATGAACGGGA ACTAC  
GCCC GGCGCCTGATGACCCGAGAGGCAGTGGATGCAGTATGTGAGCTGGT  
GCCCTCCGATGAGCGTAGGCAAGCCTTGAAGGAGCTGATGGAGCTCTACC  
TGCAGATGAAGCCGCTGGCGCTCTACATGTCTGTGCAGGAATGTCCA  
GACCAGCTCTGCCGCTATAGCTTCAACTCCCAGCGCTTTGCCGAGCTCCT  
CTCCTCCACCTTCAAGCACCGCTATGATGGCAAGATCACC AACTACCTCC  
ACAAGACCCTAGCCCACGTGCCTGAGATCATCGAGAGGGATGGCTCTATT  
GGGGCATGGGCCAGTGAAGGGAACGAGTCTGGGAACAAGTCTATGCTAT  
TGAGATGGGCCACTGGGGCCTCAGTGGAAAGGAGAGCCCCAGCCTTTCT  
CTTGCTCCATCGAGGACCCACSAAGCAGACAAAAGTTCAAGGGCATAAAG  
ACCTACATCTCATAACCGAGTGACACCTAGCCACACTGGCCGGCCAGTGTA



G---CAAGCGGCCACTCACGCGTCTTCCAATGTAGTAAACAGTCAGATGC  
GTCTGGGCTTTTCGGGGGACATGTACGGCAGAGCCGATCAGTACGGCCAT  
GTAACCAGCCCCAGGT---CTGATCATTACGCCTCGACCCAGCTGCACGG  
CTATGGCCCCATGAACATGAACATGGCTGCG---CACCATGGGGCAGGGG  
CCTTCTTTTCGGTACATGAGGCAACCGATAAAGCAGGAACCTTATCTGCAA  
TGGATCGAGCCGGAGCAATTGACGAACCCCAAAAAGTCCTGCAACAAAAC  
TTTCAGTACCATGCACGAGCTGGTTACGCACCTCACAGTGGAGCACGTTG  
GTGGACCAGAACAATCGAATCATATCTGCTTTTGGGAAGAGTGTCCCCGG  
GAAGGAAAACCGTTTAAAGCAAAGTACAACTTGTAAATCACATCAGAGT  
ACACACCGGCGAGAAACCCTTCCCTG-----

>Meiacanthus grammistes

-----  
-----  
-----  
-----  
-----  
-----  
-----  
-----  
-----  
-----  
-----  
-----  
-----  
-----  
-----  
-----  
-----  
-----  
-----  
-----  
-----  
-----

-----TTCTTGAAAGAAACCTTACCCGTCCTCAACTGTCTCGG  
TATGCTGCTTCTGTCTGATGCCCATCAGTGTACCAAGCTGTCTGAGCTCT  
CCTGGGGAATGTGCCCTCAGCAACTTCCCTGCGATCTGCAAGACAGARGAC  
TTCCCTCAACTGCCCAAAGATATGGTGGTGCAGCTCTTGTACATGAGGA  
GCTGGAGACAGAAGATGAGAGACTGGTTTATGAAGCYGCCCTTAACTGGA  
TCAACTACGACCTGGATAGGAGACACTGTCATCTTCCAGAGCTCTTGGA  
ACGGTGCGACTCGCCCTGCTGCCTGCCATCTTTTAAATGGAAAATGTCTC  
AACAGAGGAGCTCATCAATGCCCAAGCAAGAGCAAAGAGCTGGTGGATG  
AGGCCATCCGCTGTAAGCTGAAGATCCTGCAAAACGATGGAGTTGTAAAC  
AGCCCTTGTGCCCGTCCAAGAAAACAGCCACGCCCTGTTTCTTCTTG  
CGGGCAGACTTTCATGTGCGACAAGTTGTACTTGGTTGACCAGAAGGCCA  
AAGAGATCATCCCGAAAGCTGACATCCCCAGCCCAAGGAAGGAATTCAGT  
GCTTGTGCTATTGGCTGTAAGGTGTACATCACAGGTGGAC--GAGGCTC-  
GGAGAATGGCGTGTCCAAGATGTATGGGTCTATGACACGGTCCATGAGG  
AATGGTCAAAAGCCGCGCCCATGCTCATCGCCCGGTTCCGGCCATGGATCT  
GCAGAGCTTAAGCACTGTCTCTACGTTGTAGGAGGTCACACTGCTGCGAC  
TGGTTGCCTCCCGGCTTCTCCGTCAGGACGAGTACGTCGTGGTGTTCAGC  
CGCTCCGCCACGAGACTGATTCTAAACGAGGCCGAACGATCATGGCGCT  
GGTCCAGGAGTTCCAGATGAAGGTGGTCACGGTGTCTGTTAGAAGAACAGT  
CTTTCCCCAGCATCGTCCAGGTGATCAGCGGCGCTCCGCGCTAGTCAGC  
ATGCACGGCGCCAGCTCATCACCTCGCTCTTCCCTCCCCAGGGGAGCTGC  
TGTGGTGGAGCTCTTCCCCTTCGCGGTGAACCCGAACAATACACCCCGT  
ACAAAACCCTGGCCTCCTTGCCAGGCATGGACCTCCACTACGTCCTCGG  
AGGAACACCATGGAGGAGAACACCGTCAACCCAGACAGGTCCCTGGGA  
ACAAGGAGGCATCGCACACTTGGAGAGAGCGGAGCAGGAGCGCATCCTGG  
CGAGCAAGGACGTCCCCAGACACCTCTGCTGCCGAAACCCGGAGTGGCTC

TTCAGGATCTACCAGGACACCGCCGTAGACATCGCGTCCTTCTGGAAGC  
CGTGCG---GGAGGGCATGAAG---TCCAAACCCGGCTCCAAGAA---AT  
CCAAGGCGTCCGGCGTCGTCCACCCCGGCCGTGTCAGGGAGCCCCAGTGT  
CAGACCTCGGTCCAGACCAGCAACGAGGCCAAGCTCACCGTCTCCTGGCA  
GATCCCGTGAATCTCAAGTATCTGAAAGTGCGAGAGGTGAAGTACGAGG  
TGTGGATCNNAAGAAAGACACCAGCAAAGGTACCC TGGAGGACCAGATCATC  
CAGGCCAATCCAGCTTTGGAAGCCTTTGGTAATGCCAAAACAGTGAGGAA  
CGACAAC TATCCCGTTTTGGAAAATTCATCCGGATTCACTTTGGCACAA  
GTGGAAAGCTGTTCGTCCGCCGACATTGAAACATACCTGCTGGAAAAGTCA  
CGGGTGACGTTTTAGCTGAAGGCTGAGAGAGACTACCACATCTTTTATCA  
AATTCTGTCCAATCAGAAGCCAGAGCTGCTGGACATGCTCCTGATCACCA  
ACAACCCCTACGACTACTCCTACATCTCTCAGGGTGAGGTGACGGTCACC  
TCCATCAACGATTCCGAGGAGCTGATGGCAACCGACAGCGCCTTTGACGT  
GCTGGGCTTACACCAGACGAGAAGATGGGCGTGTACAAGCTGACCGGCG  
CCATCATGCATTACGGCAACATGAAGTTCAAACAGAAGCAACGCGAGGAG  
CAAGCTGAGCCCGATGGCACTGAAGCAGCCGACAAGTCRGCCTATCTGAT  
GGGGCTGAACTCGGCCGACCTCATCAAGGGATTGTGCCATCCAAGGGTCA  
AGGTTGAAAATGAGTACGTCACCAAAGGTCAAAGTGTGGACCAAGTCTAC  
NNNCCTAACAAGGAAGCCTTCAAGTGTGAGGAGTGTGGGAAGCACTACAACAC  
CAAGCTGGGATACAAGCGCCATGTGGCCATGCACTCTGCCACGGCGGGGG  
ATCTGACCTGTAAAGTGTGTATGCAGAGCTACGAGAGCACGCCCGTTCTC  
CTGGAGCACCTCAAGAGCCACTCGGGAAAGTCTTCGGGTGGTGCCAAGGA  
GAAGAAGCACCCGTGCGACCCTGCGACCCTCGTTTCTACACGCGGAAAG  
ACGTGAGGCGGCACATGGTGGTCCACACCGGTGCAAAGGACTTCTGTGC  
CAGTACTGCGCACAGCGCTTCGGCAGGAAAGACCATCTGACGCGCCACGT  
GAAGAAGAGCCACTCGCAGGAGCTGCTGAAGATCAAGACGGAGCCTCCGG  
ATATGCTAGGTCTTTTGGCCACGGGGTCGCCGCCATGCTCGGTGAAGGAA  
GAGCTCANCCCCATGATGTGCGGCATGGGGCCCAACAAGATCCCATGATG  
GGCAAACCATTTCCAGTGGAGCCCCCTTTCCGATGGGCATGTACAACCC  
CCATCAC-----CTTCAGGCCATGTCAAATTCTGGGGTGGGCCACCCG-  
-----CACCCGCCCTGATGCCAGGCCCTTTGTCTGCAGCTATGGGCATG  
GGATGCCACATGGAGTATCTCATCTACGCGTCTTTCTCCTTCATGGGATG  
TTTACAAATTAGTGATGGATCGAACATCGTGAAC TTGCTGGCTAGTAACT  
CTCCAGTGTTCCTATGCTCTGACCCAGCAGAAATACTTCAGTAACTAC  
AGTCCCCTGATTGGGTTTTATATTTACGAGCCAATCGAGTATTGGAACTC  
CACCGTGCAGGAGCACCTGAAAAC TCTGAGTCACGGCTTCAACAAAATCT  
CCTGGATGGACAATTTTTTCCACTACCTGCGGGTGGTGAACGTGAGCGCC  
TCAACGAAGAACGACTTCATCACCATCCTGAAGGGTTCGTTCTCCTCCGGAG  
CCCGGAGTACCAGCACTTACCCGAGGACATCATATTTCTCAAAGA---ACC  
CAGAGACCG-----ATGAGTACGACATCATCGCGTTCGAGGATGTA CTG  
GTCGCGCGGACCATGGAGAAGAAGCGCGAGGAGGTGGTGGAGCTTTTGGGA  
AAAGCTCCGCCCTTTGATGCTCATCAACAGCATCAAATTCATTGCC TTCA  
ATCCACGTTTTGTGTTTATGGACCGCTACAGCTCCTCCGTCATCTCACCT  
ATCCTGACCTCAGGCTTCAGCGTACTCACCATCCTCATCCTCACTTTCTT  
CCTTGTCATCAACCCACTGGGGAAC TCTGGCTCATCCTTACAGTTACGT  
CCGTGGAGTTGGGCGTCTTGNNNNNNNNGGTTTTACCAGTTTGAGTGGCAGCCAGC  
CCTCAAGAATGTGTGACAACCTTGCTGTGTTGGCATTATTAATGGGCTCG  
CTGGATCCGCGTTCTCGGTGGATGATGCCCGGCCGACACCATCACTCGC  
CGCTTTCGCTATGATGTGGCACTAGTGTGTCAGCATTAAGGATCTAGAGGA  
GGACATCATGGAGGGATTGAGAGAGAATGGGATGGAAGACAGTGCTTGCA  
CCTCAGGCTTTAGTGTTGTGATCAAGGAGTGCTGTGATGGCATGGGTGAT  
GTCAATGAGAAGCATGGTGGTGGACCAATTGTTGTCYGAGAAGGCTGTGCG  
TTTCTCTTTCACTGTGATGTCTGTCTCAGTCCTGCCAGATGATGAGGAG-

-----GGAGAGGTTTCCATTTTCACT  
GAGCCAAAGCCCAACTCAGAACTATCCTGTAAGCCCCTCTGTCTTATGTT  
TGTGGATGAGTCAGACCATGAGACACTCACAGCTGTCCTGGGGCCATAG  
TCGCAGAGCGCAATGCAATGAAAGAAAGCAGACTCATCCTGTCCATGGGA  
GGCTTGCTCCGTTTCAATTCGCTTCCACTTTAGGGGCACCGGGTATGATGA  
GAAGATGGTGCCTGAGATGGAAGGACTGGAAGCCTCCGGGTCTTCATATG  
TCTGTACTACTGTGTGACGCCAGTCGTGCAGAGGCCCTCACAACATGGTG  
CTGCACTCAATCACACGTAATCATGAAGAGAACTTAGAACGTTATGAAAT  
ATGGAGAACCAATCCCTTCTCTGAGTCTGTAGATGAGCTACGAGAAAGAG  
TAAAAGGAGTGTCTGCCAAACCCTTTATGGAGACTCACCCCATGCTCGAC  
GCACTGCACTGCGACATTGGCAATGCCACTGAATTCTACAAAATCTTCCA  
GGACGAGATTGGAGAAGTTTACAAAAGGT---CAGT---CCCAGCCGGG  
AGGAACGCCGCAGCTGGCGGGCAGCCCTCGATAAACAGCTGAGGAAGAGG  
ATGAAGCTTAAACCGGTAATGAGGATGAATGGGAACTATGCCCGCAGGCT  
AATGACCCAGGAGGCTGTGGAGGTGGTGTGTGAGCTTGTGCCCTCAGAGG  
AGAGGAGGGAGGCCCTGAGGGAGCTTATGAGGCTGTATATACAGATGAAG  
CCTGTGTGGCGTGCCACCTGCCAGCAAAGGAGTGCCCTGACCAGCTGTG  
CCGCTACAGCTTCAACTCCCAGCGCTTTGCTGACCTCCTCTCCTCTACCT  
TTAAATATAGGTACAATGGAAAGATAACCAATTATCTGCACAAGACCCTT  
GCTCATGTTCTGAGATCATTGAGAGAGATGGATCTATTGGAGCCTGGGC  
CAGCGAGGGAAACGAGTCAGCTAACAAATCGTACACCATTGAGATGGGGC  
TTCTGGGACCCCGGTGAAAGACAACCCACAGCCTTTCTCCTGCTCCATT  
GAAGACCCACCAAACAGACCAAGTTTAAAGGTATCAAACCTACATATC  
GTACCGGGTCACCCCGAGCCACACGGCGCACCCCGTCTACAGACGCTACA  
AACACTTTGACTGGCTGTACAACCGCTTACTGCACAAGTTCACTGTGATC  
TCCGTGCCCCACCTGCCCGAGAAGCAGGCCACGGGCGGATTTCGAGGAGGA  
CTTCATTGAGAAGCGCAAGAGGGCAGCTGATCCTGTGGATGAACCACATGA  
CCAGTCAACCGGTCCTTTCCAGTACGAGGGCTTCGAGCACTTCTCATG  
TGCGCCGATGATAAACAGTGGAAACTGGGCAAGAGGCGGGCGGAGAAGGA  
CGAGATGGTGGGTGCCCACTTCATGCTGACCCTCAAATCCCCAACGAGC  
ACCAGGACCTTCAAGACGTCGAGGAGAGGGTGGACAACCTTCAAGCCTTC  
GCTAAGAAAATGGACGACAGCGTGTGTCAGCTCACTCACGTTGCCTCGGA  
GTTGGTGCAGCAAGCACTTGGGTGGATTTCAGGAAAGAGTTTCAACGGCTGG  
GTAATGCTTTCCAGTCCATCAGCCAGGCGTTCATGCTGGACCCCTCCCAT  
AGGTCAGACACCCTCAACAACGCCATCTCCCATNNNNNNNNNNNNNNNNNNNN  
NNNNNNNTGGCGTCCGGTGTGGTT  
GGAAACCTCCTGATCTCCATCCTGCTGGTAAAAGACAAGAGCCTGCACCG  
AGCACCTACTATTTCTGCTAGACCTGTGCGCCTCTGACATCCTGCGCT  
CGGCCATTTGCTTCCCCTTTGTCTTACGTCGGTCAAGAATGGATCTGCC  
TGGACCTACGGCACGTTGACCTGCAAAGTGATTGCCCTCCTCGGGGTGCT  
CTCCTGTTTCCACACGGCGTTCATGCTTTTCTGTGTCAGCGTGACCCGGT  
ACCTGGCCATCGCTCACCACCGATTCTACACAAAAGGCTAACTTTCTGG  
ACGTGCTTGGCCGTATCTGCATGGTGTGGACTTATCCGTGGCTATGGC  
GTTCCCACCGGTGCTAGACGTGGGGACGTA CTCTTTTATCCGCGAGGAGG  
ACCAGTGCACGTTTCCAGCACCGTTCCTTTCAGGGCGAATGATTCTGTTGGGC  
TTCATGCTCCTGCTGGCACTCATTCTCCTCGCCACACAGCTGGTTTACCT  
CAAGCTCATCTTCTTCGTCCACGACCGCCGAAAAATGAAGCCCGTCCAGT  
TTGTGCCTGCCGTGAGCCAGAACTGGACCTTCCATGGGCCGGGGCCAGC  
GGGCAGGCGGGGCTAATTGGCTGGCCGGATTTGGTCGAGGCCCCACCC  
GCCTACTTTGCTGGGAATCCGGCAAACAGCAACGCGTCGGGCCGCAGGC  
GCCTACTGGTATTAGATGAATTCAAAACGGAGAAGAGGATTAGTAGGATG  
TTCTACATCATGACGTTTTTCTTCTTGGCACTGTGGGGGCCCTACCTGGT  
TGCTGCTACTGGCGGGTGTGTTGCAAGGGGCCCGTAGTTCTTGGGGGCT

ACCTGACAGCAGCCGTGTGGATGAGCTTTGCTCAGGCTGGGGTCAATCCT  
TTCATCTGCATTTTCNNNNNNNNNNNGCCAAATCTCGCTTTCACCCTGGCGTGGGGACTGG  
TCCTGGCACGGAGC---GCAGCGTCCCACTCGGCAACAGCTTGCTATCCC  
CGCAGCAAAGCGAGGAGCCCACTGTTGCCACCCCCCGCAGCGATGGT  
GTCACCC---CTGCCAACAACCGACTGGACTTTGCTGCCTCGGCATACGA  
CGCCGCT-----GATTTTGCCGGTAAACGGGCCACCTTGCTGTCCT  
ACGCAGCGGCCGGAGTGAAAGCTC-----TTCCCTGTGCTGACTGCAGGC  
TGCTCCAATCGGCCCTTGCTACTACACAGACCCGTCTG---GCTGG--  
-GGGGACGCACGCCGCGCAGTACTGCGGCGTAAACGCCAAATCCGGCT  
CGGTGTTTTCTGCTGGCCCACTAACTCCATCGGTAGCAGGGCCGGGG--  
-CC---AACTACCTGT-----CCGAGGA---GGGA---GACTC---  
CATCACCACGGAGAGGTCGCC---AT---CGGCGCTCGGAGGAG---G  
CCAAACCCAAAGACATGAC---GTCCGA---GTCGAACTGGATAGAA---  
ACGCCGTCCTCCATCAAGTCCATCGATTCCAGCGACTCTGGCATCTTCG-  
--AGCAGGCCAAGAGAAGGAGAATCTCACCTTCCAGCCACGCCG-----  
--GTCTCAGAGACAGTGTCCCCCTCAAANNNNNNNNNNNNCTCAACAGGCCGAAGTACAGAG  
AGAGAAGTGGCGTTGGGGATAAATCCGTTCGCGGATGGGATGGGCGCCTT  
CAAAATCAACCACAGCTCCACGACATTGGCTCCGG--ACAGACGGCGT  
TCTCCTCCAGGGC---CCCGGCTAC---GCGGCGGCCGCGCTGGGA---  
CACCATCA-----CCACCCGACCCACGTTGGCTCT---TACTCCACGGC  
GGCTTTCAACTCCACCAGGACTTTCTCTTTCAGAAAATCGGGGTTCGGGG  
ATGCCGCCGG-----GGCGCAGCACAGTTTGTTCGCCCTC----  
-----CGGGAGTTT---T-----GCAGGGCCACATGGACACTCGGATGC  
GGCGGGGCACCTGCTATTCGCCGGGCTGCACGAG---CAGGCGGCGAGCC  
ACGCGTCTTCGAACGTCGTCAACAGCCAGATGCGGCTGGGTTTCTCGGG  
GACATGTACGGACGGGCCGACCAGTACGGCCACGTCACGAGTCCGAGGT-  
--CCGATCACTACGCTCGACCCAGCTGCACGGCTACGGCCCATGAATA  
TGAACATGGCCGCG---CACCACGGAGCAGGGGCTTCTTCCGTTACATG  
AGGCAGCCCATCAAGCAAGAACTCATCTGCAAGTGGATCGAACCAGGCA  
GCTGACGAACCCCAAAAAGTCGTGTAACAAAACCTTTAGCACCATGCACG  
AGCTGGTGACCCACCTGACGGTGGAGCATGTGGGGGACCCGAGCAGACC  
AACCACATTTGCTTCTGGGAGGAATGCTCCAGAGAAGGAAAGCCATTCAA  
AGCCAAATACAAACTGTAAATCATATCAGAGTTCACACCCGGAGAAAAGC  
CCTTTCCGTGTCCGTCCCCGGCTGTGGCAA

>Melamphaes polylepis

-----  
-----  
-----  
-----  
-----  
-----  
-----  
-----  
-----  
-----  
-----  
-----  
-----  
-----  
-----  
-----  
-----  
-----  
-----  
-----  
-----  
-----  
-----

-----TTTCTAGAGAGGAACCTCTACCCATCCAACTGCCTTGG  
CATGCTGTTGCTGTCCGATGCTCACCAGTGTACCAAGCTGTCAGAGCTCT

CCTGGGGCATGTGCCTCAGCAACTTTCCTGCTATTTGCAAGAAGGAAGAC  
TTCCTCCAAGTCCCAAAGACATGGTGGTGCAGCTCCTGTCCCACGAGGA  
GCTGGAGACAGAAGACGAGAGACTGGTTTATGAAGCTGCCCTCAACTGGG  
TCAACTACGACCTGGAAAGGAGGCAC TGCCAAGTCCAGAGCTGCTGAGA  
ACGGTCCGGCTGGCCCTGCTGCCCGCCATATTCCTCATGGAGAACGTCTC  
CACAGAAGAGCTGATCAACGCCAGGCCAAGAGCAAGGAGCTGGTCGATG  
AAGCCATCCGCTGCAAGCTGAAGATCCTTGCAAGACGACGGTGTGGTGAAC  
AGCCCCGTGTGCTCGACCGAGAAAAACCAGCCACGCCCTCTTTCTGCTGGG  
TGGGCAGACCTTCATGTGTGACAAGCTGTACCTGGTGGACCAGAAGGCCA  
AAGAGATCATCCCCAAGGCAGACATCCCCAGCCCCAGGAAGGAGTTCAGC  
GCCTGCGCCATCGGCTGTAAGGTCTACATCACAGGTGGGA--GGGGCTC-  
AGAGAAATGGTGTGTCCAAAGATGTGTGGGTCTACGACACTGTCCACGAGG  
AATGGTCCAAGGCAGCACCCATGCTCATCGCCAGGTTCCGGTCATGGCTCT  
GCCGAGCTGAAACACTGCCTCTATGTGGTCCGAGGTCACACAGCTGCCAC  
TGGCTGCCTCCCAGCCTCCCCCTCCGGAAGAATACATCATCATGTTTCAGT  
CGTTCAGTGACGAGGCTGATCCTGAATGAAGCAGAGCTAATCATGGCGCT  
GGCACAGGAGTTTCAGATGAGAGTGGTTACGGTGTCCCTAGAGGAACAAA  
CTGTTGCCAGCATTGTCCAGTTGATCAGCGGGGCTTCCATGTTAGTCAGC  
ATGCATGGAGCTCAGCTAGTCACCTCACTCTTCCCTCCCAGAGGAGCTGC  
TGTGGTGGAGTTGTTCCCCTATGCTGTGAATCCAGAACAGTACACCCCAT  
ACAAAACGCTTGCCCTCCCTACCAGGCATGGACCTTCAATACGTGGCCTGG  
AGGAACACTATGGAGGAGAACACCATCACCCACCCAGGCCGACCCCTGGGA  
ACAAGCGGCATCGCTCATTTGGAAAAGGACGAGCAAGAGCGAATACTGG  
CCAGCAGGGATGTTCCAGGCACCTGTGCTGCCGCAACCCGGAGTGGCTC  
TTCCGAATCTACCAAGACACTTTGGTGGACATCCCTTCATTGCTGGACGT  
CCTCAA---AGAGGGCCTGAGG---GCCAGGCCAGCTTAAAGAA---GG  
CCAAGCCGGCCAGCACCGTTACCCGGGCCGGGTCAGAGAACCCCAAGTGC  
CAAACCTCAGTCCAAGCCACCAACGAGGCAAAACTCACAGTTTCTGGCA  
GATCCCCTGGAACCTGAAGTACCTAAAGGTGAGAGAAGTGAAGTATGAGG  
TGTGGATCCAGAAGAGGGATAACCAGCAAGGGAACACTGGAAGATCAAATC  
ATCCAGGCAAACCCCTGCCCTGGAGTCCTTTGGTAACGCCAAAACACTGAG  
GAATGACAACCTCATCCCGTTTTGGAAAATTCATCCGAATTCACTTTGGAA  
CCAGTGGCAAGCTGTCTGTGCTGACGTTGAGACTTACCTACTGGAGAAG  
TCACGTGTCACCTTTCAGCTCAAGGCTGAGAGGAACATCACATCTTCTT  
CCAGATCTTGTCCAATCAGAAGCCAGAGCTTCTGGACATGCTGCTGATTA  
CCAACAACCCATACGACTACTCTTTCATCTCCCAAGGAGAGGTAACAGTA  
CACTCCATCAACGATTCAGAGGAACTGATAGCCACTGATAGCGCCTTTGA  
TGTGCTTGGCTTCAGTTCAGATGAGAAGATGGGAATCTACAAGCTGGTCCG  
GTGCCATTATGCACTATGGCAACATGAAGTTC AAGCAGAAGCAGCGTGAG  
GAGCAAGCTGAGCCTGACGGAACAGAGGCTGCTGACAAGGCAGCTTACCT  
GATGGGGCTGAACTCTGCAGATCTCATCAAAGGACTGTGCCATCCCAGAG  
TCAAAGGTAGGAAATGAATATGTCACCAAAGGCCAGGGTGTAGAACAAGTC  
TACTACCCCAACAAGGAGGCCTTCAAGTGCAGGAGTGCAGGCAAGCACTA  
CAACACCAAGCTGGGATACAAGCGCCATGTGGCCATGCACTCGGCCACGG  
CGGGGGACCTCACCTGCAAAGTGTGCATGCAGAGCTATGAGAGCACGCCC  
GTGTTGCTGGAGCACCTCAAGAGCCACTCGGGGAAGTCCCTCAGGGGGCGC  
CAAGGAGAAGAAGCACCCGTGTGACCACTGTGACCCCGCTTCTACACCC  
GCAAGGATGTGAGACGGCACATGGTGGTCCACACGGGCCGAAAGGACTTC  
CTGTGCCAGTACTGCGCCAGCGCTTTGGCAGGAAGGACCACCTGACGCG  
GCACGTCAAGAAGAGTCACTCGCAGGAGCTGCTGAAGATCAAGACGGAGC  
CTCCGGATATGTTAGGGCTTTTAGGTTCCGGTTCCCCGCCTTGCTCTGTC  
AAGGAGGAGCTCAGCCCTATGATGTGCAGCATGGGTCCCAACAAAGACCC  
TATGATGGGCAAGCCCTTCCCAGCGGTACCCCTTCCCGATGGGCATGT



ACAACCCCTCACCAC-----CTCCAGGCCATGTCCAATCCTGGGGTGGGT  
CACCCG-----CACCCCTCCCTGATGCCCGGTCCCCTGTCTGCAGCTAT  
GGGCATGGGCTGCCACATGGAGTATCTCATCTACGCCTCRTTTTTATTCA  
TGGGATGTTTTACAAATCAGCGATGGGTCAAACATTGTGAACTTGCTGGCT  
AGTAACTCTCCAAGCGTTTTCGTTTGCTCTGACCCAGCAGAAATACTTCAG  
TAACTACAGCCCCGTGATTGGGTTTTACATTTACGAGCCCATTGAGTACT  
GGAACTCCACGGTGCAGGAGCATCTGAAGACACTGAGTCATGGTTTTCAAC  
AAGATCTCCTGGATGGACAACCTTCTTCCACTACCTGCGGGTGGTGAACGT  
GAGTGCCTCGACCAAGAGCGACTTTATCACCATCCTCAAGGGTTCCCTCC  
TGCGCAGCCCGGAGTACCAGCACTTCACCGAGGACATCATCTTCTCCAAG  
A---ACCGCGAGAGYG-----ACGAGTATGACATTATTGCCTCGCGCAT  
GTACCTGGTGGCGCGGACCACGGAGAAAAGGCGGAGGAGGTGGTGGAGC  
TTCTGGAGAAGCTGCGTCCGCTGATGCTGATCAACAGCATCAAGTTCATC  
GCCTTCAACCCACCTTTGTTTTTATGGACCGCTACAGCTCCTCTGTCAT  
CTCGCCATCCTGACCTCAGGCTTCAGCGTGCTCACCATCCTCATCCTCA  
CATTCTTCTGGTCACTAACCCTTGGGAACTTCTGGCTCATCTTGACG  
GTTACTTCTGTGGAACCTGGGCGTCTTGGGTTAATGNNNNNNNNNNNNNNNNAGTGGCAGCCGGC  
CTCAAAAATGTGTCTGCATCGTGCCATGTTCGGCATTATTAACGGGCTCTC  
TGGATGGGCTGCCTCAGTGGACGACTCCCAGCTGACACCATCACTCGGC  
GATTCCGCTATGATGCGGCCCTGGTGTCGGCCTTAAAGGATCTGGAGGAG  
GATATCATGGAGGGACTGCGAGAGTGTGGGCTGGAAGACAGTGCTTGCAC  
CACGGGCTTCACTGTTTTGATCAAGGAATCGTGTGACGGCATGGGAGATG  
TCAGTAAAAGCACGGTGGCGGGCCTATGGTCCCCGAGAAGGCTGTACGT  
TTCTCTTTTACTGTCATGTCTGTCTCTGTCTTGGCAGAAGGAGAGGAG--  
-----GAGGAGTTACCATCTTCAGGG  
AGCAAAAGCCGAACCTCAGAACCTGTCCCTGTAAGCCCCATGTCTGATGTTT  
GTGGATGAGGCAGACCACGAGACACTCACTGCCGTCCTGGGGCCCGTCGT  
TGCAGAGCGAAACGCTATGAAGCAGAGTCGACTCATCCTATCTGTGGGTG  
GCCTGCCTCGCTCATTTTCGCTTCGAGTTCAGAGGCACGGGATACGATGAG  
AAGATGGTGCCTGATTTGGAGGGCCTGGAGGCCTCAAGCTCCACCTACAT  
CTGCACCTCTGTGTGACTCCACACGGGCAGAGGCCTCCCACAACATGGTGC  
TGCACCTCCATCACCCGAGTCATGACGTAAACCTGGAGCGTTATGAAATA  
TGGAGACCAATCCGTTTTTCGAGTCCGCCGACGAGCTGCGAGACCAGGGT  
CAAAGGTGTCTCCGCCAAGCCCTTCATGGAGACCCTCCCACCTCTGGATG  
CATTGCACTGTGACATNGGTAATGCTACAGAGTCTACAAAATCGTCCAGG  
ATGAAAACGGGGAGTGCTACCAAAAGGC---CAAC---CCCAGCCGGGAG  
CAGCGGGCAGCTGGAGGGCAGCTCTAGACAAGCAACTGAGGAAGAAGAT  
GAAGCTTAAACCGGTGATGAGGATGATTGGGAACATATGCCCGGAAGCTAA  
TGACGAAGGAGGCCGTGGAGGTGGTGTGTGAGCTGGTGCCTCAAAGAAG  
AGGAAGCAGGCCCTGAGGGAGCTTATGGGGTCTCTCTGCAAATGAGGCC  
TGGTGTGGCTGCCACCTGCCAGCAAAGGATGCCNNNNNNNNNNNNNNNNNNNNNNNNNNNNNNNNNNNN  
NNNNNNNNNNNNNNNNNNNNNNNNNNNNNNNNNNNNNNNNNNNNNNNNNNNNNNNNNNNNNNNNNN  
NNNNNNNNNNNNNNNNNNNNNNNNNNNNNNNNNNNNNNNNNNNNNNNNNNNNNNNNNNNNNNNNNN  
NNNNNNNNNNNNNNNNNTCGTACACCATTGAG  
ATGAGCCCCAAGGGGCCCCAGTGGAAAGGAGAGTCCGCAGCCCTTCTCCTG  
CTCTGTTGAAGACCCACAAAGCAGACCAAGTTCAAGGGCATCAAGACCT  
ACATCTCGTACCGGGTCACGCCGAGCCACACGGGACGTCCCGTCTACAGG  
CGCTACAAACACTTTGATTGGCTGTACAGCCGCCTGCTGCACAAGTTCAC  
TGTGATCTCCGTGCCACCTGCCGGAGAAGCAGGCCACGGGCCGCTTCG  
AGGACGACTTCATCGAGAAGCGCAAGAGAAGGCTGATCCTGTGGATGAAC  
CACATGACCAGCCATCCGGTCTCTCCAGTACGAGGGCTTCGAGCACTT  
CCTGATGTGTGCCGACGAGAAGCAGTGGAAAGCTGGGTAAGAGGCGGGCGG  
AGAAGGACGAGATGGTGGGCGCCCACTTCATGCTGACCTTCCAGATCCCT











TCGCCCTGCTGCCGGCCATCTTTCTGATGGAGAACGTCTCAACAGAAGAG  
CTGATCAACGCCAGGCCAAGAGCAAGGAGCTGGTTGACGAAGCTATCCG  
CTGTAAGCTGAAAAATCCTGCAGAATGACGGCGTTGTTAACAGCCCGTGTG  
CTCGGCCAAGAAAAACCAGCCATGCTCTCTTTCTGCTGGGTGGGCAGACT  
TTCATGTGTGACAAGTTGTACCTGGTGGATCAAAAAGGCCAAAGAGATCAT  
CCCCAAGGCTGACATCCCCAGCCCCAGGAAAGAGTTCAGCGCCTGTGCCA  
TCGGCTGTAAGGTGTACATCACTGGTGGGA--GAGGCTC-AGAGAACGGT  
GTGTCTAAAGATGTATGGGTCTACGACACCGTCCACGAGGAATGGTCCAA  
AGCAGTCCCATGCTCATCGCCAGGTTTGGCCATGGCTCTGCAGAGCTGA  
AACACTGCCTCTACGNNNNNNNNNNNNNNNNNNNNNNNNNNNNNNNNNNNNNNNNNNNNNGGATG  
ATTACATCGTCGTGTTTCAGTCGTTCAACAA  
CGAGGCTGATACTTAACGAAGCGGAGCTGATAATGGTGTGCTGGCCAGGAG  
TTCCAGATGAGGGTGGTACAGTATCCCTGGAGGAACAGTCTTTCCCCAG  
TATCATCCAGGTGATCAGCGGGCTTCCATGTTAGTCAGCATGCATGGAG  
CTCAGTCTATCACCTCACTCTTCCCTCCCAGAGGAGCTGTTGTGGTGGAG  
CTGTTCCCCTTTGCTGTGAACCCTGAGCAGTACACCCCATATAAAACACT  
GACCTCTCTCCCGGCATGGACCTTCACTATATCTCCTGGAGGAACACTA  
AGGAGGAAAACACTATCACCCACCCAGACAGAGCCTGGGAACAAGGAGGC  
ATTGCTCACTTGGAGAAGGAAGAGCGGGAGCGAATACTGGCCAGTAAGGA  
CGTACCAGGCACCTGTGCTGCCGCAACCCAGAGTGGCTCTTCAGGATCT  
ACCAGGACACTTTGGTGGACATTCCCTTCCTTCCCTGGAAGTCCTCAA--G  
GAGGGTATGAAG---ACCAAGCCCAGCTTTAAGAA---GTCAAAGCCAGC  
GAGCATAGTCCACCCAGGCCGAGTCAGAGAACCTCAGTGTGACACCTCAG  
TACAAACCTCTAATGAGGCTAAGCTCACAGTTTCCCTGGCAGATCCCCTGG  
AATCTGAAATACCTGAAAGTAAGAGAGGTCAAATACGAAGTGNNNNNNNNNAAAAAAGA  
CACCAGCAAGGGGACACTAGAGGATCAAATCATCCAGGCGAACCCCTGCGC  
TGGAGGCATTTGGCAACGCCAAAACACTAAGAAACGACAACCTCATCTCGT  
TTTGGAAAATTCAATTGCAATTCACTTTGGTACAAGTGGCAAACCTGTCATC  
TGCTGACATAGAGACATACCTGCTGGAGAAGTCACGTGTACCTTTCAGC  
TCAAGGCTGAGAGAACTACCACATCTTCTACCAAATCCTGTCCAATCAG  
AAGCCAGAGCTGCTGGACATGCTGCTGATCACCAACAACCCATACGACTA  
CTCCTACATCTCCAAGGAGAGGTAACAGTCGCCTCAATCAACGACTCAG  
AGGAGCTGATGGCCACTGACAGTGCCTTTGATGTGCTCGGGTTCACTCCA  
GAGGAGAAGATGGGTGTCTACAAACTGACCGGTCCATCATGCACTATGG  
CAACATGAAGTTCAAACAGAAGCAGCGTGAGGAGCAGGCTGAACCTGATG  
GGACGGAGGCTGCTGATAAATCAGCTTATCTGATGGGACTAAACTCTGCT  
GACCTCATCAAAGGCCTGTGCCACCCAGAGTCAAGGTAGGAAATGAGTA  
TGTCACCAAAGGCCAAAGTGTGATCAAGTCTACTACNNNNNNNNNNNNNNNNNNNNNNNNNNNNNNNNNNNN  
NGGAAGCACTACAA  
CACCAAGCTGGGATACAAGCGCCATGTGGCGATGCACTCGGCCACGGCGG  
GCGATCTCACCTGCAAAGTGTGCATGCAGAGCTACGAGAGCACGCCCGTT  
CTCCTGGAGCACCTCAAGAGCCACTCCGGGAAGTCGTCCGGCGGGCGCCAA  
GGAGAAGAAACACCCGTGCGACCCTGCGACCAGCGTTTCTACACGCGGA  
AGGACGTGAGACGGCACATGGTGGTCCACACGGGCCGGAAGGACTTCCTG  
TGCCAGTACTGCGCCAACGCTTTGGCAGGAAGGACCACCTGACGCGCCA  
CGTGAAGAAGAGCCACTCGCAGGAGCTGCTGAAGATCAAGACGGAGCCTC  
CGGACATGTTGGGTCTTTTGGCTTCGGGGTCGCCGCCTTGTTCTGTGAAG  
GAGGAGCTCAGCCCCATGATGTGCAGCATGGGTCCCAACAAAGACCCCAT  
GATGGGCAAACCGTTCCCCAGCGGGGCCCTTTTCCCATGGGCATGTACA  
ACCCCCACCAT-----CTCCAGGCCATGTCCAACACCGGGGTGGGTAC  
CCC-----CACCCGTCCTGATGCCCGGGTCCCTGTCTGCAGCTATGGG  
CATGGGCAGTCANNNNNNN-----

-----  
-----  
-----  
-----  
-----  
-----  
-----  
-----  
-----  
-----  
-----

NNNNNNNNNNNNNNNNNNNNNNNNNNNNNNNNNNNNNNNNNNNNNNNNNNNNNNNTCTTGCAGTGTTGGCATAATTA  
AT

GGGCTCTCTGGATGGGCTTCCTCAGTGGATGACGCCCTGCTGACACAAT  
CACTCGCCGGTTTTCGCTATGATGTGGCGCTGGTGTTCGGCATTAAAGGATC  
TGGAGGAGGACATCATGGAGGGCTGAGAGAGACCGGAATGGAAGACAGC  
GCTTGCACCACAGGCTTTAGCGTCATGATCAAGGAATGCTGCGATGGCAT  
GGGTGACGTCAGCGAGAAGCACGGTGGAGGACCAGCTGTTCTGAGAAGG  
CTGTACGCTTCTTTTACAATTATGTCTATTTCTATCCTGGCAGAGGGT  
GAGGAG-----AAGGAGGTTGCCAT  
CTTCACAGAGCCAAAGCCTAACTCAGAACTGTCTGTAAGCCCTTTGCC  
TGATGTTTGTGATGAGTTCAGACCATGAGACGCTCACAGCCGTCCTGGGG  
CCCATAGCTGCAGAGCGTGGAGCCATGAAAGAGAGCAGGCTCATCCTGTC  
CGTGGGCGGCTGCCCTCGATCCTTCCGCTTTTATTTCAGAGGTACAGGAT  
ACGATGAGAAGATGGTGGAGAGATGGAAGGCCTGGAGTTCCTCAGGGTCC  
ACATATGTCTGCACTCTGTGTGACTCCAGTTCGGGCAGAGGCCTCTCAAAA  
CATGGTGCTTCACTCCATCACCCGCAGTCATGAAGAGAACCTCGAACGTT  
ACGAAATATGGAGAACCAACCCCTTCTGTGAGTCTGTAGACGAGCTGCGA  
GATAGAGTCAAAGGGTCTCTGCTAAGCCCTTCTTGAAACCCAGCCCAT  
GTTAGATGCATTACACTGTGACATGGCAATGCCACTGAGTTCTATAAAA  
TCTTCCAGGACGAGATTGGGGAGGTGTACCAAAAAGGC---CAAC---CCC  
AGCCGCGAGGAACGGCGAGCTGGAGGGCAGTCCCTAGATAAACAGCTGAG  
GAAGAAGATGAAGCTTAAACCAGTGTGAGGATGAATGGAAACTATGCC  
GCAAGCTAATGACCTGGAAGCTGTGGAGGTGGTGTGCGAGCTGGTGGCC  
TCAGAGGAGAGGAGGGAGGCCCTGAGGGAGCTCATGAGGCTCTACCTCCA  
GATGAGGCCCGTGTGGCGGCCACCTGCCAGCCAAGGAATGCCCCGACC  
AGCTGTGCCGCTACAGCTTTAACTCCCAGCGCTTTGCCGACCTCCTCTCC  
TCTACCTTCAAATACAGGTACAATGGAAAGATAACCAATTACCTTCACAA  
GACCTGGCACATGTACCTGAACNNNNNNNNNNNNNNNNNNNNNNNNNNNNNNNN  
NNNNNNNNNNNNNNNNNNNNNNNNNNNNNNNNNNNNNNNNNNNNNNNNNNNNNN

NNNNNNNNNNNNNNNNNNNNNNNNNNNNNNNNNNNNNNNNNNNNNNNNNNNNNN  
NNNNNNNNNNNNNNNGCATAACCATCGAGATGGGGACCGTG  
GGGCCCCGGTGAAGGAGAACCACAGCCCTTCTCCTGCTCCATTGAAGA  
CCCCACAAAACAGACAAAGTTCAAGGGCATTCAAGACCTACATTTCATACC  
GGGTACGCGAGCCACACGGGGCGTCCCGTCTACAGGCGTTACAAACAC  
TTTACTGGTGTACAACCGCTTGTGCACAAGTCACTGTGATCTCCGT  
GCCTCACCTGCCTGAGAAGCAGGCGAGGGGCGATTTGAGGAAGACTTCA  
TCGAGAAGCGAAAGAGACGGCTGATACTGTGGATGAACCACATGACCAGT  
CACCAGTCTCTCCAGTACGAAGGCTTTGAACACTTTCTGATGTGCGC  
TGACGACAAGCAGTGGAACTGGGAAAGAGGGCGGGGCGGAGAAGGATGAGA  
TGGTGGGGCGCCATTTATGCTGACCCTCCAGATCCCCAACGAGCACCAG  
GACCTTCAGGACGTGGAGGAGCGGGTGGACTCCTTCAAATCCTTCGCWAA  
AAAAATGGATGACAGCGTGTATGCAGCTCACGCATGTCGCTCAGAGCTGG





NNNNNNNNNNNNNNNNNNNNNNNNNNNNNNNNNNNNNNNNNNNNNNNNNNNNNNNNNNNN

>Menticirrhus littoralis

-----  
-----  
-----  
-----  
-----  
-----  
-----  
-----  
-----  
-----  
-----  
-----  
-----  
-----  
-----

-----TTCTAGAGCGAAACCTTCACCCCTTCTAACTGCCTTGG  
CATGTTGTTGCTGTCTGACGCCACCAGTGCACCAAGCTGTCAGAGCTTT  
CCTGGGGCATGTGCCCTCAGCAACTTCCCCGCTATTTGCAAGACAGAGGAC  
TTCTTCCAAGTCCCCAAAGATATGGTGGTGCAGCTTTTGTTCGCATGAGGA  
GCTAGAGACAGAAGATGAGAGACTGGTGTATGAAGCTGCCCTCAACTGGA  
TCAACTATGACTTGAAAAGAGACACTGTCACCTGCCAGAGCTCCTGAGA  
ACGGTCCGTCTGGCCTTGCTGCCTGCCATCTTTCTCATGGAGAACGTATC  
TACGGAAGAGCTGATCAATGCCAGGCCAAGAGCAAGGAGCTGGTGGACG  
AAGCTATCCGCTGTAAGCTGAAGATCCTGCAGAATGATGGTGTGTAAC  
AGCCCGTGTGCTCGACCAAGAAAACCAGCCACGCGCTCTTTCTTCTGGG  
AGGGCAGACTTTCATGTGCGACAAGTTGTACCTGGTGGACCAGAAAGCCA  
AAGAGATCATCCCCAAAGCTGACATTTCCAGCCCCAGGAAGGAGTTCAGC  
GCCTGCGCCATCGGCTGTAAAGTGTACATCACTGGTGGAA--GAGGCTC-  
AGAGAACGGTGTGTCCAAGACGTGTGGGTCTATGACACTGTCCACGAGG  
AATGGTGAAGGCGGCACCCATGCTCATCGCCAGGTTCCGGCCATGGCTCT  
GCAGAGCTGAAACACTGCCTCTACGTGGTAGGAGGTCACACCCGAGCAAC  
TGGCTGCCTCCCCGGCCTCCCCGCTCTGGATGAATACATTGTTGTGTTAGT  
CGTTCAACAACAAGGTTGGTACTGAATGAAGCAGAGTTAATCATGGCACT  
GGCCAGGAGTTCCAGATGAGAGTGGTGCAGTATCACTGGAGGAACAGT  
CTTTCCCAGTATTGTCAGGTGATCAGCAGTGCTACCATGTTAGTCAGT  
ATGCATGGAGCTCAGTTGATCACCTCACTGTTCCCTCCCAGAGGAGCTGT  
CGTGGTGGAGCTGTTCCCTTTGCTGTGAACCCAGAACAGTACACCCCAT  
ATAAAACCCTTGCCCTCCCTTCCAGGCATGGACCTCCATTATATCTCCTGG  
AGGAACACGAAAGAGGAGAACACCATCACCCACCAGACAGACCCTGGGA  
ACAAGGGGGCATTGCTCACTTGGAGAAGGAGGAGCAAGAGCGAATATTGT  
CGAGCAAAGATGTCCAAGGCACCTGTGCTGCCGCAACCCTGAGTGGCTC  
TTTCGGATCTACCAGGACACCTTGGTGGACATCCCTTCTTTTCTGGAAGT  
CCTGAA---AGAGGGCATGAAG---ACAAAGCCCAGCTTTAAGAA---GT  
CAAAGCCGGCCAGTACAGTCCATCCAGGCCGGGTGAGAGAACCCCATTTGT  
CAGACCTCAGTACAAACACTAATGAAGCTAAACTCACAGTCTCCTGGCA  
GATCCCATGGAATCTGAAATACCTGAAGGTGAGAGGTTAAAATACGAGG  
TGTGGATCCAGAAGAAAGACACCAGCAAGGGAACACTGGAGGATCAAATC  
ATCCAGGCCAACCCGGCGCTGGAGGCGTTTGGCAACGCCAAAACACTGAG  
AAATGACAACCTCGTCTCGTTTTGGAAAATTCATCCGAATTCACTTCGGTA  
CGAGTGAAAGCTGTCATCTGCTGACATTGAGACGTACCTGCTGGAGAAG

TCACGTGTCACCTTTCAGCTCAAAGCTGAGAGGAACTACCACATCTTCTA  
CCAGATCCTGTCCAATCAGAAGCCAGAAGCTGCTGGACATGCTGCTGATCA  
CCAACAACCCGTACGACTACTCCTACATCTCCCAAGGAGAGGTGACGGTC  
GCCTCCATCAACGACTCAGAGGAGCTGATGGCCACCGATAGCGCCTTCGA  
TGTGCTTGGCTTCACTCCAGATGAGAAGCTGGGCGTCTATAAATGACGG  
GCGCCATCATGCACTACGGCAACATGAAGTTCAAAACAGAAGCAGCGTGAG  
GAGCAGGCTGAGCCAGACAGCACGGAGGCTGCAGATAAATCTGCTTATCT  
AATGGGGCTGAACTCTGCTGACCTCATCAAAGGGCTGTGCCATCCCAGAG  
TAAAGGTAGGAAATGAATATGTGACCAAAGGCCAAAGTGTGGACCAGGTC  
TACTATCCCAACAAGGAGGCCTTCAAGTGTGAAGAGTGTGGGAAGCATTA  
CAACACCAAGCTGGGATATAAGCGCCATGTAGCCATGCACTCTGCAACGG  
CAGGGGATCTCACCTGCAAAGTGTGCATGCAGACCTACGAGAGCACACCT  
GTGCTCTTGGAGCACCTCAAGAGCCACTCTGGGAAGTCTTCAGGTGGCAC  
CAAGGAGAAAAAACACCCATGTGACCACTGTGACCGTCGCTTCTACACAC  
GAAAGGATGTGAGACGGCACATGGTGGTCCACACGGGCGGAAAAAGACTTC  
CTGTGCCAGTACTGTGCCAACGCTTCGGCAGGAAGGACCATCTGACACG  
CCATGTGAAGAAGAGCCACTCACAGGAGCTGCTAAAGATCAAGACAGAGC  
CTCCTGATATGTTAGGTCTTTTAGCTTCCGGGTCACCACCCTGCTCTGTG  
AAGGAGGAGCTCAGCCCCATGATGTGCGGTATGGGTCCCAACAAAGACCC  
CATGATGGGAAAAACCATTTCCAGTGGGGCCCTTTTCCAATGGGCATGT  
ACAACCCCCACCAT-----CTCCAGGCCATGTCCAATTCTGGGGTGAGT  
CACCCA-----CACCTTCCCTGATGCCAGTTCCTTATCTGCAGCTAT  
GGGCATAGGCTGTCACATGGAATATCTCATCTACGCATCTTTTTTCATTCA  
TGGGATGTTTACAAATTAGTGATGGATCAAATATTGTGAATCTGCTGGCT  
AGTAACTCTCCGAGTGTTCCTATGCTCTGACCCAGCAAAAATACTTCAG  
TAACTACAGTCCCGTGATTGGGTTTTACATTTATGAGCCTATTGAGTACT  
GGAACTCAACGGTGCAGGAGCACCTGAAGACTCTGAGTCATGGCTTCAAC  
AAGATCTCCTGGATGGACAACCTTTTCCACTACTTACGGGTAGTGAATGT  
GAGTGCCTCAACCAAGGGTGACTTCATCACCATCCTCAAGGGCTCCTTCC  
TGCGCAGCCCGGAGTACCAGCACTTCACTGAGGACATCATATTCTCCAAG  
A---ACCGTGAGACTG-----ATGAGTATGACATTATCGCCTCACGGAT  
GTACTTGGTGGCACGGACGACAGAGAAAAAGCGAGAAGAGGTGGTGGAGC  
TTCTTGAAAAGCTTCGTCCATTGATGCTAATCAACAGCATCAAATTCATT  
GCCTTCAATCCTACGTTTGTGTTTATGGACCGCTACAGCTCTTCTGTCAT  
CTCGCCATCCTGACCTCAGGATTCAGCGTACTCACAATCCTCATCCTCA  
CTTCTTCTTGGTCATCAACCCCTTGGGTAACCTTCTGGCTCATTCTCACT  
GTAACGTCCTGGAGCTGGGCGTCTTGGGTTTGTGAGGCTTTCACCAGTT  
TGAATGGCAGCCAGCTCTCAAGAATGTGTCTACATCTTGCAATGTTGGCA  
TTATTAATGGGCTCGCTGGATGGGTTTCCTCAGTGGATGATTCCCAGCT  
GACACCATCACTCGGCGGTTTCGCTATGATGTGGCACTTGTGTGGCATT  
AAAGGACCTGGAGGAGGACATCATGGAGGGGCTGAAAGAGAGTGGGATGG  
AAGACAGTGTGACCTCAGGCTTCAGTGTGATGATCAAAGAATCTTGT  
GATGGCATGGGCGATGTCAGTGAGAAGCATGGTGGAGGACCAGTTGTTCC  
CGAGAAGGCTGTACGTTTCTCTTTCACTATTATGTCTGTCTCTGTCTAG  
CAGACGAGAAGGAG-----GAAGAG  
GTTACCATCTTACGGAGCCAAAGCCAAACTCAGAATCTCCTGTAAGCC  
CCTTTGCCTGACATTTGTAGATGAGTCAGACCATGAGACACTCACAGCCA  
TCCTGTGGCCTATTGTTGCAGAGCGTAACGCAATGAAAGAAAGTAGGCTT  
ATCCTACCCATAGGTGGACTACCTCGCTCCTTCCGCTTTCACTTCAGAGG  
CACGGGTTATGATGAGAAGATGGTGCCTGAGATGGAGGGCCTCGAAGCCT  
CAGGGTCCACCTACATCTGCACTCTTGTGACTCCAGTCGGGCAGAGGCC  
TCTCAAACATGGTGTACACTCTGTACCCCGCAGTCATGAAGAGAATTT  
AGACCGTTACGAAATATGGCGAACCAACCCCTTTTCTGAGTCTGTAGAGG

AGCTGCGAGAAAGAGTCAAAGGGGTTTCTGCCAAGCCTTTCATGGAAACA  
CACCCACACTGGATGCATTACACTGTGACATAGGCAATGCCACTGAGTT  
CTACAAAATCTTCCAGGATGAGATCGGGGAGGTGTATGAAAAGGT---CA  
AC---CCCAGTCGGGAGGAGCGGCGCAGCTGGAGGGCAGCCCTAGATAAA  
CAGCTGAGAAACAAGATGAAGCTTAAACCGTAATGAGGATGAATGGGAA  
CTATGCCCCGAAGCTAATGACCATGGAGGCTGTGGAGGTAGTGTGTGAGC  
TGGTGCCCTCAGAGGAGAGGAGGGAGGCCCTGAGGGAGCTTATGAGGCTC  
TACTTGCAGATGAAGCCTGTGTGGCGTGCCACCTGCCAGCCAAGGAGTG  
CCCTGACCAGCTGTGCCGCTACAGTTTTAACTCCCAGCGCTTTGCCGACC  
TCCTCTCCTCTGCCTTTAAATATAGGTACAATGGAAAGATAACCAATTAC  
CTGCACAAGACCCTGGCCCATGTGCCAGAAATCATAGAGAGAGATGGATC  
TATAGGAGCCTGGGCCAGCGAGGGGAATGAGTCTGCAAACAAATCATACA  
CCATCGAGATGGGTCCCATGGGGCCCAGGTGGAAGGAGAGCCACAACCT  
TTCTCCTGCTCCATCGAAGACCCAACCAACAGACAAAGTTCAAGGGCAT  
CAAGACGTACATATCGTACC CGCTCACACCGAGCCACACAGAGCATCCTG  
TCTACAGGCGCTACAAACACTTTGACTGGCTGTACAACCGCTTACTGCAC  
AAGTTCACTGTGATCTCTGTGCCTCACCTGCCTGAGAAGCAGGCCACAGG  
GCGATTTGAGGAAGACTTCATCGAGAAGCGCAAAAAGACGACTTATACTGT  
GGATGAACCACATGACCAGTCACCTGTCTCTCCAGTATGAAGGCTTC  
GAGCACTTTCTGATGTGTGCTGATGACAAACAGTGGAACCTGGGCAAGAG  
ACGGGCGGAGAAGGACGAGATGGTGGGCGCCATTTTCATGCTGACCCTGC  
AGATCCCTAATGAACACCAGGACCTTCAGGATGTAGAGGAGCGGATCGAC  
TCCTTCAAGTCCTTTGCTAAGAAGATGGATGACAGCGTGATGCAGCTCAC  
ACATGTTGCCTCAGAGCTGGTGCCTAAGCACCTGGGTGGTTTTCAGGAAGG  
AGTTCCAGCGACTGGGGAATGCCTTCCAGTCTGTAAGCCAGGCATTATG  
CTGGACCCACCCACAGCTCAGAGACCTTCAACAACGCCATCTCCCAT--  
-----ACGTTCTTCAAACCTGACCTCTCTGGGTTTCATCATTGGAGTCG  
GTGTGGTTGAAACCTCCTGATCTCCATCCTGCTGGTCAAAGACAAGAGC  
CTGCACCGAGCGCCCTACTATTTCTGCTGGACCTGTGCGCCTCCGATAT  
CCTGCGCTCAGCCATCTGCTTCCCTTTGTCTTACCTCCGTCAAGAATG  
GATCTGCCTGGACCTATGGCAGCTGACCTGCAAAGTGATCGCCTTTCTC  
GGTGTGCTCTCCTGTTTCCACACAGCGTTTATGCTGTTCTGTGTCAGTGT  
CACACGCTACCTGGCCATCGCGCATCATCGTTTCTACACCAAGAGGCTGA  
CCTTCTGGACCTGTCTAGCTGTCTGCATGGTGTGGACGTTGTGTCAGTG  
GCTATGGCATTCCCGCCGGTGTGATGTAGGGACGTACTCTTTTATCCG  
GGAGGAGGACCAGTGACATTCCAGCACCGTTCCCTCAGGGCGAATGATT  
CGCTGGGCTTTCATGCTCCTGCTGGCGCTCATCCTCCTGGCCACACAGCTG  
GTTTACCTCAAGCTCATCTTCTTTGTCCACGACCGTCGAAAGATGAAGCC  
TGTCCAGTTCGTGCCTGCTGTGAGCCAGAACTGGACCTTTCACGGGCCAG  
GCGCCAGCGGGCAGGCGGCGGCAACTGGCTGGCTGGATTTGGTCGAGGC  
CCCACCCCGCCTACTTTGCTGGGCATCCGGCAGAACAGCAACGCAGCAGG  
CCGCAGGCGTCTACTGGTGTGGATGAATTCAAAAACAGAGAAGAGGATTA  
GTAGGATGTTCTACATCATGACGTTTTTCTTCTTGGCACTGTGGGGCCA  
TATCTGGTGCCTGCTACTGGCGGGTGTGTTGCAAGGGGCCCGTGGTCCC  
CGGGGGCTACCTGACGGCAGCCGTGTGGATGAGCTTTGCCAGGCTGGGG  
TCAATCCTTTCATCTGCATC-----GCCAAATCTCGCTTT  
CACCTGGCATGGGGACTGGTCCCTGGCACGGAGC---GCAGCGTCCCACT  
CGGCAACAGCTTGCTATCCCCGAGCAAACCGAGGAGCCCACTGTTGCCA  
CCCCCCGCGAGCGATGGTTTTGTACCC---CTGCCAACAACCGACTGGAC  
TTTGCTGCCTCGGCATACGACGCCGCT-----GATTTCCGGGTAA  
CGCGGCCACCTTGCTGTCTACGCAGCGGCCGGAGTGAAGGCTC-----  
TTCCCTGCCGACTGCAGGCTGCTCCAACCGGCTCTTGGCTATTACGCA  
GACCCGTCAG---GCTGG---GGAGGACGCACGCCCGCCGAGTACTGTGG













GTGCTTGGCTTCACTCCAGAGGAGAAGATGGGGATCTATAAGTTGACAGG  
TGCCATTATGCACTATGGCAACATGAAGTTC AAGCAGAAGCAGCGTGAGG  
AGCAGGCAGAGCCTGATGGCACTGAGGCAGCTGACAAGTCAGCTACCTG  
ATGGGGCTTAACTCTGCTGATCTTGTGAAGGGACTCTGCCATCCCAGGGT  
CAAAGTCGGCAATGAGTATGTAACAAAGGGACAAGGTGTAGATCAAGTCT  
ATTACCCCAACAAGGAGGCCTTCAAGTGCAGAGGAGTGC GAAAGCACTAC  
AACACCAAGCTGGGCTACAAGCGGCACGTGGCCATGCACTCGGCCACGGC  
GGGCGACCTCACCTGCAAGGTGTGCCGTGCAGAGCTACGAGAGCACGCCGG  
CGCTGCTGGAGCACCTCAAGAGCCACTCGGGCAAGTCGTGGGGCGGCGCC  
AAGGAGAAGAAGCACCCGTGCGACCACTGCGACCGCGCTTCTACACGCG  
CAAGGACGTGCGCCGCCACATGGTGGTGCACACGGGCCGCAAGGACTTCC  
TGTGCCAGTACTGCGCGCAGCGCTTCGGCCGCAAGGACCACCTGACGCGC  
CACGTCAAGAAGAGCCACTCGCAGGAGCTGCTGAAGATCAAGACGGAACC  
TCCGGACATGCTGGGCCTGCTGGGGCTCGGGCTCGCCGCCCTGCGCCATCA  
AGGAGGAGCTCAGCCCCATGATGTGCAGCATGGGCCCCGCAAGGACCCC  
ATGATGGCCAAGCCCTTCCCCAGCGGCACCCCTTCCCCATGGGCATGTA  
CAACCCCCACCAC-----CTCCAGGCCATGTCCAACCCCGGAGTGGGCC  
AC-----CACCCTCCCTGGTGCCC GGCTCCCTGTTCGGCCGCCATG  
GGGATGGGCTGCCACATGGAG-----

-----  
-----  
-----  
-----  
-----  
-----  
-----  
-----  
-----  
-----  
-----  
-----  
-----  
-----  
-----  
-----  
-----  
-----

-----TTCAGTGTGACGATCAAGGAGTCCTGCG  
ACGGCATGGGGGACATCAGGGAGAAACAGGCGGTGGGCCGCCCGTCCCA  
GAGAAGGCCGTGCGCTTCTCCATCACCGTCATGTCTGTCTCCGTCCAGGC  
CGAAGGAGAGGAG-----GAGGCGG  
TCACCATCTTCCGGGAGTCCAAGCCCAACTCTGAACTGACCTGTAAGCCA  
CTGTGCTTGATGCTGGTGGACGAGTCGGACCACGAGACCCTCACGGCAGT  
CCTGGGGCCTCTGGTGGCCGAGAGGAACGCCATGAAGCACAGCCGGCTCA  
TCCTGTCCCTGGGCGGGCTCCCTCGTCCATCCGCTTCCACTTCCAGAGGA  
ACGGGTTATGACGAGAAGATGGTGCGGGACATGGAGGGCCTGGAAGGCTC  
CGGCTCCACCTATATCTGCACCTTGTGCGACTCCACCAGGGCAGAGGCCT  
CCCACAACATGGTGTCCACTCCATCACCCGCAGCCACGACGAAAACCTG  
GAGCGCTACGAGCTGTGGAGGACCAACCCCTTCTCGGAGTCCGCAGAGGA  
GCTGCGAGACCGGGTCAAAGGTGTCTCGGCTAAGCCCTTCATGGAGACAC  
AGCCCACTGGACGCCCTGCACTGCGACATTGGCAATGCTACGGAGTTC  
TACAAGATCTTCCAGGATGAGATCGGGGAGGTGTACCGCAGCCC---CAA  
C---CCCAGGCAGAGGAGCGACGGGGTGGAGGGCCGCTCTGGACAAGC



-----  
-----  
-----  
-----GAGAAGTGGCTTTGGGGA  
TAAATCCGTTTCGCCGACGGGATGGGCGCTTTCAAAATCAACCACAGCTCC  
CACGATATTGGCTCTGG---TCAAACGGCGTTTGCCTCGCAGGCG---CC  
CGGCTAC---GCAGCCGCTGCCCTGGGA---CACCATCA-----CCACC  
CAACCCATGTCAGCTCC---TACTCCACCGCGGGCGTTCAACTCCACCCGG  
GACTTTCTCTTTTCGGAATCGGGGATTCGGAGACGCCACTAG-----  
---CGCGCAGCACAGTCTCTTCGCCTCAGC---TGCGGGAAGTTT---C-  
-----GCTGGGCCACATGGACACACCGATGCCACGGGACACCTGCTCTTC  
TCGGGACTGCACGAG---CAAGCGGCGACCCACGCGTCTTCGAACGTGGT  
GAACAGTCAGATGCGCCTGGGCTTTTCGGGGGACATGTACGGCAGAGCCG  
AGCAGTATGGTACGTAACGAGCCCCCGGT---CCGAGCACTACGCTTCG  
ACTCAGTTGCACGGCTACGGCCCCATGAACATGAATATGGCTGCC---CA  
CCACGGGGCAGGGGCCCTTCTTCCGTTACATGAGGCAGCCGATCAAACAAG  
AGCTCATCTGCAAGTGGGTGCAACCAGAGCAGCTGTCGAATCCGAAAAAG  
TCCTGCAACAAAACCTTTCAGCACGATGCATGAGCTCGTGACCCACCTCAC  
AGTGGAACATGTTCGGGGGACCGGAACAGTCGAATCACATTTGCTTTTGGG  
AAGAGTGTCCGCGAGAAGGGAAACCATTTAAAGCCA-----  
-----

>Mola mola

AGCCTACTCATTTCGAGCGGAACTAAGTCAACCTGGTGTCTTCTTTGGAGA  
CGACCAAATTTACAATGTCATCGTCACAGCACATGCATTTGTAATAATTT  
TCTTTATAGTAATACCAATTATGATTGGGGGCTTCGAAACTGACTGGTC  
CCTCTTATGATCGGGGCCCGATATGGCCTTCCCCCGAATGAACAATAT  
AAGCTTTTACTCTTGCCCCATCTTTTCTTCTACTTCTTGCCCTCCTCAG  
GCGTCGAAGCAGGTGCCGGAACAGGATGAACTGTATACCCCCCTTTAGCC  
GGAAACTTAGCCCATGCAGGCGCCTCTGTTGATTTAACAATCTTTTCCCT  
TCACCTAGCCGGCATCTCCTCAATTCAGGGGCCATTAATTTTATCACAA  
CGATCATTAACATGAAACCGCCTGCGATTTTACAATAACCAGACCCCCCTG  
TTTGTATGGGCGGTCCTCATTACAGCAGTACTTCTTCTCCTCTCGCTTCC  
AGTCTTGCAGCTGGGATTACGATGCTTCTTACAGATCGAAACCTTAACA  
CCACTTTCTTCGACCCGGCAGGCGGAGGAGATCCAATTCATATCAACAT  
CTCTTCT-----  
-----

-----  
-----TTTCTAGAGAGAAACCTTCACCCATCTAACTGCCTTGG  
CATGCTGCTGCTATCCGACGCCCACCAGTGCACCAAGCTGTCAGAGCTCT  
CCTGGGGCATGTGCCTCAGCAACTTCCCCGCTATTTGTAAGACAGAGGAC  
TTCTCCAACCTGCCAAAGATATGGTGGTGCAGCTTTTGTCCCATGAGGA  
GCTAGAGACTGAAGATGAGAGACTGGTGTATGAAGCTGCCCTCAATTGGA  
TCAACTATGACCTAGAAAAGAGGCAC TGCCACCTTCCAGAGCTCCTGAGA  
ACGGTCCGTCTGGCCCTTCTGCCCGCCATTTTCTCATGGAAAACGTCTC  
TACAGAAGAGCTGATCAACGCCAGGCCAAGAGCAAAGAGCTGGTGGACG  
AGGCTATCCGCTGCAAGCTGAAGATCCTGCAGAAATGATGGTGTGGTGAAC  
AACCCATGTGCGCGTCCCAGAAAAACCAGCCATGCCCTCTTTCTTCTTGG  
CGGGCAGACTTTCATGTGTGACAAGTTGTACCTGGTGGACCAGAAAAGCCA  
AAGAAATCATCCCCAAGGCTGACATCCCCAGCCCCAGGAAGGAGTTCAGT  
GCCTGTGCCATTGGCTGCAAGGTGTACATCACAGGTGGGA--GAGGCTC-  
AGAGAATGGTGTGTCCAAAGACGTGTGGGTCTACGACACCGTCCACGAGG

AATGGTCAAAGGCGGCCCATGCTTATCGCCCCGTTTGGCCATGGCTCT  
GCGGAGCTGAAACACTGCCTCTACGTGGTCGGAGGCCACACTGCAGCAAC  
CGGTTGCCTCCCAGCCTCTCCTTCTGGACAACACTACATTGTTGTGTTTAGT  
CGTTCCACCACAAGGCTGATACTGAATGAAGCAGAGCTAATTATGGCGCT  
GGCCAGGAGTTCCAGATGAGAGTGGTCACAGTATCTCTGGAGGAACATT  
CTTTCCCCAGTATTGTCCAAGTGATAAGCAGTGCTACTATGTTAATCAGT  
ATGCATGGAGCTCAGCTTATTACCTCACTGTTCCCTCCCTCGAGGAGCTGT  
TGTGGTTGAGCTATTCCCCTTTGCTGTGAACCCGGAGCAATATACTCCAT  
ATAAAAACCTTGCCTTCCTTCCAGGCATGGACCTACACTATATCTCATGG  
AGGAACAATAAAGAACAGAACACCATCACCCACCCACAGAGACCCTGGGA  
ACAAGGGGGCATCATACTTAGAGAAGGAGGAACAAAAGCGAATACTTA  
CTAGCAAAGATGTTCCAGACACCTGTGCTGCCGCAACCCAGAGTGGCTA  
TTCCGGATCTACCAGGACACTTTGGTGGATATCCCCTCCTTCCCTGGACAT  
CCTCAA---AGAAGGCTTAAAG---ACGAAGCCTAGTTTGAAGAA---GT  
TAAAACCAGCAAGCGCACTCCACCCTGGCCGGGTCAGAGAACCCTCAGTGT  
CAGACTTCAGTACAAACCAGTAATGAGGCTAGACTCACAGTCTCCTGGCA  
GATTCCCTTGGAAATCTCAAGTACCTGAAGGTGAGAGAAGTAAAATATGAAG  
TGTGGATCCAGAAGAAGGACACAAGCAAGGGGACGCTGGAGGATCAAATC  
ATCCAGGCGAACCCCTGCCTGGAAGCCTTCGGTAATGCCAAAACATTGAG  
AAATGACAACCTCGTCTCGTTTTGGAAAATTCATCCGAATTCACTTTGGTA  
CGAGTGGCAAGCTGTCTCGTCCGCTGACATCGAGACGTACCTGCTGGAGAAG  
TCACGTGTCACCTTTCAGCTCAAGGCTGAAAGAAAATTACCACATCTTCTA  
CCAGATACTGTCCAATCACAAGCCAGAGCTACTGGACATGTTGCTGATCA  
CCAACAACCCGTACGACTACTCCTACATCTCCCAGGGAGAAGTTACGGTG  
GCCTCCATCAATGACTCAGAGGAGCTGATGGCCACCGACAGCGCCTTTGA  
CGTACTTGGCTTCACTTTCAGAGGAGAAGATGGGCGTATACAAGCTGACGG  
GCGCTATCATGCACTACGGCAACATGAAGTTCAAACAGAAGCAGCGAGAG  
GAACAGGCTGAGCCGGATGGGACGGAGGCGGGGATAAATCAGCTTACCT  
CATGGGGCTGAACTCTGCTGATCTCATCAAAGGGCTGTGCCACCCAGAG  
TCAAGGTAGGAAACGAATATGTCACCAAAGGCCAAAGTGTGGACCAAGTC  
TACTACCCCAACAAGGAGGCTTTCAGTGTGAGGAGTGTGGGAAGCACTA  
CAACACCAAGCTGGGATATAAGCGCCATGTGGCCATGCACTCTGCAACTG  
CAGGCGATCTCACATGTAAAGTGTGCATGCAGACCTACGAGAGCACACCG  
GTGCTCTTGGAGCACCTAAAGAGCCACTCTGGGAAGTCCTCAGGTGGCAC  
CAAGGAGAAAAACACCCCTGTGACCATTGTGATCGTCTGCTTCTACACAC  
GGAAGGACGTGAGACGGCACATGGTGGTCCACACAGGCCGAAAGGACTTC  
CTGTGTCAGTACTGTGCCAACGCTTTGGCAGGAAGGACCATTTGACACG  
CCATGTGAAGAAGAGCCACTCACAGGAGCTGCTGAAAATTAAGACGGAGC  
CTCCTGATATGTTAGGTCTTTTAGCTTCTGGGTACCACCCTGCTCTGTG  
AAGGAGGAGCTCAGCCCCATGATGTGTGGCATGGGTCCCAACAAGGACCC  
CATGATGGGGAAACCTTTCCCAGTGGAGCCCCATTTCAATGGGCATGT  
ATAACCCCAACCAT-----CTCCAGGCCATGTCTAATCCTGGGGTGAGT  
CACCCA-----CACCTTCCCTGATGCCAGTTCCTTGTCTGCAGCTAT  
GGGCATGAGTTGTCTCCTGGAANNNNNNNNNNNNNNNNNNNNNATTTTCATGGGGAGTTTACAGATCAGT  
G  
ATGGATCAAACATTGTGAACCTGTTGGCTAGTAACTCTCCAAGTGTTTCA  
TATGCTTTGACCCAGCAAAAATACTTCAGTAACTACAGTCCCTGTGATCGG  
GTTTTACATTTATGAGCCATTGAGTATTGGAACCTAACGGTGCAGGAGC  
ACCTGAAGACTCTGAGTAATGGCTTCAATAAGATCTCCTGGATGGACAAC  
TTTTTCCACTACCTGAGAGTAGTGAATGTGAGTGCATCAACCAAGAAGGA  
CTTCATTAACATCCTTAAGGGCTCCTTCCCTGCGCAGCCCGGAGTACCAGC  
ACTTCACTGAGGACATCATATTCTCTAAGA---ATCGTGAGACTG-----  
-ATGAATACGACATTATTGCTTCAAGGATGTACTTGGTGGCACGTATAAC

AGAAAAGAAGCGTGAAGAGGTGGTGGAGCTTCTGGAAAAGCTTCGTCCAT  
TAATGTTGATCAACAGCATCAAGTTCATTGCCTCAATCCTACATTTGTG  
TTCATGGACCGCTACAGTTCGTCCGTCATCTCACCCATCCTGACCTCAGG  
ATTCAGCGTACTCACAACTCTCATCCTCACTTTTTCTTGGTCATCAACC  
CCTTNNNNNNNNNNNNNNNNNNNNNNNNNNNNNNNNNNNNNNNNNNNNNN  
NNNNNNNNNNNNNNNNNNNNNNNNNNNNNNNNNNNNNNNNNNNNNNNNNN  
NNNNNNNNNNNNNNNNNNNNNNNNNNNNNNNNNNNNNNNNNNNNNNNNNN  
NNNNNNNNNNNNNNNNNNNNNNNNNNNNNNNNNNNNNNNNNNNNNNNNNN  
NNNNNNNNNNNNNNNNNNNNNNNNNNNNNNNNNNNNNNNNNNNNNNNNNN  
NNNNNNNNNNNNNNNNNNNNNNNNNNNNNNNNNNNNNNNNNNNNNNNNNN  
NNNNNNNNNNNNNNNNNNNNNNNNNNNNNNNNNNNNNNNNNNNNNNNNNN  
NNNNNNNNNNNNNNNNNNNNNNNNNNNNNNNNNNNNNNNNNNNNNNNNNN  
NNNNNNNNNNNNNNNNNNNNNNNNNNNNNNNNNNNNNNNNNNNNNNNNNN  
NNNNNNNNNNNNNNNNNNNNNNNNNNNNNNNNNNNNNNNNNNNNNNNNNN  
GAGAAGCACGGCGGTGGACCGGTTGTTCTGAGAAGGCAGTA  
CGTTTCTCTTTACCCTTATGTCCGTGTCTGTGCGGGCAGATGGCAAGGA  
G-----GACGAAATTACCATCTACA  
GGGAGCCAAAACCAAACCTCAGAGCTGTCCTGTAAGCCCCTTTGCCTGATG  
TTTTGTGGATGAATCAGACCACGAGATGCTCACAGCCATCCTGTGGCCCAT  
AATTGCAGAGCGTAATGCAATGAAAAGAGAGCAGACTCATCATATCCATTG  
GTGGACTGCCTCGCTCCTTCCGCTTTCACTTCCGAGGCACAGGCTATGAT  
GAGAAGATGGTGCCTGAGATGGAGGGCCTAGAGGCCTCTGGATCCACCTA  
CATCTGCACACTTTGTGATTCCGGTCGTGCAGAGGCCTCTCAAAACATGG  
TCCTACACGCCATCACACGCAGTACGAAGAGAACTTAGAGCGCTACGAA  
ATATGGAGAACCAACCCTTTTTCTGAGTCTGTAGAGGTGCTTAGAGACAG  
AGTCAAAGGGGTGTCTGCCAAGCCTTTCATGAAAACCACCCAACGCTGG  
ATGCACTCCACTGCGACATAGGCAACGCCACTGAGTTTTACAAAATTTTC  
CAGGACGAGATTGGGGAAGTCTACCAAAAGGT---CAAC---CCCAGCCG  
GGAGGAGCGCGCAGCTGGAGAGCAGCCCTTGACAAAACAGCTGAGGAAAA  
AGATGAAGCTCAGACCCGTGATGAGGATGNNNNNNNNNNNNNNNNNNNNNN  
NNNNNNNNNNNNNNNNNNNNNNNNNNNNNNNNNNNNNNNNNNNNNNNNNN  
NNNNNNNNNNNNNNNNNNNNNNNNNNNNNNNNNNNNNNNNNNNNNNNNNN  
NNNNNNNNNNNNNNNNNNNNNNNNNNNNNNNNNNNNNNNNNNNNNNNNNN  
NNNNNNNNNNNNNNNNNNNNNNNNNNNNNNNNNNNNNNNNNNNNNNNNNN  
NNNNNNNNNNNNNNNNNNNNNNNNNNNNNNNNNNNNNNNNNNNNNNNNNN  
NNNNNNNNNNNNNNNNNNNNNNNNNNNNNNNNNNNNNNNNNNNNNNNNNN  
NNNNNNNNNNNNNNNNNNNNNNNNNNNNNNNNNTCTTACACCATCGAGATGGGT  
TCCTTGGGGCCCAGATGGAAGGAGAGTCCCCAGCCTTTCTCGTGCTCCAT  
CGAAGACCCCAAAAACAGACAAAAGTTTAAGGGCATCAAGACGTACATTT  
CGTACCGGGTCACGCCGAGCCATAACGGGGCACCCCTGTCTACAGGCGTTAC  
AAACACTTTGACTGGCTGTACAACCGCTTGCTGCACAAGTTCACTGTGAT  
CTCCGTGCCCCACCTGCCTGAGAAGCAGGCCACAGGGCGATTTGAGGAGG  
ACTTCATCGAAAAGCGCAAGAGGCGACTGATACTTTGGATGAACCACATG  
ACCAGTACCCAGTCTCTCCCAGTATGAAGGCTTTGAGCACTTCTGAT  
GTGTGCCGACGACAAGCAGTGGAAGCTGGGCAAGAGGGCGCGCAGAGAAAG  
ATGAGATGGTGGGCGCGCATTTTCATGCTGACCCTTCAGATTCCCAACGAG  
CACCAAGACCTTCCAGATGTAGAGGAGCGGATTGACTCCTTCAAGTCCTT  
TGCCAAGAAAATGGACGACAGCGTGTATGAGCTCACGCATGTCACCTCAG  
AGCTGGTGGCAAAGCACCTGGGTGGGTTGAGGAAGGAGTTCCAGCGGCTG  
GGAAATGCCTTCCAGTCCATCAGCCAGGCATTTCATGCTGGACCTCCCCA  
CAGCTCAGAGGCCTTAAACAACGCCATCTCCCATNNNNNNNNCGCCGTTCTCAAACCTG  
ACCTCTCTGGGTTTTCATCATTGGAGTCCGGTGTGGTTGAAAACCTACTGAT  
CTCCATCCTGCTGGTCAAAGACAAAAGCCTGCACCCAGCGCCCTACTATT  
TCCTACTGGACCTGTGCGCCTCTGACATACTTCGGTCCGCCATCTGCTTC  
CCCTTGTCTTTACCTCGGTCAAGAATGGATCTGCCTGGACGTATAGTAC  
GCTGACCTGCAAAGTGATAGCCTTCCGGGTGTGCTCTCCTGTTTCCACA  
CGGCGTTCATGCTGTTCTGCGTCAGTGTACGCGCTATCTGGCCATCGCA  
CATCACCGTTTCTACACCAAGAGGCTGACCTTCTGGACCTGTCTAGCTGT  
CATCTGCATGGTGTGGACGTTATCAGTGGCCATGGCCTTCCCACCAGTGC  
TCGACGTAGGGACGTACTTTTTATCCATCAGGAGGACCAATGCACGTTTC



CTATCATTAATATAAAAACCTCCCGCCATTTCCCAATACCAGACCCCTCTG  
TTCGTATGGGCCGTTTAAATTACAGCAGTCCTTCTCCTCCTATCCCTCCC  
CGTACTTGCAGCCGGCATCACCATGCTCCTAACAGATCGTAACCTAAACA  
CAACCTTCTTTGATCCTGCAGGAGGAGACCCTATCCTGTATCAACAC  
CTGTTT-----  
-----  
-----

-----TTTCTAGAGAGAAACCTTCATCCATCTAACTGCCCTGGG  
CATGCTGTTGCTGTTTGTATGCACACCAGTGTACCAAGCTATCAGAGCTCT  
CCTGGGGCATGTGCCCTCAGCAACTTTCCGGCTATTTGCAAGACAGAGGAC  
TTCTCCAGCTGCCCAAAGACATGGTGGTGCAGCTTCTATCCCATGAGGA  
GCTGGAGACAGAAGATGAGAGACTGGTTTATGAAGCTGCCCTYAACTGGG  
TCAACTATGACTTGGAAGGAGGCACTGCCACCTGCCAGAGCTGCTGAGA  
ACGGTTCGCCTGGCCCTGCTACCTGCCATCTTCTCATGGAGAATGTCTC  
TACAGAAGAGCTGATCAATGCCAGGCCAAGAGCAAGGAGCTGGTGGATG  
AGGCCATCCGGTGCAGCTGAAGATCTTGCAGAAATGACGGTGTGGTTAAC  
AGCCCCTGTGCTCGGCCGAGAAAAACCAGCCATGCCCTTTTCTCTTGGG  
AGGGCAGACCTTCATGTGTGACAAGCTGTATTTGGTGGATCAGAAGGCAA  
AAGAGATCATCCCCAAGGCTGACATCCCCAGCCCTAGGAAGGAGTTCAGT  
GCCTGCGCCATCGGCTGTAAAGTCTACATCACAGGTGGCA--GAGGCTC-  
AGAAAATGGTGTGTCTAAAGATGTGTGGGTCTATGACACTGTCCATGAGG  
AATGGTCCAAGGCAGCACCCATGCTCATCGCTAGATTTGGTCATGGCTCT  
GCTGAGCTGAAACACTGCCTTTACNNNNNNNNNNNNNNNNNNNNNNNNNNNN  
NNNNNGGATGAATACATTTGTGGTGTTCAGCC

GTTCACAACAAGGCTGATTCTGAACGAAGCAGAGCTAATCATGACACTG  
GCCCAGGAATTTAGATGAGAGTGGTTACAGTCTCCCTAGAGGAACAAC  
TTTTCCCAGCATCGCCAGGTGATCAGTGGGGCCTCCATGTTAGTCAGTA  
TGCATGGAGCTCAGCTTGTACCTCACTCTTCTCCCAGAGGAGCTGCT  
GTGGTGGAGCTGTTCCCTATGCTGTCAACCCAGAACAGTACACCCATA  
TAAAACCCTCGCTCCCTACCAGGCATGGATCTTCAATATGTTTCTGGA  
GGAACACTATAGAGGAGAACACTGTCACCCACCCAGACAGACCGTGGGAA  
CAAGGAGGCATCACCCATTTGGAAAAGGACGAACAAGAGCGAATACTGGC  
CAGCAATGATGTCCCCAGACACCTGTGCTGCCGCAACCCAGAGTGGCTCT  
TCCGAATCTACCAGGACACTTTGGTGGACATCCCTTCATTCCTGGAGGTC  
CTCAA---AGAGGGCCTGAAG---ACCAGGCCAGCTTGAAGAA---GAC  
CAAGCTGGCCAGCACGGTTCACCCAGGCCGGGTGAGAGAACCCCAGTGCC  
ACACCTCAGTCCAAGCCACCAACGAGGCTAAACTCACGGTTTCTGGCAG  
ATCCCATGGAATCTGAAATACCTGAAGGTGAGAGAAGTGAAGTACGAGGT  
GTGGATCCAGAAGAAGGATACCAGCAAGGGAACACTGGAGGATCAAATCA  
TCCAGGCAAACCCTGCACTGGAGGCTTTTGGTAATGCCAAAACAGTGAGG  
AATGACAATTCATCCCGTTTTGGAAAATTCATCCGAATTCACCTTGGAAAC  
CAGTGGCAAACCTGTCTCTGCTGATATTGAAACTTACCTATTGGAGAAGT  
CACGTGTCACCTTTCAGCTCAAGTCTGAGAGGAACTACCACATCTTCTTC  
CAGATATTGTCCAATCAGAAGCCAGAGCTGTTGGACATGATGTTGATCAC  
TAACAACCCATATGACTACTCCTACATCTCCAAGGAGAGGTAACAGTAG  
CATCCATCAACGACTCAGAGGAGCTGATGGCCACTGACAGCGCTTTGAC  
GTGCTTGGCTTCACTCAAGAGGAGAAGATGGGAGTATATAAGCTGATTGG  
TGCCATTATGCACTATGGCAACATGAAGTTAAGCAGAAGCAGCGTGAGG  
AGCAGGCTGAGCCTGACGGAACAGAGGCTGCTGATAAGTCAGCATACTT  
ATGGGGCTGAACTCTGCAGACCTCATCAAAGGGCTATGCCATCCCAGAGT  
CAAGGTAGGAAATGAATATGTACCCAAAGGCCAAGGTGTAGACCAAAGTCT  
ACTACCAAACAAGGAGGCTTCAAGTGCAGGAGTGTGGCAAGCACTAC



AACACCAAGCTGGGATACAAACGCCATGTGGCCATGCACTCTGCCACAGC  
AGGGGACCTCACCTGTAAAGTGTGCATGCAGAGCTATGAGAGCACGCCGG  
TGCTCCTGGAGCACCTTAAGAGCCACTCGGGGAAGTCCTCAGGTGGCGCC  
AAGGAGAAAAAACACCCATGCGACCACTGCGACCGCCGTTTTTACACACG  
GAAGGATGTGAGACGGCACATGGTGGTCCACACGGGCCGAAAGGACTTCC  
TGTGCCAGTACTGTGCCAGCGCTTTGGCAGGAAGGACCACCTGACACGC  
CATGTAAAGAAGAGCCACTCACAAGAGCTGCTGAAGATCAAAACGGAGCC  
TCCAGATATGTTAGGTCTTTTAGGTTCTGGCTCACCGCCATGCTCTGTCA  
AGGAGGAGCTTAGCCCTATGATGTGCAGCATGGGTCCCAACAAAGACCCC  
ATGATGGGCAAACCCCTCCCCAGCGGGACCCCATCCCCATGGGTATGTA  
CAACCCCCACCAC-----CTCCAGGCCATGTCCAATTCTGGGGTGGGTC  
ACCC-----CACCCCTCCCTGATGCCTAGCTCCCTGTCTGCAGCTATG  
GGCATGGGCTGTACATGGAATATCTCATCTATGCCTCTTTCTCATTCAT  
GGGTTGTTTACAAATCAGTGATGGCTCAAACATTGTGAACTTGCTGGCTA  
GTAACTCTCCGAGCGTTTCATATGCTCTGACCCAGCAGAAATACTTCAGT  
AACTACAGTCTGTGATTGGATTTTACATTTATGAGCCATTGAGTACTG  
GAACTCCACAGTGCAGGAGCACCTGAAGACACTGAGTCATGGCTTCAACA  
AGATCTCCTGGATGGACAACCTTCTTCCACTACCTGCGGGTGGTGAACGTG  
AGCGGTGCGACCAAGAATGACTTTATCAGCATCCTCAAGGGCTCTTTCCT  
GCGCAGCCCGGAGTACCAGCACTTCACTGAGGACATCATTTTCTCCAAGA  
---ACCGTGAGAGTG-----ATGAGTATGACATTATTGCCTCGCGCATG  
TACCTAGTGGCGCGGACCACAGAGAAGAAGCGCGAGGAGGTGGTGGAGCT  
TCTGGAGAAACTGCGTCCACTGATGCTGATCAATAGCATCAAGTTCATCG  
CCTTCAACCCACCTTTGTTTTTCATGGACCGCTACAGCTCTTCAGTCATC  
TCGCCCATCCTGACCTCAGGCTTCCAGCGTCTCACCATCCTCATCCTAAC  
TTTCTTCCCTGGTCATCAACCCCTTGGGGAACCTTCTGGCTCATCCTCACAG  
TTACTTCTGTGGAGCTGGGTGTCTTGGGTTTAATGGGCTATCATCTATTT  
GAATGGCAGCCGGCCCTCAAGAATGTGTCTGCATCCTGCCATGTGGGCAT  
TATTAATGGGCTCTCTGGAGGGACTGCCTTGGTGGATGACTCCCCACCTG  
ACACCATTACTCGACGTTTTCGCTACGATGTGGCCCTGGTATCAGCCTTA  
AAGGATCTGGAGGAGCACATCATGGAGGGACTGAGAGAGTGTGGGCTGGA  
AGACAATGCTTGCACCTCAGGCTTCACTGTTATGATCAAGGAATCTTGTG  
ACGGCATGGGAGATGTCAGTGAGAAGCACGGGGAGGGCCAGTGGTCCCC  
GAGAAGGCTGTACGCTTCTTACTGTTATGTCTGTCTCTGTCTCTGGC  
AGATGGAGAGGAA-----GAGGCGG  
TTACCATCTTTAGGGAGCCAAAGCCCAACTCAGAAGTGTCTGTAAAGCCC  
CTAAGCCTGATGTTTGTGGATGAGTCAGACCATGAGACAGTCACTGCTGT  
CCTGGGACCTTTAATGTCAGAGCGTAATGCAATGAAGCAGAGTCAACTCA  
TCCTATCTATGGGTGGCCTCCCTCGCTCCTTTTCGCTTCCACTTCCAGAGCC  
ACAGGATATGATGAGAAGATGGTGCCTGAGATGGAGGGCCTGGAGGCCTC  
AGGTTCACCTATATCTGCACTCTGTGTGATTCCAGTCCGAGCAGAAGCCT  
CTCACAACATGGTTCTACATTCCATCACCCGCAACCACGATGAGAACCCTG  
GAGCGTTATGAAATATGGAGGACCAATCCCTTTTCTGAGTCTGTGAGGA  
GCTGCGAGACCGGGTCAAAGGGATCTCTGCCAAGCCCTTTATGGAGACCC  
AGCCCACTATGGATGCATTACACTGTGACATTGGTAATGCCACAGAGTTC  
TACAAAATCTTCCAGGATGAGATTGGGGAAGTGTATCAGAAGGC---CAA  
C---CCCACCCGAGAGGAACGGCGGAGCTGGCGAGCAGCCCTAGACAANCA  
NCTGAGGAAGAAGATGAAGCTTAANACAGTGATGAGGATGAATGGGAATTAT  
GCCCCGAGGCTAATGACCAAGGAGGCTGTGGAAGTGGTGTGTGAGCTGGT  
ACCTTCAGAAGAGAGGCGAGAGGTCTGAGGGAGCTTATGGGGCTCTACA  
TCCAGATGAGCCTGGTGTGGCGCGCTACCTGCCAGCCAAGGAATGCCCT  
GATGAGCTATGTCCCTACACGTTTTCACTCCCAGACATTTGCCGATCTCCT  
CTCCANTACCTTCAATAATGGAACAAAGGGAAAGATCACCAATTTCTGCA

CAAGACATTCGCACATGTCCTTGAAACTATTGTAAGANNNNNNNNNNNNNNNNNNNNNNNNNNNNNNNNNNNNNNNNNNNNNNNNNNNNNNN  
NNNNNNNNNNNNNNNNNNNTCGTACACCATTG  
AGATGGCTCCTAAGGGGCCCCAATGGAAGGAGAGTCCTCAGCCTTTCTCC  
TGCTCCATTGAAGACCCACAAAACAGACCAAGTTCAAAGGCATCAAGAC  
CTACATTTTCGTACCGGGTCACGCCGAGCCACACAGGGCGTCCCGTCTACA  
GACGCTACAAACACTTTGACTGGCTGTACAACCGCTTACTGCACAAGTTC  
ACTGTGATCTCGGTGCCCCACCTGCCGAGAAGCAGGCCACGGGGCGCTT  
CGAGGAGGACTTCATTGAGAAGCGTAAAAGACGACTGATTCTGTGGATGA  
ACCACATGACTAGTCACCCAGTCTCTCCCAGTATGAGGGGTTTGAGCAC  
TTCTTTATGTGTGCTGATGACAAGCAATGGAAGCTGGGTAAAGAGGCGGGC  
GGAGAAGGACGAGATGGTGGGCGCCACTTCATGCTGACCTTCCAGATTC  
CTAACGAGCATCAGGATCTCCAGGATGTGGAGGAGCGGGTTGACTCCTTC  
AAGTCCTTTGCTAAGAAAATGGATGACAGCGTCATGCAGCTCACACATGT  
TGCTCGGAGCTGGTGCCTAAGCACCTGGGTGGATTCCAGGAAGGAGTTCC  
AGCGGCTAGGAAATGCCCTTCCAGTCTATCAGCCAGGCATTCATGCTGGAA  
CCTCCCCACAGCTCTGATGCCCTCAACAACGCCATCTCCACCCCTCTCGC  
CACGTTCCCTCAAACGACTCTCTGGGTTTCATCATTTGGAGTCGGTGTGG  
TCGGGAACCTCCTGATCTCCATCCTGCTGGTCAAAGACAAGAGCCTGCAC  
CGCGCACCCCTACTACTTCCCTGCTAGACCTGTGCGCCTCTGACATCCCTGCG  
CTCTGCCATCTGCTTCCCCTTCGTCTTACCTCTGTCAAGAATGGATCCG  
CCTGGACCTATGGCAGCTCACCTGCAAAGTGATCGCCTTCCCTGGGTGTG  
CTCTCCTGTTTTCCACACGGCGTTTCATGCTATTCTGTGTCAGTGTACTCG  
CTACCTGGCTATTGCGCATCACCGCTTCTACACCAAGAGGCTGACCTTCT  
GGACCTGTCTAGCTGTCTGTCATGCTGATGGTGTGGACGTTGTGAGTAGCCATG  
GCTTTTCCCCCAGTGTGGACGTAGGGACGTACTCCTTCATCCGAGAGGA  
GGACCAGTGACATTCAGCACCGTCTTTTCAGGGCCAATGACTCACTGG  
GCTTCATGCTCCTGCTGGCACTCATCCTCCTGGCCACACAGCTGGTTTAC  
CTCAAGCTCATCTTCTTTTGTCCACGACCGTCGGAAGATGAAGCCCGTGCA  
GTTTCGTGCCCTGCCGTCAGCCAGAAGTGGACCTTCCATGGGGCCAGGCGCCA  
GTGGGCAGGCGGCAGCTAACTGGCTTGCTGGATTTGGGAGAGGCCCCACC  
CCGCTTACCTTGTGGGCATCCGGCAGAACAGCAACCGGGCGGGCCGCGAG  
GCGTCTGCTGGTGTGGATGAGTTCAAACAGAGAAGAGGATTAGTAGGA  
TGTTCTACATCATGACGTTTTTTCTCCTGGCGTTGTGGGGCCCTATCTG  
GTAGCCTGCTACTGGCGGGTGTGGTGAAGGGGCCCGTAGTCCCCGGGGG  
CTACCTGACGGCAGCCGTGTGGATGAGCTTTGCCAGGCTGGGGTCAATC  
CCTTCATCTGCATNNNNNNNNNNNNNNNNNNNGCCAAATCTCGCTTTCACCCTGGCGTGGGGACTGGTC  
CTGGCACGGAGC---GCAGCGTCCCCTCGGCAACAGCTTGTATCCCCG  
CAGCAAACCGAGGAGCCACTGTTGCCACCCCGCAGCGATGGTTTGT  
CACCC---CTGCCAACAACCGACTGGACTTTGCTGCCCTCGGCATACGACG  
CGGCC-----GATTTCCGCGGTAACGCGGCCACCTTGTGTCTTAC  
GCAGCGGCCGGAGTGAAGGCTC-----TTCCTCTGCCGGCTGCAGGCTG  
CTCCAACCGGCCTCTTGGCTATTACGCAGACCCGTCGG---GCTGG---G  
GCGGACGCACGCCCGCAGTACTGTAGCGTAAACAGCAAACCAAGCTCG  
GTCCTTTCCTGCTGGCCCTCTAACTCTGTTCGGCGGCAGAGCAGGCG---C  
C---AATACCTGG-----CCGAGGA---CGGA---GACGC---CA  
TCCCACGAGGAGATCCCCG---AT---CGGTGGCTCCGAGGAG---ACG  
AAACCAAGGACCT-----GTCGGA---GTCGAGCTGGATAGAG---AC  
GCCGTCCCTCATTAAGTCAATTGATTCAAGCGATTCTGGTATCTTCG---  
AACAGGCCAAAAGAAGAAGTCTCTCCCTCTGCCACGCC-----  
GTTTCAGAACTGTGTCCCGTTAAAATCTNNNNNNNNNNNTCAACAGGCGAAGTCACAGA  
GAGAGAAGTGGCGTTGGGGATAAAATCCGTTTCGCGGACGGGATGGGGCGCT  
TCAAAAATCAACCACAGCTCCACGATATTGGCTCCGG---ACAGACGGCG  
TTTTCTCCAGGCG---CCCGCTAC---GCAGCGGCCCGCCCTGGGA---

-CACCATCA-----CCACCCGACCCACGTTGGCTCT---TACTCCACGG  
CGGCTTCAACTCCACCCGGGACTTCTCTTCAGAAATCGGGGTTTCGGA  
GACGCCACCGG-----GGCGCAGCACAGTTTGTTCGCCTC---  
-----CGGAAGTTT---C-----GCAGGGCCACATGGACACTCAGATG  
CCGCGGGACACCTGCTCTTCCCAGGACTCCACGAG---CAAGCAGCGAGC  
CACGCGTCTTCTAACGTGGTCAACAGCCAGATGCGATTGGGCTTCTCGGG  
GGACATGTATGGTCGGGCGGACCAGTATGGCCACGTTACAAGCCCAAGGT  
---CCGACCACTATGCTTCGACCCAGTTGCACGGCTATGGCCCCATGAAC  
ATGAATATGGCCGCA---CACCACGGAGCAGGGGCTTCTTTAGATACAT  
GAGGCAGCCGATCAAACAAGAGCTCATCTGCAAGTGGATCGAGCCGGAGC  
AACTGACGAATCCCAAAAAGTTCGTGCAACAAAATTTTAGTACGATGCAT  
GAGCTGGTGACCCATCTGACGGTGGAGCATGTGGGGGGACCAGAGCAGTC  
CAACCACATCTGCTTCTGGGAAGACTGCGCCAGAGAAGGGAAACCATTCA  
AAGCCAAATACAAACTTGTAATCATATCAGAGTACACCCGGAGAGAAA  
CCCTTTCATGTCCGTTCCCAGGCTGTGGNNNN

>Monopterus albus

AGCCTATTAATTTCGAGCCGAACCTCTGCCAGCCCCGGCTCCCTCCTAGGGGA  
TGACCAAATCTACAATGTTATTGTAACAGCGCATGCAATTTATTATAATCT  
TCTTTATAGTAATACCTATCATAATCGGGGGCTTTGGAAACTGGTTAGTC  
CCACTAATAATCGGGGCCCCAGACATAGCCTTTCCCCGAATAAAACAACAT  
AAGCTTTTACTCCTCCCCCCTCTTTTCTATTACTCTTAGCCTCCGCCG  
GCATTGAAGCCGGGGCGGGAACAGGTTGAACTGTCTACCCCCCTCTCGCT  
GGAAACCTTGCTCACGCAGGCGCCTCTGTTGACCTTACAATCTTCTCCTT  
ACACCTAGCAGGTGTTTCTTCAATTCTTGGGGCCATCAACTTTATCACA  
CCATCATCAACATAAAACCTCCCGCAATTTCTCAGTATCAAACCCCCCTA  
TTCGTATGATCTGTCATAATCACAGCCATTCTTCTCCTTCTATCGCTCCC  
TGTGCTAGCAGCCGAATTACAATATTACTAACGGACCGAAACCTTAACA  
CAACTTTCTTTGACCCTGCTGGAGGGGGGACCCCATCCTGTACCAACAC  
CTATTCTGATTCTTCGCCACCCTGAAGTATATATCTTGATTCTTCCAGG  
CTTTGGAATAATCTCTCATATCGTTACCTTTTATGCTGGTAAAAAGAAC  
CTTTGCGCTATATAGGGATAGTGTGAGCAATAATAGCCATTGGCCTACTA  
GGCTTATTGTTTGGAGCTCATCATATATTCACAGTCGGGATAGACGTTGA  
CACACGAG----TTCTGGAGAGAAACCTTCACCCATCTAATTGTCTTGG  
CATGTTGCTGCTGTCCGACGCCACCAGTGTACCAAGCTGTCAGAGCTCT  
CCTGGGGCATGTGCCTCAGCAACTTCCCTGCTATTTGCAAGAMTGACGAC  
TTCTCCAACCTGCCAAAGATATGGTGGTGCAGCTTTTGTACATGAGGA  
GCTTGAGACAGAAGATGAGAAACTGGTTTATGAAGCTGCCCTTAACGGA  
TCAACTATGACTTGGAAGGAGGCACTGCCACCTTCCAGAGCTCCTGCCA  
ACAGTCCGCCTGGCTCTACTGCCTGCCATCTTTCTGATGGAGAATGTCTC  
GACAGAAGAGCTGATCAATGCCAGGCCAAGAGCAAGGAGCTGGTGGATG  
AAGCTATCCGCTGTAAGCTGAAGATCCTGCAGAATGATGGTGTGTTAAC  
AGCCCATGTGCTCGACCAAGAAAAACCAGTCATGCCCTTTTCTTCTGCGG  
AGGGCAAACCTTCATGTGTGACAAGTTGTACCTGGTRGAYCAGAAGGCCA  
AAGAGATCATCCCCAAGGCTGATATCCCAGCCCCAGGAAGGAATTTAGC  
GCCTGCGCCATCGGGTGAAGGTGTACATCACTGGAGGGA--GAGGCTC-  
AGAGAACGGTGTGTCCAAAGATGTGTGGGTCTATGACACCATCCATGAGG  
AATGGTCCAAAGCGGCTCCCATGCTYATCGCCAGGTTTGGCCAYGGCTCT  
ACAGAGCTGAAACACTGCCTCTATGTGGTAGGAGGTCACACTGCAGCAAC  
TGGCTGCCTCCCGGCTTCTCCATCAGGATGATTATATTGTTGTGTTTACT  
CGTTCAACAACAAGGCTGATAATTAATGAAGCAGAGCTAATCATGGCACT  
GGCACAGGAGTTCCAGATGAAAGTAGTCACAGTATCCCTGGAGGAACAGT  
CTTTCAATAGTATCGTCCAGGTGATCAGTGGTGTCTCCATGTTAGTAAGC  
ATGCATGGAGCTCAACTAATCACCTCACTTTTTCTCCCCAGAGGAGCTAC

TGTGGTGGAGCTGTTCCCCTTTGCTGTAAACCCAGAACAGTACACCCCAT  
ATAAAACCCTTGCATCTCTTCCAGGCATGGATCTTCACTATATCTCTTGG  
AGGAACACTAAGGAAGAGAACACCATCACCCACCCAGACAGAACCTGGGA  
ACAAGGAGGCATTGCTCACTTGGAGAAGGAAGAGCAAGAGCGAATACTGG  
CCAGTAAGGATGTCCCAGGCACCTGTGCTGTGTAACCCAGAGTGGCTC  
TTCCGGATCTACCAGGACACATTGGTGGACATTCTTCTTTCTTGGAAAT  
TCTCAA---AGAGGGCATGAAG---ACCAAGCCCAGCTTTAAGAA---GT  
CAAAGTTAGCCAGCACAGTCCACCCAGGCCGGGTAGAGAACCCAGTGT  
CAGACCTCTGTACAACTACTAATGAGGCTAAACTCACAGTCTCCTGGCA  
GATCCCATGGAATCTGAAATACCTGAAGGTAAGAGAGGTGAAGTATGAAG  
TGTGGATCCAGAAAAAGACAGCAGCAAGGGGACGCTGGAGGATCAGATC  
ATCCAGGCAAACCTGCACTGGAGGCCTTTGGCAACGCTAAAAACAGTAAG  
AAATGACAACCTCTCTCGTTTTGGAAAATTCATACGAATTCATTTTGGTA  
CAAGTGGAAAACCTGGCATCTGCTGACATTGAGACGTACCTGCTGGAGAAG  
TCACGTGTCACCTTTCAGCTCAAGGCTGAGAGAAGCTACCATGTCTTCTA  
CCAGATCCTGTCCAATCAGAAGCCAGAGCTGTTGGACATGCTACTGGTCA  
CCAACAACCCATACGACTACGCCTACATCTCCCAAGGAGAGGTAACAGTT  
GCTTCTATCAATGACTCAGAGGAGCTGATGGCCACTGACAATGCCTTTGA  
TGTGCTTGGCTTCACTCCAGAGGAGAAGATGGGCATCTATAAATTGACTG  
GTGCCATCATGCACTATGGCAACATGAAGTTCAAAACAGAAGCAGCGTGAG  
GAGCAGGCTGAACCTGACGGGACAGAGGCGGCTGATAAGACAGCTTTCTT  
AATGGGGCTAAACTCTGCTGACCTCATCAAAGGCCGTGTCATCCCAGAG  
TCAAAGGTAGGAAATGAGTACGTCACCAAGGGCCAAGGCGTGGACCAAGTC  
TACTATCCCAACAAGGAGGCCTTCAAAGTGTGAGGAGTGTGGGAAGCACTA  
CAACACCAAGCTAGGATATAAGCGCCATGTGGCCATGCACTCTGCCACTG  
CAGGGGATCTCACCTGTAAAGTGTGCATGCAGAGCTATGAGAGTACACCT  
GTTCTCCTGGAGCATCTCAAGAGCCACTCCGGGAAGTCTTCAAAGTGGCAC  
CAAGGAAAAGAAACATCCATGCGACCCTGTGACCGCGTTTCTACACGC  
GGAAGGATGTGAGGCGGCACATGGTGGTACACACAGGTCGAAAGGACTTC  
CTGTGCCAGTACTGTGCCAGCGCTTCGGTAGGAAGGACCACCTGACACG  
CCACGTGAAGAAAAGCCACTCCCAGGAGCTGCTGAAGATCAAGACAGAGC  
CTCCGGACATGTTAGGTCTTTTAGCTTCAGGGTCACCACCTTGTCTGTGTC  
AAGGAGGAGCTCAGCCCCATGATGTGCAGCATGGGTCCCAACAAAGACCC  
CATGATGGGCAAACCATTTCCCAGTGGGGCGCCTTTTCCAATGGGCATGT  
ACAACCCCACCAT-----CTTCAGGCCATGTCTAATAGTGGGGTGGGT  
CACCCA-----CACCCATCCCTGATGCCCACTTCTTGTCTGCAGCTAT  
GGGGATGGGCTGTACATGGAANNNNNNNNNNNNNNNNNNNNNNNNNNNNNNGGGGTGTTTACAGATCAGT  
GATGGATCA  
AACATTTGTGAACCTACTGGCTAGTAACTCTCCAAGTGTTCATATGCACT  
GACCCAACAGAAATATTTTCAAGTAACTACAGTCCCTGTGATTGGATTTTACA  
TTTACGAGCCCATTGAGTACTGGAACTCGACGGTGCAGGAGCACCTGAAG  
TCTCTGAGTCATGGCTTCAACAAGATCTCCTGGATGGACAACCTTTTCCA  
CTACCTGAAGGTAGTAAATGTGAGTGCATCAACCAAGAGCGATTTTATCA  
ACATCCTCAAGGGCTCTTTCCTCCGCAGCCCAGAATACCAACACTTCACT  
GAGGACATCATTTTCTCTAAGA---ACCGTGAGACTG-----ACGAGTA  
TGATATTATTGCCTCACGGATGTACCTGGTGGCACGGACAACAGAGAAAA  
AGCGCGAGGAGGTGGTGGAGCTTTTGGAAAAGCTTCGTCCGTTGATGCTG  
ATCAACAGCATCAAGTTCATTGCCTTCAATCCAACATTTGTGTTTATGGA  
CCGCTACAGCTCCTCTGTCAATTCACCCATCCTGACCTCAGGCTTCAGCG  
TACTCACTATTCTCATCCTCACTTTCCTTCTGATCATCAACCCCTGGGA  
AACTTCNNNNNNNNNNNNNNNNNNNNNNNNNNNNNNNNNNNNNNNNNNNNNNNGGCTTCCACCAGT  
TTGAATGGCAGCCAGCTCTCAAGAAATGTGTC  
TCCATCCTGCAATGTCAGCATTATTAATGGGCTCTCTGGATGGGCTTCCT

CAGTGGATGACTCTGCAGCTGATACCATCGGTGGCGTTTTTCGCTATGAT  
GTGGCACTGGTGTGTCAGCATTAAAGGATCTGGAGGAGGACATCATGGAGGG  
GCTGAGAGAGAGTGGGATGGAAGACAGTGCTTGCACCTCAGGCTTTAGTG  
TCATGATCAAGGAATGTTGTGATGGCATGGGTGACGTCAGCGAGAAGCAC  
GGCGGGGACCGATGGTTCCTGAGAAAGCTGTACGTTTCTCTTTCCTACTGT  
TATGTCGTCTCTGTCCCTGGCGGATGATAGGGAG-----  
-----AAGGAGGTTATCATTTTTCACTGAGCCAAAGCCAAAC  
TCAGAACTATCCTGTAAGCCCCTATGCCTGATGTTTGCAGATGAGTCAGA  
CCATGAGACACTCACAGCTGTCTGGGGCCTATAGTTGCAGAGCGTAATG  
CAATGAAAGAGAGCCGACTCATTCTATCTATTGGCGGACTTGCCTCGCTC  
CTCCGCTTCCACTTCAGAGGCACAGGATATGATGAGAAGATGGTGCAGAGA  
GATTGGAGGGCTGGAGGCCTCTGGGTCCACATACGCTCTGCACTCTTTGTG  
ACTCAAGTGAACAGAGGCCTCTCAAAACATGGTTCACACTGCATCACC  
CGCAGTCATGAAGAGAACCCTAGAACGTTATGAAATATGGAGAACCAACCC  
CTTCTCTGAATCTGTGGATGAGCTGCGAGACAGAGTCAAAGGGGTCTCGG  
CAAAGCCCTTCATGGAGACCCAGCCCACGCTAGACGCATTGCACTGTGAC  
ATTGGCAATGCCACTGAGTTCTATAAAATCTTCCAAGATGAGATTGGCGA  
GGTGTATCAAAAGGT---CAAT---CCCAGCAGGGAGGAACGGCGCAGCT  
GGAGGGCAGCCCTAGATAAAACAACCTGAGGAAGAAGATGAAGCTCAAGCCG  
GTAATGAGGATGAATGGGAACTATGCCCGCAGGCTAATGACCCTAGAGGC  
TGTGGAGGTGGTGTGTGAGCTGGTGCCTCAGAGGAGAGAAGGGAGGCC  
TAAGGGAGCTTATGCGGCTTTACCTCCAAATGAAGCCTGTGTGGCGTGCC  
ACCTGCCCGGCCAAGGAGTGCCCCGACCAGCTGTGTGCTACAGCTTTAA  
CTCCCAGCGCTTTGCCGACATCCTCTCCTCTACTTTCAAATATAGATACA  
ATGGAAAAATAACCAATTACCTGCACAAGACTCTGGCCCATGTGCCTGAA  
ATAATAGAGAGAGATGGATCCATAGGAGCCTGGGCCAGTGAGGGTAATGA  
GTCTGCAAACAAATCATAACCATCGAGATGGGTTCCTGAGGGCCTCAGT  
GGAAGGAGAGCCCGCAGCCTTTCTCCTGCTCCATTGAAGACCCACAAAA  
CAGACAAAGTTCAAGGGCATCAAGACATACATTTTCATACCGAGTCACACC  
GAGCCACACAGGGCGTCCCGTTTACAGGCCTTACAAACACTTTGACTGGC  
TGTACAACCGCTTACTGCACAAGTTCCTGCTGATCTCTGTGCCTCACCTG  
CCTGAGAAGCAGGCGACGGGGCGATTTGAGGAAGATTTTCATCGAGAAGCG  
TAAGAGGCGATTGATACTATGGATGAACCACATGACCAGCCATCCAGTCC  
TCTCCCAGTATGAAGGCTTTGAGCACTTTCTGATGTGTGCTGATGACAAA  
CAGTGGAAACTGGGCAAGAGAAGGGCAGAGAAGGACGAGATGGTGGGTGC  
TCATTTTCATGCTGACCTCCAGTTCCTAAAGAGCACCAGGACCTTCAGG  
ATGTAGAGGAGCGGGTCGACACCTTCAAGGCCTTTGCTAAGAAAATGGAT  
GACAGTGTGATGCAGCTCATGCATGTTGCCTCTGAGCTGGTGCCTAAACA  
CCTGGGTGGGTTTCAGGAAGGAGTTCAGCGGCTGGGAAATGCCTTCAGT  
CTATCAGCCAGGCCTTCATGCTGGACCTCCCCACAGCTCAGAAGCCCTC  
AACAGCGCCATCTCCATNNNNNNNCTACGTTCCCTCAAACCTGACCTCTCTGGGTTTC  
ATCATTTGGAGTTGGTGTGGTAGGAAACCTCCTGATCTCCATCCTCCTGGT  
CAAAGACAAGAGTCTGCACCGAGCACCTACTATTTCCCTGCTAGACCTGT  
GTGCTTCAGATATCCTGCGATCTGCGATCTGCTTCCCCTTTGTCTTCACA  
TCAGTCAAGAATGGATCTGCCTGGACCTATGGCACGCTGACCTGCAAAGT  
GATAGCCTTCCCTGGGTGTGCTCTCCTGTTTCCATACAGCATTTCATGTTAT  
TCTGTGTGTCAGTGTACCCGCTACCTGGCCATCGCACATCACCGTTTCTAC  
ACCAAGAGGCTGACCTTCTGGACCTGTCTGGCTGTCATCTGCATGGTATG  
GACATTTGTGTCAGTGGCTATGGCATTTCACCAGTGTTAGACGTAGGGACAT  
ACTCTTTTATCCGGGAGGAGGACCAGTGCACATTCAGCACCGTTCCCTTC  
AGGGCAAATGATTCTCTGGGCTTCATGCTCCTGCTGGCGCTCATTTCTCTT  
GGCTACACAGCTGGTTCCTCAAGCTCATCTTCTTTGTTTCATGACCGCC  
GAAAGATGAAGCCTGTCCAGTTCGTGCCTGCTGTGTCAGCCAGAACTGGACC

TTCCACGGACCAGGTGCCAGTGGTCAGGCGGCAGCCAACCTGGCTGGCAGG  
ATTTGGTCGAGGCCCCACCCCGCTACTTTGTTAGGCATTCGGCAAACA  
GCAATGCAGCGGGTCGAGGCGTCTATTGGTATTGGATGAATTCAAACA  
GAGAAGAGGATTAGTAGGATGTTCTACATCATGACATTTTTCTTCTGGC  
GCTGTGGGGGCCCTATCTAGTCGCCTGTTACTGGCGGGTGTTCACGGG  
GCCAGTAGTCCCTGGGGGTACCTAACAGCAGCTGTTTGGATGAGCTTT  
GCCAGGCTGGGGTCAATCCTTTTATCTGCNNNNNNNNNNNNNNNNNGCCAAATCTCGCTTTCACCC  
TGGCGTGGGGACTGGTCCTGGCACGGAGC---GCAGCGTCCCCTCGGCA  
ACAGCTTGCTATCCCCGCAGCAAACCGAGGAGCCCCTGTTGCCACCCCC  
CCGCAGCGATGGTTTGTACCC---CTGCCAACACCGACTGGACTTTGC  
TGCTCGGCATACGACGCCGCT-----GATTCGCCGGTAACGCAG  
CCACCTTACTGTCTACGCAGCGGCCGGAGTGAAGGCTC-----TTCCC  
CTGCCGACTGCAGGCTGCTCCAACCGGCCTCTTGGCTATTACGCAGACCC  
ATCRG---GCTGG---GGAGGACGCACGCCGCCAATACTGCGGCCTAA  
ATAGCAAATCTAGCTCGGTCTTTTCTTGCTGGCCCCGCAACTCAATCGGC  
AGCAGAGCGGCCA---CC---AACTACCTGG-----CCGAGGA---  
GGGT---GACTC---CATCACGACMGAGAGGTCACCG---AT---CGGCG  
TCTCGGAGGAG---ACCAAACCCAAAGACATGAC---ATCAGA---GTCG  
AGCTGGATAGAA---ACGCCCTCCTCCATTAATCAATCGATTCAAGCGA  
TTCCGGTATTTTTG---AACAGGCCAAAAGGAGAAGAATCTCACCTTCTG  
CCACGCCG-----GTTTCAGAGACAGTGTCCCGTTAAAATCTGAG  
CATCACTCAACAGGAGAAGTACAGAGAGAGAAGTGGCGCTGGAGATAAA  
TCCGTTAGCGGATGGGATGGGCGCCTTTAAAATAAACACAGCTCCCATG  
ATATTGGCTCCGG---GCAGACGGCGTTTTTCTCCAGGCG---CCGGGC  
TAC---GCAGCAGCCGCCCTGGGA---CACCATCA-----CCACCCGAC  
CCACGTTGGCTCT---TACTCCACGGCAGCTTTCAACTCCACCAGGGACT  
TCCTCTTCAGAAATCGGGTTTCGGAGATGCCACCGG-----G  
GCGCAGCACAGTTTGTTCGCCTC-----CGGAAGTTT---C-----  
-GCAGGGCCACATGGACACTCAGATGCAGCGGGGCACCTGCTCTTCCCAG  
GGCTCCACGAG---CAAGCGGCGAGCCATGCGTCTTCCAACGTCGTCAAC  
AGCCAGATGCGACTGGGCTTCTCTGGGGACATGTACGGACGGGCCGACCA  
GTACGGCCACGTTACAAGCCACGGT---CCGACCCTATGCTTCGACCC  
AGCTGCACGGCTATGGCCCCATGAACATGAATATGGCCGCA---CACCAC  
GGAGCAGGGCCTTCTTTCGATACATGAGGCAGCCGATCAAACAAGAGCT  
CATCTGCAAGTGGATCGAACCGGAGCAGCTGACAAATCCCAAAAAGTCGT  
GCAACAAAACTTTTAGCACCATGCACGAGCTTGTGACCCATCTGACGGTG  
GAGCATGTGGGGGGACCAGAGCAGACCAACCACATCTGCTTCTGGGAGGA  
CTGCTCCAGAGAAGGGAAGCCATTCAAAGCCAAATACAAACTTGTGAATC  
ATATCAGAGTACACACCGGCGAAAAGCCGTTTCCGTGTCCGTTCCCGGC  
TGTGGCAA

>Morone chrysops

AGTCTTCTTATTTCGAGCAGAGCTAAGCCAACCGGGCGCCCTCCTTGGGGA  
TGACCAAATCTACAACGTAATCGTTACCGCACATGCATTTGTAATGATCT  
TTTTTATAGTAATAACCAATCATGATCGGAGGATTCGGAAACTGACTTATT  
CCACTAATAATTGGAGCACCTGATATAGCATTCCCCGAATGAACAACAT  
AAGTTTTTACTACTTCCCCCATCCTTCCTTCTCCTTCTGGCTTCTTCAG  
GCGTCGAAGCCGGGGCTGGGACTGGCTGAACCGTCTATCCCCCCTTGCA  
AGCAACCTTGACACGCAGGTGCATCTGTAGACTTAACAATTTTTTCTCT  
CCACCTGGCTGGGATCTCCTCAATTCGGGGGCCATTAATTTTCATCACA  
CTATTATTAACATGAAGCCTCCCGCTATTTCCCAGTACCAAACCCCTTA  
TTTGTCTGAGCTGTTCTAATTACAGCCGTCCTTACTTCTCTCTCTGCC  
AGTCTTCGAGCCGGAATTACAATACTACTTACAGACCGAAATCTAAACA  
CCACCTTCTTTGACCCTGCCGGGGGAGGGGACCCCATCCTCTACCAACAC

CTC-----

-----TTCTTAGAGAGAAACCTTCACCCATCTAACTGTCCTGG  
CATGCTGTTGCTGTCTGATGCCACCAGTGTACCAAGCTGTCAGAGCTTT  
CCTGGGGCATGTGCCCTCAGCAACTTTCCTGCTATTTGCAAGACAGAGGAC  
TTCTCCAACCTGCCCAAAGATATGGTAGTGCAGCTCTTGTACATGAGGA  
GCTAGAGACAGAAGATGAGAGACTGGTTTATGAAGCTGCCCTCAACTGGA  
TCAACTATGACCTAGAAAAGAGGCACGTGCACCTTCCAGAGCTCCTGAGA  
ACAGTCCGTCTGGCCCTACTGCCTGCCATCTTTCTCATGGAGAACGTTTC  
TACAGAAGAGTTGATCAACGCCAGGCCAAGAGCAAGGAGCTAGTGGATG  
AAGCTATCCGCTGTAAGCTGAAGATACTACAGAATGATGGCGTTGTTAAC  
AGCCCCGTGTGCTCGACCAAGAAAAACCAGCCATGCCCTTTTTCTTCTGGG  
TGGGCAGACTTTCATGTGTGACAAGTTGTACCTAGTGGATCAGAAAAGCCA  
AAGAGATAATCCCCAAGGCAGACATTCCCAGCCCCAGGAAGGAGTTCAGC  
GCCTGCGCCATCGGCTGTAAGGTGTACATCACCGGTGGAA--GAGGCTC-  
AGAGAATGGTGTTCCTCAAAGATGTATGGGTCTATGACACCGTCCATGAGG  
AATGGTGAAGGCAGCACCCATGCTCATTGCCAGGTTTGGCCACGGCTCT  
GCGGAGCTGAAGCACTGCCTGTATGTAGTAGGAGGTCACACCGCAGCAAC  
TGGCTGCCTCCCGCCTCTCCGTCCGGATGAATACATTGTCGTGTTTAGT  
CGTTCAACAACAAGGCTGATACTGAATGAAGCAGAGCTGATCATGGCGCT  
GGCCAGGAGTTCAGATGAGAGTGGTACAGTATCCTTGGAGGAGCAGT  
CTTTCCCCAGTATCGTCCAGGTGATAAGCGGTGCCACCATGTTAGTCAGC  
ATGCATGGAGCTCAGCTTATCACCTCACTCTTCCCTCCCCAGGGGAGCTGC  
TGTGGTAGAACTATTCCCCTTTCAGTGAACCCAGAGCAGTACACCCCAT  
ATAAAACCTTGCCTCCCTTCCAGGCATGGACCTTCACTATGTCTCCTGG  
AGGAACACTAGGGAGGAGAACACCATCACCCATCCAGACAGACCCCTGGGA  
ACAAGGGGGCATCGTTCACCTGGAGAAGGAGGAACAAGAGCGAATACTGG  
CGAGCAAAGATGTCCCCAGGCACCTGTGCTGCCGCAACCCAGAGTGGCTC  
TTCCGGATCTACCAGGACACTTTGGTGGACATCCCTTCTTTTCTGGAGGT  
CCTCAA---AGAGGGCATGAAG---ACAAAGCCCAGCTTGAAGAA---AT  
CAAAGCCAGCCAGCACAGTCCACCCGGCCGGGTCAGAGAACCCCACTGT  
CACACCTCAGTACAAACCACTAATGAGGCTAAACTCACGGTCTCCTGGCA  
GATCCCCTGGAATCTGAAATACCTGAAGGTGAGAGAGGTGAAGTACGANNNNNNNNNNNAA  
AAAAGACACCAGCAAGGGAACACTGGAGGATCAAATCATCCAGGCGAACC  
CTGCGTTGGAGGCCTTCGGCAACGCCAAAACGTTGAGAAACGACAACCTCG  
TCTCGTTTTGGAAAATTCATCCGGATTCACCTCCGGTACGAGTGGCAAGCT  
GTCGTCTGCTGACATAGAGACGTACCTGCTGGAGAAGTCACGTGTCACCT  
TTCAGCTCAAGGCTGAGAGGAACCTACCACATCTTCTACCAGATCCTGTCC  
AATCAGAAGCCAGAGCTGCTGGACATGCTGCTTATCACCAACAACCCGTA  
CGACTACTCCTACATCTCCCAAGGAGAGGTAACGGTTGCCTCCATCAACG  
ACTCAGAGGAGTTGATGGCCACTGACAGTGCCTTCGATGTGCTCGGCTTC  
ACTCCAGATGAGAAGATGGGTGTCTATAAACTGACGGGCGCCATAATGCA  
CTACGGCAATATGAAGTTCAAACAGAAGCAGCGTGAGGAGCAGGCAGAGC  
CCGATGGGACAGAGGCTGCGGATAAAAACAGCCTACCTAATGGGGCTGAAC  
TCTGCTGACCTCATCAAAGGGTTGTGCCATCCCAGAGTCAAGGTAGGAAA  
TGAATATGTCACCAAAGGCCAAAGTGTGGACCAAGTCTACTACCCCAACA  
AGGAGGCCTTCAAGTGTGAGGAGTGTGGGAAGCACTACAACACCAAGCTG  
GGATAAAGCGCCATGTGGCCATGCACTCTGCCACAGCAGGGGATCTCAC  
CTGTAAAGTATGCATGCAGACGTACGAGAGCACGCCCTGTGCTGTTGGAGC  
ACCTCAAGAGCCACTCCGGAAAGTCTTCAGGAGGCACCAAGGAGAAGAAA  
CACCCGTGCGACCACTGTGACCCCGTTTCTACACACGGAAGGATGTGAG

ACGGCACATGGTGGTGCACACAGGCCGAAAGGACTTCCTGTGCCAGTACT  
GTGCCCAGCGCTTCGGCAGGAAGGATCATCTGACACGCCATGTGAAGAAG  
AGCCACTCGCAGGAGCTGCTGAAGATCAAGACGGAGCCTCCTGATATGTT  
AGGTCTTTTAGCTTCGGGTACCACCTTGCTCTGTGAAGGAGGAGCTCA  
GCCCCATGATGTGCAGCATGGGTCCCAACAAAGACCCCATGATGGGCAA  
CCGTCCCTAGTGGGGCCCTTTTCCGATGGGCATGTACAACCCCA  
T-----CTCCAGGCCATGTCTAATTCTGGGGTGGGTACCCA-----C  
ACCCATCCCTGATGCCACTTCCTTGTCTGCAGCTATGGGCATGGGCTGT  
CACATGGAATATCTCATCTATGCCCTATTCTCATTCATGGGATGTTTACA  
AATCAGTGATGGATCAAATATTGTGAACCTGCTGGCTAGTAACTCTCCAA  
GTGTTTCATACGCTCTGACCCAGCAGAAATACTTCAGTAACTATAGTCCC  
GTGATTGGGTTTTACATTTACGAGCCATTGAATACTGGAACCTCACGGT  
GCAGGAGCACCTGAAGACTNTGAGTCATGGCTTCAACAAGATCTCCTGGAT  
GGACAACTTTTTCCACTACCTGCGGGTGGTGAATGTGAGTGCGTCAACAA  
AGAATGACTTCATCACCATCCTCAAGGGCTCCTTCCCTGCGTAGCCCGGAG  
TACCAGCACTTCACTGAGGACATCATATTCTCCAAGA--ACCGTGAGAC  
TG-----ATGAGTACGATATTATTGCCTCACGGATGTACTTGGTGGCAC  
GGACGACAGAGAAGAAGCGCGAAGAAGTGGTGGAGCTTCTGGAAAAGCTT  
CGACCGTTGATGCTGATCAACAGCATCAAGTTCATTGCCTTCAACCCTAC  
GTTTGTGTTCTTGGACCGCTACAGCTCCTCTGTCTATCTCGCCCATCCTGA  
CCTCAGGATTACAGCTACTCACAATCCTCATCCTCACTTTTCTTCCCTGGTC  
ATCAACCCCTTGGGGAACCTTCTGGCTCATCCTTACTGTAACGTCCGTGGA  
GCTGGGCGTCTTGGGTTTGANNNGCTTTCACCAGTTTGAATGGCAGCCAGCT  
CTCAAGAATGTGTCTACATCTTGAATGTTGGCATTATTAATGGGCTCTC  
TGGATGGGCTTCCCTCAGTGGATGAGTCCCCAGCTGACACCATCACTCGGC  
GGTTTCGCTATGATGTGGCACTGGTGTGAGCATTAAAGGATCTGGAGGAG  
GACATCATGGAGGGGCTGAGAGAGAGTGGGATGGAAGACAGCGCTTGCAC  
CTCAGGCTTTCAGTGTCTGATCAAGGAATCTTGTGATGGCATGGGAGATG  
TCAGCGAGAAGCATGGTGGAGGACCAGTTGTTCTGAAAAGGCTGTACGT  
TTCTCTTTCACTGTTATGTCTGTCTCTGTCTTGGCAGACGATGAGGAG--  
-----GAAGAGGTTACCATCTTCACGG  
AGCCAAAGCCAAACTCAGAACTGTCTGTAAGCCCTTTGCCTGATGTTT  
GTGGATGAGTCAGACCATGAGACACTCACATCCGTCCTGTGGCCTATAGT  
TGCAGAGCGTAATTCATGAAAGAGAGTAGGCTCATCCTATCTATGGGTG  
GACTACCTCGCTCCTTCCGCTTCCACTTCAGAGGCACGGGATATGATGAA  
AAGATGGTGCCTGAGATGGAGGGCCTTGAAGCATCAGGGTCCACCCATAT  
CTGCACTCTTTGTGACTCCAGTCGGGCAGAGGCATCTCAAAACATGGTTC  
TACACTCCATCACCCGCAATCATGAAGAGAACCTAGAACGTTATGAAATT  
TGGAGAACCAACCCCTTTTCTGAGTCTGTGGATGAGCTGCGAGACAGAGT  
CAAAGGGGTCTCTGCCAAGCCCTTCATGGAGACTCATCCCACGCTGGATG  
CATTACACTGTGACATAGGCAATGCCACTGAGTCTACAAAATCTTCCAA  
GATGAGATCGGGGAGGTGTTCAAAAAGGT---CAAC---CCCACCCGGGA  
GGAACGGCGCAGCTGGAGGGCAGCCCTAGATAAAACAACTGAGGAAGAAGA  
TGAAGCTTAAACCGGTAATGAGGATGAATGGGAACATGCCCCGAGGCTA  
ATGACCCTGGAGGCTGTGGAGGTGGTGTGTGAGCTGGTGGCCTCAGAGGA  
GAGGAGGGAGGCCCTGAGGGAGCTTATAAGGCTCTACCTACAGATGAAGC  
CTGTGTGGCGTGCCACCTGCCAGCCAAGGAGTGCCCTGACCAGCTGTGC  
CGCTACAGCTTTAACTCCCAGCGCTTTGCCGACCTCCTCTCCTCTACTTT  
CAAATATAGGTACAAATGGAAGATAACCAATTACCTGCACAAGACCCTGG  
CCCATGTGCCTGAAAATCATAGAGAGAGAYGGATCCATAGGAGCATGGGCC  
AGCGAGGGGAACGAGTCAGCAAACAAANNNNNNNNNNNNNNTGGGTCCCATGGGGCCCTGTGG  
AAGGATAGCCACAGCCTTTCTCCTGCTCCATTGAAGACCCCACTAAGCA  
GACAAAGTTCAAGGGCATCAAGACGTACATTTTCGTACCGGGTGACGCCGA



GCCACACAGGGCGTCCTGTCTACAGGCGCTACAAACACTTTGACTGGCTG  
TACAACCGCTTACTGCACAAGTTCACGTGTGATCTCCGTGCCTCACTTGCC  
CGAGAAGCAGGCCACGGGGCGATTGAGGAAGATTCATTGAGAAGCGTA  
AGAGGCGACTGATACTGTGGATGAACCACATGACCAGTCACCCAGTCCTC  
TCCCAGTATGAAGGCTTCGAGCACTTCTGTATGTGTGCTGATGACAAACA  
GTGGAAACTGGGCAAGAGACGGGCTGAGAAGGACGAAATGGTGGGTGCC  
ATTTTCATGCTGACCCCTCAGATCCCTAATGAGCACCAGGACCTTCAGGAT  
GTAGAGGAGAGGATCGACTCCTTCAAATCCTTTGCTAAGAAAATGGATGA  
CAGCGTGATGCAACTCACACATGTTGCCTCGGAGCTGGTTCGTAAGCACC  
TGGGAGGGTTTCAGAAAGGAGTTCAGCGGCTGGGAAATGCCTTCCAGTCT  
ATCAGCCAGGCGTTCGCGCTGGACCCCTCACACAGCTCAGAGACCTTCAA  
CAACGCCATCTCCCATNNNNNNNNNNNGTTTCTCAAACCTGACCTCTCTGGGTTTCATCATT  
GGAGTCGGTGTGGTTGGAAACCTCCTGATCTCCATCCTGCTGGTCAAAGA  
CAAGAGCCTGCACCGAGCGCCCTACTATTTCTGCTGGACCTGTGCGCCT  
CTGATATCCTGCGCTCCGCCATCTGCTTCCCCTTTGTCTTACCTCGGTC  
AAGAATGGATCTGCATGGACCTATGGCAGCTAACCTGCAAAGTGATCGC  
CTTCTGGGTGTGCTCTCCTGTTTCCACACGGCGTTTATGCTATTCTGTG  
TCAGTGTACACGTTACCTGGCCATCGCACACCACCGTTTCTACACCAAG  
AGGCTGACCTTCTGGACCTGTCTAGCTGTCATCTGCATGGTGTGGACATT  
GTCAGTGGCTATGGCTTTCCACCGGTGCTAGACGTAGGGACGTACTCTT  
TTATCCGGGAGGAGGACCAGTGCACGTTCCAGCACCGTTCTTCCAGGGCG  
AATGATTCACTGGGCTTCATGCTCCTGCTGGCTCTCATCCTCCTGGCCAC  
ACAGCTGGTTTACCTCAAGCTCATCTTTTTTCGTCCACGATCGTCGAAAGA  
TGAAGCCTGTCCAGTTCGTGCCTGCTGTCAGCCAGAACTGGACCTTCCAC  
GGGCCAGGCGCCAGTGGGCAGGCGGCGGCCAACTGGCTGGCTGGATTCCG  
CCGAGGACCCACCCACCTACCTTGCTCGGCATCCGGCAGAACAGCAACG  
CAGCAGGCCCGAGGCGTCTACTGGTATTGGATGAATTCAAACAGAGAAG  
AGGATTAGTAGGATGTTCTACATCATGACGTTTTTCTTCTCCTGGCACGTG  
GGGGCCCTATCTGGTGCCTGCTACTGGCGGGTGTGTTGCAAGGGGCCCTG  
TGGTCCCTGGGGGCTACCTGACGGCAGCCGTGTGGATGAGCTTTGCCCAA  
GCTGGGGTCAATCCTTTCATCTGCATCTTCTCCNNNNNNNNNGCCAAATCTCGCTTCA  
CCCTGGCATGGGGACTGGTCCTGGCACGGAGC---GCAGCGTCCCACTCG  
GCAACAGCTTGCTATCCCCGAGCAAAACGAGGAGTCCACTGTTGCCACC  
CCCCCGCAGCGATGGTTTGTACCC---CTGCCAACACCGACTGGACTT  
TGCTGCCTCGGCATACGACGCTGCT-----GATTTCCGGGTAACG  
CGGCCACCTTGCTGTCTACGCAGCGGCCGGAGTGAAGGCTC-----TT  
CCCCTGCCGACTGCAGGCTGCTCCAACCGGCCTCTTGGCTATTACGCAGA  
CCCGTCGG---GCTGG---GGAGGACGCACGCCGCCGAGTACTGTGGTG  
TAAATAGCAAATCCAGCTCGGTCTTTTCTGCTGGCCCGCTAACTCTCTC  
GGTGGCAGAACGGGCA---CC---AACTACCTGG-----CTGAGGA  
---GGTA---GACTC---CATCCCGACAGAGAGGTCACCG---AT---CG  
GCGGCTCGGAGGAG---GCCAAACCCAAAGACATGAC---ATCAGA---G  
TCGAACTGGATAGAG---ACGCCGTCTCCATTAAGTCAATTGATTCAAG  
CGATTCTGGTATCTTTG---AACAGGCCAAGAGGAGAAGAATCTCACCTT  
CTGCCACGCCG-----GTTTCAGAGACAGTGTCCCCATTAAANNNNNNNNCATC  
ACTCAACAGGCGAAGTCCAGAGAGAGAAGTGGCGTTGGGGATAAATCCG  
TTCGCTGATGGGATGGGCGCCTTCAAATAAACCACAGCTCCCATGATAT  
TGGCTCCGG---ACAAACGGCGTTTCTCCTCCAGGCG---CCCGGTAC-  
---GCAGCAGCCGCCCTGGGA---CACCATCA-----CCACCCGACCCAC  
GTTGGCTCT---TACTCCACGGCGGCTTCAACTCCACCAGGGACTTTCT  
CTTCAGAAATCGGGGTTTCGGGGACGCCACCGG-----GGCGC  
AGCACAGTTTGTTCGCCTC-----CGGAAGTTT---C-----GCA  
GGGCCACATGGACACTCAGATGCAGCGGGGCACCTGCTCTTCCCAGGGCT







-----  
-----  
-----  
-----  
-----  
-----  
-----  
-----  
-----  
-----  
-----  
-----  
-----  
-----  
-----  
-----  
-----  
-----  
-----  
-----  
-----  
-----  
-----  
-----  
-----  
-----  
-----  
-----  
-----  
-----  
-----  
-----  
-----  
-----  
-----  
-----  
-----  
-----  
-----  
-----  
-----  
-----  
-----  
-----  
-----  
-----  
-----  
-----  
-----  
-----  
-----  
-----  
-----  
-----  
-----  
-----  
-----  
-----  
-----

>Myctophum punctatum  
AGCCTCCTTATCCGAGCCGAACTCAGCCAACCCGGCGCCCTCCTCGGAGA  
CGATCAAATTTACAACGTAATTGTTACGGCTCACGCCTTTGTAATAATCT  
TCTTTATAGTCATGCCCATCCTAATTGGAGGATTCGGAAACTGACTAATC  
CCCCTGATGATTGGGGCCCCCGACATGGCATTCCCCCGAATGAATAATAT  
GAGTTTCTGACTTCTCCCTCCTTCCTCCTCCTGCTCCTAGCCTCCTCCG  
GCGTAGAAGCGGGGCGAGGGACCGGCTGAACGTATACCCACCCCTCGCG  
GGAAACCTCGCCACGCTGGAGCCTCAGTCGACTTAACAATTTTTTCGCT  
CCACCTAGCAGGCGTGTCTTCAATTCTAGGCGCTATTAACCTTTATTACAA  
CTATCATTAACATAAAAATCCCCTGCTATCTCACAGTACCAGACGCCCTC  
TTTGCTGAGCCGTCCTAATCACCGCCGTACTCCTCCTTCTATCCCCTCC  
TGTTCTAGCTGCTGGCATTACTATGCTCTTAACGGATCGAAACCTAAACA  
CCACTTTCCTCGACCCAGCAGGGGGAGGAGACCCCATCCTTTACCAACAC  
CTATTTTATTGCTTCGGGCACCCCTGAAGTCTATATTCCTTATCCTCCCCG  
GTTTCGGAATAATTTCCACATCATCGCCTACTACTCAGGTAAGAAAAGAAC  
CCTTCGGCTATATAGGCATGGTCTGAGCAATAATAGCTATCGGTTTCCTT  
GGGTTTATTGTATGAGCCACCACATATTTACTGTCGGAATAGACGTAGA  
TACACGAGCATA-----

-----  
-----  
-----  
-----  
-----  
-----  
-----  
-----  
-----  
-----  
-----  
-----  
-----  
-----  
-----  
-----  
-----

-----GGATGAGTACATCGTAGTGTTTCAGT  
CGCTCAACAACAAGACTCATTCTCAATGAAGCAGAACTGATTATGGCACT  
GTCCAGGAGTTTCAGATGAGGGTGGTCACTGTGTCCCTTGAAGAGCAAT  
CTTTCCCCAGTATAGTCCAGCTTATCAGTGGTGCCCAATGTTGGTTCAGT  
ATGCATGGGGCTCAGCTTGTCACCTCACTCTTCCCTCCCCAGAGGAGCTGT  
GGTGGTGGAGCTTTTCCCCTATGCTGTGAACCCAGAACAGTACACCCCTT  
ATAAAACCCTCACCTCCTTACCAGGGATGGACCTGCAGTATGTTTCTG  
AGGAATACGATGGAGGAAAACACCATCACCCACCCAGATAGATCCTGGGA  
CCAAGGAGGCATCGCCCACCTCGAAAAGGATGAGCAAGAGCGAATCCTTG  
CCAGCAAGGATGTCCCACGGCACCTGTGCTGCCACAACCCAGAATGGTTC  
TTCCGAATCTATCAGGACACTCTGGTGGACATCCCTTCATTTCTGGAGGT  
TCTCAA---AGATGGCCTGAAGATCACCAGACCAAACCTAAAAA---GG  
CCAAGCCAGCCAGCACAGTACATCCAGGCCGGGTCAGGGAAGCACAGTGT  
CAAACCTCAGTCCAAGCCACCAACGAAGCTAAACTCACGGTCTCCTGGCA  
GATCCCATGGAACCTGAAATACCTGAAGGTGAGGGAGGTGAAGTACGAGG  
TGTGGATCCGGAAGAGGGACACGAGCAAGGGAACCTGGAGGATCAAATC  
ATCCAGGCCAACCTGC ACTGGAGGCCCTTCGGGAACGCCAAGACCATTG  
CAACGACAACCTCGTCGCGCTTTGGCAAGTTCATCCGCATCCACTTTGGGA  
CGAGCGGCAAGCTGGCGTCCGCCGACGTTGAGACCTACCTGCTGGAGAAG  
TCACGCATCACCTTCAGCTCAAGGCCGAGCGAAACTACCACATCTTCTT  
CCAGATCCTGTCCCAAGAGAAGCCGGAGCTGCTGGAGATGCTGCTGATCA  
CCAACAACCCGTACGACTACAGCTACATCTCCAGGGCGAGGTGACGGTG  
TCGTCCATCAACGACAACGAGGAGCTGATCGCCACGGACAGCGCCTTCGA  
CGTGCTCGAGTTCACCCGGAGGAGAAGGCCTCATCTACAAGCTGACGG  
GCGCCATCATGCACTACGGCAACATGAGGTTCAAGCAGAAGCAGCGTGAG  
GAGCAGGCCGAGCCCAGCGCACCGAGGCCGCCGACAAGGCGGCGTACCT  
GATGGGGCTGAACTCGGCCGACCTCATCAAGGGACTCTGCCATCCCGGG  
TCAAGGTGGGTAATGAGTACGTCACAAAGGGCCAGGGTGTGGACCAAGTC  
TACTACCCCAACAAGGAGGCCTTCAAGTGTGAGGAGTGTGGCAAGCACTA  
CAATACCAAGCTGGGATAACAAGCGCCATGTGGCCATGCACTCAGCCACAG  
CGGGGGACCTCACCTGCAAGGTGTGCATGCAGAGCTATGAGAGCACGCCC  
GTGCTCCTGGAACACCTCAAGAGCCACTCGGGGAAGTCGTCGGGAGGCGC  
CAAGGAGAAGAAGCATCCGTGCGACCACTGCGACCCCGCTTCTACACGC  
GGAAGGACGTCCGGCGGCACATGGTGGTGCACACGGGACGGAAGGACTTC  
CTGTGCCAGTACTGCGCACAGCGCTTCGGCCGGAAGGACCACCTGACGCG  
CCACGTGAAGAAGAGCCACTCACAGGAGCTGCTAAAGATCAAGACGGAGC  
CTCCGGACATGCTGGGCCTGCTGGGCTCTGGCTCGCCCCCTGCTCCATC  
AAGGAGGAGCTCAGCCCCATGATGTGCAGCATGGGTCCCAACAAGGACCC

CATGATGGGCAAACCCCTTCCCCAGCGGGACCCCGTCCCCATGGGCATGT  
ACAACCCACACCAT-----CTCCAGGCCATGTCCAGTCCAGGGGTGGGG  
CACCCC-----CACCCCTCCCTGATGCCAGCTCCCTGTC---AGCCAT  
GGGCATGGGCTGCCACATGGACTATCTGATCTACGCTTCCTTCTCCTTCA  
TGGGATGTTTACAAATCAGCGATGGGTCAAACATCGTGAACCTGCTGGCA  
AGTAACCTCTCCGAGTGTGTCTTTTGGCGCTCACCCAGCAGAAGTACTTCAG  
TAACTACAGCCCTGTTATTGGGTTCTACATTTATGAACCCATTGAGTACT  
GGAACGCCACGGTGCAGGAGCACCTGAAGACACTGAGTCACGGCTTCAAC  
AAGATCTCCTGGATCGACAACCTTTTCCACTACCTGCGGGTGGTAAATGT  
GAGTGCCTCGACCAAGAACGACTTCATCACCATCCTGAAGGGCTCCTTCC  
TACGCAGCCCGGAGTACCAGCACTTCACTGAGGACATCATCTTCTCCAAG  
A---ACCGCAGAGCG-----ACGAGTACGACATCATCGCCTCTCGCAT  
GTACCTGGTGGCGCGCACCACAGAGAAGAAACGCGAGGAGGTGGTGGAGC  
TGTTGGAGAAGCTGCGTCCGCTGATGCTGATCAACAGCATCAAATTCATC  
GCCTTCAACCCACCTTCGTCTTCATGGACCGCTACAGCTCCTCGGTCAT  
ATCGCCCATCCTTACCTCAGGCTTCAGCGTGCTCACCATTCTCATCCTCA  
CGTTCTTTCTTGTATCAACCCACTGGGGAACCTTCTGGCTCATCCTGACG  
GTCACGTCTGTGGAGCTGGGCGTGTGGGTCTGATG-----

-----GCAA-----TCCC  
TGAGAAAGCAGTCCGTTTCTCTTTCACCATTATGTCCATCTCTGTGATGC  
CGGATGAGAAAGCA-----GAGGCG  
GTTACCATCTTTCACAGAGCCTAAGCCCAACTCCGAGCTATCCTGTAGGCC  
CCTCTGCCTGATGTTTGTGGATGAGTCGGACCACGAGATGCTCACTGCCG  
TCTTGGGGCCCGTTCGTCGAGAGCGGACTGCAATGACAGAAAGCCGACTT  
ATCCTGTCCATGGGTGGCCTCCCCGCTCATTCCGCTTCTACTTCAGAGG  
CACAGGCTATGATGAGAAGATGGTACGCGAGATGGAGGGCCTGGAGGCTT  
CAGGCTCTACCTATGTCTGCACTCTGTGTGACTCCACCCGGGCAGAGGCC  
TCTCACAACATGGTGCTCCATTCTATCACCCGACCCACAGCGAGAACCT  
GGAGCGCTACGAAATATGGCGGAGCAACCCCTTTTCGGAGTCTGTTGATG  
AGCTGCGAGATCGGGTGAAGGGGGTCTCCGCCAAGCCCTTCATGGAAACC  
CAGCCCACTCTGGATGCATTGCACTGCGACATTGGTAACGCCACTGAGTT  
CTACAAAATCTTCCAGGATGAGATCGGAGAGGTGTCCGGAAGGC---CA  
AC---CCCAGCCGCGAGGAAAGGCGCCGCTGGAGGGCTGCCCTTGACAAG  
CAGTTGAGGAAAAAACTCAAGCTCAAGCCGGTGTGCGGATGAATGGGAA  
CTATGCTCGGAGGCTGATGTCCGAGGAGACTGTGGACGTGGTGTGTGAAC  
TGGTGCCTCAGAGGAAAGGCGGGAGGCTCTGAGGGAGCTAATGGGGC---

-----TCCTACA  
CCATCGAGATGGGCCCCAAGGGCCCCTGTGGAAGGAGAGCCCGCAGCCC  
TTCACCTGTTCCATCGAGGACCCCACTAAACAGACCAAGTTCAAGGGCAT  
CAAGACGTACATCTCCTACCGGGTACGCCAAGCCACACGGGTACCCCTG  
TGACAGACGCTACAAGCACTTTGACTGGCTGTACAATCGCCTGCTGCAC  
AAGTTCACCGTGATCTCCGTCCCCACCTGCCAGAGAAGCAGGGGACTGG  
GCGCTTCGAGGAGGACTTCATAGAAAAGCGCAAGAGGGCGGTTGATCCTCT  
GGATAAACACATGACCAGTACCCTGTCTCTCCAGTATGAGGGGTTTC

GAACACTTCCTGATGTGTGGCGACGACAAGCAATGGAAGCTGGGCAAGCG  
GCGAGCAGAGAAGGACGAAATGATCGGTGCCCACTTCATGCTGACCTTCC  
AGATCCCCAACGAGCACCAGGATCTGCAGGATGTGGAGGAGCGCGTAGAC  
TCCTTCAAGGCGTTTGCCAAGAAGATGGACGACAGTATCATGCAGCTGAC  
ACACGTGGCCTCGGAACTCGTGCGCAAGCACCTTGGTGGGTTCCGCAAGG  
AGTTCCAGCGGCTGGGGAATGCCTTCCAGAACATCAGCCAGGGCTTCATG  
CTTGACCCACCACATAGCTCAGACAGCCTCAACAACGCCATCTCACAC--

-----GCCAAGTCCCGCTTT  
CACCCCTGGCGTGGGGAGCGCTGCTGGCACGGAGC---GCAGCGTCCCACT  
CAGCAACAGCTTGCTCTCTCCGCAACAAACCGAGGATCCCGCCGTCG---  
CCTCCCCGAGCGATGGTTTTGTCACCC---CTGCCAACAACCGACTGGAC  
TTCGCAGCCTCGGCATACGACGCCGCT-----GATTTCCGCCGTAA  
CGCGGCCACCTTGCTGTCGTACGCCGCGGCCGGAGTGAAGGCTC-----  
TCCCCTGCGGACCGCAGCGTGCTCCAACAGACCCCTGGGTTATTACGCG  
GACCCGTCGG---GCTGG---GGCGCGGCACGCCCTCCCAGTACTGT--  
-----AGCAAGTCGACCTCGGTCCTTTCTTGCTGGCCACGAATTCTG  
TAGGGAGCAGAACGGGCA-----CAAACCTACCTAG-----TGGAG  
GA---CGGATCGGACGC---CATCCCAACGGAGAGGTCCCG---AT---  
TAATGGCTCGGAGGAG---GCGAAAGCCAAAGACTT-----GTCCGA--  
-GWCTAGCTGGATAGAG---ACGCCATCTTCGATCAAATCAATTGACTCA  
AGTGATTCTGGCATCTTTG---AGCAAGCAAAGCGGAGACGAATTCACC  
GTCTGCCACACCA-----GTAACAGAAACGGTGTCTCCGTTGAGAT  
CTGAA-----



>Nanobrachium lineatum

-----GCCAACCCGGAGCCCTTCTGGGCGA  
CGACCAAATTTATAATGTGATCGTGACAGCCACGCTTTTGTAATGATCT  
TCTTTATAGTAATGCCTATCATGATTGGAGGATTCGGAAACTGACTAATC  
CCCCAATGATCGGAGCCCCAGATATGGCATTCCCCGTATAAATAATAT  
GAGCTTCTGGCTCCTACCACCATCTTTCCTCCTTCTCCTAGCTTCATCAG  
GCGTTGAAGCAGGGGCCGGTACTGGCTGAACAGTATATCCGCCGCTAGCA  
GGCAACCTTGCCCACGCTGGGGCCTCTGTTGACCTAACAATCTTCTCACT  
TCATCTAGCTGGTGTCTCATCAATTCCTGGTGCTATCAACTTTATCACAA  
CGATCATCAACATGAAGCCCCCAGCAATTACTCAATACCAAACCCCTCTA  
TTTGCTGAGCCGTAATGATTACAGCCGTAATCCTTCTCCTTTCACTCCC  
AGTCCTAGCCGCTGGAATTACTATGCTTCTAACAGACCCGAAACTTAAATA  
CCACCTTCTTTGACCCCGCTGGCGGGGAGACCCCATCCTCTACCAACAC  
CTATTCTGATTCTTCGGGCACCCCGAAGTCTATATTCTTATTCTTCCCGG  
CTTCGGCATGATCTCGCACATTGTTGCTTACTACTCAGGTAAGAAAGAAC  
CTTTCGGGTACATGGGCATGGTCTGAGCAATAATGGCCATTGGGTTCCTC  
GGCTTTATCGTCTGAGCTCATCACATGTTACCGTTGGAATAGACGTCGA  
CGCACGAGCGTA-----

-----GGATGAGTACATTGTTGTGTTTCAGT  
CGCTCAACGACGAGACTCATTCTCAACGAAGCAGAACTTATTATGGCACT  
GTCCCAGGAGTTTCAGATGAGGGTGGTCACTGTGTCCCTTGAAGAGCAAT  
CTTTCCCCAGTATAGTCCAGCTTATCAGTGGTGCCCTCATGTTGGTTCAGT  
ATGCATGGGGCTCAGCTTGTCACTCACTCTTCCCTCCCCAGAGGAGCTGT  
GGTGGTGGAGCTCTTTCCTATGCCGTGAACCCAGAACAGTACACCCCTT  
ATAAAACCCTCGCCTCCTTACCAGGGATGGACCTGCAGTATGTTTCCTGG  
AGGAATACGATGGAGGAAAACACCATCACCCACCCAGATAGACCTTGGGA  
CCAAGGTGGCATCGCCACCTGGAAAAAGACGAGCAAGAGCGAATCCTTG  
CCAGCAAGGATGTCCCGCGGCACCTGTGCTGCCACAACCCAGAAATGGTTC  
TTCAGAATCTACCAGGACACTCTGGTGGACATCCCTTCATTCTGGAAGT  
TCTCAA---AGATGGCCTGAAG---AGCAGACCAAGCTTAAAAAA---GG  
CCAAGCCAGCGAGCACAGTACACCCAGGACGGGTTCAGGGAAGCACAAATGT

CAAACCTCGGTCCAAGCCACCAACGAAGCTAAACTCACAGTCTCCTGGCA  
GATCCCATGGAACCTGAAG-----

-----TACCTGATCTACGCCTCCTTCTCCTTCA  
TGGGATGTTTACAAATCAGCGACGGGTCGAACATCGTCAACCTGATGGCG  
AGCAACTCTCCGAGCGTGGCTTTCGCGCTCACCCAGCAGAAGTACTTCAG  
TAATTACAGTCCCGTTATCGGGTTCTACATTTATGAACCCATCGAGTACT  
GGAATGCCACGGTGCAGGAGCACCTGAAGACACTGAGTCATGGCTTCAAC  
AAGATCTCCTGGATCGACAACCTTCTTCACTACCTGCGGGTGGTCAATGT  
GAGCGTGTGACCAAGAACGACTTCATCACCATCCTGAAGGGCTCCTTCC  
TGCGCAGCCCGGAGTACCAGCACTTCAACGAGGACATCATCTTCTCCAAG  
A---ACCGCGAGAGTG-----ACGAGTACGACATCATCGCCTCGCGCAT  
GTACCTGGTGGCGCGCACCACCGAGAAGAAGCGCGAGGAGGTGGTGGAGC  
TGCTGGAGAAGCTGCGTCCGCTGATGCTGATCAACAGCATCAAGTTCATC  
GCCTTCAACCCACCTTCGTCTTCATGGACCCTACAGCTCCTCGGTCAT  
ATCGCCATCCTTACCTCAGGCTTCAGCGTGCTCACCATCCTCATCCTCA  
CGTTCCTTCTCGTCATCAACCCGCTGGGGAACCTTCTGGCTCATCCTGACG  
GTCACGTCCGTGGAGCTGGGCGTGCTGGGTCTGATGGGCTACCACCCCTT  
TGAGTGGCCTCCGGCCCTCCCGAGCGTGTCCCCCTCTNGCCGCGTGGGAAT  
CATCGTCCGGCTTTCCTGGCTGGGCCGACTCGGTGGATGACTCGCCGGCGG  
ACACCATAAGCCGGAGGTTTCGCTACGATGTGGCCCTTGTGTCTGCTTTG  
AAGGACCTGGAGGAGGAAGTGATGGAGGGACTGAAAGAGTGCGGGCTAGA  
TGACAGTGCATGCACTTCNGGCTTCAGCGTAATGATCAAAGAGTCCTGCGA  
TGGCATGGGAGACGTCAGCGAGAAGCATGGCGGGGGCCTGCGATCCCCG  
AGAAAGCGGTCCGCTTCTCTTTCACGATTATGTCCATCTCTGTGACGCCG  
GACGGGAAAGCG-----GAGGCGGT  
CACCATCTTACGGAGCCGAAGCCCAACTCCGAGCTGTCCTGTAAGCCCA  
TGTGCTGATGTTTGTGGACGAGTCGGACCACGAGATGCTCACCGCCGTC



-----  
-----  
-----  
-----  
-----  
-----  
-----  
-----  
-----  
-----  
-----  
-----  
-----  
-----  
-----  
-----  
-----  
-----  
-----  
-----  
-----

-----TCAGGCGAAGTCACGGAGAGAGAAGTGGCGTTGGGGAT  
CAACCCGTTTCGCGGACGGGATGGGCGCCTTCAAGATCAACCACGGCTCCC  
ACGACATCGGCTCCGG---ACAGACGGCGTTCTCCTCGCAGGCG---CCC  
GGCTAC---GCGGCGGCCGCCCTGGGG---CACCACCA-----CCACCC  
GACCACGTCAGCTCG---TACTCCACGGCAGCCTTCAACTCCACCCGGG  
ACTTCTGTTCAGAAATCGGGGCTTCGGAGACGCCACCAG-----C  
GCCGCCAGCACAGTTTGTTCGCCCTCCGC---CGCGGGGAGTTT---C--  
----GCGGGGCC--CATGGACACTCGGATGCCGCGGGGCACCTGCTCTTCC  
CCGGGCTCCACGAA---CAAGCCGCGAGCCACGCGTCTCCAACGTTGTC  
AACGGCCAGATGCGGCTGGCTTTTTTCGGGGGACATGTACGGCCGGGCGGA  
CCAGTATGGCCACGTCACGAGCCCGCGGT---CCGACCACTACGCGTCGA  
CCCAGTTGCACGGCTACGGCCCCATGAACATGAACATGGCCGCG---CAC  
CACGGGGCCGGGGCCTTCTTTTCGGTACATGCGGCAGCCGATCAAGCAGGA  
GCTCATCTGCAAGTGGATCGAGCCGAGCAGCTGTCGAACCCCAAGAAGG  
CGTGCAACAAAACCTTTCAGCACGATGCACGAGCTCGTCACCCATCTGACG  
GTGGAGCATGTGGGGGGGCCCGAGCAGGCGAACACATTTGCGTCTGGGA  
GGACTGTGCTCGGGAGGGCAAGCCGTTCAAAGCCAAATATAAACTTGTGA  
ATCATATCAGAGTACACACTGGAGAAAAACCCTTTCCTGTCCCTTCCCC  
GNNN-----

>Nansenia ardesiaca

AGCCTTTTAAATCCGGGCCGAGCTAAGCCAACCGGGAGCCCTCCTGGGGGA  
CGACCAAATTTATAATGTTATCGTAACAGCACATGCTTTCGTTATAATCT  
TTTTTATAGTATGATGCCAATCATGATCGGCGGCTTTGGAAACTGATTAATT  
CCCCAATAATCGGGGCCCTGACATAGCCTTTCCCGAATAAATAACAT  
GAGCTCTGACTTCTGCCCCCTCTTTCCTTCTTCTCCTAGCTTCTTCCG  
GGGTGAAGCCGGAGCCGGGACAGGCTGAACAGTATACCCTCCTTTAGCA  
GGAAACCTTGCTCACGCAGGGGCTCCGTAGACCTAACCATCTTCTCCCT  
CCATCTCGCGGGTATCTCCTCAATCCTCGGGGCCATTAACCTTATTACAA  
CGATCATTAACATGAAACCCCAACCATCTCCCAATACCAGACCCCCATA  
TTCGCTGAGCAGTACTTATTACAGCAGTCCTTCTGCTCCTCTCTCTTCC  
CGTCTAGCTGCCGATATTACCATGCTACTGACAGACCGAAACTTAAATA  
CCACTTCTTTGACCCCGCAGGGGGAGGGGACCCCATCCTCTACCAGCAC  
CTGTCTGGTTCTTTGGCCACCCTGAAGTCTATATTTTAATTCTTCCCTGG  
CTTCGGTATAATCTCCACATTGTTGCTTACTATTCGGTAAAAAGAAC  
CTTTCGGCTACATAGGCATGGTTTGAGCAATGATGGCTATCGGGCTTCTA  
GGCTTATTGTCTGAGCCACCACATGTTTACCGTCGGAATGGACGTAGA  
CACTCGTGNNNN-----

-----  
-----  
-----  
-----





TCGCCAAGAAAATGGATGACAGTGTGCATGCAGCTGACGCACGTGGCATCA  
GAACTGGTGCAGAACCTCGGAGGATTCGGAAGGAGTTTCAGCGGCT  
GGGGAACGCATTCCAGTCCGTCCAGTCCAGGCATTCATGCTGGACCCCTCCTC  
ACAGCTCAGAGACCCCAACAACGCCANNNNNNNNN-----

-----  
-----  
-----  
-----  
-----  
-----  
-----  
-----  
-----  
-----  
-----  
-----  
-----  
-----  
-----  
-----  
-----  
-----  
-----  
-----  
-----  
-----

-----GCCAAATCTCGCTTTACCCCTGGCGTAGGGACTGGT  
CCTGGCACAGACC---GCAGCGTCCCACCTTAGTAACAGCTTGCTATCCCC  
GCAACAACCGAAGAGCACACAGTTC---CTTCCCCGCAGCGATGGTTTG  
TCACCC---CTGCCAATAACCGACTGGACTTTGCCGCCCTCGGCATACGAC  
GCCGCCCGCGCTGCTGATTTTGCCGGTAACCGGCCACCTTGCTGTCCTA  
CGCAGCGCTGGAGTAAAAGCAC-----TTCCCCGCCCACTGCTGGGT  
GTTCAAACAGACCTTTGGGTTATTATGCCGACCCATCCG---GCTGG---  
GGCACC CGCACACCTCCTCAGTACTGT-----AGTAAATCCAGCTC  
AGTGCTTTTCGTGCTGGCCACAAATGCTGTTGGAAGCAGAACAGGCA---  
CATCCAATTACCTGA-----CGGAAGA---TGGG---GACAC---C  
ATCCCCACGGAGAGTCTCCA---AT---CGTAGTGCCAGAGGAG---AC  
AAAACCAAAGACTT-----GTCCGA---ATCCAGCTGGATAGAG---A  
CGTCATCTTCAATAAAGTCGATAGATTCAAGTGATCTGGGATCTTTG--  
-AGCAGGCCAAACGGAGAAGAATTCGCCGTATCCACAACG-----  
-GTCTCGGAGACAGNNNNNNNNNNNNNNNNNNNNNNNNN-----ACAGGCGAGGTACACAGACAGAGAAGTG  
GCTTTGGGGATAAATCCGTTTCGCRGACGGGATGGGCGCTTTCAAAATCAA  
CCACAGCTCTCATGATCTGGGCTCCGG---GCAAACGGCGTTTTCTCCC  
AGGCT---CCCGGTAC---GCAGCGCCGCCTTGGGG---CACCATCA-  
-----CCACCCGACCCATGTCAGCTCY---TACTCCACC GCGCTTTCAA  
TTCCACCCGGGACTTTCTTTTTCGAAATCGGGCTTCGGAGACGCGACCA  
G-----CGCGCAACACAGCCTGTTCGCCCTCCGC---AGCGGGG  
AGTTT---T-----GCAGGGCCACATGGACTCGGATGCCCGGGACA  
CCTGCTCTTCCCTGGACTCCACGAG---CAAGCCGCGAGCCACGCGTCCT  
CCAATGTTGTGAACAGTCAGATGCGATTGGGTTTTTCGGGGGACATGTAC  
GGGCGGGCTGACCAATATGGCCATGTTACGAGCCCACGGT---CCGACCA  
CTACGCCTCGACCCAGTTGCACGGCTATGGTCCCATGAACATGAATATGG  
CCGCA---CACCACGGAGCAGGGGCCTTCTTCCGTTACATGAGGCAGCCG  
ATCAAACAAGAGCTSATCTGCAAGTGGGTGAGCCGGAGCAGTTGTCGAA  
CCCGAAAAGTCGTGCAACAAAACCTTTCAGCACGATGCACGAGCTCGTGA  
CCCACCTGACAGTGAACATGTGGGGGACCAGAGCAGTCGAACCATATT

TGCTTTTGGGAAGAGTGTGCGGAGAAGGGAAACCGTTCAAAGCTAAATA  
CAAACCTTGTAATCATATCAGAGTACACACCGGAGAGAAACCGTCCCCT  
GTCCGTTCCCCGGCTGTGGCAA

>Naso lituratus

AGTCTACTTATTCGGGCAGAACTAAGCCAACCAGGCGCCCTCCTCGGAGA  
TGACCAAATCTATAATGTAATTGTTACAGCACATGCTTTCGTAATAATTT  
TCTTTATAGTAATGCCAATTATAATTGGAGGGTTTGGAACTGACTAATC  
CCACTAATGATCGGGGCCCGGATATGGCATTTCCTCCGAATGAACAACAT  
GAGCTTCTGACTACTCCCTCCTTCTTTCCTTCTCCTTCTTGCATCATCTG  
GGGTTGAAGCTGGGGCCGGAACCGGATGAACAGTCTACCCCCCTCTAGCT  
GGTAACCTAGCACACGCAGGGGCTTCCGTTGATCTAACTATCTTCTCCCT  
TCATCTGGCAGGGATTTCCCTCAATTCAGGGGCAATTAATTTTATCACAA  
CTATCATTAACATGAAACCTCCTGCTATTTCTCAGTACCAAACCCCTCTA  
TTCGCTGAGCTGTATTAATCACGGCAGTACTGCTCCTTCTTTCTCTTCC  
AGTCCTTGCTGCTGGCATCACAATACTCCTCACCAGCCGAAACCTGAACA  
CAACCTTCTTCGACCCTGCAGGCGGAGGAGATCCGATTCTTTACCAACAC  
CTC-----  
-----  
-----  
-----

-----NNNCTAGAGAGAAACCTTACCCATCTAACTGTCCTGGCAT

GCTGTTGCTGTCTGACGCCACCAGTGCACCAAGCTGTCAGAGCTCTCCT  
GGGGCATGTGCTTGAGCAACTTCCCTGCTATTTGCAAGACAGAGGACTTC  
CTCCAGCTGCCCAAAGATATGGTAGTGCAGCTTTTGTACATGAAGAGCT  
AGAAACAGAAGATGAGAGACTGGTTTATGAAGCTGCCCTCAACTGGATCA  
ACTATGACTTGGAAAAGAGGCACTGCCACCTTCCAGAGCTCCTGAGAACA  
GTTTCGCTCGGCCCTCCTGCCTGCCATCTTTCTCATGGAGAATGTTTCTAC  
AGAGGAGCTGATCAACGCCCAGGCCAAGAGCAAAGAGCTAGTGGATGAAG  
CCATCCGCTGTAAGCTGAAGATCCTGCAGAATGATGGTGTTCGTTAACAGC  
CCGTGTGCTCGACCAAGAAAACCAGCCATGCCCTCTTTCTTCTAGGAGG  
GCAGACTTTTATGTGTGACAAGTTGTACCTGGTGGACCAGAAAGCCAAAG  
AGATCATCCCCAAGGCCGATATTCCCAGTCCCAGGAAGGAGTTCAGCGCC  
TGTGCCATCGGCTGTAAGGTGTACATCACCGGTGGAA--GAGGCTC-AGA  
GAATGGTGTGTCCAAAGATGTATGGGTCTACGACACTGTCCACGARGAAT  
GGTCGAAGGCAGCACCTATGCTCATTGCCAGGTTTCGGCCATGGCTCTGCA  
GAGCTGAAGCACTGCCTCTATGTGGTAGGAGTACACGGCTGCCACTGG  
CTGCCTCCCGGCCCTCCTCCGTCTGGATGAATACATAGTTGTGTTTAGTCGT  
TCCACAACAAGACTGATTCTGAATGAAGCGGAGGTAATCATGGCTCTGGC  
CCAGGAATTCAGATTAGAGTGGTACCGGTATCTTTGGAGGAACAGTCTT  
TCCCCAGTATTGTCCAGGTAATCAGCAGTGTACCATGTTAGTCAGCATG  
CATGGAGCTCAGCTAATTACCTCACTCTTTCTTCCAGAGGAGCTGCTGT  
AGTGGAACCTGTTCCCTTTTGTGCTGTTAACCCAGAGCAGTACACCCATATA  
AAACCTAGCGTCCCCTCCAGGCATGGACCTTCACTATATCTCCTGGAGG  
AACACTAAGGAAGAGAACACCATCACCCACCCAGACAGACCTTGGGAACA  
AGGGGGCATCAGTCACTTGGAAAAGAAGGAGCAAGAGAGAATACTGGCAA  
GCAAAGATGTCCCCAGGCACCTGTGCTGCCGCAACCCAGAGTGGCTCTTC  
CGTATCTACCAGGACACTTTAGTAGACATCCCTTCCCTTCCCTGGAAGTCCT  
CAA---AGAGGGCATGAAA---ACAAAGCCCAGCTTGAAGAA---GTCAA  
AGCCAGCCAGCACTGTTACCCAGGTCGAGTTAGAGAGCCCCAGTGTGAG  
ACCTCAGTACAAACCACTAATGAGGCTAAACTCACGGTCTCCTGGCAGAT  
CCCATGGAATCTGAAATACCTNNNNNNNNNNNNNNNNNNNNNNNNNNNNNN  
AACAAGGGGACACTGGA  
GGATCAAATCATCCAGGCAAACCTGCGTTAGAGGCCTTCGGCAACGCCA



AAACGGTAAGAAATGACAACTCATCTCGGTTTGGAAAATTCATCCGAATT  
CACTTTGGTACGAGTGGCAAGCTTTCGTCTGCTGATATTGAGACGTACCT  
GCTGGAGAAGTACAGTGTAACTTTCAGCTCAAGGCTGAGAGGAATTACC  
ACATCTTCTACCAGATCCTTTCCAATCAGAAGCCAGAGCTGCTCGACATG  
CTGCTGATCACTAACAAATCCATATGACTATTCTTACATCTCCCAAGGAGA  
GGTAACTGTGCGCATCCATCAATGACTCAGAGGAGCTGATGGCCACAGACA  
GCGCCTTCGATGTGCTTGGCTTTACCCTGAGGAGAAGATGGGAGTCTAC  
AAACTGACAGGCGCCATCATGCACTACGGTAATATGAAGTTTAAACAGAA  
ACAGCGTGGAGGAGCAGGCTGAGCCTGATGGCACCAGGCTGCTGATAAAT  
CAGCTTACCTAATGGGGCTGAACTCTGCTGACCTCATCAAAGGGCTGTGC  
CATCCCAGAGTCAAGGTAGGAAATGAGTACGTCACCAAGGGCCAAAAGTGT  
GGACCAAGTCAACTATCCCAACAAGGAGGCTTCAAGTGTGAGGAGTGTG  
GAAAGCATTACAACACAAAGCTAGGATATAAGCGCCATGTGGCCATGCAC  
TCTGCCACGGCAGGAGATCTCACCTGTAAAGTGTGCATGCAGTCGTACGA  
GAGCACACCAGTGCTCTTGGAGCACCTCAAGAGCCACTCTGGGAAGTCTT  
CAGGTGGCACCAGGAGAAAAAACATCCTTGGCACCCTGTGACCGTCGT  
TTCTATACACGCAAGGATGTGAGAAGGCACATGGTCGTCCACACGGGCCG  
AAAGGACTTCTATGCCAGTACTGTGCCCAACGCTTCGGTAGGAAGGACC  
ATCTGACACGCCATGTGAAGAAGAGTCACTCGCAAGAGCTGCTGAAGATC  
AAGACGGAGCCTCCTGATATGTTAGGCCTTCTAGCCTCCGGGTCACCACC  
TTGTTCTGTGAAGGAGGAGCTCAGCCCATGGTGTGCGGCATGGGTTC  
ACAAAGACCCCATGATGGGCAAACCTTTCCCCAGTGGGGCCCCTTTTCCG  
ATGGGCATGTACAACCCCCACCAT-----CTCCAGGCCATGTCTAATTC  
TGGGGTGGGTCAACCA-----CACCGTCCCTGATGCCAGTTCCTTGT  
CTGCAGCTATGAGCATGGGCTGTCACATGGAANNNNNNNNNNNNNNNNNNNNNNNNNNNNNNNNNNNNNNATGTTT  
ACAGATCAGTGA  
TGGATCAAATATCGTGAACCTGCTGGCTAGTAACTCTCCGAGTGTTTCGT  
ACGCTCTGACCCAGCAAATACTTTAGTAACTACAGTCCTGTGATTTGGG  
TTTTACATTTATGAGCCTATTGAGTACTGGAACCTCACGGTGAAGAGCA  
CCTGAAAACCTCTGAGTCATGGCTTCAACAAGATCTCCTGGATGGACA  
TTTTCCACTACCTGCGGGTAGTGAATGTAAGTGCATCAACTAAGAGCGAC  
TTCATCACCATCCTGAAAGGCTCCTTCCTGCGCAGCCCGGAGTACCAGCA  
CTTCACTGAGGACATCATATTCTCAAAGA---GCCGTGAGACTG-----  
ATGAGTACGACATTATTGCCTCACGGATGTACTTGGTGGCACGGACGACA  
GAGAAGAAGCGCAAGAGGTTAGTGGAGCTTCTGGAAAAGCTTCGTCCATT  
GATGCTGATCAACAGCATCAAGTTCATTGCCTTCAATCCGACATTTGTGT  
TCATGGACCGCTACAGTCCTCTGTCATCTCGCCATCCTGACCTCAGGA  
TTTAGCGTACTCAAACTCCTCATCCTCACNNNNNNNNNNNNNNNNNNNNNNNNNNNNNNNNNNNNNNNNNNNN  
NNNNNNNNNNNNNNNNNNNNNNNNNNNNNNNNNNNNNNNNNNNNNGGCTTTCACCAGTTTGAATGG  
CAGCCAGCTCTCAAGAATGTGTCTACATCTTGCAATGTTGGCATTATTAA  
TGGGCTCTCTGGAAGGGCTTCTCGGTGGATGACTCCCAGCTGACACCA  
TCACTCGGCGGTTTCGCTATGATGTGGCACTTGTGTGTCAGCATTAAAGGAT  
ATGGAGGAGGACATCATGGAGGGGCTGAGAGAGAAAAGAGATGGAAGACAG  
CATTTGCACCTCAGGCTTCAGTGTGATGATCAAAGAATCCTGTGATGGCA  
TGGGCGATGTGAGCGAGAAGCATGGCGGAGGACCAGTTGTTTCCTGAGAAG  
GCTGTGCGTTTTCTCTTTCACGATTATGTCTATTTCTGTCTTGGCAGATGG  
TGAAGAG-----GAAGAGGTACCA  
TCTTCACTGAGCCAAAGCCAAACTCAGAAGTGTCTGTAGGCCCCCTTTGC  
CTGACATTTGTGGATGAGTCAGACCATGAGACACTCACAGCCATCCTGTC  
GCCTTTAGTTGAGAGCGTGACGCGATGAAACACAGCAGGTTGATCTTAT  
CCATCGGTGGACTATCTCGCGCCTTCCGCTTTCACTTCAGGGGCACGGGA  
TATGACGAGAAGATGGTGCCTGAGATGGAGGGCCTCGAGGCTCGGGGT  
AACCTATGTCTGTACACTTTGTGACGCCGAACGGGCAGAGGCTCCCAA

























-----ACGGCATT TTC  
CTCCCAAGCT---CCCGGCTAC---GCAGCCGCTGCCCTGGGA---CATC  
ACCA-----CCATCCGACTCATGTCAGTTCT---TACTCTACTGCGGCT  
TTCAATTCCACCCGGGATTTTCTCTTCAGAAATCGAGGCTTCGGAGACGC  
CACCAG-----CGCTCAGCATAGTCTATTCGCCTCTGC---AG  
CGGGAAGTTT---T-----GCAGCCCCACATGGACACTCAGATGCAGCG  
GGACACCTGCTCTTCCAGGACTTCACGAA---CAAGCAGCGAGCCATGC  
TTCTCAAATGTTGTTAATAGTCAGATGCGATTGGGCTTTTCGGGGGACA  
TGTACGGCAGAGCCGACCAGTACGGCCACGTTACCAGCCCGCGGT---CC  
GACCACTATGCATCGACCCAGTTGCATGGCTATGGCCCTATGAACATGAA  
TATGGCCGCG---CATCATGGAGCAGGGGCCTTCTTCCGTTACATGAGGC  
AGCCGATAAAACAAGAGTTGATTTGCAAATGGATCGAACC GGAACA ACTA  
ACGAATCCAAAAAAGTCGTGCAACAAA ACTTTTAGCACAATGCACGAGCT  
CGTCACTCATTGACAGTGGAGCATGTAGGGGGACCGGAACAGTCAAACC  
ACATTTGCTTCT-----

>Neoscopelus macrolepidotus  
AGCCTCTTTATTCGGGCCGAGCTCAGTCAACCGGGAGCCCTCGTGGGGGA  
CGACCAGATCTATAATGTAATTGTAACAGCCCATGCCTTTGTAATAATTT  
TCTTTATGGTAATGCCTATTATGATTGGAGGGTTTGGAAACTGACTAATC  
CCCCTTATAATTGGAGCCCCCGACATAGCATTCCCCCGTATAAATAATAT  
AAGCTTCTGACTTCTCCCCCCTCTTTTCTCCTCTTTTAGCATCATCTG  
GTGTAGAAGCCGGAGCCGGGACCGGTTGAACAGTATACCCCCCCTTGCA  
GGTAACCTCGCCCATGCGGGAGCCTCTGTTGACCTAACAATTTTTTCACT



TACTACCCCAACAAGGAGGCCTTCAAGTGTGATGAGTGTGGGAAGCACTA  
CAACACCAAGCTGGGATAACAAGCGCCATGTGGCCATGCACTCCGCTACCG  
CCGGGGATTAAACCTGCAAGGTGTGCATGCAGAGTTACGAGAGCACGCCG  
GTTCTCTTGGAGCACCTCAAGAGCCACTCGGGAAAAGTCTTCGGGTGGTGC  
CAAAGAGAAAAAGCACCTTGTGACCACTGCGACCGACGTTTCTACTACTC  
GGAAGGATGTGAGACGGCATATGGTGGTCCATACAGGCCGCAAGGACTTT  
CTCTGCCAGTACTGTGCCAGCGGTTTGGCAGGAAGACCACCTGACGCG  
GCATGTGAAGAAGAGCCACTCGCAGGAGCTCCTAAAGATCAAGACAGAGC  
CTCCAGATATGTTGGGCTTGCTAGCGTCAGGGTCCCCGCCATGCCCTGTC  
AAGGAAGAGCTCAGCCCCATGATGTGTGGCATGGGGCCCAACAAAGACCC  
GATGATGGGTAAAGTCTTCCCCAGCGGTGCACCATTTCCCATGAGCATGT  
ACAACCCCACCAT-----CTCCAGGCCATGTCCAATTCTGGGGTGGCT  
CACCCG-----CACCCCTCCCTGATGCCAGTTCCCTGTCTGCAGCTAT  
GGGCATGGGCTGCCACATGGAATATCTCATCTACGCTTCCTTCTCCTTCA  
TGGGATGTTTACAAAATCAGCGACGGGTGCAACATCGTGAACCTGCTGGCG  
AGTAACTCTCCGAGTGTGTGCTACGCGCTCACCCAGCAGAAGTACTTCAG  
CAACTACAGCCCTGTGATTGGGTCTACATTTACGAACCCATCGAGTACT  
GGAACGCCACGGTGCAGGAGCACCTGAAGACACTGAGTCACGGCTTCAAT  
AAGATCTCCTGGATGGACAATTCTTCCACTACCTGCGGGTGGTGAATGT  
GAGCGCGTCAACCAAGAACGACTTCATCACCATCCTCAAGGGCTCCTTCT  
TACGCAGCCCGGAGTACCAGCACTTCACCGAGGACATCATCTTCTCCAAG  
A---ACGCGAGAGCA-----ACGAGTATGACATCATCGCCTCGCGCAT  
GTACCTGGTGGCGCGCACCACCGAGAAGAAGCGCGAGGAGGTGGTGGAGC  
TGCTGGAGAAGCTGCGTCCGCTGATGCTGATCAACAGCATCAAGTTCATC  
GCCTTCAACCCACCTTTCGTGTTTCATGGACCGCTATAGCTCCTCCGTCAT  
ATCGCCCATCCTTACCTCGGGCTTCAGCGTGTCTACCATCCTCATCCTCA  
CGTTCTTTCTCGTCATCAACCCGCTGGGGAATTTCTGGCTCATCCTGACG  
GTCACGTCCGTGGAGCTGGGCGTGTGGGTCTGATGNNNNNNNNNNNNNNNN  
NNNNNNNNNNNNNNNNNNNNNNNNNNNNNNNNNNNNNNNNNNNNNNNNNN  
NNNNNNGATGGACACCATCG  
GCGGGAGGTACCGCTACCACCTGGCGCTGGCGTCCGCATTGAAGGACCTG  
GAGGAGGACGTGATGGAGGGACTGAGAGAGCGAGGGCTGGAGGACAACAC  
CGGCACATCGGGCTTCAGCGTGATGATCAAAGAGTCTTGCAGCGCATGG  
GAGACGTGAGCGAGAAGCACGGCGGGGGCCCCCGTCCCCGAGAAGGCG  
GTGCGTTCCTTTTACCATCATGTCCGTCTCCGTGCGGCCGACGGGCG  
AGCG-----GAGCCGGTCACTATCT  
TCACGGAACCGAAGCCCAACTCGGAGCTGTCCTGTAAGCCCCTGTGCCCTG  
ATGTTTCGTGGACGAGTCCGACCACGAGATGCTCACCGCCGTCCTGGGGCC  
CGTGGTTCGCCGAGCGGAAGGCGATGACGGAGAGCCGGCTCATCCTGTCTA  
TGGGCGGCCTCCCCGCTCCTTCCGCTTCCAATTCGAGGCACCGGCTAC  
GACGAGAAGATGGTGCAGGAGATGGAGGGCCTGGAGGCCTCGGGCTCCAC  
CTACGTCTGCACCCGTGTGTGACTCCACCCGGGCGGAGGCCTCTCACACA  
TGGTGTCCACTCCGTCACCCGCAGCCACAGCGAGAACCTGGAGCGCTAC  
GAGATCTGGCGGAGCAACCCCTTCTCCGAGTCCGTTCGAGGAGCTGCGAGA  
TCGGGTGAAGGGGGTCTCCGCCAAGCCCTTTCATGGAGACCCAGCCACTC  
TGGACGCGCTGCACTGCGACATCGGCAACGCCACCGAGTTCTACAAAATT  
TTCCAGGACGAGATCGGGGAGGTGTTCAGAGGGC---CAAC---CCAC  
CCGCGAGGAGAGGCGGAGCTGGAGGGCCGCCCTCGACAAGCAGCTGAGGA  
AGAAAATTGAAGCTCAAGCCTGTGATGCGGATGAACGGGAACCTATGCCCGG  
AGGCTGATGTCCGAGGAGACCGTGGACGTGGTGTGCGAACTGGTGCCCTC  
GGAGGAAAGGCGGGAGGCCCTGAGGGAGCTAATGGGGCTTTACCTCCAGA  
TGAAACCCGTGTGGCGTGCCACCCACCCAGCCAAGGAGTGCCCTGACCAG  
CTGTGCCGCTACAGTTTCAACTCCAGCGCTTTGCGGACCTCCTCTCCAC

CACCTTCAAATATAGGTACGACGGAAAGATCACCAATTACCTGCACAAGA  
CCCTGGCCCACGTCCCTGAAATCATAGAGAGAGACGGCTCCATCGGAGCA  
TGGGCCAGCGAGGGGAACGAGTCAGCCAACAAATCATACACCATTGAGAT  
GGGCCCAAAGGGCCCCTGTGGCAGGAGAGCCCTCAGCCCTTCTCCTGTA  
ACATCGAGGACCCACCAAACAGACCAAGTTCAAGGGCATCAAGACGTAC  
ATCTCCTACCGGGTCACGCCGAGCCACACGGGTGACCCGTGTACAGACG  
CTACAAACACTTTGACTGGCTGTACAACCGCTTGCTGCACAAGTTCACCG  
TGATCTCCGTCCCCACCTGCCGAGAAGCAGGCGACCGGGCGCTTCGAG  
GAGGACTTCATAGAAAAGCGCAAGAGACGACTGATCCTCTGGATGAACCA  
CATGACCAGTCACCTGTCTCTCCAGTACGAGGGGTTCGAACACTTCC  
TGATGTGTGCCGACGACAAGCAATGGAAGCTGGGCAAGCGGGCAGAG  
AAGGACGAGATGGTGGGTGCCACTTCATGCTGACCTTCCAGATCCCCAA  
CGAGCACCAGGACCTTCAGGATGTGGAGGAGCGCGTCTGACTCCTTCAAGG  
CGTTTGCCAAGAAGATGGACGACAGTGTATGCAGCTGACACACGTGGCC  
TCAGAGCTCGTGCGCAAGCACCTTGGGGGGTTCCGCAAGGAGTTCAGCG  
GCTGGGGAACGCCTTCCAGAACATCAGCCAGGCCTTCATGCTGGACCCAC  
CACATAGCTCGGACGCCCTCAACAACGCCATCTCCACCCTCTCGCCACG  
TTCTCAAACACTGACCTCTCTGGGTTTTATCATCGGGCTCGGCGTGGTTCGG  
AAACCTCCTGATCTCCATCCTGCTGGTCAAAGACAAGAGCCTGCACCGGG  
CGCCCTACTACTTCTGCTGGACCTGTGCGCCTCCGACATCCTGCGCTCC  
GCCATCTGCTTCCCTTTCGTCTTACCTCGGTCAAGAATGGATCCGCCTG  
GACGTACGGCAGCTGACCTGCAAAGTGATCGCCTTCCCTGGGGGTGCTCT  
CCTGTTTCCACACGGCGTTTTATGCTGTTCTGCGTGAGCGTCACGCGATAC  
TTGGCCATCGCGCACCACCGTTTCTACACCAAGAGAGTGACCTTTTGGAC  
CTGTCTGGCCGTACATCTGCATGGTGTGGACGTTGTGCGTTGCGATGGCGT  
TCCCGCCGGTGCTAGACGTAGGGACGTA CTCTTTCATACGCGAGGAGGAC  
CAGTGCACGTTCCAGCACCGCTCCTTCAGGGCGAACGATTCGCTGGGCTT  
TATGCTCCTGCTGGCTCTCATCCTCCTGGCCACACAGCTGGTTTACCTCA  
AGCTCATCTTCTTCGTCCACGACCGCCGGAAGATGAAGCCCGTCCAGTTC  
GTGCTTGGCGTCAGCCAGA ACTGGACTTTCCACGGGCCAGGCGCCAGCGG  
GCAGGCGGGGCTAACTGGCTGGCCGGGTTTCGGTCGAGGCCCCACCCGC  
CTACCTTGCTGGGCATCCGGCAGAACAGCAACGCGGGGGCCGAGGCGT  
CTACTGGTGTGGATGAATTCAAAACGGAGAAGAGGATTAGTAGGATGTT  
CTACATCATGACGTTTTCTTCTCCTGGCGCTGTGGGGGCCCTATCTGGTTCG  
CCTGCTACTGGCGGGTGTGTTGCGAGGGGGCCCGTGGTCCCCGGGGTTAC  
CTGACGGCGGGCGTGTGGATGAGCTTTGCCAGGCCGGGGTCAATCCTTT  
CATCTGCATCTTCTCCAACAGGGAGGCCAAGTCCCGCTTCCACCCGGGCG  
TCGGGAACGCTCCTGGCACGGAGC---GCAGCGTCTACTCAGCAACAGC  
TTGCTGTCTCCGCAACAACCGAAGAACCCACTGTCG---CTCCCCACA  
GCGCTGGTTTTGTACCC---CCGCCAACAACCGACTGGACTTTGCAGCCT  
CGGCATACGATGCCGCT-----GATTTCCGCCGTAACGCAGCCACC  
TTGCTGTCTACGCAGCGGCTGGAGTGAAGGCTC-----TTCTCTGCC  
GACCGCAGGTTGCTCCAACAGACCTCTGGGGTATTACGCAGACCCGTCCG  
---GCTGG---GGAACACGCACACCCGCTCAGTACTGT-----AGC  
AAATCAGCCTCGGTCTCTCCTGCTGGCCCACGAATCTGTGGAGGCAG  
AACGGGCA-----CTAACTACCTGG-----CGGAGGA---TGGA-  
--GACGC---CATCCCCACGGAGAGATCCCCA---AT---GAACGGCTCT  
GAGGAG---ACCAAAGCCAAAGACTT-----GTCTGA---GTCGAGCTG  
GATAGAG---ACGCCATCTTCGATAAAGTCCATTGATTCAAGTGATTTCTG  
GAATCTTTG---AACAAAGCAAAGCGGAGAAGGATTTACCCGTCTGCTACA  
CCA-----GTTACAGACACTGTGTCCCCGTTAAAATCTGAG-----  
-----  
-----





GTCACCGTGTCCCTTGAAGAGCAATCTTTCCCCAGTATAGTCCAGCTTAT  
CAGTGGTGCCTCCATGTTGGTCAGTATGCATGGGGCTCAGCTTGTACCT  
CACTCTTCCTCCCCAGAGGAGCTGTGGTGGTGGAGCTCTTTCCCTATGCC  
GTGAACCCGGAACAGTACACCCCATATAAAACCCTCGCCTCCCTACCAGG  
GATGGACCTGCAGTATGTTTCCTGGAGGAATTTGAGGGAGGAAAACACTG  
TCACCCACCCAGATAGACCCTGGGACCAAGGAGGCATCGCCACCTGGAA  
AAAGACGAGCAAGAGCGAATCCTCACTAGCAAGGATGTCCCGCGGCACCT  
GTGCTGCCACAACCCAGAATGGTTTTTCCGAATCTACCAGGACACTCTGG  
TGGACATCCCTTCATTCCTGGAAGTTCTCAA---AGAGGGCCTGAAG---  
ACCAGACCTAGCTTAAAAAA---GGCCAAGCCAGCCAGCACAGTACATCC  
AGGCCGGGTGAGGGAAGCACAGTGTCAAACCTCGGTCCAAGCCACCAACG  
AAGCTAAACTCACAGTCTCCTGGCAGATCCCGTGGAACCTGAAATACCTG  
AAGGTGAGAGAGGTGAAGTACGANNNNNNNNNNNNAAGAAGGACACCAGTAAGGGAACCTTG  
GAGGATCAAATCATCCAGGCCAACCCCTGCGCTGGAGGCCTTTGGGAACGC  
CAAAACAGCCAGGAATGACAACCTCATCCCGTTTTGGAAAATTCATCCGGA  
TCCACTTCGGGACAAGCGGTAAGCTATCATCTGCTGACATCGAGACCTAC  
CTGCTGGAGAAGTACAGTGTACCTTTCAGCTCAAGGCCGAGAGGAAC  
CCACATCTTCTCCAGATTTTGTCCAATCAGAAGCCGGAGCTGTTGGACA  
TGCTGCTCATCACTAACAACCCATACGACTACTCCTACATCTCCCAAGGA  
GAGGTGACAGTAGCTCCATCAACGACTCTGAGGAGCTGATGGCCACGGA  
CAGCGCCTTCGATGTGCTCGGCTTCACTCAGGAGGAGAAGATGGGAGTCT  
ATAAGCTGACTGGTGCCATTATGCACTACGGCAACATGAAGTTTAAGCAG  
AAGCAGCGTGAGGAGCAGGCAGAGCCTGACGGCACTGAGGCTGCTGATAA  
GTCAGCTTATCTAATGGGGCTGAACTCTGCTGACCTCATCAAATGTCTTT  
GCCATCCCAGAGTCAAGGTAGGAAATGAGTATGTCACCAAAGGCCAGGGT  
GTAGATCAAGTCTACTACCCCAACAAGGAGGCCTTCAAGTGCGAGGAGTG  
TGGCAAGCACTACAACACCAAGCTGGGCTACAAGCGCCATGTGGCCATGC  
ACTCCGCCACGGCGGGGACCTCACTTGCAAAGTGTGCATGCAGAGCTAC  
GAGAGCACGCCCGTGTCTCCTGGAGCACCTCAAGAGCCACTCGGGGAAGTC  
CTCGGGAGGGCGCAAGGAGAAGAAGCACCCGTGCGACCACTGCGACCGCC  
GCTTCTACACGCGGAAGGACGTGAGCGGCACATGGTGGTGCACACGGGC  
CGGAAGGACTTCTGTGCCAGTACTGCGCGCAGCGCTTCGGCCGGAAGGA  
CCACCTGACGCGCCACGTGAAGAAGAGCCACTCGCAGGAGCTGCTGAAGA  
TCAAGACGGAGCCTCCGGACATGCTGGGTCTGCTGGGTCCGGCTCGCCG  
CCCTGCTCCATCAAGGAGGAGCTCAGTCCCATGATGTGCAGCATGGGTCC  
CAACAAGGACCCCATGATGGGCAAGCCCTTCCCCAGCGGGACCCCTTTCC  
CCATGGGCATGTACAACCCCCACCAC-----CTCCAGGCCATGTCCAGT  
CCCGGGGTGGGACACCC-----CACCCCTCCCTGATGCCAGCTCCCT  
GTCAGCGGCCATGGGCATGGGCTGCCACATGGAGTATCTCATCTACGCTT  
CCTTCTCCTTCATGGGATGTTTACAAATCAGCGACGGGTGCAACATCGTG  
AACCTGCTGGCGAGTAACCTCCTCGAGCGTGTGATGCGCTCACCAGCA  
GAAGTACTTCAGCAACTACAGCCCTGTGATTGGGTCTACATTTACGAAC  
CCATCGAGTACTGGAACGCCACGGTGCAGGAGCACCTGAAGACACTGAGT  
CACGGCTTCAACAAGATCTCCTGGATGGACAACCTTCTTCCACTACCTGCG  
GGTGGTGAATGTGAGCGCGTGCACCAAGAATGACTTCATCACCATCCTCA  
AGGGCTCCTTCTTACGCAGCCCGGAGTACCAGCACTTACCAGGACATC  
ATCTTCTCCAAGA---ACCGCGAGAGCA-----ACGAGTACGACATCAT  
CGCCTCGCGCATGTACCTGGTGGCGCGCACCACCGAGAAGAAGCGCGAGG  
AGGTGGTGGAGCTGCTGGAGAAGCTGCGTCCGCTGATGCTGATCAACAGC  
ATCAAGTTCATCGCCTTCAACCCACCTTCGTGTTTCATGGACCGCTATAG  
CTCCTCCGTATATCGCCATCCTTACCTCGGGCTTACGCGTGTCTACCA  
TCCTCATCCTCACTTTCTTTCTCGTCATCAACCCGCTGGGGAATTTCTGG  
CTCATCCTGACGGTACAGTCCGTGGAGCTGGGCGTGTGGGTCTGNNN-----





-----GGAAGATTACATTGTGGTCTTCTCT  
CGCTCCACAACAAGGTTGATCCTAAATGAAGCGGAGCTGATCATGGCGCT  
GGCCCAGGAGTTTCAGATGCGAGTCTTGACGGTGTCCCTGGAGGAGCAGT  
CTTTTGCCAGCATCGTGCAGGTGATCAGCGGAGCAGCCATGCTGTT CAGT  
ATGCACGGTGCTCAGCTCATCACAGCGTGTTCCCTGCCAGAGGTGCAGC  
CGTGGTGGAGCTGTTCCCTACGCCGTGAACCCGGAGCAGTACACCCCAT  
ATAAAACCCCTTGCCTCCCTGCCGGGCATGGACCTCCAGTACGTCTCCTGG  
AGGAACACAATGGAGGAGAACACCGTCACTCACCCGGACCGGCCCTGGGA  
CCAAGGGGGCGTTGTGCACCTGGAGAAGGAGGAACAAGAGCGCATACTAG  
CCAGCAAGGACGTCCCCAGGCACCTGTGCTGCCGTAACCCAGAGTGGCTT  
TTCAGAATCTACCAGGACACTTTGGTGGACATCCCTTCACTCCTCGAGGT  
GCTCAA---GGAGGGCCTCAGA---ACCAGGCCAACTTGAAAAA---GA  
GCAAGGCGGCCAGCACGGTTCACCCGGGGCGGGTCCGAGAACCCAGTGC  
CAGACCTCGGTCCAAGCCACCAACGAGGCCAAACTCACAGTGTCTGGCA  
GATCCCGTGGAACTGAAGTTCCCTGAAGGTGAGAGAGGTGAAGTACGAAG  
TG-----

-----CCCAACAAAGAGGCCTTCAGGTGCGAGGAGTGCGGCAAGCACTA  
CAACACCAAGCTGGGCTACAAACGCCATGTGGCCATGCACTCGGCCACGG  
CGGGCGACCTGACCTGCAAGGTGTGCCTGCAGAGCTACGAGAGCACGCCG









ACAAAACCTGGCCCTGTTACCAGGCATGGACCTCCAGTACGTGGCTTGG  
AGGAACACCATGGAGCAGAACTCGGTGGCTTACCCGAGCGCGCTGGGA  
CCAGGGTGGCATCGCCACCTGGAGAAGGAGGAGCAGGAGCGCATCCTGG  
CGAGCGACGACGTGCCGCGGCACCTGTGCTGCCGCAACCCAGAGTGGCTC  
TTCCGGATTTACCAGGACACCCAGGTGGACGTCCCTCCTTGCTGGAGGT  
CCTCCG---AGAAAATCTGAAG---GCCAAGCCTAACCTGAGAAA---GG  
CCAAGGCAGCTAGTACAGTACACCCCGGTAGAGTCAGGGAGCCCAAGTGC  
CAGACCTCGGTCCAGGCCACCAACGAGGCCAAGCTGACAGTGTCTGGCA  
GATCCCTGGAACCTCAAATACC-----  
-----AAGAAGGATGCCAGCAAAGGGACCTTGGAGGATCAAATC  
ATTCAAGCTAACCCAGCACTGGAGGCTTTTGGCAATGCCAAAACAGTGAG  
AAATGACAACCTCCTCACGCTTTGGGAAGTTCATTCGTATTCATTTTGGAA  
CGAGCGGCAAACCTCTCCTCTGCTGACATAGAAACTTACTTGCTTGAGAAA  
TCCCGTGTGACCTTTCAGCTCAAATCGGAGAGGAACTACCACATCTTCTT  
CCAGATATTGTCCAATGAAAAGCCAGAGCTGCTGGACATGCTGTTGATTA  
CCAACAACCCCTTATGATTATTGCTTCATCTCCCAAGGAGAAGTAACAGTT  
AAATCTATCAATGACAGTGAGGAGTTGCTTGCCACTGACAGTGCCTTTGA  
TGTGCTTGGCTTCACTCCAGAGGAGAAGATGGGGATCTATAAGTTGACAG  
GTGCCATTATGCACTATGGCAACATGAGGTTCAAGCAGAAGCAGCGTGAG  
GAGCAGGCAGAGCCTGATGGCACTGAGGCAGCTGACAAGTCAGCCTACCT  
GATGGGGCTTAACTCTGCTGATCTTGTGAAGGGACTCTGCCATCCAGGG  
TCAAAGTCGGCAATGAGTATGTAACAAAGGGACAAGGTGTAGATCAAGTC  
TATTACCCCAACAAGGAGGCCTTCAAGTGCAGAGGAGTGCAGGCAAGCTA  
CAACACCAAGCTGGGCTACAAGCGGCACGTGGCCATGCACTCGGCCACGG  
CGGGCGACCTCACCTGCAAGGTGTGCCTGCAGAGCTACGAGAGCACGCCG  
GCGCTGCTGGAGCACCTCAAGAGCCACTCGGGCAAGTCGTGCGGCGGCGC  
CAAGGAGAAGAAGCACCCGTGCGACCACTGCGACCGCCGCTTCTACACGC  
GCAAGGACGTGCGCCGCCACATGGTGGTGCACACGGGCCGCAAGGACTTC  
CTGTGCCAGTACTGCGCGCAGCGCTTCGGCCGCAAGGACCACCTGACGCG  
CCACGTCAAGAAGAGCCACTCGCAGGAGCTGCTGAAGATCAAGACGGAGC  
CTCCGACATGCTGGGCCTGCTGGGCTCGGGCTCGCCGCCCTGCGCCATC  
AAGGAGGAGCTCAGCCCCATGATGTGCAGCATGGGCCCCGCAAGGACCC  
CATGATGGCCAAGCCCTTCCCAGTGGCACCCCCCTCCCATGGGCATGT  
ACAACCCCAACCAC-----CTCCAGGCCATGTCCAACCCCGGAGTGGGC  
CAC-----CACCCTCCCTGGTGGCCGCTCCCTGTGCGCCGCCAT  
GGGGATGGGCTGCCACATGGAGTACCTGATTTACGCTTCCTTCTCGTTCA  
TGGGATGTTTACAAATCAGCGACGGATCCAACATAGTTAACCTTTTGGCC  
AGCGACTCGCCGAGCGTGTGTACGCTCTGACCCAGCAGAAGTATTTTCA  
CAACTACAGCCCAGTGATAGGGTCTACATCTATGAGCCCATTGACTACT  
GGAACGCCACTGTGCAGGAGCACCTCAAGACACTGGGCCAGGGGTCAAT  
ACGATATCGTGGATCGATAATTACTTTCAGTATCTGAAGGTGACGAACGT  
CAGCGCGTGCACCAAAAACGACTTCATCGCCGTCTCAAGACCTCGTTCC  
TGAGGAGCCCCGAGTATCAGCACTCACGGACGACATCATCTTTTCCAAA  
A---CGGGGG-----ACGACTTCAACATCATCGCGTCCAGGAT  
GTACCTGGTGGCACGGACCACAGAGAAGACCCGGGAGGAGGTGGTGGAGC  
TGCTGGAGAGGCTCCGGCCGCTCTCGCTCATCAACAGCATCAAGTTCATC  
GTGTTCAACCCACCTTCGTGTTTCATGGACCGCTACAGCTCCTCGGTCTGT  
CTCGCCATCATGACGTCCGGCTTCAGCGTCTGACCATCCTCGTGCTCA  
CGTTCCTCCTCGTCAACCCCTGGGAACTTCTGGTTGATACTGACC  
GTCACCTCCGTGGAGCTGGGAGTCTGGGCCTGATG-----  
-----  
-----  
-----







CTGTGCCAGTACTGTGCTCAGCGCTTCGGCAGGAAGGACCACCTGACGCG  
CCACGTGAAGAAGAGCCACTCGCAGGAGCTGCTGAAGATCAAGACGGAGC  
CTCCAGACATGTTGGGCCCTCCTGGCTTCAGGGTCGCCACCGTGCTCCGTG  
AAGGAGGAGCTTAGCCCCATGATGTGCGGCATGGGGCCCAACAAAGACCC  
CATGATGGGCAAAGCCTTCCCCGGCGGGGCCCTTTTCCAGTGGGCGTGT  
ACAACCCTCACCCAC-----CTGCAGGCCATGCCTCACCCCTGGGGCGGCT  
CACTCG-----CACCCGTCCCTGATGCCAGGCTCCCTGTCTGCGGCGAT  
GGGCATGGGCTGTCCCATGGACNNNNNNNNNNNNNNNNNNNNNNNNNNNNNTGTTTACAGATCAGT  
GACGGGTCAAATA

TCGTGAACCTGCTGGCGAGTAACTCTCCAAGTGTCTCATATGCTCTGACC  
CAGCAAAAATACTTACAGTAACTACAGTCCGGTCATTGGGTTTTTACATTTA  
TGAGCCCATCGAGTACTGGAACGCTACAGTGCAGGAGCACCTGAAGACTT  
TGAGTCATGGCTTCAACAAGATCTCCTGGATGGACAACTTTTTTCCACTAC  
CTGCGGGTGGTGAATGTGAGTGCATCAACCAAGAGCGACTTCATCACCAT  
CCTCAAGGGCTCCTTCCTGCGCAGCCCGGAGTACCAGCACTTCACTGAGG  
ACATCATTTTTTTCAAAGA---ACCGTGAGACAG-----ACGAGTACGAC  
ATCATTTGCCTCGCGGATGTACTTGGTGGCGCGGACTACAGAGAAGAAACG  
TGAAGAAGTGGTAGAGCTTCTGGAAAACTTCGCCATTGATGCTGATCA  
ACAGCATCAAGTTCATTTGCCTTCAATCCTACGTTTGTTGTTTACATGGACCGC  
TACAGTCCCTCGGTCATCTCGCCCATCCTGACCTCAGGATTCAGCGTACT  
CACAACTCCTCATCCTCACTTTGTTCCCTGGTCAACCCCTTGGNNNNNNNNNNNNNNNNNNNNNNNNNNNN  
NNNNNNNNNNNNNNNNNNNNNNNNNNNNNNNNNNNNNNNNNNNNNNNNNNNNNNNNNNNNNNNNNNNNNN  
NNNNNNNNNNNNNNNNNNNNNNNNNNNNNNNNNNNNNNNNNNNNNNNNNNNNNNNNNNNNNNNNNNNNNN  
-----

-----

-TCTTACACCATCGAGATGGGTCCCGTGGGGCCCCGATGGAARGAGAGCC  
CGCAGCCGTTCTCCTGCTCCGTTGAAGACCCACGAAACAGACAAAAGTTC  
AAGGGCATCAAGACGTACATTTTCATACAGGGTGACCCGAGCCACACCGG





CCAGCAAGGATGTCCCCAGGCACCTGTGCTGYCGCAAYCCGGAGTGGCTC  
TTCAGGATCTACCAGGACACTCTGGTAGACATCCCCTCCTTCTGGACGT  
CCTCAG---GGAGGGCCTGAAG---ACGAGGCCGAGCTTGAAGAA---GT  
CCAAGCCGGCCAGCACGGTTCACCCCGCCGGGTTCGAGAACCCAGTGC  
CAGACTTCGGTCCAAGCCGCCAACGAGGCTAAACTTACGGTGTCTGGCA  
GATCCCGTGGAACTTAAGTACCTGAAGGTGCGAGAGGTGAAGTACGA-G  
TATGGATCCGGAAGAAGGACACAAGCAAGGGAACCTGGAGGATCAAATC  
ATTCAGGCAAACCCCGCGCTGGAGGCTTTCGGTAATGCCAAAACACTGAG  
GAACGATAATTCTCCCGTTTTGGAAAATTCATCCGAATCCACTTTGGAA  
CCAGTGGTAAGCTGTCTTCTGCGGACATCGAGACCTACCTGTTGGAGAAG  
TCACGGGTACCTTTCAGCTGAAGGCAGAGAGGAACTACCACGTCTTCTT  
CCAGATCTTGTCCAATCAAAGCCAGAGCTGCTGGACATGCTGTTGATCA  
CCAACAACCCCTATGACTACTGCTACATCTCCCAAGGAGAAGTCACCGTA  
GCGTCCATCAATGATTCAGAAGAGCTGATGGCCACCGACAGTGCCTTCGA  
TGTGCTTGGCTTACGCAAGAGGAGAAGATGGGAGTCTACAAGTTGATAG  
GGGCCATTATGCACTTTGGCAACATGAGGTTCAAGCAAAGCAGCGCGAG  
GAACAGGCMGAGTCTGATGGCACAGAGGCTGCTGATAAGGCAGCTTATCT  
AATGGGGCTGAATACAGCAGACCTAATCAAGGGGCTCTGCCATCCCAGAG  
TCAAGGTAGGGAATGAGTACGTCACCAAAGGCCAGGGTGTAGATCAAGTC  
TACTACCCCAACAAGGAGGCCTTAAAGTGTGAAGAGTGTGGCAAGCACTA  
CAACACCAAGGTGGGATACGAGGTGGTGGTAGAGGAACAGTGGTTCCATA  
GGCGGGACCTCACCTGCGAAGTGTAAATGCAGAGTTACGAGAGCACCCCG  
GTGCTCCTGGAGCACCTCAAGAGCCACTCGGGGAAGTCCTCGGGCGGCGC  
CAAGGAGAAGAAGCACCCGTGCGACCCTGCGACCCTCGCTTCTACACGC  
GGAAGGATGTCAGGCGGCACATGGTCGTCCACACGGGCCGGAAGGACTTC  
CTGTGCCAGTACTGTGCCAGCGCTTTGGCAGGAAGGACCATCTGACGCG  
GCACGTGAAAAAGAGCCACTCGCAGGAGCTGCTGAAGATCAAGACGGAGC  
CTCCGGACATGCTGGGCCTGCTGGGCTCCGGCTCGCCTCCTTGCTCTGTC  
AAGGAGGAGCTGAGTCCCATGATGTGCAGCATGGGTCCCAATAAAGACCC  
CATGATGGGCAAAACCTTCCCAGCGGGACCCCTTCCCATGGGCATGT  
ACAACCCCCACCAC-----CTCCAGGCCATGTCTAATCCCGGGTGGGC  
CACCCC-----CACCCCTCCCTTATGCCAGTTCCTGTCTGCAGCTAT  
GGGCATGGGCTGTCATATGGAA-----

-----GGCTACCACACATT  
CGAGTGGCAGCCAGCCCTAAAAAATGTGTCCCCATCCTGCCACGTGGGTA  
TCATCAATGGGCTTTCGGGTGGGCAGCCTCGGTGGATGATGTCTTGCT  
GACACCATCACCCGTCGGTTCGCTATGACGTGGCGCTTGTATCGGCCCT  
GAAGGACTTAGAGGAGGACATCATGGAAGGACTGAGGGTGCATGGGCTGG  
AAGACAGCGCTTGCACTTCAGGCTTCAGTGTATGATCAAGGAATCCTGT  
GATGGCATGGGAGATGTCAGCGAGAAGCACGGCGGGGGCCAGCTGTGCC





-----  
-----  
-----  
-----  
-----  
-----  
-----  
-----  
-----  
-----  
-----  
-----  
-----  
-----  
-----  
-----  
-----  
-----  
-----  
-----  
-----

-----ACAGGCGAAGTCACAGAAAGAGAAGTGGCTTTGGGG  
ATAAATCCGTTTCGCGGACGGCATGGGCGCCTTCAAATAAACACAGCTC  
CCACGATATTGGCTCCGG--GCAAACGGCGTTTTCTCCAGGCG--C  
CCGGCTAC--GCGGCGGCCGCCCTGGGA--CACCATCA-----CCAC  
CCGACCCACGTCAGTCC--TATTCCACGGCAGCCTTCAATTCCACGCG  
GGACTTCTCTTCAGAAATCGGGGCTTCGGAGACGCCACCAG-----  
----CGCGCAGCACAGTCTGTTTCGCCTCCGC--CGCGGAAGTTT---T  
-----GCAGGGCCACACGGACACTCAGATGCCGCGGGCCACCTGCTCTT  
CCCCGGGCTTACAGAG---CAAGCCGCGAGCCACGCGTCGTCTAACGTCTG  
TGAACAGCCAGATGCGACTGGGCTTTTCCGGGGACATGTACGGCCGGGCC  
GACCAGTATGGCCACGTTACAAGCCCAGGT---CCGACCACTACGCTTC  
GACCCAGCTGCACGGCTATGGCCCTATGAACATGAATATGGCCGCT---C  
ACCACGGAGCGGGGCTTCTTTTCGGTACATGCGGCAGCCGATCAAACAA  
GAGCTGATCTGCAAGTGGATCGAACCAGGCAACTGTCGAATCCCAAGAA  
GTCGTGCAACAAAACCTTTCAGCACGATGCATGAGCTCGTGACCCACCTGA  
CGGTGGAGCATGTGGGAGGACCCGAGCAGTCGAACCACATTTGCTTCTGG  
GAAGATTGTGCCAGGGAAGGGAAACCGTTCAAAGCCAAATACAACTCGT  
AAATCATATCAGAGTTCACACCCGAGAAAACCGTTCCTCGTGTCCGTTCC  
CCGGCT-----

>Onuxodon parvibrachium  
AGTCTACTTATCCGGGCAGAATAAGCCAGCCTGGTGCTCTCCTCGGTGA  
TGACCAAATTTATAATGTAATCGTCACAGCACACGCATTCGTAATAATCT  
TCTTTATAGTAATACCGATCATGATCGGGGGCTTCGGGAATTGACTAATC  
CCGCTAATAATTGGTGCCCCAGACATGGCCTTTCCTCGAATGAATAACAT  
AAGCTTCTGATTACTTCCACCCTCTTTTCTTCTTCTACTGGCGTCATCAG  
GCGTAGAAGCCGGGCGGGAACCGGATGAACTGTCTACCCGCCCTTATCT  
GGCAACTTAGCCCACGCAGGGGCTTCTGTAGACCTAACAATTTTTTCTCT  
GCACTTAGCAGGCATTTCTCCATCTCGGGGCAATTAACCTTTATACCA  
CCATCATCAACATGAAACCCCTGCTATTTCTCAGTACCAGACACCCCTG  
TTCGTATGGGACAGTACTAATTACTGCAGTCCTTCTTCTCCTTTCTCTCC  
AGTCCTAGCGGCTGGTATCACCATGCTCCTAACTGATCGAAACCTCAACA  
CCACCTTTTTTGCACCAGCTGGGGGTGGGGATCCAATTCTATAACCAACAC  
CTA-----

-----  
-----  
-----

-----TTTCTAGAGAGAAACCTGCACCCGTCTAACTGCCTTGG  
CATGCTTTTGTGTCCGATGCCCATCAGTGTACCAAGCTGTCAGAGCTGT  
CCTGGGGCATGTGTCTCAGCAACTTCCCTGCTATTTGCAAGACAGAGGAC  
TTCCTGCAATTGCCCAAAGACATGGTGGTGCAGCTTCTGTACACGAGGA  
GCTGGAGACAGAAGATGAGAGACTGGTTTATGAAGCTGCCCTTAACTGGA  
TCAACTATGACCTGGAAAGGAGGCAC TGCCACCTCCCAGAGCTCCTGAGA  
ACAGTTCGTCTGGCTCTGCTGCCTGCCATCTTTCTCATGGAGAATGTCTC  
AACAGAAGAGCTGATCAATGCCCAGGCCAAGAGCAAGGAGCTTGTGGATG  
AGGCCATACGCTGTAACTGAAGATCCTGCAGAATGATGGCGTAATCAAC  
AGCCCATGTGCCCGTCCAAGAAAAACCAGCCATGCACTCTTTCTGTTGGG  
AGGGCAGACATTCATGTGTGACAAGCTGTACCTGGTGGACCAGAAAGCCA  
AAGAGATCATCCCCAAAGCTGACATCCCCAGCCCCAGGAAGGAGTTTAGT  
GCCTGTGCCATTGGCTGCAAGGTTTACATCACAGGTGGGA--GAGGTTT-  
AGAGAACGGTGTGTCCAAAGATGTATGGGTCTACGATACCGTCCATGAGG  
AATGGTCCAAGGCAGCACCCATGCTTATTGCCAGGTTTGGTACGGCTCT  
GCTGAGCTGAAACACTGCCTGTATGTGGTGGGAGGCCACACGGCAGCGAC  
TGGCTGCCTCCCGCCTCTC NNNNNNGGACAAATACATTTGTTGTCTTCAGTCTGTTT  
AGCAACAAGGCTAATCTTGAATGAAGCAGAGCTAATCATCGCACTGGCCC  
AGGAATTTTGAATGAAAGTTGTTACAATTTTCACTGGAGGAACAAACTTTT  
CCCAATATTGTCCAGGTGATTAGTGGTGTTCATGTTGGTTAGCATGCA  
TGGAGCCCAGCTCATAACCTCACTCTTCCCTACCTAGAGGAGCTGCTGTAG  
TTGAACTCTTCCCTATGCTGTGAATCCAGAGCAGTACACACCATATAAA  
ACCTGGCTTCTCTTCCAGGCATGGACCTACACTATGTCTCTTGGAGAAA  
CATCATGGAGGAAAACACAGTAACCCACCCAGACAGATCCCCGGAACAAG  
GGGCATAGTTCACTTTGAGAAGGATGAGCAGGAGCGCATACTGGCTAGC  
AAAGATGTTCCAGGCACCTGTGCTGCCGCAATCCAGAGTGGCTCTTTTCG  
GATCTACCAGGACACTTTGGTTGATATCCCTTCATTCCTGGAAGTCATCA  
A---AGAAGGCTTGAAG---ACCAAGCCTAGTTGGAAGAA---AGCCAAG  
GTGGCCAGCGCAGTTCACCTGGTTCGGGTGAGAGATGCCCAGTGTGAGAC  
CTCAGTGCAAACCAGCAGTGAGGCTAACTCACAGTTTCTTGGCAGATCC  
CATGGAATCTAAAGTACCTTAAGGTGAGAGAAGTGAAGTACGAGGTG---  
-----AAGAAAGACACCAGCAAGGGGACACTGGAAGATCAAATCATCCA  
GGCGAACCCAGCCCTGGAGGCTTTTGGGAATGCCAAAACAGCAAGAAATG  
ACAACATCATCCCGTTTCGGAAAATTCATTCGAATTCACCTTTGGAAACAGT  
GGCAAGTTGTATCTGTGACATTGAGACATATCTGCTGGAAAAATCACG  
TGTCACCTTTCAACTCAAGGCTGAGAGGAACTATCACATCTTCTACCAGA  
TATTATCAAATCATAAACCAGACCTGCTGGACATGCTGCTGATCACAAAT  
AACCCATATGACTACTCCTACATTTCTCAAGGGGAGGTAAGTGTGCGCATC  
AATCAATGATGCAGAAGAACTGATAGCCACAGACAGTGTCTTTGATGTTT  
TCGGCTTCACTCCAGAGGAAAAGATGGGTGTTTATAAGCTGACTGGTGCC  
ATCATGCACTATGGCAACCTCAAGTTCAAGCAGAAGCAACGTGAGGAGCA  
GGCCGAACCCGACAGCACGGAGGCTGCTGATAAATCGGCTTACCTAATGG  
GTCTGAACTCTGCAGACCTCATTAAGGGCTATGCCATCCCAGAGTTAAA  
GTGGGAATGAGTATGTTACCAAAGGCCAAAGTGTGGACCAAGTCTACTA  
TCCCAACAAGGAGGCCTTCAAGTGCAGGAGTGTGGCAAGCACTACAACA  
CCAAGCTGGGATACAAGCGACATGTGGCCATGCACTCTGCCACAGCAGGG  
GATCTCACGTGCAAGGTGTGCATGCAGAGCTACGAGAGCACGCCGTGCT  
CCTGGAACACCTCAAGAGCCACTCTGGGAAGTCTCGGGTGGCACCAGG  
AGAAAAAGCACCCGTGCGACCACTGCGACCGCCGCTTCTACACGCGGAAG  
GATGTGAGGCGGCACATGGTGGTCCACACGGGCCGCAAGGACTTCCGTGT  
CCAGTACTGTGCCAGCGCTTTGGCAGGAAGGACCACCTGACGCGCCACG  
TGAAGAAGAGCCACTCCCAGGAGCTGCTGAAGATCAAGACGGAGCCGCCG  
GATATGTTGGGTCTTTTAGCTTCGGGGTTCGCCCCGTGCTCTGTGAAGGA

GGAGCTTAGCCCCATGATGTGCGGCATGGGTCCAAATAAAGACCCCATGA  
TGGGAAAACCCTTCCCGAGTGGGGCCCCTTTTCCGATGGGCATGTACAAC  
CCCCACCAT-----CTCCAGGCCATGTCCAATTCGGGGTGGGCCACCC  
C-----CACGCCTCCTTGATGCCAGTCCCCTGTCTGCAGCTATGGGCA  
TGGGCTGCCACATGGAGTATCTCATCTACGCCTCCTTCTCCTTCATGGGA  
TGTTTACAAATCAGCGACGGCTCCAACATCGTCAACCTGCTGGCCAGCAA  
CTCCCCAGCGTGTCTACGCCTGACTCAGCAGAAGTACTTCAGCAACT  
ACAGCCCCGTGATCGGTTTTTACATCTACGAGCCCATCGAGTACTGGAAC  
TCCACCGTGCAGGAGCACCTGAAGACTCTGAGTCACGGGTCAACAAGAT  
CTCCTGGATGGACAACCTTCTTCCACTACCTGCGGGTGGTGAACGTGAGCG  
CCTCCACCAAGAGCGACTTCATCTCCATCCTCAAGGGTTCCTTCCTGCGC  
AGCCCGGAGTACCAGCACTTCACCGAGGACATCATCTTCTCCAAGA---A  
CCCCGAGACGG-----ACGAGTACGACATCATCGCCTCGCGGATGTACC  
TGGTGGCCCCGACCACGGAGAAGAAGCGCGAGGAGGTGGTGGAGCTGCTG  
GAGAAGCTGCGGCCGCTGATGCTGATCAACAGCATCAAGTTCATCGCCTT  
CAACCCCACCTTCGTCTTCATGGACCGCTACAGCTCGTCGGTGATCTCGC  
CCATCCTCACGTGGGGCTTCAGCGTGCTACCATCCTCGTCCTGACTTTC  
TTCTGGTTCATCAACCCCCCTGGGGAACTTCTGGCTCATCCTGACGGTCAC  
CTCCGTGGAGCTGG-----

-----TCCTACACTATT  
GAGATGGGCACCGTGGGACCCCTGTGGAAGAGAGCCACAGCCGTTCCTC  
TTGCTCCATTGAAGACCCCACAAAACAGACAAAGTTCAAGGGCATCAAGA  
CCTACATTTCTACAGGGTCACTCCGAGCCACACGGGGCAGCCCGTCTAC  
AGACGCTACAAACACTTTGACTGGCTGTACAACCGCCTACTGCACAAGTT  
CACTGTGATCTCAGTTCCACACTTGCCCGAGAAGCAGGCTACCGGGCGAT  
TCGAGGAAGATTTTCATCGAGAAGCGTAAAAGCGGGCTGATACTGTGGATG



ACTACGCGTCGACCCAGTTGCACGGCTACGGCCCCATGAACATGAATATG  
GCCGCG---CACCACGGAGCGGGGCTTCTTTCGATACATGCGGCAGCC  
GATCAAGCAAGAGCTCATCTGCAAGTGGATCGAGCCGGAGCAGCTGACGA  
ACCCCAAAAAGTCGTGCAACAAAACCTTTCAGCACGATGCATGAGCTTGTG  
ACCCATCTGACGGTGGAGCATGTGGGGGACCGGAGCAGACCAACCACAT  
CTGCTTCTGGGAGGACTGCCCNNNNNNNNNNNNNNNNNNNNNNNNNNNNNNN  
NNNNNNNNNNNNNNNNNNNNNNNNNNNNNNNNNNNNNNNNNNNNNNNNNNNN

>*Ophiblennius atlanticus*

AGCTTATTAATTTCGAGCAGAATTAAGCCAGCCAGGAGCTCTCTTAGGAGA  
TGACCAAAATTTACAATGTAATCGTTACAGCCCATGCCTTCGTTATAATTT  
TCTTTATAGTAATACCAATTATGATTGGAGGCTTTGGAAACTGACTTATT  
CCTCTTATGATCGGGGCCCTGATATAGCTTTCCCCGAATAAAACAATAT  
GAGCTTTTGACTTCTTCCTCCTTCCTTCCTTCTTCTTGCCTCTTCAG  
GTGTTGAAGCGGGAGCCGGGACAGGGTGGACTGTTTACCCCCACTTTTCG  
GGAAACTTAGCTCATGCAGGTGCATCTGTTGACCTTACCATCTTCTCCCT  
TCACCTGGCAGGGATCTCGTCAATTTTAGGTGCAATTAATTTTATTACAA  
CTATTATTAACATGAAACCTCCAGCCATTTCTCAGTACCAAACACCCTG  
TTTGTCTGAGCCGTTCTAATTACAGCTGTCCTTCTTCTTATCCCCTCC  
AGTGTTAGCTGCGGGC/CATCACTATGCTCTTAAGTACCGAAACCTAAACA  
CAACCTTTTTTTGATCCGGCTGGCGGGGAGACCCAATTTCTTACCAACAT  
CTT-----  
-----  
-----  
-----

-----TTCCTGGAGAGGAACCTTCACCCATCCAACCTGTCCTCGG  
TATGCTGCTTCTGTCCGATGCCCATCAGTGTACCAAGCTGTTCGGAGCTCT  
CCTGGGGCATGTGCCCTCAGCAACTTCCCCGCGATTGCAAAACAGAGGAC  
TTCTTCCAACCTGCCCAAAGATATGGTGGTGCAGCTTTTATCACATGAGGA  
ACTAGAGACAGAAGATGAAAGACTGGTTTATGAAGCTGCCCTCAACTGGA  
TCAACTATGACCTGGAAAGGAGGCACCTGTCATCTTCCAGAGCTCTTGAGA  
ACAGTCCGCCCTCGCATTGCTGCCATCTTTTAAATGGAAAATGTCTC  
AACAGAAGAACTCATCAATGCCCAAGCCAAGAGCAAAGAGTTGGTGGACG  
AAGCCATCCGCTGTAAGCTGAAGATCCTGCAGAATGACGGGGTCGTAAC  
AGTCCCTGTGCTCGACCAAGAAAAACAGCCATGCCCTCTTTCTCCTGGG  
TGGGCAGACTTTCATGTGTGACAAGTTGTACCTGGTTGACCAGAAAGCCA  
AAGAGATCATCCCGAAAGCTGATATCCCCAGCCAAAGGAAGGAGTTCAGC  
GCTTGCGCCATTGGCTGCAAGGTGTACATCACAGGCGGGC--GAGGCTC-  
TGAGAATGGAGTGTCCAAGATGTATGGGTCTATGACACCGTCCACGAGG  
AATGGTCAAAGGCTGCGCCGATGCTCATCGCCAGGTTTCGGCCATGGATCT  
GCAGAGCTGAAGCACTGCCTCTATGTTGTAGGAGGTCACACAGCCGCAAC  
CGGTGCTCCCGAGCTNNNNNNNNNNAGATGAATATATTGTTGTGTTAGTTCGACA

ACCAGGCTGATTTTAAATGAAGCTGAATTGATAATGGCCTTGGTTCAGGA  
GTTTCAGATGAAAGTTCGCTCACTGTGTCTTTAGAGGAACAGTCTTTTCCA  
GCATCGTCCAGGTGATCAGTCGTGCTTCCATGCTGGTCAGCATGCACGGA  
GCTCAGCTGATCACCTCACTGTTTCTGCCAGAGGAGCTGCTGTGGTGA  
GCTGTTCCCTTTGCAGTGAACCCAGAACAGTACACCCCATATAAACTC  
TGGCCCTCCCTCCCTGGCATGGACATTTACTANGTTTCTGGAGGAACACGA  
TGGAGGAGAACTGTCACCCATCCAGACAGACCCCTGGGAACAAGGAGGC  
ATTGCACATTTAGAGAAGGAGGAGCANGAGCGTATCCTGGCAAGCAAGGAT  
GTCCCAGACACCTGTGCTGCCGCAACCCGGAGTGGCTCTTCAGGATCTA  
CCAGGACACCAGGGTGGACATCAGTTCCTTCTTGGAGGTCCTGCG---GG  
AAGGCATGAAG---TCCAAGCCAAACCTGAAGAA---GTCCAAGGCAGTC  
AGCATCGTTCACCCGGGGCCGGGTCCGAGAGCCCCAGTGTTCAGACATCGGT

ACAGACAAGCAGCGAGGCCAAACTCACGGTTTCCTGGCAGATCCCGTGGAA  
ATCTGAAGTACCTCAAAGTCCGAGAGGTAAAGNNNNNNNNNNNNNNNNNAAGAAAGACACCAGCAA  
GGGACCCTGGAGGACCAGATTATCCAGGCCAACCAGCGCTGGAAGCCTT  
CGGTAATGCCAAAACATTACGAAATGACAACTCGTCCCGGTTTGAAAAT  
TCATCCGGATTCACTTTGGCNGAGTGGGAAGCTCTCGTCTGCTGACATCGA  
GACATACCTGTTGGAGAAGTCGCGAGTCACTTTTCAGCTGAAGGCTGAGA  
GAAACTACCATATCTTCTACCAGATCCTTTCCAATCAGAAGCCAGAGCTG  
CTGGACATGCTGCTGATCACCAACAACCCGTATGACTACTCCTACATCTC  
TCAGGGGGAGGTGACGGTTGCCTCCATTAACGACGCAGAGGAGTTGATGG  
CAACCGATAGCGCCTTTGACGTGCTGGGCTTTACGCCAGACGAGAAGATG  
GGCGTCTACAAGCTGACCGGCGCCATCATGCACTACGGCAACATGAAGTT  
CAAACAGAAACAACGCGAGGAACAAGCTGAACCTGACGGCACCGAAGCAG  
CCGACAAATCTGCCTACCTGATGGGGTTGAACTCAGCCGACCTCATCAAG  
GGACTGTGCCATCCCCGGGTCAAAGTGGGCAACGAGTACGTGACAAAAGG  
CCAAGGCGTGGACCAGGTGTACTACCCAACAAGGAAGCCTTCAAGTGTG  
AGGAGTGTGGGAAGCACTACAACACCAAGCTGGGATACAAGCGCCATGTG  
GCCATGCACTCTGCCACCGCAGGGGATCTAACCTGCAAAGTGTGCATGCA  
GAGCTACGAGAGCACGCCTGTTCTCCTGGAGCATCTCAAGAGCCACTCGG  
GGAAGTCTTCAGGCGGCGCAAGGAGAAGAAACACCCATGCGACCCTGT  
GATCGTCTGTTTTTACACACGAAAGACGTGCGACGGCACATGGTGGTCCA  
CACTGGTCTGAAAGGACTTCTGTGTCAGTACTGCGCGCAGCGCTTTGGCA  
GGAAAGACCATCTGACACGCCATGTGAAGAAGAGCCACTCGCAGGAGCTG  
CTGAAGATCAAGACTGAGCCTCCGGACATGCTCGGTCTTTTAGCTACGGG  
GTCCCCGCCATGCTCCGTGAAAGAGGAGCTCAGCCCCATGATGTGTGGCA  
TGGGCCCAATAAAGATCCTATGATGGGCAAACCATTTCCAGTGGAGCG  
CCTTTCCCGATGGGCATGTACAACCCCATCAT-----CTCCAGGCCAT  
GTCGAATTCCGGGGTGGGTCAACCA-----CACCTCCCCTGATGCCTG  
GCCCTTTGTCTGCAGCTATGGGCATGGGATGCCACATGGAGNATCTGATTT  
ACGCGTCTTTCTCGTTCATGGGATGTTTACAAATTAGCGATGGGTCTGAAT  
ATCGTGAACCTTGCTGGCGAGTAACTCTCCAGCGTTTCCTACGCGTTGAC  
CCAGCAGAAATACTTCAGTAACTACAGTCCCGTGATTGGGTTTTATATTT  
ACGAGCCCATCGAATACTGGAACCTCACGGTGCAGGAGCACCTGAAGACT  
CTGAGTCACGGCTTCAACAAAATCTCCTGGATGGACAATTTTTTCCACTA  
CCTGCGGGTGGTGAACGTGAGCGCCTCGACGAAGAGCGACTTCATCAGCA  
TCCTGAAGGGTCTTTTCCTTCGGAGCCCGGAGTACCAGCATTTACCGAG  
GACATCATATTCTCTAAGA---ACCGCGAGACTG-----ATGAATACGA  
GATCATCGCATCCAGGATGTACTTGGTAGCACGGACCACAGAGAAGAAGC  
GNGAGGAGGTGGTGGAGCTTTTAGAAAAGCTCCGCCCCCTGATGCTGATCA  
ACAGCATCAAATTCATTGCCTTCAACCCACCTTTGTGTTTATGGACCGA  
TACAGTCCCTCCGTATCTCACCCATCCTGACCTCAGGCTTACAGCTACT  
CACCATCCTCATCCTCACCTTCTTCTCGTATCAACCCCTTGGGAAACT  
TCTGGTTCATCCTCACGGTTACGTCCGTGGAGCTGGGCGTCTTGGGTTTA  
NNNGTTTTTACCAGTTTGAATGGCAGCCAGCTCTCAAGAATGTGTGCGACCAC  
TTGCAGTGTAGGCATTAATAATGGGCTCGCCGGTTCGCTTTCTCGGTGG  
ATGATGCCCCAGCTGACACCATCACTCGGCGCTTTCGCTATGATGTGGCG  
CTGGTGTGACGCTTAAAGGATCTGGAGGAGGACATCATGGAGGGATTGAG  
AGAGAATGGGATGGAAGACAGTGTGTCACCTCAGGCTTTCGTGTTATGA  
TCAAGGAATGCTGCGATGGCATGGGCGATGTCAGCGAGAAGCACGGCGGA  
GGACCAGCTGTTCTGAGAAGGCTGTACGTTTCTCTTTCACCGTTATGTC  
TGTCCTCGGTCTGCCAGACGAGGAGGAG-----  
-----GAGGAGGTTTCCATTTTCACTGAGCCAAAGCCAAACTCAGAA  
CTGTCTGTAAGCCTCTCTGCCTGATGTTTGTGGATGAGTCAGACCATGA  
GACACTCACAGCTGTCTGGGGCCGATCATCGCAGAGCGGAACGCAATGA

AAGAGAGCAGACTCATCCTGTCCATGGGAGGCTTACTTCGCTCTTTTCGC  
TTCCACTTCAGGGGCACGGGGTATGATGAGAAGATGGTGCGTGAGATGGA  
GGGACTGGAAGCCTCGGGTCTTATGTCTGCACGCTGTGTGACGCCA  
CTCGGACAGAGGCGTCTCACAACATGGTGCTGCACTCAATCACACGTAAT  
CACGAAGAGAACTTAGAACGTTACGAAATATGGAGAACGAATCCCTTTTC  
TGAGTCTGTGATGAGCTTCGAGACAGAGTCAAAGGGGTGTCTGCCAAAC  
CCTTCATGGAGACTCATCCCCTCTCGACGCGTTGCATTGCGACATCGGC  
AACGCCACCGAATTCTACAAAATCTTCCAGGACGAGATTGGGGAAAGTTTA  
CCAAAAGGT---CAAC---CCCAGCCGGGAGGAGCGGCGCAGCTGGAGGG  
CAGCCCTAGATAAACAGCTGAGGAAGAAGATGAAGCTTAAACCGGTAATG  
AGGATGAATGGAACTATGCCCGCAGGCTAATGACCCAGGAGGCTGTGGA  
GGTGGTGTGTGAGCTGGTGCCCTCAGAGGAGAGGAGGGAGGCCCTGAGGG  
AACTTATGAGGCTGTATATACAGATGAAGCCTGTGTGGCGTGCCACCTGC  
CCAGCAAAGGAGTGCCCGACCAGCTGTGCCGCTACAGCTTCAACTCACA  
GCGCTTTGCTGACCTCCTCTCCTCTACCTTCAAATATAGGTACAGCGGAA  
AGATAACCAACTATCTGCACAAGACCCTTGCTCACGTTCTGAGATCATT  
GAGAGAGATGGATCTATTGGAGCCTGGGCCAGCGAGGGTAACGAGTCAGC  
TAAACAAGTCATACACTATTGAGATGGGCACCCTAGGGCCCCAGTGGAAAG  
ACAACCCACAGCCTTTCAACTGCTCCATTGAAGATCCCACTAAACAGACC  
AAGTTTAAAGGGATCAAACCTACATTTTCATACCGGGTCACCCCGAGTCA  
CACAGCGCACCCGGTCTACAGACGCTACAAACACTTTGACTGGCTGTACA  
ACCGCCTACTGCACAAGTTCACTGTGATCTCTGTGCCCTCACCTGCCCTGAA  
AAGCAGGCCACGGCCGATTTGAGGAGGATTTTATCGAGAAGCGCAAGAG  
GCGACTGATCTTGTGGATGAACCACATGACCAGCCACCCTGTCTGTGCG  
AATACGAAGCCTTCGAGCACTTTCTCATGTGTGCTGACGACAAACAGTGG  
AAGCTGGGTAAGAGGCGGGCGGAGAAGGACGAGATGGTAGGCGCCATTT  
CATGCTGACTCTCCAAATCCCCAACGAGCACCAGGACCTTCAAGATGTGCG  
AGGAGCGGGTTGACAACCTCAAGGCCCTTTGCTAAAAAATGGACGACAGC  
GTGCTTACAGCTCACTCATGTTGCCCTCCGAGTTGGTGCGCAAGCATTGGG  
TGGATTACAGAAAGAGTTTACGCGACTGGGTAATGCTTTCCAGTCCATCA  
GCCAGGCTTTTCATGCTGGACCCTCCCCATAGGTCAGACACCCTCAACAAC  
GCCATCTCCCATNNNNNNNNNNNNNNNNNNNNNNNNNNNNNNNNNNNTGGGTTTCATCATTTGGAGTCGGTGTGG  
TGGGAAACCTC  
CTGATCTCCATCCTGCTGGTTAAAGACAAGAGCCTGCATCGAGCGCCCTA  
CTATTTCCCTGTTGGACCCTGTGCGCCTCTGATATCCTGCGCTCTGCCATTT  
GCTTCCCCTTTGTCTTCACCTCAGTCAAGAATGGATCTGCGTGGACCTAC  
GGCAGCTGACCTGCAAAGTGATTGCCTTCTGGGTGTGCTCTCCTGTTT  
YCACACGGCGTTCATGCTGTTCTGTGTCAGCGTCACCCGATACTGGCCA  
TCGCACATCACCGTTTCTACACCAAGAGGCTGACGTTCTGGACGTGCTTG  
GCTGTGATCTGCATGGTGTGGACACTGTGCGGTGGCTATGGCGTTCACC  
GGTGTGACGTTGGGCACCTACTCTTTTATCCGGGAGGAGGACCAGTGCA  
CATTCAGCACCGTTCCTTCCAGGGCGAATGATTCACCTGGGYTTTCATGCTC  
CTAYTGGCGCTCATCCTTCTTGCCACGCAGCTAGTTTACCTCAAGCTCAT  
CTTCTTCGTCCACGACCGTCGAAAGATGAAGCCTGTCCAGTTTCGTGCCTG  
CTGTCAGTCAGAACTGGACTTTCCATGGGCCTGGTGCTAGCGGGCAGGCG  
GCGGCCAACTGGCTGGCTGGATTTCGGTCGAGGTCCGACCCCGCTACKTT  
GCTGGGCATCCGACAGAACAGCAACGCAGCAGGCCGAGGCGTCTTCTGG  
TRCTAGATGAATTCAAAACMGAGAAGAGGATTAGTAGGATGTTCTACATC  
ATGACGTTTTTGTTCCTGGCGCTGTGGGGACCCTATCTGGTGGCCTGCTA  
CTGGCGGGTGTTCACGGGGCCCTGTAGTCCCTGGAGGCTACCTGACAG  
CAGCTGTGTGGATGAGCTTTGCNNNNNNNNNNNNNNNNNNNNNNNNNNNNNNNNNGC  
CAAATCTCGCTTTCACCCTGGCGTGG  
GGACTGGTCTGGCACGGAGC---GCAGCGTCCCCTCGGCAACAGCTTG



CTATCCCCGCAGCAAAGCGAGGAGCCACTGTTGCCACCCCCCGCAGCG  
ATGGTTTGTCACCC---CTGCCAACACCGACTGGACTTTGCTGCCCTCGG  
CATACGACGCCGCT-----GATTTTGCCGGTAACGCGGCCACCTTG  
CTGTCTACGCAGCGGCCGAGTGAAAGCTC-----TCCCTGCCGGC  
TGCAGGCTGCTCCAATCGGCCCTTGGCTATTACGCAGACCCGTCTG---  
GCTGG---GGAGGACGCACGCCGCGCAGTACTGCGGCGTCAATACGAAA  
TCCGGCTCGGTCTTTTCCTGCTGGCCGCCAACTCCATCGGTAGCAGAGC  
NGGCG---CC---AACTACCTGT-----CCGAGGA---GGGC---GA  
CTC---CATCACGACGGAGAGGTGCCCC---AT---CGGCGCGTCGGAGG  
AG---ACCAAACCCAAAGACATGAC---GTCCGA---GTCGAACTGGATA  
GAG---ACGCCGTCTCTATCAAGTCTATTGATTCCAGCGACTCTGGCAT  
CTTTG---AGCAGGCCAAACGGAGGAGAATCTCACCGTCGGCCACACCG-  
-----GTTTCAGAGACGGTGTCCCCGCTAAAAATNNNNNNNNNNNTTCAACAGAGGAAG  
TCACAGAGAGAGAAGTGGCGTTGGGAATAAATCCGTTTGTGGATGGGATG  
GGCGCCTTCAAAATAAACACAGCTCCCACGATATCGGCTCCGG---ACA  
GACGGCGTTTTTCTCCAGGCT---CCCGGTAC---GCGGCRGCTGCSC  
TGGGA---CACCATCA-----TCACCCGACCCACGTTGGCTCT---TAC  
TCCACGGCGGCTTTCAACTCCACCAGGGACTTTCTTTCAGAAATCGGGG  
TTTCGGAGATGCCACCGG-----GGCGCAGCACAGTTTGTTTCG  
CCTC-----CGGAAGTTT---T-----GCAGGGCCACACGGACAC  
TCAGATGCAGCGGGGACCTGCTCTTCCCGGGGCTGCACGAG---CAAGC  
GGCGAGCCACGCGTCTTCAACGTGGTCAACAGCCAGATGCGGCTGGGCT  
TCTCGGGGACATGTACGGACGGGCCAGTACGGCCACGTTACGAGC  
CCGAGGT---CCGACCACTAYGCCCTCACCAGCTGCACGGCTACGGCC  
CATGAATATGAACATGCCGCG---CATCAGGAGCAGGGCCTTCTTYC  
GATACATGAGGCAGCCGATCAAACAAGAGCTCATCTGCAAGTGGATCGAG  
CCGGAGCAGCTGACGAACCCCAAAAAGTGTGCAACAAAACTTTTAGCAC  
CATGCACGAGCTGGTGACCCACCTGACGGTGGAGCATGTGGGGGGACCGG  
AGCAGACCAACCACATYTGCTTCTGGGAGGAATGCTCCAGAGAAGGAAAG  
CCATTCAAAGCCAAATACAACTTGTAATCATATCACAGTTCACACCGG  
AGAAAAGCCCTTCCGTGNNNNNNNNNNNNNNNNNNNNNNNNNNN

>Opisthoproctus grimaldii

-----  
-----  
-----  
-----  
-----  
-----  
-----  
-----  
-----  
-----  
-----  
-----  
-----  
-----

-----GGAGAGAAACCTGCATCCGTCCAACTGCTTGGG  
CATGCTGCTGCTGTCAGATGCCACACGTCACCAAGCTCTCAGAGCTCT  
CCTGGGGCATGTGTCTCAGCAACTTCCCTGCAATCTGCAAGACAGAGGAC  
TTCTGCAGCTGCCAAGGACATGGTGGTTTCTCCTGTCCCATGAGGA  
GCTGGAGACTGAGGACGAAAGGCTGGTCTACGAGGCCGCTCTCAACTGGG

TCAACTACGACCTGGAGAGGAGGCACTGCCACCTGCCGGAGATGCTGAGG  
ACCGTCCGTCTGGCCCTGCTGCCC GCCATCTTCCTCATGGAGAATGTGTC  
CACGGAGGAGCTGATCAACGCCAGGTCAAGAGCAAGGAGCTGGTGGATG  
AGGCCGTCCGCTGCAAGCTGAAGATCCTGCAGAACGACGGCGTGGTCAAC  
AGTCTATGCGCCCGGCCAGGAAGACCAGCCATGCCCTCTTCCTGCTGGG  
CGGCCAGACCTTCATGTGTGACAAGCTGTACCTGGTGGACCAGAAGGCCA  
AGGAGATTATCCCCAAGGCAGACATCCCCAAGCCCCAGGAAGGAGTTCAGT  
GCCTGTGCCATCGGATGTAAGGTCTATGTCACAGGGGGGA--GGGGCTC-  
TGAGAACGGCGTGTCCAAAGACGTGTGGGTCTATGACACCATCCAGGAGG  
AGTGGTCCAAGGCAGACCCATGCTCATCGCCCGGTTTGGCCATGGCTCA  
GCAGAGCTGAAACACTGCCTCTACGTGGTTCGGAGGTCACACAGCTGCCAC  
AGGCTGCCTGCCCCCTCCCCATCT-----

-----AAGAGGGATCCAAGCAAGGTACCCTAGAGGATCAAATC  
ATTCAAGCTAACCCCTGCACTGGAGGCTTTCGGTAATGCCAAAACACTGAG  
AAATGATAAATTCATCACGTTTTGGCAAATTCATCCGTATTCATTTCCGAC  
AAAGTGGCAAATTGTCTCTGCTGACATAGAGACTTATCTGCTTGAGAAG  
TCACGTTGCACCTTTCAGCTGAAATCGGAGAGGAACACCATATCTTCTT  
CCAGATCTTGTCCAATCAAAGCCAGAGCTGTTGGACATGCTGTTGATCA  
CCAACAATCCATATGACTATGCCTACATCTCCAAGGAGAGGTGACTGTA  
GCATCCATCAATGATTCTGAGGAGCTGATTGCCACTGACAGTGCCTTTGA  
TGTGCTGGGCTTTACTGCAGAGGAGAAAATGGGGATCTACAAGTTGACAG  
GTGCCATAATGCACTATGGCAACATGAAGTTCAAGAACAAGCAGCGGGAG  
GAGCAGGCAGAGCCTGACGGTACAGAGGCTGCTGACAAATCAGCTTATCT  
AATGGGACTGAACTCTGCAGATCTTATTAAAGGACTGTGCCATCCAAGAG  
TCAAGGTTGGCAATGAGTATGTCACCAAAGGTGAGAGTGTAGATCAAGTC  
TACTAC-----



```

-----GCCAAATCTCGCTTT
CACCCCTGGCGTAGGGACTGGTCCTGGCACAGACC---GCAGCGTCCCACT
TAGTAACAGCTTGCTATCCCCGCAACAAACCGAAGAGCACACAGTTG---
CTTCCCCGCGAGCGATGGTTTTGTCACCC---CTGCCAATAACCGACTGGAC
TTTGCCGCGCTCGGCATACGATGCCCGCCGGCTGCTGATTTTGCCGGTAA
CGCGGCCACCTTGCTGTCCTACGCAGCGGCTGGAGTAAAAGCAC-----
TTCCCTGCCCACGGCTGGGTGTTCAAACAGACCTTTGGGTTATTATGCC
GATCCATCCG---GCTGG---GGCACCCGCACACCACCTCAGTACTGT---
-----AGTAAATCCAGCTCAGTGCTCTCGTGCTGGCCAACAAATGCTG
TTGGAAGCATTACGGGCA---CGTCCAATTACCTGG-----CGGAG
GA---TGGG---GACAC---CATCCCTACGGAAAGGTCTCCA---AT---
AAGAGTGCCAGAGGAG---CCAAAACCAAAGACTT-----GTCCGA--
-ATCCAGCTGGATAGAG---ACGCCGTCTTCAATAAAGTCGATAGATTCA
AGTGATTCTGGAATCTTTG---AGCAGGCCAAACGGAGAAGAATTCACC
GTCTGTACACCG-----GTTTCGGAGACAGTGTCCTCCCGCTGAAAT
CAGAGCATCACTCAACAGGCGAAGTCACAGACAGAGAAGTGGCTTTGGGG
ATAAATCCGTTTCGCAGACGGGATGGGCGCTTTTAAAATCAACCACAGCTC
TCATGATCTTGCTCCGG---GCAAACGGCGTTTTCCTCCCAAGCG---C
CCGGCTAC---GCAGCCGCTGCCTTGGGA---CATCATCA-----CCAT
CCGACCCATGTCAGCTCC---TACTCCACCGCTGCTTTCATTCACCCG
GGACTTTCTTTTTCGAAATCGGGGTTTCGGAGACGCGACCAG-----
----CGCTCAACACAGTCTGTTTCGCCCTCGGC---AGCGGAAGTTT---T
-----GCAGGGCCACATGGACTCAGATGCCCGGGACACCTGCTCTT
CCCAGGACTTCACGAG---CAAGCCGCGAGCCATGCGTCCTCCAATGTTG
TAAACAGTCAGATGCGATTGGGTTTTTCGGGGGACATGTACGGGCGGGCT
GACCAGTATGGCCATGTTACGAGCCCACGGT---CCGACCACTACGCTTC
GACCCAGTTGCATGGCTATGGCCCCATGAACATGAATATGGCCGCA---C
ACCACGGAGCAGGGGCTTCTTCCGTTACATGAGGCAGCCGATCAAACAA
GAGCTCATCTGCAAGTGGGTCGAGCCGGAGCAGTTGTGCAACCCGAAAAA
GTCGTGCAACAAAACTTTCAGCACGATGCACGAGCTCGTGACCCACCTGA
CAGTGAACATGTGGGGGGACCAGAGCAGTCAAACCATATTTGCTTTTG

```

GAAGAGTGTTGCCGAGAAGGAAAACCATTCAAAGCTAAATACAAACTTGT  
AAATCATATCAGAGTACACACYGGAGAAAAACCGTCCCATGTCCATTCC  
CCGGCTGTGGCAA  
>Opsanus pardus

-----  
-----  
-----  
-----  
-----  
-----  
-----  
-----  
-----  
-----  
-----  
-----  
-----  
-----  
-----  
-----  
-----  
-----  
-----  
-----  
-----

NNNNNNNNNNNNNNNNNNNNNNNCATTCCTAACTGCCTTGCCATGCTTTTGCTATTTGATGC  
TCACCAGTGTACCAAGCTATCAGAGCTGTCCTGGGGTATGTGCCCTCAGCA  
ACTTCCCTTCTATTTGCAAGACAGAGGACTTCCTTCAGTTACCCAAAGAT  
ATGGTGGTGCAGCTTTTGTACATGAGGAGCTGGAAACAGAAGATGAGAG  
ACTGGTTTATGAAGCTGCCCTGAACTGGATCAACTATGACCTAGAGAGGA  
GACACTGCCACCTCCAGAGCTTCTGAGAACAGTCCGTCTAGCGCTGTTG  
CCTGCCATCTTCTGATGGAGAATGTCTCGACGGAAGAGCTGATCAATGC  
CCAGGCCAAAAGCAAGGAGCTGGTGGATGAAGCGATCCGTTGTAAGCTGA  
AGATCCTGCAAAATGATGGCGTTGTTAACAGCCGTGTGCCCGGCCGAGA  
AAAACCAGCCATGCTCTGTTTTCTTCTGGGCGGGCAGACCTTTATGTGTGA  
CAAGTTGTACTTGGTGGATCAGAAAGCCAAAGAAATCATCCCAAAGGCTG  
ACATCCCCAGTCCAAGGAAGGAGTTCAGTGCCTGCGCTATTGGCTGTAAG  
GTGTATATCACTGGCGGGA--GAGGCTC-AGAGAATGGTGTATCCAAAGA  
TGTGTGGGCTTACGACACTGTCCACGAGGAATGGTCCAAGGCAGCGCCCA  
TGCTCATTGCCCCGGTTTGGCCATGGCTCTGCAGAGTTAAACACTGCCTC  
TATGTAGTAGGAGGGCATACTGCAGCAACTGGATGCCTCCAGCTTCTCC  
ATCCGGACGAATACGTTGTTGTGTTAGTTCGCTCAACAACCAGACTGATA  
CTGAACGAAGCCGAGCTCATCATGGCTCTGGCTCAGGAGTTTCAGATGAG  
AGTGGTGCAGGTTGTCCCCTGGAGGAACAGTCTTTTCCAGCATTGTCCAGG  
TGATCAGCGGTGCTTCCACGTTGGTTAGCATGCACGGAGCTCAGCTCATT  
ACGTCCCTCTTCCCTCCAGAGGAGCTGCTGTGGTTGAGTTGTTTCCCTT  
TGCTGTCAACCCGGAGCAGTACACCCATATAAAAACCTGGCCTCTCTTC  
CAGGCATGGACCTCCACTACATCTCCCTGGAGGAACACCATGGAGGAGAAC  
ACAGTCACCCACCCGGAGAGACCTGGGAGCAGGGAGGCATTGCTCACCT  
GGCGAAAGAGGAGCAAGAGCGAATACTGGCCAGCAAAGACGTCCCGAGGC  
ACCTGTGCTGCCGCAACGCAGAGTGGCTCTTCCGAATCTACCAGGACACG  
CTGGTAGACGTTCCCTTCTTTGGTGGAAAGCCCTCAG---AGAAGGCTTAAA  
G---ACGAAGCCCAATTGAAGAA---GGCGAAGACGGCCAGCACGGTCC  
ATCCGGGCCGGGTCAAGGAAAGCCAGTGTACAGCGTCTGTGCAGACCACC  
AGTGAGGCCAAACTCACAGTGTCTGGCAGATCCCGTGGAAACCTGAAGTA  
CCTGAAGGTGAGAGAAGTTAAGTACGAGGTGTGGATCCAGAAAAAAGACA  
CCAGCAAGGGGACGCTGGAAGATCAAATCATTACAGCGAATCCTGCACTT

GAGGCTTTTGGCAACGCCAAAACGGCAAGAAACGATAACTCTTCTCGTTT  
TGGAAAATTCATCAGAATTCACCTTGGAAACCAGTGGAAAGCTCTCGTCTG  
CAGACATCGAGACGTACCTGCTCGAGAAGTCACGCGTCACCTTCCAGCTC  
AAGGCTGAGAGGAACTACCACATCTTCTACCAAATCCTGTCCAATCAGAA  
GCCAGAGCTGCTGGACCTGCTGCTGATCACCAACAACCCATACGACTACT  
CCTACATCTCCCAAGGAGAGGTAACGGTGGCATCCATTAACGATCCGGAG  
GAGCTGATGGCTACAGACAATGCCTTTGATGTGCTGGGCTTCACTCCAGA  
GGAGAAGACGGCTGTCTACAAGCTGACCGGCGCCATCATGCACTACGGGA  
ACATGAGGTTTAAGCAGAAGCAACGTGAGGAGCAGGCTGAACCTGATGGG  
ACCGAGGCGGCCGATAAGTCGGCATACTTAATGGGGCTGAACCCCGCTGA  
CCTCATCAAAGGCCTGTGCCATCCCCGGGTCAAGGTAGGAAACGAGTACG  
TCACCAAAGGGCAGAGTGTGGACCAAGTCTACTACCCTAACAAAGGAGGCA  
TTCAAGTGTGAAGAGTGTGGGAAGCACTACAATACCAAGCTGGGATATAA  
GCGCCATGTGGCCATGCACTCAGCCACAGCAGGAGATCTCACCTGCAAAG  
TGTGTATGCAGAGCTATGAGAGCACACCAGTGCTCCTAGAGCATCTGAAG  
AGCCACTCGGGGAAAATCCTCAGGTGGCGCCAAGGAGAAAAAACACCCGTG  
TGATCACTGTGATCGCCGTTTTTACACGCGAAAGGATGTGAGACGACACA  
TGGTGGTACACACGGGCCGAAAGGACTTCCCTGTGCCAGTACTGTGCTCAG  
CGCTTTGGAAGGAAGACCATCTGACACGTACGTAATAAAAAAGCCACTC  
ACAGGAGCTGCTGAAGATCAAGACAGAGCCACCTGATATGTTAGGTCTTT  
TAGCTTCGGGCTCACCACCTTGCTCAGTGAAAGAGGAGCTTAGCCCCATG  
ATGTGTGGCATGGGTGCCAACAAAGACCCCATGATGGGCAAACCGTTTCC  
CAGTGGTGCACCTTTCCCATGAGCATGTACAACCCTCATCAT-----C  
TCCAGCCATGTCTAATTCTGGGGTTGGTCATCCA-----CACCCCTCT  
TTGATGCCAGTTCGCTGTCTGCAGCTATGNNNNNNNNNNNNNNNNNNNTACCTCATCTACGCGTCTT  
T  
TTCTTTCATGGGATGTTTACAGATCAGTGATGGGTCCAACATCGTAAACC  
TGTTAGCTAGCAACTCTCCGAGCGTGTCTGACGCTCTGACACAGCAGAAG  
TACTTCAGCAACTACAGTCCCGTGATTTGGATTTTACATTTATGAACCCAT  
TGAGTACTGGAACCTCACGGTGCAGGAGCACCTGAAGACTCTGAGCCACG  
GCTTCAACAAGATCTCCTGGATGGACAACCTTCTTCCACTACCTGCGGGTG  
GTGAATGTGAGCACGTCGACCAAGAGCGACTTCATCGCGATCCTCAGAGG  
CTCGTCTTGCGCAGTCCAGCATAACCAGCATTTCACAGAGGACATCATAT  
TCTCTAAGA---ACCGGGAGACTG-----ATGAGTATGACATCATTGCC  
TCACGCATGTACTTGGTGGCACGGACCACGGAGAAGAAACGTGAGGAGGT  
GGTGGAGCTTCTGGAGAAGCTTCGCCCATTTGATGCTCATCAACAGCATCA  
AGTTCATTGCCTTCAATCCCCTTTGTGTTTATGACCGCTACAGTTCT  
TCTGTCATCTCGCCCATCCTGACCTCAGGCTTCAAGTGTGCTCACCATCCT  
CATTCTCACCTTCTTCCCTGGTCATCAACCATTAGGGAACCTTCTGGCTCA  
TTCTGACGGTTACGTCCGTGGAGCTTGGCGTCTTGGGTTTGTGNNNNNNNNNNNNNNNNNNNNNNNNNN  
NNNNNNNNNNNNNNNNNNNNNNNNNNNNNNNNNNNNNNNNNNNNNNNNNNNNNNNNNNNNNNNNNNNNNN  
NNNNNNNNNNNNNNNNNNNNNNNNNNNNNNNNNNNNNNNNNNNNNNNNNNNNNNNNNNNNNNNNNNNNNN  
NNNNNNNNNNNNNNNNNNNNNNNNNNNNNNNNNNNNNNNNNNNNNNNNNNNNNNNNNNNNNNNNNNNNNN  
GCATTATTAATGGGCTTTCTGGACGAGCATCCTCCGTGGACGACATCCCA  
GTCGACACCATCACTCGCCGTTTTAGATATGATGTGGCGCTGGTATCAGC  
ATTAAAAGACCTGGAGGAGCATATCATGGAGGGGCTGACAGAGTGTGGAA  
TGGAAAGACAGCGCTTGCACCTCAGGCTTTCAGCGTCATGATCAAAGAATCT  
TGTGACGGCATGGGTGACGTCAGCGAGAAACATGGTGGGGGACCTGCGGT  
TCCTGAGAAGGCGGTACGCTTCTCATTCAGTGTATGTCTATCTCCCTCA  
TGGCAGACGGCGAGGAA-----AAG  
TCGGTTACCATCTATACTGAGCCAAAGCCAAACTCAGAACTGTCCCTGTAA  
GCCCCTTTGCCTGATGTTTGTGACGAGTCAGACCATGAAACCCCTCACAG  
CTGTCTGGGGCCAAATGTTGCTGAGCGTGAAGCGATGAAAGACAGCAGA  
CTCATTCTGTCAATGGGTGGCTTGCCTCGCTCCTTCCGCTTCTACTTCAG  
AGGCACGGGATATGATGAGAAGATGGTACGTGAACTGGAGGGCTAGAGG

CCTCAGGTTCCAGCTATATCTGCACGCTGTGTGACTCCAGTCGGGCAGAG  
GCCTCTCACAATATGGTGTGCTGCATGCCATTACCCGCAGCCATGAAGAGAA  
CCTGGAGCGTTACGAAATATGGAGAACTAATCCCTTTTCAGAGTCTGTCTG  
ATGAGCTGCGGGACCGTGTCAAAGGGGTCTCTGCCAAACCCTTTATGGAG  
ACCCATGCAACGCTGGATGCATTACACTGTGACATTTGGCAATGCCACTGA  
GTTCTACAAAATCTTCCAAGATGAGATCGGGGAAGTGTACAAAAAAGC--  
-CAAC---CCCACCCGTGAGGAACGGCGTAGCTGGAGAGCAGCCCTAGAT  
AAACAGTTGAGGAAGAAAATCAAGCTGAAACCAATAATGAGGATGAATGG  
GAACTATGCCCGGAAGCTAATGACCATGGAGGCGATGGAGGCGGTGTGTG  
AGTTGGTACCCACAGAGGAGAGGAGGGAAGGCCTGAGGGAGCTCATGAGT  
CTCTACATTCAGATGAAGCCTGTCTGGCGTGCCCTGTCCAGCCAAAGA  
ATGCCCTGACCAGCTGTGCCGCTACAGCTTTAACTCCCAGCGCTTTGCTG  
ACCTCCTGGCCTCCACATTCAAATATCGGTACAATGGAAAGATCACCAAC  
TACCTCCACAAGACGCTGGCTCATGTCCCTGAAATTGTTGAACGAAATGG  
GTCTATCGGAGCCTGGGCCANNNNNNNNNNNNNNNNNNNNNNNNNNNNTCGTACACTATTGAGATGGGTCCC  
TTGGGG

CCGAGATGGAAGGAGAATCCACATCCTTTCTCTTGTTCATTGAAGATCC  
AACAAAACAGACAAAAGTTTAAAGGCATCAAACGTACATTTTCGTACCGGG  
TCACGCCAAGCCACACAGGGCGTCTGTCTACAGGCGCTACAAGCACTTT  
GACTGGCTATAACAACCGGTTACTGCATAAGTTCACTGTGATCTCCGTGCC  
TCACCTTCCCAGAAACAGGCCACTGGGCGATTTGAGGAAGACTTCATCG  
AGAAGCGTAAGAGACGATTGATACTGTGGATGAACCACATGACTACTCAC  
CCGGTTCTCTCGCAGTATGAAGGCTTTGAGCACTTTCTCATGTGTGCTGA  
TGACAAGCAATGGAAACTGGGCAAGAGACGGGCAGAGAAGGATGAGATGG  
TGGGTGCCCATTTTCATGCTGACCCCTCAGATTCTTATTGAGCACCAGAC  
CTTCAGGATGTAGAGGAGCGAGTTGATTCTTCAAGACATTTGCTAAGAA  
AATGGACGATAGTGTTCATGCAGCTCACACTTGTACCTCGGAGCTGGTGC  
GCAAGCACCTTGGTGGATTTCAGGAAGGAGTTCCAACGGCTAGGAAATGCC  
TTTCAGTCTATCAGTCAGGCGTTCATGCTGGACCCCTCCCATTCTTCAGA  
GGCTCTCAATCATNNNNNNNNNNNNNNNNNNNNNNNCCGTTCTCAAACCTGACCTCCCTGGGTTTCATCATC  
GG

CGTCGGCGTGGTTCGAAACCTCCTGATTTCCATCCTGCTGGTCAAAGACA  
AGAGCCTGCACCGGGCGCCCTACTACTTCTGCTGGACCTGTGCGCTTCC  
GACATCCTCCGCTCGGCCATCTGCTTCCCCTTCGTCTTACCTCGGTCAA  
GAATGGGTCCGCTCGGAGCTACGGCACGCTCACCTGCAAAGTGATCGCCT  
TCCTGGGCGTGTCTCCTGCTTCCACACGGCGTTCATGCTCTTCTGCGTC  
AGCGTCACCCGCTACCTGGCCATCGCGCACCACCGTTTCTACACCAAGCG  
GTTGACCTTCTGGACGTGCCTGGCCGTCATCTGCATGGTGTGGACGTTGT  
CGGTGGCCATGGCGTTCGCGCCGGTGTGGATGTGGGGACGTACTCTTTT  
ATCCGCGAGGAGGACAGTGCACGTTCCAGCACCGCTCCTTCCGGGCGAA  
CGATTCCCTCGGCTTCATGCTCCTGYTGGCGCTCATCCTCCTGGCCACAC  
AGCTGGTTTACCTCAAGCTTATCTTCTTTCGTCCACGACCGTCGAAAGATG  
AAGCCCGTCCAGTTTGTGCCTGCCGTCAGCCAGAACTGGACTTTCCASGG  
GCCGGGCGCAAGCGGCCAAGCGGCGGCAACTGGCTAGCTGGATTCGGTA  
GAGGCCACCCCGCTACTCTGCTAGGCATCCGGCAGAACAGCAACGCG  
GCGGGCCGACGGCGTCTACTGGTGTGGATGAGTTTAAACGGAGAAGAG  
GATTAGTAGGATGTTCTACATCATGACGTTTTTCTTCTCCTGGCTCTGTGG  
GGCCCTACCTTGTGCGCTGCTACTGGCGGGTTTTTGCAGGGGGCCCCGTG  
GTCCCCGAGGGTATCTGACGGCGGCGTGTGGATGAGCTTTGCCCAAGC  
CGGGGTCAACCCTTTCATCNNNNNNNNNNNNNNNNNNNNNNGCCAAATCTCGCTTTCCTGCTGGCGTGGGG

A  
CTGGCCCTGGCACGGAGC---GCAGCGTCCCCTCGGCAACAGCTTGCTG  
TCCCCGCACCAAACCGAGGAGCCCACTGTTGCTTCCCCCGCAGCGATG





ACTGTGCGTCTGGCTCTCCTTCCCTGCCATCTTCCCTTATGGAGAATGTCTC  
TACGGAGGAGCTCATCATCGCAGAGGCTAAAAGCAAAGAGCTGGTAGATG  
AGGCCATCCGCTGCAAACGCGCATCTTGCAAAACGACGGCGTCGTCAAC  
AGTCTTGCGCCCGCCCCGCAAGACCAGTCATGCCCTTTTCTTGCTGGG  
CGCCCCACGTTTATGTGCGACAAGCTGTACCTGGTGGACCAGAAGGCCA  
AAGAGATCATTCCAAAAGCAGACATCCCCAGCCCAAGAAAGGAGTTCAGC  
GCCTGTGCCATTGGCTGCAAAGTGTACGTGACGGGTGGCC--GGGGCTC-  
AGAGAACGGAGTGTCTAAGGATGTTTGGGTGTACGATACATTACACGAGG  
AATGGTCCAAAGCGGCTCCGATGCTGATAGCACGTTTCGGTCATGGTTCC  
GCTGAGATGCGCCACTGCCTGTATGTCGTAGGAGGTCACACAGCTGCCAC  
NNNNNNNNNNNNNNNNNNNNNNNNNNNNNNCGATGACTACATTGTGGTTTTTAAACGTACCACTAACAGGCTCAT  
CCTTA

ATGAGGCAGAACTTCTTCTGGCTTTAGCCCAAGAGTTTCAAATGAGGACT  
GTCACTGTGTCTTTGGAGGAGCAGTCGTTTCGATAGCGTCATCCAAATGAT  
CAGTGGGGCGACTATGTTGGTCAGCATGCACGGAGCCAGATGGTCACCT  
CCATGTTCTTGCCCCGTGGTGGCGCTGTGGTTGAACTCTTCCCTTATGCT  
GTAAACCCAGAGCAGTACACTCCCTATAAAACCTTGGCCTCTTTGCCCGG  
CATGGACCTTTCAGTATGTCGCATGGAGAAATACCAATGAAATGAACACCG  
TTACATATCCCGATCGGCCCTGGGATCAGGGTGGCATCGTCCACTTGGAC  
AAAGAGGAACAAGAACGTATCCTCGCCAGCAAGGAGGTGCCGAGACATCT  
TTGTTGTCGTAATCCAGAGTGGCTTTTTTCGCATTTACCAGGACACTATTG  
TGGACATTGCCTCTTTTCTGGACGTACTTAG---AGAAGCTCTAAAA---  
---AGGCCAATCTCAAAA---GGCAAAGGTGGCTAGCACTGTACATCC  
TGGTCGAGTCAGAGAGCCCAAGTGTGACAGCTCGGTACAGGCCACCAATG  
AAGCAAAGCTCTCAGTGTGATGGCAGATTCCCTTGAATCTGAAGTACTTG  
AAGGTGAAAGAGGTGAAATATGAGGTGTGGATCCAGAAGAAAGACTCTAA  
CAAGGGAACCTGGAGGATCAGATTATTCAGGCCAATCCTGCACTCGAGG  
CTTTTGGCAATGCTAAAACGCTCCGAAACGACAACCTCCTCCCGCTTTGGG  
AAATTCATCCGCATTCATTTTTGCAACAAGCGGTAAACTCGCTTCAGCGGA  
TATCGAAACATACCTGCTGGAGAAGTCTCGGGTGCATTTTCAGCTGAAGT  
CGGAGGGAACCTACCATATTTTCTTCAAATACTGTCCAATGAAAAGCCT  
GAACTGCTGGACATGCTGTTGATAACTAATAATCCATATGACTACTCTTA  
CATCTCCAAGGAGAAGTAACCGTAGCTTCCATCAATGACAACGATGAGC  
TGATTGCGACCGACAAGGCATTTGATGTACTCGGCTTCACGTCCGAAGAA  
AAGATGGGAGTCTACAAGCTGACAGGTGCTATCATGCACTATGGCAATAT  
GAAATTCAAACAGAAACAGCGTGAGGAGCAGGCAGAGCCTGACGGTACTG  
AAGATGCAGATAAGGCGGCATATCTAATGGGGCTGAACTCTGCTGACCTG  
CTCAAAGGACTCTGCCATCCAAGGGTCAAGGTAGGCAATGAGTATGTCANNNNNNNNNNNNNNNNNNNNN  
NNNNNNNNNNNNNNNA

CAAGGAGGCCTTAAAGTGGCAGGAGTGTGGCAAACACTATAACACAAAAC  
TGGGCTACAAGCGCCACATGGCTATGCACTCAGCCACAGCCGGTGATCTT  
ACCTGTAAGGTGTGCTTGCAAAGCTACGAGAGCACGCCTGCACTCTTGGA  
GCACCTCAAGAGCCACTCAGGCAAGTCTTCAGGTGGAGCCAAGGAGAAGA  
AACACCCCTGTGACCACTGTGATCGTCGCTTTTACACACGAAAGGATGTT  
CGCCGACACATGGTGGTACACACGGGACGCAAAGACTTCCTGTGCCAGTA  
CTGTGCCCAACGTTTTGGGCGGAAGGACCATCTGACGCGACACGTCAAGA  
AGAGTCACTCGCAGGAGCTGCTGAAGATCAAGACGGAACCTCCGGATATG  
TTGGGTTTACTTGGGTCTGGTTCTCCACCATGTGCTGTGAAAGAAGAAAT  
AAGCCCTATGATGTGTAGCATGGGACCTACCAAGGACTCGATGATGGCAA  
AGCCTTTCACGGTGCCACCCCTTTTCCCATGGGCATGTACAACCCTCAT  
CAT-----CTCCAGGCCATGTCCAATTCGGGTGTGGGCCAC-----  
-CATCACTCATTGGTTCCCTGGGACTTTATCCACAGCTATGGGCATGNNNNNNNNNNNNNNNNNTACC  
TGATTTACGCCTCCTTTTCATTCATGGGATGTTTACAAATCAGTGTGGC

TCCAACATAATTAATCTGCTAGCTAGTAATTCACCCAGTGTGTGTCGTTTCGC  
CCTGACTCAACAGAAATACTTCAGCAACTACAGTCCTGTGATTGGGTTTT  
ACATCTACGAACCCATCGAGTACTGGAACCTCCACAGTGCAGGAGCACCTC  
AAGACATTGGGCCAGGGCTTTAATAAGATTTTCATGGATCGATAATTACTT  
CCACTATCTGAGGGTCGTTAATGTCAGCGCATCAACCAAAGTGATTTCA  
TTAACATCCTCAAGACTTCTTTTCTGAGGAGCCAGAATATCAACACTTT  
GTGGACGACATCATTTTCTCTAAAA---ATGGAG-----ATGA  
GTACGACATCATCGCGTCCAAGATGTACTTGGTGGCCAGGACGACCGAGA  
AGACCAGGGAGGAGGTCGTGGAGTTGCTGGAGAGACTTCGACCTCTCTCC  
CTTATAAACAGCATCAAGTTCATCGTTTTCAACCAACGTTTCGTGTTTCAT  
GGACCGCTACAGTTCCCTCCATCATCTCCCCATCTGACGTGGGGTTTCA  
GCGTGCTCACTATTCTCATCCTCACCTTCTTCTGGTCATTAACCCACTG  
GGAACTTCTGGTTGATCTTGACCGTCACCTCGGTGGAAGTGGGCGTCTT  
GGGTCTCANNNNNNNNNNNNNNNNNNNNNNNNNNNNNNNNNNNNNNNNNNNN  
NGCATCATTGACGGCCTCTCTGGTTGGACAACCTTTGTTGAGG  
ATGTCCCTGCAGAGACCATCGCCAGACGATTCCGCTATGATGTGGCACTG  
GTTTCTGCATTAAGAACCTGGAGGAGGACATAATGGAAGGACTAAGAGA  
GAGGGGGCTGGATGACAGCATGTGCACCTCGGGCTTACTGTGGTGGTGA  
AAGAATCATGTGATGGTATGGGAGATGTCAGTGAGAAGCATGGAAGTGGT  
CCAGCGGTTCTGAGAAGGCAGTGAGGTTTTCTTCACAATCATGTCCAT  
CTCCATCCGAGTTGAGGGTGAGGAC-----  
-----GATGGCATCACCATCTTCCAAGAACAAAAGCCAAACTCTGAGCTC  
TCTTGTAGACCTTTGTGCCTCATGTTTGTGGATGAGTCCGACCACGAGAC  
CCTGACAGCTATCTTGGGACCTGTGGTAGCAGAGCGAAAAGCCATGATGG  
AAAGTCGGCTCATCATATCTGTTGGTGGTCTGCTACGCTCATTTAGGTTT  
TTCTTCCGGGGCACAGGCTATGATGAGAAGATGGTTCGTGAAATGGAAGG  
GCTAGAAGCATCAGGCTCCACTTATATATGCACACTCTGCGACTCAACCC  
GAGCTGAAGCCTCTCAAACATGGTCTTACATTCCATCACACGTAGCCAC  
GATGAAAATCTTGAACGCTATGAGATCTGGAGGACAAATCCTTCTCAGA  
GTCCGCAGATGAACTCCGTGACCGGGTCAAAGGTGTTTCCGCCAAGCCTT  
TCATGGAGACCCAGCCTACTCTGGATGCCCTGCACTGCGACATAGGCAAT  
GCGACTGAATTCTACAAGATCTTTCAGGATGAGATCGGCGAAGTCTACCA  
GAGGAG---CAAT---CCGAGTCGAGAGGAACGCCGTCGTTGGCGGTCAA  
CCCTGGACAAGCAGCTACGAACATAAATGAACTGAAGCCTGTGATGAGG  
ATGAATGGAACATATGCCCCTCGGCTGATGACACGTGAGGCTGTGGAGGT  
GGTCTGTGAGCTGGTCCCTTCCGAGGAACGACGTGAGGCACTACGGAGAC  
TGATGGAACCTTACCTCCAGATGAAGCCGGTGTGGCGTTCACCTGTCCC  
TCCCAGACTGCCCTGACCAGCTCTGCCGATATAGCTACAACCTCTCAGCA  
ATTTGCTGACATCCTTTCACCACATTTAAGTACCGCTATGATGGAAAAA  
TTACCAACTACCTCCACAAGACTCTGGCTCATGTTCTGAGATTGTTGAG  
AGAGACGGGTCTATTGGAGCATGGGCCAGTGAAGGGAATGAGTCTGGAAA  
CAAGTCGTACTCCATTGAAATGGGCCCCGGGGCCGAGTGGAAAGGAGA  
GCCCTCAACCCTTCTCCTGTTCCATTGAAGACCCACCAAACAGACGAAG  
TTCAAAGGTATTAAGACGTACATCTCGTACCGCGTGACCCCAGCCATAC  
TAGCAGGCCAGTTTACCGCCGCTACAAGCACTTTGACTGGCTGTACAACA  
GACTACTGCACAAATTCACAGTGATTTCTGTGCCGCACCTCCCCGAGAAA  
CAGGCCACTGGACGGTTCGAGGAAGACTTCATCGAGAAGAGGAAGAGGAG  
GCTCATTTTATGGATGGATCACATGACCAGCCACCTGTGCTGTCCAGT  
ATGAGGGTTTGAACACTTCCTCATGTGCGGAGACGACAAACAGTGGAAA  
CTCGGGAAGAGACGGGCAGAGAAGGACGAGATGGTTGGGGCTCATTTTCAT  
GCTCACCTTCCAGATTTCCAACGAGCACCAGGACCTTCAGGACGTGGAGG  
AGCGTATTGACTCCTTCAAGGCGTTCGCCAAAAAGATGGACGACAGTGTG  
ATGCAGTTGACGCACGTGCGCTCGGAACTAGTCCGCAAACATCTTGGAGG

ATTCCGGAGGGAGTTCCAGAGGCTGGGGAACGGCTTCCAGTCCATCAGCC  
AGTCATTCCTGCTGGACCCTCCTTACAGCTCGGACGCCCTGAGCAACGCC  
ATCTCGCAC-----  
-----  
-----  
-----  
-----  
-----  
-----  
-----  
-----  
-----  
-----  
-----  
-----  
-----  
-----  
-----  
-----  
-----  
-----  
-----  
-----  
-----  
-----  
-----GCCA  
AGTCCCGCTTTACCCCTGGCGTCCGAGGCGCTCCTGGCACGGACC---GC  
AGCGTCCCACTTAGTAACAGCTTGCTCTCCCCGCAACAAACCGAGGAGAC  
CACGGTGG---CCTCCCCGAGCGATGGTTTGTCACCC---CTGCCAACA  
ATCGACTGGACTTTGCCGCTCGGCATACGATGCTGCCGCGGCTGCTGAT  
TTCGCCGTAACGCGGCCACCCTTCTGTGCTACGCAGCTGCCGGAGTTAA  
AGCGC-----TGCCCCGCCCCGGGCGGGATGCTCCAACAGACCTCTGG  
GGTATTACGGCGAGCCGCCG---GGTGG---GGCACGCGCACGCCACCG  
CAATATTGC-----AGCAAGTCCAGCTCCGTCTCTCGTGCTGGCC  
GTCCAACTCCGTAGGAGCAGAACGACCT---CGTCCAGTTACCTGGTCC  
CTGGCCTCGAGGA---CGGA---GACGC---CATCGCGCCCGAGAGGTCA  
CCG---CT---AGGCGGAGCGGATGAG---TCCAAACCCAAAGACCT---  
---GTCTGA---ATCCAGCTGGATAGAA---ACCCGTCCTCAATTAAGT  
CGATCGATTGAGCGATTCTGGGATTTTTG---AGCAAGCCAAGCGGAGG  
AGGATTTGCGCCATCTGCCACGCCG-----GTTTCAGAGACATCGTC  
TCCATTTAAAATCTGAA-----NNNNNNNNGTTACAGACAGAGAAGTGGCTTTGG  
GTATCAATCCGTTGCGCCGACGGCATGGGCGCTTTTAAAATCAACCACAGC  
TCCCACGATCTTGCTCTGG---GCAAACAGCGTTTCCTCGCAAGCG--  
-CCCGGCTACGCCGCCCGCTGCCCTGGGA---CACCATCA-----TC  
ACCCCACTCATGTGAGCTCG---TACTCCACCGCCGCTTCAACTCCACT  
CGGGACTTTCTGTTTCGCAATCGGGGCTTCGGAGACGCCACGAG-----  
-----CGCGCAGCACAGCCTCTTCGCCTCCGC---CGCTGGAAGTTT--  
-C-----GCCGGCCACATGGACACTCTGACGCCGCTGGGCACCTGCTC  
TTCCCGGACTGCACGAG---CAAGCGGCCACGCACGCGTCCTCCAACGT  
GGTGAACAGTCAGATGCGCCTGGGCTTTTCCGGGGACATGTACGGCAGGG  
CCGAGCAATACGGTCACGTCGCGAGTCCGAGGT---CCGAGCACTACGCC  
TCGACTCAGTTGCACGGCTACGGCCCCATGAACATGAACATGGCTGCT--  
-CATCACGGGGCAGGGGCTTCTTTTCGGTACATGCGACAGCCCATAAAGC  
AAGAGCTCATCTGCAAATGGGTGGAACCCGAGCAGTTGACGAATCCGAAA  
AAGTCTGCAACAAAACTTTCAGCACCATGCACGAGCTTGTGACCCACCT  
GACGGTGGAGCACGTTGGGGGACCGGAGCAGTCGAATCACATTTGCTTTT  
GGGAAGAGTGTTCCCGGGAAGGGAAACCGTTTAAAGCAAAGTATAAACTC

GTGAATCATATCCGAGTGCACACCCGGAGAGAAACCGTTTCCGTGTCCGTT  
CCCCGGCTGTGGAAAA

>*Oryzias latipes*

AGCCTGCTAATTCGGGCTGAATTAAGTCAGCCCCGGTCTCTATTAGGTGA  
CGACCAAATCTATAATGTAATTGTAACCGCGCATGCCTTCGTAATAATTT  
TCTTTATAGTAATACCAATCATGATTGGGGGCTTTGGCAACTGATTAATT  
CCTCTAATGATCGGGGCCCTGATATGGCCTTTCTCGAATAAAACAACAT  
GAGCTTCTGACTACTTCCCCCTCCTTCCTTCTATTGTTAGCTTCTCTG  
GCGTGGAGGCCGGTGGGGGACAGGATGGACCGGTACCCGCCTCTATCA  
GGCAACCTAGCGCATGCGGGAGCATCCGTGGATTTAACCATCTTTTCCCT  
CCATCTGGCAGGTATCTCCTCTATCTTAGGGGCTATTAATTTTATTACAA  
CAATTATTAATAAAAACCCCGGCCATCTCTCAGTATCAGACCCCTTTA  
TTCGTGTGAGCTGTACTAATTACCGCAGTATTACTTCTACTCTCCCTCCC  
TGTGCTCGCTGCAGGTATCACTATGCTCCTAACGGACCGAAACCTAAATA  
CAACATTCCTTTGACCCTGCAGGGGGAGGGGACCCTATTCTCTACCAGCAC  
CTGTTCTGATTTTTTGGTCACCCCGAAGTTTATATTTTAATTCTCCCCGG  
CTTCGGAATAATTTACATATTGTGGCCTATTATTCGGGTAAAAAGAAC  
CTTTTCGGGTACATGGGTATGGTCTGAGCCATAATGGCAATTGGGCTTCTA  
GGGTTTATTGTATGAGCCACCACATATTCACCGTAGGGATAGATGTGGA  
TACTCGGG---TTCTTGAGAGAAACCTTCATCCATCCAACCTGCCTTGG  
CATGCTGCTGCTGTCTGACGCCACCAGTGCACCAAGCTGTCAGAGCTCT  
CCTGGGGCATGTGTCTTAGCAACTTCCCTGCTATTTGCAAGACAGAGGAT  
TTCTCCAACCTGCCAAAGACATGGTGGTGCAGCTGTTGTCCCATGAGGA  
ACTAGAGACAGAAGATGAGAGACTGGTTTATGAAGCTGCCCTCAACTGGA  
TCAACTACGATCTGGAGAGGAGGCACCTGCCATCTTCCAGAACTCCTCAGA  
ACAGTCCGCCTTGCTCTGCTTCCCTGCCATCTTTTTAATGGAGAATGTGTC  
AACAGAGGAGCTGATCAACGCTCAGGCAAAGAGTAAGGAACCTGGTAGATG  
AGGCTATACGCTGTAAGCTTAAGATCCTGCAGAATGACGGCGTTGTCAAC  
AGCCCATGTGCTCGACCAAGAAAAACCAGCCATGCCCTCTTCTTCTGGG  
TGGGCAGACCTTCATGTGTGACAAGTTGTACTTGGTTGATCAGAAAGCCA  
AAGAGATCATTCCCAAAGCTGACATTCCCAGTCCTAGGAAAGAATTGAGT  
GCATGTGCCATTGGTTGTAAAGTCTACATTACAGGTGGAA--GGGATC-  
AGAGAACGGAGTGTCCAAGATGTCTGGGTCTATGATACTGTCCACGAGG  
AATGGTCAAAGGCTGCCCCATGCTAATCGCCCCGGTTGGGACATGGGTCC  
TCTGAGCTGAAACACTGTCTCTATGTCTGTTGGAGGACACACTGCAGCTAC  
TGTTGCTGGCCGGCTTCTCCATCTTGATCAATACGTCGTCATCTTTAGC  
CGTTCAACGACTAGGTTAATCCTGAATGAAGCTGAGGTGGTTCATGGCCAT  
AGTCCAGGAGTTACAGATGAGGGTGGTCCAGTTTCTCTAGAGGAACAAT  
CTTTTCCCAGCATCGTCCAGGTGATCAGCGGTGCCCTCCATGCTTGTGAGT  
ATGCATGGAGCTCAGCTCATTACCTCACTGTTTCCCTCCCAGAGGTGCTGT  
TGTTGTTGAATTGTTCCATTTGCTGTCAACCCTGAGCATTACACCCCAT  
ATAAAACCCTGGCGTCCCTTCCCGGCATGGACCTTCACTACATTTCCCTGG  
AGGAATACTAAAGAAGAAAACACTGTCACCTATCCAGAAAGACCCCTGGGA  
GCAAGGAGGAATAGTTCACCTGGAAAAAGAGGATCAGAGGCGAATTTTGA  
AAAGCAAGGAAGTCCCGCGACACTTGTGCTGCCGGAACCCAGAGTGGCTC  
TTCCGCATCTACCAAGACACTTTGGTGGACATACTTCTTTTCATCGAGCT  
TCTCAA---AGAGGCTTCGAAG---ACCAAGCTAAGCCTGAGAAA---AG  
ACAAAGCGTCCAGTACGGTCCACCCCTGGTCCGCTCAGAGAAGCCAGTGT  
CAAACCTCAGTTCAAACGACCAAGGAAGCCAAGCTCTCCGTCTCTGGCA  
GATCCCATGGAATCTAAAATACCTGAAGGTTAGAGACGTGAAGTACGAAG  
TGTGGATCCAGAAAAAGATAGCAGCAAGGGTACATTGGAGGATCAAATC  
ATTCAGGCAAACCCCTGCACTTGAGGCCTTTGGGAATGCCAAAACGGCGAG  
AAATGACAACCTTCTCGTTTTGGTAAATTCATCCGTATTCATTTTGGCA

CAAGTGGCAAACCTGTCATCTGCCGACATTGAAACATACCTGCTGGAGAAG  
TCCCGTGTACCTTTTCAAGCTCAAGGCTGAAAGGAATTATCACATCTTCTA  
CCAGATCCTGTCCAATCAAAGCCAGAGCTGCTGGACCTGCTGCTCATAA  
CAAACAACCCATACGACTATTCTACATCTCCCAAGGAGAGGTAACGTGT  
GCCTCCATCAATGACTCGGAGGAGCTGATGGCCACTGACAGTGCCTTTGA  
TGTCTTGGCTTCACTCAAGAGGAGAAAATGGGTGTCTACAAGTTGACCG  
GTGCCATAATGCACTACGGCAACATGAAGTTCAAACAGAAGCAGCGGGAG  
GAGCAGGCTGAACCTGACGGCACAGAGGCTGCTGATAAATCAGCTTACCT  
AATGGGGCTGAACTCTGCAGACCTCATTAAGGACTCTGTCATCCCAGAG  
TTAAGGTTGAAATGAATACGTACCAAAGGCCAAGGTGTAGATCAAGTC  
TACTACCCCAACAAGGAGGCCTTCAAGTGTGACGAGTGCAGGAAAGCACTA  
CAACACCAAGCTGGGATACAAACGCCACGTGGCCATGCACTCTGCAACTG  
CGGGGGACCTGACCTGTAAAGTGTGCATGCAGAGCTACGAGAGCACCCCC  
GTTCTCCTGGAGCACCTCAAGAGCCACTCGGGGAAGTCCTCGGGTGGTGC  
CAAGGAGAAGAAGCATCCATGTGACCACTGTGACAGACGTTTTCTACACGC  
GGAAGGACGTGCGGCGTACATGGTGGTCCACACGGGCGGAAAGGACTTC  
CTGTGCCAGTACTGTGCCAACGCTTCGGCAGGAAGGACCATCTGACGCG  
CCACGTGAAGAAGAGCCACTCTCAGGAGCTGCTGAAGATTCAAAACAGAAC  
CTCCGGATATGCTGGGCCTCCTGGCGTCGGGGTCTCCGCCGTGCTCTGTG  
AAGGAGGAGCTCAGTCCCATGATGTGTGGCATGGCGCCCAACAAAGACCC  
CATGATGGGCAAGTCGTTCCCGAGCGGGGCATCTTTTCCGATGAGCATGT  
ACAACCCCCACCAT-----TTGCAGGCCATGTCTAAACCCGGGGTGGGT  
CATCCA-----CACCCGTCCCTGATGCCCAACTCCTTGTCTGCAGCTAT  
GGGCATGGGCTGTTCCATGGAGTATCTCATCTATGCCTCTTTCTCCTTCA  
TGGGATGTTTACAAATCAGTGTGATCGAACATTTGTGAACCTGCTGGCT  
AGTAACTACCAAGCGTTTTCTACGCTTTAACCACAGAAATACTTCAG  
TAACTATAGTCTGTATTATTGGATTCTACATTTACGAACCCATAGAGTACT  
GGAACTCCACTGTGCAGGAGCACCTAAAGACTTTGAGCCATGGATTCAAC  
AAGATCTCTTGGATGGACAACCTTTTTCCACTACCTTCGGGTGGTGAACGT  
GAGCGCATCAACCAAGGGCGACTTTATCTCCATCCTGAAGGGCTCTTTCT  
TGCGCAGCCCGGAGTACCAGCATTTACGGAGGACATAATATTCTCTAGG  
A---ACCGCAGACTA-----ACGAATACGACATTTATGCCTCACGAAT  
GTACTTGGTAGCACGACGACTGAAAAGAAGCGAGAGGAGGTGGTGGAGC  
TTTTGGAGAAGCTCCGCCATTGATGCTAATCAACAGCATCAAGTTCATT  
GCCTTCAACCCACATTTGTTTTTATGGACCGCTACAGCTCATCCGTCAT  
CTCCCTATCTTGACCTCAGGCTTCAGTGTACTTACCATTCTAATACTCA  
CATCTTCCCTGGTTATCAATCCCTTGGAAATTTCTGGCTCATTCTCACT  
GTTACTTCTGTTGAGCTGGGTGTCTTGGGATTGATGGGCTTTACCTTTT  
TGAATGGCAGCCAGCCCTCAAAAATGTGTCTACATCTTGCAATGTTGGCA  
TTATTAATGGACTCTCCGGGTGGACGTCATCTGTTGATGATATCCCGGCT  
GAGACCATCACTCGGCGCTTTTCGCTATGATGTGGCACTGGTGGCAGCATT  
GAAGGATCTGGAGGAGGACATCATGGATGGGCTGAGAGAGAGTGGGATGG  
AAGACAGCACTTGACCTCAGGCTCAGCGTTTTGATCAAAGAATGCTGT  
GATGGCATGGGTGATGTCAGTGAGAAACACGGTGGGGGACCAGCTGTTCC  
TGAGAAAGCTGTCCGCTTCTCTTTTACCATCATGCTATATCTGTCCAAG  
TAGAAGACGGAGAC-----AAAGAA  
GTTACCATTTTACAGAGCCAAAGCCAAACTCAGAGCTGTCCTGCAAGCC  
CCTTTGCTTAATGTTTGTGGATGAGTCAGACCACGAGACTCTCACAGCCA  
TCCTGGGGCCGATAGTGGCAGAGAGAGATTCAATGAAACACAGCAGGCTC  
ATATTGTCCATTGGAGGCCTGCAACGCTCCTTTTCGCTTCCACTTTAGGGG  
CACGGGTTACGATGAGAAAATGGTGCCTGAAATGGAGGGCCTGGAGGCCT  
CGGGGTCAACTTATGTTTGCACACTGTGTGACTCCAGCCGAGCAGAGGCT  
GCTCAGAACATGGTCTTACACTCCGTCACCCGCAGTCACGACGAGAATCT

TGAACGCTATGAAATATGGAGAACNAACCCCTATTCTGATTCTGTGGATGA  
GCTGCGGGACAGAGTCAAAGGCGTGTCTGCCAAGCCGTTCTTGGAGACGC  
AGCCCACGCTGGACGCATTACACTGCGACATCGGCAATGCCACAGAATTT  
TACAAAATCTTCCAGGATGAAATCGGAGAAGTGTACAAAAGGT---CAA  
C---CCCAGTCGGGAGGAACGGCGCAGTTGGAGAGCAGCCTTAGATAAAC  
AGCTGAGGAAAAACATGAAGCTCAAGCCAATAATGAGGATGAATGGAAAT  
TACGCCCGCAAGCTAATGACCATGGAGGCTGTGGAGGTGGTGTGTGAGCT  
GGTGCCATCCGAGGAGAGGAGAGAGGCTCTTAGGGAGCTGATGAAGCTCT  
ACCTTCAGATGAAGCCAGTGTGGCGGGCCACATGCCCAGCCAAGGAGTGC  
CCTGACCAGCTGTGTGCTACAGTTTCAACTCCCAGCGTTTTGCTGACCT  
CCTCTCCTTACCTTTAAATACAGGTACAATGGAAAAGATAACAAAATTACC  
TGCACAAGACCCTGGCTCATGTGCTGAAATCATAGAGAGAGATGGATCC  
ATAGGGGCTGGGCCAGTGAGGGAAAACGAGTCAGCAAACAAATCTTACAC  
TATTGAAATGGGTCCTTTGGGACCCAAGTGGAAGGAAAACCCCAACCCTT  
TCATCTGCTCAATTGAAGATCCCACCAAACAGACAAAGTTCAAGGGCATC  
AAGACCTACATATCATACAGGGTCACACCAAGTCACACCGGGCGTCCCGT  
CTACCGGGCGCTACAAGCACTTCGACTGGTTGTACAACCGACTGCTAAACA  
AGTTCACTGTGATCTCAGTCCCTCATTTGCCTGAGAAGCAAGCAACGGGG  
CGCTTTGAAGAGGACTTCATCGAGAAGCGCAAGAGGCGCCTGATACTGTG  
GATGAACCACATGACCAGTCACCCGTTCTCTCCCAGTACGAAGGCTTTG  
AGCACTTCCTCATGTGTGCCGACGATAAACAGTGGAACCTGGGCAAGAGG  
CGGGCTGAGAAGGATGAAATGGTGGGCGCCATTTTCATGCTGACTTTCA  
GATCCCAATGAGCACCAGGACCTTCAGGATGTGGAGGAGCGGGTTGACA  
ACTTTAAGACCTTCGCCAAAAAAATGGATGACAGCGTGATGCAGCTCACA  
AATGTGGCCTCCGAGCTGGTGAGAAAACATCTGGGTGGATTCCGGAAGGA  
GTTCCAGCGACTGGGGAACGCCTTTCAGTCCATCAGCCAGGCGTTTATGC  
TGGACCCCCCATCGCTCGGACGGCCTCAACAATGCCATCTCCCACCCT  
CTCGCCACGTTCCCTCAAACCTGACCTCTCTGGGTTTCATCATCGGCGTCGG  
CGTGGTAGGAAACCTACTGATCTCCATCCTGCTGGTCAAAGACAAGAGCT  
TGCACCGAGCGCCCTACTATTTCTGCTGGACCTGTGCGCCTCCGACATC  
CTGCGCTCGGCTATCTGCTTCCCGTTCGTCTTTACCTCGGTGAAAAATGG  
ATCGGCGTGGACGTACGGCACGCTGACCTGCAAGGTGATCGCTTTTCTGG  
GCGTGTCTCCTGTTTCCACACCGCCTTCATGCTGTTCTGCGTCAGCGTC  
ACCCGCTACCTGGCCATCGCGCATCACCGCTTCTACACAAAAGGCTCAC  
CTTCTGGACGTGCTTGGCTGTGATCTGCATGGTGTGGACGCTGTGCGTGG  
CGATGGCATTCCC GCCGGTCTTGGACGTGGGGACGTA CTCTTCATCCGG  
GAGGAGGACCAGTGCACGTTTTCAGCACCGCTCCTTCCGGGCCAACGATTC  
TTTGGGCTTCATGCTCTTGGCTGGCGCTCATCCTCCTAGCCACACAGCTGG  
TTTACCTCAAACCTCATCTTCTTCGTCCACGACCGGCGAAAGATGAAGCCC  
GTCCAGTTTGTGCCCGCCGTGAGCCAGAACTGGACCTTCCACGGTCCGGG  
CGCTAGTGGGCAGGCAGCGGCCAACTGGCTGGCTGGATTCCGGTCGGGGCC  
CTACCCCGCCAACCTTGCTGGGCATTCGGCAGAACAGCAACGCAGCGGGC  
CGCCGGCGTCTACTCGTACTGGATGAGTTCAAACAGAGAAGAGGATTAG  
TAGGATGTTCTACATCATGACCTTTTTTTTTCTTGGCGCTTTGGGGGCCCT  
ACTTGGTGGCCTGCTACTGGCGGGTGTGTTGCCAGGGGGCCCGTGGTTCCC  
GGGGGTTACCTAACAGCAGCCGTGTGGATGAGCTTTGCCCAGGCGGGGGT  
CAACCTTTTCATCTGCATCTTCTCCAATAGGGAGGCCAAATCTCGCTTTC  
ACCCTGGCGTGGGGACTGCTCCTGGCACGGAGC---GCAACGTTCCACTC  
GGCAACAGCTTGTGTCTCCTCAGCAAGCCGAGGAGCCCACTGTTGCCAC  
CCCCCGCAGCGATGGTTTGTACCC---CTGCCAACACCGACTGGACT  
TTGCAGCCTCGGCATACGACGCCGCT-----GATTTCCGGGTAAC  
GCGGCCACCTTGTGTCTCCTCAGCAAGCCGAGGAGCCCACTGTTGCCAC  
CCCCCTGCCGACTGCGAGCTGCTCCAACCGGCCCTCTTGGCTATTACGCAG

ACCCGTCTG---GCTGG---GGAGGACGCACGCCGCCGCACTACTGCGGC  
GTCAACAGCAAAGCCAGCTCGGTCTTTTCCTGCTGGCCCCGGAACACCAT  
CGGGGGCCGCTCAGGCA---CC---AGCTACCTGC-----AGGAGG  
A---GGGG---GACTC---CATCAGCACGGAGAGGTCACCG---AT---C  
GGTGGCGCGGAGGAG---AGCAAAGCCAAAGACATCAC---ATCTGA---  
GTCTAGCTGGATAGAG---ACGCCCTCCTCCATCAAATCCATCGATTCCA  
GCGATTCTGGGATCTTTG---AACAGGCCAAACGGAGGAGAATCTCCCC  
ACTGCCACGCCG-----GTTTCAGAGACTGTGTCCCCGTTAAAGTC  
TGAGCATCACTCAACAGGCGAAGTCACGGAGAGAGAAGTGGCGCTGGGGA  
TAAACCCATTTCGCGGATGGGATGGGCGCCTTCAAAAATAAACACAGCTCC  
CACGACATCGGCTCCGG---ACAGACTGCGTTTTCTCCAGGCG---CC  
CGGCTAC---GCGGCAGCCGCTTTGGGA---CACCATCA-----CCATC  
CGACCCACGTTGGCTCT---TACTCCACGGCGGCTTTCAACTCCACCAGG  
GACTTTCTTTTTAGAAAATCGGGGTTTCGGGGATGCCACCG-----  
---AGCGCAGCACAGCCTGTTTGCCTC-----CGGAAGTTT---C-  
-----GCAGGGCCACATGGACACTCCGATGCAGCGGGGCACCTGCTCTTC  
CCCCGGCTGCACGAG---CAAGCGGCGAGCCACGCGTCTTCCAACGTGGT  
CAACAGCCAGATGCGGCTGGGCTTCTCGGGGGACATGTACGGGCGGGCTG  
ATCAGTACGGCCACGTTACGAGCCGAGAT---CCGACCACTATGCTTCG  
ACTCAGCTGCACGGCTACGGCCCCATGAACATGAATATGGCCGCA---CA  
CCACGGAGCAGGGCCCTTCTTCCGATACATGAGGCAGCCGATCAAACAAG  
AGCTCATCTGTAAGTGGATCGAACCGGAGCAGCTGACAAACCCCAAAAAG  
TCTTGCAACAAAACCTTTCAGCACGATGCACGAGCTCGTCACCCATCTGAC  
CGTGGAACATGTGGGGGGACCGGAGCAGACGAACCACGTTTGCTACTGGG  
AGGACTGCTCCAGAGAAGGGAAGCCGTTCAAAGCCAAATACAAACTTGTA  
AATCACATCCGAGTACACACCGGAGAAAAGCCCTTCCGTGTCCGTTC  
CGGCTGTGGCAA

>Osmerus mordax

AGCCTCCTTATCCGAGCCGAGCTAAGCCAACCTGGTGCCCTCCTGGGGGA  
CGACCAGATTTATAATGTTATCGTCACTGCGCACGCTTTTGTATAATCT  
TTTTTATAGTAATACCAATCATGATTGGAGGTTTCGGTAACTGGCTCATC  
CCCCTTATGATTGGGGCCCCAGACATGGCCTTCCCCGTATAAACAACAT  
AAGTTCTGACTTTTACCTCCCTCCTTTCTACTCCTTAGCTTCTTCTG  
GAGTTGAAGCAGGGGCTGGGACCGGCTGAACAGTCTATCCCCACTTGCT  
GGTAATCTAGCCCATGCTGGAGCTTCGGTAGATCTAACAATTTTTTCTCT  
TCACCTTGCGGGAATCTCCTCTATCTAGGGGCAATCAATTTTATTACAA  
CTATTATTAATATGAAGCCTCCAGCCATCTCCCAGTACCAGACCCCTTA  
TTCGTCTGAGCCGTTCTGATCACGGCCGTCCTTCTCTCCTTTCCCTCCC  
AGTACTAGCTGCTGGGATTACCATGCTTCTGACAGACCGAAACCTGAACA  
CTACTTTCNNNNNNNNNNNNNNNNNNNNNNNNNNNNNNNNNNNNNNNNNNNN  
NNNNNNNNNNNNNNNNNNNNNNNNNNNNNNNNNNNNNNNNNNNNNNNNNNNN  
NNNNNNNNNNNNNNNNNNNNNNNNNNNNNNNNNNNNNNNNNNNNNNNNNNNN  
NNNNNNNNNNNNNNNNNNNNNNNNNNNNNNNNNNNNNNNNNNNNNNNNNNNN  
NNNNNNNNNNNNNNNNNNNNNNNNNNNNNNNNNNNNNNNNNNNNNNNNNNNTTCTGGAGAGGAACCTG  
CACCCGTCCAACCTGCCTGGGCATG  
CTGCTGCTCTCCGACGCCACCAGTGCACCAAGCTGTCCGAGCTGTCCTG  
GGGCATGTGCCTGAGCAACTTCCCAGGCAATTTGTAAGACGGAGGACTTCC  
TCCAGCTCCCAAGGACATGGTGGTCCAGCTGCTGTCCCACGAGGAGCTG  
GAGACGGAGGACGAGAGGCTGGTGTACGAGGCGGCCCTCAACTGGGTGAA  
CTACGACCTGGAGAGGCGCCACTGCGGCCTGCCGAGCTGCTGCGCACGG  
TCCGCTGGCGCTGCTGCCCGCCATCTTCTCATGGAGAACGCTCCACG  
GAGGAGCTGATCAACGCCAGGTGAAGAGCAAGGAGCTGGTGGACGAGGC  
CATCCGCTGCAAGCTGAAGATCCTGCAGAACGACGGCGTGGTCAACAGCC  
CCTGCGCCCCGCCCGCAAGACGAGCCACGCCCTCTTCTGTTGGGCGGA

CAGACCTTCATGTGCGACAAGCTCTACCTGGTGGACCAGAAGGCCAAGGA  
GATCATCCCCAAGGCGGACATCCCCAGCCCCAGGAAGGAGTTCAGTGCCT  
GTGCCATCGGCTGCAAGGTCTACGTCACGGGGGGGC--GGGGCTC-GGAG  
AACGGCGTGTCCAAAGATGTGTGGGTGTACGACACCGTGCAGGAGGAGTG  
GTCCAAGGCGGCACCGATGCTCATCGCCCGGTTTGGCCACGGCTCAGCCG  
AGCTGAAACACTGCCCTCTACGTGGTGGGAGGGCATAACCGCCGCCACGGGC  
TGCTTGCCGGCCTCGCCCTCCGGACCAGTACATTGTGGTGTTCAGTCGTT  
CCCAAACCAGGCTGATCCTCAACGAGGCCGAGCTGATCCTGGCGTTGGCG  
CAGGAGTTCAGATGAGGGTGGTGACGGTCTCCATGGAGGACCAGACCTA  
CTCCAGCATCGTGCAGTTGATCAGCGGAGCCTCCATGCTCGTCAGCATGC  
ACGGAGCTCAGCTCGTCACCTCGCTCTTCCCTCCCCAGAGGGGGCGGCTGTG  
GTTGAGCTCTTCCCCACGCGGTGACGGTCTCCATGGAGGACCAGACCTA  
GACCTTGGCCACCTTGCCAGGCATGGACCTCCAGTATGTCGCCTGGAGGA  
ACACCATGGAGGAGAACTCCGTGGCCACCCAGATAGACCCTGGGATCAG  
GGGGGCATCGCTCACCTGGACAAGGATGAGCAGGAGCGCATCCTGGCCAG  
CAGAGAGGTGCCCAGACACCTTTGCTGCCGAAACCCCGAGTGGCTGTTCC  
GCATCTACCAGGACACCAGGTTGGACATCCCCTCTCTGCTGGACGTCCTC  
AG---GGAGAGCCTGAAG---ACCAGGCCCAACCTCAAGAA---GACCCG  
GCCTGCCAGCACTGTTTCATCCAGGCAGGGTGGAGGGAGCCTCAGTGCCAGA  
CCTCAGTCCAGGCTACCAACGAAGCCAAGCTCACAGTATCCTGGCAGATC  
CCTTGGAACCTCAAGTACTTGAAGGTNNNNNNNNNNNNNNNNNNNNNNNNNNNNNNNNNAAGAGAGATCCCA  
GCAAGGGAACC

TTGGAGGATCAAATCATCCAGGCTAACCCCTGCCTTGGAGGCTTTTGGTAA  
TGCCAAAACCTTTGAGRAATGACAACCTCGTCACGCTTCGAAAATTCATCC  
GGATTCACCTTCGGAACCAGTGGCAAGCTGTCCTCAGCTGACATAGAGACT  
TATCTTCTGAAAAGTCACGTGTCACCTTCCAACCTCAAGTCAGAAAGGAA  
TTACCATATCTTCTTTCAGATCTTGTCCAATAAAAAGCCAGAGCTGTTGG  
ACATGCTTCTGATTACCAACAACCCATATGACTACTCGTACATCTCCAA  
GGAGAGGTAACAGTAGCATCTATCAATGATGCTGATGAATTGATGGCCAC  
TGACAGTGCCTTTGATATCCTTGGCTTTACTCAAGAGGAGAAAATGGGGG  
TCTACAAGTTGACAGGAGCTATCATGCATTATGGCAACATGAAGTTCAAG  
CAAAAGCAGCGTGAGGAGCAGGCAGAGCCTGACGGCACTGAGGCGGCTGA  
CAAGTCAGCTTACCTAATGGGGCTGAACTCTGCAGATCTTGTGAAAGGAC  
TCTGCCATCCCAGGGTAAAGGTTGGCAATGAGTATGTCACCAAAGGGCAG  
GGTGTAGATCAAGTCTACTATCCAAACAAGAGGCCTTCCGCTGCCAGGA  
CTGTGGGAAGCACTACAACACCAAGCTGGGCTACAAACGCCATGTAGCCA  
TGCACTCGGCCACAGCAGGGGACCTCACCTGCAAGGTGTGCCTGCAGAGC  
TACGAGAGCACGCCGGCGCTGCTGGAGCACCTGAAGAGCCATTTCGGGGAA  
GTCGTCCGGCGGGCCCAAGGAGAAGAAGCACCCCTGCGACCACTGCGACC  
GCCGCTTCTACACGCGCAAGGACGTCCGCCGCCACATGGTGGTGCACACG  
GGCCGCAAGGACTTCTGTGCCAGTACTGCGCCAGCGCTTTGGCAGGAA  
GGACCACCTCACGAGACACGTGAAGAAGAGCCACTCCAGGAGCTGCTGA  
AGATCAAGACGGAGCCGCCAGACCTGCTGGGGCTGCTGGGGTCTGGACC-  
-----CATCAAGGAGGAGCTCAGCCCCATGATGTGCAGCATGAG  
CTCCACCAAGGACCCCTCATGGCCAAGCCCTTCCCCGGTGGGACGGCCT  
TCCCCATGGGCATGTACAACCCCCACCAC-----CTCCAGCCCTGCCC  
AGCCCTGGAGGGGGGCAC-----CACCCCTCCCTGATGCCAGCTC  
CCTGTCTGCCGCTATGGGCATGGGCTGCCACATGGAC-----  
-----  
-----  
-----  
-----  
-----  
-----



-----  
-----  
-----  
-----  
-----  
-----  
-----  
-----  
-----  
-----  
-----  
-----  
-----  
-----  
-----  
-----

-----GC  
TTTGGTGTCTGCCCTGAAGGACCTGGAGGAGGACATCGTGGAGGGCTTGA  
GGGAGCACGGCCTGGAAGACAGTTCTGCACCTCCGGCTTACCGTGACC  
ATCAAGGAGTCTGTGATGGCATGGGGGACGTCAGTGAGAAGCACGGAGG  
GGGGCCGGCCATTCTGAAAAGGCCGTCCGCTTCTCCTTACCGTCATGT  
CCGTGTCCGTCTGGCCGAGGGGAGGAG-----  
-----GAAGCGGTCACCGTCTTTCAGAGAGCAGAAGCCCAACTCGGA  
GATGTCCTGYAAACCTCTCTGCCTGATGTTTGTGGACGAGTCGGACCACG  
AGACCTTGACGGCCATCTTGGGGCCTGTGGTGGCCGAGAGGAACGCCATG  
AAGAACAGCCGCTCATCCTGGCCATGGGCGGCCCTCCCTCGCTCCTTCCG  
CTTCCACTTCAGGGGCACGGGCTATGATGAGAAGATGGTGCCTGAGATGG  
AGGGCCTGGAGGCCTCAGGCTCCACCTACGTCTGCACCCTCTGCGACGCC  
ACCAGAGCTGAGGCCCTCCAAAACATGGTGTCTCCACTCAGTCACCCGCAG  
CCACGACGAGAACCTGGACCCTACGAGATGTGGAGGAGAAACCCCTACT  
CTGAATCGGCGGACGAGCTGCGAGACCGGGTGAAGGGGTCTCCGCCAAG  
CCCTTCATGGAGACCCAGCCACATTTGGACGCGCTGCACTGTGACATCGG  
CAACGCCACCGAGTTCTACAAGATCTTCCAGGACGAGATCGGGGAGGTGC  
ATTGCAGGCC---CAAC---CCGAGCAGGGAGGAGCGTCGGAGCTGGAGG  
GCGGCTCTGGACAAGCAGCTCAGGAAGAAGATGAAGCTGAAGCCCGTGAT  
GAGGATGAACGGAAACTTTGCCCGGCGACTGATGACGGCGGAGGCGGTGG  
AGGTGGTGTGCGAGCTGGTGCCTGCGCAGCAGCGGAGCGAAGCCCTCAGG  
GAGCTGATGAACCTTACCTCCAGATGAAGCCCGTCTGGCGCGCCACGTG  
CCCAGCCAAAGAGTGCCCCGACCAGCTGTGTGCTACAGCTTCAACTCCC  
AGCGCTTTGCTGATCTCCTCTCTTCCACCTTCAAGTACAGGTACGACGGG  
AAGATCACCAACTACCTCCACAAGACTCTGGCCACGTTCTTCAAATCAT  
AGAGAGAGATGGCTCCATCGGGCCTGGGCCAGTGAGGGGAACGAGTCGG  
GAAACAAATCATAACCATTGAGATGGGCCAAAAGGGCCCCAGTGAAAA  
GAGAGCCCTCAGCCTTCTCCTGTCTGTGGAGGACCCTACCAAACAGAC  
CAAGTTCAAAGGCATCAAGACCTATATATCTTACCGGGTCACCCCAGCC  
ATACAGGGCGACCTGTCTACCGCCGGTACAAGCACTTCGATTGGCTATAC  
AACCGTCTGCTGCATAAGTTACCGTCATCTCTGTGCCTCACCTGCCGGA  
AAAACAGGCCACAGGACGTTTTGAGGAGGACTTCATCGAGAAGCGCAAAA  
GACGGTTGGTCATCTGGATGGACCACATGACCAGTCATCCTATCCTTTCA  
CAGTACGAGGGCTTGGAACACTTCTCATGTGTGCTGATGACAAGCAGTG  
GAAGCTGGGAAAGCGGCGGGCGGAGAAAGATGAGATGGTGGGTGCCACT  
TCATGCTGACCTTTCAGATACCCAACGAGCACCAGGACCTGCAGGATGTG  
GAGGAGCGAGTGGACACCTTCAAGTCCTTTGCTAGGAAGATGGATGAAAG  
CGTCATGCAGCTGACCCACGTGCGCTCAGAACTGGTTGAAAACACCTTG  
GTGGCTTTCAGGAAAGAGTTTCAGCGCCTGGGAAATGCGTTCCAGTCCATC  
AGCCAGGCGTTCTGCTTACCCCTCCTCAGACTCGGATGCCCTCAACAA  
TGCCATTTCTCACNNNNNNNNNNNNNNNNNNNNNNCTGACCTCCTTGGGTTTCATCATCGGCGTTGGAGTG

G

TCGGCAATCTTCTGATCTCCATCCTACTGGTCAAAGACAAGAGCCTGCAC  
CGAGCGCCCTACTACTTCTTGCTGGACCTGTGCGCCTCCGACATCCTGCG  
TTCCGCCATCTGCTTCCCCTTCGTGTTACCTCCGTCAAGAATGGTTCCG  
CCTGGACGTACGGAACCCTAACCTGNNNGNNGATCGCCTTCTGGGGTCTGTC  
CTGCTTTCACACGGCCTTCATGTTGTTCTGCGTCAGCGTGACCCGCTACC  
TGGCCATCGCCACCATCGCTTCTACACCAAGAGGCTGACCTTCTGGACG  
TGCTTGGCCGTATCTGCATGGTGTGGACGCTGTCAGTGGCCATGGCCTT  
TCCCCAGTACTGGATGTAGGGACGTACTCCTTCATCAGAGAGGAAGACC  
AGTGCACCTTCCAGCACCGCTCCTTCAGAGCCAACGACTCCCTGGGCTTC  
ATGCTGCTGCTCGCCCTCATCCTGCTGGCCACGCAGCTGGTCTACCTCAA  
GCTCNTCTTTTTTCGTCCACGACCGCCGGAAGATGAAGCCGGTCCAGTTCGT  
GCCGGCGGTGAGCCAGAAGTGGACCTTCCACGGGCGGGGGCCAGCGGCC  
AGGCGGCGGCTAACTGGCTGGCGGGCTTCGGGAGAGGCCCCACCCCGCCC  
ATCCTTCTGGGCATCAGGCAGAACAGCAACGCGGCGGGCCGAGGCGACT  
CCTGGTGTGGACGAGTTCAGACGGAGAAGAGGATCAGCCGGATGTTTT  
ACATCATGACCTTCTTCTTCTGCTGGCCTGTGGGGGCCCTATCTGGTGGCC  
TGCTATTTGGANAGTGTTCNNNNNNNNNNNNNNNNNNNNNNNNNNNNNNNN  
NNNNNNNNNNNNNNNNNNNNNNNNNNNNNNNNNNNNNNNNNNNNNNNNNN  
CCCTGGCGTAGGGACT  
GGTGTGGCACGGACC---GCAGCGTCCCCTTAGTAACAGCTTGCTATC  
CCCGCAACAAACCGAAGAGCCCACAGTTG---CTTCCCACAGCGTTGGT  
TTGTCACCC---CTGCCAACAACCGACTGGACTTTGCCGCCTCGGCATAC  
GATGCTGCCGCTGCTGCAGATTTTTCGGGCAACGCGGCCACCTTGCTGTC  
CTACGCAGCGGCTGGAGTGAAGGCGC-----TTCCCCTCTCCACGGCAG  
GTTGCTCCAACAGACCGCTCGGGTATTACGCCGACCCGTCAG---GCTGG  
---GGTGCCCGTACGCCACCACAGTACTGT-----AGCAAGTCGAG  
CTCCGTTCTCTCATGCTGGCCCACGAATACTGTTACCGGCAGAACGGGCC  
---CGTCCAGTTACCTGG-----CCGAGGA---GGGA---GACGC-  
--AATCCCACAGAGAGGTCTCCA---AT---AGGGGCGTCAGACGAG--  
-GCAAAACCAAAAGACTT-----GTCCGA---ATCCAGCTGGATAGAA-  
--ACGCCGTCTTCAATAAAGTCAATTGATTCCAGTGATTCTGGAATCTTT  
G---AGCAAGCAAAACGGAGAAGAATTTCTCCGCTGCCACACCA-----  
----GTTTCGGAGACAGTGTCCCCGTAAAATCCGAA-----ACAG  
GCGAAGTACAGAAAGAGAAGTGGCTTTGGGGATAAATCCGTTTCGCAGAC  
GGGATGGGTGCTTTCAAATCAACCACAGTTCGCATGATCTTGGCTCCGG  
---GCAAACCTGCATTTTCTCCCAAGCG---CCCGGTAC---GCAGCCG  
CTGCACTGGGA---CATACCA-----CCACCCGACTCATGTCAGTTCT  
---TACTCTACGGCGGCTTCAATTCCACCCGGGATTTTCTCTTCAGAAA  
TCGAGGCTTCGGAGACGCTACCAG-----CGCTCAGCATAGTC  
TCTTCGCCTCCGC---AGCGGGAAGTTT---T-----GCAGCCCACAT  
GGACACTCAGATGCAGCGGGACACCTGCTCTTCCCAGGACTTCACGAA--  
-CAAGCCGCGAGCCATGCTTCTCAAATGTTGTTAATAGTCAGATGCGAT  
TGGGCTTTTCGGGGGACATGTACGGCAGGGCCGACCAGTATGGCCATGTT  
ACAAGCCCGCGGT---CCGACCACTATGCTTCGACCCAGTTGCATGGCTA  
TGGCCCTATGAACATGAATATGGCCGCG---CATCATGGAGCAGGGGCCCT  
TCTTCCGTTACATGAGGCAGCCGATAAAACAAGAGCTGATCTGCAAGTGG  
ATCGAACCAGAGCAACTAACGAACCCGAAAAAGTTCGTGCAACAAAACCTT  
TAGCACAATGCACGAGCTCGTCACCCATCTGACGGTGGAGCATGTGGGAG  
GACCGGAGCAGTCGAACCACATTTGCTTCTGGGAAGAGTGTGCCCGAGAA  
GGAAAACCATTCAAAAGCCAAATACAACTTGTGAACCACATCAGAGTGCA  
CACCGGAGAGAAACCATTTCCATGTCCATTTCCCGGTTGTGGCAAA

>Ostracoberyx dorygenys

-----

-----  
 -----  
 -----  
 -----  
 -----  
 -----  
 -----  
 -----  
 -----  
 -----  
 -----  
 -----  
 -----  
 -----  
 -----

-----NNNNNNNNNGAAACCTTCACCCATCTAACTGCCTTGGCATGCTGTTG  
 CTGTCTGACGCCACCCAGTGCACCAAGCTGTGAGAGCTCTCCTGGGGCAT  
 GTGCCTCAGCAACTTTCCTGCTATTTGCAAGACAGAGGACTTCCCTCCAAC  
 TGCCCAAAGATATGGTGGTGCAGCTTTTGTACATGAGGAGCTAGAGACA  
 GAAGATGAGAGACTGGTTTTACGAAGCTGCCCTTAACTGGATCAACTATGA  
 CCTGGAAGAGGGCACTGCAACCTTCCAGAGCTCCTGAGAACGGTCCGT  
 TGGCCCTGCTGCCTGCAATCTTTCTCATGGAGAACGTTTCTACAGAAGAG  
 CTGATCAACGCCCAGGCCAAAAGCAAGGAGCTGGTGGATGAAGCTATCCG  
 CTGTAAGCTGAAGATCCTGCAGAATGATGGCGTCGTTAACAGCCCATGTG  
 CTCGACCAAGAAAAACCAGCCATGCCCTCTTTCTTCTGGGAGGGCAGACT  
 TTCATGTGTGACAAGTTGTACCTGGTGGACCAGAAAAGCCAAAGAGATCAT  
 CCCCAAAGCTGACATTTCCAGCCCCAGGAAGGAGTTCAGCGCCTGCGCCA  
 TCGGCTGTAAGGTGTACATCACTGGTGGGA--GAGGCTC-AGAGAAATGGT  
 GTGTCCAAGATGTGTGGGTCTACGACACCATCCACGAGGAATGGTCGAA  
 GCGGGCACCCATGCTCATTGCCAGGTTTGGCCATGGCTCTGCGGAGCTGA  
 AACACTGCCTCTACGTGGTAGGAGNNNNNNNNNNNNNNNNNNNNNNNNNNNNNNNNNNNNNNNGGATG  
 AATACATTGTTGTGTTTCAGTC  
 GTTCAACAACGAGGCTGATACTGAATGAAGCGGAGCTAATCATGGTGCTG  
 GCCCAGGAGTTCAGATGAGAGTGGTTCACGGTATCCCTGGAGGAACAGTC  
 TTTCCCAGTATCGTCCAGGTGATCAGCGGTGCTTCCATGTTAGTCAGTA  
 TGCATGGAGCTCAGCTTATCACCTCACTCTTCCCTCCCAGAGGAGCTGCT  
 GTGGTGGAGCTGTTCCCTTTGCTGTGAACCCAGAGCAGTACACCCGTA  
 TAAAACCTTTGCCTCCCTTCCAGGCATGGACCTTCACTATGTCTCTGGA  
 GGAACACTAAGGAGGAGAACACCATCACCCACCCAGACAGACCCTGGGAA  
 CAAGGGGGCATTGCTCACTTGGAGAAGGAGGAGCAAGAGCGAATATGGC  
 GAGCAAAGATGTTCCAGGCACCTGTGCTGCCGCAACCCAGAGTGGCTCT  
 TCCGGATCTACCAGGACACTTTGGTGGACATCCCTTCCTTCTGGAAGTT  
 CTCAA--AGAGGGCATGAAG---ACAAAGCCCAGCTTGAAGAA--GTC  
 AAAGCCGGCCAGCACAGTCCACCCAGGCCGGGTCAGAGAACCCACAGTGTC  
 AGACCTCAGTACAAACCACTAATGAGGCTAAACTCACAGTCTCCTGGCAG  
 ATCCCATGGAATCTGAAATACCTGAAGGTGAGAGAGGTTCAAATACGAAGT  
 G-----AAAAAAGACACCAGTAAGGGGACACTGGAGGATCAAATCA  
 TCCAGGCGAACCCCTGCGCTGGAGGCCTTCCGCAATGCCAAAACATGAGA  
 AACGACAACCTCGTCTCGTTTTGGAATAATTCATCCGAATTCCTTCGGTAC  
 GAGCGGCAAGCTGTGCTGCTGACATCGAGACGTACCTGCTGGAGAAGT  
 CACGTGTCACCTTTCAGCTCAAGGCTGAGAGGAACTACCACATCTTCTAC  
 CAGATCCTGTCCAATCAGAAGCCAGAGCTCCTGGACATGCTGCTGATCAC  
 CAATAACCCGTACGACTACTCTACATCTCCAAGGAGAGGTAACGGTTG

CTTCCATCAATGACTCAGAGGAGCTGATGGCCACCGACAGCGCCTTCGAT  
GTGCTCGGCTTCACTCCAGACGAGAAGATGGGCGTCTATAAACTGACTGG  
TGCCATCATGCACTACGGCAACATGAAGTTCAAACAGAAGCAGCGTGAGG  
AGCAGGCAGAGCCGGACGGGACGGAGGCTGCTGATAAAACAGCTTACCTA  
ATGGGGCTGAACTCTGCTGACCTCATCAAAGGGCTGTGCCATCCAGAGT  
CAAGGTAGGAAATGAATACGTCACCAAAGGCCAAAGTGTGGATCAAGTCT  
ACTACNNNNNNNNNNNNNNNNNNNNNNNNNNNNNNNNNNNNNNNGGAAGCACTACAACACCAAGCTGGGATATAA  
GCGCCATGTGGCCA  
TGC ACTCTGCCACAGCAGGGGATCTCACCTGTAAAGTGTGCATGCAGACC  
TACGAGAGCACACCCGTGCTCTTGGAGCACCTCAAGAGCCACTCCGGGAA  
GTCTTCGGGTGGCACCAAGGAGAAAAACACCCATGCGATCACTGTGACC  
GTCGTTTCTACACACGGAAGGATGTGAGACGGCACATGGTGGTCCACACA  
GGCCGAAAGGACTTCTGTGCCAGTACTGTGCCAGCGCTTCGGCAGGAA  
GGACCATCTGACGCGCCACGTGAAGAAGAGCCACTCGCAGGAGCTGCTGA  
AGATCAAGACGGAGCCTCCTGATATGTTAGGTCTTTTAGCATCGGGGTCA  
CCACCCCTGCTCTGTGAAGGAGGAGCTCAGCCCCATGATGTGCGGCATGGG  
TCCCAACAAAGACCCCATGATGGGCAAACCGTTCCCCAGTGGGGCCCCTT  
TCCCGATGGGCATGTACAACCCCAACCAT-----CTCCAGGCCATGTCT  
AATTCTGGGGTGGGTCACCCA-----CACCCGTCCCTGATGCCAGTTC  
TTTGTCTGCAGCTATGGGCATGGGCTGTNNNNNNNNNNNNNNNNNNNNNNNNNNNNNNNNNNNNNNNNNNNNNNNNNNNN  
NNNNNNNNNNNNNNNNNNNNNNNNNNNNNNNNNGTGAACCTGCTGGCTAGTAACT  
CTCCGAGTGTTTTCGTATGCTCTGACCAGCAGAAAATACTTCAGTAACCTAC  
AGTCCCCTAATTGGGTTTTACATTTACGAGCCCATAGAGTACTGGAACCTC  
AACGGTGCAGGAGCACCTGAAGACTCTGAGTCATGGCTTCAACAAGATCT  
CCTGGATGGACAACCTTTTTTCCACTACCTGCGGGTGGTGAATGTGAGTGCG  
TCAACCAAGAGTGACTTTCATCACCATCCTCAAGGGCTCCTTCCTGCGCAG  
CCCGGAGTACCAGCACTTCACTGAGGACATCATATTTCTCCAAGA---ACC  
GCGAGACTG-----ATGAGTACGACATTATCGCCTCACGGATGTACTTG  
GTGGCACGGACGACAGAGAAGAAGCGTGAAGAGGTGGTGGAGCTTCTGGA  
GAAGCTTCGTCCGTTGATGCTGATCAACAGCATCAAGTTCATTGCCTTCA  
ATCCTACGTTTTGTGTTTCATGGACCGCTACAGCTCCTCTGTCTATCTCGCCC  
ATCTTGACCTCAGGCTTTCAGCGTACTCACAATCCTCATCCTCACTTTCTT  
CCTGGTCAACCCCTTGAAAACCTCTGNNNNNNNNNNNNNNNNNNNNNNNNNNNNNNNNNNNNNNNNNNNNNNNNNNN  
NNNNNNNNNNNNNNNNNNNNNNNNNNNNNNNNNNNNNNNNNNNNNNNNNNNNNNNNNNNNNNNNNNNNNNNNNNNNNTCTTGCAATGTTG  
GCATTAT  
TAATGGGCTCTCTGGATGGACTTCTCGGTGGATGACTCCCCATCTGACA  
CCATCACTCGGCGGTTTTCGCTATGATGTGGCATTGGTGTGAGCAATAAAG  
GATCTGGAGGAGGACATCATGGAGGGGCTGAGAGAGAGTGGGATGGAAGA  
CAGTGCATGCACCTCAGGCTTCAAGTGCATGATCAAGGAATCTTGTGATG  
GCATGGGCGATGTCAGCGAGAAGCACGGTGGAGGACCAGCTGTTCTGAG  
AAGGCTGTACGTTTCTTTCCTACTGTTATGTCTGTCTCTGTCTGCTGGCAGA  
CGATGAGGAG-----GAGGAGGTTA  
CCATCTTCACCGAGCCAAGCCAACTCAGAACTGTCCTGTAAGCCCCTT  
TTCTGACGTTTGTGGATGAGTCAGACCATGAGACACTCACAGCCATCCT  
GGGGCTATTGTTGAGAGCGTAATGCAATGAAAGAGAGCAGGCTCATCC  
TATCCATGGGTGGACTACCTTGCTCCTTCCGCTTTCCTTTCAGAGGCTCG  
GGATACGATGAGAAGATGGTGGCTGAGATGGAGGGCCTCGAGGCTCAGG  
GTCTCCTATATCTGCACTCTTTGTGACTCCAGTCGGGCAGAAGCCTCTC  
AAAACATGGTGCTACACTCCGTCACCCGCAGTCATGAAGAGAACC TAGAA  
CGTTATGAAATATGGAGAACCAACCCCTTTTCTGAGTCTGTAGATGAGCT  
GCGAGACAGAGTCAAAGGGGTCTCTGCCAAGCCCTTCATGGAGACCCATC  
CCACGCTGGATGCATTACTGTGACATTGGCAATGCCACTGAGTTCCTAC  
AAAACTTCCAGGACGAGATCGGGGAGGTGTACCAAAGGT---CAAC--



AACCCAAAGACCTGAC---ATCAGA---GTCGAGCTGGATAGAG---ACG  
CCGTCTCCATTAAGTCCATTGATCAAGCGATTCTGGTATCTTTG---A  
ACAGGCCAAAAGGAGAAGAATCTCACCTTCTGCCACGCCG-----G  
TTTCAGAGACAGTGTCCCCNNNNNNNNNNNNNNNNNNNNNNNNNNNNNNNNNNNN  
NNNNNNNNNNNNNGTTTCGCGGATGGGGAGGGCGCCTTCAAAATA  
AACCCAGCTCCCACGATATTGGCTCCGG--ACAAACGGCGTTTTCCCTC  
CCAGGCG---CCCGGCTAC---GCAGCAGCCGCCCTGGGA---CACCATC  
A-----CCACCCGACCCACGTTGGCTCT---TACTCCACGGCGGGCGTTC  
AACTCCACCAGGGACTTTCTCTTTCAGAAATCGGGGTTTCGGGGACGCCAC  
CGG-----GGCTCAGCACAGTTTGTTCGCCTC-----CG  
GAAGTTT---C-----GCAGGGCCACATGGACTCAGATGCAGCGGGG  
CACCTGCTCTTCCCAGGGCTCCACGAG---CAAGCGGCGAGCCACGCGTC  
TTCCAATGTGGTCAACAGCCAGATGCGGCTGGGCTTCTCGGGGGACATGT  
ACGGACGGGCCGACCAGTACGGCCACGTTACAAGTCCGCGGT---CCGAC  
CACTATGCTTTCGACCCAGCTGCACGGCTATGGCCCCATGAACATGAATAT  
GGCCGCA---CACACGGAGCAGGGGCCTTCTTTTCGATACATGAGGCAGC  
CGATCAAACAAGAGCTCATCTGCAAGTGGATCGAGCCGGAGCAGCTGACG  
AATCCCAAAAAGTCTGTGCAACAAAACTTTTAGCACGATGCACGAGCTTGT  
GACCCATCTGACGGTGGAGCATGTGGGGGGACCGGAGCAGACGAACCACA  
TCTGCTTCTGGGAGGANNNNNNNNNNNNNNNNNNNNNNNNNNNNNNNNNNNNN  
NNNNNNNNNNNNNNNNNNNNNNNNNNNNNNNNNNNNNNNNNNNNNNNNNNNN  
>Pachypanchax playfairii

-----  
-----  
-----  
-----  
-----  
-----  
-----  
-----  
-----  
-----  
-----  
-----  
-----  
-----  
-----  
-----  
-----  
-----  
-----  
-----  
-----  
-----  
-----  
-----  
-----  
-----

-----NNNNNNNNNNNAACCTTACCCGTCCTGCTGCTGCT  
GTCTGACGCCACAGGTGTACAAAGTTATCAGAGCTCTCTTGGGGCATGT  
GTCTMAGCAATTTTCTGCCATTTGCAAGACAGAGGACTTTCTCCAATG  
CCCAAAGATATGGTAGTGCAGCTGTTGTACACAGAGGAGCTTGAGACAGA  
AGATGAGAGATTGGTTTATGAAGCTGCCCTTAACTGGATTAACTATGACC  
TAGAAAGGAGGCATTTGCCATCTCCAGAGCTCCTGAGRACAGTTCGTCTC  
GCCCTGCTGCCTGCCATCTTTCTAATGGAGAATGTTTCAACAGAAGAGCT  
GATAAATGCCAAAGAAAAGAGCAAGGAGCTGGTGGATGAAGCTATTCGCT  
GTAAGTTGAAGATCTCCAGAATGACGGCGTCGTC AACAGTCCATGTGCT  
CGGCCGAGAAAAACCAGCCATGCCCTTTTCTCCTTCTTGGAGGTGAGACCTT  
CATGTGTGATAAGTTATACTTGGTGGACAAAAGGCCAAAGAGATAATCC  
CAAAAGCTGACATTTCCAGTCCAGGAAGGAGTTTAGTGCCTGCGCCATT  
GGCTGCAAGGTGTACATTACTGGTGGGA--GGGGATC-AGAGAACGGTGT  
GTCCAAAGATGTGTGGGCTCTACGACACTGTGCATGAAGAATGGTCAAGG  
CTGCTCCCATGCTCATGCCCCGGTTTGGTGCATGGCTCTGCAGAACTGAAA

CACTGTCTGTATGTTGTTGGAGGACACACTGCAGCAACCGGCTGCCTCCC  
AGCNNNNNNNNNNAGATGAATACATTGTAGTTTTTCAGCCGTTCAACGACAAGGCTAATAC  
TGAATGAAGCCGAGCTAATCATGGCACTGGCTCAAGAGTTCAGAAAGAGA  
GTAATCACAGTATCTTTGGAGGAACAGTCTTTTTTTAATATCATCCAGGT  
GATCCGTGGTGCTCCATGTTAGTCAGCATGCATGGAGCTCAGCTTATCA  
CCTCACTCTTCCTCCCCAGAGGTGCTGTTGTTGTAGAGCTGTTTCCCTTT  
GCTGTGAATCCTGAGCAGTACACGCCATACAAAACCCTTGCTCCCTTCC  
AGGCATGGATCTTCACTATGTCTCTTGGAGGAACATGAAAGAAGAGAATA  
CTGTAACCCATCCAAATAGACCCTGGGAACAAGGCGGAATATCCCATTTG  
GAAAAAGACGAGCAGGAGCGAATCCTGGCGAGTAAGGACGTCCCAAGGCA  
CTTGTGTTGCCGTAACCCAGAGTGGCTCTTCCGAATTTACCAGGACACTT  
TGGTAGACATCCCATCCTTTCTCAGTGTGCTCAG---AGATGCAATGAAG  
---GCCAAACCCAACTTGAAGAA---GGCCAAGATAGCGAGCACAGTCCA  
TCCTGGCCGGGTCAGAGAAGCCCGTTGTCCAGACTTCAGTTCAAACGTCTA  
ATGAAGCAAAGCTCACAGTCTCTTGGCAGATCCCATGGAATCTGAAATAC  
CTGAAAGTAAGAGAANNNNNNNNNNNNNNNNNNNNNNNNNNNNNN-----  
-----  
-----  
-----  
-----  
-----  
-----  
-----  
-----  
-----  
-----  
-----  
-----  
-----  
-----  
-----  
-----  
-----  
-----  
-----  
-----  
-----  
-----  
-----  
-----  
-----

NNNNNNNNNNNNNNNNNNNNNNNNNNNNNNNNNNNTGTTTACAGATCAGTGATGGGTCA  
AATATAGTGAACCTGTTGGCTAGTAACCTACCAAGTGGTTTCTTATGCTTT  
GACCCAACAGAAGTACTTCAGTAATTATAGTCCGTGCATTTGGGTTTTATA  
TTTACGAACCCATTGAGTATTGGAACCTCACTGTGCAGGAACACCTGAAG  
ACACTAAGTCATGGCTTCAACAAGATCTCCTGGATGGACAACTTCTTCTA  
CTACCTGCGGATGGTGAATGTGAGCGCATCAACTAAGAGCGACTTCATCA  
ATATTTTAAAAGGTTCCTTTCCTGCGCAGCCAGAGTACCAGCACTTCA  
GAGGACATCATCTTCTCCAAA---ACCGTGAGACAG-----ACGAATA  
TGACATCATTGCCTCACGGATGTATTAGTAGCACGGACACAGAGAAGA  
AGCGGGAAGAGGTGGTGGAGCTTTTGGAAAAGCTTCGTCCATTGATGCTG

ATTAACAGCATTAAATTCATTGCCTTCAATCCAACGTTTGTTTTATGGA  
CCGTTACAGCTCCTCTGTCTCATCTCACCCACCCTGACCTCAGGTTTCAGTG  
TACTCACTATTCTCATTTCTAACTTTCTTCCTGGTCATCAACCCCTTGGANNNNNNNNNNNNNNNNNNNNNNN  
NNNNNNNNNNNNNNNNNNNNNNNNNNNNNNNNNNNNNNNNNNNNNNNNNNNNNNNNNNNNNNNNNNNNNNNN  
NNNNNNNNNT  
CTGCATCTTACAGTGTGGCATTATTAATGGTCTTCTGGATGGGCTTCC  
TCGGTGGATGACTCCCCAGCTGACACCATATCTCGACGCTTCCGCTATGA  
TGTGGCACTGGCTGCAGCACTGAAAAGATCTGGAGGAGGACATCATGGAGG  
GGCTTAGAGAGACTGGGATGGAAGACAGCGCTTGCACCCTGGGCTTTAGT  
GTCATGATCAAGGAATGCTGTGACGGCATGGGTGATGTCAGCGAAAAACA  
TGGAGGAGGACCAGCTATTTCCTGAAAAGGCTGTTTCGCTTCTCCTTCACTG  
TTATGTCTGTCTCTGTCCAGTCTGAAGACGATGGT-----  
-----CAAGATGTCACCATATTTCACTGAGCCGAAACCAA  
CTCAGAACTGTCTGTAAAGCCCCTTTCGCTTATGTTTGTGGATGAGTCAG  
ATCATGAGATGCTCACGGCTGTCTGGGGCCCATAGTTGCAGAGCGTAAT  
GCCATGAAGGAAAGCAGGCTCATTTCTGTCCATGGGCGGCATGCCACGCTC  
CTTTTCGCTTCCACTTCAGAGGCACGGGGTACGATGAAAAAATGGTGCGAG  
AGATGGAGGGATTGGAGGCTTCGGGGTCCACATATATCTGCACCTTATGT  
GATTCCAGTCGCGCAGAAGCTGCTCAAAACATGGTGTACTACTCCGTCAC  
CCGCTGCCACGAGGAGAACTTGGAAACGTTATGAAAATATGGAGAACCAACC  
CTTATTTCAGAGTCAGCAGATGAGCTGAGAGACAGAGTCAAAGGAGTCTCT  
GCAAAGCCCTTCATGGAACCCAGCCACTCTTGATGCATTACACTGTGA  
TATTGGTAATGCCACAGAATTTTACAAAATCTTCCAAGATGAGATCGGAG  
AAGTGTATAAAAAGGT---CAAC---CCCAGCCGGGAGGAACGACGCAGC  
TGGAGGGCAGCTTTAGATAAACAGCTGAGGAAGAAGATGAAGCTTAAACC  
AGTAATGAGAATGAATGGAAACTACGCCCGCAGGTTAATGACCATGGAGG  
CTATGGATGTGGTGTGTGAGCTGGTGCCTCAGAGGAAAGGAGAGAAGCC  
CTGAGGGAGCTTATGAGGCTCTACCTCCAGATGAAGCCTGTGTGGCGCGC  
CACCTGCCAGCTAAGGAATGCCCGACCAGCTGTGCCGCTACAGCTTTA  
ACTCCCAGCGCTTTGCTGACCTGCTCTCCTCCACTTTCAAATATAGATAC  
AATGGTAAGATAACTAATTACCTGCACAAGACCCTGGCTCATGTGCCTGA  
AATCATAGAAAGAGATGGATCCATCGGCGCCTGGGCCAGCGAAGGAAACG  
AGTCNNNNNNNNNNNTCATATTTCCATTGAGATGGGTCCCTTGGGGCCACGGTGGAAAGGACA  
ACCCACAGCCTTTCACTTGCTCCATTGAAGACCCTACCAAGCAGACCAAG  
TTCAAGGGTATCAAGACCTACATATCATAACGGGTACACCCGAGTCACAC  
TGGGCTTCCTGTTTACAGACGTTACAAACACTTTGACTGGCTTTACAACC  
GTTTACTGCACAAGTTCCTGTGATTTCCGTTCCCTCACCTCCCAGAGAAG  
CAGGCCACAGGCCGATTTGAGGAAGACTTCATCGAGAAGCGTAAAAGACG  
ATTAATACTGTGGATGAACCACATGACAAGTCACCCAGTCTCTCCAGT  
ATGAAGGTTTTGAGCATTCTCTGATGTGTACTGATGATAAGCAGTGAAA  
CTGGGTAAGAGGCGGGCAGAGAAGGATGAGATGGTAGGGGCCCATTTTCAT  
GCTGACCCTCCAAATCCCCACTGAGCACCAGGACCTTCAGGATGTTGAGG  
AAAGGGTTGACAATTTCAAGACTTTTGCCAAGAAAATGGATGACAGTGTG  
ATGCAGCTCACGCACGTTGCTTCAGAGCTGGTTCGCAAACACCTAGGTGG  
ATTCAGGAAGGAATCCAACGTCTAGGAAATGCCTTCAGTCCATCAGCC  
AAGCATTCATGCTGGATCCACCCTACAAGTCAGATACACTCAACAACGCC  
ATNNNNNNNNNNNNNNNNNNNNNNNNNNNNNAACTGACCTCTCTGGGTTTTATCATTGGAGTTGGTGTGGTAG  
GGAACC  
TCCTGATCTCCATCCTGTTGGTCAAAGACAAGAGTCTGCACCGGGCACCC  
TACTATTTTCTGCTGGACCTGTGCGCCTCTGATATCCTGCGCTCAGCCAT  
CTGTTTCCCCTTTGTCTTCACCTCAGTAAAGAATGGATCTGCCTGGACTT  
ATGGCAGCTAACCTGCAAAGTGATGTCCTTCCCTGGGTGTGCTGTCTTGT  
TTCCACACGGCATTTCATGCTATTCTGCGTCAGTGTACCCGCTACCTGGC



CATAGCACACCACCGCTTCTACACCAAGAGGCTGACTTTCTGGACGTGCT  
TAGCTGTCATCTGCATGGTGTGGACATTGTCAGTGGCTATGGCGTTTCCT  
CCGGTGCTAGATGTTGGAACGTACTCCTTTATCCGGGAGGAGGATCAGTG  
TACATTTTCAGCACCAGTCTTTCAGGGCGAATGATTCAGTGGGCTTCATGC  
TCCTGCTGGCTCTCATCCTCCTGGCCACGCAGCTGGTTTACCTCAAACCTC  
ATTTTCTTTGTCCATGACCGCCGAAAGATGAAGCCTGTTTCAGTTTGTGCC  
TGCTGTCAGCCAGAACTGGACCTTCCACGGGCCAGGCGCCAGTGGGCAGG  
CTGCGGCCAACTGGCTGGCTGGATTTGGTTCGTGGCCCCACCCCGCTACC  
TTGCTGGGTATCCGACAGAACAGCAATGCTGCAGGCCGAGGCGTCTACT  
AGTACTGGACGAATTCAAAACAGAGAAGAGGATTAGCAGGATGTTCTACA  
TAATGACGTTTTTCTTCCCTGGCATTATGGGGGCCCTACCTGGTGCCTGC  
TACTGGCGGGTGTGTTGCAAGGGGCCCGTGGTCCCTGGAGGCTACCTGAC  
AGCAGCCGTGTGGATGAGCTTTGCCAGGCTGGGGTCAATCCCTTCATCT  
GNNNNNNNNNNNNNNNNNNNGCCAAATCTCGCTTTCACCCTGGCGTGGGGACTGGTCCTGGCACGGAGC  
---GCAGCGTCCCACCTCGGCAACAGCTTGCTATCCCCGCAGCAAACCGAG  
GAGCCCACCTGTTGCCACCCCCCGCAGCGATGGTTTGTACCC---CTGC  
CAACAACCGACTGGACTTTGCAGCCTCGGCATACGACGCCGCC-----  
--GATTTTGCCGGTAACGCGGCCACCTTGCTGTCTACGCAGCGGCCGGA  
GTGAAGGCTC-----TCCCCCTGCCGACAGCGGGTTGCTCCAACCGGCC  
TCTTGGCTATTACGCAGACCCGTCTG---GCTGG---GGAGGACGCACGC  
CGCCTCAGTACTGTGGCGTAAACAGTAAATCCAGCTCGGTCTTTTCTCTGC  
TGGCCCGCTAACTCCCTCAGCGGCAGGGCGGCCA---CC---AACTACCT  
GT-----CGGAGGA---GGGA---GACTC---CATCGCGACGGAGA  
GGTCACCG---AT---CGGTGGCTCGGAGGAG---ACCAAACCCAAAGAC  
ATCAC---GTCTGA---GTCGAGCTGGATTGAG---ACGCCGTCTCAAT  
TAAGTCGATTGATTTCGAGTGATTCTGGGATCTTTG---AACAGGCCAAAC  
GGAGAAGAATCTCACCTCTGCTACACCG-----GTCTCAGAATCG  
GTGTCCCCGTTAAAAATCTGAGNNNNNNNNNNNCAGAGAAGTCGCAGAGAGAGAAGTGGCGC  
TGGGGATAAACCCTGTCGCGGATGGGATGGGCGCCTTCAAATAAACCAC  
AGCTCCCACGACATTGGCTCCGG---ACAGACGGCGTTTTCTCTCAGGC  
T---CCCGGCTAC---GCGGCAGCCGCTTTGGGA---CACCATCA-----  
-CCACCCGACCCACGTCGGCTCT---TACTCCACGGCGGCTTTCAACTCC  
ACCAGGGACTTTCTCTTTAGAAATCGGGGTTTCGGAGATGCTACTGG---  
-----GGCGCAGCACAGTCTGTTTGCCTC-----CGGAAGTT  
T---C-----GCAGGGCCACATGGACACTCAGATGCAGCGGGGCACCTG  
CTCTTTCCGGGGCTTCACGAG---CAAGCGGCGAGCCACGCGTCTTCCAA  
CGTGGTCAACAGCCAGATGCGACTGGGCTTCTCGGGGGACATGTACGGAC  
GGGCCGACCAGTACGGCCACGTTACGAGCCCACGAT---CCGACCACTAC  
GCCTCCACTCAGCTGCACGGCTATGGCCCCATGAACATGAATATGGCCGC  
G---CACCACGGAGCAGGGGCCTTCTTCCGATACATGAGGCAGCCGATCA  
AACAAGAGCTTATCTGCAAGTGGATCGAACCAGGAGCAGCTGACGAATCCC  
AAAAAGTCGTGCAACAAAACCTTTCAGCACGATGCACGAGCTTGTGACCCA  
TCTGACGGTGGAGCATGTGGGGGGACCCGAGCAGACCAACCACATCTGCT  
TCTGGGAGGACTGCTCCAGAGAAGGGAAGCCGTTCAAAGCCAAATACAAA  
CTTGTAATCATATCAGAGTTCACACCGGAGAAAAACCCCTTTCCGTGTCC  
GTTCCNNNNNNNNNNNNNNNN

>Paragalaxias mesotes

-----  
-----  
-----  
-----  
-----  
-----

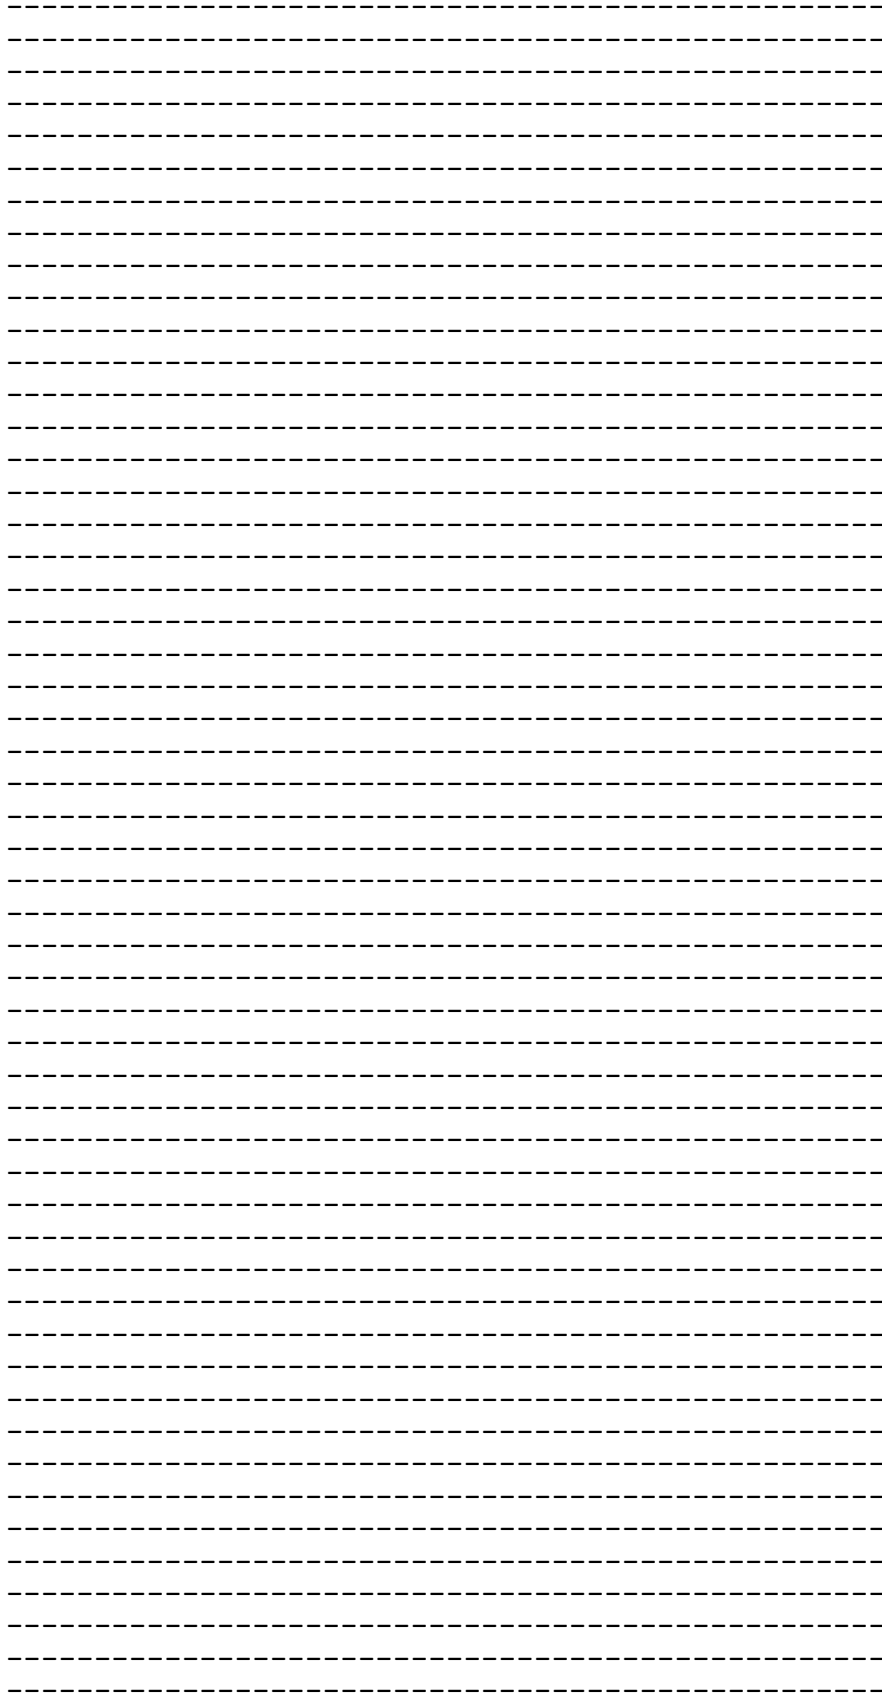



CCCTGACCAGCTGTGCCGCTACAGCTTCAACTCGCAGCGCTTCGCCGAGC  
TCCTCTCCACCACCTTCAAGTACAGGTATAACGGCAAGATCACCAACTAC  
CTCCACAAAACGCTGGCCCATGTGCCCGAGATCATAGAGAGGGATGGGTC  
CATTGGAGCGTGGGCCAGCGAGGGGAATGAGTCGGGCAACAAG-----

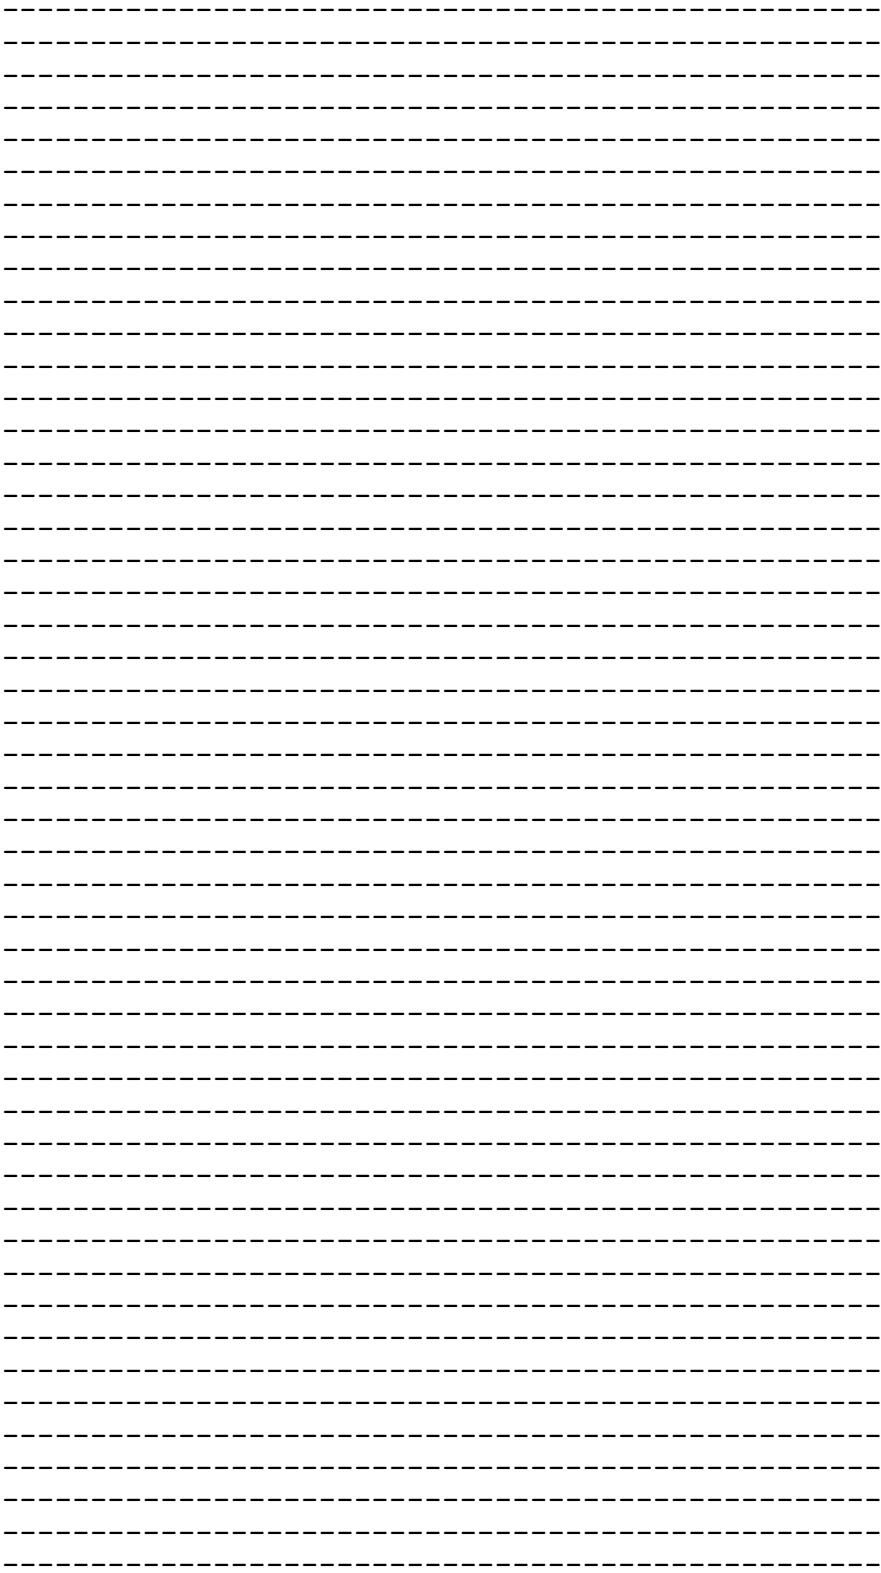



GGCCAGGAGTTCCAGATGAGAGTGGTCACGGTGTCCCTTGAGGAGCAGT  
CTTTCCCCAGTATCGTCCAGGTGATCAGCGGTGCGTCCGTGTTGGTCAGT  
ATGCATGGTGCTCAGCTCATCACCTCACTCTTCCTCCCCAGAGGAGCTGC  
TGTGGTGGAGCTGTTCCCTTTGCCGTGAACCCAGAGCAGTACACCCCGT  
ATAAAACCTTGCCACCCTTCCAGGCATGGACCTTCACTATATCTCCTGG  
AGGAACACTCKGGAGGAGAACACCATCACCCACCTGACAGAGCCTGGGA  
GCAAGGGGGCATCGTCACTTGGAGAAGGAGGAGCAAGAGCGTATACTGG  
CGAGCAAAGATGTCCCCAGGCACCTGTGCTGTGCAACCCGGAGTGGCTC  
TTCCGGATCTACCAGGACACTTTGGTGGACATCCCTTCCTTCTGGAAAM  
CCTGAA---AGAGGGCATGAAG---ACRAAGCCCAGCGTGAAGAA---GT  
CAAAGCCAGCCAGCACAGTCCACCCGGGCGGGTCCGAGAACCCAGTGT  
CAGACCTCGGTACAAACCACCAACGAGGCCAAACTCACAGTCTCCTGGCA  
GATCCCGTGGAATCTGAAGTACTTGAAGGTGCGAGAGGTGAAGTACGAGG  
TGTGGATCCAGAAGAGAGACCCGAGCAAGGGGACGCTGGAGGACCAGATC  
GTCCAGGCCAACCCGGCGCTGGAGGCTTTCGGCAACGCCAAAACGCTGAG  
AAACGACAACCTCGTCTCGTTTTGGAAAATTCATCCGCATTCACTTCGGTA  
TGAGCGGGAAGCTGTGCTCCGCCGACATCGAGACCTACCTGCTGGAGAAG  
TCCCGGTGCACCTTCCAGCTCAAGGCTGAGAGGAACTACCACATCTTCTA  
CCAGATCCTGTCCAATCAGAAGCCAGAGCTGCTGGACATGCTGCTGATCA  
CCAACAACCCGTACGACTACTCCTACATCTCCCAAGGGGAGGTCACCGTC  
GCCTCCATCAACGACTCGGAGGAGCTGMTGGCCACCGACTGCGCCTTCGA  
CGTGCTGGGCTTCACCGCAGAGGAGAAGATGGGCATCTATAAACTCACCG  
GCGCCATCATGCACTTCGGCAACATGAAGTTCAAACAGAAGCAGCGCGAG  
GAGCAGGCGGAGTCCGACGGCACGGAGGCGGCCGATAAGACGGCGTACCT  
CATGGCCTGAACTCCGCCGACATCATCAAGGGCTGTGCCACCCAGAG  
TCAAGGTGGGGAATGAGTACGTCACCAAAGGCCAGAGTGTGGACCAGGTC  
TACTAC-----

-----  
-----  
-----  
-----  
-----  
-----  
-----  
-----  
-----  
-----  
-----  
-----  
-----  
-----  
-----  
-----  
-----  
-----  
-----  
-----

-----TATCTCATCTACGCCTCTTTCTCATTCA  
TGGGATGTTTACAGATCAGTGATGGATCAAATATAGTGAACCTGCTGGCT  
AGTAACTCCCCGAGTGTGTCTTACGCTCTGACGCAGCAGAAGTACTTAC  
CAACTACAGTCCCGTGATTGGGTTCTACATTTACGAGCCCATCGAGTACT  
GGAACTCCACGGTGCAGGGGCATCTGAAGACCCTGAGTCATGGCTTCAAC  
AAGATCTCTTGGATGGACAACCTTTTCCACTACCTGCGTGTGGTGAACGT  
GAGGCATCAACCAAGGGCGATTTTCACTACTATCCTCAAGGGCTCCTTCC  
TTCGCAGCCCGGAGTACCAGCACTTACAGAGGACATAATATTCTCCAAG  
A---ACCGCGAGACTG-----ACGAGTACGACATCATCGCCTCGCGGAT  
ATACCTGGTGGCACGAACGACGGAGAGAAAACGCGAGGAGGTGGTGGAGC  
TTCTAGAAAAGCTTCGTCCCTTAATGCTGATCAACAGCATCAAGTTCATC  
GCCTACAATCCCACGTTTGTGTTTCATGGACCGCTACAGCTCCTCTGTCAT  
CTCGCCATCCTGACCTCAGGGTTCAGCGTACTACAATCCTCATCCTCA  
CTTCTTCCTGGTCATCAACCCGTTGGGAACTTTGGCTCATCCTCACG

GTGACCTCCGTAGAGCTCGGCGTCTTGGGTTTGATGNNNNNNNNNNNNNNNNNNNNNNNNNNNNNNNNNNNNNNNNNNNNNNNNNNNN  
NNNNNNNGTCTACATCTTGCA

GTGTTGGCATTATCAATGGGCTCTCTGGATGGGCTTCCTCGGTGGATGAT  
TTCCCAGCTGACACCATCACTAGACGGTTCGCTACGATGTGGCTCTGGT  
GTCAGCGTTGAAGGATCTGGAGGAGGACATCTTGGAGGGGCTGAGAGAGA  
GTGGGATGGAAGACAGTGCTTGCACTCATGCTTCAAGTGTCAAGATCAAG  
GAATCCTGTGATGGCATGGGCGATGTCAACGAGAAGCACGGTGGAGGACC  
AGCTGTTCTGAGAAGGTTGTGCGTTTTTCTTTCACTGTTATGTCGGTCT  
CTGTCCGGCAGACGATGAGGAG-----  
---GAAGACGTTACCATCTTCACTGAGCCAAAGCCAAACTCAGAAGTGT  
CTGTAAGCCCCTGTGCCTGATGTTTGTGGATGAGTCAGACCATGAGACAC  
TCACAGCTGTCTGGGGCCTGTGGTTGCCGAGCGTAATGCAATGAAAGAG  
AGCAACCTCATCTGTCCGTGGGCGGACTTCCTCGTTCCCTCCGCTTTCA  
CTTCAGAGGCACAGGATATGATGAGAAGATGGTGC GCGAGGTGAGGGCA  
TGGAGGCCTCAGGGTCCACCTACGCTGCACTCTTTGTGACTCCACTCGG  
GCACAGGCCTCTCAAACATGGTGCAACACTCCATCACTCGCAGTCATGA  
AGAGAACCTCGATCGTTACGAAATATGGAGAACCAACCCCTTTTCTGAGT  
CTGTAGATGAGCTGCGCGACAGGGTTAAAGGGATCTCTGCCAAGCCCTTC  
ATGGAGACCCACCCAACGATGGATGCATTACATTGTGACATCGGCAATGC  
CACTGAGTTCTACAAAATCTTCCAGGACGAGATCGGAGAGGTGTACAAA  
AGTT---CAA---CCAGCCGGGTGGAACGGCGCAGCTGGAGAGCAGCC  
CTGGATAAACAGCTTAGGAAGAAAATGAAGCTTAGACCAGTGATGAGGAT  
GAATGGGAACATATGCCCGCAGGCTTATGACCCAAGAGGCTGTGGAGGTGA  
TCTGTGAGCTAGTGCCCTCAGAGGAGAGGAGGGAGGCTCTGAGGGAGCTG  
ATGAGGATCTACATCCAGATGAAGCCGGTGTGGCGGCCACCTGCCCTGC  
TAAGGAGTGTCCCGACCAGCTGTGCCGCTACAACCTTAACTCCCAGCGCT  
TTGCCGAACCTCTCTCCTCCACCTTCAAATACAGGTACAATGGAAAGATA  
ACCAATTACCTGCACAAGACCCTGGCCCATGTGCCCTGAAATCATAGAGAG  
AGATGGATCCATCGGAGCCTGGGCCAGCGAAGGAAACGAGTCNNNNNNNNNNNTCCTACAC  
CGTGCAGATGGGACCCGCGGGGGCCCCGGTGGCAGGAGAGCCCGCAGCCGT  
TCTCCTGCTCCGTCGAGGACCCACGAAACAGACCAAGTTCAAGGGCATC  
AAGACCTACATCTCGTACCGGGTCACGCCGAGCCACACGGGGCGTCCCCT  
CTACCGGCGCTACAAACACTTCGACTGGCTGTACAACCGCCTGCTGCACA  
AGTTCACCGTGATCTCGGTGCCCCACCTGCCCGAGAAGCAGGCCACGGGG  
CGCTTCGAGGAGGACTTCATCGAGAAGCGCAAGCGGCGGCTGGTCTGTG  
GATGAACCACATGACCAGCCACCCGGTCCCTCCTCCAGTACGAGGGCTTCG  
AGCACTTCCCTGACGTGCGCCGACGACAAGCAGTGAAGCTGGGCAAGAGG  
CGGGCGGAGAAGGAGGAGATGGTGGGCGCCACTTCATGCTGACCCTGCA  
GATCCCAACGAGCACCAGGACCTTCAGGACGTGGAGGAGCGGATCGACA  
CCTTCAAGGCCTTCGCCAAGAAAATGGACGACAGCGTGATGCAGCTCRCG  
CACGTCGCCTCGGAGCTGGTGC GTAAGCACCTGGGCGGCTTCCGGAAGGA  
GTTCCAGCGGCTGGGGAATTCGTTCCAGTCCGTGAGCCTGGCGTTCACGC  
TGGACCCTCCCCACGGCTCGGAGGCCCTCAACAAAGCCGTCTCCAC---

-----  
-----  
-----  
-----  
-----  
-----  
-----  
-----  
-----  
-----

-----  
-----  
-----  
-----  
-----  
-----  
-----  
-----  
-----  
-----  
-----

-----GCCAAATCTCGCTTTC  
ACCCTGGCGTGGGGACTGGTCTGGCACGGAGC---GCAGCGTCCCCTC  
GGCCACAGCTTGTGTCCCCGACGAAACCGACGAGCCAGTGTGCCAC  
CCCCCGCAGCGATGGTTTGTACCC---CTGCCAACAACCGACTGGACT  
TTGTGCCTCGGCATACGACGCCGCT-----GATTTGCGCCGGTAAAC  
GCGGCCACCTTGTGTCTACGCAGCGGCCGGAGTGAAGGCTC-----T  
TCCCCTGCCGACTGCAGGCTGTCCAACCGGGCTCTTGGCTATTACGCAG  
ACCCGTCAG---GCTGG---GGAGGACGCACACCGCCGACGACTGCGGC  
GTAAACAACAAATCCAGCTCGGTCTTTTCCTGTGGCCCGCTAACTCTAT  
CGGGGGCCGAGCAGGTA---CC---AACTACCTGG-----CCGAGG  
A---AGGA---GACTC---CATCACGACAGAGAGGTCGCCG---AT---C  
GGCGGCTCGGACGAG---ACCAAACCAAAGACATGAC---ATCAGA---  
GTCGAGCTGGATAGAG---ACACCGTCTCCATTAAGTCCATTGATTCGA  
GCGATTCTGGTATCTTTG---AACAGGCCAAACGGAGAAGAATCTCACCT  
TCTGCCACGCCG-----GTTTCAGAGACAGTGWCCCCGTTAAAATC  
TGAGNNNNNNNNNNNNNNNNNNNNNNNNNNNNNNNNNNNNNNNNNNNNNN  
NNNNNNNNNTTCAAATAAACCACAGCTCCACGATATCGGCTCCGG---ACAAA  
CGGCGTTTTCTCCCAGGCG---CCTGGCTAC---GCGGCAGCCGCCCTA  
GGA---CACCATCA-----CCACCCGAGCCACGTTGGCTCT---TACTC  
CACGGCGGCTTTCAACTCCACGAGGGACTTTCTCTTCAGAAATCGGGGGT  
TCGGGGACGCCACCGG-----GGCACAGCATAGTTTGTTCGCC  
TC-----CGGAAGTTT---C-----GCTGGGCCACATGGACACTC  
AGATGCAGCGGGGCACCTGTCTTCCCAGGGCTCCATGAG---CAAGCGG  
CGAGCCATGCGTCTTCCAACGTGGTCAACAGCCAGATGCGACTGGGCTTC  
TCGGGGACATGTACGGACGGGCCGACCAGTACGGCCACGTTACGAGCCC  
GCGGT---CCGACCACTACGCTTCGACCCAGCTGCACGGCTATGGCCCCA  
TGAACATGAATATGGCCGCA---CACACGGAGCAGGGGCCTTCTTTCGA  
TACATGAGGCAGCCGATCAAGCAAGAGCTCATCTGCAAGTGGATCGAGCC  
GGAGCAGCTGACGAATCCTAAAAAGTCGTGCAACAAAACCTTTTAGCACGA  
TGCACGAGCTTGTGACCCATCTGACGGTGGAGCATGTGGGGGGACCGGAG  
CAGACCAACCACATCTGCTTCTGGGAGGAATGTGCCAGAGAGGGAAAGCC  
ATTCAAAGCCAANNNNNNNNNNNNNNNNNNNNNNNNNNNNNNNNNNNNNN  
NNNNNNNNNNNNNNNNNNNNNNNNNNNNNNNNNNNNNNNNNNNNNNNNNNNN

>Parapercis clathrata  
AGCCTTCTTATTTCGAGCAGAATAAGTCAACCAGGTGCTCTTCTAGGAGA  
CGACCAATTTATAATGTTATCGTTACAGCCCATGCCTTCGTAATAATTT  
TCTTTATAGTAATGCCTATTATAATCGGGGGCTTCGGTAACTGATTAGTC  
CCTCTGATAATTGGAGCTCCGGACATAGCATTCCCCGTATAAACAATAT  
AAGCTTTTACTTCTCCCTCCTTCCCTCCTTCTTCTTCTTAGCCTCTTCCG  
CAGTAGAGGCCGGAGCCGGAACCTGGATGAACCGTGTATCCCCCTCTAGCC  
GGAAACCTAGCTCACGCAGGGGCATCAGTAGACTTAACCATTTTCTCCCT  
GCATTTAGCTGGCATTTCATCTATTTTAGGGGCCATCAACTTCATCACAA  
CTATTCTTAATATGAAACCTCCAGCAGTCAACCAATATCAGACCCCTCTC  
TTTGTCTGAGCCGTTCTAATCACTGCTGTCTCTCCTCCTCCTCCTCCC





AAGAGTCACTCTGGAAAGTCTTCAGGTGGCACCAAGGAGAAAAACACCC  
GTGCGATCACTGTGACCGCGTTTCTATACGCGAAAGGATGTGAGACGGC  
ACATGGTGGTTACACGGGCGAAAGGACTTTCTGTGCCAGTACTGTGCC  
CAGCGCTTTGGCAGGAAGGACCATCTGACACGTCATGTGAAGAAGAGCCA  
CTCACAGGAGCTCCTGAAGATTAAGACAGAGCCTCCTGATATGTTAGGTC  
TTTTAGCTTCGGGGTCACCGCGTGTCTGTGAAGGAGGAGCTCAGCCCC  
ATGATGTGCAGCATGGGTCCCAACAAAGATCCCATGATGGGCAAACCCTT  
CTCCAGTGGGCCTCCTTTTCCAATGGGCATGTACAACCCCCACCAT----  
--CTTCAGGCCATGTCTAATTCTGGGGTGGGTACCCG-----CACCCG  
TCCCTGATGCCTAGTTCCTTATCTGCAGCTATGGGCATGGGCTGTCACAT  
GGAATATCTCATATACGCCTCTTTCTCGTTCATGGGATGTTTACAAATTA  
GTGATGGATCGAATATCGTGAACCTGCTGGCGAGTAACTCTCCAAGCGTT  
TCGTACGCTATGACCCAGCAGAAGTACTTCAGTAACTACAGTCCCGTGAT  
TGGGTTTTACATTTACGAGCCCATCGAGTACTGGAACCTCGACTGTGCAGG  
AGCACCTGAAGACTNTGAGTCATGGGTTCACAAGATCTCCTGGATGGACA  
ACTTTTTCCACTACCTGCGGGTGGTGAATGTGAGTGCCTCAACAAAGAGC  
GACTTCATCACCATTCTCAAGGGCTCCTTCCTGCGCAGCCCGGAGTACCA  
GCACTTCACAGAGGACATCATATTCTCCAAGA---ACAGGGAGACCG---  
---ATGAGTACGACATTATCGCCTCACGGATGTACTTGGTTCGCACGAACG  
ACAGAGAAGAAGCGGGAAGAGGTGGTGGAGCTTCTGGAGAAGCTTCGTCC  
GCTGATGCTGATCAACAGCATCAAATTCATTGCCTTCAACCCACGTTTG  
TGTTTATGGACCGCTACAGCTCCTCCGTTCATCTCGCCCATCCTGACCTCA  
GGCTTCAGCGTGTCTACAATCCTCATCCTCACTTTCTTCTGCTCATCAA  
CCCCTTGGGGAACCTTGGCTCATCCTCACAGTAACTCCGTGGAGCTGG  
GTGTNNNNNNNNNNNNNGGCTTTCACCAGTTTGAATGGCAGCCCGCTCTCAAGACTGTGTCTA  
CATCTTGCAACATTGGCATTATTAATGGGCTCTCTGGATGGGCTTCGTCCG  
GTGGATGACGCCCCGGCTGACACCATCACTCGGCGCTTTCGCTATGATGT  
GGCACTGGTGTACGCTTTAAAGGATCTGGAGGAGGACATCATGGAGGGGC  
TGAGAGAGCGTGGGCTGGAAGACAGCGCTTGCACCTCAGGCTTCAGTGT  
ATGATCAAAGAGTCTGTGATGGCATGGGCGATGTCAGCGAGAAGCACGG  
CGGAGGACCAGTTGTTCCCGAGAAGGCTGTACGTTTCTTTTCACTGTTA  
TGCTATCTCTGTCCGGGCAGACGAGGAGGAG-----  
-----GAAGAGTTTACCATCTTCACTGAGCTGAAGCCAAACTC  
GGAGCTGTCTGCAAGCCCCCTGCTGCTGATGTTCTGTGGATGAGTCAGACC  
ACGAGACGCTCACTGCTGTCTGGGGCTATAGTGGCGGAGCGTAAGGCG  
ATGCAACAGAGCCGGCTCATCCTTCCATCGGTGGACTGCCTCGCTTCTT  
CCGCTTCCATTTTCAAGGAACAGGGTACGACGAGAAGATGGTGCCTGAGA  
TGGAGGGCCTCGAGGCCTCGGGATCCGCCTACATCTGCACCCTTTGTGAC  
TCCAGTTCGCGCAGAGGCTTCTGAGAACATGGTGTGCTGCACTCGGTCACACG  
CAGTCACGAGGAGAACTTAGAGCGTTATGAAATATGGAGAAGCAACCCCT  
TCTCTGAGTCTGCGGAAGAGCTGCGAGACAGAGTCAAAGGGGTCTCTGCT  
AAGCCGTTTATGGAGACCCAGCCAACGCTCGATGCATTACACTGTGACAT  
TGGCAATGCCACCGAGTTCTACAAAATCTTCCAGGACGAGATTGGGGAGG  
TGTACAAAAGGT---CAAC---CCCACACGGGAGGAGCGGCGCAGCTGG  
AGGGCAGCCCTAGATAAACAGCTGAGGAAGAAAATGAAGCTTAAACCAGT  
AATGAGGATGAATGGGAACCTTGGCCGAGGCTAATGACCCTGGAAACTG  
TGGAGGTGGTGTGTGAGCTGGTGGCCCTCAGAGGAGAGGAGGGAGGCCCTG  
AGGGAGCTCATGAGGCTTACCTCCAGATGAAGCCCGTGTGGCGAGCCAC  
CTGCCAGTCAAGGAATGCCCGACCAGCTGTGCCGCTACAGCTTTAACT  
CCCAGCACTTCGCCGACCTCCTCTCTACCTTCAAATACAGGTACAAC  
GGGAAGATAACCAATTACCTGCACAAGACCCTGGCCCACGTGCCTGAGAT  
CATCGAGAGAGACGGGTCCATCGGAGCCTGGGCCAGCGAGGGAGACGAGT  
CAGCCAACAAATCGTACACCATCGACATGGGTCTTTGGGTCCCCGTGG









-----  
-----  
-----  
-----  
-----GCCAAATCTCGCTTT  
CACCCCTGGCATGGGGACTGGTCCTGGCACGGAGC---GCAGCGTCCC  
CGGCAACAGCTTGCTATCCCCGAGCAAACCGAGGAGCCCACTGTTGCCA  
CCCCCCCGCAGCGATGGTTTGTACCC---CTGCCAACAACCGACTGGAC  
TTTGTCTGCCTCGGCATACGACGCCGCC-----GATTTCCGCCGTTAA  
CGCGGCCACCTTGCTGTCTTACGCAGCGGCCGGAGTGAAGGCTC-----  
TTCCCTGCCGACTGCAGGCTGCTCCAACCGCCTCTTGGCTATTACGCA  
GACCCGTCGG---GCTGG---GGAGGACGCACGCCGCCGAGTACTGCGG  
CGTAAATAGCAAATCCAGCTCGGTCTTTTCTGCTGGCCCGCTAACTCTA  
TCGGTGGCAGAGCCGGAG---CC---AACTACCTGG-----CCGAG  
GA---GGGA---GACTC---CATCCCGACGGAGAGGTCACCG---AT---  
CGGCGGCTCGGAGGAG---GCCAAACCCAAAGACCTGAC---GTCGGA--  
-GTCGAGCTGGATAGAG---ACGCCGTCCTCCATTAAGTCCATCGATTCTG  
AGCGACTCTGGGATCTTTG---AACAGGCCAAAAGGAGGAGAATCTCCCC  
CTCTGCCACGCCG-----GTTTCAGAGACTGTGTCCCCGTTAAAAT  
CGGAG-----TGGGG  
ATAAATCCGTTTGCGGATGGGATGGGCGCCTTCAAATAAACACAGCTC  
CCACGACATCGGCTCCGG---ACAAACGGCGTTTCTCCAGGCG---C  
CCGGCTAC---GCAGCGGCCGCCCTGGGA---CACCACCA-----CCAC  
CCGACCCACGTTGGCTCT---TACTCCACGGCGGCTTCAACTCCACCAG  
GGACTTCTCTTTCAGAAATCGGGGTTCGGGGACGCCACCG-----  
----GGCGCAGCACAGTTTGTTCGCCTC-----CGGAAGTTT---C  
-----GCAGGGCCACATGGACTCGGATGCGGCGGGGACCTGCTCTT  
CCCGGGGCTCCACGAG---CAGGCGGAGCCATGCGTCTTCCAACGTGG  
TCAACAGCCAGATGCGACTGGGCTTACGGGGGACATGTACGGACGGGCC  
GACCAGTACGGCCACGTTACGAGCCCGCGGT---CCGACCACTACGCCTC  
GACCCAGCTGCACGGCTACGGCCCCATGAACATGAATATGGCCGCA---C  
AYCACGGAGCAGGGGCCTTCTTTGATACATGAGGCAGCCGATCAAACAA  
GAGCTCATCTGCAAGTGGATCGAGCCGGAGCAGCTGACGAATCCAAAAA  
GTCGTGCAACAAAACTTTTAGCACGATGCACGAGCTCGTGACCCATCTGA  
CGGTGGAGCATGTGGGGGGACCCGGAGCAGACCAACCACATCTGCTT----  
-----

>Parasudis truculenta









-----  
 -----  
 -----  
 -----  
 -----  
 -----  
 -----  
 -----  
 -----  
 -----

>Paratilapia polleni  
 AGCCTGCTAATCCGGGCAGAATTAAGCCAACCGGGCTCTCTTCTTGGAGA  
 TGATCAAATTTACAATGTAATCGTAACTGCACACGCTTTTGTAAATAATCT  
 TCTTTATAGTAATGCCAATTATGATCGGAGGCTTCGGAAACTGATTAGTC  
 CCTTCTATGATTGGGGCCCTGATATAGCCTTCCCTCGAATGAATAATAT  
 GAGCTTCTGGCTTCTCCCGCCGTCATTTCTTCTCCTCTTAGCCTCTTCAG  
 GCGTTGAAGCTGGAGCTGGAACAGGATGAACTGTCTATCCCCCTTAGCA  
 GGCAACCTGGCCCACGCTGGTCCATCCGTTGATTTAACAATTTTCTCTCT  
 TCATCTAGCCGGAGTCTCCTCCATCCTAGGGGCTATTAATTTTATTACTA  
 CAATTATTAATATGAAACCTCCTGCTATTTTACAGTACCAAACACCTCTC  
 TTTGTCTGTTCTGTTCTTATTACGGCCGTTCTCCTTCTCCTTTCTTCTTCT  
 AGTTCCTTGC CGCCGCATTACCATGCTCCTGACAGACCGAAATCTTAACA  
 CAACCTTTTTTCGACCCTGCAGGAGGAGGCGACCCATTTCTATAACCAACAC

-----  
 -----  
 -----

-----TTCCTGGAGAGAAACCTCCACCCGTCCAACCTGTCTTGG  
 CATGCTTCTGCTGTCAGATGCCCATCAGTGTACCAAGTTGTCAGAGCTCT  
 CCTGGGGCATGTGCCCTCAGCAACTTCCCTGCTATTTGCAAGACAGAGGAC  
 TTCCCTCAACTGCCCCAAGATATGGTGGTGCAGCTTTTGT CACACGAGGA  
 GCTAGAGACAGAAGATGAAAGACTGGTTTATGAAGCTGCCCTTAACTGGA  
 TCAACTACGACCTGGAAAGGAGGCACTGCCATCTTCCGGAGCTCCTGAGA  
 ACGGTCCGCCTTGCACTGTTGCCCGCCATCTTTTAAATGGAGAACGTCTC  
 AACAGAAGAGCTGATTAACTCCCAGGCCAAGAGCAAGGAGCTGGTGATG  
 AAGCTATCCGCTGTAAGCTGAAGATCCTTCAGAAATGATGGCGTTGTTAAC  
 AGCCCATGTGCTCGACCAAGAAAAACTAGCCATGCCCTCTTCTTCTGGG  
 GGGGCAGACTTTCATGTGTGACAAGTTGTACCTGGTGACCAGAAAGGCCA  
 AAGAGATCATCCCAAAGGCTGACATCCCCAGTCCCCGGAAGGAGTTCAGT  
 GCCTGTGCCATTGGCTGTAAGGTGTACATCACAGGTGGGA--GAGGCTC-  
 AGAGAATGGTGTGTCCAAGATGTGTGGGTCTATGACACTGTGCATGAGG  
 AATGGTCAAAGGCGGCTCCCATGCTCATCGCCAGGTTTGGCCATGGCTCT  
 GCTGAGCTGAAACACTGTCTCTACGTTGTAGGAGGTCACACTGCAGCAAC  
 CGGCTGCCTTCCAGCATCTCCGTCAAGATGAATACATTGTTGTGTTTCT  
 CGTTCAACAACAAGACTGATACTGAATGAAGCAGAGCTAATTATGGCGCT  
 GGCCCAAGAGTTCCAGATGAGAGTGGTCACAGTGTCCTTGGAAAGAAGT  
 CTTTCCCCAGTATTGTCAGGATGATCAGCGGTGCTTCCATGTTAGTTAGT  
 ATGCATGGAGCTCAGCTTATCACCCTCGCTCTTCCCTCCCTAGAGGTGCTGC  
 TGTCGTGGAGCTGTTCCCCTTTGCTGTGAACCCAGAGCAGTACACACCAT  
 ATAAAACCCTTGCCCTCCCTTCCAGGCATGGCCCTTCACTATGTCTCTTGG  
 AGGAACACTAAGGAGGAGAACACTGTCACCCACCCAGACAGGCCCTGGGA  
 GCAAGGAGGCAATTGCTCACTTGGAAAAAGAGGAGCAGGAGCGAATCCTGG  
 CAAGCAAGGACGTCCCCAGGCACCTTTGCTGCCGCAATCCAGAGTGGCTC

TTCAGGATATAACCAGGACACTTTGGTGGACATCCCATCCTTCTGGAAGT  
CCTCAA---AGAAGGCATGAAG---ACTAAGCCCAGCTTAAAAA---AG  
CCAAGGTAGCCAGCATGGTCCATCCGGGCCGGGTCAGAGAACCCAAATGT  
CACACTTCAGTACAAACCTAATGAGGCTAGACTCACAGTCTCTTGGCA  
GATCCCGTGAATCTGAAATTCCTGAAAGTGAGAGAGGTGAAGTATGAAG  
TGTGGATCCAGAAAAAGACAGCAGCAAGGGGACCCTGGAGGATCAAATC  
ATCCAGGCGAACCCGGCACTGGAGGCCTTTGGCAACGCCAAAACGGTGAG  
AAATGACAACCTCATCTCGTTTTGGAAAATTTATCCGAATCCATTTTGGCA  
CGAGCGGCAAGCTGTCATCTGCCGACATTGAGACATACCTGCTGGAGAAG  
TCACGAGTCACCTTTCAGCTGAAGTCCGAAAGGAACTACCATATCTTCTA  
CCAGATCCTGTCCAATCAGAAGCCAGAGCTGTTGGACATGCTGCTGATCA  
CCAACAATCCGTACGACTACTCTTACATCTCCCAAGGAGAGGTAACAGTC  
GCCTCCATCAATGACTCAGAGGAGCTCATGGCCACTGATGGTGCCTTTGA  
TGTGCTTGGCTTCACTCCAGAGGAGAAGATGAGTGTCTACAAGCTGACCG  
GTGCTATCATGCACTACGGCAACATGAAGTTCAAAACAGAAGCAGCGCGAG  
GAGCAGGCTGAACCTGACGGAACCGAGGCTGCTGATAAATCAGCTTACCT  
AATGGGGCTGAACTCTGCTGATCTCATCAAAGGGCTGTGTCAACCCCGAG  
TGAAGGTAGGAAATGAATATGTCACAAAAGGGCAGAGTGTGGACCAAGTC  
TATTATCCCAACAAAAGAGGCCTTTAAGTGTGAGGAGTGTGGGAAGCACTA  
CAACACCAAGCTGGGATACAAGCGCCATGTGGCCATGCACTCCGCCACAG  
CGGGGGATCTCACCTGTAAAGTGTGCATGCAGAGCTATGAGAGCACGCCT  
GTTCTACTGGAGCACCTCAAGAGCCACTCCGAAAAGTCCCTCGGGTGGTGC  
CAAGGAGAAAAAACACCCCGTGCACCCTGTGACCGGCGTTTTCTACACGC  
GGAAGGATGTGAGACGACACATGGTGGTCCACACGGGCCGAAAGGACTTC  
CTATGCCAGTACTGTGCCAGCGCTTTGGCAGGAAAGACCATCTGACCCG  
CCATGTGAAGAAGAGCCACTCACAGGAGCTGCTGAAGATCAAGACGGAGC  
CTCCGATATGCTGGGTCTTTTAGCCACGGGGTCTCCACCCTGCTCTGTG  
AAGGAGGAGCTCAGCCCATGATGTGCGGCATGGGGCCCAACAAAGACCC  
CATGATGGGCAAACCATTCCCTAGCGGGGCACCTTTTCCGATGGGCATGT  
ACAACCCCAACCAT-----CTCCAGGCCATGTCGAATTCTGGGGTGGGT  
CACCCA-----CATCCATCCCTGATGCCAGCTCCTTGTCTGCAGCTAT  
GGGCATGGGCTGTCACATGGAATATCTCATTATATGCCTCTTTCTCATTCA  
TGGGATGTTTACAAATCAGTGATGGGTGCAATATGTTGAACCTGCTGGCA  
AGTAACTCTCCAAGTGTTCATACGCTGTGACCCAGCAGAAATACTTTAG  
TAACTACAGTCCAGTGATTGGGTTTTATATTTATGAACCTATTGAGTACT  
GGAATCCACGGTGCAGGAGCACCTGAAGACTCTGAGTCACGGTTTCAAC  
AAGATCTCCTGGATGGACAACTTTTTCCACTACCTGCGGGTAGTGAATGT  
GAGTGCATCAACTAAGAACGACTTCATCACCATCCTTAAGGGTTCCTTCC  
TGCGCAGCCCAGAGTACCAGCACTTCACTGAGGACATCATATTTCCAAG  
A---ACAGCGAGACTG-----ATGAATACGACATTATTGCCTCAAGAAT  
GTATTTGGTAGCACGGACCACTGAGAAGAAGCGTGAGGAGGTGGTGGAGC  
TTTTGGAAAAGTTGCGTCCCTTGATGCTGATCAACAGCATCAAATTCATT  
GCCTTCAATCCTACGTTTGTGTTTCATGGATCGGTACAGCTCCTCTGTCAT  
CTCACCAATTCTGACCTCAGGCTTCAGTGTACTCACCATCCTCATCCTCA  
CTTTCTTCCCTGGTCATCAACCCCTTGGGAAACTTTTGGCTCATCCTCACT  
GTTACGTCCTGTGGAGCTGGGCGTTTTGGGTTTGGTGGTGGTGGTGGTGGT  
TGAATGGCAGCCAGCTCTCAAGAATGTGTCCCATCCTATAATGTTGGCA  
TTATTAATGGGGTCTCTGGGTGGTCTTCCACAGTGGATGATGCCCCAGCT  
GACACCATCACTCGGCGCTTTCGCTATGATGTGGCACTGGTGTCTGCTTT  
AAAGGATCTGGAGGAGGACATCATGGAGGGGCTGAGAGAGAGTGGGATGG  
AAGACAGTGCCTGCACATCAGGCTTTAGTGTGATGATCAAGGAATGTTGC  
GATGGCATGGGTGATGTCAGCGAGAAGCATGGCGGAGGACCGGTTGTTCC  
CGAGAAGGCTGTTTCGTTTTTCTTTCATATTATGTCGTCTGTCTGTCCTGG

CAGAGGATGAGGAG-----GAGGAG  
GTTACCATTTTACCCGAGCCAAAGCCAAATTCAGAACTGTCCTGTAAGCC  
TCTTTGCCTGATGTTTGTGGATGAGTCAGACCATGAGACACTCACAGCTG  
TCTTGGGGCCTATAGTTGCAGAGCGTAACGCAATGAAAGAAAGCAGGCTT  
ATCCTATCTATAGGTGGCCTGCCTCGCTCCTTTTCGCTTCCACTTCAGGGG  
CACGGGATATGATGAGAAGATGGTGCCTGAGATGGAGGGGCTGGAGGCCT  
CTGGGTCCACATACATCTGCACTCTATGTGACTCCAGTCGTGCAGAGGCC  
TCTCAAACATGGTGCTGCACTCCATCACCCGCAATCATGAAGAGAACCT  
AGAACGCTATGAAATATGGAGAACCAACCCCTTTTTTGTAGTCCGTAGATG  
AGCTGCGTGACAGAGTCAAAGGGGTGTCTGCAAAGCCCTTCTTGGAGACG  
CAGCCCACGCTAGATGCATTGCACTGTGACATTGGCAATGCTACTGAATT  
CTACAAAATCTTCCAGGACGAGATTGGAGAAGTGTACAAAAGGT---CA  
AC---CCCAGCCGGGAGGAGCGGCGCAGCTGGAGGGCAGCCCTAGATAAA  
CAGCTGAGGAAGAAGCTGAAGCTTAAACCAGTAATGAGGATGAATGGGAA  
CTACGCCCCGAGGCTAATGACCCAGGAGGCTGTGGAGGTGGTGTGTGAGC  
TGGTGCCCTCAGAGGAGAGAAGGGAGGCCCTGAGGGAGCTTATGCGGCTC  
TACCTCAAATGAAGCCTGTGTGGCGTGCCACCTGCCAGCCAAGGAGTG  
CCCTGACCAGCTATGCCGCTACAGTTTTAACTCTCAACACTTTGCTGACC  
TTCTCTCCACTGCCTTCAAATATAGGTACAATGGAAAGATAACCAATTAT  
CTGCACAAGACCCTGGCCCATGTACCTGAAATTATAGAGAGAGATGGATC  
CATAGGAGCCTGGGCCAGCGAAGGGAATGAGTCAGCAAACAAATCTTATA  
CCATCGATATGGGTCCCCTGGGGCCCCGGTGGAAGGAGAACCCACAGCCT  
TTCTCCTGCTCCATTGAGGACCCCCACCAAACAGACTAAATTCAAGGGCAT  
CAAGACCTACATTTTCATACCGGGTGACGCCGAGCCACACAGGGCATCCTG  
TCTACAGACGCTACAAACACTTTGACTGGCTGTACAACCGTTTGCTGCAC  
AAGTTCACTGTGATCTCTGTGCCTCACCTGCCCCGAGAAGCAGGCCACGGG  
GCGATTTGAGGAAGACTTCATTGAGAAGCGCAAGAGGCGACTGATACTGT  
GGATGAACCATATGACCAGTCAACCAGTCCTCTCCAGTATGAAGCCTTT  
GAGCACTTTCTGATGTGTGCCGATGACAAACAGTGAAACTGGGCAAGAG  
ACGGGCAGAAAAGGACGAGATGGTGGGCGCCACTTCATGCTGACCCTCC  
AAATCCCCAACGAGCACCAGGACCTTCAGGATGTTGAAGAGCGTGTAGAC  
AACTTCAAGGCCTTTGCTAGAAAAGATGGACGACAGCGTGATGCAGCTGAC  
ACATGTTGCGTCCGAGCTCGTGCGTAAACACCTGGGTGGATTTCAGGAAGG  
AGTTTCAGCGCCTTGAAATTCCTTCCAGTCTATCAGCCAGGCATTCATG  
TTGGACCCTCCCTATAGGTGAGATGTACTCAACAACGCCATCTCCATNNNNNNNNNCG  
TTCTCAAACCTGACCTCTCTGGGTTTCATCATTGGAGTCGGTGTGGTTGG  
AAACCTCCTGATCTCCATCCTGCTGGTCAAAGACAAGAGCCTGCACCGAG  
CGCCCTACTATTTCTGTTGGACCTGTGCGCCTCTGACATCCTGCGCTCC  
GCCATCTGCTTCCCCTTTGTCTTACCTCAGTCAAGAATGGATCTGCCTG  
GACCTATGGCACGTTGACCTGTAAAGTGATCGCATTCCTGGGTGTGCTCT  
CCTGTTTTACACGGCGTTCATGCTATTCTGCGTCAGCGTCACCCGTTAC  
CTGGCCATTGCGCATCACCGTTTCTACACCAAGAGGCTCACTTTCTGGAC  
GTGTTTGGCTGTGATCTGCATGGTGTGGACGTTGTCTGTGGCTATGGCGT  
TCCCACCGGTGCTAGATGTAGGGACGTA CTCTTTTATCCGGGAGGAGGAC  
CAGTGCACATTCCAGCACCGTTCTTCAGGGCAAATGATTCACTGGGCTT  
CATGCTCCTGCTGGCACTCATCCTCCTGGCCACACAGCTGGTTTACCTCA  
AGCTCATCTTTTTCGTCCACGACCGTCGAAAGATGAAGCCCGTCCAGTTC  
GTGCTGCGGTGACCCAGAACTGGACCTTCCACGGCCCAGGTGCCAGCGG  
GCAGGCGGACGCAACTGGCTGGCTGGATTTGGTAGAGGCCCCACCCCGC  
CTACTTTGCTGGGCATCCGGCAGAACAGCAATGCAGCGGGCCGACGGCGT  
CTACTGGTATTGGATGAATTCAAAACCTGAGAAGAGGATTAGTAGGATGTT  
CTACATCATGACGTTTTTCTTCCCTGGCACTGTGGGGGCCATACCTGGTGC  
CCTGCTACTGGCGGGTGTGTTGCAAAGGGGCCCGTTGTCCCTGGAGGCTAC

CTGACAGCAGCCGTGTGGATGAGCTTTGCCAGGCTGGGGTCAATCCTTT  
CATCTGCATCTTCTCCAACAGAGAGGCCAAATCTCGCTTTCACCCCTGGCG  
TGGGGACTGGGCTTGGCACGGAGC---GCAGCGTCCCACTCGGCAACAGC  
TTGCTATCCCCGCAGCAAACCGAGGAGCCAGTGTGCCACCCCCCGCA  
GCGATGGTTTTGTCACCC---CTGCCAACAACCGACTGGACTTTGCTGCCT  
CGGCATACGACGCCGCT-----GATTTTGCCGGTAACGCGGCCACC  
TTACTGTCCTACGCAGCGGCCGGAGTGAAGGCTC-----TTCCCTGCC  
GACTGCAGGCTGCTCCAACCGGCTCTTGGCTATTACGCAGACCCGTCTG  
---GCTGG---GGAGGACGCACGCCGCCGAGTATTGTGGTGTAAATAGT  
AAATCCAGCTCGGTCTTTTCTGCTGGCCACTAATCCATCGGTGGCAG  
AACAGGCA---CC---AGCTACCTGT-----CCGAGGA---GGGA-  
--GACTC---CATCACGACAGAGAGGTCACCC---AT---CGGCGGCTCG  
GAAGAG---ACCAAACCAAAGACATGAC---ATCTGA---ATCGAGCTG  
GATAGAG---ACGCCGTCCTCCATTAAGTCCATCGATTGAGCGATTCTG  
GTATCTTTG---AACAGGCCAAGCGGAGAAGAATCTCACCTTCTGCAACA  
CCA-----GTTTCAGAGACAGTGTCCCCGTTAAAGTCTGAGCATCA  
CTCAACAGGCGAAGTCACAGAGAGAGAAGTGGCGTTGGGGATAAATCCGT  
TCGCGGATGGGATGGGCGCTTCAAATAAACCACAGCTCCCACGATATT  
GGCTCCGG---ACAGACGGCGTTTTCTCCAGGCT---CCCGGCTAC--  
-GCAGCAGCTGCCTTGGGA---CACCATCA-----CCACCCGACTCACG  
TTGGCTCT---TACTCCACGGCGGCTTTCAACTCCACCAGGGACTTTCTC  
TTCAGAAATCGGGTTTTGGGGACGCCACCGG-----GGCGCA  
GCACAGTCTGTTTCGCTC-----CGGAAGTTT---C-----GCAG  
GGCCACATGGACACTCAGATGCAGCGGGGCACCTGCTCTTCCCAGGGCTC  
CACGAG---CAAGCAGCAAGCCATGCCTCTTCCAACGTGGTCAACAGCCA  
GATGCGGCTGGGCTTCTCGGGGGACATGTACGGACGGGCCGACCAGTATG  
GCCACGTTACAAGCCCAAGGT---CTGACCACTATGCTTCAACCCAGCTG  
CACGGCTATGGCCCCATGAACATGAATATGGCCGCA---CACCATGGAGC  
AGGGCCCTTCTTTGATACATGAGGCAGCCGATCAAACAAGAGCTTATCT  
GCAAGTGGATCGAACCGGAGCAGCTGACGAATCCCAAAAAGTCGTGTAAC  
AAAACTTTTAGCACGATGCACGAGCTTGTGACCCATCTAACGGTGGAGCA  
TGTGGGGGGACCAGAGCAGACCAACCACGTTTGCTTCTGGGAGGACTGCT  
CCAGAGAAGGAAAGCCATTCAAAGCCAAATACAAACTTGTAATCATATC  
AGAGTACACACCGGTGAAAAGCCCTTCCGTGTCCGTTCCCCGGCTGTGG  
CAA

>Paraulopus oblongus

AGTCTTCTTATCCGTGCCGAACCTGAGCCAACCCGGGATCCCTCTGGGTGA  
CGACCAGATTTATAATGTAATTGTTACTGCACACGCTTTCGTAATAATTT  
TTTTTATAGTTATAACCCCTAATAATTGGGGGCTTTGGAAACTGACTAATT  
CCTTTAATGATCGGGGCCCCGACATGGCATTCCCCGAATAAATAATAT  
GAGCTTCTGGCTCCTCCCCCCTCATTCCTTCTTCTTTTAGCCTCTTCTG  
GTGTTGAGGCCGGGGCCGAACCGGGTGAACCTGTCTACCCCTCTTGCT  
GGCAATTTAGCCCATGCCGGAGCCTCTGTAGACCTAACTATTTTTTCATT  
ACATTTGGCTGGTATTTCTTCTATTTAGGGGCTATTAATTTTATTA  
CAATTATCAATATGAAACCCCTGCCATGTACAGTACCAAACACCCTTA  
TTTGTATGAGCAGTCTTATTACGGCTGTGCTGCTTCTTCTCTCTTCC  
CGTCTTAGCAGCAGGGATTACTATGCTCCTCACAGACCGAAACCTCAACA  
CAACCTTTTTTGACCCGGCGGGAGGAGGGACCCCATTTCTTTATCAACAC  
CTCTTCTGGTTCTTCGGCCACCCTGAAGTTTACATCCTTATTCTTCCCGG  
CTTCGGGATAATTTCCACATCGTAGCCTATTACGCCGAAAAAAGAGC  
CTTTTGGTTATATGGGCATGGTCTGAGCTATAATGGCCATCGGACTACTT  
GGTTTTATCGTATGAGCTCACACATGTTTACAGTAGGAATAGACGTTGA  
CACACGGCCTAATTCCTAGAGAGGAACCTTACCCGTCCAATTGCCCTGG

CATGCTGCTACTGTCAGACGCCCACCAGTGCACCAAGCTGTCAGAGCTGT  
CCTGGGGTATGTGCCCTCAGCAACTTCCCTGCCATCTGCAAGACTGAGGAT  
TTCTCCAGCTTCCCAAAGACATGGTGGTGCAGCTTCTGTCCCACGAGGA  
GCTGGAGACGGAAGATGAGAGACTGGTTTACGAGGCTTCCCTTAACTGGG  
TCAACTATGACCTGGAGAGGAGACACTGTCACCTGCCAGAGCTGCTGAGA  
ACCGTGCCTCTGGCCTTGCTTCCCTGCCATCTTCCCTCATGGAGAACGTCTC  
TACAGAGGAGCTGATCAATGCCAGGCCAAGAGCAAGGAGTTGGTGGACG  
AGGCCATCCGGTGCAAGCTGAAGATCCTGCAGAATGACGGTGTGGTGAAC  
AGTCCCTGTGCCCGGCCAGAAAGACCAGCCATGCCCTTTTCCCTGCTGGG  
AGGGCAGACCTTCATGTGTGACAAGCTGTACTTGGTGGACCAGAAGGCCA  
AAGAGATCATCCCCAAGGCTGACATCCCTAGCCCCAGGAAGGAGTTCAGT  
GCCTGTGCCATCGGCTGTAAGGTCTACGTCACAGGGGGAA--GGGGTCTC-  
AGAGAACGGCGTGTCTAAAGACGTGTGGGTCTACGACACCGTCCATGAGG  
AGTGGTCCAAGGCAGCACCCATGCTCATTGCCAGGTTTGGCCATGGCTCT  
GCTGAGCTTAAACACTGCCTCTATGTGGTTGGAGGACACACAGCAGCTAC  
TGGTTGCCTCCCAGCCTCTCCCTCTGGATGAGTACATTGTAGTGTTCAGT  
CGTTCTACAACAAGGCTGATTCTAAATGAAGCTGAGCTGATCCTGGTCCCT  
GGCACAAGAGTTTTCAGATGAGGGTGGTTACAGTGTCCCTGGAGGAACAGT  
CTTTTCCCAGCATCGTCCAGGTGATCAGCAAGGCCCTCCATGTTGGTTAGT  
ATGCATGGAGCTCAACTAGTCACCTCACTTTTTCTCCCTAGAGGAGCTGC  
TGTGGTGGAGCTCTTCCCCTATGCTGTGAACCCAGAACAATACACCCCAT  
ACAAAACCTTAGCCTCCTTACCAGGCATGGATCTTCAATACGCATCCTGG  
AGGAACACTATTGAGGAGAACAACACTGTCACCCACCCAGACAGACCCCTGGGA  
CCAAGGAGGCATTGCCATTTGGAGAAAGAGGAGCAGGAGAGAATCCTAG  
CCAGCACGGACGTCCCAGGCACCTGTGCTGCCGAAACCCAGAGTGGCTC  
TTCAGGATCTACCAGGACACTCTGGTGGACATCCCCCTCCTTCCCTGGAAGC  
TCTCAA---GGAGGGACTGAAG---ATGAGGCCAAGCTTGAAGAA---GT  
CCAAGCCAGCCAGCACAGTTACACCAGGCCGGGTTCGAGATCCCCAATGC  
CAGACATCAGTCCAAGCCACCAATGAAGCTAAGCTTACGGTATCCTGGCA  
GATCCCATGGAATCTTAAGTACCTGAAGGTGCGAGAGGTGAAGTACGA-G  
TGTGGATCCGAAAAGGGATTCAACCAAGGGAACCCCTGGAGGATCAAATA  
ATTCAGGCAAWCCCTGCACTGGAGGCTTTTGGTAATGCCAAAACATTGAG  
GAATGATAATTTCATCCCCTTTTGGAAAATTCATCAGAATTCACTTCGGAA  
CCAGTGGTAAACTGTCTCTGCGGACATTGAGACATACCTGCTGGAGAAG  
TCACGGGTACCTTTCAGCTTAAAGTCCGAGAGGAACCTACCACATCTTCTT  
CCAGATTCTGTCCAATCAAAGCCAGAGCTGTTGGATATGCTGTTGATCA  
CCAACAACCCCTATGACTACTCCTACATCTCCAAGGGGAAGTAACTGTA  
GCATCCATCAATGATTCAGAGGAGCTGATGGCCACTGACAGTGCCTTTGA  
TGTGCTGGGCTTCACTCAAGAGGAGAAGATGGGAGTCTACAAGTTGACGG  
GGGCTATCATGCACTATGGCAACATGAGGTTCAAGCAAAGCAGCGTGAG  
GAGCAGGCTGAGCCTGATGGTACAGAAGCTGCTGATAAGTCAGCTTATCT  
AATGGGGCTGAATTCAGCAGACCTCATCAAAGGACTCTGCCATCCAAGAG  
TCAAGGTAGGAAATGAGTATGTCACATAAAGGCCAGAGTGTAGATCAAGTC  
TACTACCCCAACAAGGAGGCCTTCAAGTGCGAAGAGTGTGGCAAGCACTA  
CAACACCAAGCTGGGGTACAAGCGCCATGTGGCCATGCACTCCGCCACGG  
CGGGGGACCTCACCTGCAAAGTGTGCATGCAGAGTTACGAGAGCACACCC  
GTGCTCCTGGAGCACCTCAAGAGCCACTCGGGGAAGTCCCTCGGGCGGCGC  
CAAGGAGAAGAAGCACCCATGCGACCACTGTGACCGTTCGCTTCTACACGC  
GGAAGGACGTACGGCGGCACATGGTTCGTCACACGGGCGCAAAGGACTTC  
CTGTGCCAATACTGTGCCAGCGCTTCGGCAGGAAGGACCACCTGACACG  
GCACGTGAAAAAGAGCCACTCGCAGGAGCTGCTGAAGATCAAGACGGAGC  
CTCCGGATATGTTGGGTCTCCTGGGCTCCGGATCGCCGCCTTGTCTGGTC  
AAGGAGGAGCTCAGCCCCATGATGTGCAGCATGGGCCCAATAAAGACCC







ACCACGGAGCCGGGGCCTTTTTTCGGTACATGAGGCAGCCGATCAAGCAA  
GAGTCATCTGCAAGTGGATCGAGCCGGAGCAGCTGACGAACCCCAAAA  
GTCGTGCAACAAAACTTTTAGCACCATGCACGAGCTGGTGACCCACCTGA  
CGGTGGAGCACGTCCGGGGTCCCGAGCAGTCCAACCACATCTGCTTCTGG  
GAGGACTGCGCCCCGGAGGGGAAGCCCTTCAAAGCCAAATACAAAACCTGT  
GAATCATATCCGCGTGACACCCGGAGAAAAGCCCTTCCCTTGTCCGTTCC  
CCGGCT-----

>Pempheris scchomburgkii

-----  
-----  
-----  
-----  
-----  
-----  
-----  
-----  
-----  
-----  
-----  
-----  
-----  
-----  
-----  
-----  
-----  
-----  
-----  
-----  
-----  
-----  
-----  
-----

-----TTCCTTGAAAGAAACCTTCACCCATCTAACTGCCTTGG  
CATGCTGTTGCTGTCTGACGCTCACCAGTGCACCAAGCTGTCAGAGCTCT  
CCTGGGGCATGTGCCCTCAGCAACTTTCAGCCATTTGCAAGACCGAGGAC  
TTCCCTCAAACCTGCCCAAAGATATGGTGGTGAACCTTTTGTACACGAAGA  
GCTAGAGACAGAAGACGAGAGACTAGTTTATGAAGCTGCCCTTAACTGGA  
TCAACTATGACCTGGAAAAGAGGCACCTGCCATCTTCCAGAGCTCCTGAGA  
ACAGTGCCTGGCCCTGCTTCCCTGCCATCTTCTCATGGAGAACGTTTC  
TACGGAAGAGCTGATCAATGCCCAGGCCAAGAGCAAGGAGCTGGTGGATG  
AAGCCATCCGCTGTAAGCTGAAGATCCTGCAGAATGATGGTGTGTTAAC  
AGTCCGTGTGCTCGACCAAGAAAACCCAGCCATGCCCTCTTCTCTGGG  
AGGGCAGACTTTCATGTGTGACAAGTTGTACCTGGTGGACCAGAAAGCCA  
AAGAGATCATCCCCAAAGCAGACATTCAGTCCAGGAAGGAGTTCAGC  
GCCTGTGCAATCCGGCTGCAAGGTGTACATCACTGGTGGGA--GAGGCTC-  
AGAGAATGGTGTGTCCAAGATGTGTGGGTCTACGACACGGTCCACGAGG  
AATGGTCAAAGGCTGCACCCATGCTTATTGCCAGGTTTGGCCATGGCTCG  
GCAGAGCTGAAACACTGCCTCTACGTTGTGCGGAGGCCACACCGCAGCAAC  
TGGCTGCCCTCCCGCTTCTCCTTCTGGATGAATACATTGTTGTGTTTCTCAGT  
CGTTCAACAACAAGGCTGATTCTGAATGAAGCTGAGCTAATCATGGCGCT  
GGCCAGGAGTTCCAGATGAGAGTGGTCACGGTGTCCCTGGAAGACCAGT  
CTTTCCCGAGTATCGTCCAGGTGATAAGCGGCGCTCCATGTTGGTTCAGT  
ATGCATGGAGCTCAGCTCATCACCTCACTCTTCCCTCCCCAGAGGAGCCGT  
GGTGGTGGAGCTGTTCCCTTTGTGTGAACCCGGAGCAGTACACCCCAT  
ATAAGACGCTTGCCTCTTCCAGGCATGGATCTTCACTATGTCTCCTGG  
AGGAACACGAAGGAGGAGAACACCGTCAACCCAGACAGACCTTGGGA  
ACAAGGGGGCATTGTTCACTTGGAGAAAGAGGAACAGGAGCGAATACTGG  
CGAGCAAAGATGTCCCAGGCACCTGTGCTGCCGCAATCCAGAGTGGCTC  
TTCCGGATCTACCAGGACACTCTGGTGGACATCCCTTCTTTTGTGGATGT  
CCTCAA--AGAGGGCATGAAG--ACAAAACCTAGCCTGAAAAA--GT  
CGAAGGTTGCCAGCATAGTCCATCCTGGCCGGGTGAGAGAACCTCAGTGT









CAGCTATGGGCATGGGCTGCCACANNNNNNNNNNNNNNNNNNNNNNNNNNNNNNNNNNNNNNNNNNNNNNNNNNNNNNNN  
NNNNNNNNNNNNNNNNNNNNNNNGTGAATCTGCTAGCAAGTAACTCTCC  
AAGTGTTCGTATGCTCTTACCCAGCAGAAATACTTCAGTAACTACAGTC  
CTGTGATTGGGTTTTACATTTATGAGCCAATTGAGTACTGGAACCAACG  
GTGCAGGAGCATCTGAAGACTCTGAGTCATGGCTTCAACAAGATCTCCTG  
GATGGACAACTTTTTCCACTACCTGCGGGTGGTGAATGTGAGTGCATCGA  
CCAAGAGTGAACATTCATCACCATCCTCAAGGGCTCCTCCTGCGCAGCCCG  
GAGTACCAGCACTTCACAGAGGACATCATATTTCTCAAGA---ACCGTGA  
GACCG-----ATGAGTACGACATCATCGCTTCGCGGATGTACCTGGTGG  
CACGAACCACGGAGAAGAAACGCGAGGAGGTGGTGGAGCTTCTGGAGAAG  
CTTCGTCCGTGATGCTGATCAACAGCATCAAGTTCATTGCCTTCAATCC  
TACGTTTGTGTTTCATGGACCGCTACAGCTCCTCCGTCATCTCACCATCC  
TGACCTCAGGCTTCAGCGTACTCACTATTCTCATCCTTACTTTTTCTCCTG  
GTCATCAACCCCTTGGGAACTTCTGNNNNNNNNNNNNNNNNNNNNNNNNNNNNNNNNNNNNNNNNNNNNNNNNNNN  
NNNNNNNNNNNNNNNNNNNNNNNNNNNNNNNNNNNNNNNNNNNNNNNNNNNNNNNTCTTGCAATGTAGGCAT  
TATTAAT  
GGGGTCTCTGGATGGGCTTCTCTGTGCTGACTCCCCAGCTGACACCAT  
CACTCGGCGGTTTTCGCTATGATGTGGCACTGGTGTGAGCAATAAAGGATC  
TGGAGGAGGACATCATGGAGGGCTGAGAGAGAGTGGGATGGAAGACAGC  
GCGTGTCTCTCAGGCTTCAGTGTGATGATCAAGGAATCTTGCGATGGCAT  
GGGCGATGTGAGCAGGAGAAGCACGGTGGAGGACCAGTTGTTCTGAGAAGG  
CTGTACGTTTTCTCTTCACTGTTATGTGAGTCTCTGTCTGAGAGGAT  
GAGGAG-----GAAGCGGTTACCAT  
CTTCACAGAGCCAAAGCCAAACTCAGAGCTGTCTGTAAGCCCTTTGCC  
TAATGTTTGTGGATGAGTCAGACCATGAGACACTCACAGCTGTCTGGGG  
CCTATAGTTGCAGAGCGTAATGCAATGAAAGAGAGCAGACTCATCCTGTC  
CTTGGGCGGACTACCTCGCTCCCTCCGCTTTCACTTCAGAGGCACGGGAT  
ACGATGAGAAGATGGTGCCTGAGATGGAAGCCCTCGAGGCTCAGGGTCT  
TCCACATCTGCACTCTGTGACTCCAGTCCGGCAGAGGCTCTGAAAA  
CATGGTGTCTCACTCAGTACCCGCAATCATGATGAGAACCTAGAGCGTT  
ACGAAATATGGAGAACCAACCCCTTTCTGAGTCTGTAGATGAGCTGCCA  
GACAGAGTCAAAGGGTCTCTGCCAAGCCCTTCATGGAGACCCATCCAC  
CTTAGATGCATTACACTGTGACATTGGCAATGCCACTGAGTTCTACAAA  
TCTTCCAGGATGAGATCGGGGAGGTTTACAAAAGGT---CAAC---CC  
AGCCGGGAGGAGCGGCGCAGCTGGAGGGCAGCCCTAGATAAACAGCTGAG  
GAAGAAGATAAAGCTTAAACCGGTAATGAGGATGAATGGAACTATGCCC  
GCAAGCTAATGACCCAGGAGGCTGTGGAGGTGGTGTGAGCTGGTGGCC  
TCAGAGGAGAGGAGGGAAGCCCTGAGGGAGCTTATGAGGCTTACCTCCA  
GATGAAGCCTGTGTGGCGTGCCACCTGCCCCGCCAAGGAGTGCCCCGACC  
AGCTGTGCCGTACAGTTTTAACTCCAGCACTTCGCTGACCTCCTCTCC  
ACTACCTTCAAATATAGGTACAATGGAAAGATAACCAATTACCTGCACAA  
GACCTTGGCCANNNNNNNNNNNNNNNNNNNNNNNNNNNNNNNNNNNNNNNNNNNNNNNNNNNNNNNN  
NNNNNNNNNNNNNNNTCGTACACCATCGACATGGGCCCTTGGGTCCCCTGTG  
GAAGGAGAGCCACAGCCCTTCTCTGCTCCATCGAAGACCCACGAAAC  
AGACAAAGTTCAAGGGCATCAAGACGTATATTTTCGTACCGGGTCACGCCG  
AGCCACACGGGGCGTCCCGTCTACAGGCGCTACAAACACTTTGACTGGCT  
GTACAACCGCTTACTACACAAGTTCACTGTGATCTCAGTTCCTCACCTGC  
CTGAGAAGCAGGCCACGGGCGGTTTTGAGGAAGACTTCATCGAGAAGCGC  
AAGAGGCGACTGATTTTGTGGATGAACCACATGACCAGTACCCGGTCTCT  
CTCCAGTATGAAGGCTTCGAGCACTTTCTGATGTGCGCTGATGACAAGC  
AGTGGAAGTGGGCAAGAGACGGGCGGAGAAGGACGAGATGGTGGGAGCC  
CATTTTCATGCTGACCTGACGATCCCCAACGAGCACCAGGACCTTCAGGA  
TGTGGAGGARCGGATCGACTCTTTCAAGGCCCTTTGCCAAGAAAATGGATG







TCGTCTCGTTTTGGAAAATTCATTCGAATTCACTTCGGTACAAGCGGCAA  
GCTGTCTGCTGACATCGAGACGTACCTGCTGGAGAAGTCACGTGTCA  
CCTTTCAGCTCAAGGCTGAGAGGAACACCACATCTTCTATCAGATCCTG  
TCCAATCAGAAGCCAGAGCTCCTGGACATGCTGCTGATCACCAACAACCC  
GTACGACTACTCTACATCTCCCAAGGAGAGGTAACGTGTCGCCTCCATCA  
ACGACTCGGAGGAGCTGATGGCCACCGACAGCGCCTTCGATGTGCTCGGC  
TTCACTCCAGACGAGAAGATGGGCGTCTATAAACTGACCGGCGCCATTAT  
GCACTACGGCAACATGAAGTTCAAACAGAAGCAGCGTGAGGAGCAGGGGG  
AGCCGGACGGGACGGAGGCTGCTGATAAATCAGCTTACCTAATGGGGCTG  
AACTCTGCTGACCTCATCAAAGGGCTGTGCCATCCAGAGTCAAGGTAGG  
AAATGAATACGTCACCAAAGGCCAAAGTGTGGATCAAGTCTACTACNNNNNNNNNNNNNNNNNNNNNNNNNN  
NNNNNNNNNNNGGAA  
GCACTACAACACCAAGCTGGGATATAAGCGCCATGTGGCCATGCACTCTG  
CCACGGCAGGGGATCTCACCTGTAAAGTGTGCATGCAGACCTACGAGAGC  
ACACCCGTGCTCTTGGAGCACCTCAAGAGCCACTCCGGGAAGTCTTCGGG  
TGGCACCAGGAGAAAAAACACCCGTGCGACCACTGTGACCGTCTGTTTTCT  
ACACGCGGAAGGATGTGAGACGGCACATGGTGGTCCACACGGGCCGAAAG  
GACTTCTGTGCCAGTACTGTGCCAGCGCTTCGGCAGGAAGGACCATCT  
GACACGGCACGTGAAGAAAAGCCACTCGCAGGAGCTGCTGAAGATCAAGA  
CGGAGCCTCCTGATATGTTAGGTCTTTTAGCGTCGGGGTACCACCCTGC  
TCTGTGAAGGAGGAGCTCAGCCCCATGATGTGCGGCATGGGTCCCAACAA  
AGACCCCATGATGGGCAAACCGTTCGCCAGTGGGGCCCCCTTCGGATGG  
GTATGTACAACCCCCACCAT-----CTCCAGGCCATGTCTAATTCTGGG  
GTGGGTCACCCA-----CACCCGTCCCTGATGCCAGTTCCTTGTCTGC  
AGCTATGGGCATGGGGTGCCACANNNNNNNNNNNNNNNNNNNNNNNNNNNNNNNNNNNNNNNNNNNNNNNN  
NNNNNNNNNNNNNNNNNNNGTGAACCTGCTGGCTAGTAACTCTCCG  
AGTGTTCGTCACGCTCTGACCCAGCAGAAATACTTCAGTAACTACAGTCC  
CGTGATTGGGTTTTACATTTACGAGCCCATCGAGTACTGGAACCTCAACGG  
TGCAGGAGCACCTGAAGACTCTGAGTCATGGATTCAACAAGATCTCCTGG  
ATGGACAACTTTTTCCACTACCTGCGGGTGGTGAATGTGAGTGCCTCAAC  
CAAGAGCGACTTCATCACCATCCTCAAGGGTCCCTCCTGCGCAGCCCGG  
AGTACCAGCACTTCACTGAGGACATCATATTCTCCAAGA--ACCGCGAG  
ACTG-----ATGAGTACGACATTATCGCCTCACGGATGTACTTGGTGGC  
GCGGACGACAGAGAAGAAGCGCGAAGAGGTGGTGGAGCTTCTGGAGAAGC  
TTCGTCCGTTGATGCTGATCAACAGCATCAAGTTCATTGCCTTCAATCCT  
ACGTTTGTGTTTATGACCGCTACAGCTCCTCTGTCTATCTCACCCATCCT  
GACCTCAGGCTTACGCTACTCACAATCCTCATCTCACTTTCTTCTGCTG  
TCATCAACCCCTTGGGAAACTTCTGNNNNNNNNNNNNNNNNNNNNNNNNNNNNNNNNNNNNNNNNNNNNN  
NNNNNNNNNNNNNNNNNNNNNNNNNNNNNNNNNNNNNNNNNNNNNTCTTGCAATGTTGGCATT  
ATTAATG  
GACTCTCTGGATGGGCTTCTCGGTGGATGACTCCCCAGCTGACACCATC  
ACTCGTCCGTTTTCGCTATGATGTGGCACTGGTGTGTCAGCAATAAAGGATCT  
GGAGGAGGACATCATGGAGGGGCTGAGAGAGAGTGGGATGGAAGACAGTA  
CGTGCACCTCAGGCTCAGTGTGATGATCAAGGAATCTTGTGATGGCATG  
GGCGATGTCAGCGAGAAGCACGGTGGAGGACCAGCTGTTTCTGAGAAGGC  
GGTACGTTTCTCTTCACTGTTATGTCTGTCTCTGTCCTGGCAGACGAGG  
AGGAG-----GAAGAGGTTACCATC  
TTCACCGAGCCAAAGCCAAACTCAGAAGTGTCTGTAAAGCCCCTTTGCCT  
GACGTTTGTGGATGAGTCAAGCATGAGACACTCACAGCCGTCTGGAGC  
CTTTAGTTGCAGAGCGTAATGCAATGAAAGAGAGCAGGCTCATCCTATCC  
GTGGGTGGACTACCTCGCTCCTTCCGCTTTCACTTCAGAGGCACGGGATA  
CGATGAAAAGATGGTGCCTGAGATGGAGGGCCTCGAGGCCTCGGGGTCCT  
CCTATATCTGCACTCTTTGTGACTCCAGTCCGGGCAGAAGCCTCTCAAAC

ATGGTGCTACACTCCGTCACCCGCAGTCATGAAGAGAACCTAGAACGTTA  
CGAAATATGGAGAACCAACCCCTTTTCTGAGTCTGTAGATGAGCTGCGAG  
ACAGAGTCAAAGGGGTCTCTGCCAAGCCCTTCATGGAGACCCATCCCACG  
CTGGATGCATTACACTGTGACATTGGCAATGCCACTGAGTTCTACAAAAT  
CTTCCAGGATGAGATCGGGGAAGTGTACCAAAGGT---CAAC---CCCA  
GCCGGGAGGAACGGCGCAGCTGGAGGGCAGCCCTAGATAAACAGCTGAGG  
AAGAAGGTAAAGCTTAAACCGGTAATGAGGATGAA TGGGAACTATGCCCCG  
CAGGCTAATGACCCAGGAGGCTGTGGAGGTGGTGTGCGAGCTGGTGCCCT  
CAGAGGGGAGGAGGGAGGCCCTGAGGGAGCTTATGAGGCTCTACCTCCAG  
ATGAAGCCTGTGTGGCGGCCACCTGCCAGCCAAGGAGTGCCCCGACCA  
GCTGTGCCGCTACAGCTTTAACTCCCAGCGCTTTGCCGACCTCCTCTCCT  
CTACCTTCAAATATAGGTACAATGGAAAGATAACCAATTACCTGCACAAG  
ACCTTGGCCATNNNNNNNNNNNNNNNNNNNNNNNNNNNNNNNNNNNNNNNNNN  
NNNNNNNNNNNNNNNTCGTACACCATCGACATGGGGCCCTTGGGTCCCCGGTG  
GAAGGAGAGCCACAGCCTTTCTCCTGCTCCATTGAAGACCCACAAAAC  
AGACAAAGTTCAAAGGCATCAAGACGTACATTTCTGACCGGGTCACGCCG  
AGCCACACAGGGCATCCCCTTACAGGCGCTACAAACACTTTGACTGGCT  
GTACAACCGCTTACTGCACAAGTTCACTGTGATCTCCGTGCCTCACCTGC  
CTGAGAAGCAGGCCACGGGGCGATTTGAGGAAGACTTCATCGAGAAGCGT  
AAGAGGCGGCTGATACTGTGGATGAACCACATGACCAGTCACCCAGTCCT  
CTCCCAGTATGAAGGCTTTGAGCACTTTCTGATGTGCGCTGATGACAAGC  
AGTGAAACTGGGCAAGAGACGGGCGGAGAAGGACGAGATGGTGGGTGCC  
CATTTTCATGCTGACCCTCCAGATCCCCTAATGAGCACCAGGACCTYCAGGA  
TG TAGAGGAGCGGGTGC ACTCCTTCAAGGCCTTTGCTAAGAAAATGGATG  
ACAGCGTGATGCAGCTCACGCACGTTGCCTCGGAGCTGGTGCCTAAGCAC  
CTGGGTGGGTT CAGGAAGGAGTTCAGCGGCTGGGAAACGCCTTCCAGTC  
TATCAGCCAGGCCCTCATGCTGGACCCTCCCCACAGCTCAGAAACCTTCA  
ACAACGCCATCTCCCATNNNNNNNNNNNNNNNNNNNNNNNNNNNNNNNNNGGTTTCATCATGGGAGTCGG  
TGTGGTCCGAAAC  
CTCCTGATCTCCATCCTGCTGGTCAAAGACAAGAGCCTGCACCGAGCGCC  
CTACTATTTCTGCTGGACCTGTGCGCCTCTGATATTTCTGCGCTCCGCCA  
TCTGCTTCCCCTTTGTCTTACCTCGGTCAAGAATGGTTCTGCTGGACC  
TACGGCACGCTGACCTGCAAAGTGATCGCCTTCTGGGTGTGCTCTCCTG  
TTTCCACACGGCGTTATGCTATTCTGTGTCAGTGTCACTCGCTACCTGG  
CCATCGCACATCACCGTTTCTACACCAAGAGGCTGACCTTCTGGACCTGT  
CTAGCTGT CATCTGCATGGTGTGGACGTTGT CAGTGGCTATGGCGTTCCC  
GCCGGTGCTAGACGTAGGGACATACTCTTTTATCCGGGAGGAGGACCAGT  
GCACATTCAGCACCGTTCTTCCAGGGCGAATGATTGCTGGGCTTCATG  
CTCCTGCTGGCGCTCATCCTCCTGGCCACACAGCTGGTTTACCTCAAGCT  
CATCTTCTTCGTCCACGACCGTTCGAAAGATGAAGCCTGTCCAGTTCGTGC  
CTGCTGTCAGCCAGAACTGGACCTTCCACGGGCCAGGCGCCAGCGGGCAG  
GCGGCGGCCAACTGGCTGGCTGGATTGGTTCGAGGCCCCACCCCGCCTAC  
TTTGTGCGGCATCCGGCAGAACAGCAACGCAGCGGGCCGCAGGCGTCTAC  
TGGTATGGATGAATTCAAAACAGAGAAGAGGATTAGTAGGATGTTCTAC  
ATCATGACGTTTTTCTTCTGGCACTGTGGGGGCCCTATCTGGTTCGCCTG  
CTACTGGCGGGTGT TGGCAAGGGGCCAGTGGTCCCTGGGGGCTATCTGA  
CGGCAGCCGTGTGGATGAGCTTTGCNNNNNNNNNNNNNNNNNNNNNNNNNNNNNNNNNNNNNNNNNN  
NNNNNNNNNNNNNNNNNNNNNNNNNNNNNNNNNNNNNNNNNNNNNGAGC---  
GCAGCGTCCCCTCGGCA  
ACAGCTTGCTATCCCCGCAGCAAACCGAGGAGCCCACTGTTGCCACCCCC  
CCGCAGCGATGGTTTGTACCC---CTGCCAACAACCGACTGGACTTTGC  
TGCTTCGGCATAACGACGCCGCT-----GATTTCCGGGTAACGCGG  
CCACCTTGCTGTCTTACGCAGCGGCCGGAGTGAAGGCTC-----TTCCC



AGGCTATCCGCTGTAAGCTGAAGATCCTGCAGAATGACGGCGTTGTTAAC  
AGCCCGTGTGCTCGACCAAGAAAAACCAGCCATGCTCTCTTTCTCCTGGG  
AGGGCAGACTTTCATGTGTGACAAGTTGTACCTGGTGGACCAGAAGGCCA  
AAGAGATCATCCCAAAGGCGGACATTTCCAGCCCAAGGAAGGAATTCAGC  
GCCTGTGCCATTGGCTGTAAGGTGTACATCACAGGTGGGA--GAGGCTC-  
AGAGAATGGCGTGTCCAAAGATGTATGGGTCTATGACACCGTCCATGAGG  
AATGGTCCAAAGCGGCACCCATGCTGATTGCGAGGTTTGGTCATGGCTCC  
GCAGAGCTGAAACACTGCCTGTACGTGGTAGGAGGTCACACCGCAGCAAC  
TGGCTGCCTCCCTGCTTCTCCATCCGGATGAATACATMGTCGTGTTTCA  
CGTTCAACAACAAGGCTGATACTGAACGAAGCCGAGCTAATCATGGCGCT  
GGCCAGGAGTTCCAGATGAGAGTGGTCACAGTTTCCCTTGAGGAGCAAT  
CTTTCCCCAGCATTGTCCAGGTGATCAGCGGCGCTTCCATGTTAGTCAGC  
ATGCATGGAGCTCAGCTTATCACCTCACTCTTCCCTCCCCAGAGGAGCTGC  
TGTGGTGGAGCTGTTCCCCTTTGCTGTGAACTCAGAGCAGTACACCCCAT  
ATAAAAACCCTTGCCCTCCCTTCCAGGCATGGACCTTCATTATGTTTCCCTGG  
AGGAACACTCTGGAGGAGAACACCGTCACCCATCCAGAYAGACCCCTGGGA  
ACAAGGAGGCATCGCTCACTTGGAGAAGGAGGAGCAGGAGCGAATACTGA  
CCAGCAAAGACGTCCCCAGGCACCTGTGCTGCCGCAACCCGGAGTGGCTC  
TTCCGAATCTACCAGGACACTTTGGTAGACATCCCTTCCCTTTCTGGAAGT  
CCTCAA---GGAGGGAATGAAG---ACCAAGCCAAGCTTGAAGAA---GT  
CCAAACCAGCCAGTACAGTCCATCCGGGCCGGGTCAGAGAAGCCAGTGT  
CAGACCTCAGTACAAACCACCAATGAGGCTAAACTCACAGTCTCCTGGCA  
GATCCCGTGGAATCTGAAATACCTGAAAGTAAGAGAGGTGAAGTACGAGG  
TGTGGATCCAGAAAAGAGACACCAGCAAGGGAACCTCTGGAGGATCAAATC  
ATCCAGGCAAACCCGGCGCTGGAGGCCTTCGAAATGCCAAAACGCTGAG  
AAACGACAATTCGTCCTCGTTTTTGGAAAGTTCATCCGAATTCACTTTGGAA  
ACAGTGGCAAGCTGTCTCGTCCGCTGACGTTGAGACGTACCTGCTGGAGAAG  
TCTCGTGTACCTTTCAGCTCAAGGCTGAAAGGAACATCACATCTTCTA  
CCAGATCCTGTCCAATCAGAAGCCAGAGCTGCTGGACATGCTATTAATCA  
CCAACAACCCGTACGACTACTCCTACATCTCCCAAGGAGAGGTAACGGTC  
GCCTCCATCAATGACTCAGAGGAGCTGATGGCCACCGACAGTGCCTTTGA  
TGTGCTCGGCTTCACTCCAGAGGAGAAGATGGGCGTCTACAAGCTGACCG  
GTGCTATCATGCACCACGGCAACATGAAGTTCAAGCAGAAGCAGCGTGAG  
GAGCAGGCTGAGCCTGATGGGACAGAGGCTGCTGATAAATCAGCTTACTT  
GATGGGGCTGAACTCTGCTGACCTCATCAAAGGGCTGTGCCATCCAGAG  
TCAAAGGTAGGAAATGAGTATGTTACCAAAGGCCAGAGTGTGGACCAAGTC  
TACTACNNNNNNNNNNNNNNNNNNNNNNNNNNNNNNNNNGGAAGCACTACAACACCAAGCTGGGATATA  
AGCGCCATGTGGCC  
ATGCACTCTGCCACGGCGGGGACCTCACCTGTAAAGTGTGCATGCAGAG  
CTACGAGAGCACGCCGTTCTCCTGGAGCACCTCAAGAGCCACTCGGGGA  
AGTCCTCGGGTGGAGCCAAGGAGAAGAAGCACCCGTGCGACCACTGCGAC  
CGCCGTTTCTACACGCGGAAGGATGTGAGACGGCACATGGTGGTCCACAC  
GGGCCGAAAGGACTTCCGTGTGCCAGTACTGCGCCCAGCGCTTCGGCAGGA  
AGGACCACCTGACCCGCCACGTGAAGAAGAGCCACTCGCAGGAGCTGCTG  
AAGATCAAGACGGAGCCTCCTGATATGTTAGGTCTTTTAGCTTCAGGGTC  
GCCGCTTGCTCTGTGAAGGAGGAGCTCAGCCCCATGATGTGCGGCATGG  
GTCCAACAAGACCCCATGATGGGCAAACCGTTCCCCAGCGGCGCCCCG  
TTTCCGATGGGCATGTACAACCCCCACCAC-----CTTCAGGCCATGTC  
GAATTCGGGGTGGGTCACCCG-----CACCCGTCCCTGATGCCAGCT  
CCCTGTCTGCAGCTATGGGCATGGNNNNNNNNNNNNNNNTATCTCATCTACGCCTCTTTTTCTTT  
CATGGGATGTTTACAAATCAGTGATGGATCAAACATTTGTGAACCTGCTGG  
CTAGTAACTCTCCAAGTGTTCGTACGCTCTGACCCAGCAGAAATACTTC  
AGCAACTACAGTCCCGTGATTGGGTTTTACATTTACGAGCCATTGAGTA

CTGGAACTCCACAGTGCAGGAGCACCTGAGGACTCTGAGTCACGGCTTCA  
ACAAGATCTCCTGGATGGACAACCTTTTTCCACTACCTGCGGGTGGTGAAT  
GTGAGTGCCTCAACCAAGAGTGACTTCATAACCATCCTCAAGGGCTCCTT  
CCTGCGCAGCCCAGAGTACCAGCACTTCACTGAGGACATCATATTCCTCA  
AGA---ACCGTGAGACTG-----ATGAGTACGACATTATCGCCTCACGC  
ATGTATTTGGTGGCACGGACCACAGAGAAGAAGCGCGAGGAGGTGGTGG  
GCTTCTGGAGAAGCTTCGCCRTTGATGCTGATCAACAGCATCAAGTTCA  
TTGCCCTCAATCCCAGTTTTGTGTTTCATGGACCGCTACAGTTCTCCGTC  
ATCTCGCCCATCCTTACCTCAGGCTTCAGCGTGCTTACCATCCTCATCCT  
CACTTCTTCTCCTGGTCATCAACCTTTGGGGAACCTTCTGGCTCATCCTGA  
CAGTTACGTCCGTGGAGCTGGGTGTCCTGGGTTTGATGGGCTTTCACCAG  
TTTGAGTGGCAGCCAGCTCTCAAGAATGTGTCTGCATCTTGGAATGTTGG  
CATTATTAATGGGCTCTCTGGATGGACTTCCTCAGTGGATGATTCCCCAG  
CTGACACCATCACTCGGCGGTTTTCGCTATGATGTGGCACTAGTGTGAGCA  
TTAAAGGATCTGGAGGAGGACATCATGGAGGGGCTGAGAGAGAGTGGGAT  
GGAAGACAGTGCTTGCACCTCAGGCTTCAGTGTTATGATCAAGGAATCTT  
GTGATGGCATGGGCGATGTCAGCGAAAAGCACGGTGGAGGACCAGTTATT  
CCTGAGAAAGCTGTACGTTTTCTCTATCACTATTATGTCTGTCTCTGTCT  
GGCAGATGATGAGGAG-----GAGG  
CGGTTACTATCTTACAGAGCCAAAACCAAACCTCAGAACTGTCTGTAAAG  
CCCATCTGCCTGATGTTTGTGGATGAATCAGACCATGAGACACTTACCGC  
TCTCCTGGGGCCTGTAGTTGCAGAGCGTAATGCAATGAAAGAGAGCAGGC  
TCATCCTTTCTATCGGCGGCCTGCCTCGCTCCTTCCGCTTCCACTTCAGA  
GGCACGGGATACGATGAGAAGATGGTGCAGAGATGGAGGGTCTGGAGGT  
TTCAGGGTCCAGCTATGTCTGCACTCTGTGTGATTCCAGTCGGGCAGACG  
CATCTCAAAACATGGTGCTTACGCCATCACCCGCAGCCATGAAGAGAAC  
CTTGAACGTTACGAAATATGGAGAACCAACCCCTTTCCGAGTCTGGAGA  
AGAACTGCGGGACAGAGTCAAAGGGGTCTCTGCCAAGCCCTTCATGGAGA  
CCCAGCCAACGCTGGATGCATTACACTGTGACATTGGCAATGCCACTGAG  
TTCTACAAAATCTTCCAGGATGAAATTTGGAGAGGTGTACAAAAGGCC---  
CAAT---CCCAGCCGGGAGGAACGGCGCAGCTGGAGGGCAGCCTTAGATA  
AACAGCTGCGGAAGAAGTTGAAGCTTAAACCGGTAATGAGGATGAATGGG  
AACTATGCCCCGAGGCTAATGACCCAGGAGGCTGTGGAGGTGGTGTGTA  
GCTGGTGGCCTCAGAGGAAAGGAGGGCCCTGAGGGAGCTTATGAGGC  
TATATATCCAGATGAAGCCTGTGTGGCGCTCCACCTGCCAGCCAAGGAG  
TGCCCTGACCAGTTGTGTGCTATAGCTTTAACTCCAGAGCTTTGCTGA  
CCTCCTCTCCTCTACCTTCAAATATAGGTACAATGGAAAGATAACCAATT  
ACCTGCACAAGACCCTGGCCCATGTCCCTGAAATCATTGAAAGAGATGGA  
TCCATTGGAGCCTGGGCCAGTGAGGGGAATGAGTCAGCAAACAAATCATA  
CACCATCGATATGGGTCCCCTGGGGCCCCTGTGGAAGGAGAGCCACAGC  
CTTTCTCCTGCTCTATTGAAGACCCACAAAACAGACAAAGTTCAAAGGC  
ATCAAGACGTACATTTTCGTACCGGGTCACTCCGAGCCACACAGGGCATCC  
TGTCTACAGGCGCTACAAACACTTTGACTGGCTGTACAACCGCCTGCTGC  
ACAAGTTCACTGTGATCTCCGTGCCTCACCTGCCTGAGAAGCAGGCCACG  
GGGCGATTTGAGGAAGACTTTATTGAGAAGCGGAARAGACGACTGATACT  
GTGGATGAACCACATGACCAGTCACCCTGTCTCTCYCAGTATGAAGGCT  
TTGAGCACTTCTGATGTGTGCTGACGACAAGCAGTGGAAAGCTGGGCAAG  
AGACGAGCTGAGAAGGACGAGATGGTGGGCGCCATTTTCATGCTGACCCT  
CCAGATCCCTARCGAGCACCAGGACCTTCAGGATGTAGAGGAGAGAGTTG  
ACACCTTCAAGGCCTTTGCTAAGAAAATGGAYGACAGCGTCATGCAGCTC  
ACACATGTTGCCTCGGAGCTGGTGCGAAAGCACCTGGGTGGATTCAGGAA  
GGAGTTCAGCGGCTGGGAAATGCCTTCCAGTCTATTAGCCAGGCATTCA  
TGCTGGACCCTCCCATAGCTCAGATGCCCTCAACAATGCCATCTCCCAT

NNNNNNNNNNCGTTCCTCAAACCTGACCTCTCTGGGTTTCATCATTTGGAGTTGGTGTGGTT  
GGAAACCTCCTGATCTCCATCCTGCTGGTCAAAGACAAGAGCCTGCACCG  
AGCACCTACTATTTTCTGCTGGACCTGTGTGCCTCCGATATCCTTCGCT  
CTGCCATCTGCTTCCCCTTTGTCTTCACCTCGGTCAAGAATGGATCAGCC  
TGGACCTATGGCACACTGACCTGCAAAGTGATCGCCTTCCTGGGTGTGCT  
CTCCTGTTTCCACACAGCGTTCATGCTATTCTGCGTGAGCGTCACCCGCT  
ACCTGGCCATCGCACATCACCGTTTCTACACCAAGAGGCTGACTTTCTGG  
ACCTGTCTGGCTGTCATCTGCATGGTGTGGACGTTGTCAGTGGCTATGGC  
GTTCCCGCCGGTACTAGACGTAGGGACGTATTCTTTTATCCGGGAGGAGG  
ACCAGTGCACATTCCAGCACCGCTCCTTCAGGGCGAATGATTCGCTGGGC  
TTCATGCTCCTGCTGGCGCTCATTTCTCCTGGCCACACAGCTGGTTTACCT  
CAAGCTCATCTTCTTCGTCCATGACCGTCGAAAGATGAAGCCTGTCCAGT  
TCGTGCCTGCTGTCAGCCAGAACTGGACCTTCCACGGGCCAGGTGCCAGC  
GGGCAGGCGGGCCAACTGGCTGGCCGGATTTGGTAGAGGCCCCACCCC  
GCCTACTTTGCTGGGTATCCGGCAGAACAGCAACGCAGCGGGCCGCAGGC  
GTCTACTGGTATTGGATGAATTCAAAACAGAGAAGAGGATTAGTAGGATG  
TTCTACATCATGACGTTTTTCTTCCCTGGCACTGTGGGGGCCCTATCTGGT  
AGCCTGCTACTGGCGGGTGTGTTGCAAGGGGCCCTGTAGTCCCTGGGGGCT  
ACCTGACGGCAGCCGTGTGGATGAGCTTTGCCAGGCTGGGGTCAATCCT  
TTCATCTGCATCTTCTCCAACAGGGAGNNNNNNNCTCGTTTTACCCCTGGCGTGGGG  
ACTGGTCCTGGCACGGAGC---GCAGCGTCCCACTCGGCAACAGCTTGCT  
ATCCCCGCAGCAAAACGAGGAGCCACTGTTGCCACCCCCCGCAGCGAT  
GGTTTGTACCC---CTGCCAACACCGACTGGACTTTGCTGCCCTCGGCA  
TACGACGCCGCT-----GATTCGCCCGGTAACGCGGCCACCTTGCT  
GTCCCTACGCAGCGGCCGGAGTGAAAGCTC-----TCCCTTGCCGACTG  
CAGGCTGCTCCAACCGCCTCTTGGCTATTACGCAGACCCGTCAG---GC  
TGG---GGAGGACGCACGCCGCCGCAATACTGTGGCGTAAATAGCAAACC  
CAGCTCGGTCTTTTCTGCTGGCCCGCTAACTCTATCGGCGGCAGAGCAG  
GCA---CC---AACTACCTGG-----TCGAGGA---GGGA---GAC  
TC---CATAGCGACGGAGAGGTCACCC---AT---C---GGCTCTGAGGA  
G---ACCAAACCCAAAGACATGAC---ATCAGA---GTCAAACCTGGATAG  
AG---ACGCCGTCTCCATTAAATCCATTGATTCAAGCGATTCTGGTATC  
TTTG---AACAGGCAAAGAGGAGAAGAATCTCCCCCTTCTGCCACGCCG--  
-----GTTTCAGAGACAGTGTCCCCGTTAAAACTCTGAGNNNNNNNNNACAGGCGAAG  
TCACAGAGAGAGAAGTGGCGTTGGGGATCAATCCGTTTCGCGGATGGGATG  
GGCGCCTTCAAATAAACCACAGCTCCCACGATATTGGCTCCGG---ACA  
AACGGCGTTTTCTCCCAGGCA---CCCGGCTAC---GCAGCAGCCGCC  
TGGGA---CACCACCA-----CCACCCGACCCACGTTGGCTCT---TAC  
TCCACGGCGGCTTTCAACTCCACCAGGGACTTTCTCTTCAGAAATCGGGG  
TTTCGGGGACGCCACCGG-----CGCGCAGCACAGTTTGTTCG  
CCTC-----CGGAAGTTT---C-----GCAGGGCCACATGGACAC  
TCAGATGCAGCAGGGCACCTGCTCTTCCCAGGGCTCCACGAG---CAAGC  
GGCGAGCCATGCATCTTCCAACGTGGTCAACAGCCAGATGCGGCTGGGCT  
TCTCGGGGGACATGTACGGACGGGCCGACCAGTACGGCCACGTTACGAGC  
CCGCGGT---CAGACCACTATGCTTCGACCCAATTGCACGGCTATGGCCC  
CATGAACATGAATATGGCCGCA---CACCACGGAGCAGGGGCCTTCTTTC  
GATACATGAGGCAGCCGATCAAACAAGAGCTCATCTGCAAGTGGGTGCGAG  
CCGGAGCAGCTGACGAATCCCAAAAAGTCGTGCAACAAAACCTTTTAGCAC  
GATGCACGAGCTAGTGACCCATCTGACGGTGGAGCATGTGGGGGGACCAG  
AGCAGACSAACCATACTGCTTCTGGGAAGAGTGCTCCAGAGAAGGAAAG  
CCATTCAAAGCCAAAATACAACTTGTAATCATATCAGAGTACACACCCGG  
AGAAAAGCCCTTTCCGTGTCCGTTCCCCGGCTGTGGCAA  
>Percopsis omiscomaycus

AGCCTGCTGATTTCGGGCCGAATTAAGTCAACCCGGGGCCCTTCTTGGGGA  
CGACCAAATTTACAATGTAATCGTCACAGCACACGCTTTCGTAATAATCT  
TCTTCATGGTGATACCTATCATAATTGGGGGCTTCGGCAACTGATTAATC  
CCCCAATAATTGGCGCCCCGACATGGCCTTCCCGGAATAAATAACAT  
AAGCTTCTGGCTTCTCCCTCCCTCCTTCCTTCTCCTGCTTGCCTCCTCAG  
GCGTAGAGGCGGGAGCGGGCACGGGGTGGACCGTTACCCGCCCTGGCG  
GGTAACCTTGCCACGCAGGGGCTCCGTCGACCTCACAATTTTCTCCCT  
GCACCTTGACAGGTGCCTCTTCTATCCTCGGGGCTGTAAATTTTATTACAA  
CAATTATTAACATAAAAACCACCTGCGATCTCTCAGTACCAGACACCCCTG  
TTTGTCTGATCCGTGCTCATTACCGCCGTAAGTCTGCTGCTTTTATCCCTCC  
AGTTCTCGCAGCCGAATTACAATGCTGCTACTGACCGAAACCTGAATA  
CAACCTTCTTTGACCCTGCAGGGGGAGGAGACCCAATTCTTTATCAACAC  
CTT-----  
-----  
-----  
-----

-----TTCTGGAGAGGAACCTGCACCCGTCCAACCTGCCTGGG  
CATGCTGCTGCTGTCGGACGCCACCAGTGCGCCAAGCTGTGGAGCTCT  
CCTGGAGCATGTGCCCTCAGCAACTTCCCGCCATCTGCAAGACGGAGGAC  
TTCTCCAGCTGCCAGGGACATGGCGGTGCAGCTGCTGTCCACGAGGA  
GCTGGAGACGGAGGACGAGAGGTTGGTCTACGAGGCGGCCCTCGGCTGGG  
TCAACTACGACCTGGAGGGGAGGCACAGCCACCTGCCGGAGCTGCTGAGG  
ACGGTGCCTCGCCCTCCTTCCCGCCATCTTTCTGATGGAGAACGTCTC  
CACGGAGGAGCTGATCAACTCCAGGCCAAGAGCAAGGAGCTGGTGGACG  
AGGCCATCCGCTGCAAGCTGAAGATCTTGCAGAACGACGGCGTGGTCAAC  
AGCCCCTGCGCCCGGCCGCGGAAGACCAGCCACGCCCTCTTCTGCTGGG  
CGGGCAGACCTTCATGTGTGACAAGCTGTACCTGGTGGACCAGAAGGCCA  
AGGAGATCATCCCCAAGGCGGACATCCCAGTCCCAGGAAGGAGTTCAGC  
GCGTGCGCCATCGGCTGTAAGGTTTACATCACCGGCGGGA--GAGGCTC-  
GGAGAACGGGGTGTCCAAGACGTGTGGGTGTACGACACCGTGCACGAGG  
AATGGTCCAAGGCGGCCCATGCTCATCGCCAGGTTTCGGCCACGGTTCR  
GCCGAGCTGAAACACTGCCTCTACGTGGTGGGAGGTCACACGGCGGCGAC  
GGGCTGCCCTCCCCGCTCGCCCTCCGGATGAATAACATTGTAGTGTTCAGT  
CGGTCAACAACAAGACTGATTCTGAATGAAGCGGAGCTGATTATGGCACT  
TGCACAAGAGTTCAGATGAGAGTGGTCACTATCTCCCTGGAGGAACAGC  
CTTTTGCCAGTATCGTGCAGGTGATCAGTGGAGCCAACATGTTGGTAAGC  
ATGCATGGAGCTCAGCTTGTGCCTCACTGTTCTTGGCCAGAGGTGCCGC  
CGTGGTGGAGCTGTTCCCTTATGCTGTGAACCCAGAGCAGTACACTCCAT  
ATAGAACTCTGGCCTCCCTACCAGGCATGGACCTTCAGTATGTTTCATGG  
AGGAACACTATGGAGGAGAACACTGTCACCCACCCAGACAGACCTTGGGA  
CCAAGGAGGCATTGCCCACTTGGAAAAGGAAGAACAAGAGCGAATACTGG  
CCAGTAAGGATGTCCCAGGCATTTGTGCTGCCGCAACCCAGAGTGGCTT  
TTCCGAATCTATCAGGACACTTTGGTAGACATCCCTTCAATCCTGGAGGT  
CCTGAA---AGAGGGCCTGAAG---ACGAGGCCTAGCTTAAAGAA---AA  
CCAGGCCGGCCAGCACAGTTCATCCTGGACGCGTCAGGGAAGCCAGTGT  
CAGACGTCGGTCCAAGCCGCAATGAGGCTAAACTCACAGTCTCCTGGCA  
GATCCCATGGAATCTCAAATACCTGAAGGTAAGAGAAGTGAAGTACGAGG  
TGTGGATCCAGAAGAAGGACACCAGCAAGGGAACCTTTGAGGATCAAATC  
ATCCAGGCCAACCCGGCACTGGAGGCATTTGGCAACGCCAAGACCACCAG  
GAACGACAACCTTCCCGCTTCGGAAAATTCATCCGGATTCACTTCGGAA  
CAAGCGGGAAGCTGGCGTCTGCCGACATTGAAACATACCTTCTGGAAAAG  
TCCCGGGTATCCTTTTTCAGCTCAAGGCTGAGAGGAATTACCATATCTTCTT  
CCAGATTCTGTCCAATCAGAAGCCAGAGCTGCTGGACATGCTGCTGATCA



CCAACAACCCGTACGACTACTCCTACATCTCCCAGGGAGAAGTGACCGTC  
TCCTCTATCAACGACTCCGAGGAGCTAATGGCCACAGACAGTGCCTTTGA  
CGTGCTTGGATTCACTCCTGAGGAGAAGATGGGCGTGTACAAGCTAATAG  
GAGCCATCATGCATTACGGCAACATGAAGTTTAAACAGAAACAGCGTGAG  
GAGCAGGCAGAGCCAGACGGAACCGAAGCAGCTGATAAGTCAGCATACT  
GATGGGTCTAAACTCTGCTGACCTCATCAAAGGACTGTGCCATCCCAGGG  
TCAAGGTAGGAAATGAGTATGTCACCAAAGGACAAGGTGTAGACCAAGTC  
TACTACNCCAACAAGGAGGCCTTCAAGTGCGAAGAGTGTGGCAAGCACTAC  
AATACCAAGCTCGGATACAAGCGTCAATGTGGCCATGCACTCCGCCACGGC  
AGGGGATCTCACCTGTAAAGTGTGCATGCAGAGCTATGAGAGCACCCCA  
TACTCCTGGAACACCTCAAGAGCCACTCTGGGAAGTCGTCAGGTGGCGCC  
AAGGAGAAGAAGCACCCGTGCGACCACTGTGACCGTCGCTTCTACACCCG  
CAAGGACGTCAGGCGGCACATGGTGGTTCACACTGGCCGAAAGGACTTCT  
TGTGCCAGTACTGCGCCAGCGCTTCGGCAGGAAGGACCACCTGACTCGT  
CACGTCAAGAAAAGCCACTCGCAGGAAGTGTGAAGATCAAGACAGAGCC  
TCCGGACATGCTTGGGCTTCTGGGTTCAAGGCTCGCCGCCTTGCTCCGTCA  
AGGAGGAGCTAAGCCCCATGATGTGCAGCATGGCTCCCAATAAAGACCCA  
ATGATGGGCAAACCCCTCCCCAGTGGGACCCCTTCCCCATGGGCATGTA  
CAACCCACCAC-----CTCCAGGCCATATCCAATTCTGGTGTGGCTC  
ACCT-----  
CACCCCTCTCTGATGTCCNNNNNNNNNNNNNNNNNNNNNNNNNNNNNNNNNNNNNNNNNNNNNNNTATCTCATCT  
ATGCTTCCTC  
TCCTTCATGGGATGTTTACAAATCAGCGACGGATCGAACATTGTCAATTT  
GCTGGCCAGTAACTCTCCAAGTGTTCCTACGCTCTGACCCAGCAGAAGT  
ACTTCAGCAACTACAGTCCGGTGATCGGGTTCTACATTTACGAACCCATC  
GAGTACTGGAACTCCACAGTGCAGGAGCACCTGAAGACGCTGAGCCACGG  
CTTCAACAAGATCTCCTGGATGGACAACTTTTTCCACTACCTGCGGGTGG  
TGAACGCGAGTGCCTCGACGAAGAACGACTTCATTAACATACTCAAGGGC  
TCTTTCTTGCGCAGTCCGGAGTACCAGCACTTCACAGAGGACATAATCTT  
CTCCAAGA---ACCGCGAAAACA-----ACGAGTACGACATAATTGCCT  
CGCGGATGTATCTGGTAGCGCGCACACAGAGAAGAAACGTGAGGAGGTG  
GTGGAACCTTCTGGAAAAGCTGCGTCCGCTAATGCTGATCAACAGCATCAA  
ATTCATTGCCTTCAACCCCACTTTTGTGTTTCATGGACCGTTACAGCTCAT  
CGGTAATCTCGCCATACTGACTTCAGGCTTTAGCGTGTAAACCATCCTC  
ATCCTTACCTTCTCCTGGTTCATCAACCCCTTGGGGAATTTCTGGCTCAT  
TTTGACAGTCACTTCTGTGGAGTTGGGGTTCTGGGTTTGATGGGCCACC  
ACCCGTTTCGAGTGGCAGCCCGCGCTGAAGAGTGTGTCCGCCTCCTGCCAC  
GTGGGCATCATCAACGGACTCTCTGGGTGGGCTGCTTCCGTGGACGACTT  
CCCCATCGAGACCATCACCCGCCGGTTCGGCTACGACGTGGCCCTGGTGT  
CGGCCTGAAGGACCTCGAGGAGGACATCCTGGAGGGTTTGACGGAGCAC  
GGGCTGGACGACAGCGCTTGCGGCGCGGGCTTACCCTGGTGATAAAGGA  
GTCTGTGACGGCATGGGAGATGTGAGCGAGAAGCACGGAGGGGGTCCAG  
CCATCCGGGAGAAGGCCGTGCGATTCTCCTTACCATCATGTCCGGTGTCT  
GTGCTGCCGGAGGGAGAGGAC-----  
-GAGGCGGTACCGTCTTCAGGGAGCCCAAACCGAACTCGGAACTGTCTC  
GTAAGCCCCTGTGCTGATGTTTCGTGAATGAGTCCAACCACGAGATGCTC  
ACCGCCGTCTGGACCTCTGCTCGCCGAGAGGAGCGCCATGAAACAGAG  
CCGGCTCATCTGTCCATAGGTGGCTGCCTCGGTCCTTCCGCTTCCACT  
TCAGGGGGACCGGCTACGATGAGAAGATGGTGCCTGAGATGGAGGGCCTG  
GAGGCTCTGGTTCACCTACGTGTGCACCCTGTGCGACTCCACCAGAGC  
GGAGGCTCCCAGAACATGGTGTCTCACTCCGTCACCCGCAGCCACCAG  
AGAATCTGGAGCGCTATGAAATCTGGAGGACCAATCCCTTCTCGGAGTCT  
GCGGAGGAGCTGCGGGACCGGTGAAAGGGGTCTCCGCCAAGCCATTCAT





-----  
-----  
-----  
-----  
-----  
-----  
-----  
-----  
-----  
-----  
-----  
-----  
-----  
-----  
-----  
-----  
-----  
-----  
-----  
-----  
-----  
-----

-----AAGAAGGATGCCAGCAAGGGGACCTT  
GGAGGATCAAATCATTCAAGCTAACCAGCACTGGAGGCTTTTGGAATG  
CCAAAACAGCGAGAAATGATAACTCCTCACGCTTGGGAAGTTCATTCGT  
ATTCATTTTGAACGAGCGGCAAACCTCTCCTCTGCTGACATAGAACTTA  
CTTGCTTGAGAAATCCCGTGTGACCTTTCAGCTCAAATCGGAGAGGAACT  
ACCACATCTTCTTCAGATATTGTCCAATGAAAAGCCAGAGCTGCTGGAC  
ATGCTGTTGATTACCAACAACCCTTATGATTATTGCTTCATCTCCCAAGG  
AGAAGTAACAGTTAAATCTATCAATGACAGTGAGGAGTTGCTTGCCACTG  
ACAGTGCCTTTGATGTGCTTGGCTTCACTCCAGAGGAGAAGATGGGGATC  
TATAAGTTGACAGGTGCCATTATGCACTATGGCAACATGAAGTTCAAGCA  
GAAGCAGCGTGAGGAGCAGGCAGAGCCTGATGGCACTGAGGCAGCTGACA  
AGTCAGCCTACCTGATGGGGCTTAACCTCTGCTGATCTTGTGAAAGGACTC  
TGCCATCCCAGGGTCAAAGTCGGCAATGAGTATGTAACAAAGGGACAAGG  
TGTAAGTCAAGTCTATTACCCCAACAAGGAGGCCCTTCAAGTGCAGGAGT  
GCGGCAAGCACTACAACACCAAGCTGGGCTACAAGCGGCACGTGGCCATG  
CACTCGGCCACGGCGGGGACCTCACCTGCAAGGTGTGCCTGCAGAGTTA  
CGAGAGCACGCCGGCGCTGCTGGAGCACCTGAAGAGCCACTCGGGCAAGT  
CGTCGGGCGGCACAAGGAGAAGAAGCACCCGTGCGACCACTGCGACCGC  
CGCTTCTACACGCGCAAGGACGTGCGGCGCCACATGGTGGTGCACACGGG  
CCGCAAGGACTTCCTGTGCCAGTACTGCGCGCAGCGCTTCGGCCGCAAGG  
ACCACCTGACGCGCCACGTCAAGAAGAGCCACTCGCAGGAGCTGCTGAAG  
ATCAAGACGGAGCCCCCGGACATGCTGGGTCTGCTGGGCTCGGGCTCGTC  
GCCCTGCGCCATCAAGGAGGAGCTCAGCCCATGATGTGCAGCATGGGCC  
CCGGCAAGGACCCCATGATGGCCAAGCCCTTCCCAGCGGCACCCCTTC  
CCCATGGGCATGTACAACCCCAACCAC-----CTCCAGGCCATGTCCAA  
CCCCGGAGTGGGCCAC-----CACCCTCCCTGGTGCCCGCTCCC  
TGTCGGCCGCATGGGGATGGGCTGCCACATGGAGTACCTGATTTACGCT  
TCCTTCTCCTTCATGGGATGTTTACAAATCAGCGACGGATCCAACATAGT  
CAACCTTTTGGCCAGCGACTCGCCGAGCGTGTGCTACGCTCTGACCCAGC  
AGAAGTATTTTACAACTACAGCCCAGTGATAGGGTTCTACATCTATGAG  
CCCATTGACTACTGGAACGCCACTGTGCAAGGAGCACCTCAAGACACTGGG  
CCAGGGCTTCAATACGATATCGTGGATCGATAATTACTTTCAGTATCTGA  
AGGTGACGAACGTCAGCGCTGACCCAAAAGCGACTTCATTGCCGTCCTC  
AAGACCTCGTTCTGAGGAGTCCCAGTATCAGCACTTCACGGACGACAT

CATCTTCTCCAAA---CGGGG-----ACGACTTCAACATCA  
TCGCGTCCAGGATGTACCTGGTGGCGCGGACCACGGAGAAGACCCGGGAG  
GAGGTGGTGGAGCTGCTGGAGAGGCTCCGGCCGCTCTCGCTCATCAACAG  
CATCAAGTTCATCGTGTTCACCCCACCTTCGTGTTCATGGACCGCTACA  
GCTCCTCGGTCGTCTCGCCCATCATGACGTCCGGCTTCAGCGTCCTGACC  
ATCCTCGTGCTCACGTCTTCTCCTCGTCGTCAACCCCCTGGGAAACTTCTG  
GTTGATACTGACCGTCACCTCCGTGGAGCTGGGGGTCCTGGGCCTGATG-

-----  
-----  
-----  
-----  
-----  
-----  
-----  
-----  
-----  
-----  
-----  
-----  
-----  
-----  
-----  
-----  
-----  
-----  
-----  
-----  
-----  
-----  
-----  
-----  
-----

-----TCCTACACCATAGAGATGGGCCCGAGAGGACCTCAGTGGAAGGA  
GAGCCCCAGCCGTTCGCCTGCTCCATCGAGGACCCACTAAGCAAACCA  
AGTTCAAGGGGATTAAGACTTACATATCGTACCGCGTGACTCCCAGCCAC  
GTTGGCCGGCCTGTGTACCGTCGCTACAAGCACTTCGACTGGCTGTATAA  
CAGGCTGCTGCACAAGTTCACCGTCATCTCCGTGCCCCACCTGCCCGAGA  
AGCAGGCGACCGGGCGTTTCGAGGAGGACTTTATCGAAAAGCGCAAGAGG  
CGGCTCATCCTCTGGATGGACCACATGACCAGCCACCCTGTCTCTCGCA  
GTACGAGGGCTTCGAGCACTTCTTCATGTGCGGGGACGACAAGCAGTGGA  
AGCTGGGCAAGCGGAGGGCGGAGAAGGATGAGATGGTGGGCGCCCACTTC  
ATGCTCACCTTCAGATCCCCAACGAGCACCAGGACCTGCAGGACGTGGA  
GGAGCGGGTGGACTCCTTCAAGGCCTTCGCAAAGAAGATGGACGACAGCG  
TCATGCAGTTGACGCACGTGGCCTCCGAGCTGGTGGCGCAAACACCTGGGA  
GGGTTCGCAAAGAGTTCCAAAGGCTGGGGAACCTTCCAGTCCATCAG  
CCAGGCGTTCATGCTGGACCCCCCTACAGCTCCGACGCCCTGAATAACG  
CCATCTCCCAC

-----  
-----  
-----

-----  
-----  
-----  
-----  
-----  
-----  
-----  
-----  
-----  
-----  
-----  
-----  
-----  
-----  
-----  
-----  
-----  
-----  
-----  
-----  
-----  
-----

-----GC  
CAAATCCCGCTTTCACCATGGCGTCGGCACGGGGCCTGGCACGGACC---  
GCAGCGTCCCCTC---AACAGCTTGTATCCCCGCAACAAACCGATGAG  
ACCGCAGTGG---CCTCCCCGAGCGATGGTTTGTCAACC---CTGCCAA  
CAACCGACTGGACTTTGCCGCTTCGGCATAACGATGCCGCCGCTGCAGCTG  
ATTTTGGCGGTAACGCGGCCACCCCTTCTGTCTACGCAGCTGCCGGAGTG  
AAAGCGC-----TCCCCTGCCCCACTGCAGGCTGCTCCAACAGGGCCCT  
GGGCTATTACGCGGAGCCGCCAG---GGTGG---GGCACACGCACTCCAC  
CGCAGTACTGT-----AGTAAATCAAGCGCGGTTCTCTCATGCTGG  
CCCGCCAATTCCGTTGGGTGCAGAACATCCA---CCTCCAATTACCTGG-  
--TTGGCTTGGACGA---CGTG---GACGC---TATCGCACCTGAGAGGT  
CACCT---CT---CGGGGGGGCAGACGAA---GCCAAGCCAAAAGACCT-  
-----GTCGGA---GTCAAGCTGGATAGAG---ACTCCGTCTTCAATTAA  
GTCAATCGATTCAAGTGATTCTGGGATCTTTG---AGCAGGCCAAACGGA  
GGAGGATTTCCGCATCTGCTACACCG-----GTTTCAGAGACGTCG  
TCCCCATTTAAAATCAGAACATCACTCAACAGGCGAAGTCACAGACAGAGA  
AGTGGCTTTGGGGATAAATCCGTTTCGCCGACGGGATGGGCGCTTCAAAA  
TCAACCACAGCTCCCACGATATTGGCTCGGG---GCAAAGTGGCTTTGCC  
TCGCAGGCG---CCCGGCTAC---GCAGCCGCTGCCCTGGGA---CACCA  
TCA-----CCACCCAACCCATGTCAGCTCC---TACTCCACCGCGGCGT  
TCAATTCACCCCGGACTTTCTCTTTCGGAATCGGGGATTTCGGAGACGCC  
ACTAG-----CGCGCAGCACAGTCTCTTCGCCTCAGC---TGC  
GGGAAGTTT---C-----GCAGGGCCACATGGACACACCGATGCCACGG  
GACACCTGCTCTTCTCGGGACTGCACGAG---CAAGCGGCGACCCACGCG  
TCTTCGAACGTGGTGAACAGTCAGATGCGCCTGGGCTTTTCGGGGGACAT  
GTACGGCAGAGCCGAGCAGTACGGTCATGTAACGAGCCCCCGGT---CCG  
AGCACTACGCTTCGACTCAGTTGCACGGCTATGGCCCCATGAACATGAAT  
ATGGCTGCC---CACCACGGGGCAGGGGCCTTCTTCCGTTACATGAGGCA  
GCCGATCAAACAAGAGCTCATCTGCAAGTGGGTGCAACCAGAGCAGCTGT  
CGAATCCGAAAAAGTCTGCAACAAAACCTTTCAGCACGATGCACGAGCTC  
GTGACCCACCTCACGGTGGAAACACGTCGGGGGACCAGGAACAATCGAATCA  
CATTTGTTTTTGGGAAGAGTGTCCGCGAGAAGGGAAACCATTTAAAGCCA  
AGTACAAAACCTGTAAATCATATCAGAGTGCACACCCGAGAGAAGCCGTTT  
CCATGTCCATTCCCCGGCTGTGGCAAG

>Plecoglossus altivelis  
AGCCTCCTCATTTCGAGCCGAACCTAAGTCAACCTGGCGCTCTCCTAGGAGA  
CGACCAGATCTATAACGTTATCGTTACTGCACACGCTTTCGTAATAATCT  
TTTTTATGGTTATGCCAATCATGATCGGGGGTTTCGGCAACTGACTGATC



AAAAACAGCGCGAGGAGCAGGCAGAGCCTGACGGCACTGAGGCTGCTGAC  
AAGTCAGCTTACCTAATGGGGCTGAACTCCGCAGATCTTGTGAAAGGACT  
CTGCCACCCAGGGTCAAGGTTGGCAATGAGTATGTCACCAAAGGGCAGA  
GTGTAGATCAAGTCTACTAC-----

-----  
-----  
-----  
-----  
-----  
-----  
-----  
-----  
-----  
-----  
-----  
-----  
-----  
-----  
-----  
-----  
-----  
-----  
-----  
-----  
-----

GGCTATCATCCCTTCGAATGGCAGCCGGCCCTCCGGAACGTCTCCTTGGC  
CTGTCAGGTGGGCATCATTGACGGCCTTTCAGGATGGATGGCGTCGGTGG  
ACGACTCCCCGGCGGACACCATCTCACGGAGGTTCCGCTACGACGTGGCT  
TTGGTGGCTGCTCTGAAGGACCTGGAGGAGGACATCGTAGAGGGCTTGAA  
GGAGCGGGCCTGGAAGACAGCTCCTGCACCTCAGGCTTCACCGTGACCA  
TCAAGGAGTCCCTGCGACGGCATGGGGGACGTGAGTGAGAAACACGGCGGG  
GGCCGGTGGTTCCCTGAAAAGGTCGTCCGCTTCTCCTTCACCGTCATGTC  
CGTCTCCATCCTGGCCGAGGGGGAGAAA-----  
-----GAGACGGTCACCATCTTCAGAGAGCAGAAGCCTAACTCGGAG  
ATGTCCTGCAAACCTCTCTGTCTGATGTTTGTGGATGAGTCGGACCACGA  
GACCCTGACAGCCATCTTGGGGCCTGTGGTGGCTGAGAGGAACGCCATGA  
AGAACAGCCGACTCATCCTCTCCATGGGTGGCCTCCCTCGTCTCTCCGC  
TTCTGTTTCAGGGGAACAGGCTACGACGAGAAGATGGTGCGGGAGATGGA  
GGGTTTAGAGGCCTCAGGCTCCACCTACGTCTGCACCCTCTGCGACGCCA  
CCAGAGCTGAGGCCTCCAAAACAAGGTGCTCCACTCCATCACCCGCAGC  
CACCATGAGAACCTGGACCGCTACGAGATGTGGAGGACTAATCCCTACTC  
TGAATCGGCTGACGAACTGCGAGATCGGGTGAAAGGGGTTTCCGCCAAGC  
CATTTCATGGAGACCCAGCCCACGTTGGACGCGCTCCACTGCGACATCGGC  
AAYGCCACCGAGTTCTACAAGATCTTCCAGGACGAGATTGGGGAGGTGCA  
TAGCAGGCC---CAAC---CCGAGCAGGGAGGAGCGGGCGGAGCTGGAGGG  
CGGCTCTTGACAAGCAGCTCCGGAAGAAGATGAAGCTGAAGCCCCTGATG  
AGGATGAACGGAACTTGGCCCGGCGACTGATGACGGTGGAGGCCGTGGA



GGCGGTGTGTGAACTGGTGCCTTCGCAGGAGCGGGGGGAAGCCCTCAGGG  
AGCTGATGAACCTCTACCTCCAGATGAAGCCCGTCTGGCGTGCCACGTGC  
CCGGCCAAAGAGTGCCCTGACCAGCTGTGTGCTATAGCTTCAACTCCCA  
GCGCTTCGCCGACCTCCTCTCTTCCACTTTCAAGTACAGGTACGACGGGA  
AGATCACCAACTACCTCCACAAGACTCTGGCCCAYGTTCTGAAATCATA  
GAGAGGGATGGCTCCATCGGGGCTGGGCCAGTGAGGGGAACGAGTCGGG  
GAACAAATCATAACCATTTGAGATGGGTCTAAAAGGACCTCAGTGGAAG  
AAAGCCCTCAGCCGTTCTTGTCTGTGGAAGACCCAATAACAGACC  
AAGTTCAAAGGTATCAAGACCTATATATCTTACCGGGTCACACCCAGCCA  
TACAGGCCGACCTGTCTACCGCCGTTACAAGCACTTTGATTGGCTGTACA  
ACCGTCTGCTGCATAAGTTTACCGTCATCTCCGTGCCCCACCTGCCCGAG  
AAGCAGGCTACTGGACGCTTCGAGGAGGACTTCATCGAGAAGCGCAAAG  
ACGATTGGTCATCTGGATGGATCACATGACCAGCCATCCTGTCTATCGC  
AGTACGAAGGCTTGGAACTTCCCTCATGTGTGCCGATGACAAGCAGTGG  
AAGCTGGGCAAAAGGCGGGCGGAGAAAGATGAGATGGTTGGAGCTCACTT  
CATGTTGACCTTTCAGATTCCCTAACGAGCATCAGGACCTGCAGGACGTGG  
AGGAGCGGGTGGACACTTTCAAGTCGTTTCGCTAGGAAGATGGACGAAAGC  
ATCATGCAGCTGACTCATGTGGCGTCAGAGCTGGTTCGAAAACACCTTGG  
AGGCTTCAGGAAAAGATTTCAACGTTTGGGAAAACGCTTTCAGTCCATCA  
GCCAGGCGTTTATGCTCGATCCTCCCCACAGCTCGGATGCCCTCAACAAC  
G-----  
-----C-GCGTCG-AGTG-TCGGCAATCT-CTGATCTCCAT-CTACTGG  
TCAAAGACAAGAGCCTGCACCGAGCGCCCTACTACTTCCCTGTTGGACCTG  
TGCGCCTCTGACATCATGCGTTCGCCATCTGCTTCCC-TTCGTGTTAC  
CTCCGTCAAGAATGGTTCCGCTGGACGTACGGAACCTTAACCTGCAAAG  
TGATCGCCTTCCCTCGGGGTGCTGTCTGCTTTCACACAGCCTTCATGTTG  
TTCTGCGTCAGCGTGACCCGATACCTGGCCATCGCCCACCACCGCTTCTA  
CACCAAGAGGCTGACCTTCTGGACGTGCCTGGCCGTCATCTGCATGGTGT  
GGACGCTGTGCGGTAGCCATGGCCTTCCCTCCGGTGTGGATGTGGGGACC  
TATTCCTTCATCAGAGAAGAGGACCAGTGCACCTTCCAACACCGATCCTT  
CAGAGCCAACGACTCCCTTGGCTTCATGCTACTGCTCGCGCTCATCCTGC  
TGGCCACACAGCTGGTCTACCTCAAGCTCATCTTTTTCGTCCATGACCGC  
CGGAAGATGAAGCCGGTTCAGTTTGTGCCAGCGGTCAGCCAGAACTGGAC  
CTTCCACGGGCCGGGGCTAGCGGCCAGGCGGCGGCTAACTGGCTGGCGG  
GCTTCGGAAGAGGCCCCACACCGCCACCTTCTGGGCATCAGGCAGAAC  
AGCAACGCGGCGGGCCGAGGCGACTCCTGGTGTGGACGAGTTCAAGAC  
AGAGAAAAGGATCAGCAGGATGTTCTACATTATGACCTTCTTCTTCTTGG  
CACTGTGGGGGCCCTATCTGGTGGCTGCTACTGGAGGGTGTTCGCTAGG  
GGCCCTGCTGTACCAGGGGGCTACCTGACCGCCGCGTGTGGATGAGCTT  
TGCCAGGCAGGGGTCAACCCC-TCATCTGC-----G  
CCAAATCTCGCTTTCACCCTGGCGTAGGGACCGGTCCTGGCACGGAGC--  
-GCAGCGTCCCCTTAGTAACAGCTTGCTATCCCCGCAACAAACCGAAGA  
GCCACAGTTG---CTTCCCCACAGCGTTGGTTTGTCAACC---CTGCCA  
ACAACCGACTGGACTTTGCCGCCTCGGCATACGATGCTGCCGCTGCTGCA  
GATTTTGCCGGCAACGCGGCCACCTTGCTGTCTACGCAGCGGCTGGAGT  
GAAGGCGC-----TTCCCCTCTCCACGGCAGGTTGCTCAAACAGACCGC  
TCGGGTATTACACCGACCCGTCAG---GCTGG---GGCACTCGTACGCCA  
CCACAGTACTGT-----AGCAAGTCGAGCTCCGTTCTCTCATGCTG  
GCCTACGAATACTGTTACGGGCAGAACGGGCC---CTTCCAGTTACCTTG  
-----CCGAGGA---TGGA---GATGC---TATACCCACAGAGCGG  
TCTCCA---AT---AGGGGCGTCAGACGAG---GCTAAACCAAAGACTT  
-----GTCCGA---GTCCAGCTGGATAGAG---ACGCCGTCTTCAATAA  
AGTCCATTGATTCTAGTGATTCTGGAATCTTTG---AGCAAGCAAACCG

AGAAGAATTTCTCCGTCTGCCACACCA-----GTTTCGGAGACGGT  
GTCTCCGTTAAAATCCGAG-----

-----ACTGCATTTTC  
CTCCAAGCG---CCCGGCTAT---GCAGCCGCTGCCCTGGGA---CATC  
ACCA-----CCACCCTACTCATGTCAGTTCT---TACTCTACGGCGGCT  
TTCAATTCACCCCGGATTTTCTCTTCAGAAATCGTGGCTTCGGAGACGC  
TACCAG-----CGCTCAGCACAGTCTCTTCGCCTCCGC---AG  
CGGGAAGTTT---T-----GCAGCCCCACATGGACACTCAGATGCAGCG  
GGACACCTGCTCTTCCAGGACTTCACGAA---CAAGCCGCAAGCCATGC  
TTCTCAAATGTTGTTAATAGTCAGATGCGATTGGGCTTTTCGGGGGACA  
TGTACGGCAGAGCCGACCAGTATGGCCACGTTACCAGCCCGCGGT---CC  
GACCACTATGCATCGACCCAGTTACATGGCTATGGCCCTATGAACATGAA  
TATGGCCGCG---CATCATGGAGCAGGGGCCTTCTTCCGTTACATGAGGC  
AGCCGATAAAACAAGAGCTGATCTGCAAGTGGATCGAACC GGAGCAACTA  
ACGAACCCCAAAAAGTCGTGCAACAAAAC TTTTAGCACAATGCACGAGCT  
CGTCACCCATCTGACCGTGGAGCATGTGGGAGGACCGGAGCAGTCAAACC  
ACATTTGCTTCT-----

>Polymetme thaeocoryla

AGCCTGCTTATCCGAGCGGAATTAACCAACCCGGCACCCTTTTAGGAAA  
CGACCAAATTTATAATGTAATTGTTACAGCACATGCCTTTGTAATAATCT  
TCTTCATAGTGATAACCAATCATAAATTGGAGGCTTTGAAACTGACTAATC  
CCTCTTATGATTGGGGCTCCTGATATAGCCTTTCCCGAATAAATAACAT  
AAGCTTTTGGCTTCTCCCACCCTCCTTCCTCCTTCTACTTGCCTCCTCCG  
GAGTTGAAGCCGGGGCTGGGACTGGATGAACAGTCTATCCCCACTTGCC  
GGCAATTTAGCCCACGCAGGGGCCTCCGTTGACCTAACCATTTTCTCCCT  
GCATCTTGCAGGGATCTCTTCAATCCTTGGGGCAATCAACTTTATTACCA  
CAATTATTAACATGAAACCCCCAGCTATTTCCCAATACCAAACACCCCTC  
TTTGTCTGAGCTGTCCTTGTACCCTGTTCTTCTTCTCCTATCTCTCCC  
AGTCTTAGCTGCTGGAATTACCATGCTTTTGGACAGACCGAAACCTGAACA  
CGACCTTCTTTGACCCAGCAGGAGGGGAGACCCCATTTCTTTACCAACAC  
CTCTTCTGATTCTTTGGGCACCCCGAGGTATATATTTAATCCTTCCAGG  
CTTTGGTATAATCTCTCACATTGTTGCCTACTATTCAGGGAAAAAGAAC  
GCTTTATTGTCTGGGCCATCATATGTTTACAGTCGGAATGGACGTAGA  
CACCCGAGCCTATTCTGAGAGGNACCTGCACCCGTCCAACCTGTCTGGGA  
ATGCTGCTCCTCTCGGACGCCACCAGTGCGCCAAGCTGTCTGGAGCTGTC  
CTGGGGCATGTGCCTCAGCAACTTCCCCGCCATCTGCAAGACGGAGGACT  
TCCTGCAGCTGCCCAAAGACATGGCGGTCCAGCTGCTGTCCCACGAGGAG  
CTGGAGACGGAGGACGAGAGGCTGGTCTACGAGGCYGCCCTCAACTGGGT  
CAACTACGACCTGGAGAGGCGGCACCTGCCACTTGCCGGAGCTGCTGAGAA  
CCGTTTCGTCTGGCGCTGCTGCCCCGCATCTTCTCATGGAGAACGTCTCC  
ACGGAGGAGCTGATCAACGCCCAGACCAAGAGCAAGGAGCTGGTGGACGA  
GGCCATCCGCTGCAAGCTGAGGATCCTGCAGAACGAGGGCGTGGTCAACA  
GCCCCGTGGCGCGGCCAGGAAGACCAGCCACGCCCTCTTCTGCTGGGC  
GGGACAGACCTTCATGTGCGACAAACTCTACCTGGTGGACCAGAAGGCCAA  
GGAGATCATCCCCAAGGCGGACATCCCCAGCCCCAGGAAGGAGTTCAGCG  
CCTGCGCCATCGGCTGCAAGGTCTACATCACCGGAGGCA--GGGGCTC-T  
GAGAACGGGGTCTCCAAAGATGTTTGGGTCTACGACACGTCCCATGAGGA  
GTGGTTCGAAGGCGGCTCCCATGCTCATCGCCCGGTTCCGGCCATGGTTCTG  
CAGAACTCAAACACTGCCTCTACGTGGTGGGCGGACACACGGCCGGCAGC

GGCTGCCTCCCCGCCTCCCCCTCG-----

-----AAGAGGGATCCCAGCAAGGGAACCTTGGAGGATCAAATCA  
TCCAGGCTAACCTGCCCTGGAGGCTTTCGGTAATGCCAAAACGGCGAGA  
AATGACAACTCGTCACGCTTTGGCAAATTCATCCGGATTCACTTTGGAAC  
CAGTGGCAAGCTGTCCCTCTGCAGACATAGAGACTTACCTTCTGGAAAAGT  
CACGTGTACCTTTCAGCTCAAGGCAGAGAGGAACTACCATATCTTCTTC  
CAGATCTTGTCCAATCAAAGCCAGAGCTGTTGGACATGCTTCTAATCAC  
CAACAATCCATATGACTACTCCTACATCTCCAAGGAGAGGTAACAGTAT  
CATCCATCAATGATTCTGAGGAATTGATCGCCACTGACAGTGCATTCGAT  
GTGCTTGGCTTTACTCAAGAGGAGAAAATGGGGGTCTACAAGTTGACAGG  
TGCAATCATGCATTACGGTAACATGAAGTTCAAGCAAAGCAGCGCGAGG  
AGCAGGCAGAGCCTGACGGCACCGAGGCTGCTGACAAGTCAGCTTACCTA  
ATGGGGCTGAACTCTGCAGATCTAGTGAAAGGACTGTGCCATCCCAGGGT  
TAAGGTTGGCAATGAGTTTGTCTACTAAAGGGCAGGGTGTAGACCAAGTCT  
ACTAC-----

-----TACCTGATCTACGCCTCCTTCTCCTTCAT  
GGGATGTTTACAAATCAGCGACGGATCCAATGTGGTCAACCTGTTAGCCA  
GCAACTCCCCGAGCGTGACCTACGCTCTGACCCAGCAGAAGTACTTCAGT  
AACTACAGCCCTGTGATCGGGTCTATATCTACGAGCCCGTGGAGTACTG  
GAACTCCACGGTGCAGGAGCACCTGAAAACCCTGGGCCACGGCTTCAACA  
AGATCTCCTGGATGGACAACTACTTCCACTATCTGAAGGTGGTGAATGTG  
ACCGCTCCACCAAGAGCCACTTCATCGCCATCCTCAAAGGTTCTTCCCT  
AAGGAGCCCGGAGTACCAGCACTTCACGGAGGACATCATCTTCTCCAAGA  
---ACGGCG-----AGGAGTATGACATCATCGCGTCCAGGATG  
TACCTGGTGGCGCGGACCACAGAGAAGACCCGGGAGGAGGTGGTGGAACT  
GCTGGAGAGGCTCCGCCCCCTCTCCCCTCATCAACAGCATCAAGTTCATCG  
TCTTCAACCCACCTTCGTCTTCATGGACCGCTACAGCTCCTCGGTCATC

TCTCCCATCCTCACCTCGGGCTTCAGCGTCCTCACCATCCTCATCCTCAC  
CTTCTTCCTGGTCATCAACCCCTGGGGAACCTTCTGGTTGATCCTGACGG  
TGACCTCGGTGGAGCTGGGCGTTTTGGGCCTGATGGGCTACCACCTCTTT  
GAGTGGCAGCCGGCCCTCAAGAATGTGTCCACGTCTGCCAGGTGGGCAT  
CATCGACGGGCTGTCAGGGTGGGCTGCCTCCGTAGATGACTCCCCGGCGG  
ATACCGCCGCCCGGCGTTCCGCTACGACGTGGCGCTGGCCTCGGCTCTG  
AAGGACCTAGAGGAGGACATCATGGAGGGGCTGAGGGAGCGCGACCTGGA  
GGACAGCGCCTGCACCTCGGGCTTCAGCGTGATGATCAAGGAGTCTGCG  
ACGGCATGGGCGACGTCAGCGAGAAGCACGGCGGGGGGGCGGCGGTGCC  
GAAAAGGCAGTGCGATTCTCCTTCACCGTCATGTCTGTCTCCGTGCAGGC  
TGAGGGGGAGGAC-----AAGGCCG  
TCACCATCTTCAGGGAGCCCAAGCCCAACTCTGAGCTGTCCTGCAAGCCT  
CTGTGTCTGATGTTTTGTGGATGAGTCTGATCATGAGATGCTGACGGGCGT  
CCTTGGGCCTGTGGTGNCCGAGAGGAACGCCATGAAGAACAGCCGCCTCAT  
CCTGTCTCTGGGAGGCCTCCCTCGATCCTTCCGCTTCCACTTCAGGGGCA  
CCGGCTATGATGAGAAGATGGTGCCTGAGATGGAGGGCCTGGAGGCCTCG  
GGCTCCACATACATCTGCACCCTCTGTGACTCCACCCGGGCGAGAGGCCTC  
CCACAACATGGTGCTGCACTCCGTTACCCGCAGCCACGACGAGAACATGG  
AGCGCTACGAGATCTGGAGGACCAACCCCTACTCCGAGTCNCCAGATGAGC  
TTCGGGATCGGGTCAAAGGCGTCTCAGCCAAACCTTCATGGAGACCCAG  
CCCACCCTGGACGCACTGCACTGTGACATCGGTAACGCCACTGAGTTCTA  
CAAGATCTTTCAGGATGAGATCGGGGAGGTGTACCGGAGGCC---GAAT-  
--GCAAGCAGGGAGGAACGCCGGAGCTGGCGGGCTGCTCTGGACAAGCAG  
CTGAGGAAGAAGATGAAGCTGAGGCCAGTGATGAGGATGAATGGGAACTA  
TGCCCGGCGGCTGATGACCAGCGAGGCGGTGGAGATCGTGTGTGAGCTGG  
TCCCCTCAGAACAGCGGCAGGAGGCCCTCAGGGAGCTGATGGGGCTCTAC  
CTCCAAATGAAGCCTGTTTTGGCGCGCCACCTGCCAGCCAAAGAGTGCCC  
TGACCAGCTTTGCGGCTACAGCTTCAACTCCAGAGGTTTCGCTGAGCTCC  
TCTCCTCCATCTTCAAGTACAGATACGACGGTAAGATCACCAACTACCTC  
CACAAGACACTGGCCACGTCGCGGAGATCGTAGAGAGGGACGGCTCCAT  
CGGGCCTGGGCCAGCGAGGGAAACGAGTCGGGCAACAAGTCTTACACAA  
TCGAAATGGGCCCCAAAGGGCCTCAGTGGAAGGAGAGCCCTCAGCCTTTC  
TCTTGTTCCGTTGAGGACCCTACCAAACAGACCAAGTTCAAAGGCATCAA  
GACTTACATATCTGACGGGGTCACTACCAGCCACACCGGGCGATCGGTAT  
ACAGTCGGTACAAGCACTTTGATTGGCTGTACAACCGCATGCTGCACAAG  
TTCATGTATCTCTGTGCCTCACCTGCCAGAGAAAACAGGCCACCGGGCG  
TTTCGAGGAGGACTTCATCGAAAAGCGAAAAGGCGGCTGATCCTCTGGA  
TGGACCACATGACCAGCCACCCGGTCTCTCCCAATACGAGGGCTTTGAG  
CACTTCTCATGTGMGCCGACGACAAAACAGTGGAAGCTGGGCAAGCGGCG  
GGCGGAGAAGGACGAGATGGTGGGCGCCACTTCATGCTGACCTTTCAGA  
TTCCAACGAGCACCAGGACCTGCAGGACGTGGAKGAGCGGGTGGACTCC  
TTCAAGTCGTTTGCTAAGAAGATGGACGATAGCGTCATGCAGYTGACGCA  
MGTGGCCTCGGAGCTGGTGCGGAAACACCTAGGGGGTTTTCCGGAAGGAGT  
TCCAGCGTCTGGGGAACGCTTTCAGTCCATTAGTCAGGCGTTCATGCTG  
GACCTCCTCACAGCTCTGATGCCCTCAACAACGCCATCTCACAC-----  
-----AACTGACCTCCC TGGGATT CATCATCGGTGT CCGGAG  
TGGTCCGCAACCTCCTGATCTCCATCCTGCTGGTTAAAGACAAGAGCCTG  
CACCGAGCGCGTACTACTTCCCTGTTGGACCTGTGCGCCTCCGACATCCT  
GCGCTCCGCCATCTGCTTCCCTTCGTGTTACCTCCGTCAAGAACAGCT  
CCGCCTGGACCTACGGCACGCTCACCTGCAAAGTGATCGCCTTCTGGGC  
GTGCTGTCCTGCTTTCACACTGCCTTCATGTTATTCTGCGTCAGTGTGAC  
CCGCTACCTGGCCATAGCCCACCACCGCTTCTACACCAAGAGGCTGACCT  
TCTGGACCTGCCTGGCTGTATCTGCATGGTGTGGACACTGTCTGTGGCC

ATGGCGTTTCCTCCGGTGCTGGACGTGGGGACTTACTCCTTCATCAGAGA  
GGAGGACCAGTGCACCTTCCAGCATCGCTCCTTCAGAGCTAACGACTCGC  
TGGGCTTCATGCTGCTGCTAGCCCTCATTCTGCTGGCCACACAGCTGGTC  
TACCTCAAGCTCATCTTCTTCGTCCACGACCGCCGGAAGATGAAGCCCGT  
CCAGTTCGTACCCGCCGTAGCCAGAACTGGACCTTCCACGGGCCGGGTG  
CCAGCGGGCAGGCAGCTGCTAACTGGCTGGCGGGCTTCGGTAGAGGCCCC  
ACCCCGCCCACCCTGCTGGGCATCAGGCAGAATAGCAACGCGGGCGGGCCG  
CAG-CGGCTCCTGGTGCTGGACGAGTTCAAGACGGAGAAGAGGATCAGCA  
GGATGTTCTACATCATGACCTTCTTCTTCTGCGCTGTGGGGGCCCTAC  
CTGGTGGCCTGCTATTGGAG-GTGTTTGCCAGGG--CCCGCGTGCCCGG  
-GGCTACCTGACCGCTGCCGTGT-GATGAGCTTTGCCAG--CGGGGTCA  
ACCC--GCCAAATCTCGCTTTCAC  
CCTGGCGTAGGGACCGTCTGGCACGGACC--GCAGCGTCCCCTCAG  
TAACAGCTTGCTATCCCGCAACAAACCGAGGAGCCACGGTTG---CCT  
CCCCACAGCGATGGTTTGTACCC---CTGCCAACAACCGACTGGACTTC  
GCCGCTCGGCATACGATGCTGCCGCTGCCGAGACTTTGCCGGCAACGC  
GGCCACCTTGCTGTCTACGCAGCGGCTGGAGTGAAGGCTC-----TTC  
CCCTGTCCACGGCAGTTGCTCTAACAGACCTCTCGGGTATTATGCCGAC  
CCGTCAG---GCTGG---GGCGCACGCACACCACCACAGTACTGT-----  
----AGCAAGTCCAGCTCGGTTCTCTCCTGCTGGCCACAAATACTGTTG  
GGGGCAGAACAGGCG---CCTCCAATTACCTGT-----CTGAGGA-  
--CGGG---GACGC---TCTCCCCACAGAGAGGTCCTCG---AT---AGG  
CGCGTCCGACGAG---ACAAAACCAAAGACTT-----GTCCGA---AC  
CCAGCTGGATAGAG---ACGCCGCTTCAATAAAGTCAATTGATTCAAGT  
GATTCTGGAATCTTTG---AGCAAGCAAACCGAGAGAAGATTTCTCCTTC  
TGCCACACCA-----GTTTCGGAGGCTGTGTCCCCGTTGAAATCCG  
AG-----ACAGGCGAAGTACAGAAAGGGAAGTGGCTTTGGGGATA  
AATCCGTTTCGACAGCGGGATGGGCGTTTTCAAATCAACCACAGCTCGCA  
TGATCTTGGCTCCGG---GCAAACAGCGTTTTCTCCCAAGCG---CCCG  
GCTAC---GCAGCCGCTGCCCTCGGA---CACCACCA-----CCATCCG  
ACACATGTCAGCTCG---TACTCCACTGCGGCTTCAACTCCACCCGGGA  
CTTTCTCTTCAGAAATCGGGGCTTCGGAGACGCCACCAG-----  
-TGCKAACACAGTCTCTTCGCATCCGC--AGCGGGAAGTTT---T---  
---GCAGGGCCACATGGACACTCAGATGCCGCGGGACACCTGCTCTTCCC  
GGGACTTCACGAG---CAAGCCGCGAGTCATGCGTCTTCAAATGTTGWTA  
ACAGTCAGATGCGGTTGGGCTTTTCGGGGGACATGTACGGGCGGGCCGAC  
CAGTATGGCCACGTTACCAGCCCACGGT---CCGACCACTATGCTTCGAC  
CCAGTTGCATGGCTATGGCCCTATGAACATGAATATGGCCGCA---CATC  
ATGGAGCAGGGGCTTCTTCCGTTACATGAGGCAGCCGATAAAACAAGAG  
CTGATCTGCAAGTGGATCGAACCAGAGCAACTAACGAATCCGAAAAAGTC  
GTGCAACAAAACCTTTAGCACGATGCACGAGCTGGTGACCCATTTGACGG  
TAGAACATGTGGGGGACCGGAGCAGTCGAACCATATTTGCTTCTGGGAA  
GAGTGTGCCCCGAGAAGGAAAACCATTCAAAGCCAAATACAAACTTGTGAA  
CCACATCAGAGTGCACACCGGAGAAAAACCGTTTCCATGTCCTTTTCCCG  
GCTNNNNNNNN

>Polymixia japonica

AGTCTCCTCATCCGGCAGAATTAAGTCAACCCGGGGCCCTACTAGGGGA  
CGATCAAATCTACAACGTTATTGTTACGGCACATGCCTTTGTAATAATTT  
TCTTTATAGTAATAACCAATTATGATTGGTGGATTTGGCAACTGACTTATC  
CCACTAATGATCGGAGCCCCGATATGGCATTTCCTCGAATAAATAACAT  
AAGCTTTTGACTACTACCCCCCTCATTCCTCCTATGCTAGCTTCTCTG  
GCGTAGAAGCAGGGGCTGGCACAGGGTGAAGTGTATATCCCCCTCTTGCA  
GGCAACCTTGCGCACGCTGGTGCTCAGTTGATCTGACTATTTTCTCCCT

TCACTTAGCAGGTGTCTCCTCAATTCCTGGGGCCATCAATTTTATTACAA  
CTATTATTAACATGAAACCCCCAGCTATTTCCCAGTACCAAACACCTTTA  
TTTGTGTGATCAGTTTTAATTACAGCTGTCCTTCTACTACTCTCCCTGCC  
CGTGCTTGCGGCTGGTATTACCATGCTACTAACAGACCGAAATCTAAACA  
CTACTTTCTTTGACCCCGCTGGAGGAGGAGACCCCTATTCTATAACCAGCAC  
TTGTTCGATTCTTTGGCCACCCCGAAGTATATATTTTAATTTTACCAGG  
ATTTGGTATAATTTCCCACATTGTTGCATACTACTCCGGCAAAAAAGAAC  
CCTTCGGCTATATGGGCATGGTCTGAGCCATAATGGCCATCGGACTACTT  
GGGTTTATCGTATGAGCCATCATATGTTCACTGTTGGTATGGATGTGGA  
CACACGAGCTTATTTCTGGAGAGGAACCTCCACCCATCCAAGTCCCTGGG  
CATGCTGTTGCTGCTGATGCCACCAGTGTACCAAATTATCAGAGCTCT  
CCTGGGGCATGTGCCCTCAGCAACTTCCCTGCTATTTGCAAGACAGAAGAC  
TTCTCCAAGTCCCAAAGACATGGTGGTGCAGCTTCTGTCTCATGAGGA  
GCTGGAGACAGAAGATGAAAGACTGGTTTATGAGGCTGCTCTTAACTGGG  
TCAACTATGACCTGGAAAGGAGGCACTGCAACCTTCCAGAGCTGTTGAGA  
ACAGTTCGCCTGGCACTGCTTCCCTGCCATCTTCCCTTATGGAGAATGTCTC  
CACAGAAGAGCTGATAAATGCCAGGCCAAGAGCAAGGAGCTGGTGGATG  
AGGCCATCCGCTGCAAGCTGAAGATCTTGCAGAATGATGGTGTGGTTAAC  
AGCCCCGTGTGCCCGGCCACGAAAAACCAGCCACGCCCTCTTTCTRCTGGG  
AGGGCAGACCTTCATGTGCGACAAGCTGTACCTGGTGGACCAGAAGGCCA  
AAGAGATCATCCCCAAGGCTGACATCCCCAGCCCCAGGAAGGAGTTCAGT  
GCCTGTGCCATCGGCTGTAAGGTTTACATCACAGGCGGGA--GAGGCTC-  
AGAGAATGGTGTGTCGAAAGACGTGTGGGTCTATGACACCGTCCATGAGG  
AATGGTCCAAGGCAGCACCCATGCTCATTGCCCGTGGTGTACGGTCT  
GCTGAGCTGAAACACTGCCTCTATGTGGTGGGAGGTCACACAGCAGCGAC  
CGGCTGTCTTCCCTGCCTCTCCCTCCGGATAATTACATTGTAGTGTTCAGT  
CGTTCAACAACAAGGCTGATTCTGAACGAAGTGGAGCTGATCATGTCGCT  
GGCCAGGAGTTTCAAATGAGAGTAGTACAGTCTCCCTGGAGGAGCAGT  
CTTTCCCCAGCATTGTCCAGCTGATCAGCAGAGCCTCCATGTTAGTGAGC  
ATGCATGGAGCTCAGCTTGTACCTCGCTGTTCCCTGCCGAGAGGAGCTGC  
TGTGGTGGAGCTGTTCCCCTATGCTGTGAACCCAGAACAGTACACTCCAT  
ATAAGACCCTTGCCCTCCCTACCAGGCATGGACCTGCAATATGTTTCCTGG  
AGGAACATAATGGAGGAGAACACTGTCACCCACCCAGACAGACCCCTGGGA  
CCAAGGGGGCATTGCCACCTGGAAAAGCAGGAGCAAGAACGCATACTTT  
CCAGCAAAGATATTTCCAGGCACCTGTGTTGCCGAAACCCAGAGTGGCTC  
TTTTCGAATCTACCAGGAYACTTTGGTGGACATCCCTTCATTCTGGAAGT  
CCTCAA---AGAGGGCTTAAAG---ACCAGGCCAGCTTGAAGAA---GT  
CCAAGCCAGCCAGCACAGTACATCCAGGCCGGGTGAGAGAACCCCAATGC  
CAGACTTCAGTCCAAGCCACAAATGAGGCTAAGCTTACAGTCTCCTGGCA  
GATCCCCTGGAATCTGAAATATCTGAAGGTGAGAGAAGTGAAGTAYGAAG  
TGTGGATCCAGAAGAAGGATGCCAGCAAAGGAACACTGGAGGATCAAATC  
ATCCAGGCCAACCCCTGCACTGGAGGCCTTTGGTAATGCCAAAACAGTTAG  
GAATGATAACTCCTCCCGTTTTGGAAAATTCATCCGAATTCACCTCGGAA  
ACAGTGGCAAGCTGTCTCTGCTGACATTGAGACTTACCTGCTGGAGAAG  
TCACGTGTCACCTTTCAGCTTAAAGCTGAGAGGAACTACCACGTCTTCTT  
CCAGATCTTGTCCAATCAGAAGCCAGAGCTGCTGGACATGTTGCTGATCA  
CCAACAATCCATACGATTACTCCTTCATCTCCCAAGGAGAGGTGACAGTA  
GCATCCATCAACGACTCAGAGGAGCTGTTAGCCACTGACAGCGCCTTTGA  
TGTGCTTGGCTTCACTCAGGAGGAGAAGATGGGAGTGTACAAGTTGATTG  
GTGCCATTATGCACTACGGCAACATGAAGTTCAAACAGAAGCAGCGTGAA  
GAGCAGGCTGAACCTGATGGAACCTGAGGCTGCTGATAAGTCAGCTTACTT  
GATGGGGCTGAACTCTGCAGACCTTATCAAAGGACTGTGTTCATCCCAGAG  
TCAAAGTAGGAAATGAATATGTCACCAAAGGTCAAGGTGTAGACCAAGTC

TACTACCCCAACAAGGAGGCCTTCAAGTGCAGGAGTGCGGGAAGCACTA  
CAACACCAAGCTGGGCTACAAGCGCCATGTGGCCATGCACTCTGCCACGG  
CGGGGACCTCACCTGCAAGGTGTGCATGCAGAGCTACGAGAGCACGCCG  
GTGCTCCTGGAGCACCTGAAGAGCCACTCGGGGAAGTCCACGGGCGGCGC  
CAAGGAGAAAAAGCACCCGTCGCATCACTGCGACCGTCGTTCTACACCC  
GCAAGGACGTCAGGCGGCACATGGTGGTCCACACGGGCCGAAAGGACTTC  
CTGTGCCAGTACTGCGCCAGCGCTTTGGCCGGAAGACCACCTGACGCG  
TCACGTCAAGAAGAGCCACTCGCAGGAGCTGCTGAAGATCAAGACGGAGC  
CTCCGGACATGTTAGGTCTCCTAGGTTCTGGCTCTCCGCCTTGCTCTGTC  
AAGGAGGAGCTTAGCCCTATGATGTGCAGCATGGGTCCCAACAAGGACCC  
CATGATGGGCAAACCCCTTCCCCAGTGGGACCCCTTCCCCATGGGCATGT  
ACAACCCCAACCAC-----CTCCAGGCCATGTCCAACCTCTGGGGTGGGT  
CACCC-----CACCCCTCCCTGATGTCTAGTTTCGCTCTCTGCAGCCAT  
GGGCATGGGCTGTACATGGAATATCTCATCTACGCTTCCTTCTCCTTCA  
TGGGATGTTTACAAAATCAGTGACGGATCAAACATCGTGAATTTGCTGGCT  
AGTAACTCTCCGAGTGTTCGTACGCTCTGACCCAGCAGAAATACTTTAG  
TAACTACAGTCTGTGATTGGGTTCTACATTTATGAGCCTATTGAATACT  
GGAACTCCACGGTGCAGGAGCACCTGAAGACGCTGAGCCACGGCTTCAAC  
AAGATCTCCTGGATGGACAACCTTCTATCACTACCTGCGGGTGGTGAACGT  
GAGCGCTCCACAAAAGAATGACTTCATTACCATCCTCAAGGGCTCCTTCT  
TACGCAGCCCGGAGTACCAGCACTTACCAGGACATCATCTTCTCCAAG  
A---ACCGTGAAAAGTG-----ACGAGTATGACATTATCGCCTCACGGAT  
GTACCTGGTGGCGCGGACCACGGAGAAGAAGCGCGAGGAGGTGGTGGAGC  
TTCTGGAGAAGTTGCGACCACTGATGCTGATCAACAGCATCAAGTTCATC  
GCCTTCAACCCACCTTTGTGTTTCATGGACCGTTATAGCTCCTCGGTAAT  
ATCGCCCATCCTGACCTCGGGCTTTAGCGTGCTCACCATTCTCATCCTCA  
CCTTCTTCTGGTTCATCAACCCCTTGGGAACTTCTGGCTCATCCTAACG  
GTCACCTCTGTGGAGTTGGGCGTGCTGGGTTAATGGGCTATTACCCGTT  
CGAGTGGCAGCCGGCCCTCAAAAACGTGTCCGCGTCTGCCACGTGGGTA  
TTATCAACGGGCTGTGCGGGTGGGCTTCCTCGGTGGATGATTCCCTGCC  
GACACCATCACTCGGAGGTTTCGCTACGATGTGGCCTTGGTGTCCGCCCT  
AAAGGATCTGGAAGAGGACATCGTGGAGGGTTTGAGACAGTGTGGCCTGG  
AAGACAGCGTGTGCACCTCAGGCTTCAGCGTTATGATTAAGGAGTCTGC  
GATGGCATGGGAGACGTCAGCGAGAAGCACGGTGGAGGGCCGGCAGTCCC  
TGAGAAGGCTGTACGCTTTTCTTTCACCATTATKTCCTGTCTCTGTTCAGG  
GAGATGGAGAGGAA-----GAGGCG  
GTTACAATCTTCAGGGAGCCAAAGCCAAACTCCGAACTGTCCTGTAAACC  
CCTATGCCTGATGTTGTGGATGAGTCAGACCACGAGACACTCACTGCTG  
TCCTGGGGCCGCTGATTGCGGAACGGAGCGCAATGAAGCATAGCCACCTT  
CTCCTGTCAATAGGTGGCCTCACGCGCTCCTTTCAGCTTCCACTTCAGAGG  
CACGGGCTATGATGAGAAGATGGTACGTGAGATGGAGGGCCTGGAGGCCT  
CAGGCTCCACCTACGTCCTGCACCTGTGTGACTCCACTCGAGCACAGGCC  
TCTGAAAACATGGTGTCCACTCCATCACCCGCAGTCACGATGACAACCT  
GGAACGCTATGAAATATGGAGGACCAATCCCTTTTCAGAGTCCATAGAAG  
AGCTGCGAGACCGGGTGAAAGGGGTCTCAGCCAAGCCCTTTATGGAGACC  
CAGCCCACTATGGACGCATTGCACTGTGACATTGGTAATGCCTCTGAGTT  
CTACAAAATCTTTTCAGGATGAGATTGGGGAGGTATTCAGAAGGC---CA  
AC---CCCACTCGGGAGGAGCGTCGGAGCTGGCGGGCCGCCCTCGACAAG  
CAGCTGAGGAAGAAGATGAAGCTGAAACCGGTGATGAGGATGAACGGGAA  
CTACGCCCCAAGGCTGATGAGTCAGGAAGCTGTAGAGCTAGTGTGCGAGC  
TGGTGGCCTCAGAGGAAAGGCGGGAGGCCCTGAGGGAGCTCATGGCGCTC  
TACCTCCAGATGAAAACCTGTGTGGCGTGCCACCTGTCCAGCCAAAGAGTG  
CCCAGACCAGCTTTGCCGCTACAGCTTCAACTCCAGCGATTTGCTGATC

TCCTCTCTACTAAATTCAAATATAGGTACAACGGGAAGATTACCAATTAC  
CTGCACAAGACCCTGGCCCATGTCCCTGAAATTATAGAAAGAGATGGTTC  
CATTGGAGCCTGGGCCAGTGAGGGGAATGAGTCAGCAAACAAATCGTACA  
CCATTGAGATGGGTCCCAAGGGGCCCCAGTGGATGGAGAGCCCTCAGCCT  
TTTTCTTGCTCCATTGAAGACCCCACAAAACAAACCAAATTCAAGGGTAT  
AAAGACCTACATTTTCGTACCGGGTCACGCCGAGCCACACGGGGCGGCCG  
TCTACAGACGTTACAAACACTTCGACTGGCTGTACAATCGCTTGCTGCAC  
AAGTTCACTGTGATCTCGGTGCCCCACCTGCCTGAGAAGCAGGCCACTGG  
GCGCTTTGAGGAGGACTTCATCGAGAAGCGTAAAAGACGACTGATCCTGT  
GGATGAACCACATGACCAGCCACCCGGTCTCTCCAGTATGAGGGATTC  
GAACACTTCCTCATGTGTGCCGACGACAAGCAGTGGAAGCTGGGCAAAG  
GCGGGCTGAGAAGGACGAGATGATCGGCGCCCACTTCATGCTGACCTTC  
AGATTCCCAACGAGCACCAGGACCTCCAGGACGTCGAGGAGAGAGTTGAC  
TCCTTCAAGAACTTTGCGAAGAAAATGGACGACAGTGTCTGCAGCTCAC  
GCACGTGCTCGGAGCTTGTGCGTAAGCACCTCGGAGGATTCAGGAAGG  
AGTTCAGAGACTAGGAAATGCCTTCCAGTCTATCAGCCAGGCATTCATG  
CTGGAACCTCCTCACAGCTCAGATGCCCTGAACAACGCCATCTCCACNNNNNNNNNNCG  
TTCCCTCAAACCTGACCTCTCTGGGTTTCATTATTGGAGTCGGCGTGGTTCGG  
AAACCTCCTGATCTCCATCCTGCTGGTCAAAGACAAGAGCCTGCACCGCG  
CGCCCTACTACTTCTGCTGGACCTGTGCGCCTCGGACATCCTGCGCTCC  
GCCATCTGCTTCCCTTTTGTCTTACCTCGGTCAAGAATGGATCCGCCTG  
GACCTACGGCAGCTCACCTGCAAAGTGATCGCCTTCTGGGCGTGTCTT  
CCTGTTTCCACACGGCCTTTCATGCTGTTCTGCGTCAGCGTCACCCGTTAC  
CTGGCCATCGCGCACCACCGCTTCTACACCAAGAGGCTGACCTTCTGGAC  
CTGTCTGGCTGTCATCTGCATGGTGTGGACGTTGTGCGTGGCCATGGCCT  
TTCCCCGGTGCTGGACGTAGGCACGTAATCCTTCATCCGGGAGGAGGAC  
CAGTGCACATTCAGCACCCTTCTTCCAGGGCCAACGACTCGCTGGGCTT  
CATGCTGCTCTTGGCGCTCATCCTCCTGGCCACACAGCTGGTTTACCTCA  
AGCTCATCTTCTTCCGTCCACGACCGTCCGAAAGATGAAGCCCGTCCAGTTC  
GTGCCGGCCGTCAGCCAGAAGTGGACCTTCCACGGGCCGGGTGCCAGCGG  
GCAGGCGGCGCCAACTGGCTGGCCGATTTGGGAGAGGCCCCACCCCTC  
CTACCTTGTGGGCATCCGGCAGAACAGCAACCGCGCGGGCCGAGGCGT  
CTGCTGGTGTGGATGAGTTCAAACCGGAGAAGAGGATTAGTAGGATGTT  
CTACATCATGACGTTCTTCTTCCCTGGCCCTGTGGGGGCCCTACCTGGTAG  
CCTGCTACTGGCGGGTGTGTTGCCAGGGGTCCCGTGGTCCCCGGGGTTAC  
CTGACGGCAGCCGTGTGGATGAGCTTCGCCCAGGCCGGGTCAATCCCTT  
CATCTNNNNNNNNNNNNNNNNNNNNNGCCAAATCTCGCTTTCACCCCTGGCGTGGGGACTGGTCTTGGCAGC  
GACC---GCAGCGTCCCACTCAGCAACAGCTTGCTCTCCCCGCAACAAAC  
CGAAGAGCCCACTGTTG---CCTCCCCGACGATGGTTTGTACCC---  
CTGCCAACAACCGACTGGACTTCGCCGCATCGGCATACGATGCCGCT---  
-----GATTCGCCCGTAACGCAGCCACGTTACTGTCTACGCAGCGGC  
TGGAGTGAAGGCAC-----TTCCCTGCCGACCGCAGGTTGCTCCAACA  
GACCGCTTGGCTATTACGCGGACCCGTCGG---GCTGG---GGAGCGCGT  
ACGCCGCCGAGTACTGTAGT-----AGTAAATCGAGCTCGGTCTCTC  
TTGCTGGCCCACTAATTCGGTCCGTGGCAGAACAGGCA-----CTAACT  
ACCTGG-----CCGAGGA---CGGG---GACGC---CATCCCCACG  
GAAAGTCCCCG---AT---CGGTGGCGCGGAGGAG---ACGAAACCCAA  
AGACTT-----GTCCGA---ATCTAGCTGGATAGAA---ACGCCGTCTT  
CGATTAAGTCAATTGATTCAGCGATTCTGGGATCTTTG---AACAAAGCC  
AAGCGGAGAAGAATTCGCCTTCTGCCACACCA-----GTTTCAGA  
AATTGTGTCCCCGTTAAAATCTGAGNNNNNNNNNNNAGGCGAAGTCACAGATAGAGAAGTA  
GCGTTGGCGATAAATCCGTTCCGACAGCGGATGGGCGCCTTCAAGATTAA  
CCACAGCTCTACGATATTGGCTCCAG---ACAAACAGCGTTTTCTCC



AGGCG---CCCGGCTAC---GCGGCGGCTGCCCTGGGA---CACCATCA-  
-----CCACCCGACTCACGTTAGCTCT---TATTCCACAGCAGCGTTCAA  
TTCCACGCGGCACTTCTCTTTAGAAATCGGGGTTCGGAGACGCCACCA  
G-----TGCGCAGCACAGTTTGTTCGCCCTCCGC---CGCGGGA  
AGTTT---T-----GCAGGACCGCATGGACTCAGATGCCGCGGGACA  
CCTGCTCTTCCCAGGGCTACACGAA---CAAGCCGCGAGTCATGCGTCTT  
CTAACGTTGTCAACAGCCAGATGCGATTGGGCTTTTCCGGGGACATGTAC  
AGTCGGGCCGACCAGTACGGCCACGTTACAAGCCCGAGGT---CCGACCA  
CTATGCTTCGACCCAGTTGCACGGCTATGGCCCTATGAACATGAATATGG  
CCGCA---CATCACGGAGCAGGGGCCCTTCTTTCGTTACATGAGGCAGCCG  
ATCAAACAAGAGCTCATCTGCAAGTGGATCGAACAGAGCAACTGACGAA  
TCCCGAAAAGTCATGTAATAAAACTTTCAGTACGATGCATGAGCTAGTGA  
CCCATCTGACGGTGGAAACATGTGGGGGGACCCGAACAGTCAAACCACGTT  
TGCTTCTGGGAAGACTGTTCTCGAGAAGGAAAACCGTTCAAAGCCAAATA  
CAAACCTTGTTAATCATATCAGAGTACACACCCGGAGAAAAGCCGTTCCAT  
GTCCATTCCCCGGCTGTGGCAA

>Polymixia loweii

AGTCTCCTCATCCGGGCAGAACTAAGTCAACCCGGGGCCCTGCTAGGGGA  
TGATCAAATCTACAACGTCATTGTTACGGCACATGCCTTTTGTAATAATTT  
TCTTTATAGTAATAACCAATTATGATTGGTGGATTTGGTAACTGACTCATC  
CCACTAATGATCGGAGCACCCGATATAGCATTTCCTCGAATAAAACAACAT  
AAGCTTTTACTACTCCCCCTTCATTCCTCCTGCTATTAGCCTCTTCCG  
GCGTAGAAGCGGGGGCTGGTACAGGATGAACTGTATACCCACCCCTTGCA  
GGTAATTTAGCACACGCTGGTGCCTCAGTTGACTTAACCATTTTCTCCCT  
TCATTTAGCAGGTGTCTCCTCAATTCTTGGAGCCATCAACTTTATTACAA  
CTATTATTAACATGAAACCCCCAGCTATTTCCCAATACCAAACACCCTTG  
TTTGTATGATCAGTTTTAATTACCGCTGTTCTTCTACTGCTCTCCCTACC  
TGTCCTTGCAGCTGGCATTACCATGCTATTAACAGACCGAAATCTAAACA  
CCACCTTCTTTGACCCTGCTGGGGGAGGAGATCCTATTCTCTACCAACAC  
TTGTTCTGATTCTTTGGACACCCCGAAGTATATATTTTAATTTTACCAGG  
ATTTGGTATAATCTCCACATTGTTGCATACTATTCCGGCAAAAAAGAAC  
CCTTCGGTTATATGGGAATGGTCTGAGCTATAATGGCCATTGGACTACTT  
GGATTTATCGTGTGAGCCACCACATGTTTACCGTCGGTATGGACGTGGA  
CACACGAGCTTATTTCTGGAGAGGAACCTCCACCCATCCAACCTGCCCTGGG  
CATGCTGTTGCTGTCTGATGCCCACAGTGTACCAAATTTATCAGAGCTCT  
CCTGGGGCATGTGCCCTCAGCAACTTCCCTGCTATTTGCAAGACAGAAGAC  
TTCTCCAACCTGCCAAAGACATGGTGGTGCAGCTTCTGTCTCACGAGGA  
GCTGGAGACAGAAGATGAAAGACTGGTTTATGAGGCTGCTCTTAACTGGG  
TCAACTATGACCTGGAAAGGAGGCAC TGCAACCTTCCAGAGCTGTTGAGA  
ACAGTTCGCCTGGCACTGCTTCCCTGCCATCTTCCCTTATGGAGAATGTCTC  
CACAGAAGAGCTGATCAATGCCAGGCCAAGAGCAAGGAGCTGGTGGATG  
AGGCCATCCGCTGCAAGCTGAAGATCTTGCAGAATGATGGTGTGGTTAAC  
AGCCCTGTGCCCGGCCAAGAAAACCAGCCACGCTCTCTTTCTGCTGGG  
AGGGCAGACCTTCATGTGCGACAAGCTGTACCTGGTGGACCAGAAGGCCA  
AAGAGATCATCCCCAAGGCTGACATCCCCAGCCCCAGGAAGGAGTTCAGC  
GCCTGCGCCATCGGCTGCAAGGTTTACATCACAGGCGGGA--GAGGCTC-  
AGAGAATGGCGTGTGCAAAGACGTTGGGTCTATGATACCGTCCACGAGG  
AATGGTCCAAGGCGGCGCCCATGCTCATTGCCAGGTTTGGTACGCGGTCT  
GCCGAGCTGAAACACTGCCTCTATGTGGTGGGAGGACACACAGCAGCGAC  
CGGCTGTCTTCCCTGCCTCTCCCTCCGGATAATTACATTTGTAGTGTTCAGT  
CGTTCAACAACAAGGCTGATTCTGAACGAAGTGGAGCTGATCATGTGCT  
GGCCAGGAGTTTCAAATGAGAGTAGTCACAGTCTCCCTGGAGGAGCAAT  
CTTTCCCCAGCATTGTCCAGCTGATCAGCAGAGCCTCCATGTTAGTGAGC

ATGCATGGAGCTCAGCTTGTACCTCGCTGTTCCCTGCCGAGAGGAGCTGC  
TGTGGTGGAGCTGTTCCCGTACGCTGTGAACCCAGAACAGTACACTCCAT  
ATAAGACCCTTGCCCTCCCTACCAGGCATGGACCTGCAATATGTTCCCTGG  
AGGAACACGATGGAGGAGAACACTGTCACCCACCCAGACAGACCCTGGGA  
CCAAGGGGGCATTGCCACCTGGAAAAGCAGGAGCAAGAACGAATACTTG  
CCAGCAAAGATATTCGAGGCACCTGTGTTGCCGAAACCCAGAGTGGCTC  
TTTCGAATCTACCAGGACACTTTGGTGGACATCCCTTCATTCTGGAAGT  
CCTCAA---AGAGGGCTTAAAG---ACCAGGCCAGCTTGAAGAA---GT  
CCAAGCCAGCCAGCACAGTTCATCCAGGCCGGGTCAGAGAACCCCAATGC  
CAGACTTCAGTCCAAGCCACAAATGAGGCTAAGCTTACAGTCTCCTGGCA  
GATCCCCTGGAATCTGAAATATCTGAAGGTGAGAGAAGTGAAGTACGAAG  
TG-----AAGAAGGATGCCAGCAAAGGAACTGGAGGATCAAATC  
ATCCAGGCCAACCCCTGCACTGGAGGCCTTTGGTAATGCCAAAACAGTTAG  
GAATGATAACTCCTCCCGTTTTGGAAAATTCATCCGAATTCACTTTGGAA  
ACAGTGGCAAGCTGTCTCTGCTGACATTGAGACTTACCTGCTGGAGAAG  
TCACGTGTCACCTTTCAGCTTAAATCTGAGAGGAACTAYCACGTCTTCTT  
CCAGATCTTGTCCAATCAGAAGCCAGAGCTGCTGGACATGTTGCTGATCA  
CCAACAACCCGTACGATTACTCCTTCATCTCCCAAGGAGAGGTGACAGTA  
GCATCCATCAACGACTCAGAGGAGCTGTTAGCCACTGACAGCGCCTTTGA  
TGTGCTTGGCTTCACTCAGGAGGAGAAGATGGGAGTGTACAAGTTGATTG  
GTGCCATTATGCACTACGGCAACATGAAGTTCAAACAGAAGCAGCGTGAA  
GAGCAGGCTGAACCTGATGGAACCTGAGGCTGCTGATAAGTCAGCTTACCT  
GATGGGGCTGAACTCTGCAGACCTTATCAAAGGACTGTGTATCCAGAG  
TCAAAGTAGGAAATGAATATGTCACCAAAGGTCAAGGTGTAGACCAAGTC  
TACTACCCCAACAAGGAGGCCTTCAAGTGCAGGAGTGCAGGAAAGCACTA  
CAACACCAAGCTGGGCTACAAGCGCCATGTGGCCATGCACTCTGCCACGG  
CGGGGGACCTCACCTGCAAGGTGTGCATGCAGAGCTACGAGAGCACGCCG  
GTGCTCCTGGAGCACCTGAAGAGCCACTCGGGGAAGTCCACGGGCGGCGC  
CAAGGAGAAAAAGCACCCGTGCGATCACTGCGACCGTTCGCTTCTACACCC  
GGAAGGATGTGAGGCGGCACATGGTGGTCCACACGGGCCGAAAGGACTTC  
CTGTGCCAGTACTGCGCCAGCGCTTTGGCCGGAAGGACCACCTGACGCG  
CCACGTCAAGAAGAGCCACTCGCAGGAGTTGCTGAAGATCAAGACGGAGC  
CTCCGGACATGTTAGGTCTCCTAGGTTCTGGCTCTCCGCCTTGCTCTGTC  
AAGGAGGAGCTTAGCCCTATGATGTGCAGCATGGGTCCCAACAAGGACCC  
CATGATGGGCAAACCCCTTCCCAGTGGGACCCCTTCCCATGGGCATGT  
ACAACCCCAACCAC-----CTCCAGGCCATGTCCAACCTCTGGGGTGGGT  
CACCC-----CACCCCTCCCTGATGTCTAGTTTCGCTCTCTGCAGCCAT  
GGGCATGGGCTGTACATGGAATATCTCATCTACGCTTCTTCTCTCTTCA  
TGGGATGTTTACAAATCAGTGACGGATCAAACATCGTGAATTTGCTGGCT  
AGTAACTCTCCGAGTGTTCGTACGCGCTGACCCAGCAGAAGTACTTTAG  
TAACTACAGTCCCCTGATTGGGTTCTACATTTATGAGCCTATTGAATACT  
GGAACTCCACGGTGCAGGAGCACCTGAAGACACTGAGCCACGGCTTCAAC  
AAGATCTCCTGGATGGACAACCTTCTATCACTACCTGCGGGTGGTGAAYGT  
GAGCGCGTCCACAAAGAATGACTTCATTACCATCCTCAAGGGCTCCTTCT  
TACGCAGCCCGGAGTACCAGCACTTACCAGGACATCATCTTCTCCAAG  
A---ACCGTGAAAGTG-----ACGAGTATGACATTTATCGCCTCACGGAT  
GTACCTGGTGGCGCGGACCACGGAGAAGAAACGCGAGGAGGTGGTGGAGC  
TTCTGGAGAAGTTGCGACCACTGATGCTGATCAACAGCATCAAGTTCATC  
GCCTTCAACCCACCTTTGTGTTTTCATGGACCGTTATAGCTCCTCGGTAAT  
ATCGCCATCCTGACCTCGGGCTTTAGCGTGCTCACTATTCTCATCCTCA  
CCTTCTTCTGGTCAATCAACCCCTTGGGGAACCTTCTGGCTCATCCTAACG  
GTCACCTCTGTGGAGTTGGGCGTGCTGGGTTTAAATGGGCTATTACCCGTT  
CGAGTGGCAGCCGGCCCTCAGAAACGTGTCCGAGTCTGCCACGTGGGCA



```
-----  
-----  
-----  
-----  
-----  
-----  
-----  
-----  
-----  
-----  
-----  
-----GCCAAATCTCGCTTT  
CACCTGGCGTGGGGACCGGTCTGCGACGACCGACC---GCAGCGTCCCCT  
CAGCAACAGCTTGCTCTCCCCGCAACAACCGAAGAGCCCACTGTCG---  
CCTCCCCGAGCGATGGTTTTGTACCC---CTGCCAACACCGACTGGAC  
TTCGCCGCATCGGGGTACGACGCCGCC-----GACTTCGCCGGTAA  
CGCGGCCACGTTGCTGTCCTACGACGCGGTGGAGTGAAGGCGC-----  
TTCCCCTGGCAGCCGAGGTTGCTCCAACAGACCGCTTGGCTATTACGCG  
GACCCGTCGG---GMTGG---GGAGCGCGTACGCGCCGCGAGTACTGTAG  
C-----AGTAAATCCAGCTCGGTCTCTCTTGCTGGCCCACTAATTCGG  
TCGGCGGCAGAACAGGCA-----CTAACTACCTGG-----CCGAG  
GA---CGGG---GACGC---CATCCCCACGAAAGGTCCCCG---AT---  
CGGCGGCAGGAGGAG---GCGAAACCCAAAGACTT-----GTCCGA--  
-ATCTAGCTGGATAGAA---ACGCCGTCTTCGATTAAGTCGATCGATTCT  
AGCGATTCTGGGATCTTTG---AGCAAGCCAAGCGGAGAAGAATTCGCC  
TTCTGCCACGCCA-----GTTTCAGAAATTGTGTCCCCGNNNNNNNNNNNNNNCACTACT  
CAACAGGCGAAGTACAGAAAGAGAAGTAGCGTTGGGGATAAAATCCGTTTC  
GCAGACGGGATGGCGCCTTTCAAAATTAACACAGCTCTCACGACATTGG  
CTCCCG---ACAAACAGCGTTTTTCTCCAGGCG---CCCGGCTAC---G  
CGGCGGCTGCCCTGGGA---CACCATCA-----CCACCCGACCCACGTT  
AGCTCT---TATTCCACGGCGGCTTTCAATTCCACACGGGACTTTCTCTT  
CAGAAATCGGGGTTTCGGAGACGCCACCGAG-----CGCGCAGC  
ACAGTTTGTTCGCCTCCGC---CGCGGAAGTTT---T-----GCAGGG  
CCACATGGACACTCAGATGCCGCCGACACCTGCTCTTCCCGGGGCTACA  
CGAA---CAAGCGGCGAGTCATGCGTCTTCTAACGTCGTCAACAGCCAGA  
TGGCATTGGGCTTTTCCGGGGACATGTACAGTCGGGCGACCAGTACGGC  
CACGTTACGAGCCCCGAGGT---CCGACCACTACGCCCTGACCCAGTTGCA  
CGGCTATGGCCCTATGAACATGAATATGGCCGCA---CATCACGGAGCAG  
GGCCTTCTTTTCGTTACATGAGGAGCGGATCAAACAAGAGCTCATCTGC  
AAGTGGATCGAACCAGAGCAACTGACGAATCCCAAAAAGTCGTGTAATAA  
AACTTTCAGTACGATGCATGAGCTAGTGACCCACCTGACGGTGGAGCATG  
TGGGGGACCCGAGCAGTCGAACACGTTTGCTTCTGGGAAGACTGTTCT  
CGAGAAGGAAAACCGTTCAAAGCCAAATACAAACTGTAAATCATATCAG  
AGTACACACCCGAGAAAAGCCGTTTCGCTGTCCATCCCCGGCTGTGGCA  
AA
```

>*Porichthys notatus*

```
AGCCTCTTAATCCGAACAGAACTAACGCAGCCCCGGTCTCTACTCGGCAA  
TGACCAAATCTATAACGTAATCGTCACTGCCACGCATTCGTCATAATCT  
TCTTTATAGTAATGCCTATTATAATCGGGGGCTTTGGTAAGCTGGCTTATC  
CCCCAATAATCGGGGCCCCAGATATAGCATTCCCTCGTATAAAATAACAT  
AAGCTTTTACTTCTCCCCCTCTTTCCTTCTTCTTTTACGCTCTTCCG  
TCGTTGAGACCGGAGTTGGAACCGGCTGAACTGTATTATCCCCCTCTAGCT  
GGCAACTTAGCCACGCAGGGGCTTCTGTTGACCTCGCCATTTTTTCTCT  
CCATCTTGACGGCATTTTCCTCTATTTTAGGGGCTATTAACCTTTACTA  
CCATTATTAATAAAAAACCCAGCTTCCACACAATACCAAAACCCCTTA  
TTTTATCTGAGCTACTTTAGTTACCGCTGTCCTTCTTCTATTATCCCTACC  
TGTATTAGCAGCCGCACTACTATGCTACTAACAGACCGTAACCTAAACA
```

CCACCTTTTTTGACCCCGCAGGTGGAGGAGACCTATCCTTTACCAACAC  
CTATTCTGATTCTTCGG-----  
-----  
-----  
-----

-----TTCTAGAAAGAAACCTTCATCCGTCCAACCTGCCTCGG  
CATGCTTTTTGCTGTCTGATGCCACCAGTGTACCAAGCTGTCAGAGCTGT  
CCTGGGGCATGTGCCCTCAGCAACTTCCCTGCTATTTGCAAGACAGAGGAC  
TTCTTCAGTTACCCAAAGATATGGTGGTGCAGCTTTTATCCCACGAGGA  
GCTRGAAACAGAAGATGAGAGACTGGTTTATGAAGCTGCCCTGAACTGGA  
TCAACTATGACCTAGAGAGGAGACACGACCACCTTCCAGAGCTTCTGAGA  
ACAGTCCGCCTAGCTCTGTTGCCCGCCATCTTTCTCATGGAGAATGTGTC  
GACGGAAGAGCTTATCAATGCCCAGACCAAAGCAAGGAGCTGGTGGACG  
AAGCCATCCGTTGTAAGCTGAAGATCCTGCAGAACGATGGYGTGTTAAC  
AGTCCGTGTGCCCGGCCGAGAAAAACCAGCCATGCCCTGTTTCTTCTGGG  
AGGCCAGACCTTTATGTGTGACAAGTTGTAAGTGGTGGATCAGAAAAGCCA  
AAGAAATCATCCCAAAGGCYGACATCCCCAGTCCGAGGAAGGAGTTCAGT  
GCCTGYGCCATTGGCTGTAAGGTCTATATCACTGGGGGCA--GAGGYTC-  
AGAGAACGGGGTATCGAAAGATGTCTGGGTCTACGACACTGTCCATGAGG  
AATGGTCCAAGGCAGCGCCCATGCTCATTGCCCGGTTTGGCCACGGCTCT  
GCAGAGTTAAAACACTGCCTCTATGTGGTAGGAGGTCATACTGCAGCAAC  
TGGGTGCCCTCCAGCGTCCCGTCCAGATGAATACGTTGTTGTGTTTAGT  
CGCTCTACCACCAGACTGATAGTGAATGAAGCTGAGTTCATCATGGCTCT  
CGCGCAGGAGCTTCAGATGAGAGTGGTTACGGTGTCCCTGGAGGAACAGC  
CTTTCCCAGCATTGTCCAGGTGATCAGCGGTGCATCAATGTTGGTTAGC  
ATGCACGGAGCACAGCTCATTACGTCCCTCTTCCCTCCCAGAGGAGCTGC  
TGTGGTTGAGTTGTTCCCCTTTGCTGTCAACCCAGAGCAGTATACCCAT  
ATAAAACCCTGGCCTCCCTCCCAGGCATGGACCTCCACTACATCTCCTGG  
AGGAACACTATGGAGGAGAACACAGTCACCCACCCGAGAGATCCTGGGA  
ACAGGGAGGTATCGCTCACCTGGCRAAGGAGGAGCAAGAGCGAATACTGG  
CTAGCAAAGATGTTCCGAGGCACCTGTGCTGCCGCAACCCAGAGTGGCTC  
TTCCGAATCTACCAGGACACGCTGGTGGACATTCTTCTTTTCTAGAAAGC  
CCTCCG---AGAAGGCTTAAAG---ACGAAGCCCAATCTGAAGAA---GK  
CAAAGACAGCCAGTATGGTCCATCCTGGCCGGGTCAGGGAAGCCAGTGT  
CAGACGTCGTGCAGACCAGCAGCGAGGCCAAACTCACCGTGTCTGGCA  
GATCCCATGGAACCTCAAGTACCTGAAGGTGAGAGAGGTTAAGTACGAGG  
TGTGGATCCAGAAAAAGACGCCAGCAAGGAGACGCTGGAAGATCAAATC  
ATTCAGGCGAATCCTGCACTCGAAGCCTTTGGTAATGCCAAGACGGCAAG  
AAACGATAACTCTTCTCGTTTTCGGAAAATTCATCAGAATTCACTTTGGAA  
CCAGTGGTAAACTCTCCTCTGCAGACATCGAGACATACCTGCTGGAGAAG  
TCACGTGTCACCTTTCAGCTCAAGGCTGAGAGGAACCTACCACATCTTCTA  
CCAAATCCTGTCCAATCAGAAGCCAGAGCTGCTCGACATGCTACTGATCA  
CCAACAACCCATACGACTACATCTACATCTCCCAAGGAGAGGTAACGGTG  
GCATCCATTGATGATTCAGAGGAGCTGATGGCCACAGACAACGCCTTCGA  
TGTGCTCGGCTTCACTCCAGAGGAGAAGATGGCCGTCTACAAGCTGATTG  
GCGCCATCATGCACTACAGTAACATGAAGTTTAAAGCAGAAGCAACGTGAG  
GAGCAGGCTGAACCTGATGGGACCGAGGCGGCAGATAAGTCGGCATACTT  
AATGGGGCTGAACTCTGCTGACCTCATTAAGGGCTGTGCCATCCCCGGG  
TCAAGGTAGGAAATGAGTATGTCACCAAAGGGCAAAGTGTGGACCAGGTC  
TACTATCCTAACAAGGAGGCCTTCAAGTGTGAAGAGTGTGGGAAGCACTA  
CAATACCAAGCTGGGATATAAGCGCCATGTGGCCATGCACTCAGCCACAG  
CAGGAGATCTCACCTGCAAAGTGTGTATGCAGAGCTATGAGAGTACACCA  
GTGCTCCTAGAGCACCTGAAGAGCCACTCGGGGAAATCCTCAGGTGGCAC

CAAGGAGAAAAACACCCGTGTGATCACTGTGATCGCCGTTTTTACACAC  
GAAAGGATGTGCGACGACACATGGTGGTGCATACGGGCCGGAAGGACTTC  
CTGTGCCAGTACTGCGCTCAGCGCTTCGGAAGGAAGGACCATCTGACACG  
TCATGTAAAAAAAAGCCACTCGCAAGAGCTGCTGAAGATCAAGACAGAGC  
CACCTGATATGTTAGGTCTTTTAGCTTCGGGCTCACCACCTTGCTCAGTG  
AAAGAGGAGCTTAGCCCCATGATGTGCGGCATGGGTGCCAACAAAGACCC  
CATGATGGGAAAATCGTTCCCCAGYGGCGCCCTTTTCACATGAGCATGT  
ACAACCCTCATCAT-----CTCCAGGCCATGTCTAATTCTGGGGTCAGT  
CATTCA-----CATCCATCTTTGATGCCAGTTTCGCTGTCTGCAGCTAT  
TGGCATAGGCTGTCACATAGATTACCTCATCTACGCGTCTTTTTCTTTCA  
TGGGATGTTTACAGATCAGCGATGGGTCCAACATCGTAAACCTGTTAGCT  
AGCAACTCTCCGAGCGTTTTCGTACGCCCTCACCCAGCAGAAGTACTTCAG  
CAACTACAGTCCTGTGATTGGATTTTACATTTACGAACCCATTGAGTACT  
GGAACTCCACGGTGCAGGAGCACCTGAAGACTCTGAGCCACGGCTTCAAC  
AAGATCTCCTGGATGGACAACCTTCTTCCACTACCTGCGTGTAGTGAATGT  
GAGCGCGTTCGACCAAGAGCGACTTCATCACCATCCTCAGAGGCTCATTCT  
TGCGCAGCCCGGCATACCAGCATTTCACAGAGGACATCATATTTCTCGAAG  
A---ATCGGGAGACTG-----ACGAGTATGACATCATCGCCTCGCGCAT  
GTACTTGGTAGCTCGGACCACGGAGAAGAAGCGCGAGGAAGTGGTGGAGC  
TTCTGGAGAAGCTTCGCCATTGATGCTCATCAACAGCATCAAGTTCATT  
GCCTTCAATCCACGTTTGTGTTTCATGGATCGCTACAGTTCTTCAGTCAT  
CTCGCCATCCTGACCTCAGGCTTCAGTGTGCTCACCATCCTCATCCTCA  
CATTCTTCTGTCATCAACCCATTGGGGAACCTTCTGGCTCATCCTGACA  
GTTACGTCCTGAGCTTGGGGTCTTGGGTTTGATGNNNNNNNNNNNNNNNNNN  
NNNNNNNNNNNNNNNNNNCTTGAATGTTGGC  
ATTATTAATGGGCTTCTGTTAGGGCATCCTCCGTGGATGACATCCCAGT  
CGACACCATCACTCGAAGATTTTCGATATGATGTGGCACTGGTATCAGCAT  
TAAAAGACCTAGAGGAGGACATCATTGAGGGTTGACTGAGTGTGGAATG  
GAAGACAGYGCTTGCACCTCAGGCTTCAGCGTCATGATCAAAGAATCCGG  
TGACGGCATGGGCGACGTTCAGCGAGAAACACGGAGGAGGACCTGCGGTTT  
CTGAGAAGGCGGTACGTTTTTCACTTACTATTATGTCTATCTCCATCCTG  
GCAGATGGCGAGGAA-----AAGCC  
AGTTACCATCTATACTGAGCCAAAGCCAAACTCCGAACGTGCATGTAAGC  
CCCTTGTCTGATGTTTGTGATGAATCAGACCATGAAACACTCACAGCT  
GTCCTGGGGCCGATGTCGCCGAGCGTGAAGCAATGAAAGACAGCAGACT  
CATTCTGTCAATGGGTGGCTTGCCCTCGCTCCTTTCGCTTCCACTCAGAG  
GCACAGGATATGATGAGAAGATGGTACGTGAAGTGGAGGGCCTGGAGGCC  
TCAGGTTCCAGTTATATCTGCACGCTGTGTGACTCCACTCGGGCAGAGGC  
CTCTCAMAATATGGTACTGCATGCCATTACCCGCGGCCATGAAGAGAACC  
TGGAGCGTTACGAAAATATGGAGAACTAATCCCTTTTCAGAGTCTGTGAT  
GAGCTGCGGGACCGTGTCAAAGGGTCTCTGCCAAACCCTTTATGGAGAC  
CCATGCCACAATGGATGCATTACACTGTGACATTGGCAATGCCACTGAGT  
TCTACAAAATTTTTCAAGATGAGATTGGGGAGGTGTACAAAAAGT---C  
AAC---CCCACCCGTGAGGAACGGCGTAGCTGGAGAGCAGCCCTAGATAA  
ACARCTGAGGAAAAAATCAAGCTAAAACCAGTAATGAGGATGAATGGGA  
ACTATGCCCGGAAGCTAATGACCATGGAGGCAATGGAGGCGGTGTGTGAA  
CTGGTACCCACCGAGGAGAGGAGAGAAGGCTTGATGGAGCTTATGAGCCT  
CTACATCCAGATGAAGCCTGTCTGGCGTTCCTCCTGTCCAGCCAAAGAAT  
GCCCTGACCAGCTGTGCCGCTACAGCTTCAACTCCCAGCGCTTTGCTGAC  
CTCCTGTCCTCCACATTTAAATATCGGTACAATGGAAAGATCACCAACTA  
CCTTCACAAAACGCTGGCTCAGGTCCCTGAAATCGTCGAACGAAAATGGGT  
CTATCGGAGCCTGGGCCANNNNNNNNNNNNNNNNNNNNTCATACTATTGAAATGTGTCCCTT  
GGGGCC

AAGATGGAAGGAGAATCCACATCCTTTCTCTTGCTCCATTGAAGATCCTA  
CAAAACAGACAAAGTTTAAAGGCATCAAAACGTACATTTTCGTACCGGGTC  
ACACCGAGCCACACAGGGCGTCCCGTCTACAGACGCTACAAACACTTTGA  
CTGGCTATAACAACCGTTACTGCACAAGTTCACTGTGATCTCTGTGCCTC  
ATCTTCCAGAGAAACAGGCCACTGGGCGATTTGAGGAAGACTTCATCGAG  
AAGCGGAAGAGGCGATTGGTACTGTGGATGAACCATATGACTACTCACCC  
GGTCTTTTCGCAATACGAAGGCTTTGAGCACTTTCTCATGTGTGCTGATG  
ATAAGCAATGGAACTGGGCAAGAGACGGGCAGAGAAGGATGAGATGGTG  
GGTGCCCATTTTCATGCTAACCCTCCAGATTCCAAAATGAGCACCAAGACCT  
TCAGGATGTAGAAGAGCGAGTTGATTCCCTTCAAGACATTTGCTAAGAAAA  
TGGATGATAGTGTATGCAGCTCACACATGTTACCTCGGAGCTGGTGCGC  
AAGCACCTTGGCGGATTTTCGGAAGGAGTTCCAACGGCTAGGAAATGCCTT  
CCAGTCTATCAGCCAGGCATTCATGCTGGACCCTCCCCATTGCTCAGAGC  
CTCTCAATCAAGCCATCTCTCATNNNNNNNNNNNNNNNNNCTCAAACGACCTCTCTGGGTTTCATC  
ATCGGCGTTCGGCGTGGTTCGGAACCTCCTGATTTCCATCCTKCTGGTTAA  
AGACAAGAGCCTGCACCGGGCGCCGTACTACTTCCCTGCTGGACCTGTGCG  
CTTCCGACATCCTGCGCTCGGCCATCTGCTTCCCCCTTCGTCTTCACCTCG  
GTCAAGAATGGCTCCGCTGGAGTTACGGCACGCTCACCTGCAAAGTGAT  
CGCCTTCCCTGGGCGTGTCTCTCTGCTTCCACACGGCGTTCATGCTATTCT  
GCGTTAGCGTCACCCGCTACCTAGCCATCGCGCACCCACCGCTTCTACACC  
AAGCGCTTGACCTTCTGGACGTGCCTAGCCGTCATCTGCATGGTGTGGAC  
GCTGTTCGGTGGCCATGGCKTTCCCGCCGGTGGTGGACGTGGGGACGTACT  
CGTTTATCCGCGAGGAGGACCAGTGCACGTTCCAGCACCGCTCGTTCCGG  
GCGAACGATTCCTCGGCTTCATGCTCCTGCTGGCGCTAATCCTCCTAGC  
CACACAGCTGGTTTACCTCAAGCTTATCTTCTTCGTYCACGACCGTCGAA  
AGATGAAGCCCGTCCAGTTTGTGCCTGCCGTCAGCCAGAAGTGGACTTTC  
CACGGTCCGGGCGCTAGCGGCCAAGCGGCNGCTAACTGGTTAGCTGGCTTC  
GGTAGAGGCCCCACCCCGCTACTTTGCTAGGCATCCGGCAGAACAGCAA  
CGCGGCGGGTTCGAGGCGTCTRCTGGTGTGGATGAGTTTAAAACGGAGA  
AGAGGATTAGTAGGATGTTCTACATCATGACGTTTTTCTTCTGCTCTG  
TGGGGGCCCTATCTTGTGCGCTGCTACTGGCGGGTTTTTTCGAGGGGCC  
CGTGGTCCCCGGAGGGTATCTGACGGCSGCCGTGTGGATGAGCTTTGCC  
AAGCCGGGGTCAACCCTTTCATCNNNNNNNNNNNNNNNNNNNGCCAAATCTCGCTTTCCTCTGGCGT  
G  
GGGACTGGCCCTGGCACGGAGC---GCAGCGTCCCACTCGGCAACAGCTT  
GCTGTCCCCGCACCAAACCGAGGACCCACTGTTGCCTCCCCCCCGCAGC  
GATGGTTTGTACCC---CTGCCAACAACCGACTGGACTTCGCGGCCCTCA  
GCATACGATGCGGCT-----GATTTCCGCCGTAACGCGGCCACCTT  
GCTGTCTACGCAGCGGCTGGAGTGAAAGCTC-----TTCCCATGTCCG  
CGGCGGGCTGTCCAGCCGGCCTCTGAGCTACTACGCGGACCCGTCG--  
-GCTGG---GGAGGACGCACGCCGCCGAGTACTGCGGCGTCAACAACAA  
ATCCAGCTCGGTGTTCCCCTGCTGGCCCCGCTAACTCCATCGGCGGCAGAA  
CGAGCG---CC---AACTACCTGA-----GCGAGGA---GGTG---  
GACTC---CATCCCCACGGAGAGGTCACCG---AT---CGGCGGCTCCGA  
GGAC---GCCAAACCCAAAGACGT-----GTCCGA---GTCCGAGCTGGA  
TAGAGACCACGCCCTCCTCCATTAAGTCCATGGACTCCAGCGATTCTGGG  
ATCTTTG---AACAAATCCAAGAGGAGACGGATCTCACCGTCGGCCACGCC  
C-----GTGTCCAGAGACCGTGTCCCCGCTCAAGTCTGAGCATCACT  
CAACAGGCGAAGTCAAGAGAGAGAAGTGGCGTTGGGGATCAATCCGTTT  
GCCGATGGGATGGGCGCCTTCAAAAATCAACCACAGCTCCCACGACATCGG  
CTCCGG---ACAGACCGCCTTCTCCTCCCAGGCG---CCCGGCTAC---G  
CGGCGGCCGCGCTGGGA---CACCATCA-----CCACCCGACCCACGTT  
GGCTCC---TACTCCACGGCGGCTTTCAACTCCACCAGGGACTTTCTCTT

CAGAAATCGGGGTTTCGGGGACGCCGCGG-----CGCGCAGC  
ACAGTTTGTGTTGCCTC-----TGGGAGTTT---C-----GCAGGG  
CCGCATGGACACTCGGATGCAGCGGGGCACCTGCTCTTCCCGGGGCTGCA  
CGAG---CAAGCGGCCGGGCACGCGTCCTCCAACGTGGTCAACAGCCAGA  
TGCGGCTCGGCTTCTCGGGGGACATGTACGGCCGAGCCGATCAGTACGGC  
CACGTTACCAGCCCGCGGT---CAGACCATTATGCATCGACCCAAC TGCA  
CGGCTACGGCCCCATGAACATGAACATGGCCGCG---CACCACGGCGCGG  
GGGCTTCTTCCGATACATGAGGCAGCCCATCAAACAAGAGCTCATCTGC  
AAGTGGGTGAGCCGGAGCAGCTGGCGAACCCCAAAAAGTCGTGCAACAA  
AACTTTTAGTACCATGCACGAGTTGGTGACCCATCTGACGGTGGAGCAG  
TGGGGGGCGGAGCAGACGAACCACATCTGCGTCTGGGAGGACTGCTCC  
AGAGAGGGGAAGCCCTTCAAAGCCAAATACAAACTTGTAATCACATCAG  
AGTGACACCCGAGAAAAGCCATTTCCGTGCCCGTNNNNNNNNNNNNNNNNN

>Porichthys plectrodon

-----  
-----  
-----  
-----  
-----  
-----  
-----  
-----  
-----  
-----  
-----  
-----  
-----  
-----  
-----  
-----  
-----  
-----  
-----  
-----  
-----

-----TTCTAGAAAAGAACCTTCATCCGTCCAAC TGCCCTGG  
CATGCTTTTGCTGTCTGATGCCACCAGTGTACCAAGCTGTCAGAGCTGT  
CCTGGGGCATGTGCCCTCAGCAACTTCCCTGCTATTTGCAAGACAGAGGAC  
TTCTTCAGTTACCCAAAGATATGGTGGTGCAGCTTTTATCCCACGAGGA  
GTTGAAACAGAAAGATGAGAGACTGGTTTATGAAGCTGCCCTGAACTGGA  
TCAACTTTGACCTAGAGAGGAGACACGACCACCTTCCAGAGCTTCTGAGA  
ACAGTCCGTCTAGCTCTGTTGCCCGCCATCTTCTCATGGAGAATGTCTC  
GACAGAAGAGCTGATCAATGCCCAGACCAAAGCAAGGAGCTGGTGGACG  
AAGCCATCCGTTGTAAGCTGAAGATCCTGCAGAACGATGGCGTCGTTAAC  
AGTCCGTGTGCCCGGCCGAGAAAACCAGCCATGCCCTGTTCCCTTCTTGG  
AGGCCAGACCTTTATGTGTGACAAGTTGTAAGTGGTGGATCAGAAAGCCA  
AAGAAATCATCCCAAAGGCCGACATCCCCAGTCCGAGGAAGGAGTTCAGT  
GCCTGCGCCATTGGCTGTAAGGTGTATATCACTGGGGGCA--GAGGCTC-  
AGAGAACGGGTATCTAAAGATGTCTGGGTCTACGACACTGTCCATGAGG  
AATGGTCCAAGGCAGCGCCCATGCTCATT-----

-----GGACGAATACGTTGTTGTGTTTGTAGT  
CGCTCTACAACCAGACTGATAGTGAATGAAGCCGAGCTCATCATGGCTCT  
CGCTCAGGAGCTTCAGATGAGAGTGGTTACGGTGTCCCTGGAGGAACAGT  
CTTTCCCGAGCATTGTCCAGGTGATCAGTGGTGCATCAATGTTGGTTAGC  
ATGCACGGAGCTCAGCTCATTACGTCCCTCTTCCCTCCCCAGAGGAGCTGC  
TGTGGTTGAGTTGTTCCCTTTGCTGTCAACCCAGAGCAGTATACACCAT  
ATAAAACCCTGGCCTCCCTCCCAGGTATGGACCTCCACTACATCTCCTGG



AGGAACACTATGGAGGAGAACACAGTCACCCACCCAGAGAGATCCTGGGA  
ACAGGGAGGCATCGCTCACCTGGCGAAGGAGGAGCAAGAGCGAATACTGG  
CTAGCAAAGATGTCCCGAGGCACCTGTGCTGCCGCAACCCAGAGTGGCTC  
TTCCGAATCTACCAGGACACGCTGGTGGACATTCTTTCTTTCATGGAAGT  
CCTCAG---AGAAGGCTTAAAG---ACAAAGCCCAATCTGAAGAA---GA  
CAAAGACAGCCAGCATGGTCCATCCTGGCCGGGTCAGGGAAGCCAGTGT  
CAGACGTCTGTGCAGACCAGCAGCGAGGCCAAACTCACCGTGTCTGGCA  
GATCCCGTGGAACTCAAGTACCTGAAGGTGAGAGAGGTTAAGTACGAGG  
TGTGGATCCAGAAAAAGACACCAGCAAGGAGACACTGGAAGATCAAATC  
ATTAGGCGAATCCTGCACTCGAAGCTTTTGGCAACGCCAAGACGTAAAG  
AAACGATAACTCTTCCCGTTTGGAAAATTCATCAGAATTCACTTTGGAA  
CCAGCGGTAAACTCTCCTCTGCAGACATCGAGACATACCTGCTGGAGAAG  
TCACGTGTACCTTTCAGCTCAAGGCTGAGAGGAACTACCACATCTTCTA  
CCAAATCCTGTCCAATCAGAAGCCAGAGCTGCTCGACATGCTCCTGATCA  
CCAACAACCCATACGACTACTCCTACATCTCCCAAGGAGAGGTAACGGTG  
GCCTCCATTAATGATTCAGAGGAGCTGATGGCCACAGACAATGCCTTCGA  
TGTGCTCGGCTTCACTCCAGAGGAGAAGATGGCCGTCTACAAGCTGATCG  
GCGCCATCATGCACTACGGTAACATGAAGTTTAAAGCAGAAGCAACGTGAG  
GAGCAGGCTGAACCTGATGGGACCGAGGCGGCCGATAAGTCGGCATACTT  
AATGTGGCTGAACTCCGCTGACCTCATTAAGGGCTGTGCCATCCCCGGG  
TCAAGGTAGGAAATGAGTATGTCACTAAAGGGCAAAGTGTGGACCAGGTC  
TACTAT-----GGGAAGCCTTCAAGTGTGAAGAGTGTGGGAAGCACTA  
CAATACCAAGCTGGGATATAAGCGCCATGCGGCCATGCACTCAGCCACAG  
CAGGAGATCTCACCTGCAAAGTGTGTATGCAGAGCTATGAGAGTACACCA  
GTGCTCCTAGAGCACCTGAAGAGCCACTCGGGGAAATCCTCAGGTGGTGC  
CAAGGAGAAAAAACACCCGTGTGATCACTGTGATCGCCGTTTTTACACAC  
GAAAGGATGTGCGACGACACATGGTGGTGCATACGGGCCGGAAGGACTTC  
CTGTGCCAGTACTGTGCTCAGCGCTTCGGAAGGAAGGACCACCTGACACG  
TCATGTGAAAAAAGCCACTCGCAAGAGCTGCTAAAGATCAAGACAGAGC  
CACCTGATATGTTAGGTCTTTTAGCTTCGGGCTCACCACCTTGCTCAGTG  
AAAGAGGAGCTTAGCCCCATGATGTGCGGCATGGGTGCCAACAAAGACCC  
CATGATGGGTAAACCGTTCCCGAGCAGCGCCCTTTTCACATGAGCATGT  
ACAACCCTCATCAT-----CTCCAGGCCATGTCTAATTCTGGGGTTGGT  
CATCCA-----CACCCCTTTTGATGCCAGTTCGCTGTCTGCAGCTAT  
TGGCATAGGCTGTACATAGAT-----

-----TGCAAAGTTGGCA  
TTATTAATGGGCTTCTGGTGGGTCATCCTCCGTGGATGACTCCCCAGTC  
GACACCATCACTCGAAGATTTCCATATGATGTGGCACTGGTAGCAGCATT  
AAAAGACCTAGAAGAAGACATCATGAAGGGCTGACTGAATGTGGAATGG

AAGACAGCGCTTGCACCTCAGGCTTCAGCGTTATGATCAAAGAATCCTGT  
GATGGCATGGGCGACGTCAGCGAGAAACACGGAGGAGGACCTGCGGTTCC  
TGAGAAGGCGGTACGCTTTTTCATTCACTATTATGTCTATCTCGATCCTGG  
CAGATGGCGAGGAA-----AAGCCA  
GTTACCATCTATACTGAGCCAAAGCCAAACTCCGAACTGTCATGTAAGCC  
CCTTTGTCTGATGTTTGTGATGAATCAGACCATGAAACACTCACAGCTG  
TCCTGGGGCCGATTGTTGCTGAGCGTGAAGCGATGAAAGACAGCAGACTC  
ATTCTGTCAATGGGTGGCTTGCCTCGCTCCTTTTCGTTTCCACTTCAGAGG  
CACAGGATACGATGAGAAGATGGTACGTGAACTGGAGGGCCTGGAGGCCT  
CAGGTTCCAGCTATATCTGCACGCTGTGTGACTCCACTCGGGCAGAGGCC  
TCTCACAATATGGTACTGCATGCCATTACCCGCAGCCATGAAGAGAACCT  
GGAGCGTTACGAAATATGGGAACTAATCCCTTTTCAGAGTCTGTCGATG  
AGCTGCGGGACCGTGTCAAAGGGGTCTCTGCCAAACCCTTTATGGAGACC  
CATGCAACACTGGATGCATTACACTGTGACATTGGAAATGCCACTGAGTT  
CTACAAAATCTTTCAAGATGAGATTGGGGAAGTGTACAAAAAAGT---CA  
AC---CCCACCCGTGAGGAACGGCGTAGTTGGAGAGCAGCCCTAGATAAA  
CAGCTGAGGAAGAAAATCAAGCTAAAACCAGTAATGAGGATGAATGGGAA  
CTATGCCCGGAAGCTAATGACCATGGAGGCAATGGAAGCGGTGTGTGAGC  
TGGTACCCACTGAGGAGAGGAGGGAAGGCCTGAGGGAGCTTATGGGCCTC  
TACATCCAGATGAAGCCTGTCTGGCGTTCCCTCCTGTCCAGCCAAAAGATG  
CCCTGACGAGCTGTGCCGCTACAGCTTCAACTCCCAGCGCTTTGCTGACC  
TCCTGGCCTCCACATCTAAATCTCGTTACAATGGAAAGATCACCAACTAC  
CTTCACAAAACGCTGGCTCATGTGCCTGAA-----  
-----TCCTACA  
CTATTGAAATGTGTCCCTTGGGGCCAAGATGGAAGGAGAATCCACATCCT  
TTCTCTTGCTCCATTGAAGATCCTACAAAACAGACAAAGTTTAAAGGCAT  
CAAAACGTACATTTTCGTACCGGGTCACACCGAGCCACACAGGGCGTCCTG  
TCTACAGACGCTACAAACACTTTGACTGGCTATAACAACCGTTACTGCAC  
AAGTTCACTGTGATCTCCGTGCCTCATCTTCCAGAGAAACAGGCCACTGG  
GCGATTTGAGGAAGACTTCATCGAGAAGCGTAAGAGGCGATTGATACTGT  
GGATGAACCATATGACTACTCACCCGGTTCTCTCGCAATATGAAGCCTTT  
GAGCACTTTCTCATGTGTGCTGATGATAAGCAATGGAACTGGGCAAGAG  
AAGGGCAGAGAAGGATGAGATGGTGGGTGCCATTTTCATGCTAACCTCC  
AGATTCCGAATGAGCACCAAGACCTTCAGGATGTAGAAGAGCGAGTTGAT  
TCCTTCAAGACATTTGCTAAGAAAATGGATGATAGTGTTCATGCAGCTCAC  
ACATGTTACCTCGGAGCTGGTGCACCAAGCACCTTGGCGGATTTAGAAAGG  
AGTTCCAACGGCTAGGAAATGCCTTTCAGTCTATCAGCCAGGCATTCATG  
CTGGACCTCCCCATGCTCAGAGCCTCTCAATCAAGCCATCTCTCAT--  
-----TTCCCTCAAACCTGACCTCTCTGGGTTCATCATCGGCGTCG  
GTGTGGTCCGAAACCTCCTGATTTCCATCCTGCTGGTTAAAGACAAGAGC  
CTGCACCGGGCGCCGTAATACTTCCCTGCTGGACCTGTGCGCTTCCGACAT  
CCTGCGCTCGGCCATCTGCTTCCCCCTTCGTCTTACCTCGGTCAAGAATG  
GGTCCGCCTGGAGTTACGGCACGCTCACCTGCAAAGTGATCGCCTTCCCTG  
GGCGTGCTCTCCTGCTTCCACACGGCGTTCATGCTATTCTGCGTTAGCGT  
CACCCGCTACCTAGCCATCGCGCACACCGTTTCTACACCAAGCGCTTGA  
CCTTCTGGACGTGCCAGCCGTCATCTGCATGGTGTGGACGTTGTGCGGTG  
GCCATGGCGTTCCCGCCGGTGTGGACGTGGGGACGTACTCGTTTATCCG  
CGAGGAGGACCAGTGCACGTTCCAGCACCGCTCTTCCGGGCGAACGATT  
CCCTCGGCTTCATGCTCCTGCTGGCGCTCATCCTCCTAGCCACACAGCTA  
GTTTACCTCAAGCTTATCTTCTTCGTCCACGACCGTCGAAAGATGAAGCC  
CGTCCAGTTTGTGCTGCCGTCAGCCAGAACTGGACTTTCACGGTCCGG  
GCGCTAGCGGCCAAGCGGCGGCTAACTGGTTAGCTGGATTCCGGTAGAGGC  
CCCACCCCGCCTACTTTGCTAGGCATCCGGCAGAACAGCAACGCGGCGGG

TCGCAGGCGTCTACTGGTGTGGATGAGTTTAAAACGGAGAAGAGGATTA  
GTAGAATGTTCTACATCATGACGTTTTTCTTCTGGCTCTGTGGGGGCC  
TATCTTGTCGCCTGCTACTGGCGGGTTTTTGAAGGGGCCCCGTGGTCCC  
CGCAGGGTATCTGACGGCGGCCGTGTGGATGAGCTTGGCCAAGCCGGG  
TCAACCCTTTCATCTGTATCTTCTCCAACAGGGAGGCCAAATCTCGCTTT  
CACTCTGGCGTGGGGACTGGACCTGGCACGGAGC---GCAGCGTCCCACT  
CGGCAACAGCTTGCTGTCCCCGCACCAAACCGAGGAGCCCACTGTTGCCT  
CCCCCCCCGAGCGATGGTTTTGTACCC---CTGCCAACAACCGACTGGAC  
TTCGCGGCCTCAGCATACGATGCGGCT-----GATTTGCGCCGGTAA  
CGCGGCCACCTTGCTGTCTACGCAGCGGCTGGAGTGAAAGCTC-----  
TTCCCATGTGCGCGGGCGGGCTGCTCCAGCCGGCCTCTGAGCTACTACGCA  
GACCCGTCCG---GCTGG---GGAGGACGCACGCCGCCGAGTACTGCGG  
CGTCAACAACAAATCCAGCTCGGTGTTCCCCTGCTGGCCGGCCAAC TCCA  
TCGGCGGCAGAACGAGCG---CC---AACTACCTGA-----GCGAG  
GA---AGTG---GACTC---CATCCCCACGGAGAGGTCACCG---AT---  
CGGCGGCTCCGAGGAG---GCCAAACCCAAAGACGT-----GTCGGA--  
-GTCGAGCTGGATAGAGACCACACCTCCTCCATTAAGTCCATGGACTCC  
AGCGATTCTGGGATCTTTG---ACAATCCAAGAGGAGACGGATCTCACC  
GTCGGCCACGCC---GTGTACAGAGACCGTGTCCCCGCTCAAGT  
CTGAG-----TCAACAGGCGAAGTCACAGAGAGAGAAGTGGCGTTGGGG  
ATCAATCCGTTGCGCGATGGGATGGGCGCCTTCAAATAAACACAGCTC  
CCACGACATCGGGTCCGG---ACAGACCGCCTTCTCCTCCAGGCG---C  
CCGGCTAC---GCGGCGGCCGCGCTGGGA---CACCATCA-----CCAC  
CCGACCCACGTTGGCTCC---TACTCCACGGCGGCTTTCAACTCCACTAG  
GGACTTTCTCCTCAGAAATCGGGGTTTCGGGGACGCAGCCGG-----  
-----CGCGCAGCACAGTTTTGTTGCTC-----TGGGAGTTT---C  
-----GCAGGGCCGCATGGACACTCGGATGCAGCGGGGCACCTGCTCTT  
CCCCGGGCTGCATGAG---CAAGCGGCCGACACGCGTCTCCAACGTGG  
TCAACAGCCAGATGCGGCTCGGCTTCTCGGGGACATGTACGGCCGAGCC  
GATCAGTACGGCCACGTTACCAGCCC GCGGT---CAGACCATTACGCATC  
GACCCAAC TACACGGCTACGGCCCCATGAACATGAACATGGCCGCG---C  
ACCACGGCGCGGGGCTTCTTCCGATACATGAGGCAGCCCATCAAACAA  
GAGCTCATCTGCAAGTGGATCGAGCCGAGCAGCTGACGAACCCCAAAA  
GTCGTGCAACAAAAC TTTTAGTACCATGCACGAGTTGGTGACCCATCTGA  
CGGTGGAGCACGTGGGGGGACCGGAGCAGACGAACCACGTCTGCTTCTGG  
GAGGACTGCTCCAGAGAGGGGAAGCCCTTCAAAGCCAAATACAAACTTGT  
AAATCACATCAGAGTGCACACCGGA-----  
-----

>Protomyctophum choriodon

AGCCTCCTAATTGAGCTGAACTCAGCCAACCTGGGGCCCTCCTGGGGGA  
CGACCAGATTTATAATGTAATCGTAACAGCTCATGCCTTTGTAATAATTT  
TCTTTATGGTTATACCTATCATAATTGGAGGATTCGGAAACTGATTAATC  
CCCCAATGATCGGAGCCCCGATATAGCATTCCCCGAATAAATAATAT  
AAGCTTCTGACTTCTCCCTCCCTCCTTCCTCCTCTTTTAGCCTCCTCCG  
GCGTAGAAGCCGGGGCCGGAACCGGCTGAACAGTCTACCCGCCTCTTGCC  
GGAAACCTCGCCCACGCCGGAGCATCTGTTGATTTAACAATCTTTCCCT  
TCACCTAGCAGGTGCTCCTCAATCTTAGGCGCAATTAATTTTATTACAA  
CCATTATTAATAAAGCCTCCTGCAATCTCCCAATACCAAACCCCTTTA  
TTTGTATGAGCCGCTCATTACAGCAGTACTTCTCCTCCTGTCAC TCCC  
AGTACTAGCTGCCGGCATCAAAATGCTCTAACAGACCGAAATCTAAACA  
CCACCTTCTTCGACCCCTCCGGCGGAGGAGACCCAATCCTTTACCAGCAC  
TTANNNNNNNNNNNNNNNNNNNNNNNNNNNNNNNNNNNNNNNNNNNNNNN  
NNNNNNNNNNNNNNNNNNNNNNNNNNNNNNNNNNNNNNNNNNNNNNNNNN



-----  
-----  
-----  
-----  
-----

-----TATCTCATCTACGCTTCGTTCTCCTTCATGGGATGTT  
TACAAATCAGCGACGGGTCAAACGTTGTGAACCTGCTGGCGAGTAACTCT  
CCGAGTGTGTCTTTTGCCTCACCCAGCAGAAGTACTTCAGTAACTACAG  
CCCCGTTATYGGGTCTACATTTATGAACCCATCGAGTACTGGAATCCA  
CGGTGCAGGAGCATCTGAAGACACTGAGTCACGGCTTCAACAAGATCTCC  
TGGATCGACAACCTTCTTCCACTACCTGCGGGTGGTGAACGTGAGCGCGTC  
GACCAAGAACGACTTCATCACCATCCTAAAGGGCTCCTTCCACACAGCC  
CGGAGTACCAGCACTTACCAGGACATCATCTTCTCCAAGA---ACCGC  
GAGAGCGAGGGCGACGAGTACGACATCATCGCCTCGCGCATGTACCTGGT  
GGCGCGCACCACCGAGAAGAAACGCGAGGAGGTGGTGGAGCTGCTGGAGA  
AGCTGCGTCCGCTGATGCTGATCAACAGCATCAAGTTCATCGCCTTCAAC  
CCCACCTTCGTCTTCATGGACCGCTACAGCTCCTCGGTTCATATCGCCCAT  
CCTTACCTCGGGCTTCAGCGTGCTCACCATCCTCATCCTCACCTTCTTYC  
TCGTCATCAACCCGCTGGGGAACCTTCTGGCTCATCCTGACGGTCACGTTCG  
GTGGAGCTGGGCGTGTGGGTCTGATG-----

-----  
-----  
-----  
-----  
-----

-----TAATGATCAAAGAGTCTGCGATGGCATG  
GGAGATGTCAATGAGAAACATGGCGGGGGCCCGGATCCCTGAGAAAGC  
GGTCCGTTTCTCTTTCACCGTTATGTCCATCTCTGTGACGCCGGATGGGA  
AAACG-----GAGGCGTTGACCATC  
TTCACAGAGCCAAAGCCCAACTCCGAACGTCTCCTGTAAGCCCATGTGCCT  
GATGTTTGTGGATGAGTCGGACCAGAGATGCTCACTGCCGTCTTGGGGC  
CCGTGGTTCGAGAGCGCACGGCAATGACAGAAAGCCGACTCATCCTGTCC  
ATGGGTGGCCTCCCCGCTCGTTCCGCTTCTACTTCAGAGGCTCAGGCTA  
TGATGAGAAGATGGTGCAGGAGATGGAGGGCCTGGAGGCATCAGGTTCTA  
CCTATGTCCTGACTCTGTGTGACTCCACCCGGGCGAGGCCTCTCGCAAC  
ATGGTGCTCCATTCCATCACCAGCAGCCATGGCGAGAACCCTGGAGCGCTA  
CGAGATATGGCGGAGCAACCCCTTTGCGGAATCTGTTCGAGGCGTTGCGAG  
ATCGGGTGAAGGGGTCTCCGCCAAGCCCTTTATGGAACCCAGCCACT  
CTGGATGCATTGCACTGTGACATTGGTAACGCCACTGAGTTCTACAAAAT  
CTTCCAAGATGAGATCGGGGAGGTGTTCCAGAAAGC---CAAC---CCCA  
GCCGTGAGGAAAGGCGCCTCTGGAGGGCGGCTCTCGACAAGCAGCTGAGG  
AAAAAACTCAAGCTCAAGCCCGTGTGCGGATGAATGGGAACTACGCCCG  
GAGACTGATGTCCGAGGAGACCGTGGATGTGGTGTGTGAACTGGTGCCCT  
CAGAGGAAAGGCGGGAGGCTCTGAGGGAGCTAATGGGGCTTTACATCCAG  
ATGAAACCTGTGTGGCGTGCCAGCAGCCAGCCAAAGAATGCCCTGACCA  
ACTGTGCCGCTACAGTTTCAACTCCAGCGCTTTGCAGACCTCCTCTCCA  
CTACCTTCAAATACAGGTAT-----

-----TCGTACACCATCGAGA  
TGGGCCCCAAAGGGCCCCTGTGGAAGGAGAGCCCGCAGCCCTTACCTGT  
TCCATCGAGGACCCCACTAAACAGACCAAGTTCAAGGGCATCAAGACGTA  
CATCTCCTACCGGGTCACGCCGAGCCACACGGGTACCCCGTGTACAGAC  
GCTACAAGCACTTTGACTGGCTGTACAACCGCCTGCTGCACAAGTTCACC  
GTGATCTCCGTCCCCACCTGCCGGAGAAGCAGGCGACTGGGCGCTTCGA











-----  
-----  
-----  
-----  
-----  
-----  
-----  
-----  
-----  
-----  
-----  
-----  
-----  
-----  
-----  
-----  
-----  
-----  
-----  
-----  
-----ACGGCATTTCCTCCCA  
AGCT---CCCGGCTAC---GCAGCCGCTGCCCTGGGA---CATCACCA--  
----CCATCCGACTCATGTACAGTTCT---TACTCTACGGCGGCTTTCAAT  
TCCACCCGGGATTTTCTCTTCAGAAATCGAGGCTTCGGAGACGCCACCAG  
-----CGCTCAGCATAGTCTCTTCGCCTCCGC---AGCGGGAA  
GTTT---T-----GCAGCCCACATGGACACTCAGATGCAGCGGGACAC  
CTGCTCTTCCCAGGACTTCACGAA---CAAGCTGCGAGCCATGCTTCCTC  
AAATGTCGTTAATACTCAGATGCGATTGGGCTTTTCGGGGGACATGTACG  
GCAGAGCCGACCAGTACGGCCACGTTACCAGCCCGCGGT---CCGACCAC  
TATGCATCGACCCAGTTGCATGGCTATGGCCCTATGAACATGAATATGGC  
CGCG---CATCATGGAGCAGGGCCCTTCTTCGTTACATGAGGCAGCCGA  
TAAACAAGAGTTGATTTGCAAATGGATCGAACCGGAACAACCTGACGAAC  
CCAAAAAGTCGTGCAACAAAACCTTTTAGCACAATGCACGAGCTCGTCAC  
TCATTTGACAGTGGAGCATGTAGGGGGACCGGAACAGTCAAACCACATTT  
GCTTCT-----

>Psenes maculatus

-----  
-----  
-----  
-----  
-----  
-----  
-----  
-----  
-----  
-----  
-----  
-----  
-----  
-----  
-----  
-----  
-----  
-----  
-----  
-----  
-----NNNNNNNNNGAAACCTTCACCCAACCTAACTGCCTTGGCATGCTGTTG  
CTGTCTGACGCCACCAAGCTGTTCAGAGCTTTCTTGGGGCAT  
GTGCCTCAGCAACTTCCCTGCTATTTGCAAGACAGAGGATTTCTTCCAAAC  
TGCCCAAAGATATGGTGGTGCAGCTTTGTACATGAGGAGCTGGAGACA  
GAAGATGAGAGACTGGTGTATGAAGCTGCCCTGAACCTGGATCAACTATGA

CCTGAAAGGAGGCACTGCCACCTTCCAGAGCTCCTGAGAACGGTCCGCC  
TTGCCCTGCTGCCCGCCATCTTTCTAATGGAGAATGTCTCGACAGAAGAG  
CTGATCAACGCCAGGCCAAGAGCAAGGAGCTGGTGGATGAGGCTATCCG  
CTGTAAGCTGAAAATCCTGCAGAATGACGGCGTCGTAAACAGCCCGTGTG  
CACGGCCAAGAAAAACCAGCCATGCTCTCTTTCTCCTGGGAGGGCAGACT  
TTCATGTGTGACAAGTTGTACCTGGTGGACCAGAAGGCCAAAGAGATCAT  
CCCGAAGGCAGACATTCACAGCCCAAGGAAGGAATTCAGCGCATGTGCCA  
TCGGCTGTAAGGTGTACATCACAGGTGGGA--GAGGCTC-AGAGAATGGC  
GTGTCCAAAGATGTATGGGTCTACGACACCGTCCACGAGGAATGGTCCAA  
AGCGGCGCCGATGCTGATTGCCAGGTTTGGTCATGGCTCTGCAGAGCTGA  
AACACTGCCTGTACGNNNNNNNNNNNNNNNNNNNNNNNNNNNNNNNNNNNN  
AATACATTGTTGTGTTTCAGTCGTTCAACAA  
CAAGGCTGATACTGAACGAAGCCGAGCTAATCATGGCGCTGGCCAGGAG  
TTCCAGATGAGAGTGGTACAGTTACCCTAGAGGAACAATCTTTCCCCAG  
TATTGTCCAGGTGATCAGTGGTGCATCGATGTTAGTCAGCATGCATGGAG  
CTCAGCTTATCACCTCACTCTTCTCCCCAGAGGATCTACTGTGGTGGAG  
CTGTTCCCTTTGCTGTGAACTCAGAGCAGTATAACCCATATAAAAACCT  
TGCTCCCTTCCAGGCATGGACCTTCATTATATTTCTGGAGGAACACTC  
AGGAGGAGAACACTGTCACCCATCCAGACAGACCCGGGAACAAGGAGGC  
ATCACTCACTTGGAGAAGGAGGAGCAGGAGCGAATACTGACCAGCAAAGA  
CGTCCCAGGCACCTGTGCTGCCGCAACCCGGAGTGGCTCTTTTCAATCT  
ACCAGGACACTTTGGTAGACATTCTTCTTCTTCTGGAAGTCCTCAA--G  
GAGGGAATGAAG---ACCAAGCCCAGCTTGAAGAA---GTCCAAACCAGC  
CAGTGTGTCCATCCGGGCCGGGTCAGAGAAGCCCAGTGTGACACCTCAG  
TACAAACTACCAATGAGGCTAAACTCACAGTCTCTGGCAGATCCCATGG  
AATTTGAAATACCTGAAAGTAAGAGAGGTCAAGTATGAAGTGNNNNNNNNN  
TACCAGCAAGGGAACCTCTGGAGGATCAGATCATCCAGGCGAACCCGGCGC  
TGGAGCCTTTGGAAACGCCAAAACGCTGAGAAACGACAACCTCGTCCCGT  
TTTGGAAAATTCATTGCAATTCACCTCGGAAACAGTGGCAAGTTGTCGTC  
TGCTGACATCGAGACGTACCTGCTGGAGAAGTCTCGTGTACCTTTCAGC  
TCAAGGCTGAGAGGAACATCACATCTTCTACCAGATCCTGTCCAATCAG  
AAGCCAGAGCTGCTGGACATGCTGTTAATCACCAACAACCCGTACGACTA  
CTGCTACATCTCCCAAGGAGAGGTAACGGTCGCTCATCAATGACTCGG  
AGGAGCTGATGGCCACCGACAGCGCCTTTGATGTGCTCGGCTTCACTCCG  
GAGGAGAAGATGGGCGTCTATAAACTGACCGGCGCCATCATGCACCACGG  
CAACATGAAGTTCAAGCAGAAGCAGCGTGAGGAGCAGGCCGAGCCCGACG  
GGACGGAGGCTGCTGATAAATCAGCTTACTTGTGAGGGCTGAACTCCGCT  
GACCTCATCAAAGGCCTGTGCCATCCCAGAGTCAAGGTAGGAAATGAGTA  
TGTTACCAAAGGCCAGAGTGTGGACCAAGTCTACTACNNNNNNNNNNNNNN  
GGGAAGCACTACA  
ACACCAAGCTGGGATATAAGCGCCATGTGGCCATGCACTCTGCCACGGCA  
GGGGATCTCACCTGTAAAGTGTGCATGCAGAGCTACGAGAGCACACCTGT  
TCTCCTGGAGCACCTCAAGAGCCACTCGGGGAAGTCTCGGGCGGAGCCA  
AGGAGAAAAAGCACCCATGTGACCACTGCGACCGCGTCTTCTACACACGG  
AAGGATGTGAGACGGCACATGGTGGTCCACACGGGCCGAAAGGACTTCCT  
GTGCCAGTACTGTGCCAGCGCTTTGGCAGGAAGGATCACCTGACCCGCC  
ACGTGAAGAAGAGCCACTCGCAGGAGCTGCTGAAGATCAAGACGGAGCCT  
CCTGATATGTTAGGTCTTTTAGCTTCGGGGTCGCCACCTTGCTCTGTGAA  
GGAGGAGCTTAGCCCCATGATGTGCGGCATGGGTCCCAACAAAGACCCCA  
TGATGGGCAAACCGTTCCCCAGTGGCGCCCTTTTCCGATGGGCATGTAC  
AACCCCAACCAC-----CTTCAGGCCATGTCTAATCTGGGGTGGGTCA  
TCCA-----CACCCGTCCCTGATGCCAGCTCGCTGTGCGCAGCTATGG  
GCATGGGCTGCCACATGGAANNNNNNNNNNNNNNNNNNNNNNNNNNNNNNN





GCACGAGTTGGTGACCCATCTGACGGTGGAGCATGTCGGTGGACCGGAGC  
AGACCAACCACATCTGCTTCTGGGAGGANNNNNNNNNNNNNNNNNNNNNNNNNNNNNNNNNNNNNNNNNNNNNNNNNNNNNNNNNNNNNNNN  
NNNNNNNNNNNNNNNNNNNNNNNNNNNNNNNNNNNNNNNNNNNNNNNNNNNNNNNNNNNNNNNNNNNNNNNNNNNNNNNNNNNNNNNNNNNN

>*Psettodes erumei*

AGCCTGCTAATTCGGGCAGAACTTAGCCAGCCCCGAACCCTCCTGGGAGA  
TGACCAAATCTACAATGTCATCGTAACAGCACACGCCTTCGTTATAATTT  
TCTTTATAGTAATGCCTATCATGATCGGAGGCTTCGGAAACTGACTTATC  
CCCCAATAATCGGCGCCCCAGACATAGCATTCCCCCGTATGAATAACAT  
GAGTTTCTGACTCCTTCCCCCTTCTTCTTACTGCTACTTGCCTCTTCAG  
GAGTTGAGGCTGGTGCGGGTACTGGATGAACCGTTTATCCGCCTCTGGCC  
GGCAACCTAGCCCACGCAGGAGCATCCGTTGACCTGGCTATCTTTTCCCT  
CCACCTGGCCGGAATCTCCTCAATTCCTGGGGCCATTAATTTTATCACTA  
CGATCATCAACATAAAAACCCCCGACCGTCTCTATGTACCAAATCCCCCTC  
TTTGCTGAGCCGTGCTCATTACAGCTGTCTGCTTCTCCTCTCTCTTCC  
CGTCTAGCTGCTGGCATTACAATGCTCCTAACAGATCGCAACCTTAACA  
CCACATTCCTCGACCCTGCAGGGGGAGGAGACCCCATTCTATATCAACAC  
CTATTC-----  
-----  
-----

-----NNNNNNNNNGAAACCTCACCCAACCTAAGTCTTGCCATGCTGTTG  
CTGTCTGACGCCACCAGTGACCAAGCTGTAGAGCTCTCCTGGGGTAT  
GTGCCCTCAGCAACTTCCCCGCTATTTGCAAGACAGAGGACTTCCTCCAAC  
TGCCCCAAGATATGTTGTGCGACTTTTGTACACATGAGGAGCTAGAGACA  
GAAGATGAGAGACTGGTTTATGAAGCTGCTCTTAACTGGATCAACTATGA  
CTTGAAAAGAGACACTGCCACCTTCCAGAGCTCCTGAGAACGGTCCGCC  
TGGCTTTGCTGCTGCCATCTTCTCATGGAGAACGTGTCTACAGAAGAG  
CTGATCAACGCACAGCCCAAGAGCAAGGAGCTGGTGGATGAAGCTATCCG  
CTGYAAGCTGAAGATCCTGCARAACGATGGCGTTGTCAACAGCCCATGTG  
CTCGACCAGAAAAGACCAGCCATGCCCTATTTCTTCTGGGAGGGCAGACT  
TTCATGTGCGACAAGTTGTACCTGGTGGACCAGAAAAGCCAAAGAGATCAT  
CCCCAAGGCCGATATCCCAGCCCCAGGAAGGAGTTCAGCGCCTGCGCCA  
TCGGATGCAAGGTGTACATCACTGGTGGGA--GGGGCTC--AGAGAACGGT  
GTGTCAAAGATGTGTGGGTCTACGACCCCGTCCAAGAGGAATGGTCCAA  
AGCAGCACCGATGCTCATTGCCAGGTTTGGCCATGGCTCTGCAGAGTCGA  
AACACTGCCTCTACGTAGNNNNNNNNNNNNNNNNNNNNNNNNNNNNNNNNNNNNNNNNNNNNNNNNNNNNNNNNNNNNNNNGGATG  
ATTACATTGTTGTGTTTCAGTCCGTTCAA  
CAACAAGGCTGATACTCAATGAAGCTGAGCTAATCATGGCGCTGGCCCAG  
GAGTTCAGATGAGAGTGGTACGGTATCCCTGGAGGAACAGTCTTTTCC  
CAGTATCATTACAGGTGATCAGCGGTGCGTTCATGTTAGTCAGCATGCACG  
GAGCTCAGCTCATCACCTCACTCTTCCTCCCCAGAGGAGCTACTGTGGTG  
GAACTGTTCCCCTTTGCAGTGAACCCAGAGCAGTACACCCCTTATAAAAC  
CCTTGCCCTCCCTCCAGGCATGGACCTTCACTATATTTCTTGGAGGAACA  
CTAATGAGGAAAACACCATCACCCACCCAGACAGGCCATGGGAACAAGGA  
GGCATTGCTCACTTGGAGAAGGAGGAGAAGGAGCGAATACTGGCCAGTAA  
GGACGTTCCCAGGCACCTGTGTTGCCGCAACCCAGAGTGGCTCTACCGCA  
TCTATCAGGACACTTTGGTAGACATCCCTTCCTTCTTGGAAAGTCATCAG--  
--AGAGGGCATGAAG---ACCAAGCCAGCTTGAAGAA---GTCAAAGCC  
AGCCAGCATGGTACACCCAGGCCGAGTACAGAGAACCCEATGTACAGACCT  
CAGTACAAACCTAATGAGGCTAAACTCTCAGTCTCCTGGCAGATCCCA  
TGGAATCTGAAATATTTGAGGGTAAGAGAGGTCAAGTACGAGGTGNNNNNNNNNNAAAAA  
AGACACCAGCAAGGGGACACTGGAGGATCAAATCATCCAGGCAAACCCTG  
CGCTGGAGGCCTTTGGCAACGCCAAAACGTTAAGAAATGACAATTCATCT

CGTTTTGGAAAATTCATTCGTATTCACCTTTGGTACGAGTGGCAAGCTATC  
ATCTGCTGACATTGAGACATACCTGCTGGAGAAGTCACGTGTCACCTTTC  
AGCTAAAAGCAGAGAGGAAGTATCACATCTTCTACCAGATCCTGTCCAAT  
CAGAAGCCGGAGCTGTTGGACATGCTGCTGATCACTAACAATCCATACGA  
CTACTCCTACATCTCCCAAGGAGAAGTAACAGTCGCCTCCATCAATGACT  
CAGAGGAGCTGATGGCCACCGACAGTGCCTTTGATGTGCTCGGCTTCACT  
CCAGAGGAGAAAATGGCCGTCTATAAGCTGACTGGCGCCATCATGCACTA  
CGGCAACATGAAGTTCAAACAGAAGCAACGCGAGGAGCAGGCTGAACCTG  
ACGGGACAGAGGCTGCTGATAAATCAGCTTACCTAATGGGGCTGAACTCT  
GCTGACCTAATAAAAAGGCCTGTGCCACCCAGAGTCAAGGTAGGAAATGA  
ATATGTCACCAAAGGCCAAAGTGTGGATCAAGTCTACTACNNNNNNNNNNNN  
NNNNGGGAAGCACTA  
CAACACCAAGCTTGGATATAAGCGCCATGTGGCCATGCACTCTGCCACCG  
CAGGGGATCTCACCTGTAAAGTGTGCATGCAGAGCTATGAGAGTACACCT  
GTTCTCCTGGAGCACCTCAAGAGCCACTCCGGAAGTCTTCGGGTGGCAC  
CAAGGAGAAAAAACACCCATGCGACCCTGTGACCGTCGCTTTTACACAA  
GGAAGGATGTGAGGCGGCACATGGTGGTCCACACGGGCCGAAAAGACTTC  
CTGTGCCAGTACTGTGCCAGCGCTTTGGTAGGAAGGACCACCTGACAAG  
GCACGTGAAGAAGAGCCACTCGCAGGAGCTGCTGAAGATCAAGACGGAGC  
CTCCAGATATGTTAGGTCTTTTAGCTTCCGGATCACCTCCTTGCTCTGTG  
AAGGAGGAGCTCAGCCCATGATGTGTGGCATGGGTCCCAACAAAGACCC  
CATGATGGGCAAACCGTTCCTTAGTGGGGCTCCTTTTCCGATGGGCATGT  
ACAACCCCCACCAT-----CTCCAGGCGATGTCTAATACTGGGGTGGGT  
CACCCA-----CACCCATCCCTAATGCCAGTTCCTTGTCTGCAGCTAT  
GGGCATGGGCTGCCACATGGAANNNNNNNNNNNNNNNNNNNNNNNNNNNNN  
NNNNNNNNNNNNNNCGTCAACCTGCTGGCTAGTAACCTCTCCA  
AGTGTTCATACGCTCTGACCCAGCAGAAATACTTCAGTAACCTACAGCCC  
TGTGATTGGGTTTTATATTTATGAGCCCATCGAGTACTGGAACCTCCACGG  
TTCAGGAGCACCTGAAGACTCTGAGTCATGGCTTCAACAAGATCTCCTGG  
ATGGACAACTTTTTCCACTACCTGCGGGTGGTGAATGTGAGTGCCTCAAC  
CAAGAGCGACTTCATCAACATCCTTAAAAGCTCCTTCCGCGAGCCCGG  
AGTACCAGCACTTCACTGAGGACATCATATTCTCCAAGA---ACGCGAG  
ACTG-----ATGAGTATGATATTTATCGCATCACGGATGTATTTGGTTGC  
ACGGACGACTGAGAAGAAACGCGAGGAGGTGGAGCTTCTGGAAAAGC  
TTCGCCC GTT GATGCTTATCAACAGCATCAAGTTCATTGCCTTCAACCC  
ACATTTGTGTTTCATGGACCGGTACAGCTCCTCTGT CATATCACCCATCCT  
GACCTCAGGCTTCAGTGTACTCACCATCCTCATCTCACTTCTCTCCTGG  
TCATCAACCCCTTGGAAGAACTTCTGNNNNNNNNNNNNNNNNNNNNNNNNN  
NNNNNNNNNNNNNNNNNNNNNNNNNNNNNNNNNNNNNNNTCTTGCAATGTTGGCATT  
ATTAATG  
GTCTCTCTGGATGGGCTTCTTCGGTAGATGACTCCCCAGCTGACACCATC  
GCTCGGCGGTTTTCGCTATGATGTTGCACTGGTGTGCGCATTAAAGGATCT  
GGAGGAGGACATCATGGAAGGGCTGAGAGAGAGTGGGCTGGAAGACAGTG  
CTTGACCTCAGGTTTTATGTCATGATCAAAGAAATGCTGCGATGGCATG  
GGCGATGTCAGCGAGAAGCACGGTGGAGGACCGCTGTTCTGAGAAGGC  
TGTGCGTTTCTCTTCCACCATTATGTCTGTCTCTGTCCTGGCAGACGGTG  
AGGAG-----AAGGAGGTAACCATC  
TTCACAGAGCCCAAGCCAAACTCAGAAGTGTCTGTAAGCCCCTTTCCT  
GATGTTTGTAGATGAGTCAGACCATGAGACACTCACAGCTGTCTTAGGGC  
CTATAGTTGCAGAGCGTGGAGCAATGAAAGAAAGCAGACTCATCTATCC  
ATTGGTGGCCTGCCTCGTTTCCCTTCCGTTTTCCAGTTCAGAGGCACAGGATA  
CGATGAGAAGATGGTGCAGAGATGGAAGGCCTGGAGGCCTCTGGATCCA  
CATATATCTGCACTCTGTGTGACTCCAGTCGTGCAGAGGCCTCTCAAAC

ATGGTGTGCACTCCATCACCCGCTGTCATGAAGAGAACCTAGAACGTTA  
CGAAATATGGAGAACCAACCCCTTCGCGGAGTCAGCAGATGAGCTGCGAG  
ACAGAGTCAAAGGGGTCTCTGCCAAGCCCTTCATGGAGACCCAGCCACT  
CTAGATGCATTACACTGTGACATTGGCAATGCCACTGAGTTCTACAAAAT  
TTTCCAGGATGAGATTGGGGAGGTATACCAAAGGT---CAGC---CCCA  
GTCGGGAAGAGCGGCGCAGTTGGAGGGCAGCCCTAGATAAACAGCTGAGG  
AAAAAGATGAAGCTTAAACCGGTAATGAGGATGAAATGGGAACTATGCCCC  
CAGGCTAATGACCCTGGAGGCTGTGGAGGTGGTGTGTGAGCTGGTGCCCT  
CCGAGGACAGGAGAGAGGCCCTGAGGGAGCTCATGAGGCTCTACCTCCAG  
ATGAAGCCTGTGTGGCGTGCCACCTGCCAGCCAAGGAATGCCCTGACCA  
GCTGTGCCGCTACAGCTTTAACTCCCAGCGCTTTGCTGACCTCCTCTCCT  
CTACCTTCAAATATAGGTACAATGGAAAGATAACCAATTACCTTCACAAA  
ACCTTGGCCNNNNNNNNNNNNNNNNNNNNNNNNNNNNNNNNNNNNNNNNNN  
NNNNNNNNNNNNNTCGTACACCATYGAGATGGGCCCTTGGGGCCCCGGTGGGA  
AGGAGAACCCACAGCCTTTCTCCTGCTCAATCGAAGACCCACAAAACAG  
ACAAAGTTCAAGGGCATCAAGACCTACATATCGTACCGGGTCACGCCAG  
CCACATAGGGCGTCTGTCTACAGGCGTTACAAACACTTTGACTGGCTGT  
ACAACCGCCTGCTGCACAAGTTCACTGTGATCTCCGTGCCTCACCTGCCC  
GAGAAGCAGGCCACGGGGAGATTTGAGGAAGACTTCATCGAGAAGCGCAA  
GAGACGGCTGATACTGTGGATGAACCACATGACCAGTCACCCAGTCCTCT  
CCCAGTATGAAGGCTTTGAGCACTTCTGATGTGTGCCGACGACAAGCAG  
TGGAAGCTGGGAAAGCGACGGGCGGAGAAGGACGAGATGGTCGGCGCCCA  
TTTCATGTTGACCCTCCAGATCCCCAACGAGCACCAGGACCTGCAGGACG  
TGGAGGAGCGGGTGGACTCCTTCAAGGCCTTTGCTAAAAAGATGGACGAC  
AGCGTGATGCAGCTCACACATGTTGCCTCGGAGCTGGTGCGCAAACATCT  
CGGCGGGTTCAGGAAGGAGTTCAGCGGCTGGGAAATGCCTTCCAGTCCA  
TCAGCCAGGCATTCATGCTGGACCCACCCACAGCTCAGAGGCCCTCAAC  
AANNNNNNNNNNNNNNNNNNNNNNNNNNNNNNNNNNNNNNNNNNNGGTTTCATCATGGGAGTCGGTG  
TGGTTGAAATCTGCTGATCTCCATC  
CTACTGGTCAAAGACAAGAGCCTGCACCGAGCACCTACTATTTCCCTGCT  
GGACCTGTGCGCCTCCGATATCCTGCGCTCTGCCATCTGCTTCCCCTTTG  
TCTTACCTCGGTCAAGAATGGATCTGCCTGGACCTACGGCAGCTGACC  
TGCAAAGTGATCGCCTTCCCTGGGGTGCTCTCCTGTTTTTACACAGCGTT  
CATGCTATTCTGTGTCAGTGTCACTCGCTACCTTGCCATTGCACATCACC  
GTTTCTACACCAAGAGGCTGACCTTCTGGACCTGTCTGGCTGTCACTGC  
ATGGTGTGGACGTTGTCAGTGGCTATGGCGTTTCCACCGGTGCTAGACGT  
AGGGACGTACTCTTTTATCCGGGAGGAGGACCAGTGCACATTCAGCACC  
GCTCCTTTCGGGCGAATGATTTCGCTGGGCTTCATGCTCCTGCTGGCGCTC  
ATCCTCCTGGCCACACAGCTGGTTTACCTCAAGCTCATCTTTTTTGTCCA  
TGACCGTCGAAAGATGAAGCCTGTGCAGTTTGTGCCTGCTGTGACCCAGA  
ACTGGACCTTCCACGGGCCAGGTGCCAGTGGGCAGGCTGCGGCCAACTGG  
CTGGCTGGATTTCGGGCGAGGCCCCACCCCGCCTACTTTGCTGGGCATCCG  
GCAGAACAGCAACGCAGCAGGTCCGAGGCGTCTACTGGTATTGGATGAAT  
TCAAAACAGAGAAGAGGATTAGTAGGATGTTCTACATCATGACGTTTTTC  
TTCTGGCACTGTGGGGGCCCTATCTGGTCGCTGCTACTGGCGGGTGT  
TGCACGGGGCCCCGTAGTCCCTGGGGGCTACCTGACAGCAGCCGTGTGGA  
TGAGCTTTCNNNNNNNNNNNNNNNNNNNNNNNNNNNNNNNNNNNNNNNNNN  
-----  
-----  
-----  
-----  
-----  
-----  
-----



-----  
-----  
-----  
-----  
-----  
-----  
-----  
-----  
-----  
-----  
-----

NNNNNNNNNNNNNNNNNNNNNNNNNNNNNNNNNNNNNNNNNNNNNNNNNNNTGGGGGTAAATCCGTTCCGCG  
GATGGGATGGGCGCCTTCAAATAAACACAGCTCCCACGACATTAGCTC  
CGG---ACAGACGGCGTTTTCTCCAGGCG---CCCGGCTAT---GCAG  
CGGCCGCCCTGGGA---CACCATCA-----CCACCCGACCCACGTGCG  
TCT---TACTCCACGGCGGCTTTCAACTCCACCAGGGACTTTCTCTTCAG  
AAATCGGGGTTTTGCGGGGACGCCACCGG-----GGCGCAGCACA  
GTTTTGTTCCGCTC-----TGGAAGTTT---C-----GCAGGGCCA  
CATGGACTCAGATGCAGCGGGGACCTGCTCTTCCCGGGGCTCCACGA  
G---CAGGCGGCGAGCCATGCCTCTTCCAACGTGGTCAACAGCCAGATGC  
GGCTGGGCTTCTCGGGGACATGTACGGACGGGCGACCCAGTACGGCCAC  
GTTACAAGCCCGCGGT---CCGACCCTATGCTTCCACCCAGCTGCACGG  
CTACGGCCCCATGAACATGAATATGGCCGCA---CACCACGGAGCAGGG  
CCTTCTTTTCGATACATGAGGCAGCCGATCAAACAAGAGCTCATCTGCAAG  
TGGATCGAGCCGAGCAGCTGACGAATCCAAAAAGTCGTGCAACAAAAC  
TTTTAGCAGATGCAGGAGCTGGTGACCCATCTGACGGTGGAGCATGTGG  
GGGGACCGGAGCAGACCAACCACGCTGCTTCTGGGAGGACTGCCCCAGA  
GANNNNNNNNNNNNNNNNNNNNNNNNNNNNNNNNNNNNNNNNNNNNNNNNNNNNNNNNNNNNNNNNNNNNNNNNNNNNNNNNNNNNNNNNNNNNNNNNNNNNN  
NNNNNNNNNNNNNNNNNNNNNNNNNNNNNNNNNNNNNNNNNNNNNNNNNNNNNNNNNNNNNNNNNNNNNNNNNNNNNNNNNNNNNNNNNNNNNNNNNNNNNN  
>Pseudopentaceros pectoralis

AGCCTGCTCATTTCGGGCAGAATTAAGTCAACCAGGCGCCCTTTTAGGGGA  
CGACCAAATTTACAACGTAATTGTTACAGCGCATGATTTTGTATAAATTT  
TCTTTATAGTAATGCCAATTATGATCGGAGGATTTGAAACTGACTTATT  
CCCCTGATGATCGGGGCCAGACATAGCCTTCCTCGAATGAATAATAT  
GAGTTTTTGACTTCTCCCCCATCTTTTCTCCTCCTTGCTTCTCTCTG  
GGGTAGAGGCTGGTGCCGGTACCGGATGAACAGTCTATCCTCCCCTGGCT  
GGCAACTTAGCCCACGCAGGAGCATCCGTTGATCTAACAATTTTCTCTCT  
GCACTTAGCGGGCATTTCCCTCAATCCTTGAGCCATCAACTTCATTACAA  
CCATCATTAACATAAAACCTCCCGCTATTTCCCAATATCAGACTCCCCTC  
TTTGATAGGCTGTATTAATTAAGTCCCGTCTCTCCTCTCTCTCCTTCC  
AGTTCTCGCTGCCGTTAATTAATTAAGTCCCGTCTCTCCTCTCTCTCCTTCC  
CCACCTTCTTTGACCCTGCAGGAGGAGGAGACCCCTATCCTCTACCAACAC  
CTA-----  
-----  
-----  
-----  
-----

-----NNNNNNNGAGAAACCTTACCCATCTAACTGCCTTGGCATGCTGT  
TGCTGTCTGACGCCACCAGTGCACCAAGCTGTGACAGCTCTCTGGGGC  
ATGTGCCCTCAGCAACTTTCCAGCTATTTGCAAGACAGAGGACTTCCCTCCA  
ACTGCCCAAAGATATGGTGGTGCAGCTTTTGTACATGAGGAGCTAGAGA  
CAGAAGATGAGAGACTGGTTTATGAAGCTGCCCTCAACTGGATCAACTAT  
GACCTGGAAAAGAGGCACTGCCACCTTCCAGAGCTCCTGAGAACGGTCCG  
CCTGGCCCTGCTGCCAGCATCTTTCTCATGGAGAAGCTTTCTACAGAAG  
ACCTGATCAATGCCAGGCAAGAGCAAGGAGCTGGTGGATGAAGCTATC  
CGCTGTAAGCTGAAGATCCTGCAGAATGATGGCGTCGTTAACAGTCCGTG





AGAGCCTGC

ACCGAGCGCCCTACTATTTTCCTGCTGGACCTGTGCGCCTCTGATATCCTG  
CGCTCCGCCATCTGCTTCCCCTTTGTCTTCACCTCGGTCAAGAATGGATC  
TGCTGGACCTATGGCACGCTGACCTGCAAAGTGATCGCCTTCTGGGTG  
TGCTCTCCTGTTTCCACACGGCGTTTATGCTATTCTGTGTAAGTGTGACA  
CGCTACCTGGCCATCGCACATCACCCTTCTACACCAAGAGGCTGACCTT  
CTGGACCTGTCTAGCTGTCTATCTGCATGGTGTGGACGTTGTGAGTGGCTA  
TGGCGTTCCCGCCGGTGTAGACGTAGGGACGTACTCTTTTATCCGGGAG  
GAGGACCAGTGCACATTCCAGCACCGTTCCCTCAGGGCGAATGATTCGCT  
GGGCTTCATGCTCCTGCTGGCGCTCATTCTCCTGGCCACACAGCTGGTTT  
ACCTCAAGCTCATTTTCTTTCGTCCACGACCGTGCAGAAAGATGAAGCCTGTC  
CAGTTCGTGCCTGCTGTCAGCCAGAAGTGGACCTTCCATGGGCCAGGCGC  
CAGCGGGCAGGCGGCGGCAACTGGCTGGCTGGATTTGGTTCGAGGCCCA  
CCCCGCCTACTTTGCTGGGCATCCGGCAGAACAGCAATGCAGCGGGCCGC  
AGGCGTCTACTGGTATTGGATGAATTCAAAACAGAGAAGAGGATTAGTAG  
GATGTTCTACATCATGACGTTTTTCTTTCCTGGCACTGTGGGGGCCCTATC  
TGGTCGCCTGCTACTGGCGGGTGTGTTGCAAGGGGCCCTGTGGTCCCTGGG  
GGCTACCTGACGGCAGCGGTGTGGATGAGCTTTGCNNNNNNNNNNNNNNNNNN  
NNNNNNNNNNNGCCAAATCTCGCTTT

CACCTGGCATGGGGACTGGTCTGACGGAGC---GCAGCGTCCCCTACT  
CGGCAACAGCTTGCTATCCCGCAGCAAACCGAGGAGCCACTGTTGCCA  
CCCCCGCAGCGATGGTTTGTACCC---CTGCCAACACCGACTGGAC  
TTTGCTGCCTCGGCATACGACGCCGCT-----GATTTCCGCCGTAA  
CGCGGCCACCTTGCTGTCTTACGACGGCCGGAGTGAAGGCTC-----  
TTCCCTGCCGACTGCAGGCTGCTCCAACCGGCTCTTGGCTATTACGCA  
GACCCGTAG---GCTGG---GGAGGACGCACGCCGCCGAGTACTGTAG  
TGTAATAGCAAATCCAGCTCGGTCTTTTCTGCTGGCCCGCTAATCTA  
TCGGTGGCAGAGCAGGCA---CC---AACTACCTGG-----CGGAG  
GA---GGGA---GACTC---CATCCCGACAGAGAGGTCACCG---AT---  
CGGCGCTCGGAGGAG---ACCAAACCCAAAGACCTGAC---ATCAGA--  
-GTCGAGCTGGATAGAG---ACGCCGTCTCCATTAAAGTCTATTGATTCA  
AGCGATTCTGGTATCTTTG---AACAGGCCAAAAGGAGAAGAATCTACC  
TTCTGCCACGCCG-----GTTTCAGAGACAGTGTCCCCGTTGAAAT

CGGAGNNNNNNNNNNNNNNNNNNNNNNNNNNNNNNNNNNNNNNNNNNNNNN  
NNNNNNNNNNNNNNNNNNNNNNNNNNNNNNNNNNNNNNNNNNNNNN---  
NNAGACGGCGTTTTTCTCCAGGCG---CCCGGCTAC---GCAG  
CAGCCGCCCTGGGA---CACCATCA-----CCACCCGACCCACGTTGGC  
TCT---TACTCCACGGCGGCTTTCAACTCCACCAGGGACTTTCTCTTCAG  
AAATCGGGGTTTTCGGGGACGCCACCGG-----GGCGCAGCACA  
GTTTGTTCGCCTC-----CGGAAGTTT---C-----GCAGGGCCA  
CATGGACTCAGATGCAGCGGGGCACCTGCTCTTCCAGGGCTCCACGA  
G---CAAGCGGCGAGCCATGCGTCTTCCAACGTGGTCAACAGCCAGATGC  
GGCTGGGCTTCTCGGGGACATGTACGGACGGGCCGACCAGTACGGCCAC  
GTTACAAGCCCAGGTT---CCGACCACTATGCTTCGACCCAGTTGCACGG  
CTATGGCCCCATGAACATGAATATGGCCGCA---CACCACGGAGCAGGGG  
CCTTCTTTTCGATACATGAGGCAGCCGATCAAACAAGAGCTCATCTGCAAG  
TGGATCGAGCCGGAGCAGCTGACGAATCCCAAAAAGTCTGTGCAACAAAAC  
TTTTAGCACGATGCACGAGCTTGTGACCCACCTGACGGTGGAGCATGTGG  
GGGACCGGAGCAGACCAACCACATCTGCTTCTGGGAGGAGTGCGCCAGA  
GAAGGAAAACCATTCAAAGCCAAATACAACTTGTAAATCACATCAGAGT  
ACACACCGGAGAAAAGCCCTTCCCGTGTGCGGTTNNNNNNNNNNNNNNNN

>*Pseudopleuronectes americanus*  
AGTCTGCTCATTTCGAGCAGAACTAAGCCAACCCGGGGCTCTCCTGGGAGA

CGACCAAATTTATAATGTAATCGTCACCGCACACGCCTTTGTAATAATCT  
TCTTTATAGTAATAACCAATTATGATCGGAGGGTTCGGAAACTGACTTATT  
CCATTAATAATTGGGGCCCCCGATATGGCCTTCCCTCGAATAAATAACAT  
GAGTTTCTGACTCCTACCCCATCCTTTCTCCTCCTTCTAGCCTCTTCAG  
GCGTCGAAGCTGGGGCAGGGACAGGATGAACCGTGTATCCCCACTAGCT  
GGAAATCTAGCACACGCCGGAGCATCAGTAGACCTCACCATTTTCTCCCT  
CCACCTTGCCGGAATTTTCATCAATTCAGGGGCAATCAACTTTATTACTA  
CTATCATCAACATGAAACCAACAGCAGTCACTATGTACCAAATCCCCTA  
TTTGTCTGGGCCGTAATACTACTGCCGTCTTCTTCTTCTTTCCCTACC  
CGTCTGGCCGCTGGCATTACAATGCTACTGACAGACCGCAACCTAAACA  
CAACCTTCTTTGACCCTGCCGGAGGGGTGACCCCATCCTCTACCAACAC  
CTA-----  
-----  
-----  
-----

-----TTCTAGAGAGAAACCTTCATCCGACTAACTGTCCTTGG  
CATGTTGTTACTCTCTGATGCCACCAGTGCACCAAGCTGTTCGGAGCTCT  
CCTGGGGCATGTGCCCTCAGCAACTTCCCAGCTATTTGCAAGACAGAGGAC  
TTCTCCAATTGCCCAAAGATATGGTGGTGCAGCTTTTGTACACAGAGGA  
GCTAGAGACCGAAGATGAGAAACTTGTATGAAGCTGCTCTAAACTGGA  
TCAACTATGATGTGGAAAAGAGGCACCTGCCACCTACCGGAGCTTCTGAAA  
ACGGTCCGCCTCGCCCTGCTGCCGGCCATCTTTCTGATGGAGAATGTCTC  
TACAGAAGAGTTGATCAATGCCAGGCCAAGAGCAGGGAACCTGGTGGATG  
AAGCTATCCGCTGTAAGCTGAAAATCCTGCAGAATGATGGTGTGTAAC  
AGCCCCGTGTGCACGACCAAGAAAACCAGCCATGCTCTCTTTCTACTCGG  
AGGGCAGACTTTCATGTGTGACAAGTTGTACCTGGTAGACCAGAAGGCCA  
AAGAGATCATCCCCAAAGCCGACATCCCAGCCCCAGGAAGGAGTTCAGT  
GCCTGCGCCATCGGCTGTAAGGTGTACATCACCGGTGGGA--GAGGCTC-  
AGAGAACGGTGTGTCTAAAGATGTATGGGTCTACGACACTGTCCAAGAGG  
AGTGGTCCAAAGCAGCTCCAATGCTCATCGCCAGGTTTGGCCATGGTTCT  
GCAGAGTTAAAACATTGCCTCTATGTAGTAGGGGCCACACTGCAGCAAC  
TGGCTGCCTCCCGGCTTCTCCCTCCGGATGATTACATTGTTGTGTTTCAGT  
CGATCAACAACAAGGCTGATACTTAATGAGGCAGAGCTAATTATGGCACT  
GGCCCAGGAGTTCCAAATGAGAGTAGTCACAGTATCCCTGGAGGAACAGT  
CATTTCCCTAGTATAATCCAGGTGATCAGTGGTGTCTCCATGTTAGTCAGC  
ATGCATGGAGCTCAGCTTATTACCTCACTGTTTCTCCCCAGAGGAGCTGC  
TGTGGTGGAACTGTTCCCTTTGCTGTGAACCCAGAGCAGTACACACCTT  
ATAAAACCCTTGCCCTCCCTTCCAGGCATGGACCTTCATTATATCTCCTGG  
AGGAACACCAAGGAGGAAAACACCATTACCCACCTGACAGACCTTGGGA  
GCAAGGAGGTATTGCTCACTTAGAAAAGGAGGAGCAGGAGCGAATATTGG  
CCAGTAAGGATGTTCCAGGCACCTCTGCTGTGCGCAACCCAGAGTGGCTT  
TTCCGGATCTACCAGGACACTATGGTGGACATCCCATCCTTTCTGGAAGT  
CCTCAA---AGAGGGCAGGAAG---ACCAAGCCAGCTTGAAGAA---GT  
CAAAGCCGGCTAGCACAGTCCACCCAGGCCGAGTCAGAGAACCCCAATGT  
CAGACCACAGTACAAACCACTAATGAGGCTAAACTCACAGTATCCTGGCA  
GATCCCATGGAATCTAAAATACCTAAGGTAAGAGAGGTGAAGTATGAGG  
TGTGGATCCAGAAGAAAGACACCAGCAAGGGAACACTGGAGGACCAGATC  
ATCCAGGCCAATCCTGCCCTGGAGGCCTTCGGCAACGCCAAAACACTGAG  
AAACGACAACCTCTCTGTTTTGGAAAATTCATTCGAATTCACTTTGGTA  
CGAGYGGCAAACCTGTCATCTGCCGACATCGAGACGTACCTGCTGGAGAAG  
TCACGCATCACTTTCCAGCTTAAGGCTGAGAGGAACTATCACATTTTTTA  
CCAGATCCTGTCCAATCAGAAGCCAGAGCTGCTGGACATGCTGCTGATCA  
CCAACAACCCGTATGACTACTCCTACATCTCCCAAGGAGAGGTAACCGTA

GCCTCCATCGACGACTCGGAGGAGCTGATGGCCACCGACAGTGCCTTCGA  
TGTGCTGGGCTTCACTCCAGAAGAGAAGATGGGTGTCTATAAACTTACTG  
GTGCCATCATGCACTACGGCAACATGAAGTTCAAAACAGAAGCAGCGTGAG  
GAGCAGGGTGAACCTGACGGGACGGAAGCTGCTGATAAATCAACCTACCT  
GATGGGGCTGAACTCTGCCGACCTCATCAAGGGCTGTGTTCATCCCAGGG  
TCAAGGTAGGAAATGAATATGTCACCAAAGGCCAAAGTGTGGACCAAGTC  
TACTACCCCAATAAGGAGGCCTTCAAGTGTGAGGAGTGTGGGAAGCACTA  
CAACACCAAGCTGGGATACAAGCGCCATATGGCCATGCACTCTGCCACGG  
CAGGGGACCTCACCTGCAAAGTGTGCATGCAGAGCTACGAGAGTACGCCT  
ATTCTCCTGGAGCACCTGAAGAGTCACTCCGGGAAGTCGTCAGGTGGCAC  
CAAGGAGAAAAAACACCCGTGTGACCCTGTGACCGTCGCTTCTACACAA  
GGAAGGATGTGAGACGGCACATGGTGGTCCACACAGGCCGCAAGGACTTC  
CTGTGCCAGTACTGTGCCAGCGCTTTGGCAGGAAGGACCACCTGACACG  
CCATGTGAAGAAGAGCCACTCACAGGAGCTAATGAAGATCAAGACAGAGC  
CACCAGACATGTTAGGTCTTTTAGCTTCCGGATCCCCGCCCTGCTCTGTG  
AAGGAGGAGCTCAGTCCAATGATGTGCGGCATGGGTCCCAACAAAGATCC  
AATGATGGGCAAACCTTTCCCCAGTGGGGCCCTTTTCCAATGGGCATGT  
ACAACCCCCACCAT-----CTCCAGGCAATGTCTAATACGGGGGTGGGT  
CACCCA-----CACCCGTCCCTAATGCCAGTTCCTTGTCTGCAAATAT  
GGGCATGGGCTGCCACATGGAANNNNNNNNNNNNNNNNNNNNNNNNNNNTGTTTACAGATCAGT  
GATGGATCAAACA  
TTGTGAACCTGCTGGCTAGTAACTCTCCAAGTGTTCGTATGCTATGACC  
CAGCAGAAATACTTCAGCAACTACAGTCCTGTGATTGGATTTTACATTTA  
CGAGCCCATTGAGTACTGGAAGTCCACAGTGCAGGAGCATCTGAAGACTC  
TGAGTCATGGCTTCAACAAGATCTCCTGGATGGACAACTTTTTCCACTAC  
CTGCGGGTGGTGAATGTGAGTGCATCAACCAAGACCGACTTCATCACCAT  
CCTCAAGGGCTCCTTCCCTGCGCAGCCCAGAGTACCAGCACTTCACTGAGG  
ACATCATATTCTCCAAGA---ACCGTGAGACTG-----ATGAGTATGAC  
ATTATCGCCTCACGSATGTACCTGGTGGCACGGACGACAGAGAAGAAGCG  
TGAGGAGGTGGTGGAGCTTCTGGAGAAGCTTCGTCATTGATGCTGATCA  
ACAGCATCAAGTTCATTGCCCTTCAATCCACATTTGTGTTTATGGACCGC  
TACAGCTCCTCTGTCATCTCGCCCATCCTTACCTCAGGCTTCAGCGTACT  
CACCATCCTCATCCTCACTTTCTTCTGGTTCATCAACCCCTTGGNNNNNNNNNNNNNNNNNNNNNNNN  
NNNNNNNNNNNNNNNNNNNNNNNNNNNNNNNNNNNNNNNNNNNNNNNNNNNNNNNNNNNNNNNNNN  
NNNNNNNNNNNNNNNNNNNNNNNNNNNNNNNNNNNNNNNNNNNNNNNNNNNNNNNNNNNNNNNN  
CGCTCTTTCAAATGTGTCCACCTCTTGCAATGTTGGCATTATTAACGGGA  
CTTCTGGATGGACTTCTCGGTGGACGACTCCCCGACTGAGACCGTCACT  
CGGCGGTTTCGCTATGATGTGTCACTGGTGTGAGCATTAAAGGACCTGGA  
GGAGGACATCATGGAGGGGCTGATAGAGGCTGGGATGGAAGACAGTGCTT  
GCACCTCAGGCTTTAGTGTGATGATCAAGGAATGCTGTGACGGCATGGGC  
GATGTCAGCGAGAAGCACGGCGGAGGACCGGCTGTTCGAGAGAAGGTTGT  
GCGTTTCTCCTTACCGTTATGTCTGTCTCTGTCTTGGCCGACGGTGAAG  
AC-----AGGGAGGTCAACATCTTC  
ACTGAGCCAAAGCCAAACTCAGAGCTGTCTGTAAAGCCCCTTTGCCATGAT  
GTTTGTGGATGAGTCCGACCACGAGACCCTCACAGCCGTCCTGAGGCCTA  
TCGTCGCAGAGCGTAATGCAATGAAAGAGAGCAGGCTCATCCTATCCATC  
GGTGGCCTGCCTCGCTTTTTTCCGCTTCCGCTTCCGAGGCACGGGATACGA  
TGAGAAGATGGTGCAGAGATGGAGGGCCTGGAGGCCTCGGGCTCTACAT  
ACATCTGCACTTTGTGTGACTCAAGTGCAGCCGAGGCTTCTCAAAACATG  
GTGCTGCATTCCATCACCCGCTGTGATGAGGAGAACCTTGACCGGTACGA  
AATATGGAGAACGAACCCTTTCTCTGAGTCTGTAGACGAGCTGCGGGACC  
GAGTCAAAGGCGTCTCGGCCAAGCCCTTCTTGGAGACCCAGCCCACAATG  
GATGCGTTACACTGTGACATTGGCAATGCCACTGAGTTTTTACAAAATCTT  
CCAGGACGAGATCGGGGAGGTGTACAACAAGGT---CAAG---CCCAGCC

GGGAGGAGCGGCGCAGCTGGAGGGCAGCCCTTGATAAACAGCTGAGGAAG  
AAGATGAAGCTCAAACCAGTAATGAGGATGAATGGGAACATATGCCCCGAAA  
GCTAATGAGCATGGAGGCTGTGGAGGTGGTGTGTGATCTGGTGCCCTCAG  
AGGAGAGGCGGGAGCCCCTCAGGGAGCTGATGAGGCTCTACCTCCAGATG  
AAGCCTGTGTGGCGGCCACCTGTCCAGCCAAGGAATGCCCGACCAGCT  
GTGCCGCTACAGCTTCAACTCCCAGCGCTTCGCCGACCTCCTGTCTCTA  
CCTTCAAATACAGGTACAACGGCAAGATAACCAACTACCTCCACAAGACC  
CTGGCCACGTGCCTGAGATCATAGAGAGAGACGGATCCATCGGAGCGTG  
GNNNNNNNNNNNNNNNNNNNNNNNNNNNNNNNNNTCATACTCCATCGACATGGGTCTTCGGGACCCCTGTGG  
AAGCAAGCC

CACAGCCTTTTCGCTGCTCAATTGAAGACCCCATAAAACAGTCAAAATTC  
AAGGGCATCAAGACCTACATCTCTTACCGGGTCACGCCGAGCCACACAGG  
GCGTCCCCTCTACAGACGCTACAAACACTTTGACTGGCTGTACAACCGCT  
TACTGCACAAGTTCACTGTGATCTCTGTGCCCCACCTGCCTGAGAAGCAG  
GCCACGGGGCGATTTGAGGAGGACTTCATCGAGAAGCGCAAGAGACGACT  
GGTACTGTGGATGAACCACATGACCAGTCACCCGGTCTCTCTCAGTATG  
AAGGCTTTGAGCACTTTCTAATGTGCGCTGACGACAAACAGTGGAAACTT  
GGAAAGAGACGGGCGGAGAAGGACGAGTTGGTGGGCGCACATTTTCATGCT  
GACCTCCAGATCCCCAACGAGCACCAGGACCTTCAGGATGTAGAGGAGC  
GGGTGGACACCTTCAAGTCTTTGCTAAAAAAATGGAYGACAGTGTGATG  
CAGCTCACACATGTTGCCTCGGAGCTGGTGCCTAACACCTGGGTGGGT  
CAGGAAGGAGTTCAGCGGCTGGGAAATGCCTTCCAGTCCATCAGCCTGG  
CTTTTCATGCTGGACCCTCCCCACAGCTCAGACGCCCTCAACAACGCCATC  
TCCCACNNNNNNNNNNNNNNNNNNNNNNNNNNNNNNNTGGGTTTCATCATCGGCGTCGGCGTGGTCCGAA  
ACCTCCTGATC

TCCATCCTGTGGTCAAAGACAAGAGCCTGCACCGGGCGCCCTACTATTT  
CCTGCTGGACCTGTGCGCCTCCGACATCCTGCGCTCCGCCATCTGCTTTC  
CCTTCGTCTTCACTTCGGTCAAGAATGGGTGACCTGGACGTACGGCAGC  
CTGACCTGCAAGGTGATCGCCTTCTGGGTGTCCTCTCCTGTTTCCACAC  
GGCGTTCATGCTGTTCTGCGTCAGCGTCACCCGCTACCTGGCCATCGCTC  
ATCACCGTTTTCTACACCAAGAGGCTGACCTTCTGGACCTGCCTCGCCGTC  
ATCTGCATGGTGTGGACGTTGTGCGTGGCTATGGCCTTCCCGCCAGTGT  
AGATGTAGGGACGTACTCTTTTATCCGGGAGGAGACCAGTGCACATTCC  
AGCACCGCTCCTTCAGGGCGAACGATTCACTGGGCTTCATGCTCCTGCTG  
GCGCTCATCCTCCTGGCCACACAGCTGGTTTACCTCAAGTTCATCTTCTT  
CGTACACGACCGTCGAAAGATGAAGCCTGTCCAGTTCGTGCCTGCCGTCA  
GCCAGAACTGGACCTTCCACGGGCCGGGGCCAGCGGGCAGGCGGGCC  
AACTGGCTGGCTGGATTTGGCCGAGGCCCCACCCCGCCTACTTTGCTGGG  
CATCCGGCAGAACAGCAACGCAGCGGGCCGAGGCGTCTGCTGGTGTAG  
ATGAGTTCAAAACGGAGAAGAGGATTAGTAGGATGTTCTACATCATGACG  
TTTTTCTTCTGGCTTTGTGGGGGCCCTATCTGGTGCCTGCTACTGGCG  
GGTGTGTGCAAGGGGCCCGTGGTCCCTGGGGGCTACCTGACGGCAGCCG  
TGTGGATGAGCTTTGCCAAGCTGGGANNNNNNNNNNNNNNNNNNNNNNNNNNNNNNNNGCCAAATC  
TCGCTTTCACCCTGG

CGTGGGACTGGTCTTGGCACGGAGC---GCAGCGTCCCACTCGGCAACA  
GCTTGCTATCCCCGAGCAAAGCGAGGATCCCACTGTTGCCTCCCACCCG  
CAGCGATGGTTTGTACCC---CTGCCAACAACCGACTGGACTTTGCCGC  
CTCGGCATACGACGCCGCC-----GATTTCCGCCGTAACGCGGCCA  
CCTTGCTGTCTACGCGGCGGCCGGAGTGAAGGCTC-----TCCCGCTG  
CCGACCGCGGGCTGCTCCAACCGGCTCTTGGCTATTACGCAGACCCGTC  
GG---GCTGG---GGAGGACGCACGCCGCCGAGTACTGTGGGGTGAACA  
GCAAGCCCGGCTCGGTGTTCTCCTGCTGGCCCGCAACTCCCTCGGCGGC  
AGGGCGGGCG---CC---AACTACCTGG-----CCGAGGA---GGT

G---GACTC---CATCTCGACGGAGAGGTCGTCC---AT---CGGCGTCC  
CGGAGGAG---GCCAAACCCAAAGACATGAC---GTCCGA---GTCGAGC  
TGGATAGAG---ACGCCGTCTCCATTAAGTCCATCGACTCGAGCGACTC  
TGGGATCTTCG---AACAGGCCAAGAGGAGGAGGATCTCCCCGTCTGCCA  
CCCCG-----GTGTCAGAGACTGNNNNNNNNNNNNNNNNNNNNNCATCACTCAACAGGCCAAGTCAC  
GGAGAGAGAAGTGGCGTTGGGGATAAATCCGTTTCGCAGATGGGATGGGCG  
CCTTCAAATAAAACCACAGCTCCCACGATCTCGGCTCCGG---ACAGACG  
GCGTTCCTCCAGGCG---CCCGGCTAC---GCTGCAGCCGCCCTGGG  
A---CACCATCA-----CCACCCGACCCACGTTGGCTCT---TACTCCA  
CGGCGGCGTACAACCTCCACCAGGGACTTTCTGTTTCAGAAATCGGGGCTTC  
GGGGACGCCGCCGG-----GGCGCAGCACAGTTTGTTCGCCTC  
-----TGGAAGTTT---C-----GCGGGGCCACATGGACACTCCG  
ATGCGGCGGGGACCTGCTCTTCCCGGGGCTCCACGAG---CAGGCGGCG  
AGCCATGCGTCTCCAACGTGGTCAACAGCCAGATGCGGCTGGGCTTCTC  
GGGGGACATGTACGGACGCGCCGACCAGTACGGCCACGTTACGAGCCCGC  
GGT---CCGACCACTACGCCTCCACCCAGCTGCACGGCTACGGCCCCATG  
AACATGAATATGGCCGCG---CACCACGGAGCCGGGGCCTTCTTTTCGATA  
CATGAGGCAGCCGATCAAGCAAGAGCTCATCTGCAAGTGGATCGAGCCGG  
AGCAGCTGGCGAACCCCAAAAAGTCGTGCAACAAAACTTTTAGCACGATG  
CACGAGCTGGTGACCCATCTGACCGTGGAGCATGTGGGGGGACCCGAGCA  
GACCAACCACATCTGCTTCTGGGAGGACTGCCCCAGAGAGGGGAAGCCGT  
TCAAAGCCAAATACAAACTTGTGAATCATATCAGGGTGCACACGGGAGAA  
AAGCCTTTCCCTGTCCGTTCCCCGGCTGTGGCAA

>*Pseudoscopelus* sp

AGCCTGCTTATCCGGGTGAACCTAAGCCAACCTGGCGCCCTTCTTGGGGA  
CGACCAGATTTATAATGTAATTGTTACGGCACACGCTTTCGTAATGATTT  
TCTTTATAGTAATGCCAATTATAATCGGGGGCTTCGAAACTGACTTATC  
CCTCTGATGATTGGGGCCCTGACATGGCATTCCCCGAATAAATAACAT  
AAGCTTTTGACTTCTCCACCTTCTTTCCTTCTGCTTTTGGCTTCTCTG  
GAGTTGAAGCAGGGGCTGGTACCGGGTGAACAGTTTATCCGCCTCTGTCT  
GGTAACCTCGCCACGCCGGAGCATCCGTAGACCTAACTATCTTTTCACT  
ACATTTGGCGGGGGTCTCCTCTATCTTGGGGCCATCAACTTTATTA  
CAATTATTAATATGAAGCCGGCAGCTATCTCACAGTACCAAACACCTCTA  
TTTGTGTTGAGCCGTTCTGATTACAGCTGTCTTACTCCTGTTGTCCTGCC  
AGTTCTAGCAGCAGGTATTACAATACTACTTACTGACCGGAACCTAAATA  
CAACGTTCTTTGACCCTGCAGGCGGTGGAGATCCAATTCTTTACCAGCAC  
TTGTCTGGTTTTTTCGGCCACCCAGAAGTCTACATCTTATTCTTCCCGG  
ATTCGGAATGATCTCACATATTGTGCGCTACTACTCAGGCAAAAAAGAGC  
CTTTTGGGTATATAGGAATGGTGTGAGCTATGATGGCCATCGGACTACTA  
GGTTTCATCGTCTGAGCCACCACATGTTCACTGTAGGTATAGACGTTGA  
CACCCGAGCATATTCCTGGAGAGAAACCTTACCCGACTAACTGCCTCGG  
CATGCTGTTGCTGTCTGATGCCCACCAGTGCACCAAGCTGTCAGAGCTCT  
CTTGGGGAATGTGCCCTCAGCAACTTCCCGGCTATTTGTAAGACAGAGGAC  
TTCTCCAACCTGCCCAAAGATATGGTGGTGCAGCTTTTGTACACGAGGA  
GCTGGAGACAGAAGATGAGAGACTGGTTTATGAAGCTGCCCTGAATTGGA  
TCAACTATGACCTGGAAAGGAGGCACGTGCACCTTCCAGAGCTCCTGAGA  
ACAGTCCGCCTTGCCCTGCTGCCTGCCATCTTTCTCATGGAAAATGTCTC  
GACAGAAGAGCTGATCAACGCCAGGCCAAGAGCAAGGAGCTGGTGGACG  
AGGCTATCCGCTGTAAGCTGAAGATCTTGCAGAATGACGGCGTCGTTAAC  
AGCCCATGTGCTCGACCACGAAAAACCAGCCACGCTCTCTTTTGTGTTGG  
AGGGCAGACTTTCATGTGTGACAAGTTGTACCTGGTGGACCAGAAGGCCA  
AAGAGATCATCCCGAAGGCGGACATTCAGCCCCAGGAAGGAGTTCAGC  
GCCTGTGCCATTGGCTGTAAGGTGTACATCACCGGCGGCA--GAGGCTC-



AGAGAATGGTGTGTGCCAAAGATGTGTGGGTCTATGACACCATCCATGAGG  
AATGGTCCAAAGCGGCGCCCATGCTCATCGCCAGGTTCCGGTCACGGCTCT  
GCTGAGCTGAAACACTGCCTGTACGTGGTAGGAGGTCACACCGCAGCAAC  
TGGCTGCCTCCCTGCTTCTCCCTCCGGATGAATACATCGTTGTCTTCAGT  
CGTTCAACAACGAGACTGATACTGAACGAACCCGAGCTAATCATGGCTCT  
GGCCAGGAGTTCCAGATGAGAGTTGTCACAGTTTCCCTAGAGGACCAGT  
CTTTCCCTAGCATTGTCCAGGTGATCAGCAGTGCTTCCATGTTAGTCAGC  
ATGCATGGAGCTCAGCTTATCACCTCACTCTTCCCTCCCAAAGGAGCTAC  
TGTGGTGAAGTGTCCCTTTGCTGTGAACTCAGAGCAGTACACCCCAT  
ATAAAACCCTTGCCCTCCCTTCCAGGAATGGACATTCATTATATTTCCCTGG  
AGGAATACTCAGGAGGAAAACACTGTCACCCATCCAGACAGACCCTGGGA  
ACAAGGAGGCATCACTCACTTGGAGAAGGAGGAGCAGGAGCGAATACTGA  
GCAGCAAAGATGTCCCAGGCACCTGTGCTGCCGCAACCCGGAGTGGCTA  
TTCCGAATCTATCAGGATACATTGGTAGACATTCCCTCCTTCCCTGGAAGT  
CCTCAA---TGAGGGAATGAAG---ACCAAGCCAGCTTGAAGAA---GT  
CCAAGTCAGCTAGTACAGTCCATCCAGGCCGGGTCCAGAGAAGCCAGTGT  
CAGACCTCAGTACAGACCACCAATGAGGCTAAACTCACAGTCTCCTGGCA  
GATCCCATGGAATCTGAAATACTTGAAGTAAGAGAGGTGAAGTACGAGG  
TGTGGATCCTGAAAAGAGACACCAGCGAGGGAAGTCTGGAGGATCAGATC  
ATCCAGGCGAACCCGGCGCTGGAGGCCCTTCGGGAACGCCAAAACGCTGAG  
GAACGACAACCTCGTCCCGTTTTGGAAAGTTCATCCGAATTCACTTTGGAA  
ACAGCGGAAAGCTGTGCTCCGCTGACATCGAGACGTACCTGCTGGAGAAG  
TCTCGCGTCACCTATCAGCTCAAGGCCGAGAGGGACTACCACATCTTCTA  
CCACATCCTGTCCAATCGGAAGCCAGAGCTGCTGGACCTGCTGTTAATCA  
CCAACAACCCGTACGACTACTCCTACATCTCCCAAGGAGAGGTAACGGTC  
GCCTCCATCAACGACTCGGAGGAGCTGATGGCCACCGACAGCGCCTTCGA  
CGTGCTGGGCTTACGCCGGAAGAGAAGTCCGGCATCTACAAGCTGACCG  
GCGCCATCATGCACCACGGCAACATGAAGTTCGAAGCAGAAGCAGCGCGAG  
GAGCAGGCGGAGCCGGACGGGACGGAGGCTGCTGATAAATCCGCTTACCT  
GATGGGACTGAACTCTGCCGACCTCATCAAAGGACTGTGTCATCCAGAG  
TCAAGGTCGGAACGAGTACGTACCAAAGGCCAGAGCGTGGACCAGGTC  
CACTAC-----GGAGGCCTTCAAGTGTGAGGAGTGTGGGAAGCACTA  
CAACACCAAGCTGGGATATAAGCGCCATGTGGCCATGCACTCTGCCACGG  
CAGGGGATCTCACCTGTAAAGTGTGCATGCAGAGTTATGAGAGCACCCCT  
GTTCTCCTAGAGCACCTCAAGAGCCACTCGGGGAAGTCCCTCGGGTGGAGC  
CAAGGAGAAAAAGCATCCGTGTGACCCTGCGACCCGCGTTTCTATACAC  
GGAAAGATGTGAGACGGCACATGGTGGTTCACACAGGCCGAAAGGACTTC  
TTGTGCCAGTACTGTGCCAGCGCTTTGGAAGGAAGACCACCTGACCCG  
CCACGTGAAGAAGAGCCACTCACAGGAGCTGCTGAAGATCAAGACGGAGC  
CTCCTGATATGTTAGGTCTTTTAGCCTCGGGGTACCACCCTGCTCTGTG  
AAGGAGGAGCTTAGCCCCATGATGTGCGGCATGGGTCCCAATAAAGACCC  
CATGATGGGCAAACCGTTCCCAAGTGGCGCCCTTTTCCGATGGGCATGT  
ACAACCCCAACCAC-----CTTCAGGCCATGTCTAATTCTGGGGTGGGT  
CATGCA-----CACCCGTCCCTGATGCCAGCTCCCTGTCTGCAGCTAT  
GGGCATGGGCTGTACATGGAATATCTCATCTACGCCCTCATTCTCATTCA  
TGGGATGTTTACAAATCAGTGACGGATCGAACATGTGAACCTGCTGGCT  
AGTAACTCTCCGAGTGTTCATACGCTCTGACCCAGCAGAAATACTTCAG  
CAACTACAGTCCCCTGATTGGGTTTACATTTACGAGCCCATCGAGTACT  
GGAACTCCACAGTGCAGGAGCACCTGAAGACTCTGAGTCACGGCTTCAAC  
AAGATTTCCCTGGATGGACAACCTTCTTCCACTACCTGCGGGTGGTGAATGT  
GAGCGCGTCGACCAAGAACGACTTCATCACCATCCTCAAGGGCTCCTTCC  
TGCGCAGCCCAGAGTACCAGCATTTCACTGAGGACATCATATTTTCCAAA  
A---ACCGCGAGACTG-----ACGAATATAACATTATCGCCTCACGCTT

GTATTTGGTGGCACGGACCACAGAGAAGAAGCGCGAGGAGGTGGTGGAGC  
TTCTGGAGAAGCTTCGCCCCTTGATGCTGATCAACAGCATCAAGTTCATT  
GCCTTCAATCCCACGTTTGTGTTTCATGGACCGCTACAGCTCCTCCGTCAT  
CTCACCAATCCTGACCTCAGGCTTCAGCGTGCTCACCATCCTCATCCTCA  
CTTTCTTCCCTGGTCAGCAACCCCTTGGGGAACCTTCTGGCTCATCCTCACG  
GTGACGTCCTGGAGCTGGGCGTCTTGGGTTTGATGGGCTTTCACCAGTT  
TGAATGGCAGCCAGCTCTCAAGAATGTGTCTGCATCTTGCAACGTGGGCA  
TTATTAATGGGCTCTCTGGATGGACTTCCTCTGTGGATGACTCCCAGCT  
GACACCATCACTCGGCGGTTTCGCTATGATGTGGCACTAGTGTGAGCATT  
AAAGGATCTGGAGGAGGACATCATGGAGGGGCTGAGAGACAGAGGGATGG  
AAGACATTGCTTGCACCTCAGGTTTCAGTGTATGATCAAGGAATCTTGT  
GATGGCATGGGCGATGTCAGTGA AAAACACGGTGGAGGACCAGCTGTTCC  
TGAAAAGGCTGTACGTTTCTCTATCACTATCATGTCTGTTTC-----G  
GAG-----  
-----CCAAGCCCAACTCAGA ACTGTCTGTAAAGCC  
TCT-TGCTTGATGTTAGTGGATGAATCGGACCATGAGACCCTCACAGCTC  
TCATGGGGCCTATAGTTGCAGAGCGTAATGCAATGAAAGAGAGCAGGCTC  
ATCATTTCAATCGGCGGCCTGCTTCGCTCCTTCCGCTTCCACTTAAGAGG  
CACGGGATATGATGAGAAGATGGTGCCTGAGATGGAGGGCTTGGAGGCCT  
CAGGGTCCAGCTATGCTCTGCACTCTGTGTGATTCCAGTCGGGCAGAGGCA  
TCTCAAAACATGGTGCTACACTCCATCACACGCAGCCATGACGAGAACCT  
TGAACGTTATGAAATATGGAGAACCAACCCTTTTTCTGAGTCAGGAGACG  
AGGTACGGGACAGAGTCAAAGGGGTCAAAGCC-ACCCCTTCATGGAGACC  
CAGCCCACAATGGACGCATTACAATGTGACATGAGCAAGGCCATCGAATT  
CTACAAAATTTTCCAGGATGAAAYWGGGAGGTGTACCACAAGGT---CA  
AT---CCCAGCAGAGAGGAACGGCGGAGCTGGAGGGCAGCCCTAGATAAA  
CAGMTGAGGAAGAAGTTGAAACTTAAACCAATAATGAGGATGAATGGGAA  
CTATGCCCGCAGGSTAATGACTCAGGAGGCTGTGGAGGGCGGTGTGTGAGC  
TGGTGCCCTCAGAGGAGAGGAGGGAGGTCCTGAGGGAGCTTATGAGACTA  
TACATCCAGATGAAGCCTGTGTGGCGCGCCACCTGCCATCCAAGGAGTG  
CCCTGACCAGCTGTGCCGCTATAGCTTTAACTCCCAGAGCTTTGCTGACC  
TCCTCTCTTCTGCCTTCAAATATAGGTACAATGGAAAGATAAGCAATTAC  
CTGCACAAGACTCTGGCCCATGTCCCTGAAATCATAGAGAGAGATGGATC  
CATCGGAGCCTGGGCCAGTGAGGGGAACGAATCTGCAAACAAATCATACA  
CAATTGAGATGGGCCCCGATGGGCCCCAGTGGAAAGGAGAGCCCACAGCCT  
TTTTCTGCTCAGTTGAAGACCCAACAAAACAGACAAAGTTCAAAGGCAT  
CAAGACGTACATTTTCGTATCGGGTCATGCCGAGCCACACAGGGCATCCCG  
TCTACAGGCGCTACAAACACTTTGACTGGCTGTACAACCGCCTACTGCAC  
AAGTTCACTGTGATCTCTGTGCCTCACCTGCCTGAGAAGCAGGCCACGGG  
GCGATTTGAGGAAGACTTTATTGAGAAGCGGAAGAGACGACTGATATTGT  
GGATGAATCACATGACTAGTCACCCCTGTCTCTCCAGTATGAAGGCTTT  
GAGCACTTTCTGATGTGTGCTGATGACAAGCAGTGGAAGCTGGGCAAAAG  
ACGAGCTGAGAAGGATGAGATGGTGGGCGCCATTTTCATGCTGACTCTCC  
AGATCCCTAATGAGCACCAGGACCTTCAGGATGTAGAGGAGAGAGTAGAC  
ACCTTCAAGGCCTTTGCTAAGAAAATGGACGACAGCGTCATGCAGCTCAC  
ACATGTTGCCTCGGAGCTGGTGCCTAAGCACCTGGGTGGATTTCAGGAAGG  
AGTTCCAGCGGCTGGGAAATGCCTTCCAGTCCATTAGCCAGGCATTCATG  
CTGGACCCTCCCATAGCTCAGACACCCTCAACAACGCCTTCTCCCAT--  
-----CTCAACTGACCTCTCTGGGTTTCATCATTGGAGTCCG  
GTGTGGTTGGAAACCTCCTGATCTCCATCCTGCTGGTCAAAGACAAGAGC  
CTTCACCGAGCACCTACTATTTCTGCTGGACCTGTGCGCCTCCGATAT  
CCTTCGCTCCGCCATCTGCTTCCCTTTGTCTTACCTCGGTCAAAGAAATG  
GATCTGCCTGGACGTATGGCACGCTGACCTGCAAAGTGATCGCCTTCTCTG

GGTGTGCTCTCCTGTTTCCACACGGCGTTCATGCTATTCTGCGTGAGCGT  
CACCCGCTACCTGGCCATCGCCCACCACCGTTTCTACACCAAGAGGCTGA  
CCTTCTGGACCTGTCTGGCTGTCTGCATGGTGTGGACGTTGTCAGTG  
GCTATGGCGTTCCACCAGTGCTAGACGTAGGGACATACTCTTTTATCCG  
GGAGGAGGACCAGTGCACGTTCCAGCACCGCTCCTTCAGGGCGAATGATT  
CGCTGGGCTTCATGCTCCTGCTGGCGCTCATTCTCTTGGCCACACAGCTG  
GTTTACCTCAAGCTCATCTTCTTCGTCCACGACCGTCGAAAGATGAAGCC  
TGTCAGTTTGTGCTGCTGTGTCAGCCAGAAGTGGACCTTCCACGGGCCAG  
GCGCCAGCGGGCAGGCGGGCGGCAACTGGCTGGCCGGATTTGGTAGAGGC  
CCCACCCCGCTACTTTGCTGGGCATCCGGCAGAACAGCAACGCAGCAGG  
CCGCAGGCGTCTACTGGTATTGGATGAATTCAAAACAGAGAAGAGGATTA  
GTAGGATGTTTACATCATGACTTTTTTTCTTCTGGCACTGTGGGGGCC  
TATCTGGTGCCTGCTACTGGCGGGTGTGTTGCAAGGGGCCCTGTAGTCCC  
TGGAGGCTACCTGACGGCAGCCGTGTGGATGAGCTTTCGCGCAGGCTGGGG  
TCAAATCCATTCAT-----GCCAAATCTCGCTTT  
CACCTTGGCGTGGGGACTGGTCTTGGCACGGAGC---GCAGCGTCCCCT  
CGGCAACAGCTTGCTATCCCCGAGCAAACCGAGGAGCCCCTGTTGCCA  
CCCCCCGCGCAGCGATGGTTTTGTACCC---CTGCCAACAACCGACTGGAC  
TTTGCTGCCTCGGCATACGACGCCGT-----GATTTGCGCCGGTAA  
CGCAGCCACCTTGCTGTCTTATGCAGCGGCCGGAGTGAAGGCTC-----  
TTCCCTGCGCGCCGAGGCTGCTCCAACCGACCTCTTGGCTATTACGCA  
GACCTTTCAG---GCTGG---GGAGGACGCACGCCCGCCGAGTACTGCGG  
CGTAAATAGCAAAACCAGTTCGGTCTTTTCTGCTGGCCCGCTAACTCTA  
TCGGCGGCAGAGCAGGCA---CC---AACTACCTGG-----CCGAG  
GA---GGGA---GACTC---CATCCCGACGGAGAGGTCGCC---AT---  
C---GGCTCCGAGGAG---ACCAAACCCAAAGACATAAC---ATCAGA--  
-GTCGAGCTGGATAGAG---ACACCGCCCTCCATTAAGTCCATTGATTCA  
AGCGATTCTGGTATCTTTG---AACAGGCCAAGAGGAGAAGAATCTCACC  
CTCTGCCACGCCA-----GTTTCAGAGACAGTGTCCAGTTAAAAT  
CTGAGCATCACTCAACAGGAAAATCACAGASAGAGAAGYGGCGKTGGGG  
ATAAATCCGTTTCGAGATGGGATGGGCGCCTTCAAATAAAMMACAGCTC  
CCACGATGTGAGCTCCGG---ACAAACGGYGTTCYTCAGGCA---C  
CAGACTAC---GCAGCAGCCGCCCTGGGA---CACCCGA-----CCAC  
CCGACCCACGTTGGCTCT---TACTCCACGGCGGCTTTCAACTCCACCAG  
GGACTTTCTCTCAGAAATCGGGGGTTCGGGGACGCCACCGG-----  
----GGCGCAGCACAGTTTGTTCGCCCTC-----CGGAAGTTT---C  
-----GCAGGGCCACATGGACTCAGATGCRGCAGGGCACCTGCTCTT  
CCCGGGCTCCACGAG---CAAGCGGCGAGCCATGCGTCTTCCAACGTGG  
TCAACAGCCAGATGCGGCTGGGCTTCTCGGGGGACATGTACGGACGGGCT  
GACCAGTACGGCCACGTTACGAGCCCGAGGT---CCGACCACTACGCTTC  
GACCCAGCTGCACGGCTATGGCCCCATGAACATGAATATGGCCGCA---C  
ACCACGGAGCAGGGGCCCTTTTCGATACATGAGGCAGCCGATCAAACAA  
GAGCTCATCTGCAAGTGGGTCGAGCCGGAGCAGCTGACGAATCCCAAAA  
GTCGTGCAACAAAACTTTTAGCACGATGCATGAGCTAGTGACCCATCTGA  
CGGTGGAGCATGTGGGGGACCGGAGCAGACCAACACATCTGCTTCTGG  
GAAGAGTGCTCCAGAGAAGGGAAGCCATTCAAAGCCAAATACAAACTTGT  
GAATCATATCAGAGTACACACCGGAGAAAAGCCCTTCCCGTGTCCGTTCC  
CCGGCTGTGGCAAA

>*Pseudotrichonotus altivelis*  
AGCCTTCTTATCCGAGCAGAACTTAGCCAACCAGGGGCCCTCTTGGGAGA  
CGACCAAATCTACAACGTTATTGTTACCGCACATGCTTTTGTAAATAATCT  
TCTTTATAGTAATACCAATTATGATTGGTGGATTTCGGAAACTGACTGATC  
CCCCTCATGATTGGAGCCCCTGACATAGCCTTCCCTCGTATAAATAACAT

AAGTTTTTGACTTCTTCCCCATCTTCTTATTACTTCTTTCTCCTCCTCAG  
CAGTAGAAGCTGGTGCCGGCACC GGCTGAACCGTACCCACCTCTTGCC  
AGCAACCTAGCCCACGCCGGGGCTCAGTAGACCTAACAATCTTTCTCT  
TCATCTGGCAGGAATCTCCTCAATCTTGGAGCCATCAACTTTATTACAA  
CTATTATTAATATAAAAACCACCAGCAATTACCCAATACCAAACCCCTA  
TTCGTATGAGCCGTCTTATTACAGCTGTTCTCCTCCTCCTATCCCTCCC  
GGTGCTTGCTGCTGGAATTACAATGCTCCTTACAGATCGGAACCTAAACA  
CTACCTTTTTTCGACCCGGCAGGAGGGGACCCAATCCTTTACCAACAC  
CTATTCTGATTCTTTCGGCCACCCCGAAGTCTACATCCTCATCCTGCCTGG  
CTTTGGAATAATTTCCACATCGTAGCCTACTACGCAGGCAAAAAAGAAC  
CCTTTGGCTACATAGGAATAGTGTGAGCAATAATAGCAATCGGACTTTTA  
GGGTTCAATTGTATGAGCCACCACATATTCAGTGTGGGATAGACGTAGA  
CACCCGAGCCTATTCCTCGAGAGGAATCTGCACCCATCCAAGTGCCTCGG  
CATGCTGCTGTTATCAGACGCCACCAGTGTACAAAGCTGTCAGAGCTGT  
CCTGGGGTATGTGCCCTCAGCAATTTTCTGCCATCTGCAAGACAGAGGAC  
TTTTCTCCAGTTGCCTAAAGACATGGTAGTGCAGCTTCTGTCCCACGAGGA  
ACTAGAAACAGAAGACGAGAGACTGGTTTACGAGGCTGCCCTTAATTGGG  
TCAACTATGACCTAGAGAGAAGGCATTGCAACCTGCCAGAAGTGCCTGAGA  
ACTGTGCGCCTGGCCTTGCTTCCCTGCCATCTTCTCATGGAGAACGTCTC  
CACAGAGGAGTTGATCAATGCCCAGGACAAGAGCAAGGAGTTGGTGGATG  
AGGCAATCCGCTGCAAAGTGAAGATCCTGCAAAATGACGGAGTGGTCAAC  
AGTCCCTGTGCCCGCCCAAGAAAGACCAGCCATGCCCTCTTCTGCTGGG  
GGGGCAGACCTTCATGTGTGATAAGCTGTACTTGGTGGACCAGAAGGCCA  
AAGAGATCATCCCCAAAGCTGACATCCCCAGCCCCAGGAAGGAGTTCAGC  
GCCTGTGCCATTGGCTGTAAGGTCTATGTTACGGGTGGGA--GGGCTC-  
AGAGAATGGTGTGTCTAAAGACGTGTGGGTTTATGACACTGTTTCATGAGG  
AGTGGTCCAAGGCCGCACCAATGCTCATCGCCAGGTTTGGCCATGGCTCT  
GCTGAACTCAAACATTGCCTCTATGTGGTGGGAGGGCATAACAGCAGCTAC  
TGGCTGCCTCCCAGCCTCTCCCTCTAGATGAGTACATCGTTGTTTTAGT  
CGGTCAACAACGAGGTTGATACTGAATGAAGCAGAGCTGATCTTGGCACT  
TGCCCAAGAGTTTCAGATGAGGGTCTGTTACGGTGTCCCTGGAGGAACAAG  
CTTTCCCAGCATTATCCAGGTGATCAGCAGGGCTTCCATGTTAGTTAGT  
ATGCACGGAGCACAACTTGTACCTCTCTTCTTCCCTAGAGGAGCTGC  
TGTGGTGGAGCTCTTCCCTATGCTGTGAACCCAGAACAGTATAACCCAT  
ACAAAACCTTTAGCCTCCCTGCCAGGCATGGAACCTCAATACATTTCTTGG  
AGGAACACTGTTGAGGAGAACACTGTCACACACCCAGACAGACCCCTGGGA  
CCAAGGAGGCATTGCCCACTTGGACAAAGAAGAACAGGAGCGAATCCTTG  
CCAGCAAGGATGTGCCCAGGCACCTGTGCTGCCGTAACCCAGAGTGGCTC  
TTCAGGATCTACCAGGATACTCTAGTGGACATCCCATCCTTCTGATGT  
TCTCAA---GGAGGGCTTGAAA---ACGAGACCAAGCTTGAAGAA---GT  
CCAAACCGGCAAGCACGGTCCACCCTGGCCGTGTCAGGGAACCCAGTGC  
CAGACATCAGTCCAAGCCACCAATGA-GCTAAGCTCACAGTGTCTTGGCA  
ATCCTGTTGATACTCAAGTACCTTAAAGTGCAGAGGTTCAAATATGAGT  
TATGGATCCAGAAGAAAGATACAAGCAAAGGAACCCCTGGAGGATCAAATC  
ATTCAGGCCAACCCTGCGCTGGAGGCTTTTGGCAATGCCAAAACATGAG  
GAATGATAACTCCTCCCGTTTTGGTAAATTTATCAGAATTCACCTTGGAA  
CCAGTGGTAAGTTGTCTCTGCTGACATTGAGACTTACCTACTGGAGAAA  
TCCAGGGTACCTTTCAGCTTAAATCAGAGAGGAACTACCATATTTCTT  
TCAGATCTTGTCCAATCAAAGCCAGAGCTGTTGGACATGCTGTTGATCA  
CCAACAACCCCTACGACTACTCCTACATCTCCCAAGGAGAGGTAACGTGA  
GCATCTATCAATGACTCAGAGGAGCTTATGGCAACTGATAGCGCATTTGA  
TGTTCTTGGCTTCACTCAAGAGGAGAAGCTAGGTGTTTACAAGTTGACAG  
GGGCTATCATGCACTATGGCAACATGAAGTTCAAGCAAAGCAGCGTGAG

GAGCAAGCTGAGCCAGATGGCACAGAGGCTGCTGATAAGTCAGCTTACCT  
AATGGGGCTGAATTCAGCGGACCTCATCAAAGGACTCTGCCATCCCAGGG  
TTAAGGTTGGAAATGAGTATGTAACCAAAGGTCAAGGTGTAGATCAAGTC  
TACTAC-----

-----  
-----  
-----  
-----  
-----  
-----  
-----  
-----  
-----  
-----

-----TATCTTATCTACGCCTCCTTCTCTTTTA  
TGGGATGTTTACAAAATCAGCGACGGGTCAAACATTGTGAACCTGCTGGCC  
AGTAACTCTCCAGCGTCTCGTTTTCGGGTGACGCAACAAAATACTTCAG  
CAACTACAGCCCCGTGATTGGGTTCTACATCTATGAGCCCATCGAGTACT  
GGAACTCTACGGTGCAGGAGCACCTGAAGACACTGAGCCACGGCTTCAAC  
AAGATCTCCTGGATGGACAACCTTCTTCCACTACCTGCGGGTGGTGAACGT  
GAGTGGTTCGACCAARGCCGACTTCGTACCATCCTCAAGGGCTCCTTCC  
TGCGGAGCCCCGGAGTACCAGCACTTCACCGAGGACATCATCTTCTCCAAG  
A---ACCGCGAGAGTG-----ACGAGTACGACATTATCGCCTCGCGCAT  
GTATCTGGTGGCGCGCACCACAGAAAAGAAACGCGAGGAGGTGGTGGAGC  
TCCTCGAGAAGCTGCGGCCGTTGATGCTGATCAACAGCATCAAGTTCATC  
GCCTTCAACCCACGTTTCGTCTTCATGGACCCTACAGCTCCTCGGTCGT  
CTCGCCCATCCTCACCTCCGGCTTTAGCGTGCTCACCATCCTCATCCTGA  
CCTTCTTCCCTGGTTATCAACCCGCTGGGAACTTCTGGCTCATCCTGACG  
GTCACGTCCGTGGAGCTGGGGGTGCTGGGTCTGATGGGCCACACACATT  
CGAGTGGCAGCCGGCCCTGAAGAAGCTGTCCCATCCTGCCATGTGGGCA  
TCATCAATGGGCTCTCTGGCTGGTCTGCGTGGTGGATGAGTCTCCAAC  
GACACCATCACCGCCGGTTCGCTACGACGTGGCCTTGGTGTCCGGCCCT  
GAAAGACCTTGAAGAGGACATAATGAAAGGCCTGAGAGAGCACGGGCTGG  
AAGACAGTAACTGCACCATGGGCTTCAACGTTGTGATCAAGGAGTCTGT  
GATGGCATGGGAGATGTCAGCGAGAAGCACGGCGGAGGGCTGCAATCCC  
AGAGAAGGCAGTTCGTTTCTTCTTCACTGTTCATGTCTGTCTGTCAAGC  
CAGATGGAGAGGAG-----GAGGCA  
GTGGTTATCTTCAGGGAACCAAAGCCAAACTCTGAACTCTCCTGTAAGCC  
ATTATGTCTGATGTTTGTAGACGAGTCTGACCACGAGACGCTAACTGCCG  
TCCTGGAGCCTTTGTTAGCGGAAAGGGATGCGATGAAGCACAGCCGACTA  
ATCCTTTCAGTGGGTGGCCTCCTGCGCTCTTTCTGCTTCCACTTCAGAGG  
CACTGGCTATGACGAGAAGATGGTGCAGAAAATGGAAGGCTTGGAGGCGT  
CAGGCTCCACCTATGCTGCACTCTTTGTGACGCCACCCGGGAAGAGGCC  
TCCCACAACATGGTGTCCACTCCATCACC CGCAGCCACGAGGAGAACCT  
GGAGCGCTACGAGGTGTGGAGGACCAACCCTTCTCTGAGTCTGCTGCCG  
AGCTGCGAGACCGGGTCAAAGGGGTCTCCGCCAAACCCTTCATGGAGACC  
CAGCCCATGATGGATGCGCTGCATTCGACATAGGCAACGCCACAGAGTT  
CTACAAGATCTTCCAGGATGAGATCGGTGAAGTGTTCGGAGCGC---CA  
AC---CCCAGCCGGGAGGAGCGGCGCAGCTGGAGGGCAGCCCTCGATAAG  
CAGCTGAGGAAGAAGCTGAAGCTGAAGCCGGTGTGCGGATGAATGGGAA  
CTACGCCCCGAGGCTGATGACCCAGGAGGCTGTGGAGGTGGTGTGTGAAC



-----  
-----NCAGGCGAAGTCACGGAGAGAGAAGCGGCTTTGGGGA  
TCAACCCGTTTCGCGGACGGCATGGGCGCCTTCAAGATCAACCACAGCTCT  
CATGACATCGGCTCCGG---GCAGACGGCGTTCTCCACCCAGGCG---CC  
CGGCTAC---GCGGCTGCCGCCCTGGGA---CACCACCA-----CCACC  
CGACCCACGTCAGCTCC---TACTCCACGGCGGGGTTCAACTCCACGCGG  
GACTTTCTCTTCAGGAACCGAGGCTTCGGGGACGCGACCAG-----  
---CGCGCAGCACAGTCTGTTTCGCTCCGCCGCCGCGGGGGGTTT---C-  
-----GCGGGGCCACATGGACACTCGGATGCCGCGGGACACCTGCTCTTC  
CCGGGGCTCCACGAG---CAGGCGGCGGGCCACGCGTCATCCAACGTGGT  
GAACAGCCAGATGCGGCTGGGCTTTTCGGGGGACATGTACGGGCGTGCCG  
AGCAGTACGGCCACGTTACCAGCCCGCGGT---CCGACCATTACGCGTCG  
ACCCAGTTGCACGGCTACGGGCCCATGAACATGAACATGGCCGCG---CA  
CCACGGAGCCGGGGCCTTCTTTTCGGTACATGCGGCAGCCCATCAAGCAGG  
AGCTCATTTGCAAGTGGATCGAACC GGAGCAGCTGTCGAATCCCAAGAAG  
TCGTGCAACAAAACCTTTCAGCACCATGCACGAGTTGGTGACCCACTTGAC  
GGTGAGCAGCTGGGCGGTCCGGAGCAGTCGAACCACATCTGCTTCTGGG  
AGGACTGCGCGCGGAGGGAAAGCCGTTCAAAGCAAATACAAACCTGGTG  
AATCACATCCGAGTTCACACCGGGGAGAAGCCGTTCCCCTGCCCGTTCCC  
GGGAT-----

>*Ptychochromis grandidieri*

AGCTTACTAATCCGAGCAGAATAAGCCAACCAGGCTCACTCCTGGGGGA  
CGACCAAATCTATAATGTTATTGTTACCGCACATGCATTTGTAATAATTT  
TCTTTATAGTAATACCAATTATGATCGGAGGCTTTGGGAACTGACTAGTT  
CCATTAATAATTGGTGCCCCGACATGGCCTTTCCTCGTATGAACAACAT  
AAGCTTTTACTTCTTCCCTCCATCATTTCTCCTCCTCCTAGCTTCCCTCAG  
GGGTGGAAGCCGGGGCTGGCACAGGCTGAACTGTTTACCCTCCTCTGGCA  
GGTAATCTCGCACATGCAGGGCCATCCGTCGACTTGACCATCTTTTCTCT  
ACATCTGGCGGGTGTCTCCTCTATCTTAGGGGCCATCAACTTTATTACTA  
CAATTATTAATAATAAANCCCCCGCTATCTCACAATACCAGACCCCTCTCT  
TCGTTTGATCCGTTCTAATTACAGCTGTGCTACTCCTACTCTCCCTCCCA  
GTCCTTGCAGCTGGAATTACTATACTACTAACCAGCCGAAACCTAAATAC  
TACCTTCTTCGACCCTGCAGGAGGAGACCCTATTCTATAACCAGCAC-

-----  
-----  
-----TTCTAGAGCGAAACCTCTACCCATCCAACCTGTCTTGGC  
ATGCTTCTGTTGTGTCAGATGCCCATCAGTGTACCAAGCTGTCAGAGCTTTC  
CTGGGGTATGTGTCTCAGCAACTTCCCTGCTATTTGCAAGACAGAGGACT  
TCCTCCAACCTGCCCAAAGATATGGTGGTCCAGCTTTTGTACACGAAGAG  
CTAGAGACAGAAGATGAGAGACTGGTTTATGAAGCTGCCCTTAACTGGAT  
CAACTATGACCTGGAAAGGAGGCACCTGCCATCTTCCAGAGCTCTTGAGAA  
CGGTCCGCCTCGCACTGCTGCCTGCCATCTTTTAAATGGAGAACGTTTCA  
ACAGAAGAGCTGATTAACCTCTCAGGCCAAGAGCAAGGAGCTGGTGGATGA  
AGCTATTCGCTGTAAGCTCAAGATCCTGCAGAATGATGGCGTTGTTAACA  
GCCCATGTGCTCGACCAAGAAAAACCAGCCATGCCCTCTTTCTTCTGGGT  
GGGCAGACTTTCATGTGTGACAAGTTGTACCTGGTGGACCAGAAGGCCAA  
AGAGATCATAACAAAGGCTGACATCCCCAGTCCCCGGAAGGAGTTCAGCG  
CTTGTGCTATTGGCTGTAAAGTGTACATCACTGGTGGGA--GAGGCTC-A  
GAGAAATGGTGTGTCCAAAGATGTATGGGTCTATGATACTGTCCACGAGGA  
ATGGTCAAAGGCAGCTCCCATGCTCATTGCCAGGTTTGGCCATGGCTCTG  
CAGAGCTGAAACACTGTCTCTACGTCGTAGGAGGTCACACTGCAGCAACC

GGCTGCCTTCCAGCTTCTCCGTCAAGATGAATACATTGTTGTGTTTAGTC  
GTTCAACAACAAGACTGATACTGAATGAAGCAGAGCTAATCATGGCACTG  
GCCCAAGAGTTCAGATGAGAGTGGTCACAGTGTCCTTAGAAGAAGCAGTC  
TTTCCCAGTATTGTCCAGGTGATCAGTGGCGCTTCCATGTTAGTTAGTA  
TGCATGGAGCTCAGCTTATCACCTCGCTCTTCCCTAGAGGTGCTGCT  
GTGGTGGAGCTGTTCCCCTTTGCTGTGAACCCAGAGCAGTACACACCATA  
TAAAACCCTTGCTCCCTTCCAGGCATGGACCTTCACTATGTCTCCTGGA  
GGAACACTAAGGAGGAGAACACTGTTACCCACCCAGACAGGCCCTGGGAA  
CAAGGAGGCATTGCTCACTTGGAAAAAGAGGAGCAGGAGAGAATCCTGGC  
AAGCAAGGATGTTCCAGGCACCTTTGCTGCCGCAACCCAGAGTGGCTCT  
TCAGGATATAACCAGGACACTTTGGTGGAATCCCGTCCTTCTTGGAATC  
CTCAA---AGAAGGCATGAAG---ACAAGCCCAGCTTTAAAAA---AGC  
CAAGGTAGCCAGCATGGTCCATCCGGGCGGGTTCAGAGAACCCAAATGTC  
AAACTTCAGTACAAACCCTAATGAGGCTAAACTCACAGTCTCTTGCCAG  
ATCCCATGGAATCTGAAATTCCTGAAAGTGAGAGAGGTCAAATACGAAGT  
GNNNNNNNNNNAAAAAAGACAGCAGCAAAGGGACTCTGGAGGATCAAATCATCCAGGCGA  
ACCCGGCACTGGAGGCCTTTGGCAACGCCAAAAAGTGAAGAAATGACAAC  
TCATCTCGTTTTTGGAAAAATTTATTCGAATCCATTTTCGGGACGAGCGGCAA  
GCTGTGCTCTGCTGACATCGAAACATACTGCTGGAGAAGTCACGAGTGA  
CCTTTCAGCTGAAGGCCGAAAGGAACTACCATATCTTCTATCAGATCCTG  
TCCAATCAGAAGCCAGAGCTCTTGGACATGCTGCTGATCACCAACAACCC  
GTACGACTACTCTTACATCTCCAAGGAGAGGTAACAGTCACCTCCATCA  
ATGACTCAGAGGAGCTGATGGCCACCGATGGCGCCTTTGATGTGCTTGGC  
TTCACTCCAGAGGAGAAGATGAGTGTCTACAAGCTGACGGGTGCCATCAT  
GCACTATGGCAACATGAAGTTCAAACAGAAGCAGCGGAGGAGCAGGCTG  
AACCTGACGGAACCGAGGCTGCTGATAAATCAGCTTACCTAATGGGGCTG  
AACTCTGCTGATCTCATCAAAGGGCTGTGCCACCCCGAGTCAAGGTAGG  
AAATGAATATGTCACCAAGGGCAGAGTGTGGACCAAGTCTATTATCCCA  
ACAAAGAGGCCCTTCAAGTGCGAGGAGTGTGGGAAGCACTACAACACCAAG  
CTGGGATAACAAGCGCCATGTGGCCATGCACTCCGCCACAGCGGGGATCT  
CACCTGTAAAGTGTGCATGCAGAGCTACGAGAGCACGCCTATTCTCCTGG  
AGCATCTCAAGAGCCACTCCGGGAAGTCCTCGGGCGGTGCCAAGGAGAAA  
AAACACCCGTGCGACCACTGTGACCGCGTTCACACACGGAAGGATGT  
GAGACGACATATGGTGGTCCACACGGGCCGAAAGGACTTCCTATGCCAGT  
ACTGTGCCAGCGCTTTGGCAGGAAAGACCATCTGACACGTCACGTGAAG  
AAGAGCCACTCGCAGGAGCTGCTGAAGATCAAGACGGAGCCTCCGGATAT  
GCTAGGTTCTTTAGCCACTGGGTCTCCACCCTGCTCTGTGAAGGAGGAGC  
TAAGCCCTATGATGTGCAGCATGGGGCCCAACAAAGACCCCATGATGGGC  
AAACCATTCCTAGTGGGGCACCTTTCCGATGGGCATGTACAACCCCCA  
CCAT-----CTACAGGCCATGTGCAATTCTGGGGTGGGTCACCCA----  
--CACCCATCCCTGATGCCAGCTCCTTGTCTGCAGCTATGGGCATGGGC  
TGTCACATGGAANNNNNNNNNNNNNNNNNNNNNNNNNNNNNNNNNNNNNNNN  
NNNNNNNNNNNNNNNNNNNAGTAACTCTCCGAGTGTTCGTACGCTCTGACCCAGCA  
GAAACTTTTGTAACTACAGTCCGGTTCATTTGGGTTTTATATTTATGAAC  
CCATCGACTACTGGAACCTCACGGTGCAGGAGCACCTGAAGACTCTGAGT  
CACGGTTTCAACAAGATCTCCTGGATGGACAACCTTTTCCACTACCTGCG  
GGTAGTGAATGTGAGCGCATCAACTAAGAATGACTTCATCACCATCCTTA  
AGGGTTCCTTCTGCGCAGCCCAGAGTACCAGCACTTCACTGAGGACATC  
ATATTTTCCAAGA---ACCGCGAGACTG-----ATGAATATGGCATTAT  
TGCTCAAGGATGTACTTGGTAGCACGCACCACTGAGAAGAAGCGCGAGG  
AGGTGGTGGAGCTTTTGGAAACCCTTCGTCCCTTGATGCTGATCAACAGC  
ATCAAATTCATTGCCTTCAATCCAACGTTTGTGTTTCATGGACCGGTACAG  
CTCCTCTGTCTCTCCCCATTCTGACCTCAGGCTTCCAGCGTTCACCA



TCCTCATCCTCACTTTCTTCCTGGTCATCAACCCCTTGGGAANNNNNNNNNNNNNNNNNNNNNNNNNNNNNNNNNNNNNNNN  
NNNNNNNNNNNNNNNNNNNNNNNNNNNNNNNGGTTTTCA  
CCAGTTTGAATGGCAACCAGCTTTCAAGAATGTGTCCCCGTCTTGTAAATG  
TTGGCATTATTAATGGGCTTTCTGGATGGTCTTCCACCGTCGATGATGCC  
CCAGCTGACACCATCACTTGGCGCTTTCGCTATGATGTGGCACTGGTGT  
TGCTTTAAAGGATGTGGAGGAGGACATCATGGAGGGGCTGAGAGAGAGTG  
GGATGGAAGACAGTGCCTGCACATCAGGCTTTAGTGTTCATGATCAAGGAA  
TGTTGCGATGGCATGGGTGATGTCAGCGAGAAGCATGGCGGGGGACCGGT  
TGTTCTGAGAAGGCTGTTTCGTTTTTCTTTTACAATTATGTCTGTCTCTG  
TCCTGGCAGAGGATGAGGAG-----  
GAGGAAGTTACCATTTTACCAGGCCAAAGCCAAAATTCAGAACTGTCCTG  
TAAGCCTCTTTGCCTGATGTTTGTGGATGAGTCAGATCACGAGACACTCA  
CAGCTGTCCTGGGGCCTATTGTTGCGGAGCGTAATGCAATGAAAAGAAAGT  
AGGCTTATCCTATCTATAGGTGGCCTGCCTCGCTCTTTTCGCTTCCACTT  
CAGGGGACAGGATATGATGAGAAGATGGTGCCTGAGATGGAGGGGCTGG  
AGGCTTCTGGGTCCACATACATCTGCACCTCTATGTGACTCGAGTCGTGCA  
GAGGCTTCTCAAAACATGGTGTGCCTCCATTACCCGCAATCATGAAGA  
GAACCTAGAACGCTATGAAATATGGAGAACCAACCCCTTTTCTGAGTCCG  
TAGATGAGCTGCGTGACAGAGTCAAAGGAGTGTCTGCAAAGCCCTTCTTG  
GAGACGCAGCCCACGCTAGATGCATTGCACTGTGACATTGGCAATGCTAC  
TGAATTCTACAAAATCTTCCAGGACGAGATCGGAGAAGTGTACAAAAGG  
C---CAAC---CCTAGCCGGGAGGAACGGCGCAGCTGGAGGGCAGCCCTA  
GATAAACAGCTGAGGAAGAAGCTGAAGCTTAAACCGGTAATGAGGATGAA  
TGGGAACCTACGCCCGCAGGCTAATGACCCAGGAGGCTGTGGAGGTGGTGT  
GTGAGCTGGTGCCCTCGGAGGACAGAAGGGAAGCCCTGAGGGAGCTTATG  
AGGCTGTACATCCAGATGAAGCCTGTGTGGCGTGCTACCTGCCAGCCAA  
GGAATGCCCTGACCAGCTATGTCTGCTACAGTTTTAACTCCCAGCGCTTGT  
CTGACCTCCTCTCCACTACCTTCAAATATAGGTACAATGGAAAGATAACC  
AATTATCTGCACAAGACCCTGGCCCATGTACCTGAAATTATAGAGAGAGA  
TGGATCCATAGGAGCCTGGGCCAGTGAGGGGAATGAATCAGCAAACAAT  
CTTATACCATTGAGATGGGTCCCCGTTGGGGCCCCGGTGGAAAGGAGACCCG  
CAGCCTTTCTCCTGCTCCATTGAGGACCCAACCAAACAGACTAAGTTCAA  
GGGCATCAAGACCTACATTTTCATACCAGGCTGACGCCGAGCCACACAGGGC  
ATCCCGTCTACAGACGCTACAAGCACTTTGACTGGCTCTACAACCGCTTG  
CTGCAAAAGTTCACTGTGATCTCTGTGCCTCACCTGCCTGAGAAGCAGGC  
CACGGGACGATTTGAGGAAGACTTCATTGAGAAGCGCAAGAGGCGACTCA  
TACTGTGGATGAACCATATGACCAGTCACCCAGTCTCTCCCAGTATGAA  
GGCTTTGAGCACTTCCTGATGTGTGCTGATGACAAGCAGTGGAACCTGGG  
CAAGAGACGGGCGGAGAAGGACGAGATGGTGGGCGCCATTTTCATGCTGA  
CCCTCAAATCCCCAACGAGCACCAGGACCTTTCAGGACGTCGAGGAGCGG  
GTAGACAACCTCAAGGCCTTTGCTAAAAGATGGACGACAGCGTGATGCA  
GCTGACACACGTTGCCTCGGAGCTTGTGCGGAAACACCTGGGTGGGTTC  
GGAAGGAGTTCCAGCGCCTTGAAAATGCCTTCCAGTCTATCAGCCAGGCA  
TTCATGTTGGACCCCTCCCTACAGGTGAGATGCACTCAACAACGCCGTCTC  
CCATNNNNNNNNNNNNNNNNNNNNNNNNNNNNNNNTGGGTTTTCATCATCGGAGTTGGTGTGGTTGAAAC  
CTCCTGATCTC  
CATCCTGCTGGTCAAAGACAAGAGCCTGCACCGAGCGCCCTACTATTTCC  
TGTTGGACCTGTGCGCCTCTGACATCCTGCGCTCTGCCATCTGCTTCCCC  
TTGCTTTCACCTCGGTCAAAGAATGGATCTGCCTGGACCTACGGCACATT  
GACCTGCAAAGTGATCGCCTTCCCTGGGTGTGCTCTCCTGTTTTACACGG  
CATTCATGCTGTTCTGCGTCAGCGTCACCCGTTACTTGGCCATCGCGCAT  
CACCGTTTTCTACACCAAGAGGCTGACTTTTCTGGACGTGTTTGGCTGTCAT  
CTGCATGGTGTGGACGTTGTCTGTGGCTATGGCCTTCCACCGGTGCTAG

ATGTAGGGACGTACTCGTTTATCCGGGAGGAGGACCAGTGCACATTCAG  
CACCGTTCCTTCAGGGCAAACGATTCGCTGGGCTTCATGCTCCTGCTGGC  
ACTCATCCTCCTGGCCACACAGCTGGTTTACCTCAAGCTCATCTTTTTCG  
TCCACGACCGTCGAAAGATGAAGCCCGTCCAGTTCGTGCCTGCTGTCAGC  
CAGAACTGGACCTTCCACGGCCAGGTGCCAGTGGGAGGCGGCAGCCAA  
CTGGCTGGCTGGATTGGTAGAGGCCACCCCGCTACTTTGCTGGGCA  
TCCGGCAGAACAGCAATGCAGCGGGCCGAGGCGTCTACTGGTACTGGAT  
GAATTCAAACTGAGAAGAGGATTAGTAGGATGTTCTACATCATGACGTT  
TTTCTTCCTGGCACTGTGGGGGCCCTACCTGGTGCCTGCTACTGGCGGG  
TGTTTGCAAGGGGGCCCGTTGTCCCTGGAGGCTACCTGACAGCANNNNNNNNNNNNNNNNNNNNNNNNNNNNNNNNNNNNNN  
NNNNNNNNNNNNNNNNNNNNNNNNNNNNNNNNNNNNNNNNNNNNNNNNNNNNNNNNNNNNNNNNNNNNNNNNNNNNNNNNNN  
NNNNNNNNNNNNNNNNNN--N--NNNCGT

CCCCTCGGCAACAGCTTGCTATCCCCGCAGCAAACCGATGAGCCCAGTG  
TTGCCACCCCGGCAGCGATGGTTTGTCAACC---CTGCCAAACAACCGA  
CTGGACTTTGCTGCCCTCGGCATAACGACGCCGCT-----GATTTTGC  
CGGTAACGCGGCCACCTTACTGTCTACGCAGCGGCCGGAGTGAAGGCTC  
-----TTCCCCTGCCGACTGCAGGCTGCTCCAACCGGCCTCTTGGCTAT  
TACGCAGACCCGTCTG---GCTGG---GGAGGACGCACGCCGCCAGTA  
TTGTGGTGTAATAAGTAAATCCAGCTCGGTCTTTCTCCTGCTGGCCCCACTA  
ACTCCATCGGTGGCAGAACAGGCA---CC---AGCTACCTGT-----  
-CCGAGGA---GGGA---GACTC---CATCACGACAGAAAGGTCACCC--  
-AT---TGGTGGCTCGGAGGAG---ACCAAACAAAAGACATGAC---AT  
CTGA---ATCGAGCTGGATAGAA---ACGCCGTCTCCATTAAATCTATC  
GATTCGAGCGATTCTGGTATCTTTG---AGCAGGCAAAGCGGAAAAGAAT  
CTCACCTTCTGCAACACCG-----

GTTTCAGAGACAGTGTCCTCCNNNNNNNNNNNNNNNNNNNNNNNNNNNAC  
AGGCGAAGTCACAGAGAGAGAAGTGGCGTTGGGGATAAATCCGTTTCGCGG  
ATGGGATGGGCGCCTTCAAATAAACCACAGCTCCCACGATATTGGCTCC  
GG---ACAGACGGCGTTCCTCCTCCAGGCG---CCCGGCTAC---GCAGC  
AGCTGCCCTTGGGA---CACCATCA-----CCACCGACCCACGTTGGCT  
CT---TACTCCACGGCGGCTTTCAACTCCACCAGGACTTTCTCTTCAGA  
AATCGGGGTTTTGGGATGCCACCGG-----GGCGCAGCACAG  
TCTGTTCGCCTC-----CGGAAGTTT---C-----GCAGGGCCAC  
ATGGACACTCAGATGCAGCGGGCACCTGCTCTTCCCAGGGCTCCATGAG  
---CAAGCAGCAAGCCATGCCTCTCCAACGTGGTCAACAGCCAGATGCG  
GCTGGGCTTCTCGGGGACATGTACGGACGGGCCGACAGTATGGCCACG  
TTACAAGCCCACGGT---CTGACCACTATGCTTCAACCCAGCTGCACGGC  
TATGGCCCCATGAACATGAATATGGCCGCA---CACCACGGAGCAGGGGC  
CTTCTTTTCGATACATGAGGCAGCCGATCAAACAAGAGCTTATCTGCAAGT  
GGATCGAACCGGAGCAGCTGACAAAATCCAAAAAGTCGTGCAACAAACT  
TTTAGCACGATGCACGAGCTTGTGACCCATCTAACGGTGGAGCATGTGGG  
GGGACCAGAGCAGACCAACCATTTGCTTCTGGGAGGACTGCNNNNNNNNNNNNNNNNNNNNNNNNNNNNNNNNNNNNNN  
NNNNNNNNNNNNNNNNNNNNNNNNNNNNNNNNNNNNNNNNNNNNNNNNNNNNNNNNNNNNNNNNNNNNNNNNNNNNNNNNNN  
NNNNNNNN

>Rachycentron canadum

AGTCTCCTCATTTCGAGCAGAATTAAGCCAACCTGGCTCCCTACTGGGAGA  
CGACCAAACCTACAACGTAATCGTAACAGCCCACGCCTTCGTAATAATCT  
TCTTTATAGTAATACCAATTATGATCGGAGGCTTTGGGAACTGACTTATT  
CCTCTAATGCTAGGCGCCCCGATATGGCTTTTCCCCGTATAAATAATAT  
AAGTTTCTGACTACTTCCCCATCATTCCTCCTGCTGCTAGCCTCTTCAG  
GTGTTGAAGCTGGAGCAGGGACTGGTTGGACAGTTACCCACCTCTGGCG  
GGCAACCTAGCACATGCAGGAGCCTCTGTTGACTTAACTATTTTCTCCCT  
TCATCTTGCAGGGGTGTCTTCAATTCTCGGGGCTATTAATTTTATTACAA

CAATTATTAACATAAAAACCACCAACTGTGACTATGTACCAAATTCCTC  
TTCGTATGGGCTGTCTAATCACTGCCGTCCTTCTCCTCCTCACTCCC  
AGTCCTGGCTGCTGGCATTACTATACTGCTTACAGACCGAAATTTAAATA  
CAGCCTTCTTTGACCCTGCAGGAGGGGTGACCCAATTCTATATCAACAC  
TTATTC-----  
-----  
-----  
-----  
-----TTCTAGAGAGAAAACCTTCACCCCTCTAACTGCCCTGG  
CATGCTGTTGCTGTCTGACGCCACCAGTGCACCAAGCTGTCAGAGCTCT  
CTTGGGGCATGTGCCCTCAGCAACTTCCCTGCTATTTGCAAGACAGAGGAC  
TTCTTCAACTGCCCAAAGATATGGTGGTCCAGCTTTTATCACATGAGGA  
GCTAGAGACAGAAGATGAGAGACTGGTTTATGAAGCTGCCCTTAACTGGA  
TCAACTATGACCTGGAGAGGAGGCACTGCCATCTTCCAGAGCTTCTGAGA  
ACGGTCCGCCTGGCCCTGCTGCCTGCCATCTTTTTGATGGAGAATGTCTC  
AACAGAGGAGCTGATCAATGCCAGGCCAAGAGCAAGGAACTGGTGGATG  
AAGCTATTTCGCTGTAAGCTGAAAAATCCTGCAGAATGACGGCGTTGTTAAC  
AGCCCATGTGCTCGACCAAGAAAAACCAGCCATGCCCTTGTCTTCTGGG  
GGGGCAGACTTTCATGTGTGACAAGTTGTATCTGGTAGACCAGAAGGCCA  
AAGAGATCATACCCAAGGCTGACATCCCCAGCCCCAGGAAGGAGTTCAGT  
GCCTGCGCCATCGGCTGTAAGGTGTACATCACTGGTGGGA--GAGGCTC-  
AGAGAATGGTGTGTCCAAAGATGTATGGGTCTACGATACTGTCCACGAGG  
AATGGTCCAAAGCAGCTCCCATGCTCATCGCTCGGTTTGGCCATGGCTCT  
GCAGAGCTGAAACATTGCCTCTACGTAGTTGGAGGGCACACAGCAGCCAC  
CGGCTGCCTCCCGCTTCTNNNNNNGGACAATTACATTGTTGTGTTTCAGTCGCTCA  
ACAACAAGACTGATACTGAATGAAGCGGAGCTCATCATGGCGCTGGCCCA  
GGAGTTCAGATGAGAGTGGTCACAGTATCCCTGGAGGAACAGTCGTTCC  
CCAGTATCGTCCAGGTGATCAGTGGCGCTTCTATGCTAGTCAGCATGCAC  
GGAGCCCAGCTCATCACCTCGCTCTTCCCTCCCCAGAGGTGCTGCTGTGGT  
GGAAGTGTTCCTTTGCTGTGAACCCAGAGCAGTACACCCCTTATAAAA  
CCCTGGCCTCCCTTCCCGCATGGACCTTCACTACATCTCCTGGAGAAAC  
ACCAAGGAGGAAAAACCATCACTCACCCAGACAGACCCTGGGAACAAGG  
AGGCATTGTTCACTTGGACAAGGAGGAGCAGGAGCGAATACTGGCCAGTA  
AGGATGTTCCCAGGCACCTGTGCTGCCGCAACCCAGAGTGGCTCTTCCGG  
ATCTACCAGGACACATTGGTGGACATCCCTTCCCTCCTGGAAGTCTCAA  
---AGAGGGCATGAAG---ACCAAGCCCAGCTTTAAGAA---GTCAAAGC  
CAGCCAGCACGGTCCACCCAGGCCGAGTTAGAGAGCCTCAATGTCAGACC  
TCAGTCCAAACCAGTAATGAGGCTAAACTCACAGTCTCCTGGCAGATCCC  
ATGGAATTTGAAATACCTGAAGGTAAGAGAGGTGAAGTACGAGGTGTGGA  
TCCAGAAAAAAGATGCCAACAAGGGGACACTGGAGGATCAAATCATCCAG  
GCAAACCTGCACTGGAGGCCTTTGGCAATGCCAAAACATTGAGAAATGA  
CAACTCGTCTCGTTTTGGAAAATTCATTCTGAATTCACCTTGGCACAAGCG  
GCAAACGTGCATCTGCTGATATCGAGACGTACCTGCTGGAGAAATCACGT  
GTCACATTTTCAGCTCAAGGCAGAGAGGAACTACCACATCTTCTACCAGAT  
CCTGTCCAATCAGAAACCAGAACTGCTGGACATGCTGCTGATCACCAACA  
ACCCGTATGACTACTCCTACATCTCCCAAGGAGAGGTGACGGTTGCCTCT  
ATCAATGACTTGGAGGAGCTAATGGCCACTGACAGTGCCTTCGATGTGCT  
CGGCTTCACTGCAGAGGAGAAGATGGCCGTCTATAAACTGACTGGCGCCA  
TCATGCACTATGGCAACATGAAGTTCAAACAGAAGCAGCGTGAGGAGCAG  
GGCGAACCTGATGGGACTGAGGCCGCTGATAAATCAGCTTACCTAATGGG  
GCTGAACTCCGCTGACCTCATCAAAGGCCTTTGCCACCCAAGAGTCAAGG  
TAGGAAACGAATATGTAACCAAAGGCCAAAGTGTGGACCAAGTCTACTAT  
CCCAACAAGGAGGCCTTCAAGTGTGAGGAGTGTGGGAAACACTACAACAC

CAAGCTGGGATATAAGCGTCATGTGGCCATGCATTCTGCCACATCAGGGG  
 ATCTCACCTGTAAAGTGTGCATGCAGAGCTACGAGAGTACACCTGTCCTC  
 CTGGAGCACCTCAAGAGCCACTCCGGTAAATCTTCGGGTGGCACCAAGGA  
 GAAAAAGCACCCGTGCGACCACTGTGACCGTCGCTTCTACACACGGAAGG  
 ATGTGCGACGACACATGGTGGTCCACACAGGCCGGAAGGACTTCCTGTGC  
 CAGTACTGTGCCAGCGCTTCGGCAGGAAAGACCATCTGACACGCCACGT  
 GAAGAAGAGCCACTCACAGGAACTGCTGAAGATCAAGGCGGAGCCTCCAG  
 ATATGTTAGGTCTCTTAGCCTCTGGATCACCACCTTGCTCTGTGAAAGAG  
 GAACTCAGCCCCATGATGTGTGGCATGGGTCCCAACAAAGACCCCATGAT  
 GGGCAAAGCGTTCGCCAGTGGGGCCCCTTTTCCAATGGGCATGTACAACC  
 CCCACCAT-----CTCCAGGCAATGTCTAATACTGGGGTGGGTCACCCA  
 -----CACCCATCCCTAATGCCAGTTCCTTGTCTGCAGCTATGGGCAT  
 GGGCTGTACATGGAATATCTCATCTACGCCTCTTTCTCATTTCATGGGAT  
 GTTTACAAATTAGTGATGGGTCAAATATCGTCAACCTGCTGGCAAGTAAC  
 TCTCCGAGTGTTCATATGCTCTGACCCAGCAGAAATACTTCAGTAACTA  
 CAGCCCTGTGATCGGGTTTTACATTTACGAGCCCATCGAGTACTGGAAC  
 CCACGGTGCAGGAGCACCTGAAGACCCCTGAGTCATGGCTTCAACAAGATC  
 TCCTGGATGGACAACTTTTTCCACTACCTACGGGTGGTCAACGTGAGTGC  
 GTCAACTAAGAGCGACTTCATCACCATCCTCAAAGCTCCTTCCCTGCGCA  
 GCCCAGAGTACCAGCATTTCACAGAGGACATCATATTTCTCCAAGA---AC  
 CGTGAGACTG-----ACGAGTACGACATCATTGCCTCACGGATGTACCT  
 GGTGGCGCGGACGACTGAGAAGAAGCGTGAGGAAGTGGTGAGCTTCTGG  
 AAAAGCTTCGTCCGTGATGCTCATCAACAGCATCAAGTTCATTGCCTTC  
 AATCCACATTTGTGTTTATGACCCTACAGCTCCTCCGTTCATCTCGCC  
 CATCCTGACCTCAGGCTTCAGCGTACTCACTATCCTCATCCTCACTTTCT  
 TCCTGGTCATCAACCGTTGGGAAACTTCTGGCTCATCCTCACGGTCACA  
 TCTGTGGAGCTGGGCGTCTTGGGTTTGATGNNNNNNNNNNNNNNNNNNNNNNNNNN  
 NGTCTACATCTTGCAATGTTG  
 GCATTATTAATGGGCTCTCTGGATGGGCTTCCTCGGTGGATGACTCCCA  
 GCTGACACCATCACTCGAAGGTTTCGCTATGATGTGGCACTGGTGTGAGC  
 ATTAAGGATCTGGAGGAGGACATCATGGAGGGCTGAGAGAGAGTGGGT  
 TGGAAAGACAGTGCTTGCACCTCAGGCTTTACTGTCATGATCAAGGAATGT  
 TGTGATGGCATGGGCGATGTCAGCGAGAAGCATGGTGAGGACCAGTTAT  
 TCCTGAGAAGGCTGTACGTTTCTCTTTCACTGTTATGTCTATCTCTGTCC  
 TGGCAGACGATGAGGGG-----AGG  
 GAGGTACCATCTTCACCGAACAAGGCCAACTCAGAAGCTGCCTGTAA  
 GCCCTTTGCTTGTGATGTTTGTGGATGAGTCAGACCACGAGACTCACAG  
 CTCTCTGGGGCCTGTAGTTGCAGAGCGTAATGCAATGAAAGAGAGCAGG  
 CTCATCCTAGCCATAGGTGGCCTGCCTCGCTCCTTCCGCTTCCTCAG  
 AGGTACGGGATACGATGAGAAGATGGTGCGAGAGATGGAAGGCTGGAGT  
 CCTCAGGTCCCTCATATGTCTGCACTCTATGCGACTCCAGTCCGGCAGAG  
 GCCTCTCAAACATGGTGTACACTCCATCACCCTGATGCCATGAAGAAA  
 CCTAGATCGTTACGAAATATGGAGAACCAACCCCTTCTCTGAGTCTGCAG  
 ATGAACTGCGAGACAGAGTCAAAGGGTCTCTGCAAACCTTTCATGGAG  
 ACCCAGCCCACACTGGACGCATTACACTGTGACATGGCAATGCCACTGA  
 GTTCTACAAAATCTTCCAGGATGAGATTGGAGAAGTGTATCAAAGGT--  
 -CAAC---CCCAGCCGGAAGAAAGGCGCAGCTGGAGGGCAGCTCTAGAT  
 AAACAGCTGAGGAAGAAGATGAAGCTTAAACCGGTAATGAGGATGAATGG  
 GAACTACGCCCGCAGGCTAATGACCCCTGGAGGGTGGTGGTGTGTG  
 AACTGGTGCCTCAGAGGAGAGGAGGAGGCCCCCTGAGGGAGCTTATGAGG  
 CTCTACCTCCAGATGAGGCCTGTGTGGCGCGCCACCTGCCAGCAAAGGA  
 ATGCCCTGACCAGCTGTGCCGTTACAGCTTTAACTCCAGCACTTTGCCG  
 ACCTCCTCTCTCCACTTCAAATATAGGTACAATGGAAAGATAACCAAT

TACCTTCACAAGACTCTGGCCCATGTGCCTGAAATCATAGAGAGAGATGG  
ATCCATAGGAGCCTGGGCCAGCGAAGGGAATGAGTCAGCAAACAAATCAT  
ACACCATCGAGATGGGTCCCCTGGGACCCCGGTGGAAGGAGAACCCACAG  
CCTTCTGTTGCTCCATTGAAGACCCACAAAACAGACAAAGTTCAAGGG  
CATCAAGACCTATATTTCTTACCGGGTCACACCGAGCCACACGGGGCGTC  
CTGTCTACAGGCGTTACAAACACTTTGACTGGCTGTACAACCGCCTACTG  
CACAAGTTCACTGTGATCTCTGTGCCCTCACCTGCCCTGAGAAACAGGCTAC  
GGGGCGATTTGAGGAAGACTTCATTGAGAAGCGTAAAAGACGACTGATAC  
TATGGATGAACCACATGACCAGTCACCCAGTCTCTCCAGTACGAAGGC  
TTTGAGCACTTTCTGATGTGTGCTGATGACAAGCAGTGGAACCTGGGAAA  
GAGACGGGCGGAGAAGGACGAGATGGTTGGCGCCCATTTTCATGCTGACAC  
TCCAAATCCCCAACGAGCACCAGGACCTTCAGGACGTAGAGGAGCGGGTC  
GACTCCTTCAAATCCTTTGCTAAAAAAATGGACGACAGCGTGATGCAGCT  
CACGCATGTTGCCCTCAGAGCTGGTGCGAAAACATCTGGGTGGTTTCAGGA  
AGGAGTTCAGCGGCTGGGAAATGCCCTCCAGTCTATCAGCCAGGCATTC  
ATGCTGGACCCTCCCCACAGCTCAGATGCCCTCAACAACGCCATTTTACA  
TNTCTCTCGCACGTTCCCTCAAACCTGACCTCTCTGGGTTTCATCATTGGAGT  
CGGTGTGGTTGGAAACCTCCTGATCTCCATCCTGCTGGTCAAAGACAAGA  
GCCTGCACCGAGCGCCCTACTATTTCCCTGCTGGACCTGTGCGCCTCTGAT  
ATCCTGCGCTCCGCCATCTGCTTCCCCTTTGTCTTCACCTCAGTCAAGAA  
TGCTCTGCGTGGACCTACGGCATGCTGACCTGCAAAGTGATTGCCTTCC  
TGGGTGTGCTCTCCTGTTTTCCACACAGCGTTCATGCTGTTCTGTGTCAGT  
GTCACTCGCTACCTGGCCATCGCACATCACCGTTTCTACACCAAGAGGCT  
GACCTTCTGGACCTGTCTGGCTGTCATCTGCATGGTGTGGACGTTGTCAG  
TAGCTATGGCGTTCCACCAGGCTAGATGTAGGGACGTA CTCTTTTATC  
CGGGAGGAGGACCAGTGCACATTCCAGCACCGTTCCTTCCGGGCGAATGA  
TTCGTTGGGCTTCATGCTCCTCCTGGCGCTCATCCTCCTGGCCACACAGC  
TGGTTTACCTCAAGCTCATCTTTTTTGTCCATGACCGTMGAAAGATGAAG  
CCTGTTCAAGTTCGTACCTGCTGTCAGCCAGA ACTGGACCTTCCATGGGCC  
AGGTGCCAGTGGGCAGGCGGCGGCCAACTGGCTGGCTGGATTTGGTCGTG  
GCCCCACCCACCTACTTTGCTGGGTATCCGGCAGAACAGCAATGCAGCG  
GGCCGAGGCGTCTACTGGTATTGGATGAATTCAAACAGAGAAGAGGAT  
TAGTAGGATGTTCTACATCATGACGTTTTTTCTTCTTCCAGGACTGTGGGGC  
CCTATCTGGTGCCTGCTACTGGCGGGTGTGCAAGGGCCCCGTAGTC  
CCTGGGGGCTATCTGACGGCAGCCGTGTGGATGAGCTTTGCCAGGCTGG  
GGTCAATCCTTTTCATCTGCATCTTCTCCAACAGGAGGCCAAATCTCGCT  
TTCACCCTGGCGTGGGGACTGGTCTGGCACGGAGC---GCAGCGTCCCA  
CTCGGCAACAGCTTGCTATCCCCGCAGCAAACCGAGGAGCCCACTGTTGC  
CACCCCCCGCAGCGATGGTTTGTCAACC---CTGCCAACAAACCGACTGG  
ACTTTGCTGCCTCGGCATACGACGCCGCT-----GATTTGCGCCGGT  
AACCGGCCACCTTGCTGTCTACGCAGCGGCCGGAGTGAAGGCTC----  
--TTCCCCTGCCGACTGCAGGCTGCTCCAACCGGCCTCTTGGCTATTACG  
CAGACCCGTCGG---GCTGG---GGAGGACGCACGCCCGCCGAGTACTGT  
GGCGTAAACAGCAAATCCAGCTCGGTCTTTTCTGCTGGCCCCGCAACTC  
AATCGGTGGCAGAGCGGGCA---CC---AACTACCTGG-----CCG  
AGGA---GGGA---GACTC---CATCCCTACAGAGAGATCCCCG---AT-  
--CGGAGGCTCGGAGGAG---ACCAAACCCAAAGACATGAC---GTCTGA  
---GTCGAGCTGGATAGAG---ACGCCGTCTCCATTAAGTCCATTGATT  
CGAGCGATTCTGGGATCTTTG---AACAGGCCAAAAGAAGGAGAATCTCA  
CCGTCTGCCACGCCG-----GTTTCAGAGACAGTGTCCCCGTAAA  
ATCTGAGCATCACTCAACAGGCGAAGTCACAGAGAGAGAAGTGGCGTTGG  
GGATAAATCCGTTTCGCGGATGGGATGGGCGCCTTCAAATAAACCACAGC  
TCCCACGATATTGGCTCCGG---ACAGACGGCGTTTCTCCTCCAGGCA--

-CCCGGCTAC---GCAGCGGCCGCCCTGGGA---CACCATCA-----CC  
ACCCGACCCACGTTGGTTCT---TACTCCACGGCGGCTTTCAACTCCACC  
AGGGACTTTCTCTTCAGAAATCGGGGTTTCGGGGACGCCACCGG-----  
-----GGCGCAGCACAGTTTGTTCGCCTC-----TGGAAGTTT--  
-C-----GCAGGGCCACATGGACACTCAGATGCAGCGGGCCACCTGCTC  
TTCCAGGGCTCCACGAG---CAAGCGGCGAGCCATGCCTCTTCCAACGT  
GGTCAACAGCCAGATGCGGCTGGGCTTCTCGGGGACATGTACGGACGGG  
CCGACCAGTACGGCCACGTTACAAGCCCACGGT---CCGATCACTATGCT  
TCGACCCAGCTGCACGGCTATGGCCCCATGAACATGAATATGGCCGCG--  
-CACCACGGAGCAGGGGCCTTCTTTCGCTACATGAGGCAGCCGATCAAAC  
AAGAGCTCATCTGCAAGTGGATCGAGCCGAGCAGCTGACAAATCCCAA  
AAGTCGTGCAACAAAACTTTTAGCACGATGCACGAGCTTGTGACCCATCT  
GACGGTGGAGCATGTGGGGGACCGGAGCAGACCAACCACGTCTGTTTCT  
GGGAGGACTGCTCCAGAGAAGGAAAGCCATTCAAAGCCAAATACAAACTT  
GTAAATCATATCAGAGTACACACCCGGAGAAAAGCCCTTTCCGTGTCGGT  
CCCCGGCTGTGGCAA

>*Ranzania laevis*

AGTCTACTCATCCGAGCAGAATAAGCCAACCCGGGGCTCTCCTTGGAGA  
CGACCAAATCTACAATGTCATCGTCACAGCACATGCCTTTGTAAATGATTT  
TCTTTATAGTAATACCAATTATGATCGGAGGATTCGGCAACTGACTGATC  
CCCCAATGATCGGGGCCCCAGATATGGCCTTCCCTCGAATGAACAACAT  
GAGCTTTTACTCCTACCCCCCTCATTCCTTCTTCTTCTTGCCTCATCAG  
GCGTTGAAGCTGGAGCCGGGACAGGATGAACTGTCTACCCTCCTTTAGCC  
GGAAATTTAGCCCATGCAGGCGCTTCCGTTGACTTAACCATCTTTTCCCT  
CCACCTGGCTGGTATTTTCATCAATTCCTGGGGCTATTAATTTTATTACAA  
CAATTATTAATATGAAACCCCTGCAATCTCGCAATACCAAACCCCTCTA  
TTTGTCTGAGCAGTTCTCATTACAGCTGTTCTTCTTCTCCTATCCCTCCC  
AGTTCTTGCAGCAGGATTACAATGCTCCTCACCGACCGAAATCTAAACA  
CCACTTTCTTCGACCCGGCTGGAGGAGGAGACCCAATTCTATAACCAACAC  
CTC-----  
-----  
-----

-----NNNNNNNNNNNNNNCCTTACCCATCTAACTGCCTTGGCATGCTGCTGCTAT  
CCGACGCCACCAGTGCACCAAGCTGTCAGAGCTCTCCTGGGGCATGTGC  
CTCAGCAACTTCCCCGCCATTTGTAAGACAGAGGACTTCCTCCAAC TGCC  
CAAAGATATGGTGGTGCAGCTTTTGTCCCATGAGGAGCTAGAGACTGAAG  
ATGAGAGACTGGTGTATGAAGCTGCCCTCAATTGGATCAACTATGACCTA  
GAAAAGAGGCACTGCCACCTTCCAGAGCTCCTGAGAACAGTCCGCC TGGC  
CCTTCTGCCCCGCATCTTCTCATGGAAAACGTCTCTACAGAAGAGCTGA  
TCAACGCCAGGCCAAGAGCAAAGAGCTTGTGGATGAGGCTATCCGCTGC  
AAGCTGAAGATCCTGCAGAATGATGGTGTGGTGAACAGCCCATGTGCACG  
TCCCAGAAAAACCAGCCATGCCCTCTTTCTTCTTGGCGGGCAAAC TTTCA  
TGTGTGACAAGTTGTACCTGGTGGACCAGAAAGCCAAAGAGATCATCCCC  
AAGGCTGACATCCCCAGCCCCAGGAAGGAGTTCAGCGCCTGCGCCATTGG  
CTGCAAGGTGTACATCACAGGTGGGA--GAGGCTC-AGAGAATGGTGTGT  
CCAAAGACGTGTGGGTGTACGACACAGTCCACGAGGAATGGTCAAAGGCA  
GCGCCCATGCTTATCGCCCCGTTTGGTACGGCTCTGCTGAGCTGAAACA  
CTGCCTCTACGTGGTFCGGAGGCCACACTGCGGCAACCGNNNNNNNNNNNNNNNNNNNNNGGACA  
ACTA  
CA  
TTGTTGTGTTTAGTCGTTCCACAACAAGACTGATACTGAATGAAGCAGAG  
CTAATTATGGCGCTGGCCCAGGAGTTCAGATGAGAGTGGTACAGTATC  
CCTGGAAGAACATTCCTTCCCCAGTATTGTACAGAGTGATAAGCAGTGCTA

CTATGTTAATCAGTATGCATGGAGCTCAGCTTATTACCTCATTGTTCCCTC  
CCTCGAGGAGCTGTTGTGGTTGAGCTATTCCCCTTTGCTGTGAACCCAGA  
GCAATATACTCCATATAAAACCCTTGCCTTCCTCCAGGCATGGACCTAC  
ACTATATCTCATGGAGGAACAATAAAGAAGAGAACCACCATCACCCACCCA  
CAGAGACCCTGGGAACAAGGGGGCATCATACTTGGAGAAGGAGGAACA  
AAGGCGAATACTTACTAGCAAAGATGTTCCCAGACACCTGTGCTGCCGCA  
ACCCAGAGTGGCTATTCGGGATCTACCAGGACACTTTGGTGGATATTCCT  
TCCTTCCTGGACATCCTCAA---AGAAGGCTTAAAG---ACAAAGCCTAG  
TTTGAAGAA---GTTAAAACCAGCAAGCGCACTTCACCCTGGCCGGGTCA  
GAGAACCCTCACTGTCAAACATCAGTACAAACCAGTAATGAGGCTAGACTC  
ACAGTCTCCTGGCAGATACCTTGGAACTCTCAAGTACCTGAAGGTCAGAGA  
AGTCAANNNNNNNNNNNNNNNNNNNNNAAGAAGGACACCAGCAAGGGGACGCTGGAGGACC  
AAATCATCCA  
GGCCAAATCCGGCGCTGGAAGCCTTCGGGAACGCCAAAACCCTGAGGAACG  
ACAACCTCGTCTCGTTTTGGAAAATTCATCCGAATTCACTTCGGTACGAGC  
GGAAAGCTGTGCTCCGCCGACATCGAGACGTACCTGCTGGAGAAGTCGCG  
CGTCACCTTTCAGCTCAAGGCTGAAAGAAATTACCACATCTTCTACCAGA  
TTCTGTCCAACCACAAGCCGGAGCTCCTGGACATGTTGCTGATCACCAAC  
AACCCGTACGACTACTCCTACATCTCCCAGGGAGAAGTTACCGTGGCCTC  
CATCAACGACTCCGAGGAGCTGATGGCCACCGACAGCGCCTTCGACGTGC  
TGGGCTTCACCCGCCGAGGAGAAGATGGGCGTCTACAAGCTGACGGGCGCT  
ATCATGCACTACGGCAACATGAAGTTCAAACAGAAGCAGCGAGAGGAACA  
AGCCGAGCCGATGGGACGGAGTCGGCGGATAAAAACCGCTTATCTGATGG  
GGCTGAACTCAGCCGACCTCATCAAAGGGCTGTGCCACCCGAGGGTCAAG  
GTAGGAAACGAGTACGTGACCAAAGGTCAAAGTGTGGACCAAGTNNNNNNNNNNNNNNNNNNNNNTTCA  
AG  
TGTGAGGAGTGTGGGAAGCACTACAACACCAAGCTGGGATATAAGCGGCA  
TGTGGCCATGCACTCTGCAACCGCAGGCGATCTAACGTGTAAAGTGTGCA  
TGCAGACCTACGAGAGCACACCGGTGCTCTTGGAGCACCTAAAGAGCCAC  
TCCGGGAAGTCTCAGGTGGCACCAAGGAGAAAAAACACCCCTGTGACCA  
TTGTGATCGTCTGCTTCTACACACGGAAGGACGTGAGACGGCACATGGTGG  
TCCACACAGGCCGAAAGGACTTCTGTGTGCTGACTGTGCCCAACGCTTT  
GGCAGGAAGGACCATTTGACCGGGCATGTGAAGAAGAGCCACTCACAGGA  
GCTTCTGAAAATTAAGACGGAGCCTCCTGACATGTTAGGCCTTTTAGCTT  
CTGGGTACACACCTGTCTGTGAAGGAGGAGCTCAGCCCCATGATGTGT  
GGCATGGGTCCCAACAAGGACCCCATGATGGGGAACCTTTCCCAGTGG  
AGCCCCATTTTCAATGGGCATGTATAACCCCAACCAT-----CTCCAGG  
CCATGTCTAATCCTGGGGTGAAGTACCCA-----CATCCTTCCCTGATG  
CCCAGTTCCTTGTCTGCAGCTATGGGCATNNNNNNNNNNNNNNNNNNNNNNNNNNNNNNNNNNNN  
NNNNNNNNNNNNNNNNNTCAGTGATGGATCAAATATCG  
TGAACCTATTGGCCAGTAACTCTCCGAGTGTTTCATATGCTTTGACCCAG  
CAAAAATACTTCAGCAACTACAGTCCGTGATCGGGTTTTACATTTACGA  
GCCCATCGAGTATTGGAACCTAACGGTGCAGGAGCACCTGAAGACTCTGA  
GTAATGGCTTCAATAAGATCTCCTGGATGGACAACTTTTTCCACTACCTG  
AGAGTAGTGAACGTGAGTGCCTCAACCAAGAATGACTTCATTACCATCCT  
TAAAGGCTCCTTCCGTGCGCAGCCCGAGTACCAGCACTTCACTGAGGACA  
TCATCTTCTCTAAGA---ATCGTGAGACCG-----ATGAATACGACATC  
ATCGCTTCCAGGATGACTTGGTGGCACGTATCACAGAAAAGAAGCGCGA  
AGAGGTCGTGGAGCTTCTGGAAAAGCTCCGTCCATTAATGTTGATCAACA  
GCATCAAGTTCATTGCCTTCAATCCTACTTTTGTGTTTCATGGACCGCTAC  
AGTTCCTCCGTCACTCACCCATCCTGACCTCAGGATTCAGCGTGCCTCAC  
AATCCTCATCCTCACTTTTTTCTTGGTCATCAACCCCTTGNNNNNNNNNNNNNNNNNNNNNNNNNN  
NNNNNNNNNNNNNNNNNNNNNNNNNNNNNNNNNTTTCACCAGT  
TTGAGTGGCAGCCAGCTCTCAAAAATGTGTCTGCATCTTGCGATGTTGGA

ATCATCAACGGGCTCTCTGGGTGGACTTCCTCAGTGGATGATGCCCCGGC  
TGACACCATCACTCGTCGATTTTCGCTACGACGTTGCGCTAGTGTGGCCT  
TAAAAGATCTGGAAGAGGACATCATGGAGGGCCTGAGAGAGAATGGGATG  
GAGGACAGCACTTGTGCTTCAGGCTTCAGTRTCATGATCAAAGAATCCTG  
TGATGGCATGGGTGATGTCAGCGAGAAGCACGGCGGTGGACCCGCTGTT  
CTGAGAAGGCAGTGCCTTCTCTTTCACCATCATGTCCGTTTCCGTGCGG  
GCAGAAGGCAAGGAC-----GATGA  
AGTAACCATCTACAGGGAGCCAAAACCAAACCTCAGAGATGTCCTGTAAGC  
CCCTTTCCTGATGTTTGTGGATGAATCCGACCACGAGACGCTCACAGCC  
ATCCTGTGGCCATAATTGCAGAGCGTAATGCAATGAAAGAGAGCCGACT  
CATCGTATCCATTGGTGGACTGTCTCGCTCCTTCCGCTTTCACTTCCGAG  
GCACAGGCTATGATGAGAAGATGGTGCCTGAGATGGAGGGCCTCGAGGCC  
TCTGGATCCACCTACATCTGCACACTTTCGCGATTCCAGTCGCGCMGAGGC  
CTCTCAAAACATGGTCCCTACACTCCATCACACGCAGTCACGAAGAGAACT  
TAGAGCGCTACGAAAATATGGAGAACCAACCCTTTTCTGAGTCTGTAGAG  
GTTCTTAGAGACAGAGTCAAAGGGTCTCTGCCAAGCCTTCTTGGAAAC  
CCATCCAACAATGGATGCACTCCACTGCGACATAGGCAACGCCACTGAGT  
TTTACAAAATTTTCCAGGACGAGATTGGGGAAAGTCTACAAAAGGT---G  
AAC---CCCAGCCGGGAGGAGCGGCGCAGCTGGAGAGCAGCCCTTGACAA  
ACAGCTGAGAAAAAAGATGAAGCTCAGACCCGTGATGAGGATGAATGGGA  
ACTACGCCCGCGGTTAATGACCCAGGAAGCCGTGGAGGTAGTGTGTGAG  
CTGGTGCCCTCAGAGGAGAGGAGGGAGGCCCTGAGGGAGCTGATGAAGCT  
GTACCTCCAGATGAAGCCTGTGTGGCGTGCCACACACCCAGCCAAGGAGT  
GTCCTGACCAGCTCTGCCGCTACAGCTACAACCTCTCAGCGTTTTGCCGAC  
ATCCTTCTTCCACCTTCAAGTACAGATATAATGGAAAGATAACCAATTA  
CCTGCACAAGACCCTGGCCCATGTGCCTGAAATCATTGAGAGGGATGGAT  
CCATAGGGGCTGGGCCAGNNNNNNNNNNNNNNNNNNNNNNNNNNNTCTTACACCATCGAGATGGGTTCCTT  
GGGGC  
CCAGATGGAAGGAGAGTCCAGAGCCTTTCCTCCTGCTCCATCGAAGACCC  
ACCAAACAGACAAAGTTTAAGGGCATCAAGACGTACATTTTCGTACCGGGT  
GACGCCGAGCCACACGGGCCACCCGTCTACAGGCGTTACAAACACTTTG  
ACTGGCTGTACAACCGTTGCTGCACAAGTTCACTGTGATCTCCGTGCC  
CACCTGCCCCGAGAAGCAGGCCACAGGGCGATTTGAGGAGGACTTCATCGA  
GAAGCGCAAGAGGCGACTGATACTTTGGATGAACCACATGACCAGTCACC  
CGGTCTCTCCAGTACGAAGGCTTCGAGCACTTCTGATGTGTGCCGAC  
GACAAGCAGTGGAAGCTGGGCAAGAGGCGCGGAGAAAGATGAGATGGT  
GGGCGCGCATTTTCATGCTGACCCTTCAGATTCCTCAACGAGCACCAAGACC  
TTCAGGACGTAGAGGAGCGGATCGACTCCTTCAAGTCCTTTGCCAAGAAA  
ATGGACGACAGCGTGATGCAGCTCACGCACGTGCGCTCTGAGCTGGTGCG  
AAAGCACCTGGGTGGTTTCAGGAAGGAGTTCAGCGGCTGGGAAACGCCT  
TCCAGTCCATCAGCCAGGCGTTCATGCTGGACCCCTCCCCACAGCTCAGAG  
GCCTTGAACAGCGCCATCTCNNNN-----



-----  
 -----  
 -----  
 -----  
 -----  
 -----  
 -----  
 -----  
 -----  
 -----  
 -----  
 -----  
 -----  
 -----  
 -----  
 -----  
 -----  
 -----  
 -----

-----CATCACTCAACAGGCGAAGTCAC  
 AGAGAGAGAAGTGGCGTTGGGGATAAATCCGTTTCGCAGATGGGATGGGCG  
 CCTTCAAATAAACCACAGCTCCCACGACATTGGCTCTGG---ACAGACT  
 GCGTTTTTCCTCTCAGGCG---CCCGGCTACGCAGCAGCAGCAGCCCTTGG  
 A---CACCATCA-----CCACCCGACCCACGTTGGCTCT---TACTCCA  
 CGGCGGCTTTCAACTCCACCAGGGACTTTCTCTTCAGAAATCGGGGATTTC  
 GGGGACGCCACGAG-----TGCCCAGCACAGTTTGTTTCGCCTC  
 -----CGGAAGTTT---C-----GCAGGGCCACATGGACACTCCG  
 ATGCAGCGGGACACCTGCTCTTCCCCGGGCTCCACGAG---CAGGCGGCG  
 AGCCACGCGTCTTCCAATGTGGTCAACAGCCAGATGCGGCTGGGCTTCTC  
 GGGGACATGTACGGACGGGCGGAGCAGTACGGCCACGTTACGAGCCCC  
 GGT---CTGACCACTACGCGTCGACCCAGCTGCACGGCTACGGCCCCATG  
 AACATGAACATGGCAGCG---CACCAAGGAGCGGGGCCTTCTTCCGATA  
 CATGCGGCAGCCGATCAAGCAAGAGCTCATCTGCAAGTGGATCGAGCCGG  
 AGCAGCTGACGAACCCCAAAAAGTCGTGCAACAAAACCTTTCAGCACGATG  
 CACGAGCTGGTACTCATCTGACGGTGGAGCACGTAGGGGGACCAGGAGCA  
 GACCAACCATGTGTGCTTCTGGGANNNNNNNNNNNNNNNNNNNNNNNNNNNNNNNNNNNN  
 NNNNNNNNNNNNNNNNNNNNNNNNNNNNNNNNNNNNNNNNNNNNNNNNNNNNNNNNNNN  
 >Rathbunella hypoplecta

AGCCTTCTTATCCGAGCAGAGCTAAGCCAACCCGGCGCCCTCTTGGGGGA  
 CGATCAAATTTATAACGTAATTGTTACGGCACACGCCTTCGTAATAATTT  
 TCTTTATAGTAATAACCAATTATAATCGGCGGGTTTGAAACTGACTTATT  
 CCGTTAATGATCGGTGCCCTGACATAGCATTTCTCGAATAAATAACAT  
 GAGCTTTTGACTTCTCCCTCCTTCTTCCTCCTCCTTTTAGCTTCTTCGG  
 GAGTAGAGGCAGGGGCGGAACAGGTTGAACAGTCTACCCCCCTCTTTCT  
 GGCAATTTAGCCCATGCAGGAGCCTCTGTTGATTTAACAAATTTTCTCTCT  
 TCACTTAGCCGGAATTTCTTCAATTTCTTGGAGCAATTAACCTTCAACAA  
 CTATTATTAACATGAAACCTCCTGCTATCTCTCAATACCAACACCCCTA  
 TTTGTCTGATCAGTCTTATCACTGCAGTACTTCTTCTCCTCCTCCTTCC  
 TGTAATTGCAGCTGGTATCAATACTCCTCACAGATCGAAATCTTAATA  
 CTACCTTCTTCGATCCTGCTGGAGGAGGAGATCCTATTCTTTATCAACAT

TTA-----

-----TTCTCGAGAGAAACCTTCACCCGTCTAATTGCCTCGG  
CATGCTCTTGCTGTCCGATGCCACCAGTGCACCAAGCTGTCAGAGCTCT  
CCTGGGGCATGTGCCCTCAGCAATTTCCCCGCCATTTGCAAGACGGAAGAC  
TTCTCCAACCTGCCCAAAGATATGGTGGTGCAGCTTTTGTACACGAGGA  
GCTAGAGACCGAAGACGAGAACTGGTTTACGAAGCTGCCCTTAACTGGA  
TCAACTACGACCTGGAAAAGAGGCAC TGCCACCTTCCAGAGCTCCTGAGG  
ACTGTCCGCCTGGCCCTGTTGCCCGCAATCTTTCTCATGGAGAACGTTTC  
GACGGAAGAGCTGATCAATTTCCAGCCCAAGAGCAAGGAGCTGGTGGATG  
AAGCTATCCGATGTAAGCTGAAGATCCTGCAGAACGATGGCGTCGTC AAC  
AGCCCGTGCGCCCGACCAAGAAAAGACCAGCCACGCCCTATTTCTTCTGGG  
AGGGCAGACTTTCATGTGTGACAAGTTGTACCTTGTGGACCAGAAAAGCCA  
AAGAGATCATCCCCAAGGCTGACATTTCCAGCCCCAGGAAGGAGTTCAGT  
GCCTGCGCCATCGGCTGCAAGGTGTACATCACTGGCGGGA--GAGGCTC-  
AGAGAACGGCGTGTCCAAAGATGTGTGGGTCTACGACACCGTCCACGAGG  
AGTGGTGAAGGCGGCACCCATGCTCATCGCCAGGTTTCGGCCACGGCTCT  
GCAGAGCTGAAACACTGCCTCTACGTGGTAGGAGGTCACACGGCAGCAAC  
CGGCTGCCTGCCAGCTTCTCNNNNNGGATGATTACGTGGTTCGTTTCAGTCGCTC  
GACAACGAGGCTGATACTGAATGAGGTGGAGCTAATCATGGCGCTGGCCC  
AGGAGTTCAGATGCGAGTGGTACGGTGTCACTAGAGGAACAGTCTTTC  
CCAAGTATCGTCCAGGTGATCAGCGGCGCTTCCGTGTTGGTCAGTATGCA  
TGGCGCTCAGCTCATCACCTCACTTTCCTCCCCAGAGGAGCTGTTGTGG  
TGGAGCTGTTCCCTTTGCTGTGAACCCAGAGCAGTACACCCCTATAAAA  
ACCCTCGCCACCCCTCCAGGCATGGATCTTCACTATATCTCCTGGAGGAA  
CACTAATGAGGAGAACACCATCACCCATCCAGACAGGCCCTGGGAGCAAG  
GGGCATCGTTCACTTGGAGAAGGAGGAGCAGGAGCGTATACTGGCGAGC  
AGAGACGTCCCCAGGCACCTGTGCTGCCGCAACCCAGAGTGGCTCTTCCG  
GATCTACCAGGACACTTTGGTGGACATCCCTTCCCTTCCGGAAGCCCTTA  
A---AGAGGGCATGAAG---ACAAAGCCCAGCGTGAAGAG---GTCAAAG  
CCGGCCAGCACAGTCCACCCRGGCCGGGTCAGACAACCACAGTGTCCAGAC  
CTCGGTACAAACCACCAACGAGGCTAAACTCACAGTCTCCTGGCAGATCC  
CGTGGAATCTGAAATACTTGAAGGTGAGAGAGGTGAAGTACNNNNNN-----  
AAGAGGGACGCCAGCAAGGGGACGCTGGAGGACCAGATCATCCAGGCCAA  
CCCGGCGCTGGAGGCCTTCGGCAACGCCAAAACGCTGAGGAACGACAAC  
CGTCTCGCTTCGGGAAGTTCATCCGAATCCACTTTGGCACGAGCGGGAAG  
CTGTCTCGGCCGACGTTGGAGACATACCTGCTGGAGAAGTCCCGGTGCAC  
CTTTCAGCTGAAGGCGGAGAGGAACTACCACATCTTCTACCAGATCCTGT  
CCAATCAGAAGCCGGAGCTGCTGGACATGCTGCTGATCACCAACAACCCC  
TACGACTACTCCTACATCTCCCAGGGCGAGGTGACGGTCGCCTCCATCAA  
TGACTCGGAGGAGCTGCTGGCCACCGACAGCGCCTTCGACGTGCTGGGCT  
TCACGCCGGAGGAGAAGGTGGGCGTCTACAAGCTCACCGGCCCATCATG  
CACTACGGCAACATGAAGTTCAAGCAGAAGCAGCGCGAGGAGCAGGCCGA  
GCCCCAGGGGACGGAGGCCGCTGACAAGACCGCGTACCTGATGGGGCTGA  
ACTCCGCCGACGTCAATCAAGGGGCTGTGCCACCCCAGAGTCAAGGTGGGG  
AACGAATTTGTACCAAGGGACAAAAGCGTGGACCAAGTCTACTANCCCAAC  
AAGGAGGCCTTCAAGTGTGAGGAGTGCGGGAAGCACTACAACACCAAGCT  
GGGATATAAGCGCCATGTGGCCATGCACTCTGCCACGTGAGGGGATCTCA  
CCTGCAAAGTGTGCATGCAGAGCTATGAGAGCACACCCGTGCTCTTGGAG  
CACCTCAAGACCCACTCGGGGAAGTCTTCGGGCGGCACCAAGGAGAAAA  
GCACCCGTGCGACCACTGTGACCGTCGCTTCTACACGCGCAAGGATGTGA



CATTTCTTACCGGGTCACGCCGAGCCACACGGGGCGTCCCGTCTACAGGC  
GCTACAAACACTTCGACTGGCTGTACAACCGCTTACTGCACAAGTTCCTACT  
GTGATCTCCGTGCCTCACCTGCCCAGAGAAGCAGGCCACGGGGCGATTTGA  
GGAGGACTTCATCGAGAAGCGCAAGAGGCGGCTGATACTGTGGATGAACC  
ACATGACCAGCCACCCGGTCTCTCCAGTACGAGGGCTTCGAGCACTTT  
CTGATGTGCGCCGACGACAAGCAGTGGAAAGCTGGGCAAGAGGCGGGCGGA  
GAAGGATGAGATGGTGGGCGCCACTTCATGCTGACCCTGCAGATCCCCA  
ACGAGCACCAGGACCTTCAGGATGTGGAGGAGCGCATCGACACCTTCAAG  
GCCTTCGCCAAGAAAATGGACGACAGCGTGATGCAGCTCACGCACGTCGC  
CTCAGAGCTGGTGCGCAAGCACCTGGGCGGGTTCAGGAAGGAGTTCAGC  
GGCTGGGAAATTCTTTCCAGTCCATCAGCCAGGCGTTCATGCTGGACCCT  
CCCCACAGCTCGGAGGCCCTCAACAANNNNNNNNNNNNNNN-----

-----GCCAAATCTCGCTTTACCCCTGGCGTGGGGACTGGTC  
CTGGCACGGAGC---GCAGCGTCCCCTCGGCAACAGCTTGCTGTCCCG  
CAGCAAACCGACGAACCCACTGTTGCCACCCCCCGCAGCGATGGTTTGT  
CACCC---CTGCCAACAACCGACTGGACTTTGCTGCCTCGGCATACGACG  
CCGCT-----GATTTGCGCGGTAACGCGGCCACCTTGCTGTCTAC  
GCAGCGGCCGGAGTGAAGGCTC-----TTCCCTGCCGACTGCAGGGTG  
CTCCAACCGGCTCTTGCTATTACGCAGACCCGTCGG---GCTGG---G  
GAGGACGCTCACCGCCGAGTACTGCGGCGTAAACAGCAAATCCAGCTCG  
GTCTTTTCTCTGCTGGCCCGCTAACTCTATCGGTGGCAGAGCGGGCA---C  
C---AACTACCTGG-----CCGAGGA---GGGA---GACTC---CA  
TCACGACGGAGAGGTCGCCG---AT---CGGCGGCTCGGACGAG---ACC  
AAACCCAAAGACATGAC---ATCCGA---GTCGAGCTGGATAGAG---AC  
GCCGTCCCTCCATTAAGTCAATTGATTCGAGCGATTCTGGAATCTTTG---  
AACAGGCCAAGAGGAGAAGAATCTCACCTTCTGCCACGCCG-----  
GTTTCAGAGACAGTGTCTCCGTTAAANNNNNNNNCACTCAACAGGCCGAAGTCACA  
GAGAGAGAAGTAGCGTTGGGGATCAATCCGTTTCGCGGATGGGATGGGCGC  
CTTCAAATAAACCACAGCTCCACGATATCGGCTCCGG---ACAAACGG  
CGTTTTCTCTCCAGGCG---CCCGGTAC---GCGGCAGCCGCCCTGGGA  
---CACCATCA-----CCACCCGACCCACGTTGGCTCT---TACTCCAC  
GGCGGCTTTCAACTCCACCGGGACTTTCTCTTCAGAAATCGGGGTTTCG  
GGGACGCCACCGG-----GGCGCAGCACAGTTTGTTTCGCCTC-  
-----CGGAAGTTT---C-----GCAGGGCCACATGGACACTCGGA



CCAGCAAGGAAGTCCCCAGACATCTGTGCTGCCGCAACCCTGAATGGCTC  
TTCCGAATCTACCAGGATACATTGGTGGATATCCCATCATTTCTGGAGGC  
TCTTAA---AGAGGGCCTAAAG---ACCAGACCCAGCTTGAAGAA---GT  
CTAAACCTGCCACCGCAGTTACCCGGGCGGGTCAGAGAACCCAGTGC  
CAAACCTCAGTTCAAGCCACCAATGAGGCAAAACTCACTGTCTCGTGGCA  
GATCCCCTTGAATCTGAAATATCTGAAGGTGAGAGAAGTGAAGTATGAGG  
TTTGGATCCAGAAGAGGGGACACTAGCAAGGGGACCCTGGAGGATCAGATC  
ATCCAAGCCAACCCTGCGCTGGAGGCCTTCGGGAATGCCAAAACCCTGAG  
GAATGACAACCTCCTCTCGTTTCGGGAAATTCATCCGCATACATTTTCGGGA  
CGAGTGGGAAGCTCTCCTCTGCGGACATTGAGACCTATCTGCTGGAAAAG  
TCCCGAGTACCTTTCAGCTCAAGTCGGAGAGGAACTACCACATCTTCTT  
CCAGATCTTGTCCAATCAAAGCCAGAGCTGCTGGACATGCTGCTGATCA  
CAAACAACCCGTACGACTACTCCTTCATCTCCCAGGGAGAAGTGACGGTG  
GCCTCCATCAACGACTCRGAGGAGCTGATGGCCACCGACAGTGCCTTTGA  
CGTGCTCGGCTTCACGCAGGAGGAGAAGATGGGCGTCTACAAGCTGACCG  
GGGCCATTATGCACTACGGCAACATGAAGTTCAAAACAGAAGCAGCGTGAG  
GAGCAGGCGGAGTCTGACGGGACCGAGGCAGCTGACAAGTCCGCCTACTT  
GATGGGCTTGAACCTGCTGACCTCATCAAAGGACTCTGCCATCCCAGGG  
TCAAAGTAGGGAATGAGTACGTCACCAAAGGCCAGGGCGTAGACCAAGTC  
TACTACCCAAACAAGGAGGCCTTCAAGTGTGAGGAGTGTGGCAAGCACTA  
CAACACCAAGCTGGGATACAAGCGCCATGTGGCCATGCACTCGGCCACGG  
CAGGGGACCTGACGTGCAAAGTGTGCATGCAGAGCTATGAGAGCACGCCG  
GTTCTCCTGGAGCACCTCAAGAGCCACTCGGGCAAGTCCCTCGAGCGGAAC  
CAAGGAGAAGAAGCACCCATGTGATCACTGCGACCGCCGCTTCTACACCC  
GCAAGGATGTGAGGCGACACATGGTGGTCCACACAGGCCGAAAGGACTTC  
TTGTGCCAGTACTGCGCTCAGCGCTTCGGCAGGAAAGACCACCTCACACG  
CCACGTAAAGAAGAGTCACTCACAGGAGCTGCTGAAGATCAAGACGGAGC  
CTCCCGACATGCTGGGCCTCCTCAGCTCCGGCTCGCCTCCCTGCTCTGTG  
AAGGAGGAGCTTAGCCCCATGATGTGCAGCATGGCTCCCAACAAAGATCC  
CATGATGGGCAAACCCCTTCCCAGTGGGACCCCGTTCCCATGGGCATGT  
ATAACCACCACCAC-----CTCCAGGCCATGTCCAATTCTGGGGTGGGC  
CATCCC-----CACCCCTCCCTGATGCCCAACACCCTGTCTGCAGCCAT  
GGGCATGGGCTGCCACATGGAATATCTCATCTACGCCTCCTTCTCCTTCA  
TGGGATGTTTACAGATCAGTGGATCCAACATTTGTGAACCTGCTGGCC  
AGTAACTCCCCCAGCGTCTCGTACGCGCTCACTCAGCAGAAGTACTTCAG  
CAACTACAGTCCCGTGATTGGTTTTCTACATCTACGAGCCCATCGAGTACT  
GGAACTCCACAGTGCAGGAGCACCTGAAGACGCTGAGCCACGGCTTCAAC  
AAGATATCTTGGATGGACAACCTTCTTCCACTACCTGCGGGTGGTGAATGT  
GAGTGCGTCGACCAAAACCGACTTCATCAACATCCTCAAGAGCTCCTTCC  
TGCGCAGCCCTGAGTACCAGCACTCACTGAGGACATCATCTTCTCCAAG  
A---ACCGTGAGAGTG-----ATGAATATGACATCATCGCCTCGCGCAT  
GTACCTGGTGGCCCGCACCACGGAGAAGAAGCGGAGGAGGTGGTGGAGC  
TTCTGGAGAAGCTGCGTCCGCTGATGCTAATAAACAGCATCAAGTTCATT  
GCCTTCAACCCACCTTTGTGTTTCATGGACCGGTACAGCTCCTCTGTGAT  
ATCCCCATCTTAACTCAGGCTTCAGCGTGCTCACCATCCTCATCCTCA  
CTTTCTTCCCTGGTCATCAACCCCTGGGGAACCTTCTGGCTCATCCTTACA  
GTCACCTCTGTGGAGCTGGGCGTGCTGGGTCTGATG-----  
-----  
-----  
-----  
-----  
-----  
-----

-----TCGTACG  
CCATTGAGATGAGTCCCAAGGGCCCCCTGTGGAAGGACAGCCCTCAGCCC  
TTTTTCCTGCTCCATCGAGGACCCCACCAAGCAGACCAAGTTCAAGGGCAT  
CAAGACGTACATATCGTACCGCGTCACTCCCAGCCACACGGGGCGCCCCG  
TCTACAGACGCTACAAACACTTCGACTGGCTGTACAACCGCCTGCTGCAC  
AAGTTCAGTGTTCATCTCCGTGCCCCACCTGCCGGAGAAACAGGCCACGGG  
GCGCTTCGAGGAGGACTTCATCGAGAAGCGAAAGCGGCGGCTGATCCTGT  
GGATGAACCACATGACCAGCCACCCAGTTCTCTCCCAGTACGAGGGCTTC  
GAGCACTTCCTRATGTGCGCTGACGACAAGCAGTGGAAGCTGGGCAAGCG  
GCGGGCAGAGAAGGACGAGATGGTGGGCGCACACTTCATGCTCACCTTCC  
AGATCCCCAACGAACACCAGGACCTGCAGGACGTGGAGGAGCGGGTCGAC  
TCCTTCAAGTCCTTCGCCAAGAAAATGGATGACAGCGTGCTGCAGCTCAC  
GCATGTGGCCTCAGAGCTGGTTCGAAAGCACCTGGGGGGGTTCCGGAAGG  
AGTTCAGCGGCTGGGGAACGCCTTCCAGTCCATCAGCCAGGCCTTCATG  
CTGGACCTCCCCACAGCTCGGAAAACCTCAACAACGCCATCTCCCCTC  
CCTTGCCACGTTCCCTCAAACCTGACCTCTCTGGGATTCATCATTGGAGTTG  
GCGTGGTTGGAAAACCTCCTGATCTCCATCCTGCTGGTCAAAGACAAGAGC  
TTGCACCGTGCACCCTACTACTTCCCTGCTGGACCTGTGTGCCTCTGACAT  
CCTGCGCTCAGCCATCTGTTTCCCCCTTGTCTTACCTCCGTCAAGAATG  
GATCCACCTGGACCTATGGCACCCCTTACGTGCAAAGTGATTGCCTTCCTG  
GGCGTGCTCTCCTGCTTCCACACGGCGTTCATGCTGTTCTGTGTGTCAGCGT  
CACTCGCTACCTGGCCATCGCGCATCACCGCTTCTACACAAAGAGGCTCA  
CCTTCTGGACTTGTCTGGCCGTTCATCTGCATGGTGTGGACGTTGTGCGTA  
GCCATGGCCTTCCCCCAGTGCTGGACGTGGGGACGTACTACTTCATCCG  
GGAGGAGGACCAGTGCACGTTCCAGCACCGCTCCTTCAGGGCTAACGACT  
CGCTGGGCTTCATGCTCCTGCTGGCACTCATCTCCTCGCCACACAGCTG  
GTTTACCTCAAGCTCATCTTCTTGTTCATGACCGTCGGAAGATGAAACC  
TGTCAGTTTGTGCCAGCTGTGAGCCAGAACTGGACCTTCCACGGACCAG  
GTGCCAGCGGGCAGGCAGCGGCAAACTGGTGGCCGGATTTGGGAGAGGC  
CCCACCCACCGACCTTGCTGGGCATCCGGCAGAAATAGCAACGCGGGCGGG  
CCGCAGACGTCTGCTGGTGTGGACGAGTTCAAAAACAGAGAAGAGGATTA  
GTAGGATGTTCTACATCATGACCTTTTCTTTCTCGTCTATGGGGGCC







-----  
-----  
-----  
-----TACCTGATCTACGCCTCCTTCTCCTTCA  
TGGGATGTTTACAAATCAGTGACGGATCCAACGTGGTCAACCTGTTAGCC  
AGCAACTCCCCAGCGTGTCTACGCAGTGAAGTACTTTCAG  
TAACTACAGCCCGGTGATTGGGTTCTACATATACGAGCCCATCGAGTACT  
GGAACTCCACAGTGCAGGAGCACCTCAAACGCTGGGCCACGGTTTCAAC  
AAGATCTCTTGATGGACAATACTTCCACTACCTAAAGGTGGTGAACGT  
GAGCGCTCGACCAAGAGTGAAGTTCATCAGCATCCTCAAAGGCTCCTTCC  
TGCGGAGCCCGGAGTACCAGCATTTACGAGGACATCATCTTCTCCAAG  
A--ACGGCG-----AGGAGTATGACATCATCGCGTCCAGGAT  
GTACCTGGTGGCACGAACCACCGAGAAAACACGGGAGGAAGTGGTGGAGC  
TGTTGGAGAGGCTCCGCCCTCTCGCTCATCAACAGCATCAAGTTCATC  
GTCTTTAACCCACCTTTGTTTTTCATGGACCGCTACAGCTCCTCAGTCAT  
CTCGCCATCCTCACCTCGGGCTTCAGCGTCTCACCATCCTCGTCTCA  
CCTTCTTCTGGTTCATCAACCCCTGGGGAACCTTCTGGTTGATCCTGACA  
GTCACCTCAGTGGAGCTGGGAGTCTGGGCCTCATGGGTTTTCAACAGTT  
TGAGTGGCAGCCGGCCCTTAAGAACGTGTCCCAGCATGTCAGGTGGGCA  
TCATCGATGGCTTGTGAGGTTGGGCAGCTTCCGTAGATGACATGCCATTG  
GACACCATCTCACGGAGGTTCCGCTATGATGTGGCGCTGGCGTCTGCTCT  
GAAGGACCTGGAGGAGACATCATTGAGGGGATGAGGGAGCATGGCCTGG  
ACGACAGCACCTGCACCTCCGGCTTCACTGTGATGATCAAGGAGTCATGT  
GACGGCATGGGAGACGTGAGCGAGAAGCATGGTGGGGGACCAGCCATACC  
TGAGAAGGCTGTCCGTTTCTCATTACAGTCATGTCTGTCTCCATCCAGG  
CTGAAGGGCAGGAG-----GAAACT  
CTCACCATATTCAGGGAGCCAAAACCCAACTCTGAGCTGTCTGCAAACC  
CCTCTGTTTTGATGTTTGTGGATGAGTCTGACCACGAGACTCTGACGGCCA  
TCCTGGGGCCTGTGGTGGCTGAGAGGAATGCCATGAAAAATAGTCGCCTC  
ATCCTGTCCCTGGGTGGTCTTCCCTCGGTTCTTCCGCTTCCATTTAGGGG  
CACAGGCTACGATGAGAAGATGGTACGTGAGATGGAGGGCATGGAGGCCT  
CGGGCTCCACTTATGTCTGCACACTGTGTGACTCCACCAGAGCTGAGGCC  
TCCAAGAACATGGTGTCTCCACTCCATCACACGATGCCATGATGAGAACCT  
GGACCGTTATGAGACCTGGAGAACCAACCCCTACTCTGAGTCTGCAGAGG  
AGCTGAGAGACCGGGTCAAAGGTGTCTCTGCCAAGCCCTTCATGGAGACC  
CAGCCCCTCTGGACGCTCTGCACTGCGACATCGGGAACGCTACAGAGTT  
TTACAAGATCTTCCAGGATGAGATCGGGGAGGTGCACTGCAAACC---CG  
AT---CCCAGCAAGGAGGAGCGGCGGAGCTGGAGGGCAGCTCTGGATAAG  
CTATTGAGGAAGAAAATGAAGCTTAAGCCTGTGATGAGGATGAACGGGAA  
CTATGGCCGGCGGCTGATGACCATGGAGGCGGTGGAGGTGGTGTGTGAGC  
TGGTGCCATCAGAGGAGCGGAGGGAGGCCCTCCGGGAGCTGATGGGTCTC  
TACCTCCAGATGAAGCCAGTCTGGCGATCCACATGCCAGCCAAAAGAGTG  
CCCTGACCAGCTTTGCCGTTACAGCTACAACCTCCAGCGCTTTGCAGATA  
TTCTCTTCTACCTTCAAGTATAGGTATGACGGTAAGATCACCATTAC  
CTGCACAAGACTCTAGTCTACGTTCCGGAGATCGTGGAGAGGGACGGTTC  
CATCGGAGCCTGGGCCAGCGAG-----



ATCATGGAGCAGGGGCCTTCTTCCGTTACATGAGGCAGCCGATAAAACAA  
GAGTTAATCTGCAAAATGGATCGAACCGGAGCAACTAACGAATCCGAAAAA  
GTCGTGCAACAAAACTTTTAGCACAATGCACGAGCTAGTGACCCATTTGC  
CGGTGGAGCATGTGGGA-----  
-----  
-----

>Rheocles wrightae

AGTCTGCTTATTCGAGCAGAACTAAGCCAGCCAGGCTCCCTCCTAGGAGA  
TGACCAAATTTATAACGTCATCGTCACGGCACATGCCTTCGTAATAATTT  
TCTTTATAGTAATACCCGTTATGATTGGAGGCTTCGGAAACTGACTTGTC  
CCTCTCATAATTGGAGCCCCTGACATAGCATTTCCCCGAATAAAACAACAT  
AAGTTTTTGGACTCCTCCCCCCTTCATTTCTCCTTCTCCTCTCATCTTCTG  
GAGTCGAAGCAGGAGCTGGAACAGGATGAACCGTCTATCCCCCTTGGCC  
GGAAATTTAGCCCACGCAGGTGCATCAGTTGATCTAACCATCTTTTCCCT  
TCATTTAGCAGGAATTTCCCTCAATTCAGGGGCTATTAATTTTATCACAA  
CTATTATCAACATAAAAACCCCTGCGATTTTACAATACCAAACCCCTTA  
TTCGTCTGAGCAGTCTAATCACCGCTGTCCTCCTTCTCCTTTCCCTTCC  
TGTTTTAGCTGCAGGAATCACCATGCTTTTAAACAGACCGAAACCTAAACA  
CCACTTTCTTTGATCCTGCAGGAGGAGGAGACCCCATTTCTTTACCAACAT  
CTCTTC-----  
-----  
-----

-----NNNNNNNNNNNAACCTTCAACCGTCCAACGTCTAGGCATGCTGTTGCT

GTCTGATGCCACCAGTGCACCAAGCTGTGAGAGCTCTCCTGGGGCATGT  
GTCTAAGCAACTTCCCTGCTATTTGCAAGACAGAGGACTTCCCTCCAACCTA  
CCCAAAGACATGGTAGTGCAGCTTTTGTACACAGGAGTTTGGAGACAGA  
AGATGAGAGACTGGTTTTATGAAGCTGCCCTTAACTGGATCAACTACGACC  
TGAAAGGAGGACTGTCTATCTCCAGAGCTCTTGAGAACAGTCCGCCTT  
GCCCTGCTGCCTGCCATCTTTTTAATGGAGAACGTCTCTACAGAAGAGTT  
GATCAATGCCCAGGCAAAGAGCAAGGAAGTGGTAGATGAAGCTATCCGCT  
GTAAGCTGAAGATCCTGCAGAAATGATGGCGTTGTCAACAGCCCTTGTGCT  
AGACCAAGAAAACTAGCCATGCCCTTTTTCTTCTGGGTGGGCAGACTTT  
TATGTGTGATAAGTTGTACTTGGTGGACCAGAAGGCCAAAGAGATCATCC  
CGAAAGCTGACATCCCAGCCCCAGGAAGGAGTTTCAAGTGCCTGCGCCATT  
GGCTGTAAGGTGTACATCACTGGTGGGA--GAGGATC-TGAAAATGGTGT  
GTCCAAAGATGTATGGGTCTACGACACTGTCCACGAAGAATGGTCAAAGG  
CGGCGCCCATGCTCATCGCCAGGTTTGGTCTATGGCTCTGCAGAGCTCAA  
CACTGCCTTTACGTGCTAGGAGGACACACTGCAGCAACTGGCTGCCCTCC  
AGCNNNNNNNNNNNAGACGAGTACATTTGTCGTGTTTCAAGTCAACGACGAGGCTGATAC  
TAAATGAAGCTGAATTGATCATGGCGCTGGCCCAGGAATTCAGTTGAGG  
GTGGTCACAGTATCCCTGGAGGAGCAGTCTTTTCCAGTATCATCCAGGT  
GATCAGCGGGGCGTCCATGTTGGTCAAGTATGCATGGAGCTCAGCTCATCA  
CCTCGCTGTTCCCTCCCAGAGGTGCTGCCATCGTAGAGCTCTTCCCCTTT  
GCTGTGAACCCAGAGCAATACACCCCATATAAAAACCTCGCCTCCCTTCC  
TGGCATGGACCTTCACTACGTCTCCTGGAAAACTCTAAGGAAGAAAACA  
CCATCACCCATCCAGAAAGACCCCTGGGAACAAGGAGGTATTGCCCACTTG  
GAAAAAGCTGAACAGGAGCGAATCCTGGTGAAGTAAAGGACGTCCCCCGGCA  
TCTTTGCTGCCGAAGCCCAGAGTGGCTTTTCCGGATCTACCAGGACACAC  
TGGTAGACATCCCATCTTTCCCTGGATGTCCTCAA--GGATGGCATGAAG  
---ACCACGTATAACTTGAAGAA---GGCTAAGGCAGCCAGCACCGTCCA  
CCCTGGCAGGGTCAAGAAAGCCAGTGTGACACCTCCATACAAACCTCTA

AGGAGGCCAAACTCACAGTCTCCTGGCAGATCCCCTGGAATCTGAAATAC  
CTGAAGGTGAGAGAGGTGAAGTATGAGGTGTGGATCCAGAAAAGGGACAG  
CAGCAAGGGAACGCTGGAGGATCAAATCATCCAGGCCAACCCAGCACTCG  
AGGCCTTTGGTAACGCCAAAACCTTTGAGAAAACGACAACTCATCTCGTTTT  
GGGAAATTTATCCGAATTCATTTTGGCACGAGCGGAAAACCTTTCGTCTGC  
TGACATCGAGACGTACCTGTGGAGAAGTCACGCGTCACCTTTCAGCTCA  
AGGCTGAGAGAAAACCTACCACATCTTCTACCAGATCCTGTCTAATCATAAA  
CCAGAGCTGCTGGACCTGCTACTGATTACCAATAACCCCTATGACTACTC  
TTACATCTCCCAAGGAGAGGTAACAGTTGCCTCCATCAATGACTCCGAGG  
AGCTCATGGCCACMGACAGYGCCTTTGATGTGCTCGGCTTACTCCAGAT  
GAGAAGATGGGCGTTTACAAACTGACTGGTGCCATCATGCACTATGGCAA  
CATGAAGTTCAAACAGAAGCAGCGTGAGGAGCAGGCCGAACCTGATGGGA  
CCGAGGCTGCCGATAAATCAGCTTACCTAATGGGGTTGAACTCTGCAGAC  
CTTATCAAAGGGCTGTGCCATCCCAGAGTCAAGGTGGGAAATGAATATGT  
CACTAAGGGCCAAAGTGTGGACCAAGTCTACTACCCCAACAAGGAGGCCT  
TCAAATGTGAGGAGTGTGGGAAGCACTACAACACCAAGCTGGGATACAAG  
CGCCACATGGCCATGCACTCTGCAACTGCAGGGGATTTAACCTGTAAAGT  
GTGCATGCAGAGTTATGAGAGCACGCCATTCTCTGGAGCACCTCAAGA  
GCCACTCTGGGAAGTCCCTCGGGTGGCGCAAGGAGAAAAAACACCCTTGC  
GACCACTGTGACCGACGTTTTCTACACGCGGAAAAGATGTGAGACGGCATAT  
GGTGGTCCATACAGGCCGAAAGGACTTCCTGTGCCAGTACTGTGCCCAGC  
GCTTTGGCAGGAAAGATCACCTGACGCGCCATGTGAAGAAGAGCCACTCG  
CAGGAGCTGCTGAAGATTAAGACAGAGCCTCCGGATATGTTAGGTCTTTT  
AGCTACGGGGTCTCCACCCTGCTCTGTAAAGGAGGAGCTTACCCCATGA  
TGTGCGGCATGGGGGCCAACAAAGACCCCATGATGGGCAAATCGTCCCC  
AGTGGAGCACCTTTTCCGATGAGCATGTACAACCCCTACCCAT-----CT  
CCAGGCCATGTCTAATTCTGGGGTGGGTACCCA-----CACCCGTCCC  
TGATGCCAAGTACCTTGTCTGCAGCTATGGGCATGGGCTGTCACATGGAA  
TATCTCATCTACGCTTCTTTCTCATTTCATGGGATGTTTACAAATAAGTGA  
TGGATCAAATATTGTGAACTTGCTGGCTAGTAACTCTCCAAGCGTTTCTT  
ATGCACTTACCCAGCAGAAATACTTCAGTAATTATAGTCTGTGATTGGG  
TTTTATATTTATGAGCCCATTGAGTACTGGAACCTCACTGTGCAGGAGCA  
CCTGAAGACTCTGAGTCATGGCTTCAACAAGATCTCCTGGATGGACAAC  
TTTTCCACTACCTGCGGGTTGTGAATGTGAGTGCATCAACCAAGAGCGAC  
TTCATCACTATTCTAAAGGGTTCCTTCCGCGCAGCCCGGAGTACCAGCA  
CTTACAGAGGACATCATTTTCTCCAAGA---ACCGTGAAACTG-----  
ATGAATATGACATCATTTGCTTACGGATGTACTTGGTAGCACGGACCACA  
GAGAAGAAGCGGGAGGAGGTGGTGGAACTTTTGGAGAAGCTTCGGCCTTT  
GATGCTGATCAACAGCATCAAATTCATTGCCTTCAACCCAACGTTTGT  
TCATGGACCGCTACAGTCTCTGTGCTCTACCCATCCTGACCTCAGGC  
TTCAGCGTACTTACCATACTCATCCTCACTTTCTTCCCTGGTTCATCAACCC  
CTTGGGAAACTTCTGGCTAATTCTCACGGTTACATCCGTGGAGCTAGGCG  
TCTTGGGATTGATGNNNNNNNNNCAGTTTGAATGGCAGCCAGCTCTCCAGAATGTGTCT  
GCATCTTGCAATCTTGGCATAATTAATGGGCTCTCTGGATGGGCGTCCTC  
CGTGGATGACTCCAGAGCTGACACCATCACTCGACGCTTTCGCTATGATG  
TGGCACTGGTGTGAGCATTAAAGGATCTGGAGGAGGACATCATGGAGGGG  
CTGAGAGAGAGTGGGATGGAAGACAGTGCATGCACCTCGGGCTTTAGTGT  
CATGATTAAGGAATGCTGTGATGGCATGGGTGATGTCAGCGAGAAACAG  
GTGGAGGACCTGTTGTTCCCTGAGAAGGCTGTCCGTTTCTCTTTTACCATT  
ATGCTGTGTTTCTGTCCAGGCAGAAGGTGAAGCG-----  
-----GAGGAGGTTACCATTTTTCAGAGAGCCAAAGCCAAACT  
CAGAAGTGTCTGTAAGCCCCTTTGCCTGATGTTTGTGGATGAGTCAGAC  
CATGAGATGCTCACAGCCATCCTGGGGCCTATTGTTGCAGAGCGTAACGC

AATGAAAGAAAGCAGGCTCATCCTATCCATGGGAGGCCTGCTGCGCTCGT  
TTCGCTTCCACTTCAGGGGCACGGGTTACGATGAAAAGATGGTACGAGAG  
ATGGAGGGCCTCGAAGCTTCTGGATCCACATATATCTGCACTCTGTGTGA  
TTCCAGTCGTGCAGAGGCTGCTCAAAACATGGTGTACTACTCCATCACCC  
GCAGTCACGATGAGAACCTAGAGCGTTATGAAATATGGAGAACCAACCCC  
TTTTCTGAGTCTGTGGATGAGCTGCGAGACAGAGTCAAAGGAGTCTCTGC  
CAAGCCCTTCCCTGGAGACACAGCCGACATTAGATGCATTACACTGTGACA  
TCGGCAATGCCACTGAATTCTACAAAATCTTCCAGGATGAGATCGGAGAA  
GTGTACAAAAGGGT---AAAT---CCCAGTCGAGAGGAACGGCGCAGCTG  
GAGGGCAGCCTTAGATAAACAGCTGAGGAAGAAGTTGAAGCTGAAACCAA  
TAATGAGGATGAATGGGAACCTATGCCCGCAAGCTAATGACCCTGGAGGCT  
ATGGAGGTGGTGTGTGAACTAGTGCCCTCAGATGAGAGGAAAGAGGCCCT  
GAGGGAGCTTATGAGGCTCTACATCCAGATGAAGCCTGTGTGGCGCGCCA  
CCTGCCAGCCAAGGAGTGCCCTGACCAGCTATGCCGCTACAGTTTTAAC  
TCCCAGCGCTTTGCTGACCTCCTCTCCTCTACCTTTAAATATAGGTACAA  
TGGAAAAGATAACCAATTACCTGCACAAGACCCTGGCTCATGTGCCTGAAA  
TCATAGAGAGAGAGGGGTCCATAGGAGCCTGGGCCAGCGANNNNNNNNNNNNNNNNNNNNNNNNTCCTACAC  
TA

TTGAGATGGGTCTCTGGGGCCAGGTGGAAGGAGAACCCGCAGCCTTTC  
ACCTGTTCCATTGAAGAACCACCAAACAGACAAAAGTTCAAGGGTATCAA  
GACCTACATTTTCGTACCGGGTGACTCCAAGCCACACAGGGCATCCTGTGT  
ACAGACGATACAAACACTTTTGACTGGCTGTACAACCGCTTACTGCATAAG  
TTCACTGTGATCTCTGTGCCTCACCTCCCTGAGAAGCAGGCCACAGGGCG  
GTTTGAGGAAGACTTCATCGAGAAGCGTAAGAGGCGACTGGTACTGTGGA  
TGAATCATATGACCAGTCACCCAGTCCTCTCCCAGTATGAAGGCTTTGAG  
CACTTCTGATGTGTGCGGATGATAAACAGTGGAACCTGGGCAAGAGGGCG  
GGCGGAGAAAGACGAAATGGTGGGCGCCCATTTTCATGCTGACCCCTCAGA  
TCCCCACCGAGCACCAGGACCTTCAGGACGTTGAGGAGAGGGTCGACAAC  
TTCAAGGCTTTTGCCAAGAAAATGGACGACAGTGTGATGCAGCTCACGCA  
TGTTGCGTCGGAGCTGGTACGTAAACACCTTGGTGGTTTTAGGAAGGAGT  
TCCAGAGGCTGGGAAATGCCTTCCAGTCTATTAGCCAGGCATTCATGCTG  
GACCTTCCCTATAGATCAGACACCCCTCAACAATGCCATNNNNNNNNNNNNNNNNNNCGTTTCTCAAAC  
TGACCTCTTTGGGTTTCATCATTGGAGTCGGTGTGGTAGGGAACCTTCTG  
ATCTCCATCCTGCTGGTCAAAGACAAGAGCCTCCACCGAGCACCCCTACTA  
TTTTCTGCTGGACCTGTGCGCTTCTGATATTCTGCGTTCTGCTATCTGCT  
TTCCCTTTGTCTTACCTCAGTAAAGAATGGATCTGCCTGGACCTATGGT  
ACGCTAACCTGCAAAGTGATTGCCTTCCCTGGGTGTGCTCTCCTGTTCCA  
CACAGCATTCATGCTGTTTTGTGTGTCAGTGTACCCGCTACCTGGCCATTG  
CACATCACCGTTTTCTACACCAAGAGGCTGACTTCTGGACGTGTTTGGCT  
GTCATCTGCATGGTATGGACGTTGTCAGTGGCAATGGCGTTCCCAGCAGT  
TCTAGATGTAGGGACATACTCTTTTATCCGAGAGGAGGACCAATGCACAT  
TTCAGCACCGTTCCCTCAGGGCAAATGATTCACTGGGCTTCATGCTCCTG  
CTGGCGCTTATCCTCCTGGCCACACAGCTGGTTTACCTCAAACCTCATTTT  
CTTTGTCCACGACCGTCGAAAGATGAAGCCTGTCCAGTTCGTGCCTGCTG  
TCAGCCAGAACTGGACCTTCCATGGGCCAGGTGCCAGCGGGCAGGCGGCA  
GCCAACTGGCTAGCAGGATTTGGTTCGAGGCCCCACCCCGCCTACTTTGCT  
GGGCATCCGACAAAACAGCAACGCAGCAGGCGCAGGCGTCTACTAGTAT  
TGGATGAATTCAAAAACAGAGAAGAGGATTAGTAGGATGTTCTACATCATG  
ACGTTTTTATTCTGCTGCTGTGGGGGCCCTACCTAGTCGCTGCTATTG  
GCGGGTCTTTGCAAGGGGCCCTGTAGTACCTGGAGGCTACCTGACAGCAG  
CTGTATGGATGAGCTTTGCCAAGCTGGGGTCAATCCTTTTATTTGCATC  
TTCTCCAACAGGGAGGCCAAATCTCGCTTTCACCTGGCATGGGGACTGG  
TCCTGGCACGGAGC---GCAGCGTCCCACTCGGCAACAGCTTGTATCCC

CGCAGCAAACCGAGGAGCCCACTGTTGCCACCCCCCGCAGCGATGGTTT  
GTCACCC---CTGCCAACAACCGACTGGACTTTGCTGCCTCGGCATACGA  
CGCCGCC-----GATTTCCGCGGTAACGCGGCCACCTTGCTGTCCT  
ACGCAGCGGCCGGAGTGAAAGCTC-----TTCCCTGCCGACGGCGGGC  
TGCTCCAACCGGTCTCTTGGCTATTACGCAGACCCGTCTG---GTTGG--  
-GGAGGACGTACGCCCGCCGAGTACTGTGCCGTAATAGCAAATCCAGTT  
CGGTCTTTTCTGCTGGCCCTCTAACTCCATCGGTGGCAGAGCAGGCA--  
-CC---AATTACCTGT-----CCGAGGA---GGGA---GAATC---  
CATCACCGAGAGGTCACCA---AT---CGGTGGCTCGGAGGAA---A  
CCAAAGCCAAAGACATGAC---GTCCGA---GTCGAGCTGGATAGAG---  
ACGCCATCCTCTATTAAATCCATTGATTCAAGCGATTCTGGCATCTTTG-  
--AACAGGCCAAACGGAGAAGGATCTCACCGTCTGCAACACCG-----  
--GTACCAGAGACAGTGTCCCGTTAAAATCTGAGNNNNNNNCAACAGGCGAAGTCA  
CAGAGAGAGAAGTGGCGCTGGGGATAAACCCGTTTCGCGGATGGGATGGGC  
GCCTTTAAAATAAACACAGCTCCACGATATTGGCTCCGG---ACAGAC  
GGCGTTTTCTCTCAGGCG---CCCGGTAC---GCAGCAGCCGCTTGG  
GA---CACCATCA-----CCACCAACCCACGTTGGTTCA---TACTCC  
ACGGCGGCTTTCAACTCCACCAGGGACTTTCTCTTCAGAAATCGGGGTTT  
CGGGGATGCCGCCG-----GGCACAGCACAGTCTGTTTCGCCT  
C-----CGGAAGTTT---C-----GCAGGGCCACATGGACACTCA  
GATGCAGCGGGCACCTGCTCTTCCAGGGCTCCACGAG--CAGGCAGC  
GAGCCACGCTCTTTCGAACGTGGTCAACAGCCAGATGCGGCTGGGTTTCT  
CGGGGACATGTACGGCCGGCCGATCAGTATGGCCACGTTACGAGCCCC  
AGAT---CCGACCACTATGCCTCGACTCAGCTGCACGGCTATGGCCCTAT  
GAACATGAATATGGCCGA---CACCACGGAGCAGGGGCTTCTTCAGAT  
ACATGAGGCAGCCGATCAAACAAGAGCTCATCTGCAAGTGGATCGAACCA  
GAGCAGTTGTCAAATCCCAAAAAGTCGTGCAACAAAACTTTTAGCACGAT  
GCATGAGCTTGTGACCCATCTGACGGTGGAGCATGTGGGGGACCAGAGC  
AGACCAACCACATTTGCTTCTGGGAGGAGTGCTCCAGAGAAGGAAAGCCA  
TTCAAAGCCAAATACAACTTGTAATCATATCAGGGTACACACCGGAGA  
AAAACCTTCCCGTGTCCGTTCCCTGGCTGTGGCAA

>*Rhynchohyalus natelnsis*

AGCCTGCTAATTCGGGCCGAATTAAGTCAACCAGGGGCCCTTTTGGGAGA  
CGACCAAATTTATAATGTAATCGTAACAGCACATGCTTTTGTATAATCT  
TCTTTATAGTAATGCCTATCATAATCGGCGGATTTGGAAATTGATTAATT  
CCCTTAATGATTGGAGCTCCAGATATAGCATTCCCCGAATAAATAATAT  
AAGCTTTTGACTCCTCCCCCCTCCTTCCTCCTCCTTAGCCTCTTCCG  
GAGTTGAGGCTGGAGCTGGTACAGGCTGAACAGTATATCCCCCTTGGCA  
GGAAACCTTGCCCATGCAGGAGCCTCCGTAGACCTAACTATCTTCTCTCT  
CCACCTCGCTGGTATTTCCCTCAATTCCTGGCTCAATTAACCTTCAATCAA  
CTATTATTAATATAAAACCCCCGCCATCTCCCAATATCAAACCCCTCTT  
TTTGTCTGAGCCTTACTTATCACTACAGTCCTTCTACTCCTCTCACTCCC  
CGTCTAGCTGCAGGAATCACTATAATGCTTACGGACCGAAATTTAAACA  
CCACTTTCCTCGACCCCGCAGGAGGGGGGACCTATCCTTTACCAACAT  
CTATTCTGATTCTTTGGCCACCCAGAAGTCTATATTTTAATTCTTCCCG  
TTTCGGGATAATCTCCCATATTGTAGCCTACTACTCTGGTAAAAAAGAGC  
CTTTCGGCTATATAGGTATAGTATGAGCAATGATGGCTATTGGACTCCTG  
GGTTTCATTGTTTGGAGCTCACCATATATTTACAGTAGGAATAGATGTAGA  
CACCCGCGCCTA-----CTGCATCCGTCCAACCTGCCCTGGG  
CATGCTGCTGCTGTCCGATGCCACACGTGCACCAAGCTCTCAGAGCTCT  
CCTGGGGCATGTGTCTCAGCAACTTCCCTGCAATCTGCAAGACGGAGGAC  
TTCTGCAGCTGCCAAGGACATGGTGGTTTACAGTCTCCTGTCCCATGAGGA  
GCTGGAGACTGAGGACGAAAGGCTGGTCTACGAGGCCGCTCTCAACTGGG









GAAGAGTGTGCGGAGAAGGAAAACCATTCAAAGCTAAATACAAACTTGT  
AAATCATATCAGAGTACACACCGGAGAAAAACCGTTCCTCATGTCCATTCC  
CCGGCTGTGGCAAG

>*Rondeletia loricata*

AGTCTTCTCATCCGGCGGAACTAAGCCAACCGGGGCCCTCCTAGGAGA  
TGATCAAATTTATAACGTCATTGTTACGGCACACGCCTTTGTAATAATTT  
TCTTTATAGTAATACCAATTATAATTGGAGGATTCGGAAATTGACTGGTT  
CCCCTGATGATCGGGGCCCCAGACATAGCATTTCCTCCGAATAAATAATAT  
GAGTTTCTGACTTCTCCCCCATCCTTCCTACTACTCCTAGCCTCTTCTG  
GGGTAGAGGCAGGCGCTGGAACAGGGTGAACAGTTTATCCACCCCTTGCA  
GGAAACCTCGCACACGCAGGAGCCTCCGTAGACCTTACCATTTTCTCCCT  
TCATTTAGCAGGGTCTCCTCAATTCTGGGGGCCATTAACTTTATCACAA  
CCATTATTAATATGAAACCCCTGCAATTTACAGTACCAAACCTCCCTC  
TTTGTATGATCCGTTTGTAGTTACAGCCGTTTCTACTCCTCCTCCTACC  
CGTTCCTTGACAGCCGGTATTACCATACTACTAACCAGCCGTAACCTAAACA  
CCACTTCTTTGACCCGTCAGGAGGGGAGACCCCATCCTATAACCAACAC  
CTG-----  
-----  
-----  
-----  
-----TTTCTAGAGCGGAATCTTCACCCATCTAACTGCCTTGG  
CATGCTGTTGCTGTCTGACGCCACCAGTGTACCAAGCTATCAGAGCTCT  
CCTGGGCGATGTGCCCTCAGCAACTTTCCTGCTATTTGCAAGACAGAGGAC  
TTTCTCCAACCTGCCAAAGACATGGTGGTGCAGCTTCTGTCCCATGAGGA  
GCTGGAGACAGAAGATGAGAGACTGGTTTATGAAGCTGCCCTTAACGGG  
TCAACTATGACCTGGAAAGGAGGCACCTGCCACCTGCCAGAGCTGCTGAGA  
ACAGTCCGCCTGGCCCTGCTTCCCGCTATATTCTCATGGAGAATGTCTC  
CACAGAAGAGCTGATCAATGCCAGGCCAAGAGCAAGGAGCTGGTGGATG  
AGGCCATCTGCTGCAAGCTGAAGATCTTGCAGAATGATGGTGTGGTTAAC  
AGCCCATGTGCTCGACCGAGAAAACCAGCCATGCCCTCTTTCTGCTGGG  
AGGGCAGACCTTCATGTGTGACAAGCTGTATCTGGTGGACCAGAAGGCCA  
AAGAGATCATCCCAAGGCTGACATCCCAGTCCCAGGAAGGAGTTCAGC  
GCCTGCGCCATCGGCTGTAAGGTCTACATCACAGGTGGGA--GAGGCTC--  
AGAGAATGGTGTGTCAAAGATGTATGGGTCTATGACACTGTCCAGGAGG  
AATGGTCCAAGGCAGCACCATGCTCATTGCCAGGTTTGGTTCATGGCTCT  
GCTGAGCTGAAACACTGCCTCTACGTGGTAGGAGGNCACACAGCAGCAACT  
GGCTGTCTCCCAGCCTCTCCCTCCGGATGAATACATTTGTCGTGTTTCAGTC  
GTTCAACAACAAGGCTAATTTCTGAACGAAGCGGAGCTGATCATGACGCTG  
GCCAGGAATTTGAGATGAGAGTGGTTACAGTATCCCTGGAGGAACAAAC  
TTTTGCCAGCATTATCCAGGTGATCAGTGGGGCCTCCATGTAGTCAGTA  
TGCATGGAGCTCAGCTTGTACCTCACTCTTCTCCCTCCAGAGGAGCTGCT  
GTGGTGGAGCTGTTCCCTATGCTGTGAACCCAGAACAGTACACCCATA  
TAAAACCCTTGCCCTCCCTACCAGGCATGGACCTCAATACGTTTCTGGA  
GGAACACTATGGAGGAGAACACCATCACCCACCCAGACCGACCTGGGAA  
CAAGGAGGTATTGTCCATTTGGAAAAGGACGAGCAAGAGCGAATACTGGC  
CAGCAAGGACGTCCCCAGGCACCTGTGCTGTTCGCGACCCAGAGTGGCTCT  
TCCGAATCTACCAGGACACTTTGGTGGACATCCCTTCATTCCTGGAAGTC  
CTCAA--AGAGGGCCTGAGG---GCTAGGCCAGCTTGAGGAA---GGC  
CAAGCCGGCCAGCACGGTTCATCCAGGCCGGGTCAGAGAACCCAGTGCC  
ACACCTCAGTCCAAGCCACCAATGAGGCTAAACTCACGGTTTCTGGCAG  
ATCCCGTGGAATCTGAAATACCTGAAGGTGAGAGAAGTGAAGTATGAGGT  
GTGGATCCAGAAGAAGGATACCAGCAAGGGAACACTGGAGGATCAAATCA  
TCCAGGCAAACCTGCACTGGAAGCCTTTGGTAAACGCCAAAACACTGAGG

AATGACAACATCATCCCGTTTTGGAAAATTCATCCGAATTCACTTCGGAAC  
CAGTGGCAAGCTGTCTGCTGACATTGAGACTTACCTGCTGGAGAAGT  
CGCGTGTACCTTCCAGCTCAAGTCTGAGAGGAACTACCACATCTTCTTC  
CAGATCTTGTCCAATCAGAAGCCAGAGCTGCTGGAAATGCTGTTGATTAC  
CAACAACCCATATGACTACTCCTACATCTCCCAAGGAGAGGTAACAGTAC  
AATCCATCAACGACTCAGAGGAACTGATGGCCACTGACAACGCCTTCAAC  
GTGCTTGGCTTCACTCAAGAGGAGAAGAATGGAGTCTATAAGCTGACCGG  
TGCCATTATGACTATGGCAACATGAAGTTTAAAGCAGAAGCAGCGTGAGG  
AGCAGGCTGAGCCTGACGGAACGGAGGCTGCTGATAAGTCAGCTTACCTA  
ATGGGGCTGAACTCTGCAGACCTCATCAAAGGGCTGTGCCATCCCAGAGT  
CAAGGTAGGAAATGAATATGTCACCAAAGGCCAAGGTGTAGACCAAGTCT  
ACTACCCCAACAAGGAGGCCTTCAAGTGCAGAGGAGTGTGGCAAGCACTAC  
AACACCAAGCTGGGATACAAGCGCCATGTGGCCATGCACTCTGCCACGGC  
AGGGGACCTTACCTGTAAGTGTGCATGCAGAGCTACGAGAGCACGCCGG  
TGCTCCTGGAGCACCTCAAGAGCCACTCAGGGAAGTCTCGGGTGGCGCC  
AAGGAGAAAAAACACCCATGCGACCACTGCGACCGTCGCTTCTANACTCGG  
AAGGATGTAAGACGGCACATGGTGGTCCACACGGGGCCGAAAGGACTTCCT  
GTGCCAGTACTGTGCCCAGCGCTTTGGCAGGAAGGACCACCTGACACGGC  
ACGTAAAGAAGAGCCACTCGCAGGAGCTGCTGAAGATCAAGACAGAGCCT  
CCGGATATGTTAGGTCTTTTAGGTCTGCTCGCCGCCTTGCTCCGTCAA  
GGAGGAGCTTANCCCCATGATGTGCAGCATGGGTCCCAACAAAGACCCCAT  
GATGGGCAAACCGTTCCCCAGCGGAACCCCTTCCCGATGGGCATGTACA  
ACCCACCAC-----CTCCAGGCCATGTCCAATTCGAGGTTGGTTCAC  
CCC-----CACCCCTCCCTGATGCCTAGTTCCCTGTCTGCAGCTATGGG  
CATGGGCTGTACATGGAATATCTCATCTACGCCTCTTTCTCATTCATGG  
GATGTTTACAAATCAGTGATGGATCAAACATCGTGAACCTTGCTGGCTAGT  
AACTCTCCAAGCGTTTCATACGCTCTGACCCAGCAGAAATACTTCAGTAA  
CTACAGTCCCGTGATTGGGTTTTACATTTACGAGCCATTGAGTACTGGA  
ACTCCACGGTGCAGGAGCATCTGAAGACACTGAGTCACGGCTTCAACAAG  
ATCTCCTGGATGGACAACCTTCTTCCAYTACCTGCGGGTGGTGAACGTGAG  
CGCGTCGACCAAGAGCGAATTCATCACCGTCCCTCAGGGGCTCCTTCCTGC  
GCAGCCCGGAGTACCAGCACTTCACTGAGGACATMATCTTCTCCAAGA--  
-ACCGTGAGAGTG-----ATGAGTATGACATTATGTCCTCACGCATGTA  
CCTGGTGGCGCGGACCACGGAGAAAAAGCGCGAGGAGGTGGTGGAGCTTC  
TGGAGAAGCTGCGTCCGCTGATGCTGATCAACAGCATCAAGTTCATCGCC  
TTCAACCCACCTTTGTTTATATGGACCCTACAGCTCCTCTGTCTATCTC  
ACCCATCCTGACCTCAGGCTTACGCTGCTCACCATCCTCATCCTCACTT  
TTTTCTGCTCATCAACCCCTTGGGGAACCTTCTGGCTCATCCTGATGGTT  
ACTTCTGTGGAGCTGGGCGTCTTGGGTTAATG-  
NNNNNNNNNNNNNNNNNNNNNNNNNNNNNNNNNNNNNNNNNNNNNNNNNNNNNN  
NNNNNNNNNNNNNNNNNNNNNNNNNNNNNNNNNNNNNNNNNNNNNNNNNNNNNN  
NNNNNNNNNNNNNNNNNNNNNCTAAAGATTCGGAGG  
AGGACATCATGAAGAACTGAGAGAGTGTGGGCTTGAAGACAGTGCTTGC  
ACCTCAGGCTTCAGTTGTATGATCAAGGAATTCTGTGACCGCATGGAAGG  
TGTCAGCGAGAAGCATGGCGGAGGCC---ATGTCCCTGAGAAGCCTGTGC  
GTTTCTCTTTTACTATTATGTCTGTCTGTCTTGGCAGATAGAGCGGAG  
-----GAAGCGGTGACCATCTTCAG  
GGAGCCAAAGCCCAACTCGGAGCTGTCCTGTAAGCCCCTATGCCTGATGT  
TTGTGGATGAGTCAGACCACGAGACACTCACTGCTGTCTGGGGCCTGTA  
GTTGCAGAGCGTAATGCAATGAAGCAGAGTCGACTCATCCTATCTATGGG  
TGGGCTGCCTCGCTCCTTCCGCTTCCAATTCAGAGGCACAGGATATGATG  
AGAAGATGGTGCCTGAGATGGAGGGCCTGGAGGCTCAGGTTCCACCTAC  
ATCTGCACTCTGTGTGACTCCAGTCGGGACAGAGGCTCTCGCAACATGGT



CAGGCA---CC---AACTACCTGG-----CCGAGGA---TGGA---  
GACGC---CATCCCTACGGAGAGGTCCCCG---AT---CGGCGGCTCGGA  
GGAG---ACCAAACCCAAAGACCT-----GTCAGA---GTCGAGCTGGA  
TAGAG---ACGCCGTCTCCATTAAGTCAATTGATTCAGCGATTCTGGT  
ATCTTTG---AACAAAGCCAAAAGGAGAAGGATCTCGCCGTCTGCCACGCC  
G-----GTTTCAGACACTGTGTCCCCGTAAAATCTGAGCATCACT  
CAACAGGAGAAGTACAGAGAGAGAAGTGGCGTTGGGGATAAATCCGTTC  
GCGGAAGGGATGGGCGCCTTCAAAAATAACCACAGCTCCCACGACATTGG  
CTCCGG---ACAGACGGCGTTTTCTCCAGGCG---CCCGGCTAC---G  
CGGCGGCCCGCCTGGGA---CACCATCA-----CCACCCGACCCACGTT  
GGCTCT---TACTCCACGGCGGCTTTCAACTCCACCCGGGACTTTCTCTT  
CAGAAATCGGGTTTCGGAGACGCCACCGG-----GGCGCAGC  
ACAGTTTGTTCGCCTC-----CGGAAGTTT---C-----GCAGGG  
CCACATGGACACTCAGATGCGGCGGGGCACCTGCTCTTCCCGGGGCTCCA  
CGAG---CAGGCGGCGAGCCACGCGTCTTCCAACGTGGTCAACAGCCAAA  
TGCGACTGGGCTTCTCGGGGGACATGTACGGTTCGGGCCGATCAGTACGGA  
CACGTTACGAGCCCGAGGT---CCGACCACTATGCGTTCGACCCAGTTGCA  
CGGCTACGGCCCCATGAACATGAATATGGCCGCA---CACCACGGAGCAG  
GGCCTTCTTTTCGATACATGAGGCAGCCGATCAAAACAAGAGCTCATCTGC  
AAGTGGATCGAGCCGGAGCAGCTGACAAATCCYAAAAAGTCGTGCAACAA  
AACTTTTAGTACGATGCACGAGCTGGTGACCCATCTGACGGTGGAGCATG  
TGGGGGGCCAGAGCAGTCCAACCACATCTGCTTCTGGGAAGACTGCGCC  
AGAGAAGGGAAGCCATTCAAAGCCAAATACAAACTTGTGAATCATATCAG  
AGTACACACCGGAGAGAAACCCTTTCCTGTCGCCGTTCCCGGCTGTGGCA  
AA

>*Rosenblattia robusta*

AGCTTGCTCATTTCGAGCAGAGCTCAGCCAACCCGGCGCTCTCCTCGGAGA  
CGACCAGATTTATAACGTAATTGTTACAGCACATGCATTTGTAATAATTT  
TCTTTATAGTAATACCAATTATGATCGGAGGGTTCGAAACTGACTTATC  
CCCTTAATAATCGGCGCCCCGACATGGCTTTTCCACGAATAAATAATAT  
GAGCTTCTGACTTCTTCCCCCTTCTTCTTACTACTTCTCTCTTCTTCTG  
GGGTAGAGGCAGGGGCGGCACCGGATGAACGGTACCCCCCTCTTGCT  
GGTAATTTAGCCACGCAGGAGCCTCCGTCGATCTAACAATCTTTTCTCT  
ACATCTAGCAGGCATCTCCTCAATCTTGGGGCAATTAATTTTATTACAA  
CAATTATTAACATGAAACCCCTGCTATTTCCCAATACCAAACACCCCTA  
TTTGTGTGATCCGTAATAACACGGCCGTCCTTCTCCTTCTTTCCCTCCC  
CGTCTTGCTGCTGGCATTACTATGCTTCTTACAGACCGAAATCTTAATA  
CCACCTTCTTTGACCCGGCAGGAGGAGACCCCATCCTTTACCAACAT  
CTCTTTTGATTCTTCGGCCATCCAGAGGTCTATATTTAATTTCTCCAGG  
ATTTGGTATAATTTCCCATATCGTTGCCTACTACGCCGGCAAAAAAGAAC  
CTTTCGGCTATATAGGAATAGTATGAGCTATGATGGCTATTGGCCTCCTA  
GGCTTTATTGTATGAGCCCATCATATGTTTACAGTCGGAATGGACGTAGA  
CACTCGTGCATATTCCTAGAGAGAAACCTTACCCATCTAACTGCCTTGG  
CATGCTGTTGCTGTCTGACGCCCACAGTGCACCAAGCTGTCAGAGCTCT  
CCTGGGGCATGTGCCCTCAGCAACTTCCCGCTATTTGCAAGACAGAGGAC  
TTCTCCAACCTGCCAAAGATATGGTGGTGCAGCTTTTGTACACAGAGGA  
GCTAGAGACAGAAGATGAGAGACTGGTTTACGAAGCTGCCCTCAACTGGA  
TCAACTATGACCTGGAAAAGAGGCAC TGCAACCTTCCAGAGCTCCTGAGA  
ACGGTCCGTCTGGCCCTGCTGCCTGCAATCTTTCTCATGGAGAACGTTTC  
TACAGAAGAGCTGATCAACGTCCAGGCCAAGAGCAAGGAGCTGGTGGATG  
AAGCTATCCGCTGTAAGCTGAAGATCCTGCAGAAYGATGGCGTCGTTAAC  
AGCCCGTGCCTCGACCGCGAAAAACCAGCCATGCCCTCTTCTTCTGGG  
AGGGCAGACTTTCATGTGTGACAAGTTGTACCTGGTGGATCAGAAAGCCA

AAGAGATCATCCCCAAGCTGACATTCCCAGCCCCAGGAAGGAGTTCAGC  
GCCTGCGCCATCGGCTGTAAGGTGTACATCACTGGTGGGA--GAGGCTC-  
AGAGAAATGGTGTGTCCAAAGATGTGTGGGTCTACGACACCGTCCACGAGG  
AATGGTCAAAGGCGGCACCCATGCTCATTGCCAGGTTTGGCCATGGCTCT  
GCGGAGCTGAAACGCTGCCTCTATGTGGTAGGAGGTCACACCGCAGCAAC  
T-----GGATGAATACATTGTTGTGTTTCAGT  
CGTTCAACAACGAGGCTGATACTGAATGAAGCGGAGCTAATCATGGTGCT  
GGCTCAGGAGTTCAGATGAGAGTGGTCACGGTATCCCTGGAGGAACAGT  
CTTTGCCAGTATCGTCCAGGTTATCAGCGGTGCTTCCATGTTAGTCAGT  
ATGCATGGAGCTCAGCTTATCACCTCACTCTTCCCTCCCCAGAGGAGCTGC  
TGTGGTGGAGCTGTTCCCCTTTGCCGTGAACCCAGAGCAGTACACCCCAT  
ATAAAAACCTTGCCCTTCCCTTCCAGGCATGGACCTTCACTATGTCTCCTGG  
AGGAACACTAAGGAGGAGAACACTATCACCCACCCAGACAGACCCTGGGA  
ACAAGGGGGCATTGCTCATTTGGAGAAGGAGGACCAAGAGCGAAATACTGG  
CGAGCAAAGATGTCCCAGGCACCTGTGCTGCCGCAACCCAGAATGGCTC  
TTCCGGATCTACCAGGACACTTTGGTGGACATTCCCTCCTTCTTGGGAAGC  
CCTCAA---AGAGGGCATGAAG---ACAAAGCCAGCTTGAAGAA---GT  
CAAAGCCGGCCAGTACAGTCCACCCGGGCGGGTCAGGGAACCCAGTGT  
CAGACCTCAGTACAAACACTAATGAGGCTAAACTCACAGTCTCCTGGCA  
GATCCCATGGAATCTGAAATACCTGAAGGTGAGAGA-----  
-----AAAAAGACACCAGCAAAGGGACACTGGAGGATCAAATC  
ATCCAGGCGAACCTGCGCTGGAGGCCTTCGGCAACGCCAAAACATTGAG  
AAACGACAACCTCGTCTCGTTTTGGAAAATTCATCCGAATTCACTTCGGTA  
TGAGCGGCAAGCTGTCTGCTGCTGACGTCGAGACGTACCTGCTGGAGAAG  
TCACGTGTCACCTTTCAGCTCAAGGCAGAGAGGAACTACCATGTCTTCTA  
CCAGATCCTGTCCAATCAGAAGCCAGAGCTCCTGGACATGCTGCTGATCA  
CCAACAACCCGTACGACTACTCTTACATCTCCCAAGGAGAGGTAACGGTT  
GCCTCCATCAACGACTCGGAGGAGCTGATGGCCACCGACAGTGCCTTCGA  
TGTGCTTGGCTTCACTGCAGACGAGAAGATAGGCGTCTATAAACTGACCG  
GCGCCATCATGCACTACGGCAACATGAAGTTCAAACAGAAGCAGCGTGAG  
GAGCAGGCGGAGCCGGACGGGACGGAGTCTGCTGATAAAACAGCTTACCT  
AATGGGGCTGAACTCTGCTGACCTCATCAAAGGGCTGTGCCATCCCAGAG  
TCAAGGTAGGAAATGAATACGTACCAAAGGCCAAAGCGTGGACCAAGTC  
TACTACCCCAACAAGGAGGCCTTCAAGTGTGAGGAGTGTGGGAAGCACTA  
CAACACCAAGCTGGGATATAAGCGCCATGTGGCCATGCACTCTGCCACGG  
CAGGGGATCTCACCTGTAAAGTGTGCATGCAGACCTACGAGAGCACGCCC  
GTGCTCTTGGAGCACCTCAAGAGCCACTCCGGGAAGTCTTCGGGTGGCAC  
CAAGGAGAAAAAGCACCCGTGCGATCACTGTGACCGTCTGTTTCTACACGC  
GGAAGGATGTGAGACGGCACATGGTGGTCCACACGGGCGGAAAGGACTTC  
CTGTGCCAGTACTGTGCCAGCGCTTCGGCCGGAAGGACCATCTGACACG  
CCACGTGAAGAAGAGCCACTCGCAGGAGCTGCTGAAGATCAAGACGGAGC  
CTCCTGATATGTTAGGTCTTTTAGCGTCGGGGTCAACCACCCTGCTCTGTG  
AAGGAGGAGCTCAGCCCCATGATGTGCGGCATGGGTCCCAACAAAGACCC  
CATGATGGGCAAACCGTTCCCCAGTGGGGCCCTTCCCCGATGGGCATGT  
ACAACCCTCACCAT-----CTCCAGGCCATGTCTAATTCTGGGGTGGGT  
CACCCA-----CACCCGTCCCTGATGCCAGTTCCTTGTCTGCAGCTAT  
GGGCATGGGCTGTACATGGAATATCTTATCTACGCCTCTTTCTCATTCA  
TGGGATGTTTACAAAATCAGTGATGGATCAAATATCGTGAACCTGCTGGCT  
AGTAACTCTCCGAGTGTTCATACGCTCTGACCCAACAGAAATACTTCAG  
TAACTACAGTCCCCTAATTGGGTTTACATTTACGAGCCCATAGAGTACT  
GGAACTCCACGGTGCAGGAACACCTGAAGACTCTGAGTCATGGCTTCAAC  
AAGATCTCCTGGATGGACAACCTTTTCCACTACCTGCGGGTGGTGAATGT  
GAGTGCCTCAACCAAGAGCGACTTCATCACCATCCTCAAGGGCTCCTTCC

TGCACAGCCCAGAGTACCAGCACTTCACTGAGGACATCATATTCTCCAAG  
A---ACCGCGAGACTG-----ATGAGTACGACATTATCGCCTCACGGAT  
GTACTTGGTGGCACGGACGACAGAGAAGAAGCGTGAAGAGGTGGTAGAGC  
TTCTAGAGAAGCTTCGTCCGTTGATGCTCATCAACAGCATCAAGTTCATT  
GCCTTCAATCCTACATTTGTGTTTCATGGACCGCTACAGCTCCTCTGTCAT  
CTCGCCCATCCTGACCTCAGGCTTCAGCGTACTCACAATCCTCATCCTCA  
CTTTCTTCTGCTCATCAACCCCTTGGGGAACCTTCTGGCTCATCCTCACT  
GTAACGTCAATGGAGCTGGGCGTCTTGGGTTTGGATGGGCTTTCACCAGTT  
TGAATGGCAGCCGGCTCTCAGGAATGTGTCTACATCTTGCAATGTTGGCA  
TTATTAATGGGCTCTCTGGATGGACTTCCTCGGTGGATGACTCCCAACT  
GACACCGTCACTCGGCGGTTTTCGCTATGATGTGGCGCTGGCGTCAGCAAT  
AAAGGATCTGGAGGAGGACATCATGGAGGGGCTGAGAGAGAGTGGGATGG  
AAGACAGTGTGTGCACCTCAGGCTTCAGTGTTCATGATCAAGGAATCTTGT  
GATGGCATGGGCGATGTCAGCGAGAAACACGGTGGAGGACCACTTGTTC  
TGAGAAGGCTGTACGTTTCTCTTTCCTGTTATGTCTGTCTCTGTCCTGG  
CAGACGAAGAGGAG-----AAAGAG  
GTCACCATCTTACCAGGCCAAAGCCAAACTCAGAACTGTCCTGTAAGCC  
CCTTTGCCTGACGTTTGTGGATGAGTCAGACCWTGAGACACTCACAGCTG  
TCCTGGCGCCTCTAGTTGCAGAGCGTARTGCAATGAAAGAGAGCAGGCTC  
ATCCTATCCATGGGTGGACTAGCTCGCTCCTTCCGCTTTCCTTTCAGAGG  
CACGGGATACGATGAAAAGATGGTGCCTGAGATGGAGGGCCTCGAGGCCT  
CAGGGTCTCTACATCTGCACTCTTGTGACTCCGGTCGAGCAGAAGCC  
TCTCAAACATGGTGCTACACTCCGTCACCCGCAGTCATGAAGAGAACCT  
AGAACGTTACGAAATATGGAGAACCAACCCCTTTTCTGAGTCTGTAGATG  
AGCTGCGAGACAGAGTCAAAGGGGTCTCTGCCAAGCCCTTCATGGAGACC  
CATCCCACGCTGGATGCATTACACTGTGACATTGGCAATGCCACTGAGTT  
CTACAAAATCTTCCAGGACGAGATCGGGGAGGTGTACAAAAGGT---CA  
AC---CCAGCCGGGAGGAACGGCGCAGCTGGAGGGCAGCCCTAGATAAA  
GAGCTGAGGAAGAAGATAAAGCTTAAACCGGTAATGAGGATGAATGGGAA  
CTATGCCCGCAGGCTAATGACCCAGGAGTCTGTGGAGGTGGTGTGTGAGC  
TGGTGCCCTCAGAAGGGAGGAGGGAGGCCCTGAGGGAGCTTATGAGGCTC

-----TCGTACA  
CCATCGAGATGTGCCCTCGGGCCCCGGTGGAAAGGAGAGCCCACAGCCG  
TTCTCCTGCTCCATCGAAGACCCACAAAACAGACAAAGTTCAAGGGCAT  
CAAGACGTACATCTCGTACCGGGTCACGCCGAGCCACACGGGGCACCCCG  
TCTACAGGCGCTACAAACACTTCKACTGGCTGTACAACCGCCTGCTGCAC  
AAGTTCACTGTGATCTCCGTGCCTCACCTGCCTGAGAAGCAGGCCACGGG  
CCGATTCGAGGAAGACTTCATCGAGAAGCGCAAGAGGGCGACTGATACTGT  
GGATGAACCACATGACCAGTCAACCGTCTCTCCAGTACGAAGGCTTC  
GAGCACTTCTGATGTGCGCCGACGACAAGCAGTGGAAAGCTGGGCAAGAG  
GCGGGCGGAGAAGGACGAGATGGTGGGCGCCACTTCATGCTGACCCTCC  
AGATCCCCAACGAGCACCAGGACCTTCAGGACGTGGAGGAGCGGGTCGAC  
ACCTTCAAGGCCTTCGCTAAGAAAATGGACGACAGCGTGATGCAGCTCAC  
GCACGTCGCCTCGGAGCTGGTGCCTAAGCACCTGGGCGGGTTCAGGAAGG  
AGTTCAGCGGCTGGGAAACGCCTTCCAGTCTATCAGCCAGGCGTTCATG  
CTGGACCCCCCACAGCTCAGACACCTTCAACAACGCCATCTCCCAC--







TGTGCTTGGCTTCACTCCAGAGGAGAAGATGGGGATCTATAAGTTGACGG  
GTGCCATTATGCACTATGGCAACATGAAGTTCAAGCAGAAGCAGCGTGAA  
GAGCAGGCAGAGCCTGATGGCACAGAGGCAGCTGACAAGTCAGCCTACCT  
GATGGGGCTTAACTCTGCTGATCTTGTGAAGGGACTCTGCCATCCAGGG  
TCAAAGTCGGCAATGAGTATGTAACAAAGGGACAAGGTGTAGATCAAGTC  
TATTAC-----

-----TACCTGATTTACGCTTCCTTCTCGTTCA  
TGGGATGTTTACAAATCACAGACGGATCCAACATAGTCAACCTTTTGGCC  
AGCGACTCGCCGAGCGTGTTCGTATGCTCTGACTCAGCAGAAGTATTCAG  
CAACTACAGCCCAGTGATCGGGTTCATATCTACGAGCCCATTGACTACT  
GGAACTCCACTGTGCAGGAGCACCTCAAGACACTGGGCCAGGGATTCAAC  
ACGATATCGTGGATCGATAATTACTTTCAGTATCTGAAGGTGACGAACGT  
CAGCGCGTCGACCAAGAGCGACTTCATCGCCGTCCCAAGACCTCGTTCC  
TGAGGAGTCCCGAGTATCAGCACTTCACGGACGACATCATCTTTTCCAAA  
A---CGGGGG-----ACGACTTCGACATCATCGCGTCCAGGAT  
GTACCTGGTGGCGCGGACCACGGAGAAGACCCGGGAGGAGGTGGTGGAGC  
TGCTGGAGAGGCTACGCCCGCTCTCGCTCATCAACAGCATCAAGTTCATC  
GTGTTCAACCCACCTTCGTGTTTCATGGACCGCTACAGCTCCTCGGTCGT  
CTCCCCATCATGACGTCCGGATTACAGCGTCTGACCATTCTCGTGCTCA  
CGTTCTCCTCGTTCGTCGAACCCGCTGGGAAACTTCTGGCTGATCCTGACC  
GTCACCTCCGTGGAGCTGGGCGTTCTGGGCCTGATG-----

-----  
-----  
-----  
-----  
-----  
-----

-----TCCTACA  
CCATAGAGATGGGCCCCAGAGGCCCTGAGTGGAAGGAGAGCCCCAGCCT  
TTTGCTTGCTCCATTGAGGACCCCACCTAAGCAAACCAAGTTCAAGGGGAT  
AAAGACTTACATATCCTATCGCGTGACCCCCAGCCACATTGGCCGGCCTG  
TGTACCGTTCGCTACAAGCACTTTGACTGGCTGTATAACAGGCTGCTGCAC  
AAATTCACCGTCATCTCTGTGCCGCATCTGCCTGAGAAGCAGGCAACTGG  
GCGTTTCGAGGAGGACTTTATTGAAAAGCGCAAGAGGGCGGCTCATCCTCT  
GGATGGACCACATGACCAGTACCCGGTCTCTCGCAGTATGAGGGCTTC  
GAGCACTTCTTCATGTGCGGTGATGATAAACAGTGGAAGCTGGGCAAGCG  
GAGGGCGGAGAAGGATGAGATGGTGGGAGCCCACTTCATGCTCACCTTC  
AGATCCCCAATGAGCACCAGGACCTGCAGGATGTGGAGGAGCGGGTGGAC  
TCCTTCAAGGCCTTTGCCAAGAAGATGGACGACAGCGTCATGCAGTTAAC  
ACATGTGGCCTCCGAGCTGGTACGCAAACACCTGGGAGGGTTCCGCAAAG  
AATTCCAAAGGCTGGGGAACCTCCTCCAGTCCATCAGCCAGGCTTTCATG  
CTGGACCCTCCCTACAGCTCTGATGCCCTGAATAATGCCATCTCCAC--

-----  
-----  
-----  
-----  
-----  
-----  
-----  
-----  
-----  
-----  
-----  
-----  
-----  
-----  
-----  
-----  
-----  
-----  
-----

-----GCCAAATCCCGCTTT  
CACCATGGCGTCCGGCACGGGGCCTGGCACGGACC--GCAGCGTCCCCT  
C---AACAGCTTGCTATCCCGCAACAAACCGATGAGACCGCAGTGG---  
CCTCCCGCAGCGATGGTTTTGTCACCC---CTGCCAACAACCGACTGGAC  
TTTGCCGCCTCGGCATACGATGCCGCCGCTGCAGCTGATTTCCGCCGGTAA  
CGCGGCCACCCTTCTGTCTGTACGCAGCTGCCGGAGTGAAAGCGC-----  
TCCCACTGCCCACTGCAGGCTGCTCCAACAGAGCCCTAGGCTATTACGCA  
GAGCCGCCAG---GGTGG---GGCACACGCACTCCACCGCAGTACTGT--  
-----AGTAAATCAAGCGCGGTTCTCTCATGCTGGCCCGCCAATTCCG  
TCGGGAGCAGAACATCCA---CCTCCAATTACCTGG---TTGGATTGGAC  
GA---GGGG---GACGC---TATCGCACCTGAGAGGTCACCT---CT---  
CGGGGGGGCAGACGAA---GCCAAGCCAAAAGACCT-----GTTGGA--

-ATCAAGCTGGATAGAG---ACCCCGTCTTCAATTAAGTCCATCGACTCA  
AGTGATTCTGGGATCTTTG---AACAGGCCAAGCGGAGGAGAATTCGCC  
ATCTGCTACACCG-----GTTTCAGAGACGTCGTCCCCATTAAAAT  
CAGAACATCACTCAACAGGCCAAGTCACAGACAGAGAAGTGGCTTTGGGG  
ATAAATCCGTTCCGCCACGGGATGGGCGCTTTCAAATCAACCACAGCTC  
CCACGATCTTGGCTCGGG---GCAAACCTGCGTTTGCCTCGCAGGCG---C  
CCGGCTAC---GCAGCCGCTGCCCTGGGA---CACCATCA-----CCAC  
CCAACCCATGTCACTCC---TACTCCACCGCGGCGTTCAATTCCACCCG  
GGACTTTCTCTTTTCGGAATCGGGGATTCGGAGACGCCACTAG-----  
----CGCGCAGCACAGTCTCTTCGCCCTCAGC---TGCGGGAAGTTT---C  
-----GCAGGGCCACATGGACACACCGATGCCACGGGACACCTGCTCTT  
CTCGGGACTGCACGAG---CAAGCGGCGACCCACGCGTCTTCGAACGTGG  
TGAACAGTCAGATGCGCCTGGGCTTTTCGGGGGACATGTACGGCAGAGCC  
GAGCAGTACGGTCATGTAACGAGCCCCGGT---CCGAGCACTACGCTTC  
GACTCAGTTGCACGGCTATGGCCCCATGAACATGAATATGGCTGCC---C  
ACCACGGGGCAGGGGCTTCTTCCGTTACATGAGGCAGCCGATCAAACAA  
GAGCTCATCTGCAAGTGGGTGCAACCAGAGCAGCTGTGCAATCCGAAAA  
GTCTTGAACAAAACCTTTCAGCACGATGCACGAGCTCGTGACCCACCTCA  
CGGTGGAACACGTCGGGGGACCGGAACAATCGAATCACATTTGTTTTTGG  
GAAGAGTGTCCGCGAGAAGGGAAACCATTTAAAGCCAAGTACAAACTTGT  
AAATCATATCAGAGTGCACACCGGAGAGAAGCCGTTTCCATGTCCATTCC  
CCGGCTGTGGCAAA

>Ruvettus pretiosus

-----  
-----  
-----  
-----  
-----  
-----  
-----  
-----  
-----  
-----  
-----  
-----  
-----  
-----  
-----  
-----  
-----  
-----  
-----

-----TTCTAGAGAGAAACCTTACCCGACTAACTGCCTTGG  
CATGCTGTTGCTGTCCGACGCCCACAGTGCACCAAGCTGTCAGAGCTCT  
CTTGGGGCATGTGCCTCAGCAACTTCCCGCTATTTGCAAGACAGAGGAC  
TTCTCCAACCTGCCAAAGATATGGTGGTGCAGCTTTTGTACATGAGGA  
GCTGGAGACAGAAGATGAGAGACTGGTTTATGAAGCTGCCCTGAACTGGA  
TCAACTATGACCTGGAAAGGAGGCACGTGCACCTTCCAGAGCTCCTGAGA  
ACGGTCCGTCTTGCCCTGCTGCCCGCATCTTTCTGATGGAGAACGTCTC  
GACAGAAGAGCTGATCAATGCCAGGCCAAGAGCAAGGAGCTGGTGGATG  
AGGCTATCCGCTGTAAGCTGAAGATCCTGCAGAATGACGGCGTTGTTAAC  
AGCCCGTGTGCTCGACCAAGAAAAACCAGCCATGCTCTCTTTCTCCTGGG  
AGGGCAGACTTTCATGTGTGACAAGTTGTACCTGGTGGACCAGAAGGCCA  
AAGAGATCATCCCAAAGGCAGACATCCCAGCCCCAGGAAGGAGTTCAGC  
GCCTGTGCCATCGGCTGTAAGGTGTACATCACAGGTGGGA--GAGGCTC-  
AGAGAATGGCGTATCCAAAGATGTATGGGTCTATGACACCGTCCATGAGG

AATGGTCCAAAGCGGCGCCCATGCTCATCGCCAGGTTTGGTCATGGCTCT  
GCTGAGCTGAAACACTGCCTGTACGTGGTAGGAGGTCACACCGCAGCAAC  
TGGCTGCCTCCCTGCTTCTCCATCCGGATGAATACATCGTTGTGTTCACT  
CGTTCAACAACAAGGCTGATACTGAACGAAGCAGAGCTAATCATGGCGCT  
GGCCAGGAGTTCCAGATGAGAGTGGTCACAGTTTCCCTAGAGGAACAGT  
CTTTCCCCAGCATTGTCCAGGTGATCAGCGGTGCTTCCATGTTAGTCAGC  
ATGCATGGAGCTCAGCTTATCACCTCACTCTTCCCTCCCCAGAGGGGCTGT  
GGTGGTGGAGTTGTTCCCCTTTGCTGTGAACTCAGAGCAGTACACTCCAT  
ATAAAAACCTTGCCTCCCTTCCAGGCATGGACCTTCATTATGTTTCCCTGG  
AGGAACACTCAGGAGGAGAACACTGTCACCCATCCAGACAGATCCTGGGA  
ACAAGGAGGCATCGCTCACTTGGAGAAGGAGGAGCAGGAGCGAATACTGA  
CCAGCAAAGACGTCCCCAGGCACCTGTGCTGCCGCAACCCGGAGTGGCTC  
TTCCGAATCTACCAGGACACTTTGGTAGACATCCCTTCCCTTCCCTGGAAGT  
CCTCAA---GGAGGGAATGAAG---ACCAAGCCAGCTTGAAGAA---GT  
CCAAACCAGCCAGTACAGTCCATCCAGGCCGGGTCCAGAGAAGCCAGTGT  
CAGACCTCAGTACAAACCACCAATGAGGCTAAACTCACAGTCTCCTGGCA  
GATCCCCTGGAATCTGAAATACCTGAAAGTAAGAGAGGTGAAGTACGAGG  
TGTGGATCCAGAAAAGAGACACCAGCAAGGGAACCTCTGGAGGATCAAATC  
ATCCAGGCGAACCCGGCGCTGGAGGCCCTTCGGAATGCCAAAACGCTGAG  
AAACGACAACCTCGTCCCCTTTTGGAAAATTCATCCGAATTCACTTCGGAA  
ACAGCGGCAAGCTGTGCTCTGCTGACATCGAGACGTACCTGCTGGAGAAG  
TCTCGTGTACCTTTCAGCTAAAGGCTGAGAGGAACTACCACATCTTCTA  
CCAGATCCTGTCCAATCAGAAGCCAGAGCTGCTGGATATGCTGTTAGTCA  
CCAACAACCCGTACGACTACTCCTACATCTCCCAAGGAGAGGTAACCGTC  
GCCTCCATCAATGACTCGGAGGAGCTGATGGCCACCGACAGCGCCTTTGA  
TGTGCTCGGCTTCACTCTGGAGGAGAAGATGGGCGTCTATAAACTGACCG  
GCGCCATCATGCACTACGGCAACATGAAGTTCAAGCAGAAGCAGCGTGAG  
GAGCAGGCCGAGCCTGATGGGACTGAGGCTGCTGATAAATCAGCTTACCT  
GATGGGGCTGAACTCCGCTGACCTCATCAAAGGGCTGTGCCATCCCAGAG  
TCAAGGTAGGAAATGAGTATGTCACCAAAGGCCAGAGTGTGGACCAGGTC  
TACTACCCCAACAAGGAGGCCTTCAAGTGTGAGGAGTGTGGGAAGCACTA  
CAACACCAAGCTGGGATATAAGCGCCATGTGGCCATGCACTCTGCCACGG  
CAGGGGATCTCACCTGTAAAGTGTGCATGCAGAGCTACGAGAGCACACCT  
GTCTCCTGGAGCACCTCAAGAGCCACTCGGGGAAGTCCTCTGGCGGAGC  
CAAGGAGAAAAAGCACCCGTGCGACCCTGCGACCGCCGTTTCTACACGC  
GGAAGGATGTGAGACGGCACATGGTGGTCCACACGGGCCGAAAGGACTTC  
CTGTGCCAGTACTGTGCCAGCGCTTTGGCAGGAAGGACCATCTGACCCG  
CCACGTGAAGAAGAGCCACTCGCAGGAGCTGCTGAAGATCAAGACGGAGC  
CTCCTGATATGTTAGGTCTTTTAGCTTCGGGGTCAACCACCTTGCTCTGTG  
AAGGAGGAGCTTAGCCCCATGATGTGCGGCATGGGTCCCAACAAAGACCC  
CATGATGGGGAAACCGTTCCCCAGTGGCGCCCTTTTCCGATGGGCATGT  
ACAACCCCAACCAC-----CTTCAGGCCATGTCTAATTCTGGGGTGGGT  
CATCCA-----CACCCGTCCCTGATGCCAGCTCCCTGTCTGCAGCTAT  
GGGCATGGGCTGTACATGGAATATCTCATCTACGCCTCTTTCTCATTCA  
TGGGATGTTTACAAATCAGTGATGGATCAAACATGTGAATCTGCTGGCT  
AGTAACTCTCCGAGTGTTCGTACGCTCTGACCCAGCAGAAATACTTCA  
CAACTACAGTCCCCTGATTGGGTTTACATTTACGAGCCCATTGAATACT  
GGAACTCCACGGTGCAGGAGCACCTGAGGACTCTAAGTCACGGCTTCAAC  
AAGATCTCCTGGATGGACAACCTTTTCCACTACCTGCGGGTGGTGAATGT  
GAGTGGCTCGACCAAGAACGACTTTATCACCATCCTCAAGGGCTCCTTCC  
TGCGCAGCCAGAGTACCAGCACTTCACTGAGGACATCATATTCTCCAAG  
A---ACCGTGAGACTG-----ACGAATACGACATTATCGCCTCACGCAT  
GTATTTGGTGGCACGGACCACAGAGAAGAAGCGCGAGGAGGTGGTGGAGC

TTCTGGAGAAGCTTCGCCCGTTGATGCTGATCAACAGCATCAAGTTCATT  
GCCTTCAATCCCACGTTTGTGTTTCATGGACCGCTACAGCTCCTCCGTCAT  
CTCGCCCATCCTGACCTCAGGCTTCAGCGTGCTCACCATCCTCATCCTCA  
CTTTCTTCCCTGGTCATCAACCCCTTGGGGAACCTTCTGGCTCATCCTCACG  
GTTACATCCGTGGAGCTGGGCGTCTTGGGTTTGGATGGGCTTTCACCAGTT  
TGAATGGCAGCCAGCTCTCAAGAATGTGTCTCCATCTTGCAATGTTGGCA  
TTATTAATGGGCTCTCTGGATGGACTTCCCTCGGTGGATGACTCCCCACCT  
GACACCATCACTCGGCGGTTTTCGCTATGATGTGGCACTAGTGTGAGCATT  
AAAGGATCTGGAGGAGGACATCATGGAGGGGCTGAGAGATAGTGGGATGG  
AAGACAGTGCTTGACCCACAGGCTTCACTGTTATGATCAAGGAATCTTGT  
GATGGCATGGGTGATGTCAGCGAAAAGCACGGTGGAGGACCAGTTGTTCC  
TGAGAAGGCTGTACGTTTCTCTATCACTATTATGTCTGTCTCTGTCTGG  
CAGAGGATGAGGAG-----GAGGCG  
GTTACTATCTTACAGAGCCAAAGCCAAACTCAGAACTGTCCTGTAAGCC  
CCTTTGCCTGATGTTTGTGGATGAATCAGACCATGAGACACTCACAGCTC  
TCCTGGGGCCTATAGTTGCAGAGCGTGATGCAATGAAAGAGAGCAGGCTC  
ATCCTTTCCATTGGCGGCCTGCCTCGCTCCTTCCGCTTCCACTTCAGAGG  
CACGGGATACGATGAGAAGATGGTGCAGAGAGATGGAGGGCCTGGAAGCCT  
CAGGGTCCAGCTACGCTCTGCACTCTGTGTGATTCAAGTCGGGCAGAGGCA  
TCTGAAAACATGGTGCTACACTCCATCACC CGCAGCCATGAAGAGAACCT  
TGAACGTTACGAAATATGGAGAACCAACCCCTTTTCTGAGTCTGGAGAAG  
AGCTGCGGGACAGAGTCAAAGGGGTCTCTGCCAAGCCCTTCATGGAGACC  
CATTCTGCTCGCTGGATGCATTACATTGTGACATTGGCAATGCCACTGAGTT  
CTACAAAATCTTCCAGGATGAAATTGGGGAGGTGTACAAAAGG----CA  
AT---CCAGCCGGGAGGAACGGCGGAGCTGGAGGGCAGCCCTAGATAAA  
CAGCTGAGGAAGAAGTTGAAGCTTAAACCGGTAATGAGGATGAATGGGAA  
CTATGCCCGCAGGCTAATGACCCAGGAGGCTGTGGAGGTGGTGTGTGAGC  
TGGTGCCCTCAGAGGAGAGGAGGGAGGCCCTGAGGGAGCTTATGAGGCTA  
TACCTCCAGATGAAGCCTGTGTGGCGCGCCACCTGCCAGCCAAGGAGTG  
CCCTGACCAGCTGTGCCGCTATAGCTTTAACTCCCAGAGCTTTGCCGACA  
TCCTCTCCTCTACCTTCAAATATAGGTACAATGGAAAGATAACCAATTAC  
CTGCACAAGACTCTGGCCCATGTCCCTGAAATCATAGAGAGAGATGGATC  
CATCGGAGCCTGGGCCAGTGAGGGGAACGAGTCGGCAAACAAATCATACA  
CCATCGACATGGGTCTCTGGGGCCCCAGTGGAAGGAGAGCCCACAGCCT  
TTCTCCTGCTCCGTTGAAGACCCACAAAACAGACAAAGTTCAAAGGCAT  
CAAGACGTACATTTTCGTACCGGGTCACGCCGAGCCACACAGGGCATCCCG  
TCTACAGGCGCTACAAACACTTTGACTGGCTGTACAACCGCCTACTGCAC  
AAGTTCACTGTGATCTCCGTGCCCCACCTGCCTGAGAAACAGGCCACGGG  
GCGATTTGAGGAAGACTTTATTGAGAAGCGGAAGAGACGACTGATACTGT  
GGATGAACCACATGACCAGTCACCCCTGTCTCTCCAGTATGAAGGCTTT  
GAGCACTTCTGATGTGTGCTGACGACAAGCAATGGAAGCTGGGCAAGAG  
ACGAGCTGAGAAGGACGAGATGGTGGGCGCCATTTTCATGCTGACCCTCC  
AGATCCCTAACGAGCACCAGGACCTTCAGGATGTAGAGGAGAGAGTCGAC  
ACCTTCAAGGCCTTTGCTAAGAAAATGGACGACAGCGTCATGCAGCTCAC  
GCATGTCGCCTCGGAGCTGGTGCCTAAGCACCTGGGTGGATTCAGAAAGG  
AGTTCAGCGGCTGGGATATGCCTTCCAATCTATTAGCCAGGCATTCATG  
CTGGACCCTCCCCATGCTCAGACACCCTCAACAACGCCATCTCCCATCC  
TCTCGCCACGTTCCCTCAAACCTGACCTCTCTGGGTTCATCATTGGAGTCG  
GTGTGGTTGGAAACCTCCTGATCTCCATCCTGCTGGTCAAAGACAAGAGC  
CTGCACCGAGCGCCCTATTATTTCTTGCTGGACCTGTGCGCCTCCGATAT  
CCTTCGCTCTGCCATCTGCTTCCCCCTTTGTCTTCCACTCGGTCAAGAATG  
GCTCTGCCTGGACCTACGGCACGCTGACCTGCAAAGTGATCGCCTTCCTG  
GGTGTGCTCTCCTGTTCCACACGGCGTTCATGCTATTCTGCGTGAGCGT

CACCCGCTACCTGGCCATCGCACATCACCGTTTCTACACCAAGAGGCTGA  
CCTTCTGGACCTGTCTGGCTGTCATCTGCATGGTGTGGACGTTGTCAGTG  
GCTATGGCGTTCCCGCCGGTGTAGACGTAGGGACGTACTCTTTTATCCG  
AGAGGAGGACCAGTGCACATTCCAGCACCGCTCCTTCAGGGCGAATGATT  
CGCTGGGCTTCATGCTCCTGCTGGCGCTCATTCTCCTGGCCACACAGCTG  
GTTTACCTCAAGCTCATCTTCTTCGTCCACGACCGTCGAAAGATGAAGCC  
TGTCAGTTCGTGCTGCTGTCAGCCAGAACTGGACCTTCCACGGGCCAG  
GCGCCAGCGGGCAGGCGGGCGCCAAC TGGCTGGCCGGATTTGGTAGAGGC  
CCCACCCCGCCTACTTTGCTGGGCATCCGGCAGAACAGCAACGCAGCGGG  
CCGCAGGCGTCTACTGGTATTGGATGAATTCAAAACAGAGAAGAGGATTA  
GTAGGATGTTTACATCATGACGTTTTTCTTCTGACTGTGGGGGCC  
TATCTGGTAGCCTGCTACTGGCGGGTGTGTTGCAAGGGGCCCTGTAGTCCC  
CGGGGGCTACCTGACGGCAGCCGTGTGGATGAGCTTTGCCAGGCTGGGG  
TCAATCCTTTTCATCTGTATCTTCTCCAACAGGGAGGCCAAATCTCGCTTT  
CACCTGGCGTGGGGACTGGTCTTGGCACGGAGC---GCAGCGTCCCCT  
CGGCAACAGCTTGCTATCCCCGAGCAAACCGAGGAGCCCCTGTTGCCA  
CCCCCCGCGAGCGATGGTTTTGTACCC---CTGCCAACAACCGACTGGAC  
TTTTGCTGCCTCGGCATACGACGCCGT-----GATTTGCGCCGGTAA  
CGCGGCCACCTTGCTGTCTTACGCAGCGGCCGGAGTGAAGGCTC-----  
TTCCCTGCCGACTGCAGGCTGCTCCAACCGCCCTCTTGGCTATTACGCA  
GACCCGTGAG---GCTGG---GGAGGACGCACGCCGCCGAGTACTGCGG  
CGTAAATAGCAAATCCAGCTCGGTCTTTTCTGCTGGCCCGCTAACTCTA  
TCGGCGGCAGAGCAGGCA---CC---AACTACCTGG-----CCGAG  
GA---GGGA---GACTC---CATCCCGACGGAGAGGTCACCC---AT---  
C---GGCTCTGAGGAG---ACCAAACCCAAAGACATGAC---ATCAGA--  
-GTCGAGCTGGATAGAG---ACGCCGTCCTCCATTAAGTCCATTGATTCA  
AGCGATTCTGGTATCTTTG---AACAGGCCAAGAGGAGAAGAATCTCACC  
TTCTGCCACGCCG-----GTTTCAGAGACAGTGTCCCGTTAAAT  
CTGAGCATCACTCAACAGGCGAAGTCACAGAGAGAGAAGTGGCGTTGGGG  
ATAAATCCGTTTCGCGGATGGGATGGGCGCCTTCAAATAAACCACAGCTC  
CCACGATATTGGCTCCGG--ACAAACGGCGTTTTCTCCAGGCA---C  
CCGGCTAC---GCAGCAGCCGCCCTGGGA---CATACCA-----CCAC  
CCGACCCACGTTGGCTCT--TACTCCACGGCGGCTTTCAACTCCACCAG  
GGACTTTCTCTCAGAAATCGGGGTTTCGGGGACGCCACCGG-----  
----GGCGCAGCACAGTTTTGTTGCTC--------CGGAAGTTT---C  
-----GCAGGGCCACATGGACTCAGATGCAGCAGGACACCTGCTCTT  
CCCAGGGCTCCACGAG---CAAGCGGCGAGCCATGCGTCTTCCAACGTGG  
TCAACAGCCAGATGCGGCTGGGCTTCTCGGGGGACATGTACGGACGGGCC  
GACCAGTACGGCCACGTTACAAGCCC GCGGT---CCGACCACTATGCTTC  
GACCCAGTTGCACGGCTATGGCCCCATGAACATGAATATGGCCGCA---C  
ACCACGGAGCAGGGGCCCTTTCTTTCGATACATGAGGCAGCCGATCAAACAA  
GAGCTCATCTGCAAGTGGGTCGAGCCGGAGCAGCTGACGAATCCCAAAA  
GTCGTGCAACAAAACTTTTAGCACGATGCACGAGCTAGTGACCCATCTGA  
CGGTGGAGCATGTGGGGGGACCAGAGCAGACCAACCACATCTGCTTCTGG  
GAAGAGTGCTCCAGAGAAGGAAAGCCATTCAAAGCCAAATACAAACTTGT  
AAATCATATCAGAGTACACACCGGAGAAAAGCCCTTCCCGTGTCCGTTCC  
CCGGCTGTGGCAAA

>*Saccopharynx ampullaceus*

AGCCTACTTATTCGCACTGAAC TAAGTCAACCAGGAACAATACTAGAAGA  
TGACCAAATCTATAATGTAATTGTCACAGCACATGCATTCGTGATAATCT  
TCTTCATGGTTATAACAGTAATAATTGGGGGATTTGGAAACTGATTAGTC  
CCATTAATAATTGGAGCCCCAGACATGGCATTCCCTCGAATAAATAATAT  
AAGCTTCTGACTTTTACCCCCCTCGCTTCTTCTTTACTAGCATCCTCTG



GCATCGAAGCCGGGCTGGAACAGGTTGAACTGTTTATCCCCCTTAGCT  
GGAAACTTAGCTCATGCAGGAGCATCTGTAGACCTTACAATCTTTCTCT  
TCATCTAGCAGGCATTTTCCTCAATTCGGGGGCCATTAATTTTATTACAA  
CTATTATTAACATAAAAACCCCCGCCATCTCACAATACCAAACCCACTT  
TTTATCTGATCCGTCCTAGTAACCGCTGTACTTCTGCTACTCTCCCTACC  
AGTTTTAGCGGGTATTACAATACTCCTTACTGACCGAAACCTTAACA  
CAACCTTTTTTGACCCGGCTGGTGGGGGGACCCAATCCTCTATCAACAT  
CTA-----

-----GAACGAGTACATTGTGGTATTCAGC  
CGCTCTCTTAACCGGCTTATCCTGAACGAGGCAGAGCTGATCCTGGCACT  
AGCRCAGGAGTTCCAGATGAAGGTCGTTACCGTTTCCTGGAGGAGCAGT  
CCTTTACGGACATCGTCCGAGTCCCTCGGCAGGGCATCCATGCTGGTCAGT  
ATGCATGGTGCCAGCTCGTCACCTCTCTCTTCCTTCCTCGTGGAGCCGC  
TGTTGGTGGAGCTGTACCCGTATGCGGTCAACCCAGAGCATTATGCTCCCT  
ACAGAACACTGGCCTCGCTGCCGGCATGGACCTGCAGTACGTGGCTTGG  
AGGAACACCATGGAGGAGAACTCGGTGACCTTCCTGAGCGTGCCTGGGA  
CCAGGGTGGCATTGCACACTTGGAGAAGGAGGAACAGGAACGTATCGTGA  
ACAGCAAAGAGGTGCCGCGACACCTGTGCTGTGCGAACCCGGAGTGGCTC  
TTCCGCATCTACCAGGACACCAAGGTGGACATTGCGTCCCTTCTGGATGC  
TCTGCG---CCAGGGACTGACA---TCCAGGCCATGGCCCAAGAG---GG  
CTAGGCCCGCCAGCACAGTCCACCCAGGCAGGGTGAGGGAGCCCAAGTGC  
CAGACCTCCGTCACAGGCGACTAACGAGGCCAAGCTGATGGTTTCTTGCA  
GATCCCCTGGAACCTCAAGTACCTGAAGGTGAAGGAGGTGAAGTATGAGG  
TATGGATTCAAAAGAAGGATACCAGCAAGGGAACCCTGGAGGATCAAATT  
ATCCAGGCAAACCCAGCGCTGGAGGCTTTTGGCAATGCCAAGACTGCGAG  
GAATGACAACCTTTCACGTTTTTGGGAAATTCATTTCGATTTCATTTGGAG  
TAAGTGGCAAGTTGTCTCTGCTGACATAGAAACCTACTACTTGGAGAA  
TCTCGCGTACCTTTCAGCTCAAATCTGAGAGGAACTATCATATTTTCTA  
CCAGATCACATCCAACAAAAGCCTGAATTGCTGGACATGTTGTTGATCA  
CCAACAACCCATATGATTATGCTTATGTCTCCCAAGGAGAAGTGACTGTT  
GCATCCATCGATGACTCAGAGGAACTGATCGCCACAGACAGTGCCTTTGA  
TGTGCTGGGATTACGGCCGAGGAGAAGATGGGTGTCTATAAGCTAACAG  
GTGCCATCATGCATTATGGAAACATGAAATTC AAGCAGAAGCAGCGTGAG  
GAACAGGCCGAGCCTGATGGCACTGAGTCTGCTGACAAGTCAGCTTACTT



















-----ACGGCATTTCCTCCCAAGCT---CCCGGTAC---GC  
AGCCGCTGCCCTGGGA---CATCACCA-----CCATCCGACTCATGTCA  
GTTCT---TACTCTACGGCGGCTTTC AATTCCACCCGGGATTTTCTCTTC  
AGAAATCGAGGCTTCGGAGACGCCACCAG-----CGCTCAGCA











CTCAGCCCCATGATGTGCAGCATGGCTTCCAACAAAGACCACATGCTGGC  
CAAGCCGTTCCCCAGCGGCACCTCCTTCCCCATGGGCATGTACAACCCCC  
ACCAC-----CTCCAGGCCATGTCCAACCCTGAGGTGGGCCAC-----  
---CACCCTCTCTGATGCCTGGCTCCCTGTCCGCTGCCATGGGGATGGG  
CTGCCACATGGAGTACCTGATCTACGCCTCCTTCTCCTTCATGGGATGTT  
TACAAATCAGTGATGGATCCAACATCGTCAATCTCCTAGCCAGCAACACG  
CCCAGTGTGTCTACGCCACGACCAGCAGAAGTACTTCAGTAACTACAG  
CCCCGTGATCGGCTTCTACATCTATGARCCCATCGAGTACTGGAACCCA  
CGGTGCAGGAGCACCTCACAACGCTGAGCCAYGGCTTCAACAAGATCTCC  
TGGATGGATAACTACTTTCAGTATCTGAAGGTGGTGAATGTGAGCGCCTC  
GACCAAAAGTGATTTTCATCACCATCCTGCAGGGCTCCTTCCCTGCGCAGCC  
CGGAGTATCAGCACTTCATGGAGGACATCATTCTGTCCAAGACAGATGGR  
G-----ATGAAATGGAGATCATCGCTTCCAGGATGTACCTGGT  
GGCRMGGACCACGGAGAAGACCCGGGAGGARGTGGTGGARCTGCTKGAGA  
GGCTCCGCCCMCTYTCGCTCATCAACAACATCAAGTTCATCGTCTTCAAC  
CCCACCTTCGTCTWCATGGACCGTTACAGCTCCTCCGTRGTSTCACCCAT  
CCTCACMTRGCTTCAGCGTGCTCACCATCCTCATCCTCACCTTCTTCC  
TRGTCATMAACCCCTCTGGGGAACCTTCTGGTTGATCCTGACCGTCACCTCC  
GTAGAGCTGGGGGTCTGGGGCTCATGGGCTACCACCCCTTTGAGTGGCA  
GCCGGCCCTCAAGAGTGTGTCCACATCCTGCCATGTGGGGATCATTAAAG  
GGCTATCAGGGTGGGTCGCTTCGGTGGACGACTCCCAGCAGATACAGTC  
ACGCGTTCGGTTTCGCTACGACGTGGCCCTGGTGTGGCCCTGAAGGACCT  
GGAGGAGGACATCATGGAGGGGCTGAGAGAGCGAGGCCTGGAGGACAGTG  
CTTGCACCTCGGGCTTCAGCGTTATGATCAAGGAGTCTGCGATGGCATG  
GGGGACGTCAAGTGAAGCATGGCGGAGGGCCGGCCGTCCCGAAAAGGC  
TGTGCGTTTCTCCTTCACCATCATGTCCGTCTCTATTCAAGCTGAGGGAG  
AAGAT-----GAGGCGATCACCATT  
TTCCGGGAGCCCAAGCCCAACTCAGAGATGTCTGCAAGCCGCTCTGCCT  
GATGTTTGTGGACGAGTCGGACCACGAGACTCTCACAGGTGTCTGGGGC  
CTGTGGTGGCCGAAAGGAACGCTATGAAGCACAGCCGTCTCATCCTGTCT  
GTGGGCGGCCTTCTCGCTCCTCCGCTTCCACTTCCGGGGCACGGGCTA  
TGATGAGAAGATGGTGCAGAGATGGAGGGTTTGGAGGCCTCTGGCTCCG  
CTTACATCTGCACACTGTGTGACTCCACTCGGGCAGAGGCCTCCCAAAC  
ATGACTCTCCACTCTGTACCCCGCAGCCACGACGAGAACCTGGAGCGCTA  
CGAACTTTGGAGGACCAACCCCTCATCTGAGTCAGCTGAAGAGCTGCGAG  
ACCGAGTCAAAGGCGTCTCTGCCAAGCCCTTCATGGAGACCCAGCCACA  
CTGGACGCCCTGCATTGTGATATCGGCAATGCCACTGAGTTCTACAAGAT  
CTTCCAGGATGAGATAGGGGAGGTCTATCACAAGGC---AAAC---CCCA  
GCCGGGAGCAGCGTCGGAGCTGGCGGGCCGCCCTGGACAAGCAGCTGAGG  
AAGAAGATGAAGCTGAAGCCTGTGATGAGGATGAATGGGAACATGCACG  
GAAGCTGATGACCCGGGAGGCAGTGGAGGCAGTGTGTGAGCTGGTGGCT  
CAGAGGAGCGTCAGGAAGCCCTGAGGGAGCTGATGGGGCTCTACATCCAG  
ATGAAGCCTGTGTGGCGCTCCACCTGCCCGGCGAAGGAGTGCCAGACCA  
GCTCTGCCGGTATAGCTTCAACTCCCAACGCTTCGCAGAGCTGTCTCCA  
CCGTCTTCAAGTACAGGTATGACGGAAAGATCACCAACTACCTGCACAAG  
ACCTTGGCCCATGTGCCAGAGATTGTGGAGAGGGATGGCTCCATCGGGGC  
CTGGGCCAGCGAGGGGAATGAGTCTGGGAACAAGTCGTACACCATTGAGA  
TGGGCCCCAAAGGGCCTCAATGGAAAAGACAGCCCCACACCTTCTCTTGC  
TCCATCGAGGACCCTACCAAGCAGACCAAGTTCAAAGGCATCAAGACCTA  
CATATCGTACCGAGTGACCCCAAGCCACAATGCGAGGCCTGTGTACCGGC  
GTTACAAGCACTTCGACTGGTTGTACAACCGTCTACTGCACAAGTTCACC  
GTCATCTCCGTGCCCCACCTGCCCCGAGAAACAGGCAACAGGGCGCTTCGA  
AGAGGACTTCATCGAGAAGCGCAAGAGGGCGGCTGATCCTCTGGATGGACC



ACATGACCAGCCACCCGGTCTTGTCGCAATACGAGGGCTTCGAGCACTTC  
CTCATGTGCGCTGACGACAAGCAGTGGAAGCTGGGCAAGCGGCGGCAGAG  
GAAGGACGAGATGATGGGCGCCAACTTCATGCTTACCTTCCAGATCCCAA  
ATGAGCACCAGGACCTGCAGGACGTGGAGGAACGTGTGGACTCCTTCAAG  
TCCTTCGCCAAGAAAATGGATGACAGCGTCATGCAGCTTACGCATGTGGC  
CTCAGAACTGGTGCGGAAGCACCTTGGAGGCTTCCGGAAGGAATTCAGC  
GGCTGGGGAACGCCTTCCAGAACGTCAGTCAGGCGTTCATGCTGGACCCT  
CCCCACTGCTCGGACGCCCTCAACACCNNNNNNNNNNNNNNNNNNNNNNNNNNNNNNNNNNNNNNNNNNNNNNNNNNNNNNNNNNNNTCCC  
TGGGTTTTATCATTGGAGT  
CGGCGTCGTTGGCAACCTCCTGATCTCCATCCTACTGGTCAAAGACAAGA  
GCCTGCACCGTGCACCGTACTACTTCCCTGCTGGACCTGTGCGCCTCGGAC  
ATTCTGCGCTCCGCCATCTGCTTCCCCTTTGTTTTACCTCCGTCAAGAA  
TGGTTCACCTGGACGTACGGCACGCTTACCTGCAAAGTGATAGCCTTCC  
TGGGGGTGCTGTCTGCTTTTACACAGCGTTCATGCTCTTCTGTGTGAGT  
GTGACACGCTACCTGGCCATAGCCACCACCCTTCTACACCAAGAGGCT  
CACCTTCTGGACGTGTCTGGCAGTTATCTGCATGGTGTGGACGTTGTGCG  
TGGCCATGGCCTTTCCCCCGGTGCTGGACGTGGGGACGTACTCCTTCATA  
AGGGAGGAGGACCAGTGTACGTTCCAGCACCGCTCGTTCAGAGCCAACGA  
CTCCCTGGGCTTCATGCTGCTCCTCGCCCTGATCCTTCTGGCCACCAGC  
TTGTCTACCTCAAGCTAATCTTCTTCGTCCATGACCGACGGAAGATGAAA  
CCGGTCCAGTTCGTGCCTGCCGTCAGCCAGAAGTGGACCTTCCATGGCC  
CGGGGCCAGCGCCAAGCAGCGGCTAAGTGGCTGGCGGGGTTCCGGCAGGG  
GCCCCACCCCGCCACCCTGCTGGGGATCAGGCAGAACAGCAATGCAGTG  
GGCCGCGACGCCTGCTGGTGTGACGAGTTTAAGACTGAAAAGAGGAT  
AAGTAGGATGTACTTCATCATGACCTTCTTCTTCTCACGCTCTGGGGCC  
CCTACCTAGTGGCCTGCTATTGGAGGGTGTGTTGCCAGGGGCCCCGCGGTA  
CCAGGGGGGTACCTGACCGCGGCGGTGTGGATGAGCTTCGCCCAGGCGGG  
AGTCAACCCCTTATCTGCATCTTCTCCAACAGGGAGGCCAAATCTCGCT  
TTCACCCTGGCGTAGGGACTGGTCTGGCACGGACC---GCAGCGTCCCA  
CTTTGTAACAGCTTGTATCCCCGCAACCAACCGAAGAGCCCACAGTTG-  
--CATCCCCGACGATGGTTTTGTCACCC---CTGCCAATAACCGACTGG  
ACTTTGCCGCTCGGCATACGATGCCGCCGCGGCTGCTGATTTTGCCGGT  
AACGCGGCCACCCTGCTGTATATGCAGCCGCTGGAGTAAAGGCC---  
--TTCCCCTGCCACTGCAGGGTGTCAAGCAGACCTCTCGTTACTATG  
CCGACCCATCCG---GCTGG---GGCACACGCACACCACCCAGTACTGC  
-----AGTAAGTCTAGCCCTGTTCTATCCTGCTGGCCACAAATTC  
TGTTGGTGGCAGATCAGGCA---CCTCTTACTACCTGG-----TTG  
ATGA---AGCC---GACAC---CATCCCAACAGAAAGGTCACCC---AT-  
--CGGAGGGTCTGATGAG---GCAAAAACCAAAAGACTT-----ATCCGA  
---ATCCTGCTGGATAGAG---ACGCCGTCTTCAATCAAGTCGATTGATT  
CAAGTGATTCTGGTATTTTTG---AGCAAGCTAAACGGAGAAGAATTTCA  
CCGTCTGCCACACCG-----GTTTCGGAAA-----CCCAGTTGAA  
ATCTGAG-----ACAGGCGAAGTCACAGAAAGAGAAGTGGCTTTGG  
GGATAAATCCGTTTCGACAGCGGGATGGGAGCTTTTAAAATCAACCACAGC  
TCCCACGACCTGGGCTCCGG---CCAGACGGCGTTCCTTCCCAGGCT--  
-CCCGGCTAC---GCTGCTGCCGCCCTGGGT---CACCACCA-----CC  
ACCCGACGCACGTGAGTCC---TACTCCACCGCAGCCTTCAACTCCACC  
CGGGACTTTCTCTTCCAGAAACCGGGGCTTCGGGGATGCCACCAG-----  
-----CGCGCAGCACAGCCTGTTYGCCTCSGC---AGCGGGAAGTTT--  
-T-----GCAGGGCCACATGGACACTCYGATGCCGCGGGGCACCTGCTC  
TTCCCGGGACTCCACGAG---CAAGCCGCAAGTCATGCATCATCTAATGT  
CGTCAACAGCCAGATGCGCCTTGGCTTTACCGGGGACATGTACGGCCGGG  
CTGACCAGTATGGCCACGTTACGAGCCCCGAT---CCGACCACTACGCC

TCTTCCCAGCTGCATGGATATGGTCCCATGAACATGAACATGGCGGCT--  
-CACCACGGGGCAGGGGCCTTCTTCCGATACATGAGGCAGCCCATCAAAC  
AGGAGCTCATCTGTAAGTGGGTCGAGCCCCGAACAGTTGTGCAACCCAAA  
AAGGCTTGCAACAAAACGTTTCCAGCAGATGCACGAGCTTGTGACCCACCT  
GACCGTGGAGCATGTGGGGGGACCGGAGCAGTCGAACCATATTTGCTTTT  
GGAAAGAGTGCCTCCGAGAAGGAAAACCATTCAAAGCCAAATACAAACTG  
GTAAATCATATCAGAGTACACACCCGGAGAGAAACCATTCCCA-----

>Samariscus latus

-----  
-----  
-----  
-----  
-----  
-----  
-----  
-----  
-----  
-----  
-----  
-----  
-----  
-----  
-----  
-----  
-----  
-----  
-----  
-----

-----NNNNNNNNNGAAACCTTACCCAACTAACTGCCTTGGCATGCTGTTG  
CTGTCTGATGCCCACCAGTGCACCAAGCTGTGAGAGCTCTCCTGGGGTAT  
GTGCCTCAGCAACTTCCCGCTATTTGCAAGACAGAGGACTTCCTCCAAC  
TGCCCAAAGATATGGTGGTGCAGCTTTTGTACATGAGGAGCTAGAGACA  
GAAGATGAGAGACTGGTTTATGAAGCTGCCCTTAACTGGATCAACTATGA  
CCTGGAAAAGAGACACTGCCACCTTCCAGAGCTCCTGAGAACGGTCCGCC  
TGGCCTTGCTGCCTGCCATCTTTCTCATGGAGAACGTGTCTACAGAAGAG  
CTGATCAACGCAAAGCCCAAGAGCAAGGAGCTTGTGGATGAAGCTATCCG  
CTGTAAGCTGAAGATCCTGCAAAACGATGGTGTGCTTAAACAGCCCATGTG  
CTCGACCAAGAAAGACCAGCCATGCCTTATTTCTTCTGGGAGGGCAGACT  
TTCATGTGCGACAAGTTGTACTTGGTGGACCAGAAAGCCAAAGAGATCAT  
CCCCAAGGCCGACATTTCCAGCCCCAGGAAGGAGTTCAGCGCCTGCGCCA  
TCGGATGTAAGGTGTACATCACTGGTGGGA--GAGGCTC-AGAGAATGGT  
GTGTCAAAGATGTGTGGGTCTATGACACAGTCCAAGAGGAATGGTCAA  
GGCAGCACCCATGCTCATTGCCAGGTTTGGCCATGGCTCTGCAGAGCTGA  
AACACTGCCTCTACGTAGNNNNNNNNNNNNNNNNNNNNNNNNNNNNNNNNNNNNNNNNNNNNNNNNNNNNNNNNNNNNNNNNNNNNNNNNNNNNNNNGGAGG  
ATTATATTGTTCTCTTCAGTCGCTTGA  
CCACGAGGTTAATTGTAACGAAGCCGAGCTGATCCTGGCCCTGGCACAG  
GAGCTTCAAATGAGAGTCGTCACCGTGTGCGCTGGAGGAACAGTCTTTCTC  
AAGTATTGTTCAAGGTGATTAGTGGCGCTTCCATGTTAGTCAGCATGCATG  
GAGCGCAGCTCATTGCCCTCACTTTTCTACCCAGAGGCGGACTGTGGTA  
GAACTGTTCCCCTTGTGTGAATCCAGAGCAGTACACACCCTACAAAAC  
CCTGGCCTCCATTCCAGGAATGGAAC T TCACTACATTTTTCATGGAGGAACA  
TCAAAGAGGAAAACACCGTCAACCACCCAGACCGGCCCTGGAATCAAGGC  
GGTATCGCTCATTAGAGAAGGAGGAGCAGGAGCGGATTCTGGCCAGTAA  
AGAAGTCCAGAGACACCTCTGCTGTCGCAACCAGAGTGGCTGTTCAGGA  
TCTATCAGGACACTTTAGTGGACATTCCTGCTTTTCCCTCAAAGTCTTGAG--  
--AGAAGGCAAGAAC--GCTAAGCCAGCTTTAGGAA--ATCAAACC

TGCGAGCACAGTTCACCCCGGCCGAGTAAGAGGACCCAGTGTCAGTCCT  
CTGTTCAAACCACCAATGAGGCCAACTTCAAGTATTCTGGCAGATGCC  
TGGAATCTAAAGTTCTGAAGGTGAGAGAGGTCAAATACGAAGTGNNNNNNNNN-----

-----  
-----  
-----  
-----  
-----  
-----  
-----  
-----  
-----  
-----  
-----  
-----  
-----  
-----  
-----

-----  
NNNNNNNNNNNNNNNNNNNNNNNNNNNNNNNGGGAAGCACT  
ACAACACCAAGCTGGGCTATAAACGCCACATGGCCATGCACTCAGCCACA  
GCAGGGGACCTCACCTGTAAAGTTTGCATGCAAAGCTACGAGAGTACACC  
TGTTCTCCTGGAGCACCTCAAGAGCCACTCTGGAAAGTCCTCAGGTGGTG  
CCAAGGAGAAAAAACACCCATGTGACCCTGTGACCGCCGCTTCTACACG  
CGGAAGGATGTGAGAAGGCACATGGTGGTCCATACAGGTAGAAAGGACTT  
CCTGTGCCAGTACTGTGCCAGCGCTTTGGTAGGAAGGACCACCTGACAC  
GTCATGTGAAGAAGAGCCACTCACAGGAGCTGCTGAAGATCAAGACCGAG  
CCACCTGATATGTTAGGTCTGTTAGCCTCTGGATCATCACCCTGCTCCGT  
GAAGGAGGAGCTCAGCCCATGATGTGTGGCATGGGTCCCAACAAAGATC  
CCATGATGGGCAAATCTTTCTCCAGCGGGGCCCTTTTCCAATGGGTATG  
TACAACCCACCACAT-----CTCCAGACAATGTCTAATCCCAGCGTGGG  
TCACCCA-----CACCCGTCACTTATGCCAGCTCCTTGTCTGCAGCTA  
TGCCCATGGGCTGCCANNNNNNN-----

-----  
-----  
-----  
-----  
-----  
-----  
-----  
-----  
-----  
-----  
-----  
-----  
-----  
-----  
-----

-----  
NNNNNNNNNNNNNNNNNNNNNNNNNNNNNNNNNNNNNNNNNNNGTCTTGCAATGTCGGCATCA  
TCGACGGACTCTCCGGATGGGACTCCTCATTGGACGACGCCCCAGCCAAT  
ACCATCACTCGGAGATTTTCGCTACGATGTGGCACTGGTGTCCGCATTTAA  
AGATGTTGAAGAGGACGTGATGGAGGGGCTGAGAGAGAGTGGGATGGAGG  
ACAGCACTTGACATCTGGTTTTAGAGTCCTCATCAAAGAGTGCTGCGAT  
GGCATGGGCGATGTCAGCGAGAAGCACGGCGGAGGACCGGCCGTCCCGGA  
GAAGGCCGTGCGCTTCTCGTTACCATCATGTCCGTCTCCGTCTGGCAG  
ATGGGCAAGAG-----GAGGAGGTG  
ACCATCTTACAGAACCAAAGCCAAACTCAGAACTGTCCTGTAAGCCCCT





GCTGGAGACAGAAGATGAGAGACTGGTTTATGAAGCCGCCCTGAACTGGA  
TCAACTATGAYCTGGAAAGGAGGCACTGCCACCTTCCAGAGCTCCTGAGA  
ACAGTTCGTCTTGCCCTGCTGCCC GCCATCTTTYTAATGGAGAATGTCTC  
AACAGAAGAGCTGATCAATGCCAGGCCAAGAGCAAAGAGTTGGTGGATG  
AGGCTATCCGCTGTAAGCTGAAGATCCTGCAGAATGACGGTGTCTTAAC  
AGCCCGTGTGCTCGACCAAGAAAAACCAGCCATGCTCTCTTTCTCCTGGG  
AGGGCAGACTTTCATGTGTGACAAGTTGTACCTGGTGGACCAGAAGGCCA  
AAGAGATCATCCCGAAGGCAGACATTCAGCCCAAGGAAGGAGTTCAGC  
GCCTGTGCCATCGGCTGTAAGGTATATATCACAGGTGGGA--GAGGCTC-  
AGAGAATGGCGTGTCCAAAGATGTATGGGTCTATGACACCGTCCATGAGG  
AATGGTCCAAAGCGGCACCCATGCTGATTGCCAGGTTTGGTCATGGCTCT  
GCCGAGCTGAAACACTGCCTGTACGTGGTAGGAGGTCACACCGCAGCAAC  
TGGCTGCCTACCTGCTTCTCCATCCGGATGATTACATTGTTGTGTTTCA  
CGTTCAACAACAAGGCTGATACTGAATGAAGCCGAGCTAATCATGGCGCT  
GGCCAGGAGTTCCAGATGAGAGTTGTACAGTTTCTCTAGAGGAACAGT  
CTTTCCCCAGCATTGTCCAGGTGATCAGTGGTGGCTTCCATGTTAGTCAGC  
ATGCATGGAGCTCAGCTTATCACCTCACTCTTCCCTCCCCAGAGGAGCTAC  
TGTGGTGGAGCTGTTCCCTTTGCTGTGAACTCAGAGCAGTACACCCCAT  
ATAAAACCTTGCCTCCCTTCCAGGCATGGATCTTCATTATGTTTCCCTGG  
AGAAACACTCAGGAGGAGAATACTATCACCCATCCAGACAGACCCCTGGGA  
ACAAGGAGGCATCACTCACTTGGAGAAGGAGGAGCAGGAGCGAATACTGA  
CCAGCAAAGACGTCCCCAGGCACCTGTGCTGCCGGAATCCGGAGTGGCTC  
TTCCGAATCTACCAGGACACTTTGGTAGACATCCCTTCCCTTCCCTGGAAGT  
CCTCAA---GGAGGGAATGAAG---ACCAAACCCAACCTTAAAGAA---GT  
CCAAACCAGCCAGTACAGTCCATCCCGGCCGGGTCAGAGAAGCCCAATGT  
CAGACTTCAGTACAAACCACTAATGAGGCTAAACTCACAGTCTCCTGGCA  
GATCCCGTGGAAATCTGAAATACCTAAAAGTAAGAGAGNNNNNNNNNNNNNNNNNNNNNNNNNNNNNNNNNAAAAGAGAC  
ACCA

GCAAGGGAACCTCTGGAGGATCAAATCATCCAGGCAAACCCGGCGCTGGAG  
GCCTTTGGAAACGCCAAAACGCTGAGAAATGACAACCTCGTCCCGTTTTGG  
AAAATTCATCCGAATTCACCTCGGAAACAGTGGCAAGCTGTCATCCGCTG  
ACATCGAGACGTATCTGCTGGAGAAGTCTCGTGTACCTTTTCACTCAAG  
GCTGAGAGGAACTACCACATCTTCTACCAGATCCTGTCCAATCAGAAGCC  
AGAGCTGCTTGACATGCTGTTGATCACGAACAACCCATACGACTACTCCT  
ACATCTCCCAAGGAGAGGTAACGGTCCGCTCCATCAATGACTCGGAGGAG  
CTGATGGCCACCGACAGCGCCTTCGATGTGCTCGGCTTCACTCCGGAGGA  
GAAGATGGGCGTCTATAAACTGACCGGCCATCATGCACCACGGCAACA  
TGAAGTTCAAGCAGAAGCAGCGTGAGGAGCAGGCCGAGCCTGATGGGACA  
GAGGCTGCTGACAAAATCCGCCTACCTGATGGGGCTGAACTCTGCTGACCT  
CATCAAAGGGCTGTGCCATCCCCAGTCAAGGTAGGAAATGATTATGTCA  
CCAAAGGCCAGAGTGTGGACCAAGTCTACTACCCCAACAAGGAGGCCTTC  
AAGTGTGAGGAGTGTGGGAAGCACTACAACACCAAGCTGGGATATAAGCG  
CCATGTGGCCATGCACTCTGCCACAGCAGGGGATCTTACCTGTAAAGTGT  
GCATGCAAAGCTATGAGAGCACACCTGTTCTCCTGGAGCACCTCAAGAGC  
CACTCAGGAAAGTCTCTGGTGGAGCCAAGGAGAAAAACACCCGTGCGA  
CCACTGTGACCGCCGTTTCTACACACGGAAGGATGTGAGACGGCACATGG  
TGGTCCACACGGGCCGAAAGGACTTCCCTGTGCCAGTACTGTGCCACGCGC  
TTTGGCAGGAAGGACACTTGACCCGCCACGTGAAGAAGAGCCACTCGCA  
GGAGCTGCTGAAGATCAAGACGGAGCCTCCTGATATGTTAGGTCTTCTGG  
CTTCGGCATCACACCTTGTCTGTAAAGGAGGAGCTTAGCCCCCTTGATG  
TGTGGCATGGGTCCCAACAAGACCCCATGATGGGCAAACCGTTCCCCAG  
TGGTGGCCCTTTTCCAATGGGCATGTACAACCCCAACAC-----CTTC  
AGGCCATGTCTAATCTGGGGTGGGTTCATCCA-----CACTCGTCCCTG

ATGCCAGCTCCCTGTCTGCAGCTATGGGCATGGGCTGTCATATGGAATA  
TCTCATCTACGCCTCTTTTTTCATTCATGGGATGTTTACAAATCAGTGATG  
GATCAAACATTGTGAACCTGCTGGCGAGTAACTCTCCAAGTGTTTCATAC  
GCTCTGACCCAGCAGAAATACTTCAGYAACTACAGTCCTGTGATTGGGTT  
TTACATTTACGAGCCATTGAGTACTGGAACCTCACAGTGCAGGAGCACC  
TGAAGACTCTGAGTCACGGCTTCAACAAGATCTCCTGGATGGACAACCTTT  
TTCCACTACCTGAGGGTTGTGAATGTGAGTGCCTGACCAAGAGCGACTT  
CATCACTATCCTCAAGGGCTCCTTCCCTGCGCAGCCAGAGTACCAGCACT  
TCACTGAGGACATCATATTCTCCAAGA---ACCGTGACACAG-----AC  
GAATACGAAATTATCGCCTCACGCATGTATTTGGTGGCACGGACCACAGA  
GAAGAAACGTGAGGAGGTGGTGGAGCTTCTGGAGAAGCTTCGCCCGTTGA  
TGCTGATCAACAGCATCAAGTTCATTGCCTTCAATCCTACGTTTGTGTTT  
ATGGACCGCTACAGTTCCTCTGTCTCTCTCCCATCCTTACCTCAGGCTT  
CAGCGTGCTCACCATCCTCATCCTCACTTTTCTTCTGGTCATCAACCCCT  
TGGGGAACCTTCTGGCTCANCTCACGGTTACGTCCGTGGAGCTGGGCGTCT  
TGGGTTTGNNGGTTTTCACCATTTTGAATGGCAGCCAGCTCTCAAGAATGTG  
TCTACATCTTGCAATGTTGGCATTATTAATGGGCTCTCTGGATGGGCTTC  
CTCAGTGGATGACTCCCCAACTGACACCATCTGTTCGGCGGTTTCGCTATG  
ATGTGGCATTAGTGTGAGCGTTAAAGGATCTGGAGGAGGACATCATGGAG  
GGGCTGAGAGAAAAGTGGGATGGAGGACAGTGTGCTGCACCTCAGGCTTCAG  
TGTTATGATCAAGGAATCTTGTGATGGCATGGGCGATGTCAGTGAAAAGC  
ACGGTGGAGGACCAGCTGTTCTGAGAAGGCTGTACGTTTCTCTATTACT  
ATTATGAGTGTGTCTGTCTGGCAGATGATGAGGAG-----  
-----GAGGAGGTTACTATCTTCACGGAGCCAAAGCCAA  
ACTCAGAAGTGTCTGTAAAGCCCCCTTGCCTGATGTTTGTGGATGAATCA  
GACCATGAGACACTCACAGCTCTCCTGGGGCCGATAGTAGCAGAGCGTAA  
TGCAATGAAAGAGAGCAGGCTCATCCTTTCCATCGGCGGGCTGCCTCGCT  
CCTTCCGCTTCCACTTCAGAGGCACGGGATACGATGAGAAGATGGTGAGA  
GAGATGGAGGGCCTGGAAGCCTCAGGGTCCAGCTATGTCTGCACTCTGTG  
TGATTCAGCCGGCAGAGGCATCTCAAACATGGTGCTACACTCCATCA  
CCCGCAACCATGATGAGAACCTTGAACGTTATGAAATATGGAGAACCAAC  
CCCTTTTCTGAGTCTGGAGAAGAGCTGCGGGACAGAGTCAAAGGGGTCTC  
TGCCAAGCCCTTCATGGAGACCCACCCACGCTGGATGCATTACATTGTG  
ACATTGGCAATGCCACTGAGTCTACAAAATCTTCCAGGATGAAATGGG  
GAGGTGTTCCAAAAGGT---CAAT---CCCAGCCGGGAGGAACGGCGCAG  
CTGGAGGGCAGCCCTAGATAAACAGCTGAGGAAGAAGTTGAAGCTTAAAC  
CGGTAATGAGGATGAATGGTAACTACGCCCCGAGGCTAATGACCCAGGAG  
GCTGCAGAGGTGGTGTGTGAGCTGGTGCCTCAGAGGAGAGGAGGGAGGC  
CCTGAGGGAGCTTATGAGGCTATACCTACAGATGAAGCCTGTGTGGCGTG  
CCACCTGCCCAGCCAAGGAGTGCCCTGACCAGCTGTGCCGCTATAGCTTT  
AACTCCAGAGCTTTGCTGACCTCCTCTCCTCTACCTTCAAATATAGGTA  
CAATGGAAAGATAACCTAATTACATGCACAAGACCCCTGGCCCATGTCCCTG  
AAATCATAGAGAGAGATGGATCCATCGGAGCCTGGGCCAGTGAAGGGAAC  
GAGTCGGCAAACAAATCATAACCATCGAGATGGGTGCCGTGGGCCCCCA  
GTGGAAGGAGAGCCCACAACCTTTCTCCTGCTCCGTAGAAGACCCACAA  
AACAGACAAAGTTCAAAGGCATCAAGACGTACATTTTCGTACCGGGTCA  
CCGAGCCACACAGGGCGTCCCGTCTACAGGCGCTACAAACACTTTGACTG  
GCTGTACAACCGCCTACTGCACAAGTTCCTGTGATCTCCGTGCCCTCACC  
TGCTGAGAAGCAGGCCACGGGGCGATTTGAGGAAGACTTTATTGAGAAG  
CGGAAGAGACGACTGATACTGTGGATGAACCACATGACCAGTCAACCCTGT  
CCTCTCCCAGTATGAAGGCTTTGAGCACTTTCTGATGTGTGCTGACGACA  
AGCAATGGAAAGCTGGGCAAGAGACGAGCTGAGAAGGACGAGATGGTGGGC  
GCCCATTTTCATGCTGACCCTCCAGATCCCTAACGAGCACCAGGACCTTCA

GGATGTAGAGGAGAGAGTCGACACCTTCAAGGCCTTTGCTAAGAAAATGG  
ACGACAGCGTCATGCAGCTCACACACGTTGCCTCGGAGCTGGTGCCTAAG  
CACCTGGGTGGATTTCAGGAAGGAGTTCCAGCGGCTGGGAAATGCCTTCCA  
GTCGATTAGCCAGGCATTCATGCTGGACCCTCCCATAGCTCAGATGCC  
TCAACAACGCCATCTCCCATNNNNNNNNNNNGTTCCCAAACCTGACCTCTCTGGGTTTCAT  
CATTGGAGTCGGTGTGGTTGGAAACCTCCTGATCTCCATCCTGCTGGTCA  
AAGACAAGAGCCTGCACCGAGCACCTACTATTTCCCTGCTGGACCTTTGC  
GCCTCCGATATCCTCCGCTCCGCCATCTGCTTCCCCTTTGTCTTCACCTC  
GGTCAAGAATGGATCTGCCTGGACCTATGGCACGYTGACCTGCAAAGTGA  
TCGCCTTCCCTGGGTGTGCTCTCCTGTTTCCACACGGCGTTCATGCTATTC  
TGCGTGAGCGTCAACCGCTACCTGGCCATCGCACATCACCGTTTCTACAC  
CAAGAGGCTGACCTTCTGGACCTGTCTGGCTGTCTGCATGGTGTGGA  
CGTTGTCACTGGCTATGGCGTTCCCGCCGGTGTAGACGTAGGGACATAC  
TCTTTTATCCGGGAGGAGGACCAGTGCACATTCAGCACCGCTCCTTCAG  
GGCGAATGATTCGCTGGGCTTCATGCTCCTGCTGGCTCTCATTCTCCTGG  
CCACACAGCTGGTTTACCTCAAGCTCATCTTCTTCGTCCACGACCGCCGA  
AAGATGAAGCCTGTCCAGTTCGTGCCTGCTGTGTCAGCCAGAAGTGGACCTT  
CCACGGGCCAGGCGCCAGCGGGCAGGCGGGCCAACTGGCTGGCTGGAT  
TTGGTAGAGGCCCCACCCCGCTACTTTGCTGGGAATCCGGCAGAACAGC  
AACGCAGCGGGCCGAGGCGTCTACTGGTATTGGATGAATTCAAAACAGA  
GAAGAGGATTAGTAGGATGTTCTACATCATGACGTTTTTCTTCTGGCAC  
TGTGGGGGCCCTATCTGGTAGCCTGCTACTGGCGGGTGTGTTGCAAGGGGC  
CCTGTAGTCCCTGGGGGCTACCTGACGGCAGCTGTGTGGATGAGCTTTGC  
CCAGGCTGGGGTCAATCCTTTTCATCTNNNNNNNNNNNNNNNNNNNGCCAAATCTCGCTTTCACCCTGGC  
GTGGGGACTGGTCCCTGGCACGGAGC---GCAGCGTCCCCTCGGCAACAG  
CTTGCTATCCCCGAGCAAACCGAGGAGCCAGTGTGCCACCCCCCGC  
AGCGATGGTTTTGTCACCC---CTGCCAACAACCGACTGGACTTTGCTGCC  
TCGGCATAACGACGCCGCT-----GATTTCCCGGTAACGCGGCCAC  
CTTGCTGTCTTACGCAGCGGCCGGAGTGAAAGCTC-----TTCCCCTGC  
CGACTGCAGGCTGCTCCAACCGCCTCTTGCTATTACGCAGACCCGTCA  
G---GCTGG---GGAGGACGCACGCCCGCCGAGTACTGTGGCGTGAATAG  
CAAATCCAGCTCGGTGTTTTCTGCTGGCCCGCTAACTCTATCAGCGGCA  
GAGCGGGGA---GC---AACTACCTGG-----CCGAGGA---GGGA  
---GACTC---CATCACGACGGAGAGGTCACCC---AT---C---GGCTC  
TGAGGAG---ACCAAACCAAAGACATGAC---ATCAGA---GTCGAGCT  
GGATAGAG---ACGCCGTCTCCATTAAGTCCATCGATTTCGAGCGATTCT  
GGTATCTTTG---AACAGGCCAAGAGGAGAAGGATCTCACCTTCTGCCAC  
GCCG-----GTTTCAGAGACAGTGTCCCCGTAAAATNNNNNCATCACTCA  
ACAGGCCAAGTCACAGAGAGAGAAGTGGCGTTGGGGATAAATCCGTTTCGC  
GGATGGGATGGGCGCCTTCAAATAAACCACAGCTCCCACGATATTGGCT  
CCGG---ACAGACGGCGTTTTCTCCAGGCA---CCCGGCTAC---GCA  
GCAGCCGCCCTGGGA---CACCACCA-----CCACCCGACCCACGTTGG  
CTCT---TACTCCACGGCGGCTTTCAACTCCACAAGGGACTTTCTCTTCA  
GAAATCGGGGTTTTCGGGGACGCCACCGG-----GGCTCAGCAC  
AGTTTGTTCGCCTC-----CGGAAGTTT---C-----GCAGGGCC  
ACATGGACACTCAGATGCAGCGGGGCACCTGCTCTCCCAGGGCTCCACG  
AG---CAAGCGGCAGCCATGCGTCTTCCAACGTGGTCAACAGCCAGATG  
CGGTTGGGCTTCTCGGGGACATGTACGGACGGGCCGACCAGTACGGTCA  
CGTTACAAGCCCGCGGT---CCGACCACTATGCCTCGACCCAGCTGCACG  
GCTACGGCCCCATGAACATGAATATGGCCGCA---CACCACGGAGCAGGG  
GCCTTCTTTCGATACATGAGGCAGCCGATCAAACAAGAGCTCATCTGCAA  
GTGGGTCGAGCCGGAGCAGCTGACGAATCCCAAAAAGTCGTGCAACAAA  
CTTTTAGCACGATGCACGAGCTAGTGACCCATCTGACGGTGGAGCATGTG



GGGGGACCAGAGCAGACCAACCACATCTGCTTTTGGGAAGACTGTTCCAG  
AGAAGGAAAGCCATTCAAAGCCAAATACAAACTCGTAAATCATATCAGAG  
TACACACCGGTGAAAAACCCCTTTCGGTGTCCGTTCCCGGCTGTGGCAA

>Saurida tumbil

AGCCTCTTAATTTCGTGCCGAACCTCAGCCAACCGGGGGCTCTTCTCGGAGA  
CGATCAGATCTACAATGTAATCGTCACCGCACATGCCTTCGTTATAATTT  
TCTTTATAGTAATGCCAATCATGATCGGTGGGTTTGGAAACTGACTTATC  
CCCCTTATAATTGGCGCCCCGATATGGCATTTCCTCGCATGAATAATAT  
AAGCTTCTGACTTCTCCCCCTCTTTCCTCCTGCTTCTCGCCTCCTCTG  
GGGTAGAGGCTGGGGCTGGAACCTGGGTGGACAGTTTACCCTCCCCTGGCA  
GGTAATCTCGCCCATGCCGGCGCATCCGTTGACTTAACCATCTTCTCTCT  
ACACTTAGCAGGGATCTCTTCTATCCTGGGGGCTATTAATTTTATTACTA  
CAATTATTAATATAAAAACCCCCGCCATCTCACAATATCAAACCCCCCTA  
TTTGTATGAGCAGTCCCTTATTACTGCCGTTCTTCTCCTCCTTTCCCTTCC  
TGTTCTTGCGGCCCGGAATTACTATACTCCTCACGGATCGAAATCTCAACA  
CCACCTTCTTCGACCCCGCAGGAGGGGGGACCCAATTCTTTATCAACAT  
CTATTTTGATTCTTCGGCCACCCCGAAGTCTACATTCTCATCCTCCCGGG  
GTTTCGGAATAATCTCTCACATTGTTGCCATTATATGCAGGTAAGAAAGAAC  
CTTTTCGGATACATGGGGATGGTCTGAGCTATGATGGCAATTGGTCTCTTA  
GGTTTCATTGTCTGAGCTCACCACATGTTTACNNNNNNNNNNNNNNNNNNNNNNNNNNNNNTTCCTAGA  
GAGGAACCTG

CACCCCTCCAACCTGYCTCGGCATGTTGCTGCTGTCRGACGCYCAACAGTG  
CACAAAGCTGTGAGAGCTGTCMTGGGTATGTGCCCTCAGCAATTTTCCCG  
CCATCTGCAAGACGGAGGACTTCCCTCAGCTGCCCAAAGACATGGTCGTG  
CAGCTTCTGTCTCACGAAGAGCTRGAGACGGAAGATGAGAGGCTGGTTTA  
TGAGGCCGCCCTCAGCTGGGTCAACTATGACCTGGAGAGGAGACACTGCC  
ACCTGCCAGAACTGCTGAGAACCGTGCCTTAGCCTTGCTCCCTGCCATC  
TTCCCTCATGGAGAACGTCTCCACAGAGGAGCTGATCAACGCCAGGCCAA  
GAGCAAGGAGCTGGTAGACGAGGCCATCCGCTGCAAGCTGAAGATCCTGC  
AGAACGATGGAGTGGTCAACAGCCCCGTGCCCCGGCCTAGAAAAACCAGC  
CACGCCCTCTTCTGCTGGGAGGGCAGACCTTCATGTGTGACAAGCTGTA  
CTTGGTGGACCAAAGGCCAAAGAGATCATCCCCAAGGCCGACATCCCCA  
GCCCCAGGAAGGAGTTCAGTGTGTTGTCATCGGCTGTAAGGTGTACGTG  
ACAGGTGGGC--CGGCTC-AGAGAACGGGGTGTCTAAAGAYGTGTGGGT  
CTACGACACCGTCCATGAGGAGTGGTCCAAGGCAGCACCYATGCTGATCG  
CCAGGTTTGGCCACGGCTCTGCCGAGCTCAAACACTGCCTYTACGTGGTG  
GGAGGGCACACAGCGGCCACTGGCTGCCCTCCAGCCTCGCCCTCTGGATG  
AGTACATTGTTGTGTTTAGTCGTTCTACCACAAGGCTGATTCTAAACGAA  
GCAGAGGTGATCCTTGGCTGGCTCAAGAGTTTCAAATGAGAGTGGTTAC  
GGTGTCTTGGAGGAGCAAGCCTTCCCAGCATTATCCAGGTGATCAGTG  
GTGCCCTCCATGTTAGTTAGTATGCATGGAGCTCAGCTCGTCACATCTCTC  
TTTCTCCCTAGAGGAGCTGCTGTGGTGGAGCTTTTCCCTATGCTGTGAA  
CCCAGAACAGTACACCCATAAAAACCCCTCGCCTCCCTGCCAGGCATGG  
ACCTTCAGTACGTTTCTGGAGGAACATGGTTGAAGAGAACACTGTGGCC  
CACCCCGAAAGACCGTGGGACCAAGGAGGCATTGCCCACTTAGACAAGGA  
AGAACAAGAGCGAATCCTAGCCAGCAAGGATGTCCCAGGCACCTGTGCT  
GCCGCAACCCCGAGTGGCTTTTTAGGATTTACCAGGATACTCTGGTGGAC  
ATCCCGTCTTTCATGGAAGTCTTAA---GGAGGGTCTGAAA---ACAAG  
ACCGAGCTTGAAGAA---GTCCAAGCCGGCCAGCACAGTTCACCCGGGAC  
GCGTTAGAGAACCTCAGTGCCAGACATCAGTCCAAGCCACTATCGAGGCT  
AAGCTCACAGTGTCTGGCAGATCCCATGGAACCTTAAGTACCTAAAGGT  
GCGAGA-----AAAAAGGATCCCAGCAAGG

GAACCCTGGAGGATCAAATCATTCAGGCAAACCCTGCACTGGAAGCTTTT  
GGTAATGCCAAAACAGTGAGGAATGATAATTCCTCCCCTTTGGGAAATT  
CATTCGAATTCACCTTGGAACGAGTGGGAAGCTGTCCTCTGCAGACATTG  
AAACGTACCTGTTGGAGAAATCCCGGGTCACCTTTCAGCTTAAGGCAGAG  
CGGAATTATCATATCTTCTTCCAGATCTTATCCAACCATAAGCCAGAGCT  
GTTGGACATGCTGTTGATCACCAACAACCCTTATGACTACTCATTCATCT  
CCCAAGGAGAGGTGACAGTAGCATCCATCAACGATTCGGAGGAGCTGATG  
GCCACTGACAGTGCATTCGATGTGCTCGGCTTCACTCTAGAAGAGAAGCT  
GGGAGTCTACAAGCTGACAGGGGCTATCATGCACTATGGGAACATGAAGT  
TCAAGCAAAGCAACGCGAGGAACAGGCTGAGCCTGATGGTACAGAGGCT  
GCTGATAAGTCAGCTTACCTAATGGGGCTGAACTCAGCTGACCTCATTA  
AGGACTCTGTCATCCGAGAGTAAAGGTAGGAAATGAGTATGTAACTAAAG  
GTCAGGGTGTTCGATCAAGTCTACTAC-----

-----  
-----  
-----  
-----  
-----  
-----  
-----  
-----  
-----  
-----  
-----  
-----  
-----  
-----  
-----  
-----

-----TATCTCAT  
CTACGCCTCCTTCTCCTTCATGGGATGTTTACAGATCAGCGACGGGTCGA  
ACATTGTCAACCTGCTGGCCAGCAACTCCCCGAGCGTCTCGTATGCGCTC  
ACGCAGCAGAAGTACTTCAGCAACTACAGCCCCGTATCGGGTTCATACAT  
CTACGAGCCCATCGAGTACTGGAACCTCGACGGTGCAGGAGCACCTGAAGA  
CGCTGAGCCACGGCTTCAACAAGATCTCATGGATGGACAACCTTCTCCAG  
TACCTGCGGGTGGCGAACGTGAGCGCGGCCACCAAGGCCGACTTCGTCAC  
CATCCTCCGGGGCTCCTTCTCGGGAGCCCTGAGTACCAGCACTTCACCG  
AGGACATCATCTTCTCCAAGA---ACCGCGAGAGCG----ACGAGTAT  
GACGTCATCGCCTCGCGCATGTACCTGGTGGCGCGACCACGGAGAAAAA  
ACGCGAGGAGGTGGTGGAGCTCCTGGAGAAGCTGCGGCCGTTGATGCTCA  
TCAACAGCATCAAGTTCATCGCCTCAACCCACCTTCGTCTTCATGGAC  
CGTTACAGCTCCTCCGTGCTCTCGCCATCCTCACCTCCGGCTTCAGCGT  
GCTCACCGTCTCATCCTCACCTTCTCCTCGTCATCAACCCGCTGGGGA  
ACTTCTGGCTCATCCTGACGGTCACGTCGTGGAGCTGGGCGTCTGGGC  
CTGATGNNNNNNNNNNNNNNNNNNNNNNNNNNNNNNNNNNNNNNNNNNNN

NNNNNNNTGGGCTCTCTGGATGGGCTACATCTGTGGAGGACTCTCCGGCCG  
ACACCATAAACCCTGCTTTCGCTATGATGTGGCCCTGGTCTCAGCCCTG  
AAAGACTTAGAGGAGGACATCATGACAGGGCTGAAAGAGCGTGAGCTGGA  
AGACAGTGCATGCACCTTGGGCTTCAATGTTATGATCAAGGAATCCTGTG  
ATGGCATGGGAGATGTCAGCGAGAAGCATGGTGGAGGGCCAGTGATCCCT  
GAGAAGGCTGTTTCGTTTCTTTCACCGTCATGTTCGATCTCTGTCCAGCC  
AGAGGGAGAGAAC-----GAAGAAG  
TCGTTATCTTACGGGAGACAAAGCCCAACTCTGAGCTGTCCTGTAAGCCG  
CTATGCCTGATATTTGTGGATGAGTCTGACCATGAGACTGACTGCTGT  
GTTAGGGCCTGTGGTAGCAGAGAGGGATGCAATGAAGGACAGCCGGCTCA  
TCCTCTCGCTGGGCGGCCTCCCCGCTCTTCCGGTTCAGCTTCAGAGGG  
ACAGGCTACGACGAAAAGAAGGTGCGGAAGATGGAGGGCCGGGAGGCCTC





AAGCTATCCGTTGTAAGCTGAAGATCCTACAGAACGATGGTGTGCTTAAAC  
AGCCCATGTGCTCGTCCAAGAAAAACCAGCCATGCCCTCTTTCTTCTGGG  
CGGGCAAACCTTTCATGTGTGATAAATTTGTACCTGGTGGACCAGAAAGCCA  
AAGAGATCATCCCCAAGGCTGACATTTCCAGCCCCAGGAAGGAGTTCAGY  
GCCTGTGCCATCGGCTGTAAGGTGTACATCACTGGCGGGA--GAGGCTC-  
AKAAAAATGGYGTGTCCAAAGATGTTTGGGTCTATGACACCGTCCACGAGG  
AATGGTGAAGGCAGCACCCATGCTTATTGCCAGGTTTGGCCATGGCTCT  
GCAGAGCTGAAACACTGCCTCTACATGGTAGGAGGTCACACCGCATCGAC  
TGGCTGCCTTCCGGCCTCTCCATCTGGAGGAATACATTTGTTGTGTTTAGC  
CGCTCAACAACGAGGCTGATACTGAATGAAGCTGAGCTAATCATGACACT  
GGCCAGGAGTTCCAGATGAAAGTAGTCACAGTATCCCTTGAGGAACAGT  
CTTTCCCCAGTATTGTGCAGGTAATCAGTGGTGTGCCATGTTAGTCAGT  
ATGCATGGAGCTCAGCTTATCACCTCATTGTTCCCTCCCCAGAGGAGCCAC  
TGTGGTGGAGCTGTTCCCTTTTGTGTGAACCCAGAGCAGTACACCCCAT  
ACAAAACCCTTGCTTCCCTTCCAGGCATGGACCTTCACTATATCTCTTGG  
AGGAACACTAAGGAGGAAAAACACCATCATTACCCAGACAGACCCCTGGGA  
ACAAGGGGGTATCGCTCACTTGGATAAGGAGGAGCAAGAGCGAATACTGG  
CAAGCAAAGATGTCCCCAGGCACCTGTGCTGCCGCAACCCAGAGTGGCTT  
TTCCGTATCTACCAGGATACTTTGGTAGACATCCCTTCCTTTTTGGAAAGT  
CATCAA---AGAGGGCATGAAG---ACAAAGCCAGCTTGAAGAA---GT  
CAAAGCCGGCCAGCACACTACACCCGGGCCGAGTCAGAGAACCCAGTGT  
CAGACCTCAGTACAAACCACAAATGAGGCTAAACTTACAGTCTCCTGGCA  
GATCCCGTGGAATCTGAAATACCTGAAGGTGAGAGGTCAAATACGANNNNNNNNNNNAA  
AAAGGACACCAGCAAGGGTACATTGGAGGATCAAATCATCCAGGCAAACC  
CAGCGTTGGAAGCCTTCGGCAACGCCAAAACACTGAGAAATGACAATTCA  
TCGCGTTTTTGGAAAAATTCATCCGAATTCACCTTTGGCACAAGTGGCAAGCT  
GTCATCTGCTGACATTGAGACATACTGCTGGAGAAGTCACGCGTCACCT  
TTCAGCTCAAGGCTGAGAGAAATTACCACATCTTCTATCAGATCCTGTCC  
AACCAGAAGCCAGAACTGTTGGACATGCTGCTGATCACTAACAACCCATA  
CGACTACTCCTACATCTCCCAAGGAGAGGTATCAGTCGCCTCCATCAATG  
ACTCAGAGGAGCTGATAGCCACTGACAGTGTCTTTGATGTGCTCGGCTTC  
ACTCCAGAAGAGAAGATGGGAGTCTATAAACTGACGGGGGCCATCATGCA  
CTATGGCAACATGAAGTTCAAACAGAAGCAGCGTGAGGAACAGGCTGAGC  
CGGATGGGACTGAGGCTGCTGATAAATCAGCATACTAATGGGGCTAAAC  
TCTGCTGACCTCATCAAAGGGCTATGCCATCCCAGAGTCAAAGTAGGAAA  
TGAATATGTCACGAAAGGCCAAAGTGTGGACCAAGTCTACTACCCCAACA  
AGGAGGCCCTTCAAGTGTGAGGAGTGTGGGAAGCACTACAACACCAAGCTA  
GGATATAAGCGCCATGTGGCCATGCACTCTGCCACGGCAGGTGATCTCAC  
CTGCAAAGTCTGCATGCAGACCTACGAAAGCACGCCCGTGTCTTAGAGC  
ACCTGAAGAGCCACTCCGGAAAGTCTTCAGGTGGTACCAAGGAGAAAAA  
CACCCGTGCGATCACTGTGACCGGCGTTTCTACACACGGAAGGATGTGAG  
ACGGCACATGGTGGTCCACACTGGCCGAAAGGACTTCCTGTGCCAGTACT  
GTGCTCAGCGTTTTTGGCAGGAAGGACCATCTGACACGTCATGTGAAGAAG  
AGCCACTCACAGGAGCTGCTGAAAATCAAGACGGAGCCTCCTGATATGTT  
AGGCTTTTTAGCTTCCGGGTACCACCTTGTCTGTGAAGGAGGAGCTCA  
GCCCCATGATGTGTGGCATGGGTCCCAACAAAGACCCCATGATGGGCAA  
CCGTCCCCAGTGGGGCACCTTTTCCAATGAGCATGTACAACCCCCACCA  
T-----CTCCAGGCCATGTCTAATCTGGTGTGGGCCACCCA-----C  
ACCCATCCCTGATGCCAGTTCCCTTGTCTGCAGCTATGGGAATGGGCTGT  
CACATGGAATATCTCATCTATGCCCTTTTCTCATTCATGGGATGTTTACA  
AATTAGTGATGGATCAAATATCGTGAACCTGCTGGCTAGTAACTCTCCAA  
GTGTTTCRTATGCTTTGACACAGCAAAAATACTTACAGTAACTACAGTCTCCT  
GTGATTGGGTTTTACATCTATGAGCCATTGAATACTGGAACCAACGGT

GCAGGAACACCTGAAGACTCTGAGTCATGGCTTCAACAAGATCTCCTGGA  
TGGACAACCTTTTTCCACTACCTGCGAGTGGTGAATGTGAGTGGTCAACC  
AAGAGTGACTTCATCACCATACTCAAGAGCTCCTTCCTACGCAGCCCGGA  
GTAYCAGCACTTCACTGAGGACATCATATTCTCAAAA---ACCGTGAGA  
CTG-----ACGAGTACGACATTATTGCATCGCGGATGTACCTGGTGGCA  
CGGACAACAGAGAAGAAGCGCGAGGAGGTGGTGGAGCTTCTGGAAAAGCT  
GCGTCCGTTGATGCTGATYAACAGCATCAAATTCATTGCCTTCAATCCTA  
CATTTGTGTTTCATGGACCGCTACAGCTCCTCTGTCATCTCTCCCATCCTG  
ACCTCAGGATTCAGCGTACTCACAATCCTCATCCTCACTTTCTTCCCTGGT  
CATCAACCCCTTGGGTAACCTTCTGGCTCATCCTCACTGTTACATCTGTGG  
AGCTGGGTGTCTTGGGTTTGGATGGGGTTTACCAGTTTGAATGGCAGCCA  
GCTCTTAAGAATGTTTCTACATCTTGCAATGTTGGCATTATTAATGGGCT  
CTCTGGATGGGCTTCTCAGTGGATGACTCCCCAGCTGACACCATCACTC  
GGCGGTTTTCGCTATGATGTGGCACTGGTGTGAGCATTAAGGATCTGGAG  
GAGGACATCATGGAGGGGCTGAGAGAGAGAGGGATGGAAGACAGTACTTG  
CACCTCAGGCTTCACTGTCATGATCAAGGAATCTTGTGATGGCATGGGCG  
ATGTCAGCGAGAAGCATGGTGGAGGACCAGCTGTTCCCTGAGAAGGCTGTA  
CGTTTCTCTGTACCATTATGTCTATCTCTGTCTTGGCGACCGATAGGGA  
G-----GAAGAGGTTACCATCTTCA  
GAGAGCCAAAGCCAAACTCAGAACTGTCTTGTAAAGCCTCTTTGCCTGATG  
TTTGTGGATGAGTCAGACCATGAGACACTCACAGCCATCCTGTGGCCTAT  
AATTGCAGAGCGTAATGCAATGAAAGAGAGCAGGCTCATCCTATCCATTG  
GTGGACTACCTCGCTCCTTCCGTTTCACTTCAGAGGCACAGGATATGAT  
GAGAAGATGGTGCCTGAGATGGAGGGCCTTGAAGCTTCAGGATCCACCTA  
TATCTGCACTCTTTGTGATTCCAGTCGGGCAGAGGCCTCTGAAAACATGG  
TCCTTCACGCAGTTACCCGCAGCCATGAAGAGAACCTAGAACGTTATGAA  
ATATGGAGAACCAACCCCTTTTCTGAGTCAGTAGATGAGCTGCGAGACAG  
AGTCAAAGGGGTCTCTGCCAAGCCCTTTATGGAGACCATCCCACCCTGG  
ATGCATTGCACTGTGACATAGGCAATGCCACTGAGTTCTACAAAATTTTC  
CAGGATGAGATTGGGGAGATGTACCAGAAGGT---CAAT---CCGAGTCG  
AGAGGAGCGGCGCAGCTGGAGAGCAGCCCTAGATAAACAGCTGAGGAAGA  
AGATGAAGCTCAAACCCATAATGAGGATGAATGGGAACATGCCCCGCAAG  
CTAATGACCATGGAGGCTGTGGAGGTGGTGTGTGAGTTGGTGCCCTCAGA  
GGAGAGGAGGGAGGCTCTGAGGGAGCTTATGAGACTCTACCTCCAGATGA  
AGCCTGTGTGGCGAGCCACTTGCCAGCCAAGGAGTGCCCTGACGAGCTA  
TGTCGCTACAGTTTAAATCCCAGCGCTTTGCTGACATCCTCTCCTCTAC  
CTTCAAATATAGGTACAATGGAAAAATAACAAATTACCTGCACAAGACCC  
TGGCCCATGTGCCTGAAATCATAGAGAGAGATGGATCGATAGGAGCATGG  
GCTAGCGAGGGAAACGAGTCGGCAAACAATCTTACACCATCGAGATGGG  
TCCCTTGGGGCCTCGATGGAAGGAGAGCCACAGCCTTTCACCTGCTCCA  
TTGAAGACCCACAAAACAGACAAAAGTTCAAGGGCATCAAGACGTACATT  
TCGTACCGAGTCACGCCGAGNNNNNNNNNNNNNNNNNNNNNNNNNNNNNNNNNTGT  
ACAACCGCATACTGCACAAGTTCATG  
TGATCTCCGTGCCTCACCTGCCTGAGAAGCAGGCCACGGGGCGATTTGAG  
GAAGACTTCATTGAGAAGCGCAAGAGGCCACTAATACTGTGGATGAACCA  
CATGACCAGTCACCCGTCCTCTCCAGTATGAAGGCTTCGAGCACTTTC  
TGATGTGTGCTGATGACAAGCAGTGGAACTGGGCAAGAGGCGGGCGGAG  
AAGGACGAGATGGTGGGTGCCATTTTCATGCTGACCCTCCAGATCCCTAA  
CGAGCACCAGGACCTCAGGATGTTGAGGAGCGCATTGACTCCTTCAAGG  
CTTTTGCTAAGAAAATGGATGACAGTGTGATGCAGCTCACACATGTCGCC  
TCGGAGCTGGTGCCTAAGCACCTGGGTGGGTTTCAAGGAGGTTCCAGCG  
GCTGGGAAACTCCTTCCAGTCCATTAGTCAGGCATTCATGCTGGACCCTC  
CCCACAGCTCAGAGACCTTCAACAACGCCATCNNNNNNCCTTGGCCAGGTTCCCT

AAACTGACCTCTCTGGGTTTCATCATTTGGAGTCGGTGTGGTTGGAAACCT  
CCTGATCTCCATTCTGCTGGTCAAAGACAAGAGCCTCCACCGAGCGCCCT  
ACTATTTCCCTGCTGGACCTGTGCGCCTCTGATATCCTGCGCTCTGCCATC  
TGCTTCCCTTTTGTCTTTACCTCGGTCAAGAATGGATCTGCCTGGACCTA  
TGGCAGCTGACCTGCAAAGTATCGCCTTCTGGGTGTACTCTCTGT  
TTCACACAGCGTTTATGCTATTCTGTGTGTCAGTGTACGCGCTACCTGGCC  
ATCGCACATCACCGTTTCTACACCAAGAGGCTGACCTTCTGGACCTGTCT  
AGCTGTCATCTGCATGGTGTGGACGTTGTGTCAGTGGCTATGGCGTTCCTGC  
CTGTGCTAGACGTAGGGACGTAATCTTTTATCCGTGAGGAGGACCAGTGC  
ACATTCAGCACCCTCCTTTCAGGGCGAATGATTCAGTGGGCTTCATGCT  
CCTGCTGGCGCTCATCCTCCTGGCCACACAGCTGGTTTACCTCAAACCTCA  
TCTTCTTTGTCCACGACCGTTCGAAAGATGAAGCCTGTCCAGTTTCGTGCCT  
GCTGTCAGCCAGAATGGACCTTCCACGGGCCAGGTGCCAGTGGKCAGGC  
GGCGCAAATTGGTTGGCCGGATTTCGGACGAGGCCACCCACCTACTT  
TGTTGGGCATCCGGCAGAACAGCAACGCAGCGGGCCGAGGCGTCTACTT  
GTATTGGATGAATTCAAAACAGAGAAGAGGATTAGTAGGATGTTCTACAT  
CATGACGTTTTTCTTCCCTGGCACTGTGGGGGCCCTATCTGGTTGCCGTGCT  
ACTGGCGGGTGTGTTGCAAGGGGCCCTGTGGTCCCTGAGGGCTACCTGACA  
GCAGCCGTATGGATGAGCTTTGCCAGGCTGGGGTCAATCCTTTTCATCGC  
TCTTNNNNNNNNNNNNNNNGCCAAATCTCGCTTTCACCCTGGCATGGGGACTGGTCCTGGCACGG  
AGC---GCAGCGTCCCACTCGGCAACAGCTTGTATCCCCGCAGCAAAGC  
GAGGAGCCCCTGTTGCCACCCCCCGCAGCGATGGTTTGTACCC---C  
TGCCAACAACCGACTGGACTTTGCTGCCTCGGCATACGACGCGCT----  
-----GATTTGCGCCGTAACCGGCCACCTTGTGTCTTACGCAGCGGCC  
GGAGTGAAGGCTC-----TTCCCTGCCGACTGCAGGCTGCTCCAACCG  
GCCTCTTGGCTATTACGCAGACCCGTCGG---GCTGG---GGAGGACGCA  
CGCCCGCGCAGTACTGTGGTGTGAATAGCAAATCGAGCTCGGTCTTTTCC  
TGCTGGCCCGCTAACTCTATCGGTGGCAGAGCGGGCA---CC---ACTA  
CCTGT-----CTGAGGA---GGGA---GACTC---CATCCCGACAG  
AGAGGTCACCC---AT---CGGCGGCTCGGAGGAG---ACCAAACCCAAA  
GACATAAC---ATCAGA---GTCGAACTGGATAGAG---ACCCCGTCCTC  
CATTAAGTCCATCGATTTCGAGCGATCTGTTATCTTTG---AACARGCCA  
AAAGGAGAAGGATCTCACCTTCTGCCACGCCG-----GTGTCAGAG  
ACAGTGTCCCGCTAAAGTCTGAGCATCACTCAACAGGCGAAGTACAGA  
GAGAGAAGTGGCGTTGGGGATAAAATCCGTTTCGCGGATGGGATGGGCGCAT  
TTAAAATAAACCACAGCTCCACGATATTGGCTCCGG---ACAGACGGCG  
TTTTCTCCAGGCG---CCCGCTAC---GCAGCAGCCGCCCTGGGA--  
-CACCATCA-----TCACCCGACCCACGTTGGCTCT---TACTCCACGG  
CGGCTTTCAACTCCACCAGGGACTTCTCTTCAGAAATCGGGGATTCGGG  
GACGCCACAGG-----CGCGCAGCACAGTTTGTTCGCCTC---  
-----CGGAAGTTT---T-----GCAGGGCCACATGGACACTCAGATG  
CAGCGGGGCACCTGCTCTTCCCGGGGCTCCACGAG---CAAGCGGCGAGC  
CATGCGACTTCCAACGTGGTCAACAGCCAGATGCGGCTGGGCTTCTCGGG  
GGACATGTACGGACGGGCCGACCAGTACGGCCACGTTACAAGCCCGCGGT  
---CCGACCATTATGCTTCGACCCAGCTGCACGGCTACGGCCCCATGAAC  
ATGAATATGGCCGCA---CACCACGGAGCAGGGGCCCTTCTTTTCGATACAT  
GAGGCAGCCGATCAAACAAGAGCTCATCTGCAAGTGGGTGCGAGCCGGAGC  
AGCTGACGAATCCCAAAAAGTTCGTGCAACAAAATTTTAGCACGATGCAC  
GAGCTCGTGACCCATCTGACGGTGGAGCATGTGGGGGGACCGGAGCAGAC  
CAACCACATCTGCTTCTGGGAGGAATGTTTCGAGAGAAGGAAAGCCATTCA  
AAGCCAAATACAACTTGTAAATCATATCAGAGTACACACCGGAGAAAAG  
CCCTTCCCGTGTCCGTTTCCCGGCTGTGGCAA

>Scopelarchus michaelarsi

NNNNNNNNNNNNNNNNNNNNNNNNNNNNNNNNNNNNNNNNNNNNNNNNNNNNNNNNNNNNNAGATGACCAGATTTATAATGTCA  
TCGTCACCGCCACGCTTTCGTAATGA  
TTTTCTTTATAGTTATGCCTGTTATAATCGGCGGATTCGGGAACTGACTG  
ATCCCCTTAATGATCGGAGCCCCGATATAGCATTCACGAATAAATAA  
CATAAGCTTCTGACTGCTCCCTCCCTCTTTCTCCTCCTGGCTTCCT  
CTGCCGTAGAAGCAGGTGCCGGTACAGGATGGACTGTCTACCCGCTCTC  
TCTAGCAACCTAGCACACGCAGGGCCTCCGTTGACCTAACTATTTTTTC  
ACTTCATCTAGCGGAATTTCTTCAATTCTGGGGCAATCAACTTTATTA  
CAACAATCATTAACATAAAACCCCCGGCTATTACTCAGTACCAAACACCT  
CTGTTTCGTTTGGAGCTGTTTAAATTACAGCCGTGCTTCTCCTACTCTCCCT  
GCCTGTCCTAGCGGTGGAATTACAATACTGCTAACCGACCGAAACCTAA  
ATACAACCTTCTTCGACCCAGCAGGAGGGGGTGACCAATTCTGTACCAA  
CATCTCTTCTGATTTTTTCGGCCACCCAGAGGTCTACATTCTTATTCTCCC  
CGGCTTCGGAATGATTTCTCACATCGTCGCTTATTATTCTGGTAAAAAAG  
AACCTTTTGGTTATATGGGCATGGTCTGAGCAATGATAGCAATTGGCCTT  
CTCGGATTTATCGTTTGGAGCCCATCACATGTTTACAGTTGGGATAGACGT  
AGACACCCGTGCCTATTCCTGGAGAGGAACCTGCACCCGTCCAAGTGCCT  
CGGCATGCTGCTGCTGTCGGACGCCACCAGTGCACCAAGCTGTCGGAGC  
TGTCTGGGGTATGTGTCTCAGCAACTTCCCCGCCATCTGCAAGACGGAG  
GACTTCTCCAGCTGCCCAAAGACAKGGCGGTGCAACTCCTGTCCCACGA  
AGAGCTGGAGACGGAAGACGAGAGGCTGGTTTATGAGGCTGCCCTGAACT  
GGGTCAACTATGACCTGGAGAGGAGACTGCCACCTGCCAGAGCTGCTG  
AGAACCCTACGCTCGCCTTGCTTCCCGCCATCTTTCTCATGGAGAACGT  
GTCCACGGAGGAGCTGATCAACGCCCCAGGCGAAGAGCAAGGAGCTGGTGG  
ACGAGGCCATCCGCTGCAAGCTGAAGATCCTGCAGAACGACGGCGTGGTC  
AACAGTCCCTGTGCCCGGCCAGAAAGACCAGCCACGCCCTCTTCTGCT  
GGGAGGGCAGACCTTCATGTGCGACAAGCTGTACCTGGTGGACCAGAAGG  
CCAAAGAGATCATCCTCAAGGCGGACATCCCCAGCCCCAGGAAGGAGTTC  
AGCGCCTGCGCCATCGCTGCAAGGTCTACGTCACGGCGGTG--GCGG  
TC-CGAGAACC GCGAGTCTAAAGAC-TTCAAGTCCCCGCCACCGTCCCCG  
AGGAGTGGTCCCAGGCCCCCCCCCTACTCATCGCCCGGTTTCGGGCACCAA  
TCCGCCGAGCTCAAACACTGCCTTTACGTCGTCGCGGGACACACCGCCGC  
CCCA-----  
-----  
-----  
-----  
-----TAGTAGAGCTCTTCCCCTACGCTGTGAACCCAGAACAGTACACCC  
CATAAAAACCCTAGCCTCCCTACCGGGCATGGACCTTCAATATGTTTCC  
TGGAGGAACACCATTGAGGAGAACACTGTCGCCACCCGGACAGACCCTG  
GGACCAAGGGGGCATTGCCCATTTGGAGAAAGAAGAGCAGGAGAGAATCC  
TAGCCAGCAAGGATGTCCCAGGCACCTGTGCTGCCGCAACCCAGAGTGG  
CTCTCAGGATTTACCAGGACACTCTGGTAGACATCCCCTCCTTCTGGA  
AATCCTCAA--GGAGGGCCTGAAG--ATGAGGCCACCCTGAAGAA--  
-GTCTAAGCCGTCCAGCACGGTGCACCCAGGCCGGTTCAGAGAACCCAG  
TGCCAGACTTCGGTCCAAGCCACCAACGAGGCTAAACTCACAGTATCCTG  
GCAGATCCCCTGGAACCTTAAGTACCTGAAGGTGCGAGAGGGAAGT----  
-----AAAAGGATGCAAGCAAGGGAACCCTGGAGGATCAA  
ATCATCCAGGCAAACCTGCGCTGGAGGCTTTTGGTAATGCTAAAACATT  
GAGGAACGATAACTCCTCCCCTTTGGTAAATTCATCCGAATTCACTTTG  
GAACCAGTGGTAAACTGTCTCTGCGGACATTGAGACCTACCTGCTGGAG  
AAGTCACGGTGCACCTTTCAGCTTAAGGCAGAGAGGAACTACCACATCTT  
CTTCCAGATCCTGTCCAATGAAAAGCCAGAGCTGCTGGACATGCTGTTGA







-----  
-----  
-----  
-----  
-----  
-----  
-----  
-----AAAGAGAGGTGGCTTTG  
GGGATAAATCCGTTTCGCGGACGGGATGGGCGCCTTCAAATAAACCCACAG  
CTCTCATGACGTTGGCTCCGG---GCAAACGGCGTTTTCCTCCCAGGCG--  
--CCCGGCTAC---GCGGCGGCTGCCCTGGGA---CACCATCA-----C  
CACCCGACCCACGTTAGCTCC---TATTCCACCGCAGCTTTCAATTCCAC  
CCGGGACTTTTCTTTCAGAAACCGCGGCTTCGGAGACGCCACCAG-----  
-----CGCGCAGCACAGTTTGTTCGCCTCCGC---CGCGGGAAGTTT-  
--C-----GCAGGGCCACATGGACACTCAGATGCCGCGGGCCACCTGCT  
CTTCCCTGGGCTGCACGAG---CAAGCCGCGAGCCATGCCTCGTCTAACG  
TTGTAAACAGCCAGATGCGACTGGGCTTTTCTGGGGACATGTACGGGCGG  
GCCGACCAGTATGGCCACGTTACAAGCCCACGGT---CCGACCACTACGC  
TTGACCCAATTGCATGGCTATGGCCCTATGAACATGAATATGGCGGCT-  
--CACCACGGAGCCGGGGCCTTCTTTTCGGTACATGCGGCAGCCGATTAAA  
CAAGAGCTCATCTGCAAGTGGATCGAACCAGCAACTGACGAATCCCAA  
AAAGTCGTGCAACAGAACTTTTTCAGCACGATGCACGAGCTGGTGACCCATC  
TGACGGTGGAG-----  
-----  
-----  
-----

>Scopelengys tristis

AGCCTTCTCATTCGGGCCGAACCTCAGTCAACCAGGCGCCCTCTTAGGGGA  
CGACCAGATCTACAATGTAATCGTAACGGCCATGCCTTTGTAATAATTT  
TCTTTATAGTAATACCCATTATGATTGGGGGGTTTGGGAATTGACTAATT  
CCTCTCATGATCGGAGCCCCGACATAGCATTCCCCGAATAAATAACAT  
GAGCTTCTGGCTTCTCCCTCCCTCCTTCCTCCTGCTCCTAGCGTCCCTCCG  
GCGTAGAAGCCGGGGCCGGAACCGGCTGAACAGTCTATCCTCCCCTTGCA  
GGCAACCTCGCCCACGCTGGGGCCTCTGTTGACTTAACAATTTTTTCCCT  
GCATCTAGCAGGTATTTCTTCAATTTTAGGCGCAATCAACTTTATTACAA  
CTATCATTAAATATGAAGCCCCCGCAATTTCCCAATATCAAACCCCCTA  
TTTGTGTTGAGCCGTCCTAATTACAGCAGTCCCTTCTCCTTCTTCCCTGCC  
CGTCTGGCCGCCGGAATTACCATGCTCTTAACAGACCGAAACCTAAATA  
CCACCTTCTTCGACCCGGCTGGGGGAGGCGACCCCATCCTCTACCAACAC  
CTCTCTGATTTTTTGGTCAACCCTGAAGTTTNNNNNNNNNNNNNNNNNNNNNN  
NNNNNNNNNNNNNNNNNNNNNNNNNNNNNNNNNNNNNNNNNNNNNNNNNNNN  
NNNNNNNNNNNNNNNNNNNNNNNNNNNNNNNNNNNNNNNNNNNNNNNNNNNN  
NNTTCTAGAGAGGAATCTTC  
ACCCGTCCAACCTGCTTGGGCATGCTGTTGCTCTCGGATGCTCACCAATGT  
ACTAAGTTATCAGAGCTTCTTGGGGCATGTGCCTCAGCAACTTCCCCGC  
CATCTGCAAGACGGAGGACTTCCCTCAACTTCCGAAAGACATGGTGGTGC  
AGCTCTTGTCCCACGAAGAAGCTGGAAACGGAAGATGAGAGACTGGTTTAC  
GAAGCCGCCCTTAACTGGGTGAACTACGACCTGGAAAGGAGGCACTGTCA  
TCTGCCAGAGCTGCTGAGAACAGTCCGTCTGGCTCTGCTTCCCTGCCATCT  
TCCTCATGGAGAACGTTTCCACAGAGGAGTTGATCAATGCCCAGGCCAAA  
AGCAAAGAGCTTGTGGATGAGGCCATCCGCTGCAAACCTGAAGATCTTACA  
GAACGATGGTGTGGTTAACAGCCTTTGTGCCCGGCCAGGAAGACCAGCC  
ATGCTCTCTTCCCTGCTAGGAGGGCAAACCTTCATGTGTGACAAGTTGTAC  
CTGGTGGACCAGAAGGCCAAAGAGATAATCCCCAAGGCAGACATCCCCAG  
CCCCAGGAAGGAGTTCAGCGCCTGTGCCATCGGTTGTAAGGTTTACATCA

CCGGCGGGA--GGGGCTC-AGAGAACGGTGTGTCTAAAGACGTATGGGTC  
TACGACACCGTCCATGAGGAGTGGTCTAAGGCAGCGCCCATGCTTATTGC  
TAGGTTTGGCCACGGCTCAGCTGAATTGAAACACTGCCTCTACGTGGTGG  
GAGGTCACACTGCAGCTACNNNNNNNNNNNNNNNNNNNNNNNNNGGACGAGTACATTGTGGTGTTCAGTC  
GTTCG

ACGACGAGACTCATCTCAACGAAGCGGAACTGATTATGGCGCTGTACCA  
GGAGTTTCAGATGAGGGTGGTCACCGTGTCCCTTGAAGAGCAATCTTTCC  
CCAGTATAGTCCAGCTTATCAGTGGTGCCTCTATGCTGGTCAGTATGCAT  
GGGGCTCAGCTTGTACCTCACTTTTCCTCCCCAGAGGAGCTGTGGTGGT  
GGAGCTCTTTCCCTATGCCGTGAACCCGGAACAGTACACCCCATATAAAA  
CCCTCGCCTCCCTACCAGGGATGGACCTGCAGTATGTTTCCTGGAAGAAT  
ACGATGGAGGAAAACACTGTCAACCACCCAGATAGACCCTGGGACCAAGG  
AGGCATCGCCACCTGGAAAAGGACGAGCAAGAGCGAATCCTCACCAGCA  
AGGATGTCCTCGGCACCTGTGCTGCCACAACCCAGAATGGTTTTTCCGA  
ATCTACCAGGACACTCTGGTGGACATCCCTTCATTCCTGGAAGTTCTCAA  
---AGATGGCCTGAAG---ACCAGACCTAGCTTAAAAA---GGCCAAGC  
CAGCCAGCACAGTACATCCAGGCCGGGTCAGGGAAGCACAGTGTCAAACC  
TCGGTCCAAGCCACCAACGAAGCTAAACTCACGGTCTCCTGGCAGATCCC  
ATGGAACCTGAAATACCTGAAGGTGAGAGAGGTGAAGTACGAGGTGTGGA  
TCCAGAAGAAGGACACCAGTAAGGGAACCTTGGAGGATCAAATCATCCAG  
GCCAACCTGCGCTGGAGGCCTTTGGGAACGCCAAAACCATCAGGAATGA  
CAACTCATCCCGTTTTGGAAAATTCATCCGGATCCACTTCGGGACGAGCG  
GTAAGCTGTCTATCTGCTGACATCGAGACCTACCTGCTGGAGAAGTCACGT  
GTCACCTTTCAGCTCAAGTCCGAGAGGAACTACCACATCTTCTTCCAGAT  
TTTGTCCAATCATAAGCCGGAGCTGTTGGACATGCTGCTCATCACTAACA  
ACCCATACGACTACTCTACATCTCCCAAGGAGAGGTGACGGTAGCCTCC  
ATCAACGACTCAGAGGAGCTGATGGCCACAGACAGTGCCTTTGATGTGCT  
TGGTTTTCACTCAGGAGGAGAAGATGGGAGTCTATAAGCTGACTGGTGCCA  
TTATGCACTACGGCAACATGAAGTTTAAGCAGAAGCAGCGTGAGGAGCAG  
GCAGAGCCCCGACGGCAGCTGAGGCTGCTGATAAGTCAGCTTACCTAATGGG  
GCTGAACTCTGCTGACCTCATCAAAGGACTTTGCCATCCCAGAGTCAAGG  
TAGGAAATGAGTATGTCACCAAAGGCCAGGGTGTAGATTACATCTAGTAC

-----  
-----  
-----  
-----  
-----  
-----  
-----  
-----  
-----  
-----  
-----  
-----  
-----  
-----

-----TATCTCATCTACGCTTCCCTTCTCCTTCATGGGAT  
GTTTACAAATCAGCGACGGGTGAACGTCGTGAACCTGCTGGCGAGTAAC  
TCTCCGAGCGTGTGCTTCGCGCTCACCCAGCAGAAGTACTTCAGCAACTA  
CAGCCCTGTGATTGGGTTCTACATTTACGAACCCATCGAGTACTGGAACG  
CCACGGTGCAGGAGCACCTGAAGACACTGAGTCACGGCTTCAACAAGATC  
TCCTGGATGGACAACCTTCTTCCACTACCTGCGGGTGGTGAATGTGAGCGC  
GTCGACCAAGAACGACTTCATCACCATCCTCAAGGGCTCCTTCTTACACA  
GCCCCGAGTACCAGCACTTACCAGGACATCATCTTCTCCAAGA---AC



-----GCCAAAT  
CCCGCTTTCACCTGGCGTGGGACTGCTCCTGGCACGGACC---GCAGC  
GTCCCACTCAGCAACAGCTTGCTCTCTCCGCAACAACCGAAGAACCAC  
TGTAAG---CCTCCCCGCAGCGATGGTTTGTACCC---CTGCCAACACC  
GACTGGACTTTGCAGCCTCGGCATACGATGCCGCT-----GATTT  
GCCGGTAAACGCAGCCACATTGCTGTCCTACGCAGCGGCTGGAGTGAAGGC  
TC-----TTCCCCTGCCGACCGCAGGTTGCTCCAACAGATCTCTTGGGT  
ATTACGCGGACCCGTCAG---GCTGG---GGCGCACGCACGCCACCTCAG  
TACTGT-----AGCAAATCCAGCTCGGTCCCTTTCTTGCTGGCCCAC  
GAATTCAGTTGGAGGCCGAACAGGCA-----CTAACTACCTAG-----  
---CGGAGGA---TGGA---GACGC---CATCCCAACAGAGAGATCCCCA  
---AT---TAATGGCTCTGAGGAA---ACGAAAGCCAAGACTT-----  
GTCCGA---GTCTAGCTGGATAGAG---ACGCCATCTTCGATAAAGTCAA  
TTGATTCAAGTGATTCTGGAATCTTTG---AGCAAGCAAAGCGGAGAAGA  
ATTTACCGTCTGCCACACCA-----GTTACAGAAACTGTGTCCCC  
GTNNNNNNNNNNN-----ACAGGCGAAGTCAAGAAAGAGAAGTGGCGTTGGGGATA  
AATCCGTTTCAGACGGGATGGGCGCCTTCAAAAATAACCACAGCTCTCA  
CGACATCGGCTCCGG---ACAGCGGCCTTTCTCCAGGGC---CCCG  
GCTAC---GCAGCGGCCGCTCTGGGG---CACCATCA-----CCACCCG  
ACCCACGTTAGCTCG---TATTCCACGGCAGCGTTCAACTCCACCAGGGA  
CTTTCTGTTTCAGAAATCGGGGTTTCGGAGACGCCACCAG-----  
-CGCCAGCACAGTGTGTGCCTCCGC---CGCGGAAGTTT---T---  
---GCAGGGCCACATGGACACTCAGATGCCCGCGGCACCTGCTCTTCCC  
CGGGCTTCATGAA---CAAGCCGCAAGCCACGCGTCTCTAATGTTGTCA  
ACAGCCAGATGCGACTGGGCTTTTCGGGGGACATGTACGGACGGGCCGAC  
CAGTATGGCCACGTTACAAGCCCGAGGT---CCGACCACTATGCATCGAC  
CCAGTTGCATGGCTATGGCCCTATGAACATGAATATGGCCGCA---CATC  
ACGGAGCAGGGGCTTCTTTTCGATACATGAGGCAGCCGATCAAACAAGAG  
CTCATCTGCAAGTGGATCGAACCGGAGCAACTAACGAATCCCCAAAAGTC  
GTGCAACAAAACCTTTACGCACGATGCAKAGAGCTMGTCAACCCATCTGACCG  
AGGAGCATGTGGGGGGGCCAGAACAGTCAACCACATTTGCTTCTGGGAG  
GACTGCTCTCGAGAAGGGAAACCGTTCAAAGCCAAAATACAACTTGTGAA  
TCATATCAGAGTACACACCGGAGAAAACCGTTCCGTGTCCCTTCCCCG  
GCTGTGGCAA

>Scopelosaurus harryi

AGCCTTCTCATCCGGGCGGAGCTAAGCCAACCCGGAGCCCTTCTAGGAGA  
CGACCAGATCTATAATGTTATCGTACTGCCACGCTTTCGTAATAATCT  
TCTTTATAGTAATACCAATTATGATCGGTGGTTTCGGAACTGACTTATC

CCTCTAATGATCGGGGCCCCGACATAGCGTTCCCTCGAATGAATAACAT  
AAGCTTTTGACTACTACCCCTTCTTTCCTCTTACTTCTAGCCTCCTCTG  
CCGTAGAAGCGGGTGCTGGGACAGGATGAACTGTCTACCCCTCTTGCC  
AGCAACCTGGCACATGCCGGAGCTTCTGTAGACTTAACCATTTTCTCGCT  
CCACCTGGCTGGGATCTCCTCTATTTCTAGGGCCATCAACTTTATCACAA  
CAATTATTAATATGAAACCCCGCTATCACCCAGTATCAGACCCCTC  
TTCGTATGGGCGTCTTATTACTGCCGTCTTCTCTTACTCTCCCTCCC  
CGTCTGGGCGCAGGTATTACGATGCTTCTCACTGACCGAAACCTAAACA  
CTACCTTCTTTGACCAGCAGGAGGTGGAGACCCCATCCTTTACCAACAC  
CTATTTCTGATTCTTTGGCCACCCAGAAGTTTACATTTTAATTCTCCCGG  
CTTTGGCATGATTTCCCATATCGTAGCCTACTATTCAGGTAAAAAGAAC  
CCTTCGGCTACATGGGCATGGTCTGAGCCATGATAGCAATCGGCCTCCTC  
GGGTTTATCGTCTGAGCCACCACATGTTTACAGTCGGAATGGACGTAGA  
CACACGTGCTTATTCCCTTGAGAGGAACCTGCACCCATCCAAGTGCCTTGG  
TATGCTGCTACTGTCAGATGCCACCAGTGCACCAAGCTGTCAGAGCTGT  
CCTGGGGTATGTGCCCTCAGCAACTTCCCTGCCATCTGCAAGACGGAGGAC  
TTCTCCAGCTGCCCAAAGACATGGTGGTGCAGCTCCTGTCCCATGAAGA  
GCTGGAGACGGAAGATGAGCGACTGGTTTATGAGGCTGCCCTTAACTGGG  
TCAACTATGACCTGGAGAGGAGACACTGCCACCTATCAGAGCTGCTGAGA  
ACCGTACGCCTGGCCTTGCTTCCCGCCATCTTCCCTCATGGAGAACGTCTC  
CACAGAGGAGCTGATCAATGCCAGGCAAAGAGCAAGGAGTTGGTGGACG  
AGGCCATCCGCTGCAAGCTGAAGATCCTGCAGAACGACGGCGTGGTCAAC  
AGTCCCTGTGCGCGGCCAGAAAGACCAGCCACGCCCTTTTCTGCTGGG  
AGGGCAGACCTTCATGTGTGACAAGCTGTACTTGGTAGACCAGAAGGCCA  
AAGAGATCATCCCCAAGGCAGACATCCCAGTCCCAGGAAGGAGTTCAGC  
GCCTGTGCCATTGGCTGTAAGGTCTACGTACAGGCGGGA--GAGGCTC-  
AGAGAACGGCGTATCTAAAGACGTGTGGGTCTATGACACCGTCCACGAGG  
AGTGGTCCAAGGCAGCACCCATGCTCATTGCCAGTTTGGCCATGGCTCT  
GCTGAGCTCAAACACTGCCTCTATGTGGTTGGAGGACACACAGCAGCCAC  
TGGCTGCCTCCAGCCTCTCCGTCTGGATGAGTGCATTGTTGTGTTTCACT  
CGTTCAACAACAAGGCTGATTCTGAACGAAGCAGAGCTGATACTGGCACT  
GGCCCAAGAGTTTTCAGATGAGGGTGGTTACAGTGTCCCTGGAGGAACAGT  
CTTTCCCCAGCATAGTACAGGCCATCAGTGGGGCCTCCATGTTGGTTAGT  
ATGCATGGAGCTCAGCTCGTCACCTCACTCTTCCCTCCCTAGAGGAGCTGC  
TGTAAGTAGAGCTCTTCCCTATGCTGTGAATCCGGAACAGTACACCCCAT  
ACAAAACCCTAGCCTCCCTACCAGGCATGGACCTTCAATACGTTTCCTGG  
AGGAACACTATTGAGGAGAACACTGTCGCCACCCAGACAGACCCCTGGGA  
CCAAGGAGGCATTACCCATTTGGAGAAAGAAGAGCAGGAAAGAATCCTAG  
CCAGCAAGGATGTCCCTAGGCACCTATGCTGCCGCAACCCAGAGTGGCTC  
TTCAGGATCTACCAGGACACTATGGTAGACATCCCCTCCTTGCTGGAAGT  
CCTCAA---GGAGGGCCTGAAG---ACCAGGCCGAGCTTGAAGAA---GT  
CCAAGCCGGCCAGCACGGTTCACCCGGGCGGGTCCGAGAACCCAGTGC  
CAGACTTCAGTCCAAGCCACCAAAGAGCCTAAACTCACAGTATCCTGGCA  
GATCCCATGGAACCTTAAGTACCTGAAGGTGCGAGAGG-----  
-----AAAAAGGACACAAGCAAGGGAACCTTGGAGGATCAAATC  
ATTCAGGCAAACCCTGCACTGGAGGCTTTTGGTAATGCCAAAACAATAAG  
GAACGATAATTCTCCCGTTTTGGAAAATTCATCCGAATCCACTTTGGAA  
CCAGTGGTAAACTGTCTCTGCGGACATTGAGACCTACCTGCTGGAGAAG  
TCACGGGTACCTTTCAGCTTAAGCAAGAGAGGAACTACCACGTCTTCTT  
CCAGATCTTGTCCAATCAAAGCCAGAGCTGTTGGACATGCTGTTGATCA  
CCAACAACCCCTATGACTACTCCTACATCTCCCAAGGAGAAGTAACCGTG  
ACGTCCATCAATGATTCAGAGGAGCTGATGGCCACCGACAGTGCCTTTGA  
TGTGCTTGGCTTACGCAAGAGGAAAAGATGGGAATCTACAAGATGATAG

GGGCCATTATGCACTATGGCAACATGAGGTTCAAGCAAAGCAGCGTGAG  
GAACAGGCTGAGCCTGATGGTACAGAGGCTGCTGATAAGTCAGCTTATCT  
AATGGGGCTGAATTCAGCAGACCTAATCAAAGGACTCTGCCATCCCAGAG  
TCAAGGTAGGAAATGAGTACGTACCAAAGGCCAGGGTGTAGATCAAGTC  
TACTACCCCAACAAGGAGGCCTTCAAGTGTGATGAGTGTGGGAAGCACTA  
CAACACCAAGCTGGGATACAAGCGCCATGTGGCCATGCACTCCGCTACCG  
CCGGGGATTTAACCTGCAAGGTGTGCATGCAGAGTTACGAGAGCACGCCG  
GTTCTCTTGGAGCACCTCAAGAGCCACTCGGGAAAAGTCTTCGGGTGGTGC  
CAAAGAGAAAAAGCACCCCTTGTGACCACTGCGACCGACGTTTCTACACTC  
GGAAGGATGTGAGACGGCATATGGTGGTCCATACAGGCCGCAAGGACTTT  
CTCTGCCAGTACTGTGCCAACGGTTTGGCAGGAAGACCACCTGACACG  
GCATGTGAAGAAGAGCCACTCGCAGGAGCTCCTAAAGATCAAGACAGAGC  
CTCCAGATATGTTGGGCTTGCTAGCGTCAGGGTCCCCGCCATGCCCTGTC  
AAGGAAGAGCTCAGCCCCATGATGTGTGGCATGGGGCCCAACAAAGACCC  
GATGATGGGTAAGTCTTCCCCAGCGGTGCACCATTTCCCATGAGCATGT  
ACAACCCCCACCAT-----CTCCAGGCCATGTCCAATTCTGGGGTGGCT  
CACCCG-----CACCCCTCCCTGATGCCCAGTTCCCTGTCTGCAGCTAT  
GGGCATGGGCTGCCACATGGAATATCTCATCTACGCGTCCTTCTCCTTCA  
TGGGATGTTTACAAAATCAGCGACGGGTGCAACGTGGTGAACCTGCTGGCG  
AGTAACTCTCCGAGCGCCTCGTACGCCCTGACGCAGCAGAAGTACTTCAG  
CAACTACAGCCCCGTGATCGGGTCTACATCTACGAGCCCATCGAGTACT  
GGAACTCCACGGTGCAGGAGCACCTGAAGACGCTCAGCCACGGCTTCAAC  
AAGATCTCCTGGGTGGACAACCTTCGTCCACTACCTGCGGGCGGTGAACGT  
GAGCGCGTCGACCAAGGCCGACTTCATCGCCGTCTCAAGGGCTCCTTCC  
TGCGGAGCCCGGCGTACCAGCACTTACGGAGGACATCATCTTCTCCAAG  
A---CCCACGAGAACA-----ACGAGTACGACATCATCGCCTCGCGCAT  
GTACCTGGTGGCGCGCACCCACGGAGAAGCGGGCGGAGGACGTGGTGGAGC  
TGCTGGAGAAGCTCCGGCCGCTGATGCTGATCAACAGCATCAAGTTCATC  
GCCTTCAACCCACGTTTCGTCTTCATGGACCCTACAGCTCCTCGGTCAT  
CTCGCCCATCCTCACCTCGGGCTTCAGCGTGCTCACCATCCTCATCCTCA  
CCTTCTTCTGGTTCATCAACCCGCTGGGGAACCTGTGGCTCATCATGACG  
GTCACGTCCGTGGAGCTGGGCGTGCTGGGCCTGATGGGGTACCACACATT  
CGAGTGGCAGCCAGCCCTCAAGAAATGTGTCCCCATCCTGCCATGTGGGTA  
TCATTGATGGGCTTTCGGGTGGGCCCTCGGTGGATGACGTCCCTGCT  
GACACCATCACCCGTCGGTTCGGCTATGACGTGGCCCTTGTATCAGCCCT  
GAAGGACCTAGAGGAGGACATCATCGAAGGGCTGAGGGAGTGTGGGCTGG  
AAGACAGTGTTCACCTCAGGCTCAGTGTATGATCAAGGAATCCTGT  
GATGGCATGGGAGATGTCAGCGAGAAGCATGGTGGAGGGCCAATGATGCC  
TGAGAAGGCTGTGCGTTTCTCTATCACCATCATGTCTGTCTCTGTCCAGG  
CCGATGGAGATGAG-----GAGGTA  
GTTGTCATCTTCAGGGAGCCAAAGCCCAACTCTGAACTGTCCTGTAAGCC  
CCTGTGCCTGATGTTTGTGGATGAGTCTGACCACGAGACACTCACTGCTG  
TCCTGGGGCCTTTGGTAGCAGAGAGGAATGCGATGAAGCAGAGCCGACTC  
ATCCTCTCAGTGGGTGGCCTCCCCGCTCTTTCGGCTTCCACTTCAGAGG  
CACAGGCTATGATGAGAAGATGGTGCAGAGATGGAAGGCCTGGAGGCCT  
CAGGCTCCACCTATATCTGCACTCTTGTGACACCACTCGGGCAGAAGCC  
TCTCACAACATGGTGTCCACTCGGTACACGCAGCCACGATGAGAACCT  
GGAGCGCTACGAGATATGGAGGACCAACCCCTTCTCTGAGTCTGCCATGG  
AACTGCGAGATCGGGTCAAAGGGGTCTCTGCCAAACCATTTATTGAGACC  
CATCCGACTATGGATGCATTACATTTGTGACATAGGTAATGCCACTGAATT  
CTACAAAATCTTTCAGGATGAGATTTGGGGAGGTGTTCCGGAAGGC---CA  
AC---CCTAGCCGGGAGGAACGGCGCAGCTGGAGGGCAGCCCTTGATAAA  
CAGCTGAGGAAGAAGTTGAAGCTGAAACCAGTAATGCGGATGAATGGGAA





-----  
-----  
-----ACAGGCGAAGTCACGGAGCGAGAGGTGGCGTTGGGG  
ATAAACCCGTTTCGCGGACGGGATGGGCGCCTTCAAATAAACACAGCTC  
CCACGACATTGGCTCCGG--GCAGACGGCGTTCCTCCCAGGCG---C  
CCGGCTAC---GCGGCGGCCGCCCTGGGA---CACCACCA-----CCAC  
CCGACGCACGTACAGTCC---TACTCCACGGCGGCGTCAACTCCACGCG  
GGACTTCTCTTCCGCAACCGGGGCTTCGGGGACGCCACCAG-----  
----CGCGCAGCACAGTCTGTTCGCGTCCGC---CGCGGGAAGTTT---C  
-----GCGGGGCCACATGGGCACTCCGATGCCGCGGGCCACCTGCTCTT  
CCCCGGGCTGCACGAG--CAGGCGCGAGCCACGCGTTCGTCCAACGTCG  
TCAACAGCCAGATGCGACTGGGCTTTTCCGGGGACATGTACGGGCGGGCC  
GACCAGTATGGCCACGTACGAGCCCCCGGT---CCGACCACTACGCGTC  
GACCAGTTGCACGGCTACGGCCCTATGAACATGAATATGGCCGCT---C  
ACCACGGCGCGGGGGCCTTCTTTCGGTACATGCGGCAGCCGATCAAGCAG  
GAGCTGATCTGCAAGTGGATCGAGCCGGAGCAGCTGACGAACCCCAAGAA  
GTCGTGCAACAAAACTTTCAGCACCATGCACGAACCTCGTACCCACCTGA  
CGGTGGAGCATGTGGGAGGACCCGAGCAGTCGAACCACATTTTGTCTTG  
GAGGACTGTGCCCGGAGGGGAAAACCGTTCAAAGCCAAATACAACTTGT  
GAATCACATCAGGGTTCACACGGGGGAGAAACCGTTCCCGTGTCCGTTCC  
CCGCT-----

>*Searsia koefoedi*

AGCCTCCTAATTTCGAGCTGAACTAAGCCAGCCCCGGGGCCCTACTAGGCGA  
CGACCAAATTTATAATGTTATCGTCACGGCACATGCCTTCGTAATGATCT  
TCTTTATAGTAATACCGATCATGATCGGGGGCTTTGAAACTGGCTGCTC  
CCCTGATACTGGGGGCCCCCGACATAGCATTCCCCGAATAAATAACAT  
GAGCTTCTGACTCCTCCCTCCCTCCCTCCTCCTGTTGTGCTCCTCCG  
GGGTTGAAGCCGGGGCCGGAACAGGATGAACCGTTTATCCCCACTTGCC  
GGCAACCTTGCCACGTTCGGTGCCTCCTGTGGACCTGGCTATTTTCTCCCT  
CCACCTGGCGGGTGTCTCCTCAATCCTGGGGTCAATTAATTTTATTACCA  
CAATTATTAACATGAAGCCCCCGCCATCTCACAGTACCAAACACCTTTA  
TTTATCTGATCGGTCCTAGTCAACAACAGTCCTCCTCCTCTGTCACTCC  
GGTCTGGCCGCGAGGTATTACCATGCTCCTCACAGACCGAAACCTTAACA  
CAACATTTTTTGACCCGGCCGGAGGAGACCCCATCCTATAACCAACAC  
CTA-----

-----  
-----GGATGAGTACATCGTGGTTTTTCAGC  
CGCTCCGTCAACCGGCTCATCCTCAACGAGGCCGAGTTGATCCTGGCTCT  
GGCGCAAGAGTTCCAGATGAGGGCCGTCACGGTGTCCCTGGAGGAGCAGT  
CGTTCGCCAGCATCGTTCAGGCGATCAGCGGGGCGTCCATGCTGGTCAGC  
GTCCACGGAGCCCAGCTGATCAGCTCCCTGTTCCCTGCCGCGTGGCGCTGC  
CGTGGTGGAGCTCTTCCCCTACGCCATCAACCCGGAGCAGTACACTCCCT  
ACAAAACCCTGGCTCTGTTACCAGGCATGGACCTCCAGTACGTGGCTTGG  
AGGAACACCATGGAGCAGAACTCGGTGGCCTACCCCGAGCGTGCCTGGGA  
CCAGGGTGGCATCGCCACCTGGAGAAGGAGGAACAGGAGCGCATCCTGG  
CGAGCGACGAGGTGCCGCGGCACCTGTGCTGCCGCAACCCGGAGTGGCTC  
TTCCGGATTTACCAGGACACCCAGGTGGACGTCCCTCCTTGCTGGAGGT  
CCTCCG---AGAAAATCTGAAG---GCCAAGCCTAACCTGAGAAA---GG  
CCAAGGCAGCTAGTACAGTACACCCCGGTAGAGTCAGGGAGCCCAAGTGC  
CAGACCTCGGTCCAGGCCACCAACGAGGCCAAGCTGACAGTGTCTGGCA  
GATCCCCTGGAACCTCAAATACCTGAAGGTGAGGGAGGTCAAATATGAAG  
TATGGATACGGAAGAAGGATGCCAGCAAAGGGACCTTGGAGGATCAAATC  
ATTCAAGCTAACCCAGCACTGGAGGCTTTTGGCAATGCCAAAACAGTGAG  
AAATGACAACCTCCTCACGCTTTGGGAAGTTCATTCGTATTCATTTTGGAA  
CGAGCGGCAAACCTCCTCTGCTGACATAGAAACTTACTTGCTTGAGAAA  
TCCCCTGTGACCTTTCAGCTCAAATCGGAGAGGAACTACCACATCTTCTT  
TCAGATATTGTCCAATGAAAAGCCAGAGCTGCTGGACATGCTGTTGATTA  
CCAACAACCCTTATGATTATTGCTTCATCTCCCAAGGAGAAGTAACAGTT  
AAATCTATCAATGACAGTGAGGAGTTGCTTGCCACTGACAGTGCCTTTGA  
TGTGCTTGGCTTCACTCCAGAGGAGAAGATGGGGATCTATAAGTTGACAG  
GTGCCATTATGCACTATGGCAACATGAAGTTCAAGCAGAAGCAGCGTGAG  
GAGCAGGCAGAGCCTGATGGTACTGAGGCAGCTGACAAGTCAGCCTACCT  
GATGGGGCTTAACTCTGCTGATCTTGTGAAGGGACTCTGCCATCCCAGGG  
TCAAAGTCGGCAATGAGTATGTAACAAAGGGACAAGGTGTAGATCAAGTC  
TATTAC-----

-----  
-----TACCTGATTTACGCTTCCTTCTCGTTCA  
TGGGATGTTTACAAAATCAGCGACGGATCCAACATAGTCAACCTTTTGGCC  
AGCGACTCGCCGAGCGTGTGCTACGCTCTGACCCAGCAGAAGTATTTTCAG  
CAACTACAGCCCAGTGATAGGGTCTACATCTATGAGCCCATTGACTACT  
GGAACGCCACTGTGCAGGAGCACCTCAAGACACTGGGCCAGGGGTCAAT  
ACGATATCGTGGATCGATAATTACTTTCAGTATCTGAAGGTGACGAACGT  
CAGCGCGTGCACAAAAGCGACTTCATCGCCGTCCCTCAAGACCTCGTTCC  
TGAGGAGTCCCAGATATCAGCACTTCACGGACGACATCATCTTTTCCAAA  
A---CGGGGG-----ACGACTTCAACATCATCGCGTCCAGGAT  
GTACCTGGTGGCGCGGACCACGGAGAAGACCCGGGAGGAGGTGGTGGAGC  
TGCTGGAGAGGCTCCGCCCTCTCTCGCTCATCAACAGCATCAAGTTCATC





-----  
-----  
-----  
-----  
-----  
-----  
-----  
-----  
-----

-----TTCTAGAGAGAAACCTTCACCCGTCTAACTGCCTTGG  
CATGCTGTTGCTGCTGACGCCACCAATGCACCAAGCTGTCAGAGCTCT  
CCTGGGGTATGTGCCCTCAGCAACTTCCCCGCCATTTGCAAGACTGAGGAC  
TTCTCCAACCTGCCAAAGATATGGTGGTGCAGCTTTTGTACATGAGGA  
GCTAGAGACTGAAGATGAGAGACTGGTTTATGAAGCTGCCCTTAACTGGA  
TCAACTATGACCTGGAAAAGAGGCACTGCCATCTTCCAGAGCTCCTGAGG  
ACGGTCCGTCTGGCCCTGCTGCCCGCCATCTTTCTCATGGAGAACGTTTC  
GACAGAAGAGCTGATCAACGCCAGCCCAAGAGCAAGGAGCTGGTGGATG  
AAGCCATCCGCTGTAAGCTGAAGATCCTGCAGAACGATGGCGTCGTCAAC  
AGCCCGTGTGCTCGACCGAGAAAGACCAGCCATGCCCTATTTCTTCTGGG  
AGGGCAGACTTTCATGTGCGACAAGTTGTACCTGGTGGACCAGAAAGCCA  
AAGAGATCATCCCGAAGGCTGACATAACCAGCCCCAGGAAGGAGTTCAGC  
GCCTGCGCCATCGGCTGTAAGGTGTACATCACTGGTGGGA--GAGGCTC-  
AGAGAATGGTGTGTCCAAAGATGTGTGGGTCTACGACACCGTCCAAGAGG  
AATGGTGAAGGCGGCGCCCATGCTCATTGCCAGGTTTGGCCATGGCTCT  
GCGGAGCTGAAACACTGCCTCTACGTGGTGGGAGGTCACACGGCAGCAAC  
CGGCTGCCTCCCGCTTCTCCGTCTGGAGGAATACGTTGTTGTGTTTAGT  
CGCTCGACAACAAGGCTGATACTGAATGAAGCGGAGCTAATCATGACGCT  
GGCCAGGAGTACCAGATGCGAGTGGTACAGTAAACCTAGAGGACCAGA  
CTCTCCCCAGTATCGTCCAGGTGATCAGCGGTGCTTCCATGTTAGTCAGC  
ATGCACGGAGCTCAGCTCATCACCTCGCTCTTCCCTCCCCAGAGGAGCTGT  
CGTGGTGGAGCTGTTCCCCTTCGCTGTGAACCCAGAGCAGTACACCCCAT  
ATAAAACCTTAGCCACCCTTCCGGGCATGGACCTCCACTACGTCTCCTGG  
AGGAACACCAAGGAGGAGAACACCATCACCCACCCAGACCCGACCCTGGGA  
ACAAGGGGGCATCGTTCACCTGGAGAAGGAGGAGCAAGAGCGAATACTGG  
CGAGCAAAGACGTCCCAGGCACCTGTGCTGCCGCAACCCAGAGTGGCTC  
TTCCGGATCTATCAGGACACTTTGGTGGACATCCCTTCCTTCCCTGGAAGT  
CCTTAA---AGAGGGCATGAAG---ACAAAGCCCAGCGTGAAGAA---GT  
CAAAGCCGGCCAGCACAGTCCACCCGGGCGGGTCAGGGAGCCCCAGTGT  
CAGACCTCGGTACAAACCACCAATGAGGCTAAACTCACAGTGTCTTGGCA  
GATCCCCTGGAACCTCAAATACCTGAAGGTGAGAGAGGTGAAGTACGAGG  
TGTGGATCCAGAAAAGAGACACCAGCAAGGGGACACTGGAGGATCAAATC  
ATCCAGGCGAACCTGCGCTGGAGGCTTTCGGCAACGCCAAAACGTTGAG  
AAACGACAACTCGTCTCGTTTTGGAAAATTCATCCGCATTCACCTTTGGTA  
CGAGCGGCAAGCTGTGCTGCGGACATCGAGACGTACCTGCTGGAGAAG  
TCACGGTGCACCTTTCAGCTCAAGGCTGAGAGGAACTACCACATCTTCTA  
CCAGATCCTGTCCAATCAGAAGCCAGAGCTGCTGGACATGCTGCTGATCA  
CCAACAACCCGTACGACTACTCCTACATCTCCCAAGGAGAGGTAACAGTC  
GCCTCCATCGACGACTCGGAGGAGCTGATGGCCACCGACAGCGCCTTCGA  
TGTGCTCGGCTTCACTGCAGAGGAGAAGATGGGCGTCTATAAACTAACCG  
GTTCCATCATGCACTACGGCAACATGAAGTTCAAACAGAAGCAGCGTGAG  
GAGCAGGCTGAGTCAGACGGGACGGAGGCTGTTGATAAAACGGCTTACCT  
AATGGGGCTGAACTCTGCTGACGTCATCAAAGGGCTGTGCCATCCCAGAG

TCAAGGTAGGAAATGAATACGTACCAAAGGCCAAAGTGTGGACCAAGTC  
TACTACCCCAACAAGGAGGCCTTCAAGTGTGAGGAGTGTGGGAAGCACTA  
CAACACCAAGCTGGGATATAAGCGCCATGTGGCCATGCACTCTGCCACAG  
CAGGGGATCTCACCTGCAAAGTGTGCATGCAGAGCTATGAGAGCACCCCC  
GTGCTCTTGGAGCACCTCAAGAGCCACTCCGGGAAGTCTTCGGGTGGCGC  
CAAGGAGAAAAAACACCCCGTGCACCCTGTGACCGTCGATTCTACACAC  
GGAAGGATGTGAGACGGCACATGGTGGTCCACACAGGCCGAAAGGACTTC  
CTATGCCAGTACTGTGCCAGCGCTTGGCAGGAAGGACCATCTGACACG  
CCACGTGAAGAAGAGCCACTCGCAGGAGCTGCTGAGGATCAAGACGGAGC  
CTCCTGATATGTTAGGTCTTTTAGCTTCTGGGTACCACCTTGCTCTGTG  
AAGGAGGAGCTCAGCCCATGATGTGCGGCATGGGTCCCAACAAAGACCC  
CATGATGGGCAAACCGTTCCTCAAGTGGGGCCCTTTTCCGATGGGCATGT  
ACAACCCCAACCAT-----CTCCAGGCCATGTCTAATTCTGGGGTGGGT  
CACCCA-----CACCCGTCCCTGATGCCTAGTCCCTTGTCTGCTGCTAT  
CGGCATGGGCTGTACATGGAATATCTCATTACGCCTCTTTCTCGTTCA  
TGGGATGTTTACAAATCAGTGATGGATCAAATGTCGTGAACCTGCTGTCT  
AGCAACTCTCCGAGTGTTCGTACGCGCTGACCCAGCAGAAATACTTCAG  
CAACTACAGTCCCGTGATTGGGTTTACATTTACGAGCCCATCGAGTACT  
GGAACTCCACGGTGCAGGAGCACCTGAAGACTCTGAGTCATGGCTTCAAC  
AAGATCTCTTGGATGGACAACCTTTTCCACTACCTGCGGGTGGTGAACGT  
GAGCGCATCAACCAAGAGCGACTTCATCACCATCCTCAAGGGCTCCTTCC  
TGCGCAGCCCGGAGTACCAGCACTTCACCGAGGACATCATATTCTCCAAG  
A---ACCGCAGACCG-----ATGAATACGACATCATCGCCTCACGGAT  
GTACCTGGTGGCACGGACGACGGAGAAGAAGCGAGAGGAGGTGGTGGAGC  
TTCTGAAAAGCTTCGTCCGTTGATGCTGATCAACAGCATCAAGTTCATT  
GCCTTCAACCCTACGTTTGTGTTTCATGGACCGCTACAGCTCCTCCGTCAT  
CTCGCCCATCCTGACCTCAGGCTTCAGCGTACTCACAATCCTCATCCTCA  
CTTTCTTCCCTGGTCATCAACCCCTTGGGAAACTTCTGGCTCATCCTCACG  
GTGACGTCCCGTGGAGCTAGGCGTCTTGGGTTTGATGGGCTTTCACAGTT  
TGAATGGCAGCCAGCTCTCAAGAACGTGTCTACATCTTGCAGCGTTGGCA  
TTATTAAGGGGCTCTCTGGATGGGCTTCCTCGGTGGATGACATCCCGGCT  
GACACCATCACTCGGCGCTTTCGCTATGATGTGGCGCTGGTGTGCGCTTT  
AAAGGATCTGGAGGAGACATCGTGGAGGGGCTGAGAGAGAGCGGGATGG  
AAGACAGCGCTTGCACCTCGGGCTTCAGTGTGATGATCAAGGAGTCCTGT  
GATGGCATGGGCGATGTCAGCGAGAAGCACGGCGGAGGACCAGCTCTTCC  
CGAGAAGGCTGTGCGCTTTTCTTTCACTGTTATGTCTGTCTCTGTCTGG  
CAGACGAGGGGGAG-----GAAGAG  
GTTACCATCTTCACTGAGCCAAAGCCAAACTCAGAAGTGTCTGTGTAAGCC  
CCTCTGCCTGATGTTTGTGGATGAGTCAGACCACGAGACGCTCACAGCCG  
TCCTCGGGCCTGTTATCGCGGAGCGCCACGCCATGAAAGAGAGCAGGCTC  
ATCCTGTCTTGGCGGGATTGCCTTGCTCCTTCCGCTTCCACTTCAAAGG  
CACGGGATACGATGAGAAGATGGTGCCTGAGATGGAGGGCCTCGAGGCCT  
CGGGGTCCACCTACGTTTGCACGCTTTGTGACTCCACGCGGGCGCAGGCC  
TCTGAAAACATGGTGTGCACTCCGTCCTGCTGTCACGAGGAGAACCT  
AGATCGTTACGAGATATGGAGAACCAACCCCTTTTCTGAGTCTGTGGACG  
AGCTGCGGGACAGAGTCAAAGGGGTCTCCGCCAAGCCCTTCATGGAGACC  
CAGCCCACGATGGACGCGTTACTGCGACATCGGCAACGCCACCGAGTT  
CTACAAAATCTTCCAGGACGAGATCGGGGAGGTGTACAAAAGGT---CA  
AC---CCCAGCCGGGAGGAGCGGCGCAGCTGGAGGGCAGCCCTAGATAAA  
CAGCTGAGGAAGACGATGAAGCTGAGACCGGTGATGAGGATGAATGGGAA  
CTACGCGCGCAAGCTAATGACCCAGGAGGCTGTGGAGGTGGTGTGCGAGC  
TGGTGCCCTCGGAGGAGAGGAGGGAGGCCCTGAGGGAGCTGATCAGGATC  
TACCTCCAGATGAAGCCCGTGTGGCGCGCCACCTGCCCCGCCAAGGAGTG

CCCCGACCAGCTGTGCCGCTACAGCTTTAACTCCCAGCGCTTCGCCGACC  
TCCTCTCCTCTGCCTTCAAATACAGGTACAACGGCAAGATAACCAATTAC  
CTGCACAAGACCCTGGCCACGTGCCCGAGATCATAGAGAGAGACGGATC  
CATCGGAGCCTGGGCCAGCGAAGNNNNNNNNNNNNNNNNNNNNNTCGTACACCATCGAGATGGGTCCCCTG  
GGGCCCTGTGGAAGGAGAGCCCAATGCCGTTCTCCTGCTCCATCGAAGA  
CCCAACAAAACAGACAAAGTTCAAGGGCATCAAGACGTACATTTTCGTACC  
GGGTGACGCCTAGCGACACGGGGCGCCCCGTCTACAGGCGCTACAAACAC  
TTTGACTGGCTGTACAACCGCTTGCTGCACAAGTTCACTGTGATCTCCGT  
GCCCCACCTGCCCCGAGAAGCAGGCCACGGGGCGCTTCGAGGAAGACTTCA  
TCGAGAAGCGCAAGAGGGCGACTGATACTGTGGATGAACCACATGACCAGT  
CACCCGGTCTCTCCAGTACGAAGGCTTCGAGCACTTTCTGATGTGTGC  
CGACGACAAGCAGTGGAAACTCGGCAAGAGGGCGGGCTGAAAAGGACGAGA  
TGGTGGGCGCCATTTTCATGCTGACCCTCCAGATCCCCAACGAGCACCAG  
GACCTCCAGGATGTAGAGGAGCGCATCGACACCTTCAAGGCCTTCGCTAA  
GAAAATGGACGACAGCGTGTTCAGCTCACTCACGTCGCCTCGGAGCTGG  
TGCGTAAGCACCTGGGTGGGTTTCAGGAAGGAGTTCAGCGGCTGGGAAAT  
TCTTTCCAGTCCGTCAGCCAGGCGTTCATGCTGGACCCTCCCCAACAGCTC  
AGAGGCCCTCAACAAGGCCATCTCCCAT-----

-----NNNNNNNTCGCTTTCACCCTGGCGTGGTGAATGGTCCC GGCA  
CGGAGC---GCAGCGTCCC ACTCGGCAACAGCTTG---CCTTGCGACGA  
GCCCAACA--CGGTGGTTGCCACCCCCCGCAGCGATGGTTTGTACAC--  
--CTAGCAACAACCGACTGGACTTTGCAGCCTCGGCATACGACGCGGCT--  
-----GATTTGCGCCGTAACGCGGCCACCTTGCTGTCTACGCGGCG  
GCCGGAGTGAAGGCTC-----TTCCGCTGCCGACTGCAGGCTGCTCCAA  
CCGGCTCTTGCTATTACGCAGACGCGTCCGGCTGCTGGGGCGGAGGAC  
GCACGCCGCCGAGTAC-----AACAAAGTCAAGCTCGGTTTTTT  
TCATGCTGGCCT---AACTCTATCAGTGGCCGAGCAGGTA---CC---AA  
CTACCTGG-----TAACGGAGGA---GGGA---GACTCCTCCATCCCTA  
CCGAGAGGTCACCG---AT---CACCGGCTCCGAGGAG---GCCAAACCC  
AAAGACATGACGTCACTGAGTCGTCGAGCTGGTTAATAGAGACGCCGTC  
CTCCATCAAGTCCATCGACTCGAGCGACTCTGGGATCTTCGAGCAGCAGG  
CCAAGAGGAGGAGAGTCTCACCTTCTGCCACGCCGGTTGTTTCCGTTTCT  
GAGACTGTGTCCCCGTTAAAGTCTGAGCATCACTCAACAGGCGAAGTCAC  
AGAGAGAGAAGTGGCGTTGGGGATAAATCCCTTCGCGGATGGGATGGGCG



CCTTCAAATAAAACCACACATCCCACGACATCGGCTCCGG---ACAAACG  
GCGTTTTCTCCAGGCG---CCCGTTACGCAGCAGCAGCCGCGCTCGG  
A---CACCACCA-----CCATCCGACGCA-----CTCT---TACTCCA  
CGGCGGCTTTCAACTCCACCAGGGACTTTCTCTCAGAAATCGGGGTTTC  
GGAGACGCCACTGG-----AGCTCAGCACAGCTTATTCGCGTC  
-----TGGAAGTTT---C-----GCAGGACCACATGGACACTCGG  
ATGCTGCTGGGCACCTGCTCTTCCAGGGCTGCACGAG---CAAGCCGCG  
AGCCATGCGTCTTCCAACGTGGTCAACAGCCAGATGCGCCTGGGCTTCTC  
TGGGGACATGTACGGACGGGCTGATCAGTACGGCCACGTTACGAGCCCGA  
GGT---CCGACCACTATGCGTCGACCCAGCTGCACGGCTACGGCCCCATG  
AACATGAATATGGCCGCG---CATCACGGTGCTGGGGCCTTCTTTCGATA  
CATGAGGCAGCCGATCAAGCAAGAGCTCATCTGCAAGTGGATCGAGCCCG  
AGCAGCTGACGAACCCGAAAAAGTCGTGCAACAAAACTTTTAGCACCATG  
CACGAGTTGGTGACCCATCTGACGGTGGAGCACGTTGGAGGACCCGAGCA  
GACCAACCACATCTGCTTCTGGGAGGAGTGCGCCAGAGAAGGGAAACCAT  
TCAAAGCCAAATACAACTTGTGAATCATATCAGAGTACACACCCGGAGAG  
AAGCCCTTCCCGTGTCTNNNNNNNNNNNNNNNNNNNNNNNNNNNNNN

>Sebastolobus alascanus

AGCCTACTCATTTCGGGCAGAACTTAGCCAGCCCCGGCGCTCTCCTTGGAGA  
CGACCAGATTTACAATGTAATTGTTACGGCCATGCCTTCGTAATGATTT  
TCTTTATAGTAATACCAATTATGATTGGAGGTTTTGGAAACTGGCTTATT  
CCCCTAATGATTGGGGCCCCGGACATAGCATTCCCTCGTATGAACAACAT  
AAGCTTCTGACTTCTTCCACCTTCTTTCTCCTACTCCTTGCCCTTTCAG  
GAGTAGAAGCGGGGGCCGGAACCGGGTGAACAGTATATCCTCCCCTTGCT  
GGTAATTTAGCCCACGCTGGGGCCTCCGTCGACCTAACGATCTTTTCCCT  
ACATCTGGCAGGGATTTCCCTCAATCCTCGGCGCAATTAACCTCATCACCA  
CAATTATTAATATAAAACCCCCAGCTATTTCTCAATACCAGACACCCCTG  
TTTATTTGGTCCGTCCTAATTACCGCCGTACTTCTTCTCCTCTCCCTCCC  
AGTACTAGCTGCGGGCATTACAATGCTTCTTACAGACCGAAATCTTAACA  
CCACTTTCTTTGATCCCGCTGGAGGAGGGGATCCAATCCTCTACCAGCAC  
TTGTTCTGATTCTTC-----  
-----  
-----  
-----

-----TTCCTAGAGAGAAACCTCCACCCGTCTAACTGCCTTGG  
CATGCTGTTGCTGTCTGACGCCCACCAGTGCACCAAGCTGTCAGAGCTCT  
CCTGGGGTATGTGCCTCAGCAACTTCCCACCATTGCAAGACAGAGGAC  
TTCTCCAACCTGCCAAAGATATGGTGGTGCAGCTTTTGTACATGAGGA  
GCTAGAGACTGAAGATGAGAGACTGGTTTATGAAGCTGCCCTCAACTGGA  
TCAACTATGACCTGGAAAAGAGGCACGTACCTTCCAGAGCTCCTGAGG  
ACGGTCCGTCTGGCCCTGCTGCCCGCCATCTTTCTGATGGAGAACGTTTC  
TACAGAAGAGCTGATCAACGCCCAGCCCAAGAGCAAGGAGCTGGTGGATG  
AAGCCATCCGCTGTAAGCTGAAGATCCTGCAGAACGAAGGCGTCGTTAAC  
AGCCCGTGTGCTCGACCGAGAAAGACCAGCCATGCCCTATTTCTCTGCGG  
AGGGCAGACTTTCATGTGTGACAAGTTGTACCTGGTGGACCAGAAAGCCA  
AAGAGATCATCCCGAAGGCTGACATACCCAGCCCCAGGAAGGAGTTCAGT  
GCCTGCGCCATCGGCTGTAAGGTGTACATCACTGGTGGAA--GAGGCTC-  
AGAGAACGGTGTGTCCAAGATGTGTGGGTCTACGACACCGTCCACGAGG  
AATGGTCAAGGCGGCACCCATGCTCATTGCCAGGTTTGGCCATGGCTCT  
GCTGAGCTGAAACACTGCCTCTACGTGGTAGGAGGTCACACGGCAGCAAC  
CGTCTGCCTCCCGGCTTCTCNNNNNGGATGAATACGTTGTTGTGTTTCAGTCGCTC  
GACAACGAGGCTGATACTGAATGAAGCGGAGCTAATCATGGTGTGGCC  
AGGAGTTCAGATGAGAGTGGTACAGTGTCCCTAGAGGACCAGTCTCTC

CCCAGCATCGTCCAGGTGATCAGCGGTGCTTCCATGTTAGTCAGTATGCA  
CGGAGCTCAGCTCATCACCTCGCTCTTCCTCCCCAGAGGAGCTGTCCTGG  
TGGAGCTGTTCCCTTCGCTGTGAACCCAGAGCAGTACACCCCGTATAAA  
ACCTCGCCACCCTTCCGGGCATGGACCTCCACTACGTCTCCTGGAGGAA  
CACCAAGGAGGAGAACCACATCACCCACCCAGACCGACCCTGGGAACAAG  
GGGGCATCGCTCACTTGGAGAAGGAGGAGCAAGAGCGAATACTGGCGAGC  
AAAGACGTCCCAGGGCACCTGTGCTGCCGCAACCCAGAGTGGCTCTTCCG  
GATCTACCAGGACACTCTGGTGGACATCCCTTCCTTCCTGGAAGTCCTTA  
A---AGAGGGCATGAAG---ACAAAGCCCAGCGTAAAGAA---GTCGAAG  
CCGGCTAGCACAGTCCACCCGGGCCGGGTGAGGGAACCCAGTGTGAGAC  
CTCGGTACAAACCACYAATGAGGCTAAACTCACAGTGTGCTGGCAGATCC  
CGTGGAACCTCAAATACCTGAAGGTGAGAGAGGTGAAGTACGAGGTGTGG  
ATCCAGAAAAGAGACACCAGCAAGGGGACACTGGAGGATCAAATCATCCA  
GGCGAACCTGCGCTGGAGGCTTTCGGCAACGCCAAAACGTTGAGAAAACG  
ACAACCTCGTCTCGTTTTGGAAAATTCATCCGAATTCACCTTGGTACAAGC  
GGCAAGCTGTGCTGTGCTGACATCGAGACGTACCTGCTGGAGAAGTCACG  
GTGCACCTTTCAGCTCAAGGCTGAGAGGAACTACCACATCTTCTACCAGA  
TCCTGTCCAATAAGAAGCCAGAGCTGCTGGACATGCTGCTGATCACCAAC  
AACCCGTACGACTACTCCTACATCTCCCAAGGAGAGGTGACAGTCGCCTC  
CATCAACGACTCGGAGGAGCTGATGGCCACCGACAGCGCCTTCGATGTGC  
TCGGCTTCACTGCAGACGAGAAGATGGGCGTCTATAAACTAACCGGTTCC  
ATCATGCACTACGGCAACATGAAGTTCAAACAGAAGCAGCGTGAGGAGCA  
GGCTGAGTCAGACGGGACGGAGGCTGCTGATAAAAACGGCTTACCTAATGG  
GGCTGAACTCTGCTGACGTCATCAAAGGGCTGTGCCATCCAGAGTCAAG  
GTAGGAAATGAATACGTCACCAAAGGCCAAACTGTGGACCAAGTCTACTA  
CCCCAACAAGGAGGCCCTTCAAGTGTGAAGAGTGTGGGAAGCACTACAACA  
CCAAGCTGGGATATAAGCGCCATGTGGCCATGCACTCTGCTACAGCAGGG  
GATCTCACCTGCAAAGTGTGCATGCAGAGCTATGAGAGCACACCCGTGCT  
CTTGGAGCACCTCAAGAGCCACTCCGGGAAGTCTTCGGGTGGCGCCAAGG  
AGAAAAAACACCCGTGCGACCACTGTGACCGTTCGTTTCTACACACGGAAG  
GATGTGAGACGGCACATGGTGGTCCACACAGGCCGAAAGGACTTCCGTGTG  
CCAGTACTGTGCCAGCGCTTGGCAGGAAGGACCATCTGACCGGCCACG  
TGAAGAAGAGCCACTCGCAGGAGCTGCTGAGGATCAAGACGGAGCCTCCT  
GATATGTTAGGTCTTTTAGCTTCTGGGTACCACCTTGCTCTGTGAAGGA  
GGAGCTCAGCCGATGATGTGCGGCATGGGTCCCAACAAGACCCCATGA  
TGGGCAAACCGTTCCCAGTGGGGCCCTTTTCCGATGGGCATGTACAAC  
CCCCACCAT-----CTCCAGGCCATGTCTAATTCTGGGGTGGGTACCC  
A-----CACCCGTCCCTGATGCCCGGTCCCTTGTCTGCAGCTATGGGCA  
TGGGCTGTACATGGAATATCTCATCTACGCCTCTTCTCATTTCATGGGA  
TGTTTACAAATCAGTGACGGATCAAATATCGTGAACCTGCTGGCTAGCAA  
CTCTCCGAGTGTTCGTATGCTCTGACCCAGCAGAAATACTTCAGTAACT  
ACAGTCCCCTGATTGGGTTTTACATTTACGAGCCATTGAGTACTGGAAC  
TCCACGGTGCAGGAGCACCTGAAGACTCTGAGTCATGGCTTCAACAAGAT  
CTCTGGATGGACAACCTTTTTCCACTACCTGCGGGTGGTGAATGTGAGCG  
CGTCAACCAAGAGCGACTTCATCACCATCCTAAAGGGCTCCTTCTGCGC  
AGCCCGGAGTACCAGCACTTCACTGAGGACATCATATTCTCCAAGA---A  
CCGCGAGACTG-----ATGAGTACGACATTATCGCCTCACGGATGTACC  
TGGTAGCACGGACGACAGAGAAGAAGCGAGAGGAGGTGGTGGAGCTTCTG  
GAAAAGCTTCGTCCGTTGATGCTGATCAACAGCATCAAGTTCATTGCCTT  
CAATCCTACGTTTGTGTTTCATGGACCGTACAGCTCCTCTGTATCTCGC  
CCATCCTGACCTCAGGCTTACAGGTAATCACAATCCTCATCCTCACTTTC  
TTCTGGTTCATCAACCCCTTGGGAACTTCTGGCTCATCCTCACGGTAAC  
GTCTGTGGAGCTGGGCGTCTTGGGTTGATGGGCTTTCACCAGTTTGAAT



-----  
-----  
-----  
-----  
-----  
-----  
-----

-----NNNNNNNNNNNNNNNNNNCCTGGCGTGGGGACCGGTCC  
TGGCACGGAGC---GCAGCGTCCCACCTCGGCAACAGCTTGCTGTCCCGC  
AGCAAACCGACGAGCCCACTGTTGCCACCCCCCGCAGCGATGGTTTGTC  
ACCC---CTGCCAACACCGACTGGACTTTGCCCGCTCGGCATACGACGC  
CGCC-----GATTCGCGCGTAACGCGGCCACCTTGCTGTCCACG  
CAGCGGCCGAGTGAAGGCTC-----TTCCCCTGCCGACCGCGGGCTGC  
TCCAACCGGCCTCTTGGCTATTACGCGGACCCGTCGG---GCTGG---GG  
AGGACGCACGCCCGCGCAGTACTGCGGCGTGAGCGGCAAATCCAGCTCGG  
TCTTTTCCTGCTGGCCCCGCAACTCGATCGGCGGAAGAGCGGGCA---CC  
---AACTACCTGG-----CGGAGGA---GGGA---GACTCCATCAT  
CCCGACGGAGAGGTCTCCG---AT---CGGCGGCTCGGAGGAG---ACCA  
AACCCAAAGACATGAC---CTCGGA---GTCGAGCTGGATAGAG---ACG  
CCGTCTCCATCAAGTCCATCGATTGAGCGATTCTGGTATCTTCG---A  
GCAGGCCAAAAGGAGAAGAATCTCACCTTCTGCCACGCCG-----G  
TTTCAGAGACTGTGTCCCCNNNNNNNNNNNNNNNNNNCATCACTCAACAGGCGAAGTACAGAGAGAG  
AAGTGGCGTTGGGGATAAATCCGTTTCGCGGATGGGATGGGGCGCCTTCAA  
ATAAACACAGCTCCCACGACATCGGCTCCGG---ACAACGGCGTTTTTC  
CTCCCAGGCG---CCGGGTAC---GCWGCAGCCGCTCTGGGA---CACC  
AYCA-----CCACCCGACCCACGTTGGCTCT---TACTCCACGGCGGCT  
TTCAACTCCACCAGGACTTTCTCTTCAGAAATCGGGGTTTCGGGGACGC  
CACCG-----GGCTCAGCACAGTTTGTTCGCCTC-----  
-CGGAAGTTT---C-----GCAGGGCCACATGGACACTCAGATGCAGCG  
GGGCACCTGCTCTTCCCGGGGCTCCACGAG---CAAGCGGCGAGCCATGC  
RTCTTCCAACGTGGTCAACAGCCAGATGCGGCTGGGCTTCTCGGGGGACA  
TGTACGGACGGGCCGACCAGTACGGCCACGTTACGAGCCCACGGT---CC  
GACCACTATGCTTCGACCCAGCTGCACGGCTACGGCCCCATGAACATGAA  
TATGGCCGCG---CACCACGGAGCCGGGCTTCTTTCGATAACATGAGGC  
AGCCGATCAAACAAGAGCTCATCTGCAAGTGGATCGAGCCGGAGCAGCTG  
ACGAACCCCAAAAAGTCGTGCAACAAAATTTTAGCACGATGCACGAGCT  
GGTGACCCATCTGACGGTGGAGCATGTTGGGGGACCGGAGCAGACCAACC  
ACATCTGCTTCTGGGAGGAATGCGCCAGAGAAGGAAAGCCATTCAAAGCC  
AAATACAAACTTGTAATCATATCCGAGTACACACCGGAGAGAAGCCCTT  
TCCGTGTCCGTTCCCCGGCTGTGGCAA

>Selenotoca multifasciata  
AGCCTCCTCATCCGTGCTGAACTAAGTCAACCAGGGGCTCTCCTTGAGGA  
CGACCAAATCTATAATGTAATCGTAACGGCACATGCCTTTGTAATAATTT  
TCTTTATAGTCATGCCAGTAATAATTGGAGGCTTTGGGAAGTACTACTAATC  
CCTCTAATAATTGGGGCACCCGATATGGCCTTCCCCGAATAAAACAATAT  
AAGCTTCTGACTCCTGCCCCCTCCTTCCTTCTTCCTAGCTTCCCTCCG  
GAGTAGAGGCTGGTGCCGGGACAGGATGAACCGTCTACCCTCCCCTCGCT  
GGAAATCTAGCTCACGCAGGGGCTCCGTAGACCTAACTATCTTCTACT  
TACTTAGCAGGTATTTCTTCCATCCTTGGGGCTATTAACCTTTATTACTA  
CTATTATTAACATAAAATCACCTGCCGCCTCCCAATACCAGACCCCTCTC  
TTCGCTGAGCCGTAATAATCACCGCAGTACTTCTTCTTCTATCGCTCCC  
AGTTCTCGCTGCCGGCATTACTATGCTTCTCACAGATCGAAACCTGAACA

CTTCTTTCTTCGACCCCGCAGGAGGAGACCCAATCCTATAACCAACAT  
CTA-----

-----  
-----  
-----

-----NNNCTAGAGAGAAACCTTCACCCATCCAACCTGCCTTGGCAT

GCTGTTACTGTCTGACGCCACCAGTGCACCAAGCTGTCAGAGCTCTCCT  
GGGGCATGTGCCTCAGCAACTTCCCTGCTATTTGCAAGACAGAGGACTTC  
CTCCAACCTGCCYAAAAGATATGGTGGTGCAGCTTTTGTCCCACGAGGAGCT  
AGAGACTGAAGATGAGAGACTGGTTTATGAAGCCGCCCTCAACTGGATCA  
ACTATGACCTGGAAAAGAGGCACTGCCACCTTCCGGAGCTCCTGAGAACG  
GTCCGTCTCGCCCTCCTGCCTGCCATCTTTCTCATGGAAAATGTTTCTAC  
AGAAGAGCTGATCAACGCCCAGGCCAAGAGCAAAGAGCTGGTGGATGAAG  
CTATCCGCTGTAAGCTGAAGATCCTACAGAATGATGGTGTCTGTTAACAGC  
CCGTGTGCTCGTCCAAGAAAACCAGCCATGCACTCTTTCTTCTGGGTGG  
GCAAACCTTTCATGTGTGATAAATTGTACCTGGTGGACCAGAAAAGCCAAAG  
AGATCATCCCCAAGGCTGACATTTCCAGCCCCAGGAAGGAGTTCAGCGCC  
TGCGCCATCGGCTGTAAGGTGTACATCACTGGTGGTA--GAGGTTC--AGA  
GAATGGTGTGTCCAAAGATGTTTGGGTCTACGACACCGTCCACGAGGAAT  
GGTCGAAGGCAGCACCAATGCTTATTGCCAGGTTTGGCCACGGCTCTGCG  
GAGCTGAAACACTGCCTCTACGTGGTAGGAGGTCACACCGCAGCAACTGG  
GTGCCTTCCGGCCTCTCCATCTGGATGAATACATTGTTGTGTTTAGCCGT  
TCAACAACGAGGCTGATACTGAATGAAGCTGAGCTAATCATGGCACTGGC  
CCAGGAATTTTCAGATGAAAGTAGTCACAGTGTCCCTTGAGGAACAGTCTT  
TCCCTAGTATTGTCCAGGTAATCAGTGGTGTACCATGTTAGTCAGTATG  
CATGGAGCCCAGCTTATCACTTCATTGTTTCTCCCGAGAGGAGCCACTGT  
GGTGGAGCTGTTCCCTTTTGGTGTGAACCCAGAGCAGTACACCCCATACA  
AAACGCTTGCTTCCCTACCAGGCATGGACCTTCACTATATCTCTTGGAGG  
AACACTCAGGAGGAAAACACCATCACCCACCCAGACAGACCCTGGGAACA  
AGGGGGTATTGCTCACTTGGATAAGGAGGAGCAAGAGCGAATACTGGCAA  
GCAAAGATGTCCCCAGGCACCTGTGCTGCCGCAACCCAGAGTGGCTTTTC  
CGTATCTACCAGGATACCTTGTAGTACATCCCTTCATTTTTTGGAAAGTCAT  
CAA---AGAGGGCATGAAG---ACAAAGCCCAGCTTCAAGAA---GTCAA  
AGCCAGCCAGCACATTCACCCGGGGCAGAGAAACCCAGTGTGTCAG  
ACCTCAGTACAAACCACTAATGAGGCTAAACTTACAGTCTCCTGGCAGAT  
CCCCTGGAATCTGAAATACNNNNNNNNNNNNNNNNNNNNNNNNNNNNNNNNNNNNNNNNNNNNAAAAAGGACACC  
AGCAAGGGTACATTGGAGG  
ATCAAATCATCCAGGCGAACCCAGCACTGGAGGCCTTCGGCAACGCCAAA  
ACACTGAGAAATGACAACTCATCTCGTTTTGGAAAATTCATCCGAATTCA  
CTTTGGCACAAAGTGGCAAGCTGTACATCCGCTGACATTCAGACGTACCTGC  
TGGAGAAGTCACGCGTCACCTTTCAGCTCAAGGCTGAGAGAAATTACCAC  
ATCTTCTACCAGATCCTGTCCAACCAGAAACCAGAGCTGCTGGACATGCT  
GCTGATCACTAATAACCCATATGACTACTCCTACATCTCCCAAGGAGAGG  
TAACAGTCGCCTCCATCAATGACTCAGAGGAGCTGATGGCCACTGACAGC  
GCCTTTGACGTGCTCGGCTTCACTCCAGAAGAGAAGATGGGCGTCTACAA  
ACTGACGGGGGCCATCATGCACTATGGCAACATGAAGTTCAAACAGAAGC  
AGCGTGAGGAACAGGCTGAGCCAGATGGGACTGAGGCTGCTGATAAATCA  
GCTTACCTAATGGGGCTAAACTCTGCTGACCTCATCAAGGGGCTGTGCCA  
TCCCAGAGTCAAAGTAGGAAATGAATACGTCACCAAAGGCCAAAAGTGTGG  
ACCAAGTCTACTACCCCAACAAGGAGGCCTTCAAGTGTGAGGAGTGTGGG  
AAGCACTACAACACCAAGCTAGGATATAAGCGCCATGTGGCCATGCACTC  
TGCCACAGCAGGTGATCTCACCTGTAAAGTCTGCATGCAGACCTACGAGA  
GCACGCCTGTGCTCTTAGAGCACCTGAAGAGCCACTCCGGAAAATCTTCA

GGTGGTACCAAGGAGAAAAACACCCATGCGATCACTGTGACCGGCGTTT  
CTACACACGGAAAGATGTGAGACGGCACATGGTGGTCCACACTGGCCGAA  
AGGACTTCCTGTGCCAGTACTGTGCTCAGCGTTTTGGCAGGAAGGACCAT  
CTGACACGTCTATGTGAAGAAGAGCCACTCACAGGAGCTGCTGAAAATCAA  
GACAGAGCCTCCTGATATGTTTGGTCTTTTAGCTTCCGGGTACCACCTT  
GCTCTGTGAAGGAGGAGCTCAGCCCCATGATGTGTGGCATGGGTCCCAAC  
AAAGACCCCATGATGGGCAAACCGTTCCCCAGTGGGGCACCTTTTCCAAT  
GGGCATGTACAACCCCAACCAT-----CTCCAGGCCATGTCTAATTCTG  
GTGTGGGCCACCCA-----CACCCATCCCTGATGCCAGTTCCCTGTCT  
GCAGCTATGGGAATGGGCTGTCACATGGAANNNNNNNNNNNNNNNNNNNNNNNNNNNNNNNNNNNNNNNNNNNNNNNNNNNNNNNNNNATGTTTAC  
AGATCAGTGATG  
GATCCAATATCGTGAACCTGCTGGCTAGTAACTCTCCAAGTGTTCGTAT  
GCTTTGACACAGCAAAAATACTTCAGTAACTACAGTCCCTGTGATTGGGTT  
TTACATCTATGAGCCATTGAATACTGGAACCTAACGGTGCAGGAACACC  
TGAAGACTCTGAGTCACTGGCTTCAACAAGATCTCTGGATGGACAACCTTT  
TTCCACTACCTGCGAGTGGTGAATGTGAGTGCCTCAACCAAGAGCGACTT  
CATCTCCATACTCAAGAGCTCCTTCCCTGCGCAGCCCGGAGTACCAGCACT  
TCACTGAGGACATCATATTTCTCGAAAA---ACCGCGAGACTG-----AC  
GAGTACGACATTATTGCATCGCGGATGTACCTGGTGGCACGGACGACGGA  
GAAGAAGCGGAGGAGGTGGTGGAGCTTCTGGAAAAGCTGCGTCCGTTGA  
TGCTGATCAACAGCATCAAATTCATTCCTCAATCCTACATTTGTGTTT  
ATGGACCGCTACAGTCCCTCTGTCTATCTCTCCATCCTGACCTCAGGATT  
CAGCGTCCCTCACAATCCTCATCGTCACTTNNNNNNNNNNNNNNNNNNNNNNNNNNNNNNNNNNNNNNNNNNNNNNNNNNNNNNNNNNNNNNNNNNNNNN  
NNNNNNNNNNNNNNNNNNNNNNNNNNNNNNNNNNNNNNNNNNNNNNNNNNNNNGGGTTCACCAGTTTGAATGG  
CAGCCAGCTCTTAAGAATGTTTCTACATCTTGAATGTTGGCATTATTA  
TGGGCTCTCTGGATGGGCTTCCCTCAGTGGATGACTCCCCAGCTGACACCA  
TCACTCGGGCGTTTCGCTATGATGTGACACTGGTGTCAGCATTAAAGGAT  
CTGGAGGAGGACATCATGGAGGGGCTGAGAGAGAGAGGGATGGAAGACAG  
TACTTGACCTCAGGCTTCAGTGCATGATCAAGGAATCTTGATGGCA  
TGGGCGATGTGAGCAGAAAGCATGGTGGAGGACCAGCTGTTCCCTGAGAAG  
GCTGTACGTTTCTCTGTCTACCATTATGTCTATCTCTGTCTTGGCGACCGA  
TAGGGAG-----GAAGAGGTTACCA  
TCTTCAGAGAGCCAAAGCCAAACTCAGAACTGTCTTGTAAGCCTCTTTGC  
CTGATGTTTGTGGATGAGTCAGACCATGAGACACTCACAGCCATCCTGTG  
GCCATAATTGCAGAGCGTAATGCAATGAAAGAGAGCAGGCTCATCCTAT  
CCATTGGTGGACTACCTCGCTCCTTCCGTTTTCTCAGAGGCACAGGA  
TATGATGAGAAGATGGTGCCTGAGATGGAGGGCCTGAAGCTTCAGGATC  
CACGTATATCTGCACTCTTTGTGATTCAGTCCGGGCAGAGGCCTCTGAAA  
ACATGGTCCCTCAGCGAGTTACCCGCAGCCATGAAGAGAACCTAGAACGT  
TATGAAATATGGAGAACCAACCCCTTTTCTGAGTCACTAGATGAGCTGCG  
AGACAGAGTCAAAGGGGTCTCTGCCAAGCCCTTATGGAGACCCATCCCA  
CCCTGGATGCATTGCACTGTGACATAGGCAATGCCACTGAGTTCTACAAA  
ATTTTCCAGGATGAGATTGGGAGATGTACCAGAAGGT---CAAT---CC  
GAGTCGAGAGGAGCGCGCAGCTGGAGAGCAGCCCTAGATAAACAGCTGA  
GGAAGAAGATGAAGCTCAAACCCATAATGAGGATGAATGGGAACTATGCC  
CGCAAGCTAATGACCATGGAGGCTGTGGAGGTGGTGTGTGAGTTGGTGCC  
CTCAGAGGAGAGGAGGAGGCTCTGAGGGAGCTTATGAGACTCTACCTCC  
AGATGAAGCCTGTGTGGCGAGCCACTTGCCAGCCAAGGAGTGCCCTGAC  
GAGCTATGTCGCTACAGTTTTAATFCCCAGCGCTTTGCTGACATCCTCTC  
CTCTACCTTCAAATA TAGGTACAATGGAATAATAAATAATTACCTGCACA  
AGACCCCTGGCCATGTGCCTGAAATCATAGAGAGAGATGGATCGATAGGA  
GCATGGGCTAGCGAGGAAACGAGTCCGGCAAACAATCTTACACCATCGA  
AATGGGTCCCTTGGGGCCTCGATGGAAGGAGAGCCACAGCCTTTCACCT



CGCCTC-----CGGAAGTTT---C-----GCAGGGCCACATGGAC  
ACTCAGATGGAGCGGGGCACCTGCTCTTCCCGGGGCTCCACGAG---CAA  
GCGGCGAGCCATGCGACTTCCAACGTGGTCAACAGCCAGATGCGGCTGGG  
CTTCTCGGGGACATGTACGGACGGGCCGAGCAGTACGGCCACGTTACAA  
GCCCCGAGGT---CCGACCATTATGCTTCGACCCAGCTGCACGGCTACGGC  
CCCATGAACATGAATATGGCCGCA---CACCACGGAGCAGGGGCTTCTT  
TCGATACATGAGGCAGCCGATCAAACAAGAGCTCATCTGCAAGTGGGTGCG  
AGCCGGAGCAGCTGACGAATCCCAAAAAGTCGTGCAACAAAACCTTTTAGC  
ACGATGCACGAGCTCGTGACCCATCTGACGGTGGAGCATGTGGGGGGACC  
GGAGCAGACCAACCACATCTGCTTCTGGGAGGAATGTTTCGAGAGAAGGGA  
AGCCATTCAAAGCCAAATACAAACTTGTAAATCATATCAGAGTACACACC  
GGAGAAAAGCCCTTCCCGTGCCGTTTCCCGGCTGTGGCAA

>Seriola dumerili

AGTTTACTCATCCGAGCAGAATAAGCCAACCCGGGGCTCTCCTGGGAGA  
CGATCAAATTTACAACGTAATCGTTACAGCACACGCGTTTGTAAATAATTT  
TCTTTATAGTAATGCCAATTATGATTGGAGGATTTGGGAACTGACTCATC  
CCTTTAATGATCGGAGCTCCCGATATAGCATTCCCTCGAATGAATAATAT  
GAGCTTCTGACTCCTCCCTCCTTCATTCCTTCTACTCCTAGCCTCTTCGG  
GTGTTGAAGCCGGAGCCGGGACAGGTTGGACAGTTTACCCGCCTCTGGCC  
GGCAACCTCGCCCACGCAGGAGCATCCGTAGACTTAACAATTTTCTCCCT  
TCACTTAGCTGGGATCTCCTCAATTCCTAGGAGCTATTAACCTTCATCACA  
CCATCGTCAATATGAAACCCACGCCGTTTCCATGTACCAAATTCCCCTG  
TTTGTCTGAGCTGTCCTTATCACGGCTGTACTCCTACTCCTATCACTTCC  
AGTCCTAGCCGCCGTATTACAATGCTTCTTACAGACCGAAACTTAAACA  
CTGCCCTCTTTGACCCAGCTGGAGGAGGGATCCCATCCTTTACCAACAC

-----  
-----  
-----  
-----

-----NNNNTAGAGAGAAACCTTACCCTTCTAACTGTCTTGGCATG  
TTGTTGCTGTCTGACGCCACCAGTGTACCAAGCTGTCAGAGCTTTCCTG  
GGGCATGTGCCTCAGCAACTTCCCTGCTATCTGCAAGACAGAGGACTTCC  
TCCAAC TGCCCAAAGACATGGTGGTCCAGCTTTTATCGCACGAGGAGCTA  
GAGACAGAAGATGAGAGACTGGTTTACGAAGCTGCCCTTAACTGGATCAA  
CTATGACCTGGAGAGGAGGACTGCCACCTTCCAGAGCTTCTGAGAACGG  
TCCGCTCGCCCTGCTGCCTGCCATCTTCTGATGGAGAATGTCTCGACA  
GAGGAGCTGATCAACGCCACAGGCCAAGAGCAAGGAGCTGGTGGATGAAGC  
TATCCGCTGTAAGCTGAAAATCCTGCAAAATGACGGCGTCGTCAACAGCC  
CGTGTGCCCGACCAAGAAAACAGCCATGCCCTGTTTCTTCTGGGAGGG  
CAGACTTTCATGTGTGACAAGTTGTACCTGGTGGACCAGAAGGCCAAAGA  
GATCATCCCCAAGGCGGACATCCCCAGCCCCAGGAAGGAGTTCAGCGCCT  
GCGCCATCGGCTGTAAGGTGTACATCACTGGAGGGA--GAGGCTC-AGAG  
AACGGCGTGTCTAAAGATGTATGGGTGTACGACACCGTCCACGAGGAATG  
GTCCAAAGCTGCTCCCATGCTCATCGCCAGGTTTCGGCCATGGCTCGGCGG  
AGCTGAAACACTGCCTCTACGTGGTAGGAGGTCATACTGCAGCAACTGGC  
TGCTCCAGCTTCTCCGTCGGGATGATTACATTGTTGTGTTTCAGTCGCT  
CAACAACAAGGCTGATACTTAATGAGGCGGAGCTAATCATGGCGCTGGCC  
CAGGAGTTCAGATGAGAGTGGTYACAGTGTCCCTGGAGGAACAGTCATT  
CCCCAGCATCGTCCAGGTGATCAGCGGCGCGCCATGCTAGTCAGCATGC  
AYGGAGCTCAGCTCATCACCTCACTCTTCCCTCCCCAGAGGAGCTGCTGTG  
ATGGAAGTGTTYCCCTTTGCTGTGAACCCAGAGCAGTACACCCCGTACAG  
AACCTTGGCCTCCCTTCCAGGCATGGACCTTCACTATATCTCCTGGAGGA  
ACACTAAGGAGGAAAACACCATCACCCACCCAGACAGACCCTGGGAACAA



GGAGGCATTGTTACCTGGAGAAGGAGGAGCAGCAGCGGATACTGGCCAG  
TAAGGACGTTCCCAGGCACCTGTGCTGCCGCAACCCAGAGTGGCTCTTCC  
GGATCTACCAGGACACTTTAGTGGACATCCCCTCCTTCTGGAAGTCCTC  
AA---AGAGGGCATGAAG---ACCAAGCCCAACTGAAGAA---GTCAA  
ACCGGCCAGCTCGGTCCACCCGGGCGAGTCAGAGAACCTCAGTGTGAGA  
CCTCAGTACAAAACACTAACGAGGCCAAACTCACAGTCTCCTGGCAGATC  
CCGTGGAATCTGAAGTACCTGAAGGTAAGAGAGGTGAAGTACGAGGTGTG  
GATCCAGAAAAAGACACCAGCAAGGGGACGCTGGAGGATCAGATCATCC  
AGGCGAACCTGCACTCGAAGCCTTCGGCAACGCCAAAACACTAAGAAAC  
GACAACTCATCTCGTTTTGGAAAATTCATTCGAATTCACTTCGGGACGAG  
CGGCAAACCTGTCGTCTGCTGACATCGAGACGTACCTGCTGGAGAAGTCTC  
GTGTCACCTTTTACGCTCAAGGCTGAGAGGAACTACCACATCTTCTACCAG  
ATCCTGTCCAATCAGAAGCCAGAGCTACTGGACATGCTGCTGATCACCAA  
CAACCCGTACGACTACTCCTACATCTCCAAGGAGAGGTGACAGTCGCCT  
CCATCAACGACTCTGAGGAACTGATGGCCACCGACAGCGCCTTCGATGTG  
CTCGGCTTCACTCCAGAGGAGAAGATGGCCGTCTACAAACTGACCGGCGC  
CATCATGCACTACGGCAACATGAAGTTCAAACAGAAGCAGCGTGAGGAAC  
AGGCTGAACCTGATGGGACTGAGGCTGCTGATAAAATCAGCTTACCTAATG  
GGGCTGAACTCCGCTGACCTCATCAAAGGCCTGTGCCACCCCAGAGTCAA  
GGTAGGAAATGAATATGTCACCAAAGGCCAAAGCGTGGATCAGGTCTACT  
ATCCCAACAAGGAGGCCCTTCAAGTGTGAAGAGTGTGGGAAGCACTACAAC  
ACCAAGCTGGGATATAAGCGCCATGTGGCCATGCACTCTGCCACGGCAGG  
GGATCTCACCTGTAAAGTGTGCATGCAGAGCTACGAGAGTACGCCTATTC  
TCCTGGAGCACCTCAAGAGCCACTCCGGGAAGTCTTCGGGTGGCACCAAG  
GAGAAAAAGCACCCGTGCGACCACTGTGACCGTCGCTTCTACACACGGAA  
GGATGTGAGGCGACACATGGTGGTCCACACGGGTCGGAAGGACTTCCTGT  
GCCAGTACTGTGCCAGCGCTTCGGCAGGAAGGACCACCTGACACGCCAC  
GTAAAGAAGAGCCACTCGCAGGAGCTGCTGAAGATCAAGACGGAGCCTCC  
AGATATGTTAGGTCTTTTAGCCTCGGGATCACCACCTTGCTCTGTGAAGG  
AGGAGCTCAGCCCCATGATGTGCGGCATGGGTCCCAACAAGACCCCATG  
ATGGGCAAACCGTTCCCAAGTGGGGCCCTTTTCCAATGGGCATGTACAA  
CCCCACCAT-----CTCCAGGCAATGTCTAATACTGGGGTGGGTACC  
CA-----CACCCGTCCCTAATGCCAGTTTCTTGTCTGCAGCTATGGGC  
ATGGGCTGTCACATGGAATATCTCATCTACGCCTCCTTCTCATTCATGGG  
ATGTTTACAAATCAGTGATGGGTGCAATATCGTCAACCTGCTGGCCAGTA  
ACTCTCCGAGTGTTCGTATGCTCTGACCCAGCAGAAATACTTCAGTAAC  
TACAGTCTGTGATCGGGTTTTACATTTACGAGCCATCGAGTACTGGAA  
CTCCACGGTGCAGGAGCACCTGAAGACCCTGAGTCATGGCTTTAACAAGA  
TCTCCTGGATGGACAACTTTTTCCACTACCTGCGGGTGGTCAACGTCAGT  
GCGTCAACAAAGAGCGACTTCATCTCCATCCTGAAAGGCTCCTTCTGCG  
CAGCCCGGAGTACCAGCACTTACCAGGACATCATATTCTCCAAGA---  
ACCGTGAGACTG-----ACGAGTACGATATCATCGCCTCGCGGATGTAC  
TTGGTGGCGCGGACGACCGAGAAGAAGCGCGAGGAGGTGGTGGAGCTTCT  
AGAGAAGCTTCGACCGTTGATGCTAATCAACAGCATCAAGTTCATTGCCT  
TCAATCCCACATTCGTGTTTATGGACCGCTACAGCTCCTCCGTCATCTCG  
CCCATCCTGACCTCAGGCTTCAGTGTGCTCACTATCCTCATCCTCACTTT  
CTTCTGGTCATCAACCCCTTGGGGAACCTTCTGGCTCATCCTCACGGTCA  
CATCCGTGGAGCTGGGTGTCTTGGGTTTGTGAGGGCTTTCACCAGTTGAG  
TGGCAGCCAGCTCTCAAGAATGTGTCCACATCTTGCAATGTTGGCATTAT  
TAATGGGCTCTCTGGATGGGCTTCTCGGTGGATGACACCCCGGCTGACA  
CCATCACTCGGCGGTTTCGCTATGATGTGGCGCTGGTGTGAGCATTAAG  
GATCTGGAGGAGGACATCATGGAGGGGCTGAGAGAGAGCGGGATGGAAGA  
CAGTGCTTGACCTCAGGCTTTACTGTCATGATCAAGGAATGCTGTGATG

GCATGGGCGATGTCAGCGAGAAGCACGGCGGAGGACCAGCCATTCCCGAG  
AAGGCTGTACGTTTCTCTTTTACTGTTATGTCTGTCTCTGTCCGGGCAGA  
GGAGGAGGAG-----GAGGACGTTA  
CCATCTTCACCGAGCCAAGGCCGAACTCGGAGCTGTCCTGTAAGCCCCTT  
TGCTTGATGTTTGTGGATGAGTCAGACCACGAGACACTCACAGCCCTCCT  
GGGGCCTGTAGTTGCAGAGCGTCATGCAATGAAAGAGAGCAGGCTCATCC  
TCTCCATCGGCGGCCCTTCCCTCGCTCCTTCCGCTTCCACTTCAGGGGCACG  
GGATACGATGAGAAGATGGTGCGGGAGATGGAAGGCCTGGAGTCCTCGGG  
GTCCACGTATGTCTGCACTCTGTGTGACTCCAGCCGGGCGAACGCCCTCAC  
AAAACATGGTGCTACACTCCATCACCCGCGGCCATGAAGAGAACC TAGAA  
CGTTATGAAATATGGAGAACCAACCCCTTCTCTGAGTCTGTGGACGAACT  
GCGAGACAGAGTCAAAGGTGTCTCTGCAAAGCCCTTCATGGAGACCACC  
CCACGCTAGATGCGTTGCACTGCGACATTGGCAATGCCACTGAGTTCTAC  
AAAACTTCCAGGACGAGATCGGGGAGGTGTATCAAAAGGT---CAAC--  
-CCCAGCCGGGAGGAAAGACGCAGCTGGAGGGCCGCCCTAGATAAACAGC  
TGAGGAAGAAGATGAAGCTTAAACCGGTAATGAGGATGAATGGGAACTAC  
GCCCCGAGGCTAATGACCCTGGAGACTGTGGAGGTGGTGTGTGAACTGGT  
GCCCTCAGAGGAGAGGAGAGAGGCCCTGAGGGAGCTCATGAGGCTCTACC  
TCCAGATGAGGCCTGTGTGGCGCGCCACCTGCCCAGCCAAGGAATGCCCA  
GACCAGCTGTGCCGCTACAGCTTTAACTCGCAGCACTTTGCCGACCTCCT  
CTCCTCTACCTTCAAATACAGGTACAACGAAAAGATCACCAATTACCTGC  
ACAAGACTCTGGCCCATGTGCCTGAAATCATAGAGAGAGATGGATCCATA  
GGAGCCTGGGCCAGTGAGGGGAACGAGTCGGCAAACAAATCGTACACCAT  
TGAGATGGGTCCCTTGGGGCCCCGGTGGAAAGGAGAACCCACAGCCTTTCT  
CCTGCTCCATTGAAGACCCCAAAAACAGACAAAGTTCAAGGGCATCAAG  
ACCTACATTTTCGTACCGGGTACACCCGAGCCACACAGGACGTCTGTCTA  
CAGGCGCTACAAACACTTTGACTGGCTGTACAACCGCTTACTGCACAAGT  
TCACTGTGATCTCCGTGCCTCACCTGCCTGAGAAGCAGGCTACGGGGCGA  
TTTGAGGAAGACTTCATCGAGAAGCGTAAGAGACGACTGATACTGTGGAT  
GAACCACATGACCAGTCAACCAGTCTCTCCAGTACGAAGGCTTTGAGC  
ACTTCTGATGTGCGCTGACGACAAGCAGTGGAACCTGGGAAAGAGGCGG  
GCGGAGAAGGACGAGATGGTGGGCGCCATTTTCATGCTGACACTCCAGAT  
CCCTAACGAGCACCAGGACCTACAGGATGTAGAGGAGCGGGTCGACTCCT  
TCAAGGCCTTTGCTAAAAAATGGATGACAGCGTGATGCAGCTCACACAT  
GTTGCCTCAGAGCTGGTGCCTAAACACCTGGGTGGGTTTCAGGAAGGAGTT  
CCAGCGCTGGGAAATGCCTTCCAGTCTATCAGCCAGGCATTTCATGCTGG  
ACCTCCGCACAGCTCGGACGCCCTCAACAACGCCATCTCCCATNNNNNNGCCACG  
TTCTCAAACCTGACCTCTCTGGGTTTCATCATTGGAGTCGGTGTGGTTGG  
AAACCTCCTGATCTCCATCCTGCTGGTCAAAGACAAGAGCCTGCACCGAG  
CACCTACTATTTCTGCTGGACCTGTGCGCCTCTGATATCCTGCGCTCC  
GCCATCTGCTTCCCCTTTGTCTTACCTCAGTCAAGAATGGATCTGCCTG  
GACCTATGGCACGCTGACCTGCAAAGTGATCGCCTTCTGGGTGTGCTCT  
CCTGTTCCACACGGCGTTCATGCTATTCTGCGTGAGCGTCACTCGCTAC  
CTGGCCATCGCACATCACCGTTTCTACACCAAGAGGCTGACCTTCTGGAC  
CTGTCTGGCTGTCTGTCATGGTGTGGACGTTGTGAGTGGCTATGGCGT  
TCCC GCCGGTGCTAGACGTAGGGACATACTCTTTTATCCGAGAGGAGGAC  
CAGTGCACATTCAGCACCGYTCCTTCAGGGCGAATGATTCGCTGGGCTT  
CATGCTCCTGCTGGCGCTCATYCTCTGGCCACACAGCTGGTTTACCTCA  
AGCTCATCTTYTTYGTCCACGACCGCCGAAAGATGAAGCCTGTCCAGTTC  
GTGCCTGCTGTGACCCAGAACTGGACCTTCCATGGGCCAGGTGCCAGCGG  
GCAGGCAGCGGCCAACTGGCTGGCYGGATTTGGTAGAGGCCCAACCCCGC  
CTACTTTGCTGGGCATCCGGCAGAACAGCAACGCAGCGGGCCGACGGCGT  
CTACTGGTATTGGATGAATTCAAAACAGAGAAGAGGATTAGTAGGATGTT



-----TTCTAGAGAGAAACCTTCATCCACTAACTGCCTTGG  
CATGCTGCTGCTGTCCGATGCTCACCAGTGCACCAAGCTCTCAGAGCTCT  
CCTGGGGCATGTGCCCTCAGCAACTTTCCTGCAATTTGCAAGACAGAGGAC  
TTCTCCAACCTGCCAAAGATATGGTGGTGCAGCTTTTGTACATGAGGA  
GCTAGAGACAGAAGATGAGAGACTGGTTTACGAAGCTGCCCTGAACTGGA  
TCAACTATGACCTGGAAAAGAGGCAC TGCCACCTTCCAGAGCTCCTGAGA  
ACGGTGCCTTGGCCCTGCTGCCGGCCATCTTTCTCATGGAGAACGTTTC  
TACAGAAGAGCTGATCAACGCAAAGCCCAAGAGCAAGGAGCTGGTGGATG  
AAGCCATCCGCTGTAAGCTGAAGATCCTGCAGAACGATGGCGTTGTAAAC  
AGCCCATGTGCTCGACCAAGAAAGACCAGCCATGCACTGTTCTCTGGG  
AGGGCAAACCTTTTATGTGTGACAAGTTGTACCTGGTAGACCAGAAAGCCA  
AAGAGATTATCCCCAAGGCAGACATTCCCAGCCCCAGGAAGGAGTTCAGT  
GCCTGCGCAATTGGCTGTAAGGTGTACATCACAGGTGGAA--GAGGCTC-  
GGAGAACGGTGTCTCCAAAGATGTGTGGGTCTACGACACCGTCCACGAGG  
AATGGTCCAAGGCAGCACCCATGCTCATTGCCAGGTTTGGGCACGGCTCT  
GCTGAGCTGAAACACTGCCTGTACGTGGTTCGGAGGTCACACGGCAGCGAC  
TGGCTGCCTCCCAGCTTCTCCGTCTGGATGAATACATTGTTTTGTTTAGT  
CGTTCAACAACAAGGCTGATACTGAATGAAGCGGAGCTAATCATGGCTCT  
GGCCAGGAGTTCCAGATGAGAGTAGTACAGTGTCTCTGGAGGAACAGT  
CTTTCCCCAGTATCATCCAGGTGATCAGTGGTTCGCTCCATGTTAGTCAGT  
ATGCATGGGGCCCAACTTATCACTTCACTTTTTTCTCCCTAGAGGAGCTGC  
TGTGGTTCGAGCTGTTCCCTTTTGTGTGAACCCAGAGCAGTACACTCCTT  
ACAAAACCTTGGCACCTTCCAGGCATGGACCTCCACTATGTCTCCTGG  
AGGAACACGAAGGAGGAGAACACCATCACCTACCCAGATAGACCCTGGGA  
ACAAGGAGGCATCATTCACCTTGGAGAAGGAGGAGCGGGAGCGAATACTGG  
CGAGCAAAGATGTCCCGAGGCACCTGTGCTGCCGCAACCCAGAGTGGCTC  
TTCCCGATCTACCAGGACACTTTGGTTCGACATCCCTTTCCTTCCCTGGAAGT  
CCTCAA---AGAGGGAATGAAG---ACAAAGCCAGTGTGAAGAA---GT  
CAAAGCCGTCCAGCACAGTCCATCCAGGCCGCGTCAGAGAACCCCAAGTGT  
CAGACCTCAGTACAAACCACTAATGAGGCCAAACTCACAGTGTCTGGCA  
GATCCCCTGGAATCTCAAATACCTCAAGGTGCGAGAGGTGAAGTACGAGG  
TGTGGATCCAGAAGAAGGACGCCAGTAAGGGGACGCTGGAGGATCAAATC  
ATCCAGGCGAACCCAGCGCTGGAGGCCTTCGGCAACGCCAAAACCTGAG  
GAATGACAACCTCGTCCCCTTTTGGAAAATTCATCCGAATTCACTTCGGCA  
CGAGCGGCAAGCTGTCTGTCTGTGACATCGAGACGTACCTCCTGGAGAAG  
TCCCCTGCTCACCTTTCAGCTGAAGGCGGAGAGGAAC TACCACATCTTCTA  
CCAGATCCTGTCCAATCAGAAGCCAGAGCTGCTGGACATGCTGCTGATCA  
CCAACAACCCATACGACTACTCCTACATCTCCCAGGGAGAGGTTACGGTC  
GCCTCCATCAACGACTCCGAGGAGCTGATGGCCACCGACAGCGCCTTTGA  
CGTCTCGGCTTACCTCGGACGAGAAGATGGGCGTCTATAAACTAACCG  
GCGCCATCATGCACTACGGCAACATGAAGTTCAAAACAGAAGCAACGGGAG  
GAGCAGGCAGAGCCAGACGGCACGGAGGCCCGCCGATAAGTCGGCTTATCT  
GATGGGACTGAACTCTGCCGACCTCATCAAGGGTTGTGCCATCCCCGGG  
TCAAGGTCGGCAACGAGTACGTACCAAAGGCCAAAGTGTGGACCAGGTC  
TACTACCCCAACAAGGAGGCCTTCAAGTGTGAGGAGTGTGGGAAGCACTA  
TAACACCAAGCTGGGATATAAGCGCCATGTGGCTATGCACTCTGCCACTG  
CAGGGGACCTCACCTGCAAAGTGTGCATGCAGAGCTACGAGAGCACACCC  
GTGCTTTTGGAGCACCTAAAGAGCCACTCCGGGAAGTCTTCGGGTGGCAC  
CAAGGAGAAAAACACCCGTGCGACCCTGTGACCGTCTGTTTCTACACAC  
GGAAGGATGTGAGGCGGCACATGGTGGTCCACACAGGGCGAAAGGACTTC  
CTCTGCCAGTATTGTGCCAGCGCTTCGGCAGGAAGGATCATCTGACGCG  
CCACGTGAAGAAGAGCCACTCGCAGGAGCTGCTGAAGATCAAGACGGAGC  
CTCCAGATATGTTAGGTCTTCTAGCCTCTGGATCACCACCCTGCTCTGTG

AAGGAGGAGCTCAGCCCATGATGTGCGGCATGGGTCCCAACAAAGACCC  
CATGATGGGCAAACCGTTCCCCAGTGGGGCCCCTTTCCGATGGGCATGT  
ACAACCCCCACCAT-----CTCCAGGCCATGTCTAATTCTGGGGTGGGT  
CACCCA-----CACCCTGCCCTCATGCCAGCCCCTTGTCTGCAGCTAT  
GGGCATGGGCTGTCACATGGAANNNNNNNNNNNNNNCCTCTTTCTCATTCATGGGATGTTTACA  
AATCAGTGATGGATCAAATATCGTAAACCTGCTGGCTAGTAACTCTCCAA  
GTGTTTCGTACGCACTGACCCAGCAGAAATACTTACAGTAATTACAGTCCT  
GTGATTGGGTTTTATATTTACGAGCCCATTGAGTACTGGAATCCACGGT  
GCAAGAGCACCTGAAGACTCTGAGTCATGGCTTCAATAAGATCTCTTGG  
TGGACAACTTTTTCCACTATCTTCGAGTTGTGAATGTGAGTGCATCAACC  
AAGAACGACTTTCATCACCATCCTCAAGGGCTCCTTCCGCGCAGTCCAGA  
GTACCAGCACTTCACTGAGGACATCATATTCTCCAGGA---ACCGGGAGA  
CCG-----ATGAGTATGAGATTATTGCTTACGGATGTACTTGGTTGCA  
CGGACGACAGAGAAGAAGCGAGAAGAGGTGGTGGAGCTTTTAGAAAAGCT  
TCGTCCATTGATGCTGATCAACAGCATCAAGTTCATTCCTTCAATCCCA  
CGTTTGTGTTTTATGGACCGCTACAGCTCCTCTGTCATTTGCGCAAATCCTG  
ACCTCAGGCTTCAGCGTACTCACAAATCCTCATCCTCACTTTTTCGTCTTGT  
CATCAACCCTTTGGGGAACCTTGTGGCTCATCCTCANNNNNNNNNNNNNNNNNNNNNNNNNNNNNN  
NNNGGCTTTACCAGTTT

GAATGGCAGCCAGCTCTCAAGAATGTGTCAACATCTTGCAGTGTGGCAT  
TATTAATGGGCTCTCTGGATGGGCTTCTCTGTGATGACGTTCCAGCTG  
ACACCATCACTCGGGGTTTTGCTATGATGTGGCACTGGTGTGAGCATT  
AAGGATCTGGAGGAGGACATCATGGATGGGCTGAGAGAGAGTGGGATGGA  
AGACAGTGTGACCTCAGGCTTCAGTGTTATGATCAAGGAGTCTGTG  
ACGGTATGGGCGATGTCAGCGAGAAGCACGGTGGAGGACCAGCTGTTCT  
GAGAAGGCTGTACGTTTCTCTTTCAGTGTATGTCATCTCTGTCTGGC  
GGATGAAGAGGAG-----AAAGAGG  
TTACTGTCTTCACTGAGCCGAAAGCCAACTCAGAAGTGTCTGTAAAGCC  
CTTTGCTGATGTTTGTGATGAGTCAGACCATGAGACACTCACAGCCGT  
CCTGGGCGCTATAGTTGCAGAGCGAGATGCTATGAAAGAGAGCAGGCTCA  
TCCTCTCTGTGGGCGGACTCCCTCGCTCCTTCCGCTTCCACTTCAGAGG  
ACAGGATATGATGAGAAGATGGTGCGTGAGATGGAAGGCCTCGAGGCCT  
GGGCTCCACCTATGCTGCACTCTTGTGACTCCACTCGGGCGGAGGCCT  
CTCAAACATGGTGTGCTGCACTCGGTTCACACGTCATGAAGAGAACCTA  
GATCGCTACGAAATATGGAGAACCAACCGTTTTTCTGAGTCTGCGGATGA  
GCTGCGAGACAGAGTCAAAGGGATCTCAGCCAAGCCCTTCTGGAGACCC  
ACCCACGCTGGATGCATTGCACTGCGACATTGGCAACGCAATTGAGTTC  
TACAAAATCTTCCAGGATGAGATTGGCGAGATGTACAAAAAGGT---CAG  
C---CCCAGCCGGGAGGAACGGCGCAGCTGGAGGGCAGCCCTAGATAAAC  
AGCTGAGGAAGAAGATGAAGCTAAAACAGTGTGAGAAATGAATGGGAAC  
TATGCCCGCAGGCTAATGACCCAGGAGACTGTGGAGGTGGTGTGTGAGCT  
GGTACCCACAGAGGACAGAAGGGAGGCCCCTGAGGGAGCTCATGAGGATCT  
ACCTCCAGATGAAACCTGTGTGGCGTGGCACCTGCCCCGCAAGGAGTGC  
CCCGACAGCTGTGCCGCTACAGCTTTAACTCCCAGCGCTTCCGCGACCT  
CCTCGCCTCTACCTTCAAATACCGCTACAATGGAAAGATAACCAATTACC  
TGACAAGACCCTGGCACACGTCCTGAAATCATGAGAAAGATGGATCC  
ATAGGAGCCTGGGCCAGCGAGGGGAACGAGTCAGCAAACAAG-----

-----  
-----  
-----  
-----  
-----  
-----

-----  
-----  
-----  
-----  
-----  
-----  
-----  
-----

-----NNNNNNNNNNNGTT

CCTCAAACCTGACCTCTTTGGGTTTTATCATATCGGAGTCGGTGTGGTTGGAA  
ACCTCCTGATCTCCATCCTGCTGGTCAAAGACAAGAGCCTGCACCGGGCG  
CCCTACTATTTCTGCTGGACCTGTGCGCCTCCGACATCCTGCGCTCCGC  
CATCTGCTTCCCTTTGTCTTACCTCGGTCAAGAATGGATCTGCCGGA  
CCTACGGCACGCTGACCTGCAAAGTGATCGCCTTCCCTGGGTGTGCTCTCC  
TGTTTCCACACGGCGTTTATGCTCTTCTGTGTACAGCGTCACGCGCTACCT  
AGCCATCGCACACCACGTTTTTCTACACAAAAGGCTGACCTTCTGGACCT  
GTCTAGCCGTACATCTGCATGGTGTGGACGTTGTCCGTGGCGATGGCGTTC  
CCGCCGGTGTAGACGTAGGGACGTA CTCTTTTATCCGGGAGGAGGACCA  
GTGCACGTTCCAGCACCGTTCTTTTACAGGGCGAATGATTCGCTGGGCTTCA  
TGCTCCTGCTGGCGCTCATCCTCCTGGCCACACAGCTGGTTTACCTCAAG  
CTCATCTTCTTCTGTCACGACCGCTCGAAAGATGAAGCCTGTCCAGTTCGT  
GCCTGCTGTACGCCAGA ACTGGACCTTCCACGGGCCAGNNNNNNNNNNNNNNNNNNNN  
NNNNNNNNNNNNNNNNNNTGGCCGCCGCC  
TGCCCTGCTGGGCATCCGGCAGAACAGCAACGCAGCGGGCCGTAGGCGTC  
TACTGGTATTGGATGAATTCAAAACAGAGAAGAGGATTAGTAGGATGTTT  
TACATCATGACGTTTTTCTTCTGCGGCTGTGGGGCCCTATCTGGTTGC  
CTGCTACTGGCGGGGTGTTTTGCCAGGGACCACAGGGCCCCTGGGGGTACC  
TGACGGCAGCCGTGTGGATGAGCTTGCCCAAGCTGGGGTCAATCCTTTNNNNNNNNNNNNNNNNNN  
NNNG  
CCAAATCTCGCTTTCACCCCTGGCGTGGGGACTGGTCCTGGCACGGAGC--  
-GCAGCGTCCCACCTCGGCAACAGCTTGCTGTCCCCGACGCAAAGCGACGA  
GCCCACTGTTGCCACCCCCCGCAGCGATGGTTTGTACCC---CTGCCA  
ACAACCGACTGGACTTTGCTGCCTCGGCATACGACGCCGCT-----  
GATTCGCCCGTAACCGCGCCACCTTGCTGTCTACGCAGCGCCGGAGT  
GAAGGCTC-----TTCCCCTGCCGACTGCAGGCTGCTCCAACCGGCTC  
TTGGCTATTACGCAGACCCTTCGG--GCTGG---GGAGGACGCACGCCG  
CCGCAGTACTGTGGCGTTAACAGCAAATCCAGCTCGGTCTTTTCTGCTG  
GCCCCTA ACTCTCTGGGTGGCAGAGCGAGCA---CC---A ACTACCTGG  
-----CTGAAGA---GGGG---GACTC---CATCCCGACGGAGAGG  
TCCCC---AT---CGGAGGCTCGGAGGAG---ACCAAACCAAAGACAT  
GAC---TTCAGA---GTCGAGCTGGATAGAG---ACGCCGTCTCCATTA  
AGTCCATCGACTCGAGCGATTCTGGGATCTTTG---AACAGGCCAAGAGG  
AGGAGAATCTCACCTTCTGCCACGCCG-----GTTTCAGAGACAGT  
GTCCCCGTAAAATCCGAGCATCACTCAACAGGCGAAGTACAGAGAGAG  
AAGTGGCGTTGGGGATAAATCCGTTCGCGGATGGGATGGGCGCCTTCAA  
ATAAACCACAGCTCCACGATATTGGCTCCGG---ACAGACAGCGTTTTTC  
CTCCAGGCG---CCCGGTAC---GCAGCTGCCGCCCTGGGA---CACC  
ATCA-----CCACCCGACCCACGTTGGCTCT---TACTCCACAGCGGCT  
TTCAACTCCACAGGGACTTTCTGTTCAGAAATCGGGGTTTTGGAGACGC  
CACCGG-----GGCGCAGCACAGTTTGTTCGCCTC-----  
-CGGAAGTTT---C-----GCAGGGCCACATGGACTCAGATGCAGCG  
GGGCACCTGCTCTTCCAGGGCTCCACGAG---CAAGCGCGAGCCATGC  
GTCTTCCAACGTGGTCAACAGCCAGATGCGGCTGGGCTTCTCGGGGGACA  
TGTAACGGACGCGCCGACCAGTACGGCCACGTTACGAGCCCGCGGT---CC

GACCACTACGCTTCGACCCAGCTGCACGGCTACGGCCCCATGAACATGAA  
TATGGCCGCG---CACCACGGAGCTGGGGCCTTCTTTCGATACATGAGGC  
AGCCGATCAAGCAAGAGCTCATCTGCAAGTGGATCGAGCCGGAGCAGCTG  
ACGAACCCCAAAAAGTCGTGCAACAAAACCTTTTAGCACGATGCACGAGCT  
CGTGACCCATCTGACKGTGGAGCATGTGGGGGGACCGGAGCAGACCAACC  
ACATCTGCTTCTGGGAGGACTGCGCCAGAGAAGGAAAGCCATTCAAAGCC  
AAATACAAACTTGTAATCATATCAGAGTACACACCGGAGAAAAGCCCTT  
TCCGTGTCCGTTCCCCGGCTGTGGCAAA

>*Siganus spinus*

AGCCTACTGATTTCGAGCAGAACTTAGCCAACCAGGCGCTCTTCTTGGAGA  
CGACCAAATTTATAATGTTATTGTTACCGCCCATGCATTTCGTAATGATTT  
TCTTTATAGTAATGCCAATTATGATTGGAGGGTTTGGAACTGACTAATC  
CCGCTAATGATCGGAGCCCTGACATGGCATTCCCCCGAATGAACAACAT  
GAGCTTCTGACTCCTTCCCCCATCCTTCCTGCTTCTCCTGGCCTCCTCTG  
GAGTAGAAGCTGGGGCGGGTACTGGTTGAACTGTCTACCCCCCTCTAGCC  
GGAAACCTAGCACACGCTGGTGCATCCGTTGACCTAACTATTTTCTCCCT  
TCACTTAGCTGGTATTTCCCTCAATTCAGGGGCCATCAATTTTATTACAA  
CCATTATTAACATGAAACCTCCCGCTATTTCCCAATATCAGACCCCTCTG  
TTTGTATGGGCCGTCCTAATTACAGCTGTCCTGCTACTTCTCTCCCTGCC  
TGTAAGTAGCCGCTGGAATTACAATGCTCCTAACAGACCGAAATTTAAATA  
CTACCTTCTTTGACCCCGCAGGAGGAGGTGACCCAATCCTGTACCAACAC  
CTG-----  
-----  
-----  
-----

-----NNNCTCGAGAGAAACCTTCATCCATCCAACCTGTCTTGGCAT  
GCTGCTGCTGTGCGGACGCCACCAGTGCACCAAGCTGTCAGAGCTCTCCT  
GGGGCATGTGCCTCAGCAACTTTCTGCCATTTGCAAGACAGAGGACTTC  
CTCCAACCTGCCAAAGACATGGTGGTGCAACTCTTGTGCGATGAGGAGCT  
AGAGACTGAAGACGAAAGACTAGTTTATGAAGCTGCACTCAACTGGATCA  
ACTATGACTTGGAAAAGAGGCATTGCCACCTTCCCTGAACTCCTAAGAACA  
GTCCGCTTGGCCTTGCTCCCCGCCATCTTTCTCATGGAGAATGTGTCCAC  
AGAAGAGCTGATCAATGCTCAGGCCAAAAGCAAGGAGCTGGTGGATGAAG  
CTATYCACTGTAAGCTGAAGATCCTGCAGAATGATGGCGTCGTCAACAGC  
CCGTGTGCCCCGTCCCAGAAAACCAGTCATGCTCTCTTTCTCCTTGGTGG  
GCAGACTTTCATGTGTGACAAGTTGTACCTGGTCGACCAGAAAAGCCAAAG  
AGATCATCCCCAAGGCGGACATTCCAGCCCGAGGAAGGAGTTCAGCGCC  
TGTGCCATCGGCTGTAAAGTATACATCACTGGTGGAA--GAGGCTC-GGA  
GAATGGGGTGTCCAAAGATGTGTGGGTCTATGACACCGTCCACGAGGAAT  
GGTCAAAGGCGGCACCTATGCTCATGTCAGGTTCCGGTCACGGTTCGCA  
GAACTCAAACACTGTCTGTACGTGGTAGGCGGTCACTGTCAGCTACTGG  
CTGCCTTCCAGCCTCTCCATCGGGATGAGTACATGTTGGTTTTTTAGTCGT  
TCAACAACAAGGCTAATACTGAATGAACCAGAGCTCATCATGGCACTGGC  
ACAGGAGTTCAGATGAAAGTGCATCACAGTGTCCCTTGAGGACCAAACCTC  
TCCCCAGCATTGTCCAGGTGATCAGTGGTGGCACCATGTTGGTCAGTATG  
CATGGAGCTCAGCTCATCACCTCACTCTTCTCCTCCCCAGAGGAGCGGTTGT  
GGTGGAGCTGTTCCCTTTTGTGCTGTAAACCCTGAGCAGTACACTCCATATA  
AAACACTTGCTTCCCTACCAGGCATGGACCTGCACTATATCTCCTGGAGG  
AACAAAAGGAGGAGAACACCATCACACACCCAGACAGAACCTGGCAACA  
AGGAGGGATCAGTCACCTGGGGAAGGATGAGCAAGAGCGAATACTGGCAA  
GCAAGGATGTCCCCAGGCATCTGTGCTGCCGCAACCCGGAGTGGCTCTTC  
CGCATTTACCAGGACACTTTAGTGGACATCCCTTCATTGCTGGAGGTTCT  
TAA---AGAGGGCATGAAG---GCAAAGCCCAATTTAAAAA---GTCCA

AACTTGCAAGCACACTCCACCCAGGCCGTGTCAGGGAACCTCAGTGTCAA  
ACGTCAGTACACGCAACGAATGAGGCTAAACTCACAGTCTCCTGGCAGAT  
CCCCTGGAATCTGAAATACCTANNNNNNNNNNNNNNNNNNNNNNNNNNNNNNNNNNAAGAAAGACAAC  
AGCAAGGGGACCCTGG  
AGGACCAGATCATCCAGGCCAACCCGGCACTCGAGGCTTTCGGCAACGCC  
AAAACCCTCAGGAACGACAACCTCGTCGCGCTTCGGAAAGTTCATCCGAAT  
CCACTTCGGCACGAGCGGCAAGCTCTCGTCTGCTGACATCGAGACCTACC  
TGCTGGAGAAGTCTCGAGTCACCTTTCAGCTCAAGGCTGAGAGAACTAC  
CACATCTTCTACCAGATCCTGTCCAATCAGAAGCCAGAGCTGCTGGACAT  
GCTGCTGATCACCAACAACCCCTACGACTACTCCTACATCTCCCAGGGGG  
AGGTGACCGTGGCGTCCATCAACGATGCCGAGGAGCTGATGGCCACGGAC  
AGCGCCTTCGACGTGCTCGGCTTCACCCCGATGAGAAGATGGGCGTCTA  
CAAGCTGACCGGCGCCATCATGCACTACGGCAACATGAAGTTC AAGCAGA  
AGCAGCGGAGGAGCAAGCCGAGCCGGACGGCACCCGAGGCGGCCGACAAA  
TCGGCCTACCTGATGGGCCTGAACTCTGCCGACCTCATCAAGGGACTGTG  
CCATCCCAGGGTCAAGGTGGGCAACGAGTACGTACCAAAGGCCAGAGCG  
TGGACCAGGTCTACTACCCCAACAAGGAGGCCTTCAAGTGTGAGGAGTGC  
GGCAAGCACTACAACACCAAGTTGGGCTATAAGCGCCATGTGGCCATGCA  
CTCTGCCACAGCAGGGGACCTCACCTGTAAAGTGTGCATGCAGACCTATG  
AGAGCAGCCTGTGCTCCTGGAGCATCTCAAGAGCCACTCTGGGAAGTCC  
TCCGGCGGCACCAAGGAGAAGAAACACCCGTGCGACCATTGCGACCGTCCG  
TTTTCTACACACGCAAGGATGTGAGGCGTCACATGGTGGTCCACACTGGCC  
GGAAGGACTTCTGTGCCAGTACTGTGCCAGCGCTTGGCAGGAAAGAC  
CACCTGACGCGCCACGTGAAGAAAAGCCACTCACAGGAGCTGCTCAAAT  
CAAGACGGAGCCTCCAGACATGCTCGGCCTGTTAGCTTCAGGATCACCGC  
CTTGCTCTGTGAAAGAAGAGCTCAGCCCTATGATGTGTGGCATGGGTTCC  
AACAAGGACCCCATGATGGGCAAACCGTTCGCCAGCGGGCCGCTTTCC  
CATGGGCATGTACAACCCCAACCAT-----CTTCAGGCCATGTCCAATT  
CCAGCGTGGGCCACCCCT-----CATCCCTCCCTGATGCCCACTTCCTTG  
TCTGCAGCTATGGGCATGGGCTGTCACATGGAANNNNNNNNNNNNNNNNNNNNNNNNNNNNNNNNNNNNNNATGTT  
TACAGATCAGTG  
ATGGATCAAATATCGTCAACCTGCTGGCGAGTAACTCTCCGAGTGTTC  
TATGCTTTGACTCAGCAAAAGTACTTCAGCAACTACAGTCTCCTGTGATTGG  
GTTTTACATTTATGAGCCCATAGAGTACTGGAACCTCACGGTGCAGGAGC  
ACCTGAAGACTCTGAGTCATGGCTTCAACAAGATCTCCTGGATGGACAAC  
TTTTTCCACTACCTGCGGGTGGTGAATGTGAGCGCATCAACCAAGAGCGA  
CTTCATCACCATCCTGAAGGGCTCCTTCCTACGCAGCCCGGAGTACCAGC  
ACTTCACCGAGGACATCATCTTCACCAAGA---ACCGCGAGACCG-----  
-ACGAGTACGACATCATCGCCTCGCGAATGTATTTGGTGGCGCGGACCAC  
AGAGAAGAAACGCGAGGAGGTGGTGGAACTTCTGGAAAAGCTTCGTCCTT  
TGATGCTCATCAACAGCATCAAGTTCATTGCCTTCAATCCTACGTTTCGTG  
TTCATGGACCGCTACAGCTCCTCTGTTATCTCGCCATCCTGACCTCAGG  
ATTCAGCGTCTCACATCCTCATCTCACTNNNNNNNNNNNNNNNNNNNNNNNNNNNNNNNNNNNNNNNNNNNNNN  
NNNNNNNNNNNNNNNNNNNNNNNNNNNNNNNNNNNNNNNNNNNNNNNGGCTTTCACCAGTTTGAAT  
GGCAGCCAGCTCTTAAGAATGTGTCTACATCTTGAACGTTGGCATTTATT  
AATGGGCTCTCTGGATGGACTTCTCGCTGGATGACGCCCCTTCTGACAC  
CATCACTCGGCGGTTCGCTATGATGTGGCACTGGTGGCAGCAATAAAGG  
ATCTGGAGGAGGACATCATGGAGGGGCTGAGAGAGAACGGGATGGAAGAC  
AGTGCTTGCACCTCCGGCTTCAGTGTGTCATGATCAAGGAGTCTTGTGACGG  
CATGGGCGATGTGAGTGAAGCATGGTGGAGGACCGGCTGTTCCCTGAGA  
AAGCTGTGCGTTTCTCTTTCAGTGTGTCATGTCTGTCTCCATTGTGACAGAT  
AGTGCAGAG-----AAAGAGGTTAC  
TATTTTCAGGGAGGCTAAACCAAACCTCAGAAGTGTCTGTAAGCCCCTTA



GCCTCATGTTTGTGGATGAGTCCGACCATGAGACACTCACAGCCATCCTG  
TGGCCTGTTGTGCGCAGAGCGTAATCAATAAAAAGAGAGCCGCCTCATCAT  
ATCCATAGGTGGCCTGGCGCGGTCTTCCGCTTTCACCTCAGAGGTACAG  
GATATGATGAGAAAATGGTCAGAGAGATGGAAGGCCTTGAGGCCTCTGGG  
TCCACATATGTGTGCACTCTTTGCGACTCCAGTCGGGCAGAAGCTGCTCA  
AAACATGGTGTGCTGCACTCGATCACACGCAGTCACGAAGAGAACCTGGAGC  
GTTACGAAATATGGAGAACGAACCCCTTTTCTGAACTGTCAGACGAACTG  
CGAGACAGAGTCAAAGGGGTTTCTGCCAAGCCCTTTTGGAAACCCACCC  
AACTCTTGATGCTTTACACTGTGACATTGGCAATGCCACAGAGTCTACA  
AAATCTTCCAGGATGAGATCGGGGAGGTGTATCAAAAGGT---CAGT---  
CCCAGCCGGGAGGAACGGCGCAGCTGGAGGGCAGCCCTAGATAAACAGCT  
GAGGAAGAAGATGAAGCTCAAACCAGTAATGAGGATGAATGGGAACATG  
CACGGCGGCTAATGACCCAGGAGACAGTGGAGGTGGTGTGTGAGCTGGTG  
CCCTCAGAGGAGAGGGAGGGAGGCCCTTGAGGGAGCTTATGAGGCTTTATCT  
CCAGATGAAGCCTGTGTGGCGTGCCACCTGCCAGCCAAGGAATGCCCCG  
ACCAGCTGTGCCGCTACAGCTTCAACTCCCAGCGCTTTGCTGACCTCCTC  
GCCTCTACCTTCAAAATATAGGTACAATGGAAAGATAACCAATTACCTGCA  
CAAGACCCTGGCTCATGTGCCTGAAATCATAGAGAGGGATGGATCCATAG  
GAGCATGGGCCAGCGAGGGGAACGAGTCGGCAAACAAATCCTACACCATT  
GAGATGGGTCCCTTGGGACCTAAATGGAAGCAGAGCCACAACCTTTCTC  
CTGCTCCATTGAAGACCCAACAAAACAGACCAAGTTCAAAGGTATCAAGA  
CGTACATTTTCATACCGGCTCACGCCAAGTCACACCGCCACGCTGTCTAT  
CGACGCTACAAACACTTCGACTGGCTGTACAACCGCTTACTGCACAAGTT  
CACTGTTATCTCCGTGCCTCACCTGCCGAGAAGCAGGCCACTGGGCGCT  
TTGAGGAAGACTTCATCGAGAAGCGCAAGAGGCGACTGATACTGTGGATG  
AACCACATGACCAGTCACCCCGTCTCTCCAGTATGAAGGCTTCGAGCA  
CTTTTTGATGTGTGCTGATGACAAGCAGTGAAGCTAGGCAAGAGACGGG  
CAGAGAAGGACGAGATGGTCGGCGCCCATTTTATGCTGACACTGCAGATC  
CCTAACGAGCACCAGGATCTTCAGGACGTCGAGGAGCGGATCGACTCCTT  
CAAATCATTTGCCAAGAAAATGGATGACAGTGTGATGCAGCTCACACATG  
TTGCCCTCGGAGCTGGTGCCTAAGCACCTGGGTGGATTTCAGGAAGGAGTTC  
CAGCGACTAGGTAAATTCATTCCAGTCCATCAGCCAGGCTTTCATGCTGGA  
CCCTCCCCACAGCTCAGAGGCCCTNNNNNNNNNNNNNNNNNNNNNNNNNNNN  
NNNTGGGTTTCATTATTGGAGTTGGGGTGG  
TCGGAAACCTCCTGATCTCCATCCTGCTGGTCAAAGACAAGAGCCTGCAT  
CGAGCACCCTACTATTTCTACTGGACCTGTGCGCCTCTGACATCCTGCG  
CTCAGCCATTTGCTTCCCCTTTGTCTTACCTCAGTCAAGAATGGCTCTG  
CCTGGACCTATGGCACGTTGACCTGTAAAGTGATCGCCTTCTGCGGTGTG  
CTCTCCTGTTTCCACACGGCGTTTATGCTCTTCTGTGTTAGCGTCACGCG  
CTACCTGGCCATCGCTCACCACCGTTTCTACACCAAGAGGCTGACCTTCT  
GGACCTGTCTCGCTGTCATTTGCATGGTGTGGACGTTGTGCGGTGGCCATG  
GCGTTCGCCAGTGCTAGACGTAGGGACGTACTCTTTTATCCGGGAGGA  
GGACCAGTGCACGTTCCAGCACCCTTCCCTCAGGGCCAATGATTCATTGG  
GCTTCATGCTCTTGTGGCGCTCATCCTCCTGGCCACACAGCTGGTTTAC  
CTCAAGCTCATCTTCTTTCGTCCACGACCGCCGAAAGATGAAGCCAGTCCA  
GTTTCGTGCCTGCCGTCAGCCAGAACTGGACCTTCCACGGACCAGGTGCCA  
GCGGGCAGGCGGCGGCTAACTGGCTGGCTGGATTTCGGTCGAGGCCCCACC  
CCACCTACTCTGCTGGGCATCCGGCAGAATAGCAACGCAGCGGGCCGCAG  
GCGTCTATTGGTGTGGATGAATTCAAAACGGAGAAGAGGATTAGTAGGA  
TGTTCTACATCATGACGTTTTTCTTCCCTGGCATTGTGGGGGCCCTATCTG  
GTGGCCTGCTACTGGCGGGTGTTCGCAAGGGGCCAGTGGTCCCTGGGGG  
TTACNNNNNNNNNNNNNNNNNNNNNNNNNNNNNNNNNNNNNNNNNNNNNN  
NNNNNNNNNNNNNNNNNNNTTTCACCCTGGCATGGGGACTGGTCCCTGGCACGGAGC---GCAGCC



TGGAGAGGCGCCACTGCCACCTGGCCGAGCTGCTGAGGACGGTCCGCCTG  
GCGCTGCTGCCCGCCATCTTCCTGATGGAGAACGTGTCGACGGAGGAGCT  
GATCAACGCCCAGGTCAAGAGCAAGGAGCTGGTGGACGAGGCCATCCGCT  
GCAAGCTGAAGATCCTGCAGAACGACGGCGTGGTCAACAGCCCGTGCGCC  
CGCCCCGCAAGACCAGCCACGCCCTCTTCCTGCTGGGCGGACAGACCTT  
CATGTGCGACAAGCTGTACCTGGTGGACCAGAAGGCCAAAGAGATCATCC  
CCAAGGCGGACATCCCCAGCCCCAGGAAGGAGTTCAGCGCCTGCGCCATC  
GGCTGCAAGGTCTACGTACCGGGGGGC--GGGGCTC-GGAGAACGGCGT  
GTCCAAAGACGTGTGGGTGTACGACACCGTCCAGGAGGAGTGGTCCAAGG  
CGGCGCCCATGCTCATCGCCCGGTCGGCCACGGCTCGGCCGAGCTGAAA  
CACTGCCTCTACGTGGTGGGAGGGCATA CGGCCGCCACCGGCTGCCTCNNNNNNNNNNNNNNN--  
-----CCAGGCTGATCCTCAAC  
GAGGCCGAGTTGATCTTGGCGTTGGCGCAGGAGTTCAGATGAGGGTGGT  
GACGGTGTCTCTGGAGGACCAGACCTTCTCCAGCATCGTGCAGGTGGTCA  
GCGGCGCCGCCATGCTGGTGTAGTATGCACGGAGCACAGCTGGTACCTCT  
CTCTTCCTCCCCAGAGGAGCGGCTGTGGTAGAACTCTTCCCCTACGCGGT  
CAACCCCGAACAGTACACCCCTTACAAGACCTTGGCCACCTTGCCGGGCA  
TGGACCTCCAGTACGCTGCCTGGAGGAACACCATGGAGAAAACCACTGTG  
GCCTACACTAAAAGACCCTGGGACCAAGGGGGTATCGCCCATCTCGACCA  
GGACGAGCAGGAGCGCATCCTGGCCAGCAGCGAGGTTCCCAGGCACCTGT  
GCTGCCGAAACCCCGAGTGGCTCTTCCGCATTTACCAGGACACCACAGTG  
GACGTCCCCTCCCTACTGGAGGTGCTGAG---GCAGAGTCTGAAG---AG  
CACGCCAGCTTGAAGAA---GAGCAAGGCTGCCAGCACCGTCCATCCGG  
GGAGGGTCAGGGAGCCCCATTGCCAGACCTCGGTCCAGGCCACTAACGAA  
GCCAAGCTCACAGTGCCT-----  
-----AAGAGGGATGCCAGCA  
AGGGAACCTTGGAGGATCAAATCATCCAGGCCAACCTGCCCTGGAGGCT  
TTTGGTAATGCCAAAACACTGAGAAATGACAACATCATCACGCTTTGGCAA  
ATTCATCCGGATTCACTTTTGAACCAGCGGCAAGCTGTCCTCTGCAGACG  
TAGAGACTTACCTTCTGGAAGAGTGCCTGTACCTTTTCAGCTCAAAGCA  
GAGAGGAACTACCACATCTTCTTCCAGATCTTGTCCAATCACAAGCCAGA  
GCTGTTGGACATGCTTTTGTATACCAACAATCCATACGACTACTCCTACA  
TCTCCCAAGGAGAGGTAACAGTAGCATCCATCAATGATTCTGAGGAGTTG  
ATAGCCACCGACAGTGCNTTCGATGTGCTTGGCTTTACTCAGGAGGAGAAA  
ATGGGGGTCTACAAGTTGACAGGTGCAATCATGCAYTACGGCAACATGAG  
GTTCAAGCAAAGCAGCGTGAGGAGCAGGCTGAGCCTGACGGCACTGAGG  
CTGCTGACAAGTCAGCTTATCTAATGGGGCTGAACTCTGCAGATCTCGTG  
AAAGGACTCTGCCATCCCAGGGTTAAGGTTGGCAATGAGTATGTCACTAA  
AGGTCAGGGTGTAGACCAAGTCTACTACCCCAACAAGGAGGCCTTCAAGT  
GCGAGGAGTGTGGCAAGCACTACAACACCAAGCTGGGCTACAAGCGCCAT  
GTGGCCATGCACTCGGCCACGGCAGGTGACCTCACCTGCAAGGTGTGCCT  
GCAGAGCTACGAGAGCACGCCGGCCCTCCTGGAGCACCTGAAGAGCCACT  
CCGGGAAGTCTCGGGCGGCGCCAAGGAGAAGAAGCACCCGTGCGACCAC  
TGCGACCGCCGCTTCTACACGCGCAAGGACGTCAGACGCCACATGGTGGT  
GCACACCGGCCGCAAGGACTTCCCTGTGCCAGTACTGCGCCAGCGCTTTG  
GCAGGAAGGACCATCTGACACGGCACGTGAAGAAGAGCCACTCGCAGGAG  
CTGCTGAAGATCAAGGCGGAGCCTCCGGACATGCTGGGGCTGCTGGGGTC  
CGGCTCGCCGCCCTGCTCTGTCAAAGAGGAGCTCAGCCCCATGATGTGCA  
GCATGGGTCCCTCCAAGGACCCCTGATGGCCAAGCCTTTCCCAGCGGG  
ACCCCTTCCCCTATGGGCATGTACAACCCCAACCAC-----TTGCAGGC  
CATGTCCGGCCCTGGGGGGGCCAC-----CACCCCTCCCTGATGC  
CCGGCTCCCTGTCTGCGGCTATGGGCATGGGCTGCCACATGGAC-----  
-----







TACGAGCGGCAAACCTTTCATCTGCTGACATCGAGACATACCTGCTGGAGA  
AGTCACGTGTCACCTTTCAGCTCAAGGCTGAGAGGAACTATCACATCTTC  
TACCAGATCTTGTCCAATCAGAAGCCAGAGCTGTTGGACATGCTGCTGAT  
CACCAACAACCCGTATGACTACTCCTACATCTCCCAAGGAGAGGTAACAG  
TCGCCTCTATCAATGACTCAGAGGAGCTGATGGCCACCGACAGTGCCTTC  
GATGTACTTGGCTTCACTCCAGAGGAGAAAATGGCCGTCTATAAACTGAC  
CGGTGCCATCATGCACTACGGCAACTTGAAATTCAAACAGAAGCAGCGTG  
AGGAGCAGGCGGAGCCTGACGGGACGGAGGCTGCTGATAAATCAGCCTAC  
CTAATGGGGCTGAACTCTGCTGACCTCATCAAAGGTCTGTGCCACCCAG  
AGTCAAGGTAGGAAAATGAATATGTCACCAAAGGCCAAAGTGTGGACCAGG  
TCTACTATNNNNNNNNNNNNNNNNNNNNNNNNNNNNNNNNNGGAAGCACTACAACACCAAGCTGGGATA  
TAAGCGCCATGTGG  
CCATGCACTCTGCCACGGCAGGGGATCTCACCTGTAAAGTTTGCATGCAG  
AGCTACGAGAGTACACCTGTTCTCCTCGAGCACCTCAAGAGCCACTCCGG  
GAAGTCTTCGGGTGGCGCCAAGGAAAAAAAACACCCATGCGACCACTGTG  
ACCGTCGTTTCTACACGCGGAAGGATGTGAGAAGGCACATGGTGGTCCAC  
ACGGGCCGAAAGGACTTTCCTGTGCCAGTACTGTGCCAGCGCTTTGGCAG  
GAAGGACCACCTGACACGCCATGTGAAGAAGAGCCACTCGCAGGAGCTGC  
TGAAGATCAAGACGGAGCCTCCGGACATGTTAGGTCTTTTAGCTTCTGGA  
TCGCCACCTTGCTCTGTGAAGGAGGAGCTCAGCCCCATGATGTGTGGCAT  
GGGTCCCAACAAAGACCCCATGATGGGCAAACCGTTCCCCAGTGGGGCC  
CTTTTCCAATGGGCATGTACAACCCCCACCAT-----CTCCAGGCGATG  
TCTAACACTGGGGTGGGTACCCA-----CACCCGTCCCTAATGCCAG  
TTCCCTGTCTGCAGCTATGGGCATGNNNNNNNNNNNNNNNTATCTCATCTACGCCTCTTTCTCA  
TTCATGGGATGTTTACAAATCAGTGATGGATCAAATATTGTCAACCTGCT  
GGCTAGTAATTCTCCAAGTGTTCGTATGCTCTGACCCAGCAGAAATACT  
TCAGTAACTACAGTCTGTAAATGGGTTTTACATTTACGAGCCCATTGAA  
TACTGGAACCTCACAGTGCAGGAGCATCTGAAAACCTCTGAGTCATGGCTT  
CAACAAGATCTCCTGGATGGACAACCTTTTTCCACTACCTGCGGGTGGTGA  
ATGTGAGTGCATCAACCAAGAGCGACTTCATTACCATCCTCAAAGGCTCC  
TTCCCTACGCAGCCAGAGTACCAGCACTTCACTGAGGACATCATATTCTC  
CAAGA---ACCGCGAGACTG-----ACGAGTATGATATTATTGCCTCAC  
GGATGTACTTGGTGGCACGGACGACTGAGAAGAAACGTGAGGAGGTGGTG  
GAGCTTCTGGAAAAGCTTCGTCCATTGATGCTAATCAACAGCATCAAGTT  
CATTGCCTTCAATCCACATTTGTGTTTCATGGACCGCTACAGCTCCTCCG  
TCATCTACCCATCCTGACCTCAGGCTTCAGTGTACTCACTATCCTCATC  
CTCACTTTCTTCTGGTCAATCAACCCCTTGGGGAACCTTCTGGCTCATCCT  
CACGGTTACATCTGTGGAGCTGGGTGTTTTGGGTTTGATGNNNNNNNNNNNNNNNNNNNNNNNNNNN  
NNNNNNNNNNNNNNNNNNNTCTTGCAACG  
TTGGCATTATTAATGGGCTCTCTGGATGGGCTTCCCTCGGTGGATGACGCC  
CCGGCTGACACCATCACTCGGCGGTTTCGCTATGATGTGGCACTGGTGTG  
AGCATTAAGGATCTGGAGGAGGACATTATGGAGGGGCTGAGAGAGAGTG  
GGATGGAAGACAGCGCTTGCACCTCAGGCTTTACTGTCATGATCAAGGAG  
TGCTGCGATGGCATGGGCGACGTCAGCGAGAAGCACGGCGGAGGACCCGT  
TGTTCCCGAGAAGGCTGTGCGTTTTCTTTTACCATTATGTCTGTCTCTG  
TCCTGGCAGATGACAAGGG-----  
GAGGAGGTTACCATCTTACCAGCCGAAGCCAAACTCAGAGCTGTCCTG  
TAAGCCCCTTTGCCTGATGTTTGTGGATGAGTCAGACCATGAGACACTAA  
CAGCCGTCTGGGGCCTATAGTCGCGGAGCGTAACGCGATGAAAAGAGAGC  
AGGCTCATCCTATCTCTGGGTGGCCTGCCACGCTCCTTCCGCTTCCACTT  
CAGGGGCACGGGTACGATGAGAAGATGGTGGGAGAGATGGAGGGACTGG  
AGGCTCGGGATCCATGTACATCTGCACTCTGTGCGACTCCAGCCGGGCG  
GAGGCTCTGAAAACATGGTGTGCACTCCATCACCCGCTCTCACGATGA

GAACCTAGAACGTTACGAAATATGGCGAACCAACCCCTTCTCCGAGTCTG  
TGGATGAGCTGCGAGACAGAGTCAAAGGGGTCTCCGCCAAGCCCTTCATG  
GAGACCAGCCCATGCTAGATGCATTGCACTGTGACATCGGCAATGCCAC  
TGAGTTCTACAAAATCTTCCAGGATGAGATCGGAGAGGTGTACCAAAGG  
T---CAAT---CCCAGCCGGGAGGAGCGGCGCAGCTGGAGGGCAGCGCTA  
GATAAACAGTTGAGGAAGAAGATGAAGCTCAAACCGGTAATGAGGATGAA  
TGGGAACTACGCCCGCAGGCTAATGACCCTGGAGGCTGTGGAGGTGGTGT  
GCGAGCTGGTGCCCTCGGAGGAAAGGAGGGAGGCCCTGAGGGAGCTTATG  
AGGCTCTACCTCCAGATGAGGCCCGTGTGGCGGCCACCTGCCAGCCAA  
AGAATGCCCTGACCAGCTGTGCCGCTACAGCTTCAACTCCCAGCACTTTG  
CCGACCTCCTCTCCTCTACCTTCAAATACAGGTACAACGAAAGATAACC  
AATTACCTTCAAAAGACCTTGGCCACGTGCCCGAAATCATAGAAGAGAG  
TNNNNNNNNNNNNNNNNNNNNNNNNNNNNNNNNNNNNNNNNNNNNNNNTCGTACACCATTGAGATGGGT  
CCCCTGGGGCCCCGGTGAAGGAGAACC  
CACAGCCTTTTCTGCTGCTCCATTGAAGACCCACAAAACAGACAAAAGTAC  
AAGGGCATCAAGACCTACATTTTCGTATAGGGTCACGCCGAGCCACACAGG  
GCGTCCCGTCTACAGACGTTACAAACACTTTGACTGGCTGTACAACCGCT  
TACTGCACAAGTTCACTGTGATCTCCGTGCCTCACCTGCCTGAGAAGCAG  
GCCACAGGGCGATTTGAGGAAGACTTCATAGAGAAACGTAAGAGACGACT  
GATACTGTGGATGAACCACATGACCAGTCACCCAGTCCTCTCCCAGTATG  
AGGGCTTTGAGCACTTTCTGATGTGTGCTGACGACAAGCAGTGGAAACTG  
GGAAAGAGACGGGCAGAGAAGGACGAGATGGTGGGCGCCATTTTCATGCT  
GACCTGCGAGATCCCTAACGAGCACCAGGACCTTCAGGATGTCGAAGAGC  
GGGTGACTCCTTCAAGGCCCTTTGCTAAAAAATGGACGACAGCGTGATG  
CAGCTCACACATGTTGCCCTCAGAGCTGGTGCGCAAACACCTGGGTGGGT  
CAGGAAGGAGTTCCAGCGGCTGGGAAATGCCTTCCAGTCCATCAGCCAGG  
CATTCATGCTGGACCCTCCCCACAGCTCAAACGCCCTCANNNNNNNNNNNNNNNNNNCCTCTCGCCAC  
GTTCTCAAACCTGACCTCTCTGGGTTCATCATTGGAGTCGGCGTGGTGC  
GAAACCTCCTGATCTCCATCCTGCTGGTCAAAGACAAGAGCCTGCACCGG  
GCGCCCTACTATTTCTGCTGGACCTGTGCGCCTCCGATATCCTGCGCTC  
CGCCATCTGCTTCCCCTTTGTCTTTCACCTCGGTCAAGAATGGATCTGCCT  
GGACCTACGGCACGCTGACCTGCAAAGTGATCGCCTTCTTGGGCGTGCTC  
TCCTGTTTCCACACGGCGTTCATGCTGTTCTGCGTCAGCGTCACCCGCTA  
CCTGGCCATCGCACACCACCGTTTCTACACCAAGAGGCTGACCTTCTGGA  
CCTGCCTGGCTGTCACTGCATGGTGTGGACGTTGTGAGTGGCTATGGCG  
TTCCCGCCGGTGTAGACGTAGGGACGTACTCTTTTATCCGGGAGGAGGA  
CCAGTGCACGTTCCAGCACCCTCCTTCAGGGCGAACGACTCGCTGGGCT  
TCATGCTCCTGCTGGCCCTCATCCTCCTGGCCACACAGCTGGTTTACCTC  
AAGCTCATCTTTTTTCGTCCACGACCGCCGGAAGATGAAGCCCGTCCAGTT  
CGTGCTGCTGTGAGCCAGAACTGGACCTTCCACGGACCGGGCGCCAGTG  
GGCAGGCGGGCGCCAACGGCTGGCCGGATTTGGTCGAGGCCCCACCCCG  
CCTACTTTGCTGGGCATCCGGCAGAACAGCAATGCAGCGGGCCCGCAGGCG  
TCTACTGGTATTGGATGAATTCAAACGGAGAAGAGGATTAGTAGGATGT  
TCTACATCATGACGTTTTTCTTCTTGGCACTGTGGGGGCCCTATCTGGTT  
GCCTGCTACTGGCGGGTGTGTTGCAAGGGGCCCCGTAGTCCCCGGGGGCTA  
CCTGACGGCAGCCGTGTGGATGAGCTTTGCCAGGCTGGGGTCAATCCTT  
TCATCTGCNNNNNNNNNNNNNNNNNNNN-----  
-----  
-----  
-----  
-----  
-----  
-----  
-----





TGGGCAGACTTTCATGTGCGACAAGTTGTACCTGGTGGACCAGAAGGCCA  
AAGAGATCATCCCCAAGGCTGACATCCCCAGTCCCAGGAAGGAGTTTAGC  
GCCTGTGCCATTGGCTGTAAGGTGTACATTACTGGTGGGA--GGGGCTC-  
AGAGAATGGCGTATCCAAAGATGTGTGGGTCTATGACACTGTGCACGAGG  
AATGGTCAAAGGCRGCGCCCATGCTCATTGCCAGGTTCCGGCCACGGCTCT  
GCAGAGCTGAAACACTGCCTCTACGTTGTAGGAGGCCACACTGCAGCGAC  
CGGCTGCCTCCCGNNNNNNNNNNNGGATGAATACATTGTTGTATTTAGTTCGTTTCAGCAAC  
AAGGCTGATACTGAAATGAAGCAGAGCTCATCATGGCACTGGCCCAGGAGT  
TCCAAATGAGAGTGGTCACAGTGTCCTTAGAGGAACAGTCTTTTCCCAGT  
ATTGTTTCAGGTGATCAGCGGTGCTTCCATGTTAGTCAGCATGCATGGAGC  
TCAGCTTATCACCTCGCTTTTTTCTCCCAAGAGGAGCTGCTGTGGTAGAGT  
TATTCCCTTTTGTGTGAACCCAGAGCAGTACACTCCGTATAAAAACCCTA  
GCCTCACTTCCAGGCATGGACCTTCACTACGCTCCTGGAGGAACACGAA  
GGAGGAAAACACTGTGACCCACCCAGACAGACCCCTGGGAGCAAGGAGGCA  
TTGTTCACTTGGAAAAAGACGAGCAGGAACGAATTCTGGCAAGTAAGGAT  
GTCCCCAGGCACCTTGTGCTGCCGCAACCCAGAGTGGCTCTTCCGGATCTA  
TCAGGACACTTTGGTGGACATCCCATCCTTCCCTGGAAGTTCTCAG---AG  
AAGCCATGAAG---ACCAAGCCCAACTTGAAAAA---GGCCAAGGCAGCC  
AGCACAGTCCACCCGGGCGGGTCCAGAGAGCCCCAATGTCAGACTTCAGT  
ACAAACCTCGAATGAGGCAAAACTTACAGTCTCTTGGCAGATCCCCTGGA  
ATCTGAAATACCTTAAGGTAAGGGAGGTGAAGTACGAGGTGTGGATACAG  
AAAAAAGACACTAGCAAGGGGACACTGGAGGATCAAATCATCCAGGCGAA  
CCCAGCGCTGGAAGCGTTTGGCAACGCCAAAACGTTGAGAAATGACAAC  
CATCTCGATTTGGAAAATTCATCCGAATTCATTTTGGCACAAGTGGCAAA  
CTGTCATCTGCCGACATCGAGACATACCTGCTGGAGAAGTCCCGTGTAC  
CTTTCAGCTCAAGGCCGAGAGGAACTACCACATCTTCTACCAGATCCTGT  
CCAATGAAAAGCCAGAGCTGCTGGACATGCTGCTGATTACCAACAACCCA  
TATGACTACTCCTACATCTCCCAAGGAGAGGTATCGGTGCGCTCCATCAA  
TGACGCGGAGGAGTTGATGGCCACTGACAGTGCCTTCGATGTGCTTGGCT  
TCACTCCAGAGGAGAAGATGGGCGTCTACAAGCTGACTGGTGGCCATCATG  
CACTATGGAAACATGAAGTTCAAACAGAAGCAGCGAGAGGAACAGGCTGA  
ACCTGATGGAACAGAGGCAGCTGATAAATCAGCTTACCTAATGGGGCTGA  
ACTCCGCTGACCTCATCAAAGGGCTGTGCCATCCCAGAGTCAAGGTAGGA  
AATGAATATGTCACCAAAGGTCAAAGTGTGGACCAAGTCTACTACCCCAA  
CAAGGAGGCCTTCAAGTGGCAGGAGTGTGGGAAGCACTACAACACCAAGC  
TGGGATACAAGCGCCATGTGGCCATGCACTCGGCCACCGCGGGCGACCTG  
ACCTGCAAAGTGTGCATGCAGAGCTACGAGAGCACGCCGTTCTCCTGGA  
GCACCTCAAGAGCCACTCGGGGAAGTCTCAGGAGGCGCAAGGAGAAGA  
AACACCCGTGCGACCACTGCGACCGTCGCTTCTACACCAGGAAGGATGTG  
AGGCGGCACATGGTGGTGCACACGGGCCGAAAGGACTTCCCTGTGCCAGTA  
CTGTGCCCAGCGCTTCGGCAGGAAAGACCATCTGACGCGTCACGTGAAGA  
AGAGCCACTCGCAGGAGCTGCTGAAGATCAAGACGGAGCCTCCGGATATG  
TTGGGTCTGTTGGCCACGGGGTCTCCACCCTGCTCCGTGAAGGAGGAGCT  
TAGCCCCATGATGTGTGGCATGGGGCCCAACAAAGACCCCATGATGGGCA  
AACCTTCCCAGTGGGGCGCCTTTCCCGATGGGCATGTACAACCCCCAC  
CAC-----CTCCAGGCCATGTCTAATTCTGGGGTGGGTCACTCA-----  
-CACCCGTCCCTGATGCCCGGTTCCCTTGTCTGCAGCTATGGGCATGGGCT  
GTCACATGGAGNNNNNNNCTATGCCCTTTTCTCATTCATGGGATGTTTACAAATCAG  
TGACGGATCAAATATCGTGAACCTGTTGGCTAGTAACTCTCCGAGTGTTT  
CATACGCTTTGACCCAGCAGAAATACTTTCAGTAACTACAGTCCCTGTGATT  
GGGTTTTATATTTACGAGCCCATCGAGTACTGGAACCTCCACGGTGCAGGA  
GCATCTGAAGACTCTGAGTCATGGCTTCAACAAGATCTCCTGGATGGACA  
ACTTTTTCCACTACCTGCGGGTAGTGAATGTGAGCGCATCAACGAAAGGC

GACTTCATCACCATCCTTAAGGGTTCCTTCCTGCGCAGTCCGGAGTACCA  
GCATTTCACTGAGGACATCATATTCACCAAGA---ACCGCGAGACTG---  
---ATGAGTACGACATTATCGCCTCACGGATGTACTTGGTAGCACGGACC  
ACAGAGAAGAAGCGCGAGGAGGTGGTTGAGCTTTTAGAAAAGCTTCGTCC  
CTTGATGCTGATCAACAGCATCAAATTCATTGCCTTTAATCCAACGTTTG  
TGTTTCATGGACCGCTACAGCTCCTCCGTTCATCTCACCCATCCTGACCTCA  
GGCTTCAGCGTACTCACCATCCTCATCCTCACTTTCTTCCTGGTCATCAA  
CCCCTTGGGGAACTTCTGGCTCATCCTCACGGTTACGTCCGTGGAGCTGG  
GCGTCTTGGGTTTGATGGGCTTTCACCAGTTTGAATGGCAGCCGGCTCTC  
AAGAATGTGTCTGCATCTTGCAACGTTGGCATTATTAACGGGCTCTCTGG  
ATGGGCTTTCCTCGGTGGATGACTCCCCGGCTGACACAATCACTCGGCGCT  
TTCGTTATGATGTGGCACTGGTGTGGCATTAAAGGATCTGGAGGAGGAC  
ATCATGGACGGGCTGAGAGAGAGTGGGATGGAAGACAGCGCTTGCACCTC  
AGGCTTTAGCGTCATGATCAAGGAATGTTGTGATGGTATGGGTGATGTCA  
GCGAGAAGCACGGCGGAGGACCTGTTGTTCCCGAGAAGGCGGTGCGCTTC  
TCTTTCACCGTTATGTCTGTCTCTGTCTCGCAGACGAGGARGAG-----  
-----GAGGAGGTTACCATTTTCACTGAGC  
CAAAACCAAACCTCAGAGCTGTCTGCAAGCCCCCTGCCTGATGTTTCGTG  
GATGAGTCAGACCATGAGACACTCACAGCGCTCCTGGGGCCCATAGTTGC  
AGAGCGTAATGCAATGAAAGAGAGCAGACTCATTCTATCCATTGGCGGCC  
TGCCTCGCTCCATTTCGCTTCCACTTCAGGGGCACGGGGTATGACGAGAAG  
ATGGTGCCTGAGATGGAGGGCCTGGAGGCCTCGGGTCCACGTATGTCTG  
CACTCTGTGTGACTCCACTCGTGCAGAAGCCTCTCAAACATGGTGCTCC  
ACTCCATCACTCGCAATCATGAGGAGAACCCTAGAACGATATGAGATCTGG  
AGGACCAACCCCTTCTCYGAGTCTGCAGACGAGCTGCGAGACCGAGTCAA  
AGGGGTCTCCGCCAAGCCCTTCATGGAGACCCAGCCACGCTAGACGCAT  
TGCACTGCGACATCGGCAACGCCAGCGAGTTCTACAAAATCTTCCAGGAC  
GAGATTGGGGAGGTGTACAAAAGGC---CAAC---CCAGCCGGGAGGA  
GCGGCGCAGCTGGAGGGCCGCCCTGGATAAACAGCTGAGGAAGAAGATGA  
AGCTTAAACCGGTAATGAGGATGAATGGGAACTACGCCCGCCGGCTAATG  
ACCCCTGGAGGCTGTGGAGGTGATATGTGAGCTGGTGCCTCCGAGGAGAG  
GAAGGAGAACCTGAGGGAGCTCATGAGGCTCTACCTGCAGATGAAGCCTG  
TGTGGCGCGCCACCTGTCCAGCCAAAGAATGCCCGACCAGCTGTGCCGC  
TACAGCTTCAACTCCCAGCGCTTCGCTGACCTCCTCTCCTCCTTCAA  
ATATAGATAACAACGGGAAGATAACCAATTACCTGCACAAGACCCTGGCCC  
ACGTGCCTGAAATCATAGAGAGGGAGGGATCCATAGGAGCCTGGGCCAGC  
GAGGGGAACGAGTCCGCAAACAAGNNNNNNNNNNNNNNNNNNNGTCCCCAGGGGCCCCAGTGGAAGGAC  
AACCCACAGCCTTCTCCTGCTCCATTGAGGACCCACCAAACAGACAAA  
GTTCAAGGGTATCAAGACCTACATTTTCGTACCGGGTCACGCCGAGCCACA  
CGGGGCGTCCCGTCTACAGACGCTACAAACACTTYGACTGGCTGTACAAC  
CGTTTACTGCACAAGTTCCTGTGATCTCTGTTCCCCACCTGCCTGAGAA  
GCAGGCCACGGGGCGGTTTGANGAAGACTTCATCGAGAAGCGCAAGAGGCG  
ACTGATACTATGGATGAACCACATGACCAGTCACCCAGTCTCTCCAGT  
ATGAAGGCTTTGAGCACTTTCTGATGTGTGCTGACGACAAGCAGTGGA  
CTGGGCAAGAGACGGGCAGAGAAGGACGAGATGGTGGGCGCACATTTTCAT  
GCTGACACTCCAAATCCCCAACGAACACCAGGACCTTCAGGATGTTGAGG  
AGCGGGTCGACAACCTCAAGGCCTTTGCGAAGAAAATGGACGACAGCGTG  
ATGCAGCTCACACACGTTGCCTCAGAGCTGGTGGTAAACACCTGGGTGG  
ATTCAGGAAGGAGTTCAGCGGCTGGGAAACGCCTTCAGTCCATCAGCC  
AGGCTTTCATGCTGGACCCTCCCCATAGGTGAGAKACCCTCAACAATGCC  
ATCTCCATNNNNNNNNNNNGTTGCTCAAACCTGACCTCTCTGGGTTCATCATCGGAGTTG  
GCGTGGTCCGAAACCTCCTGATCTCCATCCTGCTGGTCAAAGACAAGAGC  
CTGCACCGAGCGCCCTACTATTTCTGCTGGACCTGTGCGCCTCTGATAT

CCTGCGCTCCGCCATCTGCTTCCCCTTCGTCTTCACCTCGGTCAAGAATG  
GATCTGCCTGGACCTACGGCAGCTGACCTGCAAGGTGATTGCCTTCCTG  
GGTGTGCTCTCCTGTTTCCACACAGCGTTCATGCTCTTCTGCGTTAGTGT  
CACGCGCTACCTGGCCATCGCACATCATCGTTTCTACACCAAGAGGCTGA  
CTTTCTGGACGTGTTGGCCGTATCTGTATGGTGTGGACGCTGTCAGTG  
GCGATGGCRTTCCCGCCGGTGTAGACGTAGGGACGTACTIONTTTTATCCG  
GGAGGAGGACCAGTGCACCTTCCAGCACCCTTCCAGGGCGAATGATT  
CGCTGGGCTTTCATGCTCCTGCTGGCRCTCATCCTTCCAGGGCACACAGCTG  
GTTTACCTCAAGCTCATCTTCTTCGTCCACGACCGTCGAAAGATGAAGCC  
CGTCCAGTTCGTGCTGCGGTTCAGTCAGAACTGGACCTTCCACGGGCCAG  
GCGCCAGCGGGCAGGCTGCGGCCAACTGGCTAGCTGGATTTGGTTCGAGGC  
CCCACCCCGCTACTCTGCTGGGTATCCGGCAGAACAGCAATGCAGCGGG  
CCGCCGGCGTCTACTGGTTTTGGATGAGTTCAAAAACGGAGAAGAGGATTA  
GTAGGATGTTTACATCATGACGTTTTTTCTTCCAGGGCGCTGTGGGGGCC  
TACCTGGTTCGCTGCTACTGGCGGGTTTTTTGCGAGGGGCCCTGTGGTCCC  
TGGAGTTTACTGACAGCAGCCGTGTGGATGAGCTTTGCCAGGCTGGGG  
TCAATCCTTTTCATCTGCATCNNNNNNNNNNNNNNNNNNNNNNNNNNNNNNNNCTGGCGTGGGGACTGG  
TCCTGGCACGGAG

C---GCAGCGTCCCACTCGGCAACAGCTTGCTATCCCCGCAGCAAACCGA  
GGAGCCCAGTGTGCCACCCCGCAGCGATGGTTTGTACCC---CTG  
CCAACAACCGACTGGACTTTTGCTGCCCTCGGCATACGACGCCGCT-----  
---GATTTCCGCCGTAACGCGGCCACCCTTGCTGTCTTACGCAGCGGCCGG  
AGTTAAGGCTC-----TTCCCCTGCCGACTGCAGGCTGCTCCAATCGGC  
CTCTTGGCTATTACGCAGACCCGCTCTG---GCTGG---GGAGGACGCACG  
CCGCCGAGTACTGTGGTGTAAATAGTAAATCCAGCTCGGTCTTTTCCTG  
CTGGCCCGCTAACTCCCTCGGAGGCAGAGCCGGCA---CC---AACTACC  
TGT-----CCGAGGA---GGGA---GACTC---CATCACGACGGAG  
AGGTCACCG---AT---CGGCGCGTCGGAGGAG---ACCAAACCCAAAGA  
CATGAC---GTCCGA---GTCGAGCTGGATAGAG---ACGCCGCTCCTCCA  
TAAAGTCCATCGATTCCAGCGACTCTGGGATCTTTG---AACAGGCCAAA  
CGGAGAAGAATCTCACCTTCTGCCACACCG-----GTTTCAGAGAC  
AGTGTCCCCGTAAAATCCGAGCATCACTCAACAGGCGAAGTCACAGAGC  
GAGAAGTGGCGTTGGGGATAAATCCGTTTGCAGATGGGATGGGCGCCTTC  
AAAATCAACCACAGCTCCCACGATATTGGCTCCGG---ACAGACGGCGTT  
TTCTCCAGGCG---CCCGGTTAC---GCAGCAGCCGCCTTGGGA---C  
ACCATCA-----CCACCCGACCACGTTGGCTCT---TACTCCACGGCG  
GCTTTCAACTCCACCAGGACTTTCTGTTTCAGAAATCGGGGTTTCGGGGA  
TGCCACCG-----GGCGCAGCACAGTTTGTTCGCCTC-----  
-----GGGAAGTTT---C-----GCAGGGCCACACGGACACTCAGATGCG  
GCGGGGCACCTGCTCTTCCCAGGGCTCCACGAG---CAGGCGGCGAGCCA  
CGCGTCTTCCAACGTGGTCAACAGCCAGATGCGGCTGGGCTTCTCGGGGG  
ACATGTACGGACGCGCCGAGCAGTACGGCCACGTTACGAGCCCCAGGT--  
-CCGACCACTACGCATCGACCCAGCTGCACGGCTACGGCCCCATGAACAT  
GAATATGGCCGCG---CACCACGGTGCAGGGCCTTCTTTCGGTACATGA  
GGCAGCCGATCAAGCAAGAGCTCATCTGCAAGTGGATCGAGCCGGAGCAG  
CTGACGAATCCAAAAAGTGTGCAAAAACTTTCAGCACGATGCACGA  
GCTGGTGACCATCTGACGGTGGAGCATGTGGGGGACCGGAGCAGACCA  
ACCACATTTGCTTCTGGGAGGACTGCTCCCGAGAAGGGAAGCCGTTCAAA  
GCCAAATACAACTTGTGAATCATATCAGAGTACACACCGGAGAAAAGCC  
CTTTCCGTGCCCGTTCCCCGGCTGTGGCAA

>Steindachneria argentea  
-----  
-----

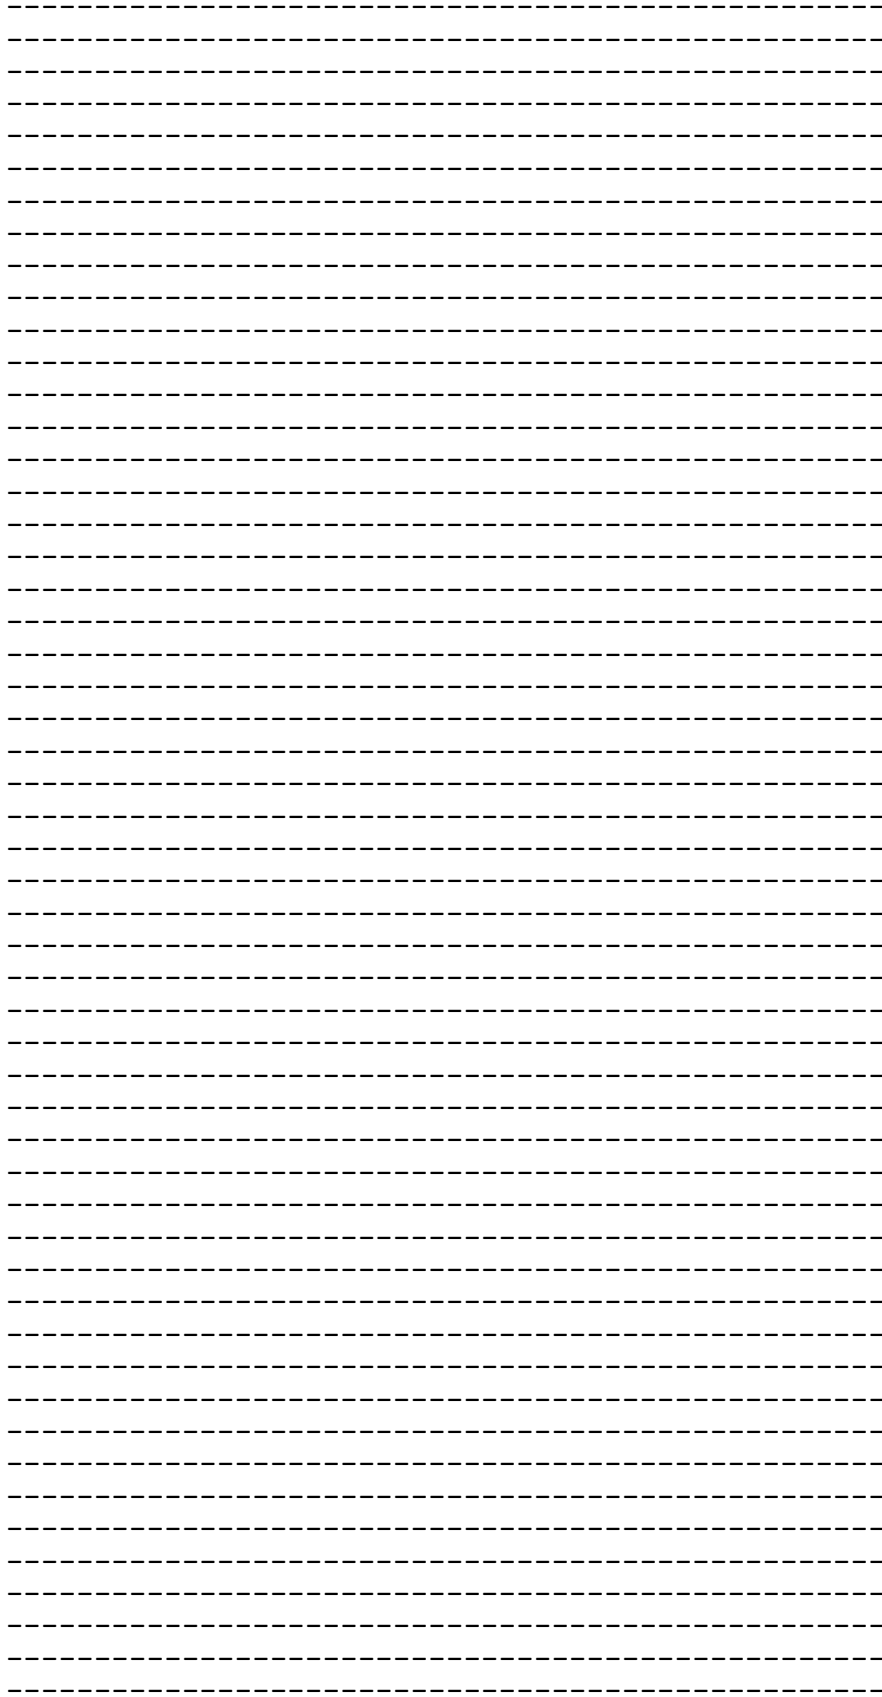



CA-----

A series of 38 horizontal dashed lines for writing.

-----  
-----  
-----  
-----  
-----  
-----ATGGGCGCCTTCAAATAAAACCACAGCTC  
TCACGACATTGGCTCCGG---ACAGACGGCGTTTTCTCCCAGGCG---C  
CAGGCTAC---GCGGCGGCCGCCCTAGGA---CACCACCA-----TCAC  
CCCACGCACGTTAGTCT---TACTCCACTGCCGCTTCAACTCCACACG  
GGACTTTCCTTTTCAGAAATCGGGGTTTCGGAGACGCCACCAG-----  
----CGCGCAGCACAGTTTGTTCGCCCTCCGC---CGCGGGAAGTTT---C  
-----GCCGGCCACATGGACACTCCGATGCCACGGGACACCTGCTCTT  
CCCGGGGCTCCACGAG---CAAGCGGCGAGCCACGCGTCTCCAATGTCTG  
TCAACAGCCAGATGCGACTCGGCTTCTCCGGAGACATGTACGGCCGGGCC  
GACCAGTACGGGCACGTTACGAGCCCGAGGT---CCGACCACTACGCGTC  
GACCCAGTTGCACGGCTACGGCCCCATGAACATGAATATGGCCGCG---C  
ACCACGGAGCCGGGGCCTTCTTTTCGGTACATGCGGCAGCCGATCAAGCAA  
GAGCTGATCTGCAAGTGGATCGAGCCGGAGCAGCTGTCAAACCCCAAAAA  
GTCGTGCAACAAAACTTTCAGCACGATGCACGAGCTGGTGACCCACCTGA  
CGGTGGAGCATGTGGGGGGACCCGAGCAGTC-----  
-----  
-----

>Stereolepis gigas

AGCCTGCTCATTCGGGCAGAACTAAGCCAACCCGGCGCCCTCTTAGGGGA  
CGACCAAATTTATAACGTAATTGTTACAGCACACGCATTTGTAATAATTT  
TCTTTATAGTAATGCCAATTATAATCGGAGGATTCGAAACTGACTTGTC  
CCCCAATGATCGGGGCCCCAGACATAGCATTCCCTCGAATGAATAATAT  
AAGCTTTTACTTCTTCCCCATCCTTCCTCCTCCTTCTTGCTTCTCAG  
GAGTAGAGGCTGGCGCTGGCACCGGATGAACAGTCTACCCTCCCCTAGCT  
GGTAATTTAGCCCACGCAGGGGCCCTCCGTTGACTTGACAATTTTTTCTCT  
ACACTTAGCAGGGATTTCCCTCAATTCCTCGGAGCCATTAACCTCATTACAA  
CCATCATTAACATAAAACCCCTGCCATCTCCCAATATCAGACTCCTCTC  
TTTGTATGAGCCGTAATAATTACCGCGTCTTCTCCTCCTCTCCCTCCC  
AGTTCGCTGCTGGCATTACAATACTTCTTACAGATCGAAACCTCAACA  
CCACCTTCTTCGACCCCGCAGGAGGGGGCGACCCAATCCTCTACCAACAC  
CTA-----  
-----  
-----

-----  
-----  
-----  
-----  
-----  
-----TTCTAGAGAGAAACCTTACCCATCTAACTGCCTTGG  
CATGCTATTGCTGTCTGACGCCCACAGTGCACCAAGCTGTCAGAGCTCT  
CCTGGGGCATGTGCTCAGCAACTTTCCCGCTATTTGCAAGACAGAGGAC  
TTCTCCAACCTGCCAAAGATATGGTGGTGCAGCTTTTGTACATGAGGA  
GCTAGAGACAGAAGATGAGAGACTGGTTTATGAAGCTGCCCTTAACGGA  
TCAACTATGACCTGGAAAAGAGGCAC TGCCACCTTCCAGAGCTCCTGAGA  
ACGGTCCGTCTGGCCCTGCTGCCTGCCATCTTTCTCATGGAGAACGTTTC  
TACAGAAGAGCTGATCAATGCCAGGCCAAGAGCAAGGAGCTGGTGGATG  
AAGCTATCCGTTGTAAGTTGAAGATCTTGCAGAATGATGGTGTGTTAAC  
AGTCCGTGTGCTCGACCAAGAAAAACAGCCATGCCCTCTTTCTTCTGGG  
AGGGCAGACTTTCATGTGTGACAAGTTGTACCTGGTGGACCAGAAAGCCA  
AAGAGATCATCCCCAAAGCTGACATTTCCAGCCCCAGGAAGGAGTTCAGC  
GCCTGCGCCATCGGCTGTAAGGTGTACATCACTGGTGGGA--GAGGCTC-  
AGAGAATGGTGTGTCCAAAGATGTGTGGGTCTATGACACCGTCCACGAGG



AATGGTCGAAGGCGGCACCCATGCTCATTGCCAGGTTTGGCCATGGCTCT  
GCAGAGCTGAAACACTGCCTCTACGTGGTCGGAGGGCACACCGCAGCAAC  
TGGCTGCCTCCCAGCATCTCCNNNNGGATGAATACATTGTTGTGTTTAGTTCGTT  
CAACAACGAGGCTGATACTGAATGAAGCAGAGCTAATCATGGCGCTGGCC  
CAGGAGTTCCAGATGAGAGTGGTCACGGTATCCCTGGAGGAACAGTCTTT  
TCCCAGTATCGTCCAAGTGATCAGCAGTGCTTCCATGTTAGTCAGTATGC  
ATGGAGCTCAGCTTATCACCTCACTCTTCCCTCCCCAGAGGAGCTGCTGTG  
GTGGAGCTGTTCCCTTTGCTGTGAACCCAGAGCAGTACACCCCATATAA  
AACCTTGCCTCCCTTCCAGGCATGGACCTTCACTATGTCTCCTGGAGGA  
ACACTAAGGAGGAGAACACCATCACCCACCCAGACAGACCCTGGGAACAA  
GGGGGCATTGCTCACTTGGAGAAGGAGGAGCAAGAGCGAATACTGGCGAG  
CAAAGATGTCCCAGGCACCTGTGCTGCCGCAACCCAGAGTGGCTCTTCC  
GGATCTACCAGGACACTTCGGTGGACATCCCTTCCCTTCCCTGGAACCTCCTC  
AA---AGAGGGCATGAAG---ACAAAGCCCAGCTTGAAGAA---GTCAA  
GCCGGCCAGCACAGTCCATCCGGGCCGAGTCAGAGAACCCCAATGTCAGA  
CCTCAGTACAAACCACTAATGAGGCTAAACTCACAGTCTCCTGGCAGATC  
CCGTGGAATCTGAAAATACCTGAAGGTGAGAGAGGTGAAGTACGAGGTG--  
-----AAAAAGACACCAGCAAGGGGACCCTGGAGGATCAAATCATCC  
AGGCGAACCCCTGCGCTGGAGGCATTCGGCAACGCCAAAACATTGAGAAAC  
GACAACTCGTCTCGTTTTGGAAAATTCATCCGAATTCACTTCGGTACAAG  
CGGAAAGCTGTCTGCTGACATCGAGACGTACCTGCTAGAGAAGTCAC  
GTGTCACTTTTAGCTCAAGGCTGAGAGGAACTACCACATCTTCTACCAG  
ATCCTGTCCAATCAGAAGCCAGAGCTGCTGGACATGCTGCTGATCACAA  
CAACCCGTACGACTACTCCTACATCTCCCAAGGAGAGGTAACGGTCGCCT  
CCATCAACGACTCGGAGGAGCTGATGGCCACCGACAGCGCCTTCGATGTG  
CTCGGCTTCACTCCAGACGAGAAGATGGGCGTCTACAAACTGACCGGTGC  
CATCATGCACTACGGCAACATGAAGTTCAAACAGAAGCAGCGTGAGGAGC  
AGGGGGAGCCGGATGGGACGGAGGCTGCTGATAAATCGGCTTACCTAATG  
GGCTGAACTCTGCTGACCTCATCAAAGGGCTGTGCCATCCCAGAGTCAA  
GGTAGGAAATGAATACGTACCAAAGGCCAAAGTGTGGACCAAGTCTACT  
ACCCCAACAAGGAGGCCTTCAAGTGTGAGGAGTGTGGGAAGCACTACAAC  
ACCAAGCTGGGATATAAGCGCCATGTGGCCATGCACTCTGCCACGGCAGG  
GGATCTACCTGTAAAGTGTGCATGCAGACCTACGAGAGCACACCCGTGC  
TCTTGGAGCACCTCAAGAGCCACTCCGGGAAGTCTTCGGGTGGCACCAAG  
GAGAAAAAACACCCGTGCGACCACTGTGACCGTCGTTTCTACACGCGGAA  
GGATGTGAGACGGCACATGGTGGTCCACACGGGCCGAAAGGACTTCCTGT  
GCCAGTACTGTGCCCAGCGCTTCGGCAGGAAGGACCATCTGACACGTCAC  
GTGAAGAAGAGCCACTCGCAGGAGCTGCTGAAGATCAAGACGGAGCCTCC  
TGATATGTTAGGTCTTTTAGCGTCGGGGTCACCACCCTGCTCTGTGAAGG  
AGGAGCTCAGCCCCATGATGTGCGGCATGGGTCCCAACAAGACCCCATG  
ATGGGCAAACCGTTCCCCAGTGGGGCCCCTTTCCCGATGGGCATGTACAA  
CCCCACCAT-----CTCCAGGCCATGTCTAATTCGTTGGGTGGGTACC  
CA-----CACCCGTCCCTGATGCCAGTTCCTTGTCTGCAGCTATGGGC  
ATGGGCTGTACATGGAATATCTCATCTACGCCTCTTTCTCATTCATGGG  
ATGTTTACAAATCAGCGACGGATCAAATATCGTGAACCTGCTGGCTAGTA  
ACTCTCCGAGTGTTCGTACGCTCTGACCCAGCAGAAATACTTCAGTAAC  
TACAGTCCCCTGATTGGGTTTTACATTTACGAGCCATTGAGTACTGGAA  
CTCAACGGTGCAGGAGCACCTGAAGACTCTGAGTCATGGCTTTAACAAGA  
TCTCCTGGATGGACAACTTTTTCCACTACCTGCGGGTGGTGAATGTGAGT  
GCGTCAACCAAGAGCGACTTCATCACCATCCTCAAGGGCTCCTTCCCTGCG  
CAGCCCGGAGTACCAGCACTTCACTGAGGACATCATATTCTCCAAGA---  
ACCGCGAGACTG-----ATGAGTACGACATTATTGCCTCACGGATGTAC  
TTGGTGGCACGGACGACAGAGAAAAACGCGAAGAGGTGGTTCGAGCTTCT

GGAGAAGCTTCGTCCGTTGATGCTGATCAACAGCATCAAGTTCATTGCCT  
TCAATCCTACGTTTGTGTTTCATGGACCGCTACAGCTCCTCTGTCATCTCG  
CCCATCCTGACCTCAGGCTTCAGCGTACTCACAATCCTCATCCTCACTTT  
CTTCTGCTCATTAACCCCTTGGGGAACCTTCTGGCTCATCCTCACTGTAA  
CGTCCGTGGAGCTGGGCGTCTTGGGTTTGATGTGGCTTTCCAAGTTTGAA  
TGGCAGCCAGCTCTCAGGAATGTGTCACATCTTGCAACGTTGGCATTAT  
TAATGGGCTCTCTGGATGGGCTTCTCGGTGGATGACTCCCCAGCTGACA  
CCATCACTCGGCGGTTTCGCTATGATGTGGCACTGGTGTGAGCATTAAAG  
GATCTGGAGGAGGACATCATGGAGGGGCTGAGAGAGAGTGGGATGGAAGA  
CAGTGCTTGACCTCAGGCTTCAGTGTGATCAAGGAATCTTGCGATG  
GCATGGGCGATGTGAGGAGAAGCACGGTGGAGGACCAGTTGTTCTGAG  
AAGGCTGTACGTTTCTTTTCACTGTTATGTCTGTCTGTCTGCTGGCAGA  
CGATGAGGAG-----GAAGAGGTTA  
CCATCTTACCCGAGCCAAAGCCAAACTCAGAATTGTCCTGTAAGCCCCTT  
TGCTGACGTTTGTGGATGAGTCAGACCATGAGACACTCACAGCCGTCCT  
AGGGCTATAGTTGCAGAGCGTAAAGGGATGAAAGAGAGCAGGCTCATCC  
TATCCATGGGTGGACTACCTCGCTCCTTCCGCTTTCACTTCAGAGGCACG  
GGATACGATGAGAAGATGGTGCCTGAGCTAGAGGGCCTCGAGGCCTCAGG  
GTCTACTATGTCTGCACTCTTTGTGACTCCAGTCGGACAGAAGCCTCTC  
AAAACATGGTGCTACACTCCGTCACCCGCAGTCATGAAGAGAACCCTAGAA  
CGTTACGAAATATGGAGAACCAACCCCTTTTCTGAGTCTGTAGATGAGCT  
GCGAGACAGAGTCAAAGGGGTCTCTGCCAAGCCCTTCATGGAGACCCATC  
CCACGCTGGATGCATTACACTGTGACATTGGCAATGCCACTGAGTTCTAC  
AAAATCTTCCAGGACGAGATCGGGGAGGTGTACCAAAGGT---CAAC--  
-CCCAGCCGGGAGGAACGGCGCAGCTGGAGGGCAGCCCTAGATAAACAGC  
TGAGGAAGAAGATAAAGCTTAAACCGGTAATGAGGATGAATGGGAACTAT  
GCCCCGAGGCTAATGACCCAGGAGACTGTGGAGGTGGTGTGTGAGCTGGT  
GCCCCAGAGCTGAGGAGGGAGGCCCTGAGGGAGCTTATGAGGCTCTACC  
TCCAGATGAAGCCTGTGTGGCGCGCCACCTGCCAGCCAAGGAGTGCCCC  
GACCAGCTGTGCCGCTACAGCTTTAACTCCCAGCGCTTTGCCGACCTCCT  
CTCCTCTACCTTCAAATATAGGTACAATGGAAAGATAACCAATTACCTGC  
ACAAGACCCTGGCCCATGTGCCTGAAATCATAGAGAGAGACGGATCCATA  
GGAGCCTGGGCCAGCGAGGGGAACGAGTCGGCAAACAAATCGTACCCAT  
CGACATGGGCCCTTTGGGTCCCCGGTGGAAAGGAGAGCCACAGCCTTTCT  
CCTGCTCCATTGAAGACCCACAAAACAGACAAAGTTCAAGGGCATCAAG  
ACGTACATTTTCGTACCGGTCACGCCGAGCCACACAGGGCGTCCCGTCTA  
CAGGCGCTACAAACACTTTGACTGGCTGTACAACCGTTACTGCACAAGT  
TCACTGTGATCTCCGTGCCCTCACCTGCCCTGAGAAGCAGGCCACGGGGCGA  
TTTGAGGAAGACTTCATCGAGAAGCGTAAGAGGGGACTGATACTGTGGAT  
GAACCACATGACCAGTCACCCAGTCCCTCCCAGTATGAAGGCTTTGAGC  
ACTTCTGATGTGCGCTGATGACAAGCAGTGGAAACTGGGCAAGAGACGG  
GCGGAGAAGGACGAGATGGTGGGTGCCCATTTTCATGCTGACCCCTCAGAT  
CCCTAATGAGCACCAGGACCTTCAGGATGTAGAGGAGCGGGTCCGACTCCT  
TCAAGGCCTTTGCTAAGAAAATGGATGACAGCGTGATGCAGCTCACACAT  
GTTGCCCTCGGAGCTGGTACGTAAGCACCTGGGTGGGTTTCAGGAAGGAGTT  
CCAGCGGCTGGGAAAATGCCTTCCAGTCTATCAGCCAGGCCTTCATGCTGG  
ACCTCCCCACAGCTCAGAAACCTTCAACAACGCCATCTCCCATNNNNNNNNNNNNNNNNNNNNNNNNNNNN  
NNNNNTGGGTT  
TCATCATTGGAGTCGGTGTGGTTGGAAACCTCCTGATCTCCATCCTGCTG  
GTCAAAGACAAGAGCCTGCACCGAGCGCCCTACTATTTCTGCTGGACCT  
GTGCGCCTCTGATATCCTRCGCTCCGCCATCTGCTTCCCCTTTGTCTTCA  
CCTCGGTCAAGAATGGATCTGCCTGGACCTATGGCAGCTGACCTGCAAA  
GTGATCGCCTTCTGGGTGTGCTCTCCTGTTTCCACACGGCGTTTATGCT

ATTCTGTGTAAGTGTACACGCTACCTGGCCATCGCACATCACCGTTTCT  
ACACCAAGAGGCTGACCTTCTGGACCTGTCTAGCTGTCATCTGCATGGTG  
TGGACGTTGTGAGTGGCTATGGCGTTCCCGCCGGTGCTAGACGTAGGGAC  
GTACTCTTTTATCCGGGAGGAGGACCAGTGCACATCCAGCACCGTTCCT  
TCAGGGCGAATGATTCGCTGGGCTTCATGCTCCTGCTGGCGCTCATTCTC  
CTGGCCACACAGCTGGTTTACCTCAAGCTCATTTTCTTCGTCCACGACCG  
TCGAAAGATGAAGCCTGTCCAGTTCGTGCCTGCTGTCAGCCAGAAGTGA  
CCTTCCATGGGCCAGGCGCCAGCGGGCAGGCGGGCCAACTGGCTGGCT  
GGATTTGGTTCGAGGCCCCACCCCGCTACTTTGCTGGGCATCCGGCAGAA  
CAGCAATGCAGCGGGCCGAGGCGTCTACTGGTATTGGATGAATTCAAAA  
CAGAGAAGAGGATTAGTAGGATGTTCTACATCATGACGTTTTTCTTCCTG  
GCACTGTGGGGGCCCTATCTGGTGCCTGCTACTGGCGGGTGTGTTGCAAG  
GGGCCCTGTGGTCCCTGGGGGCTACCTGACGGCAGCCGTGTGGATGAGCT  
TTGCNNNNNNNNNNNNNNNNNNNNNNNNNNNNNNNNNNNNNNNNNNNGCCAAATCTCGCTTTCACCC  
TGGCATGGGGACTGGTCCCTGGCACGG

AGC---GCAGCGTCCCACTCGGCAACAGCTTGCTATCCCCGCAGCAAACC  
GAGGAGCCCACTGTTGCCACCCCCCGCAGCGATGGTTTGTACCC---C  
TGCCAACAACCGACTGGACTTTGCTGCCTCGGCATACGACGCCGCT----  
-----GATTTGCGCGGTAACGCGGCCACCTTGCTGTCCTACGCAGCGGCC  
GGAGTGAAGGCTC-----TTCCCTGCCGACTGCAGGCTGCTCCAACCG  
GCCTCTTGGCTATTACGCAGACCCGTCGG---GCTGG---GGAGGACGCA  
CGCCGCCGAGTACTGTGGTGTAAATAGCAAATCCAGCTCGGTCTTTTCC  
TGCTGGCCCACTAACTCTATCGGTGGCAGAGCAGGCA---CC---ACTA  
CCTGG-----CAGAGGA---GGGA---GACTC---CATCCCGACAG  
AGAGGTCACCG---AT---CGGCGGCTCGGAGGAG---ACCAAACCCAAA  
GACCTGAC---ATCAGA---GTCGAGCTGGATAGAG---ACGCCGTCCTC  
CATTAAGTCCATTGATTCAAGCGATTCTGGTATCTTTG---AACAGGCCA  
AAAGGAGAAGAATCTCACCTTCTGCCACGCCG-----GTTTCAGAG  
ACAGTATCCCCGTTGAAATCGGAGCATCACTCAACAGGCGAAGTCACGGA  
GAGAGAAGTGGCGTTGGGGATAAATCCGTTTCGCGGATGGGATGGGCGCCT  
TCAAATAAACCACAGCTCCACGATATTGGCTCCGG---ACAAACGGCG  
TTTTCTCCAGGCG---CCCGCTAC---GCAGCAGCCGCCCTGGGA--  
-CACCATCA-----CCACCCGACCCACGTTGGCTCT--TACTCCACGG  
CGGCTTTCAACTCCACCAGGGACTTCTCTTCAGAAATCGGGGTTTCGGG  
GACGCCACCG-----GGCGCAGCACAGTTTGTTCGCCTC---  
-----CGGAAGTTT---C-----GCAGGGCCACATGGACACTCAGATG  
CAGCGGGGCACCTGCTCTTCCCAGGGCTCCACGAG---CAAGCGGCGAGC  
CATGCGTCTTCCAACGTGGTCAACAGCCAGATGCGGCTGGGCTTCTCGGG  
GGACATGTACGGGCGGGCCGACCAGTACGGCCACGTTACAAGCCCGCGGT  
---CCGACCACTATGCTTCGACCCAGCTGCACGGCTATGGCCCCATGAAC  
ATGAATATGGCCGCA---CACCACGGAGCAGGGGCCCTTCTTTCGATACAT  
GAGGCAGCCGATCAAACAAGAGCTCATCTGCAAGTGGATCGAGCCGGAGC  
AGCTGACGAATCCCAAAAAGTTCGTGCAACAAAACCTTTTAGCACGATGCAC  
GAGCTTGTGACCCATCTGACGGTGGAGCATGTGGGGGGACCAGAGCAGAC  
CAACCACATCTGCTTCTGGGAGGAGTGCGCCAGAGAAGGAAAGCCATTCA  
AAGCCAAATACAACTTGTAATCATATCAGAGTACACACCCGGAGAAAAG  
CCCTTCCCGTGTGCNNNNNNNNNNNNNNNNNNNNNNNNNNNNNNNNNNNNNNNNNN

>Sternoptyx pseudobscura  
AGTTTATTAATTTCGGGCGGAACTAAGTCAGCCGGGCGCGCTTCTTGGGGA  
CGATCAAATTTATAATGTTATTGTAACCGCGCATGCGTTTGTAAATGATTT  
TCTTTATAGTCATGCCTATTATGATTGGGGGATTTGGTAATTGGCTAATC  
CCTCTTATAATTGGTGCACCTGATATGGCTTTCCCTCGAATAAATAATAT  
GAGTTTCTGACTTCTTCCCTCCATCCTTCCCTACTCCTGTTGGCCTCATCAG



AATGGGGCTGAACTCTGCAGATCTAGCGAAAGGACTCTGCCATCCCAGGG  
TTAAGGTTGGCAATGAATATGTCACTAAAGGGCAGGGTGTGGACCAAGTC  
TACTACCCCAACAAGGAAGCCTTCAAGTGTGAGGAGTGCGGCAAGCACTA  
CAACACCAAGCTGGGCTACAAGCGCCACGTGGCCATGCACTCGGCCACGG  
CCGGAGACCTCACCTGCAAGGTGTGCTTGCAGAGCTACGAGAGCACGCCG  
GCCCTGCTGGAGCACCTGAAGAGCCACTCCGGGAAGTCGTCCGGCGGCGC  
CAAGGAGAAGAAGCACCCGTGCGACCACTGCGACCGCGCTTCTACACAC  
GCAAGGACGTCCGGCGCCACATGGTGGTGCACACCGGCCGCAAGGACTTC  
CTGTGCCAGTACTGCGCCAGCGCTTTGGCAGGAAGACCATCTGACGCG  
GCACGTGAAGAAGAGCCACTCGCAGGAGCTGCTGAAGATCAAGGCGGAGC  
CTCCGGACATGCTGGGGCTGTTGGGGTCCGGCTCGCCACCCTGCTCCGTC  
AAGGAGGAGCTCAGCCCCATGATGTGCAGCATGGGTCCCTCCAAGGACCC  
GCTGATGGCCAAGCCTTTCCCCAGCGGGACCCCTTCCCCATGGGCATGT  
ACAACCCACCAC-----TTGCAGGCCATGTCCGGCCCCGGGGGGGC  
CAC-----CACCCTCCCTGATGCCCGGTCCCTGTCTGCGGCTAT  
GGGCATGGGCTGCCACATGGAC-----

-----TGCTACCCTCCTT  
TGAGTGGCAGCCGGCCCTCAAGAACGTGTCCACGTCCTGCCAGGTGGGTA  
TCATCGATGGGCTGTGGGGTGGGCTGCGTCCATAGACGACTCCCCGGCA  
GACCTGTCTCCCGCGCTTCCGCTATGATGTGGCACTGGTGTGCGCTCT  
GAAAGACCTAGAGGAGGACATAATGGAGGGGATGAGGGAACGCGTCGTGG  
AGGATAGTACCTGCACCTCGGGCTTCAGCGTGATGATCAAGGAGTCCTGC  
GACGGCATGGGGGACGTAGCAGGAGAAGCATGGCGGGGACAGCGGTTC  
TGAAAAGGCTGTGCGGTTCTCCCTTACCATCATGTCCATCTCTGTCCAGG  
TTGACGGTGAGGAC-----AAGGCT  
GTCACCGTCTTCAGGGAGCCCAAGCCAACTCTGAACTGTCTTGCAAGCC  
TCTGTGTCTGATGTTGTGGATGAGTCAGATCATGAGACACTGACGGGCG  
TCCTCGGGCCTGTGGTGGCCGAGAGGGATGCCATGAAGAACAGCCACCTG  
ATCCTATCTCTGGGAAGCCTCCCTCGATCCATTCGCTTTCCTTCCAGGGG  
TACAGGGTACGATGAGAAGATGGTGCCTGAGATGGAGGGCCTGGAGGCCT  
CGGGCTCCACATACATCTGCACCTCTGTGACTCCACACGGGCAGAGGCC  
TCGCACAACATGGTGCTTCACTCTGTTACCCGCAGCCACGACGAGAACAA  
GGAGCGCTACGAGATCTGGAGGACCAACCCCTATTCCGAGTCCGGCGGAAG  
AGCTCCGGAATCGGGTGAAAGGTGTCTCTGCCAAACCCTTATGGAGACC  
CAGCCACTCTGGACGCTCTGCACTGTGACATCCGTAATGCCACTGAGTT  
CTACAAGATCTTTCATGATGAGATCGGGGA-GTGTACCAGA-GCC---CA  
AC---CCAAGCAGGGAGGAGCGCCGGGGTGGCGGACAGCTTTGGACAAG  
CAATTGAGAAGGAAGATGAAGCTGAGGCCAGTGATGAGGATGAATGGAAA  
CTACGCCCCAGCGGCTGATGACCTGCGAGGCGGTGGAGGTTGTGTGTGAGC  
TTGTCCCCTCTGAACAGCGGCGGGGAGGCCCTCAGGGAAGTGTGGGGCTC

TACGTCCAAATGAAGCCTGTATGGCGTGCCACCTGCCAGCCAAAGAGTG  
CCCAGACCAGCTGTGCCGCTACAGCTTCAACTCGCAGAGGTTTGCCGAGC  
TCCTCTCCTCCACCTTCAAGTACAGATATGACGGTAAGATCACCAACTAT  
CTTACAAGACACTGGCCACGTGCCAGAGATTGTAGAGAGGGACGGTTC  
CATCGGTGCCTGGGCCAGTGAGGGGACGAGTCGGGCAACAAGTCTTACA  
CGATCGAAATGGGCCCAAAGGGCCTCAGTGGAAAAGAGAGCCCTCAGCCA  
TTCTCTTGTCTGTTGAGGACCCTACCAAACAGACCAAGTTCAAAGGCAT  
CAAGACCTACATATCTTACCGGGTCACCCCAGCCACACCGGGCGACCCG  
TATATCGMCGGTACAAGCACTTTGATTGGCTATAACAACCGTCTGCTGCAT  
AAGTTCACCGTCATCTCTGTGCCTCACCTGCCGGAGAAGCAGGCCACAGG  
GCGCTTCGAGGAGGACTTCATTGAAAAGCGAAAACGGCGGCTGATTCTCT  
GGATGGACCACATGACCAGTCACCCGGTCTCTCCAGTACGAGGGCTTT  
GAGCACTTCTCATGTGCGCTGACGACAAACAGTGGAAAGCTGGGCAAGCG  
GCGGGCGGAGAAGGATGAGATGGTGGGCGCCACTTCATGTTGACCTTTC  
AGATTTCCAATGAGCACCAGGACATGCAGGATGTGGAGGAGCGAGTGGAC  
TCCTTCAAGTCTTTTGCCAAGAAAATGGATGATAGTGTTCATGCAGTTGAC  
GCACGTGACCTCGGAACGGTCCGGAACATCTAGGGGGTTTTAGGAAGG  
AATTCCAGCGTCTGGGGAACGCTTTCCAGTCCATTAGTCAGGCCCTTCATG  
CTGGACCCTCCTCATAGCTCCGAAGCTCTCAACAATGCCATCTCGCAC--  
-----  
-----  
-----  
-----ATCTGCTTCCCCTTTGTGTTACCTCCGTCAAGAACA  
GCTCCACCTGGACATACGGCACGCTCACCTGCAAAGTCATCGCCTTCCTG  
GGCGTGCTGTCTGTTTTCACACGGCCTTCATGTTATTCTGCGTCAGCGT  
GACCCGCTACCTGGCGATAGCCCACCACCGCTTCTACACCAAACGGCTGA  
CCTTCTGGACCTGTCTGGCCGTATCTGCATGGTGTGGACGCTGTCGGTG  
GCTATGGCCTTTCCCTCCAGTACTGGACGTGGGGACTTACTCATTTCATCAG  
AGAGGAGGACCAGTGCACCTTCCAGCATCGCTCCTTTCGAGCCAACGACT  
CGCTGGGCTTCATGCTGCTGCTAGCCCTCATTCTGCTGGCCACACAGCTG  
GTCTACCTCAAGCTCATCTTCTTTGTCCACGATCGCCGGAAGATGAAGCC  
CGTCCAGTTTCGTACCCGCCGTCAGCCAGAACTGGACCTTCCACGGGCCAG  
GGGCCAGCGGGCAGGCGGCTGCTAACTGGCTGGCGGGTTTTCGGGAGAGGC  
CCGACCCCGCCACCCTGCTGGGCATCAG-CAGAACACCAACCGGCGGG  
CCGCAG-CGGCTCCTGGTGCTGGACGAGTTCAAGACGGAGAAGAGGATCA  
GCAGGATGTTTTACATCATGACCTTCTTCTTCTTCTGCGACTGTGGGGCCT  
TACCTGGTGGCCTGCTATTGGAGGGTGTGGCC--AGGGCCCGCTGTGCC  
CGGCGGCTACCTGACGGCGCGTGT--GATGAGCTT-----GCCAGC--  
-----GCCAAATCCCAGTTT  
CACCTGGCGTAGGGACTGGTCTTGGCACGGAGC--GCAGCGTTCCTACT  
TAGTAACAGCTTACTATCCCCACAACAACCGAAGAGCCCACAGTTG--  
CTCCCCACAGCGATGGTTTGTACCC--CAGCCAACAACCGACTGGAC  
TTTGCCGCTCGGCATACGATGCCGCCGCGCTGCGGATTTTGCCGGCAA  
CGCAGCCACTTTGCTTTCCTAT--GCTGCTGGTGTGAAGGCGC-----  
TTCCCTGTCCACTGCAGGCTGCTCAAACAGACCTCTCGGCTATTATACT  
GACCCGCCAG--GTTGG--GGCGCCCGCACGCCACCACAGTACTTC--  
-----AGCAAATCTAGTTTCAAGTCTCTCTTCTGCTGGTCCACAAAACACCA  
TTGGGGAAGAAGTGGCA--CC--TCCTACCAGC-----CGGAT  
GC--TGGA--GACAC--CCTCTCTACAGATAGATCTCCA--AT--  
AGACGCACCAGACGAA--ACAAAACCAAAGACTT-----GTCCGA--  
-ATCCAACCTGGATAGAG--ACGCCGTCTCAATAAAGTCAATCGATTCA  
AGCGATTCTGGAATCTTTG--AGCAAGCAAAAACGAAGAAGAATTTCTCC  
TCCCCTACACCA-----GTTTTAGAGGC--T-TCCCCTGAAAT



CGTTACCACAACAGGTTGATCCTGAACGAGGCTGAGGTCATCTTGGCGTT  
GGCACAGGAGTTTTGAGATGAGGGTGGTGACTGTGTCTTGGAGGACAAA  
CCTTCTCCAGCATCGTGCAGGTGATCAGTGGTGCCGCCATGCTAGTTAGC  
ATGCATGGAGCTCAGCTCATCACCTCAATCTTCTCCTCCTCCAGGGGTGCGGC  
TGTGGTGGAACTCTTCCCCTACGGAGTCAACCCTGAGCAGTACACCCTT  
ACAAAACATTGGCCTCCTTGCCAGGCATGGACCTTCAGTATGTGGCCTGG  
AGGAACACCATGGAGGATAACTCTGTGGCCTACCCAGGCAGACCCTGGGA  
CCAGGGGGGCATCGCTCACCTTGATAAGGACGAGCATGAGCGCATCCTGG  
CCAGTAGTGAGGTGCCAGGCACCTGTGTTGAGTAATCCGGAATGGCTC  
TTCCGCATCTACCAAGACACCAGTTGACATCCCCCTCCCTGCTGGAGGT  
TCTTAG---GGAGAGCCTGAAA---ACCAGACCTAACCTGAAGAA---GA  
CCAAACCTGCCAGCACTGTTTCATCCAGGGAGGGTCAGGGAGCCTCAGTGC  
CAGACTTCGGTCCAGACTATTAATGAAGCCAAGCTCACAGTCTCCTGGCA  
GATCCCATGGAACCTCAAGTACTTGAAGGTANNNNNNNNNNNNNNNNNNNNNNNNNNNNNNNNNNAAGAGAGAC  
CCCAGCAAGG

GAACCTTGGAGGATCAAATCATCCAAGCCAACCTGCCCTTGAGGCTTTT  
GGTAATGCCAAAACATGAGGAATGACAACCTCATCACGCTTTGGCAAATT  
CATCAGGATTCACTTTGGAACCTCCGGCAAGTTATCCTCAGCAGACATAG  
AGACGTACCTTCTGAAAAGTCCCCTGTACCTTCCAGCTCAAATCAGAA  
AGGAACTACCATATCTTCTTTTCAAGATCTTGTCCAATCACAAGCCAGAGCT  
GTTGGACATGCTATTGATTACCAACAACCCGTATGACTACTCCTACATCT  
CCCAAGGAGAGGTAACAGTAGCATCTATCAATGATTCTGAAGAGTTGGTG  
GCCACTGACAGTGCCTTTGATGTCCCTTGGCTTTACTCCAGAGGAGAAAAT  
GGGGTCTACAAGTTGACAGGCGCCATAATGCATTATGGCAACATGAGGT  
TCAAGCAAAGCAGCGTGAGGAACAGGCAGAGCCTGATGGCACCGAAGCG  
GCAGACAAGTCGGCTTACCTAATGGGGCTGAACTCTGCAGATCTTGTGAA  
AGGACTCTGCCACCCCAGGGTCAAGGTGGAATGAGTATGTCACCAAAG  
GGCAGGGTGTGGATCAAGTCTATTAC-----  
-----  
-----  
-----  
-----  
-----  
-----  
-----  
-----  
-----  
-----  
-----  
-----  
-----  
-----  
-----  
-----  
-----  
-----

-----TACCTGAT  
CTACGCCTCCTTCTCCTTCATGGGATGTTTACAAATCAGTGACGGATCTA  
ACGTGGTCAACCTGTAGCCAGCAACTCCCCAGCGTGTCTACGCAGTG  
ACTCAGCAGAAGTACTTCAGTAACTACAGCCCAGGATGATTGGGTTCTACAT  
WTACGAGCCCATCGAGTACTGGAACCTCCACAGTGCAGGAGCATCTCAAAA  
CGCTGGGCCACGGCTTAAACAAGATCTCCTGGATGGACAACCTACTTCCAC  
TACCTAAAGGTGGTGAACGTGAGCGCCTCGACCAAGAGTGACTTCATCAG  
CATCCTCAAAGGCTCCTTCCTGCGGAGCCCGGAGTACCAGCACTTCACGG  
AGGACATCATCTTCTCCAAGA---ATGGCG-----ATGAGTAC  
GACATCATCGCGTCCAGGATGTACCTGGTGGCGGAACCACAGAGAAAAC  
GCGGGAGGAAGTGGTGGAGCTGTTGGAGAGGCTCCGCCCCCTCTCGCTCA  
TCAACAGCATCAAGTTCATCGTCTTCAACCCACCTTYGTTTTTCATGGAC  
CGCTACAGCTCCTCAGTTCATCTCGCCATCCTCACCTCGGGCTTCAGCGT







CAATCATCAATATGAAGCCCCCAGCCATCTCCCAATATCAGACACCCCTG  
TTCGCTGTGAGCTGTTCTAGTCACCGCTGTCCTCCTCCTTCTATCCCTCCC  
TGTCCTAGCTGCCGGAATTACAATGCTTCTCACCGACCGAAACCTCAATA  
CAACATTCCTCGACCCGGCGGGGGAGGAGACCCCATTTCTCTACCAACAC  
CTGTTCTGATTTTTTCGGGCACCCCGAAGTCTACATTCCTAATCCTCCCAGG  
CTTTGGCATGATCTCTCATATCGTCGCCTACTACTCGGGGAAGAAAGAAC  
CTTTCGGGTACATGGGAATAGTCTGAGCCATGATGGCCATCGGACTCCTA  
GGCTTCATCGTCTGAGCGCACCATGTTCACTGTTGGGATAGACGTAGA  
TACTCGAGCATNNTTCTGGAGAGGAACCTCCATCCGTCCNACTGCC TGGGCA  
TGCTGCTCCTCTCTGACGCCCACCAGTGCACCAAGCTGTCCGAGCTGTCC  
TGGGGCATGTGCCCTCAGTAAC TTTACCGCCATTTGCAAGACCGAGGACTT  
CCTGCAGCTGCCCAAAGACATGGCGGTCCAGCTGCTGTCCCACGAGGAGC  
TGGAGACGGAGGACGAGAGGCTGGTCTACGAGGCCGCCCTCAGCTGGGTCT  
A ACTACGACCTGGATAGACGACACTGTCACCTTGCCAGAGCTGCTGAGGAC  
AGTCCGTCTGGCCCTGCTGCCCGCCATCTTCCTCATGGAGAACGTCWCCA  
CAGAGGAGCTGATCAACGCGCAGACCAAGAGCAAGGCACTGGTGGACGAG  
GCCATCCGCTGCAAGCTGAGGATCCTGCAGAACGAGGGCGTGGTCAACAG  
CCCGCTGGCCAGGCCCAGGAAGACCAGCCACGCCCTYTTCTGCTGGGTG  
GGCAGACCTTCATGTGCGACAAGCTCTACCTGGTGGACCAGAAGGCCAAG  
GAGATCATCCCCAAGCGGACATCCCCAGCCCCAGGAAGGAGTTCAGCGC  
CTGCGCCATCGGCTGCAAGGTCTACATCACCGGAGGCC--GGGGCTC-TG  
AGAACGGGGTTTTCCAAGACGTTTTGGGTCTACGATACGTC CCACGAGGAG  
TGGTCGAAGGGCGGCCCATGCTCATCGCCCGGTTCCGGCCACGGCTCAGC  
AGAGCTGAAACACTGCCTCTACGCGGTGGGCGGACACACGGCCGGATCAG  
GCTGCCTCCCCGCTTCCCCCTCG-----  
-----  
-----  
-----  
-----  
-----  
-----  
-----  
-----  
-----  
-----  
-----  
-----  
-----  
-----  
-----  
-----  
-----  
-----  
-----  
-----

-----AGGGATCCCAGTAAGGGAACCTTGAGGATCAAATCAT  
CCAGGCTAACCTGCACTGGAGGCTTTCGGCAATGCCAAAACATTGAGAA  
ATGACAACCTCGTCACGCTTTGGAAAATTCATCCGGATTCAC TTTGGAACC  
ACTGGCAAGTTGTCCTCTGCAGACATAGAGACTTACCTTCTGGAAAAGTC  
ACGAGTCAC TTTT CAGCTCAAGTCAGAGAGGAACTATCATATCTTCTTCC  
AGATCTTGTCCAATCAAAGCCAGAGCTTTTGGACATGCTTTTAAATCACC  
AACAATCCATATGACTACTCCTACATCTCCCAAGGAGAGGTAACAGTAGC  
ATCCATCAATGATTCTGAGGAGTTGATGGCCACTGACAGTGCATTTGACG  
TGCTTGGCTTTACTCAAGAGGAGAAAATGGGAGTCTACAAGTTGACAGGT  
GCAATCATGCATTTACGGCAACATGAGGTTCAAGCAAAGCAGCGAGAGGA  
GCAGGCAGAGCCTGATGGCACTGAGGCTGCTGACAAGTCAGCTTACCTAA  
TGGGGCTGA ACTCTGCAGATCTAGTCAAGGGGCTCTGCCATCCCACGGTT  
AAGGTTGGCAATGAGTTTGTCACTAAAGGGCAGGGAGTAGACCAAGTCTA  
CTACCCCAACAAGGAGGCTTCAAGTGCAGGAGTGCGGCAAGCACTACA

ACACCAAGCTGGGATACAAGCGACATGTGGCCATGCACTCGGCCACGGCG  
GGGGACCTCACCTGCAAAGTGTGCATGCAGAGCTACGAGAGCACGCCCGT  
GCTGCTGGAGCACCTCAAGAGCCACTCGGGGAAATCCTCGGGGGCGCCA  
AGGAGAAGAAGCACCCATGCGACCCTGTGACCGCCGCTTCTACACCCGC  
AAGGATGTGAGACGGCACATGGTGGTCCACACGGGCCGAAAGGACTTCCT  
GTGCCAGTACTGCGCCCAGCGCTTTGGCAGGAAGGACCACCTGACGCGAC  
ACGTTAAGAAGAGCCACTCGCAGGAGCTGCTGAAGATCAAGACGGAGCCT  
CCGGATATGTTAGGGCTTTTAGGGTCCGGTTCCCCACCTTGCTCTGTCAA  
GGAGGAGCTCAGCCCTATGATGTGCAGCATGGGTCCCAACAAAGACCCTA  
TGATGGGCAAGCCCTTCCCCAGCGGGACCCCTTCCCGATGGGCATGTAC  
AACCTCACCAC-----CTCCAGGCCATGTCCAATCCTGGGGTGGGTCA  
CCCG-----CACCCCTCCCTGATGCCCGGTCCCTGTCTGCAGCTATGG  
GCATGGGCTGCCACATGGAGTACCTGATCTACGCCCTCCTTCTCCTTCATG  
GGATGTTTACAAATTAGCGACGGATCCAACGTTGTCAACCTGTTAGCCAG  
CAACTCCCCCAGTGTGTCTGACGCTCTGACGCAGCAGAAGTACTTCAGTA  
ACTACAGCCCTGTGATCGGTTTTCTACATCTATGAACCCATCGAGTACTGG  
AACTCCACGGTGCAGGAGCACCTGAGAACTCTGGGCCAGGGCTTCAACAA  
GATCTCCTGGATGGACAATACTTCCACTACCTGAAGGTGGTGAACGTGA  
CCGCCTCCACCAAGAGCGACTTCATTGCCATCCTCAAAGGCTCCTTCCTG  
AAGAGCCCGGAGTACCAGCACTTCCCGAGGACATCATCTTTTTCGAAGA-  
--AAGCG-----AGGAGTATGACATCATCGCATCCAGGATGT  
ACCTTGTGGCGCGGACCACGGAGAAGACCCGGGAGGAGGTGGTGGAGCTG  
CTGGAGAGGCTCCGCCCCCTCCTCCATCAACAGCATCAAGTTCATCGT  
CTTCAACCCACCTTCGTCTTCATGGACCCTTACAGCTCTTCAGTCATAT  
CACCCATTCTCACCTCAGGCTTCAGTGTGCTCACCATCCTCATCCTCACC  
TTCTTCTGGTCAATCAACCCCTGGGGAACCTTTTGGTTGATCCTGACGGT  
GACCTCTGTGGAGCTGGGTGTTCTAGGCCTGATG-----

-----  
-----  
-----  
-----  
-----  
-----  
-----  
-----  
-----  
-----

-----CCCC  
TATGTCTGATGTTTGTGGATGAGGCAGACCACGAGACACTCACTGCTGTC  
CTGGGGCCCGTCGTCGCAGAGCGTAACGCTATGAAGCAGAGTCGACTCAT  
ACTCTCTCTGGGCGGCCCTGCCTCGCTCCTTCCGCTTCGAATTCGAGGCA  
CGGGATACGACGAGAAGATGGTGCCTGATGTGGAGGGCTTGGAGGCCTCA  
GGCTCCACCTACATCTGCACTCTGTGTGACTCCACCCGGGCGGAGGCCTC  
TCACAACATGGTACTGCACTCCATCACCAGCAGTACCACGAAAACCTGG  
AGCGCTACGAAATATGGAGGACCAATCCGTTTGGCTGAGTCCGCAGACGAG  
CTGCGAGACCGGGTCAAAGGAGTCTCCGCCAAGCCCTTCATGGAGACCCA  
GCCCCTCTGGATGCA-TGCACTGTGATATGGGTAATG-----

-----  
-----  
-----  
-----  
-----  
-----  
-----  
-----  
-----  
-----

-----TCGTACACG  
ATCGAGATGGGCTCCAAAAGGCCTCAATGGAACGAGAGTCCYSAGCCTTT  
CTCCTGCTCCGTCGAAGACCCCACCAARCAGACAAAGTTCAAAGGCATCA  
AGACCTACATATCGTACCGGTSACCCCCAGCCACAYGGGGCGGCTGTG  
TACCGCCGGTACAAGCACTTTGATTGGCTGTACAACCGCCTGCTGCACAA  
GTTACCGTCATATCCGTGCCSCACCTGCCSGAGAARCAGGCCACGGGGC  
GYTTCGAGGAGGATTTCAATTGAGAAGCGCAARCGGCGRCTGGTGCTGTGG  
ATGGACCACATGACCAGCCACCCGGTSCTGTCSAGTACGAGGGCTTCGA  
GCACTTCCTCATGTGCGCCGACGACAAGCAGTGGAAGCTGGGCAAGCGGC  
GGGCGGAGAAGGACGAGATGGTGGGCGCCATTTTCATGCTGACCTTCCAG  
ATCCCCAASGAGCACCAGGACCTKCAGGATGTGGAGGAGCGGGTGGACTC  
CTTCAAGTCGTTTCGCCAAGAAAATGGACGACAGTGTSATGCAGCTGACGC  
ACGTGGCSTCGGAGCTGGTGAGGAAACATCTGGGGGGTTTCAGGAAGGAG  
TTYCAGCGTCTGGGGAACGCCTTCCAGTCCATCAGTCAGGCGTTTCATGCT  
GGACCCYCTCACAGCTCCGAGGCCCTCAACAACGCCATCTCGCAC----

-----GCCAAATCTCGCTTTCA  
CCCTGGCGTAGGGACTGGTCCTGGCACAGACC--GCAGCGTCCCCTTA  
GTAACAGCTTGCTATCCCCGCAACAAACCGAGGAGCCCGCGGTTG--GT  
TCCCCGACGCGATGGTTTGTCAACC--CTGCCAACAACCGACTGGACTT  
TGCCGCTCGGCATACGATGCTGCCGCCGCTGCAGACTTCGCCGGTAACG  
CGGCCACCTTGCTGTCGTACGCGGCGGCTGGAGTGAAGGCC--TT  
CCCCGTCCACGGCAGGCTGCTCAAACAGACCTCTCGGGTATTACGCAGA  
CCCGTCAG--GCTGG--GGCGCCCGCACACCACCGCAGTACTGT----  
----ACCAAGTCCAGCTCGGTTCTCTCTTGCTGGCCTACAAATACCGTT  
GGGGGCAGAACGGGCC--CCTCCAGCTACCTGG-----CCGAGGA  
--TGGA--GACGC--GCTGCCACAGAGAGGTCTCCG--AT--TG  
GCGCGTCAGACGAA--ACCAAACCTAAAGACTT-----GACCGA--G  
TCCAGCTGGATAGAG--ACGCCGTCCTCAATTAAGTTCGATTGATTCAAG  
TGATTCTGGAATCTTTG--AACAAGCAAAAAGGAGAAGAATATCTCCTT  
CTGCCACACCA-----GTTTCGGAGGCTGTGTCCCGTTGAAATCC  
GAG-----ACAGGCGAAGTCACCGAAAGAGAAGTGGCTTTGGGGAT  
AAATCCGTTTCGACAGCGGGATGGGCGCCTTCAAAATCAACCACAGCTCGC  
ATGATCTCGGTTCCGG--TCAAACGGCGTTTTCTCCAAGCG--CCC

GGCTAC---GCAGCTGCTGCGCTCGGA---CACCACCA-----CCACCC  
GACACACGT CAGCTCC---TACTCCACCGCGGCTTCAACTCCACCCGGG  
ACTTTCCTCTCAGAAATCGGGGCTTCGGAGACGCCACCAG-----  
--TGCGCAACACAGTCTCTTCGCATCCGC---AGCGGGAAGTTT---T--  
----GCAGGGCCACATGGACTCAGATGCCGCGGGGCACCTGCTCTTCC  
CSGGACTTCACGAG---CAAGCCGCGAGCCACGCGTCCTCCAATGTTGTT  
AACAGTCAAATGCGCTTGGGCTTTTCGGGGGACATGTACGGGCGGGCCGA  
CCAGTACGGCCACGTTACCAGCCC GCGTT---CCGACCACTATGCTTCGA  
GCCAGCTGCACGGCTATGGCCCTATGAACATGAATATGGCCGCA---CAT  
CACGGAGCGGGGCTTCTTCCGTTACATGAGGCAGCCGATTAACAAGA  
GCTGATCTGCAAGTGGATCGAACCCGAGCAACTATCGAATCCGAAAAAGT  
CGTGCAACAAAACCTTTTAGCAGATGCACGAGCTGGTGACCCATTTGACG  
GTGGAGCATGTGGGGGACCGGAGCAGTCAACCATATTTGCTTCTGGGA  
WGAGTGC GCGGAGAAGGAAAACCATTCAAAGCCAAATACAAACTTGTGA  
ACCACATCAGAGTGCACACCGGGGAGAAGCCATTTCCATGTCCCTTTCCC  
GGCTGTGGCAA-

>Stylephorus chordatus

AGTCTTCTCATTTCGAGCTGAACTAAGCCAACCCGGCGCACTTCTAGGCGA  
TGATCAGATTTATAATGTTATTGTAACCGCACATGCCTTTGTAAATAATTT  
TCTTTATAGTAATGCCCTAATAATTGGAGGATTTGGTAACTGACTAGTC  
CCATTAATAATCGGGGCCCTGATATAGCCTTTCCCGTATAAATAATAT  
AAGTTTCTGACTCCTCCCTCCATCCTTCTTACTGCTTCTTGCATCTTCTG  
GAGTTGAAGCAGGGGCAGGAACAGGCTGAACTGTCTACCCCTCTAGCA  
GGCAATCTTGCCCATGCCGCTGCTTGTGGATCTTACTATCTTTTCTCT  
CCACTTAGCAGGAATCTCATCCATCCTAGGGGCAATCAACTTTATTACCA  
CAATTATTAATAATAAAACCCCGCCATCTCACAGTATCAAACCTCCCTA  
TTCGCTCTGAGCCGTTTGTAGTAACAGCAGTTTCTACTCCTCCTCACTCCC  
AGTACTCGCAGCAGGCATCACGATATTACTTACAGACCGCAACCTAAACA  
CCTCTTTCTTTGATCCTGCAGGAGCGGAGACCCCATCCTATATCAACAC  
CTATTCTGATTCTTCGTCATCCTGAAGTTTACATTCTAATTCTCCCGG  
ATTCGGAATAAATTTCCCATATCGTTGCCTACTACTCAGGCAAAAAAGAAC  
CATTCGGATATATAGGCATGGTTTGGAGCTATAATAGCCATCGGCCTACTA  
GGCTTATTGTATGAGCTCACCATATTTACAGTCGGAATAGACGTAGA  
CACTCGAGCATANNNNNNNNNGAGAAACCTTACCCACCAACTGCCTGGGCATGCTCC  
TGCTGTCCGACGCCACAGTGCACCAAGCTGTTCGGAGCTGTTCGTGGAGC  
ATGTGCCTGAGCAACTTCCCCGCCATTTGCAAGACGGAGGACTTCTCCA  
AATGCCCAAAGACATGGTCGTGCAGCTCCTGTCCCACGAGGAGCTCGAGA  
CGGAGGACGAGAACTCGTTTACGAGGTCGCGCTCAACTGGGTGACCTAC  
GACCTGGAAGGGAGGCACTGCCACTTGCCGGAGCTGCTGAAAACAGTCCG  
CCTGGCCCTGCTCCCCGCAATCTTCTCATGGAAAACGTGTCCATGGAAG  
AGCTGATCAACGCCAGATCAAGAGCAAGGCGCTGGTTCGACGAGGCCATC  
CGCTGCAAGCTGAAGATCTTGCAGAACGACGGCGTGGTCAACAGCCCTG  
TGCCCGTCCGAGGAAAACAGCCACGCGCTGTTCTGCTGGGAGGGCAGA  
CGTTTATGTGTGACAAGCTTTACCTGGTGGACCAGAAGGCCAAAGAGATT  
ATCCCGAAGGCTGACATACCCAGCCCCAGAAAGGAGTTTCAGCGCCTGTGC  
CATCGGCTGTAAGGTTTACATCACGGGCGGGC--GGGGCTC-CGAGAACG  
GCGTGTCCAAAGACGTGTGGGTGTACGACACGGTGCACGAGGAGTGGTCC  
AAGGCGGCGCCATGCTCATAGCCAGGTTTGGTTCACGGCTCCACGGAAC  
GAAGCACTGCCTGTACGTGNNNNNNNNNNNNNNNNNNNNNNNNNNNNNNNNNNGGA  
GGATTACATAGTGGTCTTCTCTCGTTCC  
ACCACCAGGCTGATCCTAAATGAAGCAGAAGTGCATGGCACTGGCCCA  
GGAGTTTCAGATGAGAGTCATTACGGTCTCCCTGGAGGAGCAGTCTTTTA  
CCAGCATCGTTCAGGTGATCAGCGGGCGTCCATGTTGGTTCAGCATGCAC

GGAGCTCAGCTGGTCGCATCGCTGTTTCTGCCTAGAGGGGCGGGCGGTGGT  
GGAGCTGTTCCCTACGCTGTGAACCCGGAACAGTACACCCCTTATAAAA  
CCCTCGCCTCCCTGCCAGGCATGGACCTCCAATATGTTGCCTGGAGAAAC  
ACTATGGAAGAGAACACGGTCAACCACCCAGACAGGCCCTGGGACCAAGG  
GGGCATCGTACACTTGGACAAGGAGGAGCAAGAGCGCATCCAGGCCAGCA  
AGGACGTCCCCAGGCACCTCTGCTGCCGTAACCCAGAGTGGCTCTTCAGA  
ATCTACCAGGACACTTGGTGGACATCCCTTCACTCTTGGAGGGGCTCAA  
GGCGGAAGGTCTCAAG---AGGAGGCCCGCTTGAAGAA---G---AAGC  
CAGCGAGCACGGTTACCCCGGACGGGTGAGAGAGCCCCAGTGCCAGACC  
TCCGTGCAGGCCGCAACGAGGCCAAGCTCACAGTCTCCTGGCAGATCCC  
GTGGAACCTGAANNNNNNNNNNNNNNNNNNNNNNNNNNNNNNNNNNNNNAAGAAGGATTCAGC  
AAAGGAACCCCTGGAAGATCAAAAT  
CATCCAGGCCAACCCTGCGTTGGAGGCCCTTTGGTAATGCCAAAACATTGA  
GAAATGATAACTCCTCCCGTTTTGGGAAATTCATCCGCATTCACTTTGGA  
ACCAGCGGCAAGTTAAGCTCTGCTGACATTGAAACTTACTTGCTGGAAA  
GTCAAGAGTCACTTCCAGCTGAAAGTCGGAGAGGAACTATCACATCTTCT  
TCCAGATCTTGTCCAATCAGAAGCCAGAGCTGCTGGACATGCTGTTGATC  
ACCAACAACCCATATGACTACTCCTACATCTCCAAGGAGAGGTAACGGT  
AGCGTCTATCAATGACTCAGAGGAGCTCATGGCCACTGACAGTGCCTTTG  
ATGTTTTGGGCTTCACTGCAGAAGAGAAGATGGGAGTGTACAAGTTGATT  
GGGGCCATTATGCACTATGGCAACATGAGGTTTTAAGCAGAAGCAGCGCGA  
GGAACAGGCAGAACCAGATGGGACGGAGGCTGCTGATAAATCCTCTTACT  
TGATGGGTCTGAACTCTGCAGATCTCATCAAAGGATTATGCCACCCCAGG  
GTCAAGGTAGGAAATGAATANNNNNNNNNNNNNNNNNNNNNNNNNNNNNNNNNNNNCCCAACAAGGAGG  
CCTTCAAATGTGAGGAA  
TGTGGCAAGCACTACAACCAAGCTGGGATACAAGCGCCATGTGGCCAT  
GCACTCCGCCACGGCGGGAGACCTCACCTGCAAGGTGTGCATGCAGAGTT  
ACGAGAGCACCCCCGTGCTGCTGGAACACCTGAAGAGCCACTCCGGGAAG  
TCCTCGGGCGGGCGCCAAGGAGAAGAAGCACCCGTGCGACCACTGCGACCG  
CCGCTTCTACACCCGCAAAGACGTGAGGCGACACATGGTCTGCCACACCG  
GCCGCAAGGACTTCTGTGCCAGTACTGCGCCCAGCGCTTCGGCAGGAAG  
GACCACCTGACCGGACACGTGAAGAAGAGCCACTCGCAAGAGCTGCTGAA  
GATCAAGACGGAGCCTCCCGACATGCTGGGGCTCCTGAGCTCTGGCTCGC  
CGCCGTGCTCCGTCAAGGAGGAGCTCAGCCCCATGATGTGCAGCATGGTT  
CCCAACAAGACCCCATGATGGGCAAGCCCCTCCCGAGCGGCACCCCTT  
CCCCATGGGTATGTACAACCCCAACCAC-----CTCCAGGCCATGTCCA  
ACTCCGGGGTGGGCNNNNNN-----  
NNNNNNNNNNNNNNNNNNNNNNNNNNNNNNNNNNNNNNNNNNNNNNNNNNNNNNNNNNNN  
NNNNNNNNNNNNNNNNTTCATGGGATGTTTACAAATCAGCGACGGA  
TCCAACATCGTAAACCTGCTGGCGAGCAACTCTCCGAGCGTTTCTTACGC  
TACCACCCAGCAGAAGTACTTCAGCAACTACAGTCCCCTGATTGGATTCT  
ACATTTACGAACCTATCGAGTACTGGAACTCCACGGTGCAGGAGCACCTG  
AAGACACTGAGTCACGGTTTTCAACAAGATCTCCTGGATGGACAACCTCTT  
CCATTACCTGCGGGTGGTGAACGTGAGCGCGTCGACAAAGAACGACTTCA  
TCACCATCCTTAAGGGTTCCTTCTCCTGCGCAGCCCCGAGTACCAGCACTTC  
ACGGAGGACATCATCTTCTCCAAGG---ACCCCGAAAGCG-----ACGA  
GTACGACATCATCGCCTCGCGCATGTACCTGGTGGCGAGGACCACGGAAA  
AGAAGCGAGAGGAGGTGGTGGAGCTCCTGGAGAAGCTCCGCCCACCTGATG  
CTCATCAACAGCATCAAGTTCATCGCGTTCAACCCACTTTTGTATTCAT  
GGACCGCTACAGCTCCTCTGTGCTCTCCCCGATTCTGACCTCGGGCTTCA  
GCGTGCTCACCATCCTCATCCTCACTNNNNNNNNNNNNNNNNNNNNNNNNNNNNNNNNNNNN  
NNNNNNNNNNNNNNNNNNNNNNNNNNNNNNNNNNNNNNNNGGCCACCACCCATTTCGAGTGGCG  
GCCCCCCTCGGGAACGTCTCGGCCGCGTGCCACGTGGGCATCGTCGACG





-----  
-----  
-----  
-----  
-----  
-----  
-----

-----NNNNNNNNNNCTTTCACCTGGCGTGGGGACTGGTCCTGGCACGGAG  
C---GCAGCGTCCCACTCGGCAACAGCTTGCTATCCCCGCAGCAAACCGA  
GGAGCCCACTGTTGCCACCCCCCGCAGCGATGGTTTGTCAACC---CTG  
CCAACAACCGACTGGACTTTTGTGCTCGGCATACGACGCCGCT-----  
---GATTTCCGCGGTAACCGGCCACCTTGCTGTCTACGCAGCGGCCGG  
AGTGAAGGCTC-----TTCCCCTGCCGACGGCAGGCTGCTCCAACGGC  
CTCTTGGCTATTACGCAGACCCGTCAG---GCTGG---GGAGGACGCACG  
CCGCCGAGTACTGTGGCGTAAATAGCAAATCCAGCTCGGTCTTTTCCTG  
CTGGCCCGCTAACTCTATCGGCGGCAGAGCCGGCA---CC---AACTACC  
TGG-----CTGAGGA---GGGA---GACTC---CATCCCGACAGAG  
AGGTCACCC---AT---CGGCGGCTCGGAGGAG---ACCAAACCCAAAGA  
CATGAC---TTCAGA---GTCGAGCTGGATAGAG---ACGCCGTCTCCA  
TTAAGTCCATCGATTTCGAGCGATTCTGGTATCTTTG---AACAGGCCAAG  
AGGAGAAGGATCTCCCCTTCNNNNNNNNNN-----  
NNNNNNNNNNNNNNNNNNNNNNNNNNNNNNNNNNNNNNNNNNNNNNNGAAGTCACAGAGAGAGAAGTC  
GCGTTGGGGATAAATCCTTTTCGAGACGGAATGGGCGCCTTCAAATAAA  
CCACAGTTCTCACGACATTGGCTCCGG---ACAAGCTGCATTCTCATCCC  
AAGCA---TCCGGCTAT---GCAGCGGCTGCCCTGGGA---CATACCA-  
-----TCACCCGACTCATGTTAGCTCT---TATTCCACAGCGGCTTTCAA  
TTCTACACGGGACTTTCTCTTCAGAAATCGTGGGTTTGGAGACGCCACCA  
G-----TGACAGCACAGTTTGTTCGCCCTCCGC---CGCCGGA  
AGTTT---T-----GCTGGGCCACATGGACACTCCGATGCCACGGGGCA  
CCTGCTCTTCCAGGGCTTACAGAG---CAAGCCGCCAGTCATGCTTCGT  
CTAATGTTGTTAACGGTCAGATGCGACTGGGCTTTTCCGGAGACATGTAC  
GGTCGGGCCGACCAGTATGGCCACGTTGCAAGCCCAAGGT---CCGACCA  
TTATGCTTCAACACAGTTGCATGGCTATGGCCCCATGAACATGAATATGG  
CTGCA---CACCACGGAGCAGGGGCCCTTCTTTCGATACATGAGGCAGCCG  
ATTAACAAGAGCTCATCTGCAAGTGGATCGAACCGGAGCAATTGTCGAA  
TCCGAAGAAGTCGTGCAACAAAACCTTTTAGCACGATGCATGAGTTGGTAA  
CCCATCTGACAGTGGAGCATGTGGGGGGACCCGAACGCTCCAACNNNNNNNNNNNNNNNNNNNNNNNNNN  
NNNNNNNNNNNNNNNNNNNNNNNNNNNNNNNNNNNNNNNNNNNNNNNNNNNNNNNNNNNNNNNNNNNNNN  
NNNNNNNNNNNNNNNNNNNNNNNNNNNNNNNNNNNNNNNNNNNNNNNNNNNNNNNNNNNNNNNNNNNNNN

>Sudis atrox  
AGCCTGCTCATCCGAGCTGAATTAAGCCAACCAGGCGCCCTTCTTGGAGA  
CGACCAAATTTATAATGTAATCGTAACAGCACACGCCTTTGTAATAATTT  
TCTTTATAGTAATAACCAATCATGATTGGAGGATTTGGAAACTGGCTTATT  
CCCCTTATGCTCGGGGCCCCAGACATAGCATTCCCCGAATAAACAACAT  
AAGCTTCTGACTTCTTCCCCCTTCTTTCCTTCTGCTCCTAGCCTCCTCCG  
GAGTTGAATCTGGAGCCGGAACCGGATGAACGGTTACCCTCCCCTGGCC  
GGGAACCTCGCCACGCCGGAGCATCCGTTGACCTAACTATTTTCTCTCT  
TCATCTAGCAGGAATCTCCTCAATCTTGGAGCCATTAACCTCATCACAA  
CAATCATCAACATGAAACCCCCGCTATTTCCCAATACCAAACACCTCTA  
TTTGTATGATCCGTCCATTAACCGCTGTCCTTCTGCTCTTATCCCTGCC  
TGTCCTTGGCGGCTGGAATTACAATGCTACTGACAGACCGAAACCTAAACA  
CAACCTTCTTCGACCCCTGCAGGGGGAGGGGACCCAATTTCTCTACCAACAC  
CTATTCTGATTTTTTCGGCCATCCAGAAGTTTATATTTCTAATTCTACCCGG

ATTTGGAATGATTTCCACATTGTTGCCTACTACTCAGGCAAAAAAGAAC  
CTTTCCGATACATGGGAATGGTGTGAGCCATAATAGCCATCGGCCTACTT  
GGGTTCATCGTATGGGCCACCACATGTTACGGTTGGGATAGACGTAGA  
TACACGAGCANNNTTCTCGAGAGGAACCTGCACCCATCCAACCTGCTTGGCAT  
GCTGCTACTATCAGATGCCACCAGTGCACCAAGCTGTCAGAGCTGTCCT  
GGGGTATGTGTCTCAGCAACTTCCCTGCCATCTGCAAGACGGAGGACTTC  
CTCCAGCTGCCCAAAGACATGGTGGTGCAGCTCCTGTCCCATGAAGAGCT  
GGAGACGGAAGATGAGAGACTGGTTTATGAGGCTGCCCTTAACTGGGTCA  
ACTATGACCTGGAGAGGAGACACTGCCACCTGCCAGAGCTGCTGAGAACC  
GTACGCCTGGCCTTGCTTCCCGCCATCTTCTCATGGAGAACGTCTCCAC  
AGAGGAGCTGATTAATGCCCAGGCAAAGAGCAAGGAGTTGGTGGACGAGG  
CCATCCGCTGCAAGCTGAAAATCCTGCAGAATGATGGTGTGGTCAACAGT  
CCCTGTGCCCGGCCAGAAAGACCAGCCATGCCCTTTTCTGCTGGGAGG  
GCAGACCTTCATGTGTGATAAGCTGTACTTGGTGGACCAGAAAGCCAAAG  
AGATCATCCCCAAGGCGGACATCCCCAGCCCCAGGAAGGAGTTCAGTGCC  
TGTGCCATTGGCTGTAAGGTATACGTGACAGGCGGGA--GAGGCTC-AGA  
GAACGGTGTGTCTAAAGACGTGTGGGTCTATGACACCGTACATGAGGAGT  
GGTCCAAGGCAGCACCCATGCTTATTGCCAGGTTTGGCCATGGCTCTGCT  
GAGCTCAAACACTGTCTCTATGTGGTTGGAGGACACACAGCAGCCACTGG  
CTGCCTCCCAGCTTCTCCGTCTGGATGAGTACATTGTAGTGTTCAGTCGT  
TCCACAACCAGGCTGATACTGAATGAAGCAGAGCTGATACTGGAACCTGGC  
CCAAGAGTTTTCAGATGAGGGTGGTTACAGTGTCCCTGGAGGAACAGTCTT  
TCCCCAGCATCGTACAGGTCATCAGTGGGGCGTCCATGTTGGTTAGTATG  
CACGGAGCTCAGCTCGTCACCTCACTCTTCTCCCTAGAGGAGCTGCTGT  
AGTAGAGCTCTTCCCCTATGCTGTGAACCCGGAACAGTACACCCCATACA  
AAACCCTAGCCTCCCTACCAGGCATGGACCTTCAATACGTTTCTGAGG  
AACACTATTGAGGAGAATACTGTACCCACCCAGACAGACCCTGGGACCA  
AGGAGGCATTGCCCATTTGGAGAAAGAAGAGCAGGAGAGAATCCTAGCCA  
GCAAGGACGTCCCCAGGCACCTATGCTGCCGCAACCCAGAGTGGCTKTTT  
AGGATCTACCAGGACACTCTGGTGGACATCCCCCTTCTGGAAGTCCT  
CAA---GGAGGGCCTGAAG---ATGAGACCAAGCTTGAAGAA---GTCCA  
AACCAGCCAGCACAGTTCACCCGGGCGGGTCCGAGAACCCAGTGCCAG  
ACTTCAGTCCAAGCCACCAACGAGGCTAAACTCACAGTATCCTGGCAGAT  
CCCATGGAACCTTAAGTACCTGAT-GTGCAGAGGTTGAAGTACGAGGTAT  
GGATCAGAAAAAGGGACACAAGCWAGGGAACCCCTGGAGGATCAAATCATT  
CAGGCAAACCCTGCGCTGGAGGCTTTCGGTAATGCCAAAACATTGAGGAA  
TGATAATTCTTCCGCTTTGGAAAATTCATCCGAATCCATTTTCGGAACCA  
GTGGCAAACCTGTCTCTGCGGACATTGAGACCTACCTGCTGGAGAAGTCA  
CGGGTCACCTTTCAGCTCAAGGCAGAGAGGAACTACCACATTTTCTTCCA  
GATCTTGTCCAATGAAAAGCCAGAGCTGCTGGACATGATGCTGATCACCA  
ACAACCCCTATGACTACAGCTACATCTCCCAAGGAGAAGTAACCGTGGCT  
TCCATCAATGATTCGGAAGAGCTGATAGCCACCGACAGTGCCTTTGATGT  
GCTCGGCTTCACGCAGGAGGAGAAGATGGGAGTCTACAAGTTGGTAGGGG  
CCATTATGCACTATGGCAACATGAGGTTCAAGCAAAAGCAGCGCGAGGAA  
CAGGCCGAGCCTGACGGTACAGAGGCTGCCGATAAGTCAGCTTACCTAAT  
GGGGCTGAATTCAGCGGAYCTAATCAAGGGACTCTGCCACCCAGAGTTA  
AGGTAGGGAATGAGTACGTCACCAAAGGCCAGGGTGTAGATCAAGTCTAC  
TACCCCAACAGGGAGGCCTTCAAGTGTGAGGAGTGTGGGAAGCACTACAA  
CACCAAGCTGGGATATAAGCGCCATGTGGCCATGCACTCTGCCACGGCGG  
GGGATCTCACCTGTAAAGTGTGCATGCAGAGCTACAAGAGCACACCTGTC  
CTCTGGAGCACCTGAAGAGCCACTCGGGGAAGTCGTCTGGCGGAGCCAA  
GGAAAAAAGCACCCGTGCGACCACTGCGACCGCTTTTCTACACACGGA  
AGGATGTGAGACGGCACATGGTGGTCCACACGGGCCGAAAGGACTTCTCTG

TGCCAGTACTGTGCCAGCGCTTCGGCAGGAAGGACCACCTGACTCGCCC  
CGTGAAAAAAGCCCCTCGCAGGAGCTGCTGAAGATCAAGACGGACCCTC  
CTGACATGTTAGGTCTTTTAGCTTCGGGGTCACCACCTTGCTCTGTGAAG  
GAGGAGCTTAGCCCCATGATGTGCGGCATGGGTCCCAACAAACACCCAG  
GACGGGCAAACCTTTCCCCACTGGCGCCCCTTTCCGATGGGCATGTACA  
ACCCCCACCAC-----CTTCAGGCCATGTCTAATTTCTGGGGTGGGTAC  
CCC-----CACCCGTCCTGATGCCAGCTCCCTGTCTGCAGCTATGGC  
CATGGGC-----TATCTCATCTACGCCTCCTTCTCCTTCATGG  
GATGTTTACAAATCAGCGACGGCTCCAACGTGGTGAACCTGCTGGCGAGC  
AACTCTCCGAGCGTGTCTGACGCCCTCACGCAGCAGAAGTACTTCAGCAA  
CTACAGCCCGGTGATCGGGTTCTACATCTACGAGCCCATCGAGTACTGGA  
ACTCCACGGTGCAGGAGCACCTGAAGACACTGAGCCACGGCTTCAACAAG  
ATCTCCTGGGTGGACAACCTTCGTCCACTACCTGCGTGGGTGAACCTGAG  
CGCGTCTACCAAGGCCGACTTTGTGCGCCGTCCTCAAGGGCTCCTTCTG  
GGAGCCCCGTGTACCAGCACTTACCAGGACATCATCTTCTCCAAGA--  
-GCCACGAGAACA-----GCGACTACGACATCATCGCGTCGCGCATGTA  
CCTGGTGGCGCGCACCACCGAGAAGCGCCGCGAGGATGTGGTGGAGCTGC  
TGGAGAAGCTSCGTCCGCTGATGCTCATCAACAGCATCAAGTTCATCGCC  
TTCAACCCACCTTCGTCTTCATGGACCGCTACAGCTCGTTCGGTTCATCTC  
GCCCATCCTCACCTCGGGCTTACAGCGTGTCTACCATCCTCATCTCACCT  
TCTTCTCGTTCATCAACCCGCTGGGGAACCTGTGGCTCATCCTGACGGTC  
ACGTCCGTGGAGCTGGGCGTGTGGGCTGATGGGCTACCACACATTCGA  
GTGGAAGCCAGCCCTCAAGAACGTATCCCCATCCTGCCATGTGGGTATCA  
TCAATGGGCTTTCCGGGTGGACTGCCTCAGTGGATGACGTCCGTGCTGAC  
ACCATCACCCGTCGGTTCCGCTATGACGTGGCGCTTGTATCAGCCCTGAA  
GGACCTAGAGGAGGACATCATGGAAGGACTGAGGGAGTGTGGGCTGGAAG  
ACAGCGTTTGCACCTCAGGCTTCATTGTTATGATCAAAGAGTCTGTGAT  
GGCATGGGAGATGTCAGCGAGAAGCACGGTGGGGGGCCCGGATGCCTGA  
GAAGGCTGTGCGTTACTCTTTTACCATCATGTCTGTCTGTCCAGCCCG  
ACGGAGAGGAG-----GAGGCGGTT  
GTCATCTTACGGGAGCCAAAGCCCAACTCTGAACTGTCTGTAAACCCCT  
GTGCTGATGTTTGTGGACGAGTCTGACCACGAGACACTCACAGCTGTCC  
TGGGGCCTTTGGTAGCAGAGAGGAACCGGATGAAGCAAAGCCGACTCATC  
CTCCAGTGGGAAGCCTCCCCCGCTCCTTCCGCTTCCACTTCAGAGGCAC  
AGGCTACGATGAGAAGATGGTGCAGAGATGGAAGGCATGGAGGCCTCAG  
GCTCCACCTATATCTGCACTCTTTGCGACTCCACTCGGGCAGAAGCCTCT  
CACAACATGGTGTGCACTCTGTCACTCGCAGCCACGATGAGAACCCTGGA  
GCGCTATGAGGTATGGAGGACCAACCCCTTCTCGGAGTCTGCCACGGAGC  
TGCGAGATCGAGTCAAAGGGGTGTCCGCCAAACCATTTATCGAGACCCAT  
CCGACTATGGATGCATTACATTGTGACATAGGTAATGCCACTGAATTCTA  
CAAAATCTTCCAGGATGAGATTGGGGAGGTGTTCCAGAAGGC---CAAT-  
--CCTAGCCGAGAAGAACGGCGCAGCTGGAGGGCAGCCCTTGATAAACAG  
CTGAGGAAGAAGTTGAAGCTGAAACCAGTGATGCGGATGAATGGGAAC  
CGCCGAAGGCTGATGACCGAGGAGGCTGTAGAGGTGGTGTGTGAACTGG  
TGCCCTCAGAAGAGACGGGAGGCCCTGAGGGAGCTGATGGGGCTCTAT  
ATCCAGATGAAGCCGGTGTGGCGTGTACCTGCCAGCCAAGGAGTGCC  
TGACCAGCTGTGCGGCTACAGCTTTAACTCTCAGCGTTTTGCTGATCTCC  
TCTCTTCCACCTTCAAATACAGGTACGATGGGAAGATCACCAACTACCTG  
CACAAGACCCTGGCCATGTCCCTGAAATCATAGAGAGAGATGGCTCCAT  
CGGAGCCTGGGCCAGTGAGGGGAATGAGTCTGCGAACAAG-----  
-----  
-----  
-----



TGGGCTTCATGAG---CAAGCGGCGAGCCATGCGTCGTCTAACGTTGTAA  
ACAGCCAGATGCGACTGGGCTTTTCCGGGGACATGTACGGGCGGGCCGAC  
CAGTATGGCCACGTTACAAGCCCGAGGT---CCGACCACTACGCTTCGAC  
CCAACCTGCACGGCTATGGCCCTATGAACATGAATATGGCCGCT---CACC  
ACGGAGCAGGGGCTTCTTTTCGGTACATGAGGCAGCCGATCAAACAAGAG  
CTAATCTGCAAGTGGATCGAACCGGAGCAACTGTGCAATCCCAAAAAGTC  
GTGCAACAAAACCTTTTAGCACGATGCATGAGCTTGTGACCCACCTGACGG  
TGGAGCATGTGGGAGGACCCGAGCAGTCGAACCACATTTGCTTCTGGGAA  
GATTGTGCCAGGGAAGGAAACCATTCAAAGCCAAATACAAACTCGTAAA  
TCATATCAGAGTTCACACCGGAGAAAAACCGTTCCCGTGTCCATTCCCCG  
GCT-----

>*Symphurus atricaudus*

AGTGTTCATCATTGCAATTGAACTGAGTCAGCCCGGACCAATAATGGGGGA  
CGATCAAATTTACAATGTGGTGGTTACAGCACATGCCTTCGTAATAATCT  
TCTTCATAGTTATAACCCGTGCTAATTGGAGGCTTCGGAAACTGGCTAATC  
CCCTTAATGTTGGGCGCCCCGGATATAGCATTCCCCCGAATAAATAATAT  
AAGCTTCTGACTTCTACCCCCCTCCTTTCTTTTACTCCTAACTTCTTCAG  
CAGTTGAAGCAGGGGCGGAACCGGATGAACTGTCTACCCCCCTCCTCC  
TCCAACCTTAGCCACGGGGGGGCTCTGTTGACATGGCAATTTTTTCACT  
CCACCTAGCTGGTGTATCATCCATTTTAGGCGCAATTAACCTTTATCACAA  
CCATTTTTAACATAAAACCTGCTGGCATGACTATTTATCAGATGCCGTTA  
TTTGTGTTGATCAGTCCCTTATTACTGCCGTCTATTACTGCTGTGCTTACC  
CGTTCTGGCTGCGGCCATTACTATACTTTTAACGGATCGAAACTTAAACA  
CGGCTTTCCTTTGACCCCGCTGGGGGAGGGGACCCATCTTATAACCAGCAT  
TTA-----

-----NNNNNNNGAGAAACCTTCACCCGTCAAATTGCTTTGGCATGCTGT

TGCTGTCCGATGCCACCAGTGTACCAAGCTGTGCGAACTGTCTGGGGA  
ATGTGCCTCAGCAACTTCCCTGCCATTTGCAAGACCGAGGACTTCCCTCCA  
GTTACCTAAAGATATGGTGTATCCAGCTCTTGTACATGAGGAGCTGGAGA  
CAGAAGATGAGAAACTGGTCTACGAAGCTGCCTTGAACCTGGATCAACTAC  
GACCTGGAAGGAGGCACTGCCACATGCCAGAGCTTCTGAGGACCGTTTCG  
CCTTGCCTTGCTGCCTGCCATCTTCTGATGGAGAACGTTTCCACAGAAG  
AGCTGATTAACACCCAGACCAAGAGCAAGGAGCTGGTAGACGAAGCTATC  
CGCTGTAAGCTGAAAATCCTGCAGAATGACGGTGTGTTCAACAGTCCATG  
CGCTCGGCCGAGAAAAACCAGCCATGCCCTGTTTCTTAGGAGGGCAGA  
CATTCATGTGTGACAAGTTATATCTGGTTGACCAGAAGGCCAAAGAGATT  
ATCCCAAAGGCAGACATTCACAGTCCAGGAAGGAGTTCAGTGCCTGCGC  
CATCGGCTGTAAGGTGTACATCACTGGTGGAA--GAGGTTT-AGAGAATG  
GCGTGTCTAAAGATGTGTGGGTCTATGACACAGTCCATGAGGAATGGTCC  
AAGGCTGCTCCGATGCTCATTGCTAGGTTTCGGCCATGGCTCTGCGGAGTT  
AAAACACTGTCTCTACGNNNNNNNNNNNNNNNNNNNNNNNNNNNNNNNNNNGGA  
TGATTACGCTGTTGTGTTTCAGTTCGTTCCAC  
GACAAGGCTCATACTCAACGAAGCAGAGCTCATACTAGCACTGGCCCAGG  
AGTTCAGATGAGAGTAGTAACAGTGTCCCTGGAGGAACAGTCTTTCCCC  
AGTATAGTCCAGGTGATCAGTGGTGTCCATTTTAGTCAGCATGCATGG  
AGCTCAACTCATCACGTCCTTCTCCCAAGGGGAGCAACTGTGGTGG  
AACTCTTCCCCTTTGCTGTCAACCCAGAGCAATATGCACCGTATAAAACC  
CTTGCCCTCCCTCCAGGCATGGACCTTAACCTATAATTCATGGAGGAACGC  
AAAGGAGGAAAACACCGTCAACCCAGACAGACCGTGGGAACAAGGAG  
GCATTTCTCATTGAGGAGGAGGAGCAAGAGCGAATTATGGCTAGTAAG











CATGATGGGCAAACCGTTCCCCAGTGGGGCCCCTTTCCCGATGGGCATGT  
ACAACCCCCACCAT-----CTCCAGGCCATGTCTAATTCTGGGGTGGGT  
CACCCA-----CACCCGTCCCTGATGCCAGTTCCTTGTCTGCAGCTAT  
GGGCATGGGCTGTCACATGGAA-----

-----  
-----  
-----  
-----  
-----  
-----  
-----  
-----  
-----  
-----  
-----  
-----  
-----  
-----  
-----

-----GGCTTTCACCAGTT  
TGAGTGGCAGCCAGCTCTCAAGAATGTGTCCACACTTTGCAATGTTGGCA  
TTATTAACGGGCTCTCTGGATGGGCTTCCTCGGTGGATGACTCCCCGGCT  
GACACCATCACTCGCAGGTTTTCGCTATGATGTGGCACTGGTGTGAGCATT  
AAAGGACCTGGAGGAGGACATCATGGAGGGGCTGAGAGAGAGTGGGATGG  
AAGACAGCGCATGCACCTCAGGCTTCAGTGTGATGATCAAGGAAGCTTGT  
GATGGCATGGGCGATGTCAGCGAGAAGCACGGTGGAGGACCGGTTGTTCC  
CGAGAAGGCTGTACGTTTCTCTTTCACCTATTATGTCTGTCTCTGTCCTCG  
CARACRATAAGGAG-----GAAGAG  
CTTACCATCTTACCCGAGCCGAAGCCAAACTCGGAGCTGTCCTGTAAGCC  
CCTTTGCCTGACGTTTGTGGACGAGTCAGACCATGAGGCGCTCACAGCCG  
TCCTGGGGCCTTTAGTTGCGGAGCGTAATGCAATGAAGGAGAGCAGGCTC  
ATCCTGTCCATGGGCGGACTGTCCCGCTCCTTCCGCTTCCACTTCAGAGG  
CACGGGATACAATGAGAAGATGGTACGTGAGATGGAGGGCCTCGAGGCCT  
CAGGTCCGCTATGTCTGCACTCTCTGTGACTCCAGTCGGGCAGAAGCC  
GCTCAGAACATGGTGCTGCACTCCGTCACCCGCAATCATGAGGAGAACCT  
AGAACGTTACGAAATATGGAGAACCAACCCCTTTTCTGAGTCTGTGGATG  
AGCTGCGAGACAGAGTCAAAGGGGTCTCTGCCAAGCCCTTCATGGAGACA  
CATCCACGATGGATGCACTACACTGTGACATTGGCAATGCCACCGAGTT  
CTACAAAATTTTCCAGGACGAGATCGGGGAGGTGTACAAAAGGT---CA  
AC---CCCAGCCGGGAGGAACGGCGCAGCTGGAGGGCAGCCCTAGATAAA  
CAGCTGAGGAAGAAGATAAAGCTTAAACCGGTAATGAGGATGAATGGGAA  
CTATGCCCCGAGGCTAATGACCCAGGAGGCTGTGGAGGTGGTGTGTGAGC  
TGGTGCCCTCGGAGGAGAGGAGGGAGGCCCTGAGGGAGCTCATGAGGCTC  
TACCTCCAGATGAAGCCTGTGTGGCGCGCCACCTGCCAGCCAAGGACTG  
CCCCGACCAGCTGTGCCGCTACAGCTTCAACTCCCAGCGCTTCGCCGACC  
TCCTCTCCTCTACCTTCAAATATAGGTACAACGGAAAGATAACCAATTAC  
CTGCACAAGACCCTGGCCACGTGCCGAAATCATAGAGAGAGACGGGTTC  
CATAGGAGCCTGGGCCAGCGAGGGGAACGAGTCCGGCAAACAAA-----

-----  
-----  
-----  
-----  
-----  
-----  
-----  
-----



ACCACGGAGCCGGGGCCTTCTTTTCGATACATGAGGCAGCCGATCAAACAA  
GAGCTCATCTGCAAGTGGATCGAGCCGGAGCAGCTGACGAATCCCAAAA  
GTCGTGCAACAAAACTTTTAGCACGATGCACGAGCTCGTGACCCATCTGA  
CGGTGGAGCATGTGGGGGACCGGAGCAGACCAACCACATCTGCTTCTGG  
GAGGACTGCGCC-----A-----

>Synaphobranchus oregoni

AGCCTGCTAATCCGAGCCGAGCTAAGCCAGCCCCGGAGCCCTACTTGGGGA  
CGACCAGATCTATAATGTTATTGTTACAGCACATGCCTTCGTAATAATCT  
TCTTTATAGTAATACCCGTGATAATCGGGGGATTTGGCAATTGATTAGTA  
CCCCAATAATTGGGGCCCCAGATATAGCATTCCCACGAATAAATAACAT  
AAGCTTCTGACTCCTCCCCCATCATTTCTTCTACTATTAGCCTCATCTG  
GGGTAGAAGCTGGTGCAGGAACGGGATGAACAGTCTACCCACCTCTTGCT  
GGCAACCTGGCCCACGCCGGGGCCTCCGTAGACTTGACCATTTTCTCCCT  
CCATCTCGCAGGGATCTCGTCTATCCTTGGGGCCATTAACCTTTATTACTA  
CAATTATTAATAATAAAAACCCCTGCCATCTCACAATACCAAACCCCGCTA  
TTTGTTGAGCCGTCCTAGTAACGGCAGTCCTTCTACTACTATCCCTACC  
AGTTCCTTGCCGAGGAATCACTATACTCCTTACTGACCGAAACCTAAATA  
CAACCTTCTTTGACCCGGCAGGGGGAGGGGACCTATTCTATAACCAACAC  
TTATTTTGATTCTTTGGCCACCCAGAAGTGTATATTTAATCTTACCCGG  
CTTTGGAATAATTTACACATTGTTGCATATTATGCTGGCAAAAAGAAC  
CCTTCGGCTACATAGGAATGGTGTGAGCCATGATGGCTATCGCCCTCCTC  
GGCTTCATTGTATGGGCCATCACATGTTACAGTTGGGATAGACGTGGA  
CACACGCGCCTA-----

-----GGACGAGTATATTGTGGTCTTCAGC  
CGCTCCGTAAACAGGCTGATCCTGAACGAGGCAGAGCTGATCCTGGCACT  
AGCCCAGGAGTTCCAGTTGAAGGTCGTTACCGTGTCCCTGGAGGAACAGT  
CCTTTGCAGACATCATCCGAGTCATCAGCAGGGCATCTATGCTGGTCAGT  
ATGCACGGGGCCCAGCTGGTCACCTCTCTTCTTCCCTTCCCCGTGGCGCCGC  
TGTGGTGGAGCTCTTCCATATGCCGTCAACCCAGAGCATTATGCTCCCT  
ACAAGACACTGACCTCGCTGCCGGGCATGGACCTGCAGTATGTGGCCTGG  
AGGAACACCAAGGAGGAGAACTCTGTGACCTTCCCCGAGCGCGCCTGGGA  
CCAGGGTGGCATTGCACACTTGGAAAAGGAGGAGCAGGAACGTATCCTGA  
AGAGCAGCGAGGTGCCGCGACACCTGTGCTGTGCGGAACCCGGAGTGGCTC  
TTCCGCATCTACCAGGACACCAAGGTGGACATTGCATCCCTACTTGAAGC  
ACTGCG---CCAGGGACTGACC---TCCAGGCCAGGGCCCAAAAAG---GG  
CTAGGCCCAGCAGCATAGTTCACCCAGGCAGGGTGGAGGGAGCCCAAGTGC



-----  
-----  
-----  
-----  
-----  
-----  
-----  
-----  
-----  
-----  
-----  
-----  
-----  
-----  
-----  
-----  
-----  
-----  
-----  
-----  
-----  
-----

-----TCCTACA  
CCATCGAGATGGGCACCTGGGGGCCCCAGTGGAAGGAGAGCCCCAGCCG  
TTCTCCTGCTCCATAGAGGACCCCACCAAGCAGACCAAGTTCAAGGGCAT  
AAAGACCTACATCTCGTACCGCGTGACGCCAGCCACACGGGCCGCCCCG  
TGTACCGCCGCTACAAGCACTTCGACTGGCTCTACAACCGCCTGCTGCAC  
AAGTTCACCGTTCATCTCTATCCCCACCTGCCCGAGAAGCAGGCCACGGG  
CCGCTTCGAGGAGGACTTCATCGAGAAGCGCAAGAGGCGGCTCATCCTGT  
GGATGGACCACATGACCAGCCACCCTGTGCTTTTCGCAGTACGAGGGCTTC  
GAGCACTTCCTGATGTGCGCCGACGACAAGCAGTGGAAGCTGGGAAAGCG  
GCGGGCGGAGAAGGACGAGATGGTGGGCGCGCACTTCATGCTCACTTTCC  
AGATCCCCAACGAGCACCCAGGACCTGCAGGACGTGAAGGAGCGGGTGGAC  
TCCTTCAAGGCCTTCGCCAGGAAGATGGACGACAGCGTGCTGCAGCTCAC  
GCACGTGGCCTCCGAGCTGGTGCGCAAGCATCTGGGAGGCTTCCGGAAGG  
AATTCCAGAGGCTGGGGAATGCCTTCCAGTCCATCAGCCAGGCGTTCACA  
CTGGATCCTCCCCACTGCTCCGACGCCCTCAACACCGCCATATCCCAC--

-----  
-----  
-----  
-----  
-----  
-----  
-----  
-----  
-----  
-----  
-----  
-----  
-----  
-----  
-----  
-----  
-----  
-----  
-----  
-----  
-----

-----GCCAAATCCCGCTTC  
CACCTGGCGCCGGGACCGGTCCTGGCACGGACC--GCAGCGTCCCACT

TAGCAACAGCTTGCTATCCCCGCAACAAGCCGAAGAGACCGCAGCAG---  
CCTCCCCGCAGCGATGGTTTTGTCACCC---CTGCCAACAATCGACTGGAC  
TTTGCCGCCTCGGCATACGATGCCGCTGCCGCGGCTGATTTTGCCGGTAA  
CGCGGCCACCCTGCTGTCTTACGCAGCTGCTGGAGTCAAGGCGC-----  
TTCCACTGCCCACTGCGGGGTGTTTACGGTAGACCTCTGGGTTATTACGCC  
GACCCCTCGG---GCTGG---GGCACGCGCACTCCACCCCAGTATTGT--  
-----AGTAAATCCAGTTCAGTTCCTCTCTTGTGGCCAACAAATTTCCA  
CTGGGAGCAGGACTGGAA---CCTCAAATTACCTGG-----TGGAT  
GA---GGGG---GACAC---GATGGTAACGAAAGGTCTCCA---CT---  
AAGTGCCTCCGAGGAC---GCCAAACCTAAAGACCT-----GTCGGA--  
-ATCCAGCTGGATAGAG---ACACCTTCCTCCATTAAATCGATCGATTCA  
AGTGATTCTGGAATTTTTG---AGCAGGCGAAAAGGAGGCGAATATCACC  
TTCTGCCACGCCG-----GTTTCTGAAACGGCGTCTCCGTTGAAAA  
GCGAA-----

-----TCAACCACAGCAC  
CCACGACCTGGGCTCTCG---ACAAAAGGCGTTTTCTCGCAAGCG---C  
CAGGCTAT-----GCCGCTGCCCTGGGA---CACCATCA-----CCAC  
CCCACCCATGTAGCTCC---TATTCCACCGCGGCTTTCAATTCCACTCG  
GGACTTTCTGTTTTCGAAACCGGGGTTTTCGGAGACGCGACAAG-----  
----CGCACAGCACAGTCTCTTCGCCCTCCGC---AGCGGGAAGTTT---T  
-----GCAGGGCCACATGGACACTCGGATGCAACTGGGCACCTGCTTTT  
TCCGGGACTTACAGAG---CAAGCGGCCACTCACGCGTCTTCCAATGTTG  
TAAACAGTCAGATGCGTCTGGGCTTTTCTGGGGACATGTACGGTAGAGCC  
GAGCAGTACGGCCATGTAACCAGCCCCAGGT---CCGATCATTACGCTTC  
GACCCAATTGCACGGATATGGCCCCATGAACATGAACATGGCTGCA---C  
ATCACGGGGCAGGGGCCCTTCTTTTCGGTACATGAGGCAGCCGATAAAGCAG  
GAACTCATCTGCAAAATGGATCGAACCAGAACAATTGACGAACCCGAAAAA  
GTCTTGAACAAAACCTTTCAGTACGATGCACGAGCTCGTTACACATCTCA  
CAGTGGAGCATGTGCGGGGACCAGAACAATCGAATCATATCTGCTTTTGG  
GAAGAGTGTCCAAGAGAAGGAAAACCTTTAAGGCGAAGTACAAACTTGT  
AAATCACATCAGAGTGCACACCGGTGAAAAACCATTTCCATGCCCGTTTC  
CTGGCTGTGGGAAA

>Synnathus fuscus

AGTCTCCTCATTTCGAGCGGAACCTTAGTCAACCGGGGGCCCTCCTAGGCGA  
CGACCAGATTTACAATGTAATCGTTACGGCCCATGCTTTCGTTATAATTT  
TCTTCATAGTTATAACCCATCATAATTGGGGGTTTTGGTAACTGGTTAGTG  
CCTTTAATAATTGGAGCCCCAGATATAGCATTCCCTCGAATAAATAATAT  
GAGCTTCTGACTACTACCCCCCTCTTTCTGCTTCTACTTGCCCTTTCAG  
GAGTGAAGCAGGCGGGGTACAGGGTGAAGTGTCTACCCCCGCTCTCA  
GGTAAATTTAGCCCATCAAGGAGCTTCTGTAGACCTTACAATTTTCTCTTT  
GCACCTAGCGGGGGTATCCTCGATCCTCGGAGCTATCAACTTCATCACCA  
CTATTATTAATATAAAACCCCTTCAATCTCTCAATACCAGACACCCTTA  
TTTGTTTGGGCTGTCTCATCACTGCCGTTCTGCTTCTTCTCTCCCTGCC  
TGTCTTAGCAGCTGGTATTACTATGTTATTAAGTACCGTAATTTAAACA  
CAACTTCTTTGACCCCGCAGGAGGGGGGACCTATTCTCTACCAACAT

-----  
-----  
-----  
-----  
-----  
-----  
-----  
-----  
-----  
-----









-----  
-----  
-----  
-----  
>Synodus kaianus

AGCCTTTTAATCCGCGCTGAACTTAGCCAGCCCCGAGCCCTTTTAGGGGA  
TGACCAGATCTACAATGTAATTGTTACAGCCCACGCGTTCGTAATGATTT  
TCTTTATAGTGATAACCAATCATAATTGGCGGTTTTGGAAATTGGCTTATC  
CCTCTAATGATCGGCGCCCCGATATAGCATTTCGCCGATGAACAACAT  
GAGCTTCTGGCTTCTGCCCCATCATTCCTTCTTCTCCTAGCATCTTCTG  
GGGTCGAGGCCGGAGCCGGCACC GGATGAACGGTTTACCCCCATTAGCA  
GGCAACCTGGCTCACGCTGGGGCTCAGTAGACTTAACAATTTTTTCTCT  
CCACTTGGCGGGAATTTCTTCTATTTTAGGCGCAATCAACTTTATTACAA  
CTATTATTAACATAAAAACCCCCATCAATCTCCCAGTATCAGACCCCCCTT  
TTCGTTTGGGCCGTGCTAATTACAGCGGTGCTACTTCTGCTTTCTCTTCC  
GGTCTGGCGGCTGGTATTACAATACTACTCACGGATCGAAATTTAAACA  
CCACTTTCCTTCGACCCTGCAGGGGGCGGAGACCCTATCTTATAACCAACAC  
CTGTTTTGGTTCTTCGGACACCCCCGAGGTCTATATTCTAATCCTTCCAGG  
CTTTGGGATAATCTCCCACATTGTGGCCTATTACGCCGGCAAAAAAGAAC  
CATTCCGATAACATGGGCATGGTTTGGGCAATGATGGCAATCGGCTTACTA  
GGGTTTATCGTTTTGAGCTCATCACATATTCACTGTGGGGATGGACGTAGA  
CACGCGCGCATATTCCTTGAGAGGAAC TTGCATCTCTCCAAC TGCCTTGG  
CATGCTGTTATTGTCAGATGCCACCAGTGCACCAAAC TGT CAGAGCTGT  
CGTGGGGTATGTGCC T CAGCAATTTCCCGCCATCTGTAAGACAGAGGAC  
TTTCTTCAGCTCCCCAAGATATGGTAGTGCAGCTTCTGTCCCACGAGGA  
GCTGGAGACTGAAGATGAGAGACTTGT TTTATGAAGCTGCCCTCAACTGGG  
TCAATTATGACCAAGAGAGGAGACACTGCCATCTACCAGAGCTCCTTAGA  
ACCGTGGCGCTGGCTCTGCTTCCCTGCTATCTTTCTCATGGAGAATGTCTC  
CACTGAGGAGCTGATCAATGACCAGGCTAAAAGCAAGGAGTTGGTTGATG  
AAGCCATCCGTTGCAAGTTGAAGATTCTGCAGAATGATGGCGTGGTCAAC  
AGTCCATGTGCCCGGCCAGAAAGACCAGTCATGCCCTTTTCTCTTAGG  
AGGACAGACCTTCATGTGTGACAAACTGTACCTGGTGGATCAAAGGCCA  
AAGAGATTATTCCCAAGGCTGACATCCCCAGCCCCAGGAAGGAGTTCAGC  
GCCTGTGCAATTGGCTGTAAGGTCTACGTTACGGGTGGGC--GGGCTC-  
AGAAAATGGGGTGTCCAAAGATGTGTGGGTCTATGATACTGTGCATGAGG  
AGTGGTCCAAGGCAGCACCCATGCTGATCGCAAGGTTTCGGCCATGGCTCT  
GCTGAACTCAAACACTGTCTCTATGTGGTGGGAGGTCACACAGCGGCCAC  
TGGCTGNNNNNNNNNNNNNNNNNNNGGATGAATACATCGTGGTGTTCAGTCCGCTCTTCAACAAGACTGA  
TCGTGAATGAAGCGGAACTGATTCTGGCATTGGCCCAAGAGTTCCAGATG  
AGGGTGGTCACAGTTTCCTTGGAGGAACAATCGATTCCCAGTATTGCCAA  
GGTAATCAGCCGAGCCTCCATGTTGGTTAGTATGCATGGAGCTCAGCTTG  
TCACCTCGCTGTTCC TCCCTAGAGGTGCTGCGGTGGTCGAGCTTTTCCCC  
TTTGCCGTCAATCCAGAACAGTACACCCCGTACAAAACACTAGCCTCTTT  
ACCAGGTATGGATCTCCACTATGTTTCTTGGAAACAACACTTTTGAGGAAA  
ACACTGTCACACACCCGGATAGACCTTGGGAACAAGGAGGCATTGCCAC  
TTGGAAAAAGAAGAACAGGAACGAATCCTAGCCAGCAAAGATGTTCCCCG  
ACACCTCTGCTGCCGCAATCCAGAATGGCTGTTCCGGATCTATCAGGACA  
CGCTGGTGGACATCCCTTCATTCTGGAGGCGCTGAA---GGAAGGCTTG  
AAG---ACCAGGCCAAGCTTGAAAAA---GTCCAAGCCAGCCAGCACTGT  
TCAYCCCGGCAGGGTGAGGGAGCCCCAGTGT CAGACATCAGTCCAAGCTA  
CAAATGAG--CTAGCTCACGGTATCGTGGCAGATCCC GTGGGAGCTGAAG  
TATCTGAT-GTGCAGAGGTTAAGTACGAGGTGTGGATGCGGAAAAAGGA  
TTCAAGTAAGGGAACCTGGAGGATCAAATCATTCAGGCTAACCTGCAC

TGGAAGCCTTTGGTAATGCTAAAACAGTGAGGAATGACAATTCCTCCCGC  
TTTGGAAAATTCATCCGCATTCACCTTTGGAAGTAGTGGCAAACCTGTCATC  
AGCAGATATTGAGACTTACTTGCTGGAGAAATCACGGGTACCTTTCAGC  
TCAAGTCAGAGAGGAACACCACATCTTCTTTTCAGATCTTGTCCAATCAA  
AAGCCTGAGCTGCTTGACATGCTGTTGATCACCAACAACCCATACGACTA  
CAGTTACATTTCCCAAGGAGAGGTCACTGTAGCCTCCATCAATGACTCAG  
AGGAGCTGATGGCCACTGACAATGCTTTTGTATGTCCTTGGATTCACTCAA  
GAAGAGAAGATGGGAATCTACAAGCTGGTAGGAGCCATCATGCACTACGG  
CAACATGAGGTTCAAACAGAAACAGCGCGAGGAGCAGGCTGAGCCTGACG  
GCACAGAAGCTGCTGATAAATCAGCCTACTTGATGGGGCTGAATTCAGCT  
GATCTCATCAAAGGACTGTGCCATCCCAGAGTTAAAGTAGGGAATGAGTA  
CGTCACCAAAGGCCAGGTTGTAGATCAAGTCTACTACCCCAACAAAGAGG  
CCTTCAAGTGTGAGGAGTGTGGGAAGCACTACAACACCAAGCTGGGATAC  
AAGCGTCACGTTGCCATGCACTCTGCCACTGCAGGAGATCTCACCTGTAA  
AGTGTGCATGCAGACATACGAGAGCACCCCGGTGCTTTTGGAGCACCTCA  
AGAGCCACTCTGGGAAGTCTTCAGGTGGCACCAAGGAGAAAAAACATCCG  
TGTGACCACTGTGACCGTCGTTTCTATACGCGAAAAGGATGTGAGACGGCA  
CATGGTGGTCCACACGGGCCGAAAAGGACTTTCTGTGCCAGTACTGTGCC  
AGCGCTTCGGCAGGAAGGACCATCTGACACGCCATGTGAAGAAGAGCCAC  
TCGCAGGAGCTCCTGAAGATCAAGACGGAGCCTCCTGATATGTTAGGTCT  
TTTAGCTTCAGGGTCACCACCGTCTGTGAAGGAGGAGCTCAGCCAA  
TGATGTGCAGCATGGGTGCCAACAAAGATCCCATGATGGGCAAACAGTTC  
TCAAGTGGGCCGCTTTTCCCATGGGCATGTACAACCCCCACCAT-----  
-CTTCAGGCCATGTCTAATTCTGGGGTCGGTCACCCG-----CACCCAT  
CCCTGATGCCAGTTCCTTATCTGCAGCTATGGGAATGGGCTGTCATATG  
GAATATCTTATCTATGCTTCATTTTCTTTCATGGGATGTTTACAAATCAG  
YGATGGGTCAAACATTTGTGAATTTACTGGCAAGTAACCTCTCCAAGTGTGT  
CCTACGCACTGACACAGCAGAAGTACTTCAGCAACTACAGCCCTGTCATT  
GGGTTTTACATCTACGAGCCATTGAGTACTGGAACCAACAGTGCAGGA  
ACACCTGAAGACGCTGAGCCATGGCTTCAACAAGATCTCCTGGATGGACA  
ATTTCTTCCACCACCTGCGGGTTGTGAACGTTAGCGCGTCAACGAAGGCG  
GACTTCATCAGTACCCTCAAAGGCTCCTTTCTTCGGACACCTGAGTACCA  
GCACCTCACAGAGGATATCATCTCTCCAGRA---ACCGTGAGAGCG---  
---ATCAGTATGACATCATTGCGTCACGCTTGATCTGGTGGCACGCACC  
ACCGAGAAGAGGCGTGAAGAAGTGGTGGAGCTCCTGGAGAAGCTGCGTCC  
CCTGATGCTCATCAACAGCATCAAGTTCATCGCCTCAACCCACCTTCG  
TATTCATGGACCGGTACAGCTCTTCGGTCACTCTCCATTCTCACCTCA  
GGCTTCAGTGTGCTCACCATCCTCATTTCTCACCTTCTTCTGGTCACTAA  
CCCGCTGGGGAACTTCTGGCTCATCTGACGGTGACGTCTGTTGAGCTGG  
GTGTGCTGGGACTGATGGGCTACCATGCTTTTGTAGTGGCAGCCAGCCCTC  
AAGAACGTGTCCCTTCCCTGCCATGTGGGCATCATCAATGGGCTGTCAGG  
CTGGGCTGCCTCAGTGGATGATTCCCCAGCAGATACCATTGCCCCGCGGT  
TTCGCTATGATGTAGCCCTGGTGTCTGCTCTGAAGGACCTGGAGGACGCC  
TTCATGGATGGACTGAGAGAGCATGGGCTGGAAGACAGCGATT-----C  
AAGATTCAATGTGATGATCAAGGAATCCTGTGATGGTATGGGGGATGTCA  
GTGAGAAGCATGGTGGTGGGCCGGCAGTCCCGGAGAAGGCTGTGCGCTTC  
TCCTTTACCGTCATGTCCATTTCCGTCCAAGCAGATGGAGAGGAG-----  
-----GAGGCAGTGGTCCTTTTCCGTGAAC  
CAAAGCCCAACTCGGAACTGTCTGTAAGCCGTTATTCCTGATGTTTGTG  
GATGAGTCTGACCATGAGACACTCACAGCCATCCTGGGGCCTCTGATAGC  
TGAGAGAAATACCATGAAGGAGAGCCGACTCATTCTCTCGATGGGTGGAC  
TCCCCCGGTCTTTTTCGTTCCATTTTCAGAGGAACTGGCTATGATGAGAAG  
ATGGTGCAGAGATGGAAGGCCTGGAGGCCTCAGGCTCCACCTACGTCTG



-----  
-----  
-----  
-----  
-----  
-----  
-----  
-----  
-----

NNNNNNNNNNNNNNNNNNNNNNNNNNNNNNNNGGGGA  
TAAATCCGTTTCGCGGACGGGATGGGCGCCTTCAAGATAAACACAGCTCG  
CACGACATTGGCTCCGG---GCAAACGGCGTTTTTCGTCTCAGGCA---CC  
CGGCTAT---GCAGCGGCCGCCCTGGGG---CACCACCA-----CCACC  
CAACCCACGTTAGTTCG---TACTCCACGGCAGCTTTTAATTCCACCAGG  
GACTTTCTGTTTCAGAAACCGGGGCTTCGGAGACGCCACGAG-----  
---CGCGCAGCACAGCTTGTTTCGCCTCCGC---CGCGGGAAGTTT---C-  
-----GCAGGCCACATGGACACTCCGATGCCGCGGGACACCTGCTCTTT  
CCGGGGCTTCACGAG---CAAGCCGCGAGCCACGCGTCTTCTAACGTCGT  
TAACAGCCAGATGCGGCTGGGCTTTTCAGGGGACATGTACGGGCGGGCCG  
AGCAGTACGGACACGTTACCAGTCCGCGGT---CCGACCACTACGCTTCG  
ACCCAGTTACACGGCTACGGCCCCATGAACATGAATATGGCCGCG---CA  
CCACGGCGCGGGGGCTTCTTTTCGATACATGAGGCAGCCGATAAAAACAAG  
AGTTGATCTGCAAGTGATCGAACCGGAGCAGTTGACGAATCCCCAAAAA  
TCGTGCAACAAAACCTTTCAGCACAATGCACGAGCTTGTGACCCATCTGAC  
GGTGGAGCATGTGGGGGGACAGAGCAATCAAACCACATTTGCTTTTGGG  
AAGACTGTTCTCGTGAAGGAAAACCGTTCAAAGCCAAATACAAACTTGTG  
AATCATATCAGAGTTCACACCGGAGAAAAACCATTCCCATGCCCATTTCC  
TGGCT-----

>Talismania bifurcata

NNNNNNNNNNNNNNNNNNNNNNNNNNNNNNNNNNNNNNNNNNNNNNNNNNNNNNNN  
NNNNNNNNNNNNNNNNNNNNNNNNNNNNNTTCTTTATAGTAATAACCAATTATGATTGGGGGCTTCGGAAA  
CTGGCTGC  
TCCCCCTAATGCTGGGGGCCCCCTGACATAGCATTCCCCGAATAAACAAC  
ATGAGCTTCTGGCTCCTCCCACCCTCCCTGCTCCTTCTCCTCTCCTCCTC  
CGGGGTTGAAGCCGGCGTCCGGACAGGATGAACGTCTACCCCCCTTTAG  
CCGGCAATCTAGCCCACGCCGGCGCATCTGTAGACCTCGCCATCTTCTCC  
CTCCACCTGGCAGGTGTCTCCTCAATCCTGGGGTCAATCAACTTTATTAC  
CACAATCACCACATGAAACCCCCGCCATCTCGCAGTACCAAACACCCC  
TTTTCGTGTGGTCTCTTCTCGTTACCACAGTCCCTGCTCCTTCTGTCCCTC  
CCTGTGCTAGCCGACGCTATTACCATGCTTCTCACAGACCGCAACCTTAA  
TACGACGTTCTTTGACCCGGCCGGAGGGGGAGACCCCATCCTATAACCAAC  
ACCTATTCTGGTCTTCGGCCACCCAGAAGTTTACATCTTAATCCTTCCC  
GGGTTTGGC ATCGTCTCACACGTGGTTCGCCTACTACGCCGGCAAAAAGA  
GCCATTCGGCTATATGGGCATGGTTTGAGCTATGATAGCTATCGGACTTC  
TGGGGTTTCAATTGCTGGGGCCATCACATGTTACAGTTCGGAATAGACGTA  
GACACCCGTGCCTA--TTCTAGAGAGAAACCTTACCCGACTAACTGCCTT  
GGCATGCTGTTGCTGTCGGATGCCACCAGTGCACCAAGCTGTCAGAGCT  
TTCTTGGGGCATGTGCCCTCAGCAACTTCCCCGCTATTTGCAAGACAGAGG  
ACTTCTCCAGCTTCCCAAGACATGGTGGTGCAGCTTTTGTACATGAG  
GAGCTGGAGACAGAAGATGAGAGACTGGTTTATGATGCTGCCCTGAACTG  
GATCAACTATGACCTGGAAAGGAGGCACTGTCACCTTCCGGAAGTGTGA  
GAACGGTCCGTCTTGCTCTGCTGCCC GCCATCTTTCTAATGGAGAATGTC







-----CATCACTCAACAGGCGAAGTCACAGACAGAGAAGTGGCTTTGG  
GGATAAATCCGTTTCGCTGACGGAATGGGCGCTTTCAAAATCAACCACAGC  
TCCCACGATCTTGGCTCAGG--GCAAACGGCGTTGCCTCGCAGGCT--  
-CCCGGCTAC--GCAGCCGCTGCCCTGGGA--CACCATCA-----CC  
ACCCAACCCATGTCAGCTCC--TACTCCACCGCGGCGTTCAACTCCACC  
CGGGACTTTCTCTTTCGGAATCGGGGATTCGGAGACGCCACTAG-----  
-----CGCACAGCACAGTCTCTTCGCCTCAGC--TGCGGGAAGTTT--  
-C-----GCAGGGCCACATGGACACACCGATGCCACGGGACACCTGCTC  
TTCTCGGGACTGCACGAG--CAAGCGGCGACCCACGCGTCTTCGAACGT  
GGTGAACAGTCAGATGCGCCTAGGCTTTTCGGGGGACATGTACGGAAGAG  
CCGAGCAGTACGGTCACGTAACGAGCCCCCGGT--CCGAGCACTACGCT  
TCGACTCAGTTGCACGGCTATGGCCCCATGAACATGAATATGGCTGCC--  
-CATCACGGTGCAGGGGCCTTCTTCCGTTACATGAGGCAGCCGATCAAGC  
AAGAGCTGATCTGCAAGTGGGTGGAACAGAGCAGCTGTGCAATCCGAAA  
AAGTCTGCAACAAAACCTTTCAGCACGATGCATGAGCTCGTGACCCACCT  
TACAGTGGAAACATGTTGGGGGACCGGAACAGTCGAATCACATTTGCTTTT  
GGGAAGAGTGTCCGCGAGAAGGGAAACCATTTAAAGCCAAGTACAAACTT  
GTAAATCATATTAGAGTGCACACCGGATAGAAGCCGTTTCCATGTCCATT

CCCC-----

>Tetraodon miurus

AGCCTTCTTATCCGAGCTGAACTCAGCCAACCAGGCGCACTACTTGGTGA  
TGATCAGATTTATAATGTGATCGTTACAGCCCATGCATTTGTAATAATTT  
TCTTTATAGTAATAACAGTCATAATCGGCGGGTTTGGAAACTGACTTGTG  
CCCCTTATAATTGGAGCCCCTGACATAGCATTCCCCGAATAAATAACAT  
GAGTTTTTACTTCTGCCCCCTCCTTCATTCTTCTCTTAGCATCTTCTG  
GGGTAGAAGCAGGAGCTGGCACAGGATGAACCGTCTACCCCCACTAGCG  
GGCAATTTAGCCCACGCAGGCGCATCCGTTGATCTCACTATTTTCTCCCT  
TCACTTAGCTGGTGTCTCATCAATTTTAGGCGCTATTAACCTTTATTACAA  
CAATTATCAATATAAAAACCCCCAGCTATCTCCCAATACCAAACGCCCTG  
TTCGTATGGGCCGTCTTAATCACCGCGTACTTCTCCTACTATCCCTACC  
GGTCTCGCAGCAGGAATTACAATACTTCTTACAGACCGAAACCTAAACA  
CCACCTTCTTCGACCAGCCGGTGGAGGAGACCCCATCCTTTACCAACAC  
CTATTCTGATTCTTCGGACA-----

-----  
-----  
-----

-----TTCCCTGGAGAGAAAACCTTCACCCGTCCAACCTGCCTCGG  
CATGCTGCTGCTGTCTGATGCCACCAGTGCACCAAACCTCTCCGAGCTCT  
CCTGGGGCATGTGCCCTCAGCAACTTTCCCGCAATTTGCAAGACGGAGGAG  
TTCCCTCAAACCTGCCAAAGATATCGTGGTGCAACTGTTGTCCCACGAGGA  
GCTGGAAACCGAAGACGAGAGGCTGGTCTATGAAGCGGCCCTCAACTGGA  
TCAACTATGACCTGGAAAAGAGGCACCTGCAACCTGCCAGAGCTGCTGAGA  
ACGGTCCGTCTGGCCCTTCTGCCTGCCATCTTCCTCATGGAGAATGTTTC  
TACAGAAGAACTGATCAACGCCACAGCCAAGAGCAAGGAGCTGGTGGATG  
AAGCTATCCGCTGTAAGCTGAGAATCCTGCAGAACGATGGCGTTGTCAAC  
AGCCCGTGGCGACGGCCTCGAAAGACCAGCCACGCCCTCTTTCTCCTCGG  
TGGGCAGACCTTCATGTGTGATAAGCTGTACCTGGTGGACCAGAAGGCCA  
AAGAGATCATCCCCAAGGCTGACATTTCCAGTCCGAGGAAGGAGTTCAGT  
GCCTGCGCCATCGGCTGTAAGGTGTACATCACAGGTGGGA--GGGGCTC-  
GGAAAACGGGGTCTCAAAGACGTGTGGGTGTACGACACCGTCCACGAGG  
AATGGTCAAAGGCAGCGCCCATGCTGATTGCCAGGTTTGGCCATGGTTCT  
GCAGAGCTGAAACACTGCCTCTATGTGGTGGGAGGTCACACTGCAGCAAC  
CGGTTGCCCTGCCAGCATCTCCGTCTGGATGAATACATCGTGGTGTTCAGT  
CGCTCGGCAGCAGGCTGATCCTGAACGAAGCCGAGCTCATTATGGCACT  
GGCGCAGGAGTTCCAGATGAGGGTGTGACGGTGTCCCTGGAGGAGCAGA  
GCTTCCCAGCATCATCCAGGTGATCAGCGGCGCCTCCATGCTGGTCAGC  
ATGCACGGAGCTCAGCTGATCACCTCGTGTTCCTCCCTCCGGGAGCCGT  
GGTGGTTCGAGCTGTTCCCTTCGCCGTCAATCCGGATCAGTACACCCCAT  
ACCGGACGCTCGCCTCCCTGCCGGCATGGACCTCCACTACATTCCCTGG  
AGGAACACGGAGGAGCAGAACACCCCTCACCCACCCAGACAGACCCCTGGGA  
CCAAGCGGCATCGCTCACCTGGAGGAGGAGGAGCAGGAGCGAATCATGG  
CCAGCAAGGACGTCCCAGGCACCTGTGCTGCCGCAACCCAGAGTGGCTT  
TTCCGCATCTACCAGGACACCTTAGTGGACATTCCGTCTTTCTGGAGGT  
CCTTCA---GGAGGGACTGAAG---GCAAAGCCCGTTTTAAAGAA---GT  
CCAAGCTGTCCGGCACGCTTCACCCGGGCCGGGTGACAGATCCCCATTGT  
CAGACCTCCGTCCAAACCAGCAGTGAGGCCAAACTGACCGTCTCCTGGCA  
GATCCCCTGGAATCTGAAGTACCTGAAGGTGACAGAGGTGAAGTACGAGG  
TGTGGATNNNNAGGAGAGATGCCAGCAAGGGGACCCCTGGAGGACCAGATCATCC  
AGGCCAACCCGGCCCTGGAGGCCTTCGGCAACGCAAAAACGGTGAGAAAC  
GACAACTCCTCCCGCTTTGGAAAATTCATTGCAATCCATTTTGGTCCGAG  
CGGCAAGCTGTCTGCTGCGGACATCGAGACGTATCTGCTGGAGAAGTCCC

GGGTCACCTTCCAGCTGAAAGCTGAGAGGAACTATCACATCTTCTACCAG  
ATCCTGTCCAATCAAAAGCCAGAACTTCTGGACTTGTGCTCATCACCAA  
CAACCCGTACGACTACTCTTACATCTCCCAAGGAGAAGTGACGGTGGCCT  
CCATCAACGACTCGGAGGAGCTGAGGGCCACCGACAGCGCCTTCGACGTG  
CTGGGCTTACGCCGGATGAGAAGATGGGCGTGTACAAGCTGACGGGCGC  
CATCATGCACTACGGTAACATGAAGTTCAAGCAGAAGCAGCGGAGGAGC  
AGGCCGAGCCGGACGGGACGGAGGCTGCGGATAAAATCAGCTTATCTGATG  
GGCCTGAACTCCTCCGACCTGATCAAGGGGCTGTGCCACCCCGAGTCAA  
AGTGGGGAACGAATACGTGACCAAAGGCCAGAGCGTGGACCAGGCTACT  
ACCCCAACAAAGAGGCCCTTCAAGTGTGACGAGTGTGGGAAGCACTACAAC  
ACCAAATGGGCTACAAGCGCCACGTGGCCATGCACTCGGCCACCGCCGG  
AGACCTCACCTGTAAGGTGTGTCTGCAGACCTACGAGAGCACGCCGGTGC  
TCCTGGAGCACCTGAAGAGCCACTCGGGGAAGTCCCTCAGGCGGCACCAAG  
GAGAAGAAGCACCCGTGCGACCACTGCGAGCGGCGTTTCTACACGCGCAA  
AGACGTGAGGCGGCACATGGTGGTCCACACGGGCGGAAGGACTTCCTGT  
GCCAGTACTGCGCCAGCGCTTCGGCAGGAAGGACCACCTGACGCGGCAC  
GTGAAGAAAAGCCACTCGCAGGAGCTGCTGAAGATCAAGACGGAGCCTCC  
AGACATGCTGGGACTGCTGACCTCCGGCTCGCCCGGTGTTCCGTGAAGG  
AGGAGCTCAGCCCCATGATGTGTGGCGTGGGGCCCAACAAAGACCCCATG  
ATGGCTAAACCTTTCCCTGGCGGTGGCCCTTCCCAATGGGCGTGTACAG  
CCCCACCAT-----CTGCAGGCCATGTCTAATTCTGGGGTGGGTACC  
CG-----CACCCGTCCCTCATGCCACCTCCTTGTCTGCAGCTATGGGC  
GTGGGCTGTTCCATGGAGTATCTCATTTATGCATCGTTCTCATTTATGGG  
ATGTTTACAAATCAGCGATGGGTCAAATATTGTAAACCTACTGGCCAGTA  
ACTCTCCAAGCGTTTCATTTGCCTTGACCCAACAGAAATACTTCAGCAAC  
TACAGTCCTGTGATCGGCTTTTATATTTACGAGCCATTGAGTACTGGAA  
CTCCACAGTGCAAGAGCACCTGAAGACTCTGAGTCATGGCTTCAATAAGA  
TCTCCTGGATGGACAACTTTTTCCACTACTTAAAAGTAGTGAATGTAAGC  
GCGTCCACCAAGAACGACTTCATCAGCATCCTGAAGGACTCCTTCCTGAG  
GAGCCCGGAGTACCAGCACTTACCGAGGACATCATATTCTCAAAGA---  
ACCGTGAGACCG-----ATGAGTACGACATCATCGCCTCGCGGATGTAC  
CTGGTCGCGCGGACCACGGAGAAGAAGCGTGAGGAGGTGGTTCGAGCTTCT  
GGAGAAGCTCCGCCCGCTGATGTTGATCAACAGCATTAAGTTCATTGCCT  
TTAATCCCACCTTTGTGTTTCATGGACCGCTACAGCTCCTCGGTGATCTCA  
CCCATCCTGACCTCAGGATTCAGCGTACTCACAATCCTCATCCTTACTTT  
TTTCTGGTAATCAATCCCTTGGGTAACTTCTGGCTCATTCTCACCGTGA  
CATCCGTGGAGCTGGGCGTGTGGGGTTGATGGGCTTTCACCAGTTTGA  
TGGCAGCCACCCCTTAAGAATGTGTCCAGGTCTGCAGTGTGGGATCAT  
CAATGGACTGTCTGGATGGACTTCTCGGTTGATGATTCTCCAGCTGACA  
CCATCACTCGGCGATTCCGCTATGACGTAGCAATCGTGTGAGCATTA  
GACCTGGAGGAAGACATCATGGAGGGGCTGAGAGACAATGGGATAGAAGA  
CAGCACTTGCACGTTGGGTTTTCAGCATCCTGATCAAAGAGTCTTGGGATG  
GTATGGGTGATGTCAGTGAGAAACATGGCGGAGGTCCACTTGTTCCTGAG  
AAGGCTGTACGTTTCTCTTTTACTATCATGTCTGTCTCTGTCAAGGCAGA  
AGGTGAGAAG-----GATAAAGTT-  
--ATCTTACC GAACCGAAACCAAACCTCAGAGCTGTCCTGCAAGCCCCTT  
TCCCTGATGTTTGTGGATGAGTCAGACCACGAGACCCTTACAGCTATCAT  
GTCACCCATAATTGCAGAGCGTGATGCAATGAAAGAGAGCAGACTCATAG  
TGCTATTGGCGGTTTACCCCGCTCCTTCCGCATTCATTTAGAGGCACA  
GGGTACGATGAGAAAATGGTGGCTGAGATGGAGGGCTTGGAGGCTGCAGG  
GTCCACGTACATCTGCACACTTTGCGATTCCAGTCGTGTAGAAGCTTCTG  
AAAACATGGTGTGCTGCATTCATCACCCGCAGTCATCATGAGAATTTAGAG  
CGCTATGAAATATGGCGGACCAACCCCTTTTCCGAGTCTGTAGATGAGCT

ACGAGACAGAGTCAAGGGGTCTCTGCTAAGGCATTTATGGAGACTCATC  
CCACTCTGGATGCACTGCACTGTGAGATAGGCATCGCCACTGAATTTTAC  
AAAATCTTCCAGGATGAGATCGGGGAGGTGTACACTAAGGT---TAAC--  
-CCTAGTCGGGAGGAGCGGCCTGGATGGAGGGCAGCCCTGGATAAACAGC  
TGAGGAAGTCCATGAAGCTCAAACCAGTAATGAGGATGAATGGCAACTAC  
GCTCGCCGGCTCATGAGCCTGGAGGCTGTGGAGTTGGTGTGTGAGTTAGT  
GCCTACAAAAGGGAGGAGGGAGGCCCTGAGGGAGCTCATGAGGCTCTACC  
TCCAGATGAAGCCTGTGTGGCGTGCCACCTGTCTGCCAAAGAGTGTCCG  
GACCAGCTGTGCCGTATAGCTTCAACTCACAGCGCTTTGCAGAGCTCCT  
CTCTCCACTTTCAAATATAGATACAACAAAAAAATCACTAATTACCTCC  
ACAAAACCCTCGCCACGTTCCCGAAATCATAGAGAGAGATGGCTCGATA  
GGAGCATGGGCAAGCGAGGGGAATGAGTCAGCAAAACAAAGCCTACCCAT  
TGAGATGGGCCCCCTGGGGCCTAAGTGGAAAGGAGAGCCACAGCCTTTCT  
CCTGCTCCATCGAAGATCCCACAAAACAGACAAAAGTTCAAAGGCATCAAG  
ACATACATTTTCGTACCGGGTACAGCCGAGTCACACGGGACATCCCGTGTA  
CAGGCGTTACAAACACTTTGACTGGCTGTATAACC GCCTGCTGCATAAGT  
TTACTGTGATATCCGTGCCACCTGCCTGAGAAGCAGGCCACGGGGCGC  
TTTGAGGAAGACTTCATCGAGAAGCGCAAGAGGCGACTGATTCTGTGGAT  
GGACCATATGACCAGTCACCCCGTCTCTCCAGTACGAAGGCTTCGAGC  
ACTTTCTGATGTGCGCTGACGACAAGCAGTGGAAAGCTGGGCAAGAGGCGG  
GCGGAGAAGGATGAGATGGTGGGGGCCACTTCATGCTGACCCTTCAGAT  
CCCCACCGAGCACCAGGATCTTCAGGACGTGGAGGAGCGCATCGACTCCT  
TCAAGTGCTTCGCCAAAAAGATGGACGACAGCGTGATGCAGCTGACGCAC  
GTCGCCTCTGAGCTGGTGCGCAACACCTGGGCGGCTTCAGGAAGGAGTT  
CCAGCGGCTGGGAAATGCCTTCCAGTCCATCAGCCAGGCCTTCATGCTGG  
ACCCCTCTTACAGCTCGGAGGTCTGAACAACGCCATCTCCCACNNNNNNNNNTTCCTC  
AAACTGACCTCTCTGGGCTTCATCATTTGGTGTGCGCGTGGTTCGGAAACCT  
CCTGATCTCCATCCTGCTGGTCAAAGATAAGAGCCTGCACCGAGCGCCCT  
ACTATTTCCCTGCTGGACCTGTGCGCCTCGGACATTTCTCGATCCGCCATC  
TGCTTCCATTTGCTTTCACCTCCGTCAAGAATGGATCCGCGTGGACGTA  
CGGCACACTGACCTGCAAGGTGATCGCCTTCTGGGCGTGTCTCCTGTT  
TCCACACAGCGTTTATGCTGTTCTGCGTTAGTGTACGCGCTATTTAGCC  
ATAGCGCACCACCGTTTCTACACCAAGAGGCTGACCTTCTGGACCTGCCT  
GGCCGTCATCTGCATGGTTTTGGACGTTGTGCGGTGGCGATGGCGTTCCCGC  
CGGTGCTTGATGTGGGGACGTACTCTTTTATCCGGGAGGAGGACCAGTGC  
ACGTTCCAGCACCGCTCCTTCAGGGCGAATGACTCCCTGGGCTTCATGCT  
CCTCCTGGCTCTCATCCTCCTCGCCACACAGCTGGTTTACCTCAAGCTCA  
TCTTTTTCGTCCATGATCGCCGGAAGATGAAGCCTGTCCAGTTTGTGCCT  
GCTGTTAGCCAAAACCTGGACATTTACGGGCGGGTGCCAGTGGGCAGGC  
CGCCGCCAACTGGCTGGCTGGATTCGGGCGAGGCCACCCACCGACTC  
TGCTGGGCATCCGGCAGAACAGTAACGCGGCGGGCCGAGGCGTCTTCTG  
GTACTGGATGAGTTCAAACGGAGAAGAGGATTAGTAGGATGTTCTACAT  
CATGACGTTTTTCTTCTGGCACTGTGGGGGCCCTATTTGGTTCGCTGCT  
ACTGGCGGGTATTTGCAAGGGGCCCGTGGTCCCCGGAGGCTACCTGACA  
GCAGCCGTGTGGATGAGCTTTGCCAGGCCGGGTCAATCCTTTTCATCTNNNNNNNNNNNNNNNNNNNG  
CCAAATCTCGCTTTCACCCTGGCATGGGGACTGGTCTGGCACGGAGC--  
-GCAGCGTCCCCTCGGCAACAGCTTGCTATCCCCGCAGCAAAGCGAGGA  
GCCACTGTTGACACCCCCCGCAGCGATGGTTTGTACCC---CTGCCA  
ACAACCGACTGGACTTCGCAGCCTCGGCATACGACGCCGCT-----  
GATTTCCCGGTAACGCGGCCACCTTGTGTCTACGCAGCGGCCGGAGT  
GAAGGCTC-----TTCCTCTGCCGACCGCAGGCTGCTCCAACCGGCCTC  
TTGGCTATTACGCAGACCCGTCCG--GCTGG---GGAGGACGCACGCCG  
CCGCAGTACTGCGGCGTGAACAGCAAATCGGGTTCGGTCTTTTCTGCTG

GCCCCGAACGCGATCGGAGGCAGAGCCAGCA---CC---AGCTACCTGT  
-----CCGAGGA---GGGG---GACTC---CATCCCGGCAGAGAGG  
TCACCG---AT---TGGCAGCTCCGAGGAG---ACCAAACCCAAAGACGT  
ACC---GTCAGA---GTCGAACTGGGTAAAG---ACGCAGTCCTCCATCA  
AATCCATAGATTCAAGCGACTCTGGAATTTTTG---AACAGGCCAAACGG  
AGAAGGATCTCACCCACAGCGACCCCA-----GTTTCAGAGACAAT  
GTCCCCGTAAAGTCTGAGCATCACTCAACAGGCGAAGTCACAGAGAGAG  
AAGTGGCGTTGGGGATAAATCCGTTTGCAGATGGGATGGGCGCCTTCAA  
ATAAACACAGCTCCACGACATTGGCTCCGG---ACAGACGGCGTTTTTC  
TTCTCAGGCG---CCGGCTATGCAGCTGCAGCAGCCCTGGGA---CACC  
ATCA-----TCACCCGACCCACGTTGGTTCT---TACTCGACGGCGGCT  
TTCAACTCCACCAGGGACTTTCTCTTCAGAAATCGGGGATTTGGGGATGC  
CGCCGG-----GGCGCAGCACAGTTTGTTCGCGTC-----  
-CGGAAGTTT---C-----GCAGGGCCACATGGACTCAGAGGCAGCA  
GGGCACCTGCTGTTCCCGGGGCTCCACGAG---CAAGCGGCGAGCCACGC  
GTCTTCCAACGTGGTTAACAGCCAAATGCGCCTGGGCTTCTCSGGGGACA  
TGTATGGAAGAGCAGACCAGTACGGCCACGTTACGAGCCCACGTT---CC  
GACCATTACGCATCGACCCAGCTACACGGCTATGGCCCCATGAACATGAA  
TATGGCCGCG---CACCACGGAGCGGGGGCCTTCTTCCGATACATGAGGC  
AGCCGATCAAACAAGAGCTCATCTGCAAGTGGGTCGAGCCGGAGCAACTG  
TCAAACCCGAAAAAGTCGTGCAACAAAACTTTTAGCACTATGCACGAGCT  
GGTGACCCATCTCACCGTGGAGCATGTGGGGGACCGGAGCAGACCAACC  
ACATCTGCTTCTGGGAAGAATGCTCCAGGGAAGGAAAGCCGTTCAAAGCC  
AAATACAAACTTGTGAATCATATCAGAGTACACACGGGGGAGAAGCCCTT  
TCCGTGTCCGTTCCCGGCTGTGGCAA

>Thaleichthys pacificus

AGCCTCCTTATCCGAGCCGAGCTAAGCCAACCTGGTGCCCTTCTAGGGGA  
TGACCAGATTTATAATGTTATCGTCACTGCGCACGCTTTTGTATAATCT  
TTTTTATAGTTATAACCAATCATGATTGGAGGGTTTGGTAACTGGCTCATC  
CCCCTTATGATCGGAGCCCCGATATGGCCTTTCCCGCATAAATAATAT  
AAGTTTCTGACTTTTACCTCCCTCCTTCTCCTTTTAGCTTCTTCTG  
GTGTTGAAGCGGGAGCCGGAACCTGGCTGAACAGTTTATCCGCGCTTGCT  
GGCAATCTGGCCCATGCCGGAGCTTCCGTTGATCTAACAAATTTTCTCCCT  
TCACCTTGCGGGGATCTCCTCTATCTAGGGGCCATCAATTTTATTACAA  
CCATCATTAATATGAAGCCCCCTGCCATTTCCCAATACCAGACCCCCTTA  
TTCGTCTGAGCCGTCCTGATTACGGCCGTTCTTCTCCTTTCCCTCCC  
AGTTTCTAGCTGCTGGAATTACTATGCTTCTAACAGACCGAAATCTTACA  
CCACTTCTTTGACCCTGCCGGGGAGGGGACCCCATTTCTATATCAACAT  
TTANNNNNNNNNNNNNNNNNNNNNNNNNNNNNNNNNNNNNNNNNNNNNNN  
NNNNNNNNNNNNNNNNNNNNNNNNNNNNNNNNNNNNNNNNNNNNNNNNNN  
NNNNNNNNNNNNNNNNNNNNNNNNNNNNNNNNNNNNNNNNNNNNNNNNNN  
NNTTCTGGAGAGGAACCTGCACCCGTCCAACCTGCCTGGGCATGCTGCT  
GCTGTCCGACGCCACCAGTGCACCAAGCTGTCCGAGCTGTCTGGGGCA  
TGTGCCGAGCAACTTCCCGGCATCTGTAAGACGGAGGACTTCTCCAG  
CTCCCAAGGACATGGTGATTACGCTGCTGTCCCACGAGGAGCTGGAGAC  
GGAGGACGAGAGGCTGGTGTACGAGGCGGCCCTCAACTGGGTGAACACG  
ACCTGGAGAGACGCCACTGCGGCCCTGCCGGAGCTGCTGCGCACCGTCCGC  
CTGGCGCTGCTGCCCAGCATCTTCTCATGGAGAACGTCTCCACGGAGGA  
GCTGATCAACGCCAGGTGAAGAGCAAGGAGCTGGTGGACGAGGCCATCC  
GCTGCAAGCTGAAGATCCTGCAGAACGACGGCGTGGTCAACAGCCCCTGC  
GCCCCCCCCGCAAGACAAGCCACGCCCTGTTCTTCTGTTGGGCGGACAGAC  
CTTCATGTGCGACAAGCTCTACCTGGTGGACCAGAAGGCCAAGGAGATCA  
TCCCAAGGCGGACATCCCAGCCCCAGGAAGGAGTTCAGTGCTGTGCC

ATCGGCTGCAAGGTCTACGTACAGGGGGC--GGGGCTC-GGAGAATGG  
CGTGTCCAAAGATGTGTGGGTGTACGACACCGTGCAGGAGGAGTGGTCCA  
AGGGGCGCCGATGCTCATCGCCCGTTCCGGCCACGGCTCAGCTGAGCTG  
AAACTGCTCTACGTGGTGGGAGGGCATAACCGCGCCACGGGCTGCCT  
GCCGGCTCTCCCTCCGGACCAGTACATCGTGGTGTTCAGTCGCTCCCA  
ACCAGGCTGATCCTCAACGAGGCCGAGCTGATCCTGGCGTTGGCGCAGGA  
GTTCCAGATGAGGGTGGTGACGGTCTCCATGGAGGACCAGACCTACTCCA  
GCATCGTGCAGTTATCAGCGGAGCCTCCATGCTCGTCAGCATGCACGG  
GCTCAGCTCGTACCTCGCTCTTCCCTCCCAGAGGGGCGGCTGTGGTGA  
GCTCTTCCCCTACGCGGTACGCCCGAGCAGTACACCCCTTACAAGACCT  
NNNNNNNNNNNNNNNNNNNNNNNNNNNNNNNNNNNNNNNNNNNNNNNNNNNNNNNNNNNNNNNNNNNNNNNNNNNNNNNNNNNNNNNNNN  
NNNNNNNNNNNNNNNNNNNNNNNNNNNNNNNNNNNNNNNNNNNNNNNNNNNNNNNNNNNNNNNNNNNNNNNNNNNNNNNNNNNNNNNNNN  
NNNNNNNNNNNNNNNNNNNNNNNNNNNNNNNNNNNNNNNNNNNNNNNNNNNNNNNNNNNNNNNNNNNNNNNNNNNNNNNNNNNNNNNNNN  
NNNNNNNNNNNNNNNNNNNNNNNNNNNNNNNNNNNNNNNNNNNNNN--NNNNNNNNNNNNNN--  
NNNNNNNNNNNNNNNNNNNN--  
NNNNNNNNNNNNNNNNNNNNNNNNNNNNNNNNNNNNNNNNNNNNNNNNNNNNNNNNNNNNNNNNNNNNNNNNNNNNNNNNNNNNNNNN  
NNNNNNNNNNNNNNNNNNNNNNNNNNNNNNNNNNNNNNNNNNNNNNNNNNNNNNNNNNNNNNNNNNNNNNNNNNNNNNNNNNNNNNNNNN  
NNNNNNNNNNNNNNNNNNNNNNNAAGAGAGATCCCAGCAAGGGAACCTTGAGGATCAAATCAT  
CCAGGCTAACCTGCCTTGGAGGCTTTTGGTAATGCCAAAACCTTAAAGGA  
ATGACAACTCGTCACGTTTCGAAAATTCATCCGGATTCACTTTGGAACC  
AGTGGCAAGCTGTCTCAGCTGACATAGAGACTTATCTTCTGAAAAGTC  
ACGTGTCACCTTCCAACCTCAAGTCAGAAAGGAATTACCATATCTTCTTTC  
AGATCTTGTCCAATAAAAAGCCAGAGCTGTTGGACATGCTTCTGATTACC  
AACAAACCATATGACTACTCGTACATCTCCCAAGGAGAGGTAACAGTAGC  
ATCTATCAATGATGCTGATGAATTGATGGCCACTGACAGTGCCTTTGATA  
TCCTTGGCTTTACTCAAGAGGAGAAAATGGGGGTCTACAAGTTGACAGGA  
GCTATCATGCATTTTGGCAACATGAAGTTCAAGCAAAGCAGCGTGAGGA  
GCAGGCAGAGCCTGACGGCACTGAGGCGGCTGACAAGTCAGCTTACCTCA  
TGGGGCTGAACTCTGCAGATCTTGTGAAAGGACTCTGCCATCCCAGGGTC  
AAGGTTGGCAATGAGTATGTACCAAAGGGCAGGGTGTAGATCAAGTCTA  
CTATCCCAACAAGGAGGCCTTCAAGTGTGAGGAGTCCGGGAAGCACTACA  
ACACCAAGCTGGGATATAAGCGCCATGTGGCCATGCACTCTGCCACGTCA  
GGGATCTCACCTGCAAAGTGTGCATGCAGAGCTATGAGAGCACACCCGT  
GCTCTTGGAGCACCTCAAGACCCACTCGGGGAAGTCTTCGGGCGGCACCA  
AGGAGAAAAAGCACCCGTGCGACCCTGTGACCGTCTTCTACACGCGC  
AAGGATGTGAGACGGCACATGGTGGTCCACACGGGTCGAAAGGACTTCCT  
CTGCCAGTACTGTGCCAGCGCTTCGGCAGGAAGGACCATCTGACACGTC  
ACGTGAAGAAGAGCCACTCGCAGGAGCTGCTGAGGATCAAGACGGAGCCT  
CCGGATATGTTGGGTCTTTTAGCGTCCGGGTACCACCTTGCTCTGTGAA  
GGAGGAGCTCAGCCCATGATGTGCGGCATGGGTCCCAACAAAGACCCCA  
TGATGGGCAAACCGTTCCCCAGCGGGGCCCTTTTCCGATGGGCATGTAC  
AACCCCAACCAT-----CTCCAGGCCATGTCTAATTCTGGGGTGGGTCA  
CCCG-----CACCCTGCCCTGATGCCAGTCCCTTGCTCTGCAGCTATGG  
GCATGGGCTGCCACATGGAATACCTGATATACGCCCTCCTTCTCCTTCATG  
GGGTGTCTGCAGATCAGCGACGGGTCCAACGTGGTCAACCTGCTGGCCAG  
TAACTCTCCCAGCGTCTCCTACGCCATGACGCAGCAGAAATACTTCAGCA  
ACTACAGCCCTGTGATCGGCTTCTACATCTACGAGCCGATTGAGTACTGG  
AACTCCACGGTGCAAGAGCACCTGAGGACGCTGGGACACGGCTTCAATAA  
GATCTCCTGGATCGACAATACTTCCACTACCTGAAGGTGGTGAACGTGA  
GCGCCTCCACCAAGAGCGACTTCACTCCATCCCTCAAAGGCTCATTCCTG  
CAGAGCCCAGAGTACCAGCACTTACGGAGGACATCATCTTCTCCAAGA-  
--ACGGCG-----AGGAGTACGACATCATTGCGTCCAGGATGT  
ACCTGGTGGCCCGGACCACGGAGAAGACGCGGAGGAGGTGGTGGAGCTT

CTGGAGAGACTCCGCCCCCTGTGCTCATCAACAGCATCAAGTTCATCGT  
GTTCAACCCACCTTCGTCTTCATGGATCGCTACATCTCCTCCGTCATCT  
CGCCATCCTCACCTCTAGCTTCAGCGTCCTCACCATCCTCATCCTCACC  
ATCTTCTGTTGGTGGTCAGCCCCCTCGGGAACCTTCTGGCTGATCCTGACAGT  
GACGTCAGTGGAGCTAGGCGTGCTGGGCCTGATGGGCTATCATCCCTTCG  
AATGGCAGCCGGCCCTCCGGAACGTTTCCCCGGCTGTCAGGTGGGCATC  
ATCGACGGCCTGTCAGGATGGACAGCTTCGGTGGACGACTCCCCAGCGGA  
CACCATCTCGCGGAGGTTCCGCTACGACGTGGCTCTGGTGTCTGCCCTGA  
AGGACCTGGAGGAGGACATCGTGGAGGGCTTGAGGGAGCACGGCCTGGAA  
GACAGTTCCTGCACCTCCGGCTTACCCTGACCATCAAGGAGTCTGTGA  
TGGCATGGGGGACGTCAGTGAGAAGCACGGAGGGGGCCGGCCATTCTG  
AAAAGGCCGTCCGCTTCTCCATCACCCTCATGTCCGTCTCCGTCTGGCC  
GAGGGGGAGGAG-----GAAGCGGT  
CACCGTCTTCAGAGAGCAGAAGCCAACTCGGAGATGTCCTGCAAACCTC  
TCTGCCCTGATGTTTGTGGACGAGTCGGACCACGAGACCCTGACGGCCATC  
TTGGGGCCTGTGGTGGCCGAGAGGAACGCCATGAAGAACAGCCGCTCAT  
ACTGGCCATGGGCGGCTCCCTCGCTCCTTCCGCTTCCACTTCAGGGGCA  
CAGGCTATGACGAGAAGATGGTGC GCGAGATGGAGGGCCTGGAGGCTTCA  
GGCTCCACCTACGCTTGCACCCTCTGCGACGCCACCAGAGCTGAGGCCTC  
CAAAAACATGGTGTCTCCACTCAGTCACCCGCAGCCACGACGAGAACCTGG  
ACCGCTACGAGCTGTGGAGGACCAACCCCTACTCTGAATCGGCGGACGAG  
CTGCGAGACCGGGTAAAGGGGTCTCCGCCAAGCCCTTCATGGAGACCA  
GCCACACTGGACCGCTGCACTGTGACATCGGCAACGCCACCGAGTTCT  
ACAAGATCTTCCAGGACGAGATCGGGGAGGTGCATTGCAGGCC---CAAC  
---CCGAGCAGGGAGGAGCGTCGGAGCTGGAGGGCGGCTCTGGACAAGCA  
GCTCAGGAAGAAGATGAAGCTGAAGCCCGTGATGAGGATGAACGGAAACT  
TTGCCCGGCGACTGATGACGGCGGAGGCGGTGGAGGTGGTGTGCGAGCTG  
GTGCCGTGCGAGCAGCGGAGCGAAGCCCTCAGGGAGCTGATGAACCTCTA  
CATCCAGATGAAGCCCGTGTGGCGCGCCACGTGCCAGCCAAAGAGTGCC  
CCGACCAGCTGTGTCGCTACAGCTTCAACTCCCAGCGCTTCGCTGACCTC  
CTCTCYTCCACCTTCAAGTACAGGTACGACGGGAAGATCACCAACTACCT  
CCACAAGACTCTGGCCACGTTCTGAAATCATAGAGAGAGATGGCTCCA  
TCGGGGCCTGGGCCAGTGAGGGGAACGAGTCGGGAAACAAATCATACACC  
ATTGAGATGGGCCCCAAAAGGGCCCCAGTGAAAGAGAGCCCTCAGCCGTT  
CTCCTGTTCTGTGGAGGACCCTACCAAACAGACCAAGTTCAAAGGCATCA  
AGACCTATATATCTTACAGGGTCACCCCCAGCCACACAGGGCGACCCGTC  
TACCGCCGGTACAAGCACTTCGATTGGCTATAACAACCGTCTGCTGCATAA  
GTTACCGTCATCTCTGTGCCTCACCTGCCGGAGAAACAGGCCACAGGAC  
GTTTTGAGGAGGACTTCATCGAGAAGCGCAAAAGACGGTTGGTCATCTGG  
ATGGACCACATGACCAGTCATCCTGTCCTATCACAGTACGAGGGCTTGGA  
ACACTTCCTCATGTGTGCTGATGACAAGCAGTGGAAGCTGGGCAAGCGGC  
GGGCGGAGAAAGATGAGATGGTGGGTGCCCACTTCATGCTGACCTTTCAG  
ATTCCCAACGAGCACCAGGACCTGCAGGACGTGGAGGAGCGAGTGGACAC  
CTTCAAGTCCTTTGCCAGGAAGATGGATGAAAGCGTCATGCAGCTGACCC  
ACGTCGCCTCAGAACTGGTTCGAAAACACCTTGGTGGCTTCAGGAAAGAG  
TTTCAGCGCCTGGGAAACGCGTTCCAGTCCATCAGTCAGGCTTTCATGCT  
TGACCTCCTCACAGCTCGGATGCCCTCAACAATGCCATCTCACACCCTC  
TTGCCAGTTCTTCAACTGACCTCCTTGGGTTTCATCATCGGCGTTGGA  
GTGGTCGGCAATCTTCTGATCTCCATCCTACTGGTCAAAGACAAGAGCCT  
GCACCGAGCGCCCTACTACTTCCCTGCTGGACCTGTGCGCCTCCGACATCC  
TGCGTTCGGCCATCTGCTTCCCCTTCGTGTTACCTCCGTCAAGAATGGT  
TCCGCTGGACGTACGGAACCCTAACCTGCAAAGTGATCGCCTTCTGGG  
GGTCTGTCTGTTTTACACGGCCTTCATGTTGTTCTGCGTCAGCGTGA

CCCGCTACCTGGCCATCGCCACCATCGCTTCTACACCAAGAGGCTGACC  
TTCTGGACGTGCTTGGCCGTCATCTGCATGGTGTGGACGCTGTCAGTGGC  
CATGGCCTTCCCCCGGTGCTGGATGTAGGGACGTACTCCTTCATCAGGG  
AGGAAGACCAGTGACACTTCCAGCACCCTCCTCAGAGCCAACGACTCC  
CTGGGCTTCATGCTGCTGCTCGCCTCATCCTGCTGGCCACGCAGCTGGT  
CTACCTCAAGCTCATCTTTTTTCGTCCACGACCGCCGGAAGATGAAGCCGG  
TCCAGTTCGTGCCGGCGGTGAGCCAGAACTGGACCTTCCACGGGCCC  
GCCAGCGGCCAGGCGCGGCTAACTGGCTGGCGGGCTTCGGGAGAGGCC  
CACTCCGCCACCCTTCTGGGCATCAGGCGAACAGCAACGCGGCGGGCC  
GCAGGCAGTCTCGTGGTGGACGAGTTCAAGACGGAGAAGAGGATCAGC  
CGGATGTTTTACATCATGACCTTCTTCTTCTGGCACTGTGGGGTCCCTA  
TCTGGTGGCCTGCTACTGGAGAGTGTTCGNNNNNNNNNNNNNNNNNNNN  
NNNNNNNNNNNNNNNNNNNNNNNNNNNNNNNNNNNNNNNNNNNNNGCCAAAT  
CTCGCTTTCACCT  
GGCGTAGGGACTGGTCTGTCAGCAGGACC---GCAGCGTCCCACTTAGTAA  
CAGCTTGCTATCCCCGCAACAAACCGAAGAGCCACAGTTG---CTTCCC  
CACAGCGTTGGTTTTGTCACCC---CTGCCAACAACCGACTGGACTTTGCC  
GCCTCGGCATACGATGCTGCCGCTGCTGCAGATTTTGCCGGCAACGCGGC  
CACCTTGCTGTCTTACGCAGCGGCTGGAGTGAAGCGC-----TTCCC  
TCTCCACGGCAGGTTGCTCCAACAGACCGCTCGGGTATTACGCCGACCCG  
TCAG---GCTGG---GGCGCCGTACGCCACCACAGTACTGT-----  
-AGCAAGTCGAGCTCCGTTCTCTCATGCTGGCCACGAATACTGTTACCG  
GCAGAACGGGAC---CGTCCAGTTACCTGG-----CCGAGGA---G  
GGA---GACGC---CATTCCCACAGAGCGGTCTCCA---AT---AGGGGC  
GTCAGACGAG---GCAAAACAAAAGACTT-----GTCCGA---ATCCA  
ACTGGATAGAG---ACGCCGTCTTCAATAAAGTCAATTGATTCCAGTGAT  
TCTGGAATCTTTG---AGCAAGCAAACGGAGAAGAATTTCTCCGTCTGC  
CACACCA-----GTTTTGGAGACGGTGTCCCGTTAAAATCCGAA-  
-----ACAGGCGAAGTCACAGAAAGAGAAGTGGCTTTGGGGATAAAT  
CCGTTTGCAGACGGGATGGGTGCTTTCAAATCAACCACAGTTTCGCATGA  
TCTTGGCTCCGG---GCAAACTGCATTTTCTTCCCAAGCG---CCC GGCT  
AC---GCAGCCGCTGCACTGGGA---CATCACA-----CCACCCGACT  
CATGTCAGTTCT---TACTCTACGGCGGCTTTCAATCCACCCGGGATTT  
TCTCTTCAGAAATCGAGGCTTCGGAGACGCTACCAG-----CG  
CTCAGCATAGTCTCTTCGCCTCCGC---AGCGGGAAGTTT---T-----  
GCAGCCCCACATGGACACTCAGATGCAGCGGACACCTGCTCTTCCAGG  
ACTTCACGAA---CAAGCCGCGAGCCATGCTTCCCTCAAATGTTGTTAATA  
GTCAGATGCGATTGGGCTTTTCGGGGACATGTACGGCAGGGCCGACCAG  
TATGGCCACGTTACAAGCCC GCGGT---CCGACCATATGCTTCGACCCA  
GTTGCATGGCTATGGCCCTATGAACATGAATATGGCTGCG---CATCATG  
GAGCAGGGGCTTCTTCCGTTACATGAGGCAGCCGATAAAAACAAGAGCTG  
ATCTGCAAGTGGATCGAACC GGAGCAACTAACGAACCCGAAAAAGTTCGTG  
CAACAAAATTTTAGCACAAATGCACGAGCTCGTCACCCATCTGACGGTGG  
AGCATGTGGGAGGACCGGAGCAGTCGAACCACATTTGCTTCTGGGAAGAG  
TGTGCCCGAGAAGGAAAACATTCAAAGCTAAATACAACTTGTGAACCA  
CATCAGAGTGACACCCGGAGAGAAAACATTTCATGTCCATTTCCCGGTT  
GTGGCAA

>Thymallus brevirostris  
AGTCTCCTTATTCGAGCCGAATAAGCCAGCCCGGAGCCCTTCTGGGTGA  
TGATCAAATTTATAATGTGATCGTACGGCCATGCTTTCGTTATGATTT  
TCTTTATAGTCATGCCAATTATGATTGGTGGGTTTCGGAACTGATTAATC  
CCCCTTATGATTGGTGGCCCTGATATAGCCTTTCCCGAATAAATAACAT  
GAGCTTTTGACTACTTCCCCATCCTTTCTCCTTCTTCTAGCCTCATCTG



GGGTTGAAGCCGGGGCCGGGACAGGGTGGACAGTATATCCCCCTCTGGCA  
GGTAACCTGGCCCACGCAGGAGCCTCTGTAGATTTAACTATCTTCTCCCT  
TCACTTAGCTGGTATTTCTTCTATTTTGGGGGCCATTAATTTTATTACAA  
CCATTATCAACATGAAGCCCCAGCGATTTCTCAATACCAAACCCCTCTT  
TTTGTATGGGCTGTTCTGATTACCGCCGTCCTATTACTTCTCTCTCTGCC  
TGTCTTGACAGCAGGCATCACAAATGTTACTCACAGACCGAAATCTTAATA  
CCACTTCTTTTGACCCAGCAGGAGGAGGGGACCCAATCCTTTTATCAACAT  
CTATTTTGATTTTTTTGGCCACCCAGAAGTTTATATTCTTATTCTTCCAGG  
CTTCGGTATAATTTTACACATCGTTGCATACTACTCTGGTAAAAAGAAC  
CCTTTGGATATATAGGCATGGTTTGGAGCCATGATAGCCATTGGTCTCTTG  
GGTTTATCGTTTGGAGCCATCACATGTTTACTGTTGGTATGGACGTCGA  
CACTCGTGCCTA-----  
-----  
-----  
-----  
-----  
-----  
-----  
-----  
-----  
-----  
-----  
-----  
-----  
-----  
-----

-----GGACGAGTACATCGTAGTGTTTCAGT  
CGTTCATCAACAGACTCATCCTGAAAYGAAGCAGAGCTGATCCTGGCATT  
GGCGCAGGAGTTCCAGATGAGAGCCGTGACTGTGTCTCTGGAGGAGCAGA  
CCTTCCCAGCATCGTCAAGGTCATCAGCGGGGCCCTCCATGTTGGTCAGC  
ATGCATGGGGCCCAGCTGGTCTCCTCTCTCTTCCCTCCCCGGGGGGCCGT  
CGTAGTGGAGCTCTTCCCCTATGCCGTCAAYCCAGAGCAGTACACCCCTT  
ACAAAACCCTGGCCTCTCTACCAGGCATGGACCTGCAGTATGTGGCCTGG  
AGGAACATGGTGGAGGAGAATCAGTGGCCCACCCAGAGAGGCCCTGGGA  
GCAGGGAGGTATAGCCACCTGGAGAAGGAAGAGCAGGAGCACATCCTGG  
CCAGTAARGAAGTACCCARACACCTGTGCTGCCGCAACCCTGAGTGGCTC  
TATCGCATCTACCAGGACACCATAGTGGAAATCCCTTCTTTACTAGAGAC  
TCTCAG---AGAGACMGTGAAA---ACMAGGCCCAACCTGAAGAA---GG  
CCAAGCCTGCCAGCACGGTCCACCCGGGCCGGGTTCAGAGAGCCCCAGTGC  
CAGACGTCGGTCCAGGCCACCAACGAGGCCAAGCTGACTGTGTGCTGGCA  
AATCCCCTGGAACCTCAAGTACCTGAAGGTCAGGGAGGTGAAATACGAAG  
TATGGATCCAGAAGAGGGATCCAAGCAAGGACCCCTGGAAGATCAAATC  
ATCCAGGCTAATCCTGCACTGGAGGCTTTCGGTAAATGCCAAAACACTGAG  
AAATGACAACTCATCACGTTTTCCGGTAAATTCATCCGTATTCACCTCGGCA  
CCAGTGGGAAACTATCATCTGCCGACGTAGAGACTTACCTTCTTGAGAAG  
TCCCGTATCACCTTTCAGCTCAAAGCTGAGAGGAACTACCACATTTTCTT  
CCAGATATTGTCCAACCAAAAGCCAGAGCTGTTGGACATGCTGTTAATCA  
CCAACAATCCATATGACTACTCCTACATCTCTCAAGGAGAGGTAACAGTA  
GCATCCATCAATGATTTCTGAGGAACTGATGGCCACTGACAGTGCCTTCGA  
TGTACTIONGGCTTTACTGCAGAGGAGAAACAGGGGGTCTACAAGTTGACAG  
GTGCCATCATGCACTACGGTAAACATGAGGTTCAAACAAAAGCAGCGGGAA  
GAGCAGGCAGAGCCTGACGGTACAGAAGCTGCTGACAAGTCAGCTTACCT

TATGGGAATAAACTCTGCAGATCTGATTAAAGGACTTTGCCATCCCAGAG  
TCAAGGTTGGCAATGAGTATGTCACCAAAGGTCAAGGTGTAGATCAGGTC  
TACTACCCCAACAAAAGAGGCCTTCAAGTGTGAGGAGTGTGGCAAGCACTA  
CAACACCAAGCTGGGCTACAAGCGTCACGTGGCCATGCATTCAGCCACGG  
CAGGGGACCTCACCTGTAAGGTGTGCCTGCAGAACTATGAGAGTACCCCT  
ACCTGTGGAGCATCTCAAGAGCCACTCGGGCAAGTCCTCCGGAGGTGC  
CAAGGAGAAGAAGCACCCGTGTGACCCTGTGACCGCCGCTTTTACACAC  
GGAAGGACGTGCGCCGCCACATGGTGGTCCACACCGGCAGAAAGGACTTC  
CTGTGTCAGTACTGTGCCAGCGCTTCGGCAGGAAGGACCACCTGACGCG  
GCATGTGAAGAAGAGCCACTCTCAGGAGCTGCTAAAGATAAAGACGGAGC  
CTCCGGACATGCTAGGCCTGCTGGGCTCTGGCTCCTCCCCCTGCACTGTC  
AAAGAGGAGCTCAGCCCCATGATGTGCAGCATGGGTCCCAACAAAAGACCC  
CATGATGGTCAAGCCGTTCCCCAGCGGCACCCCTTCCCCATGGGCATGT  
ACAACCCCCACCAC-----CTCCAGGCTATGTCCAACCCTGGGGTGGGT  
CAC-----CACCCTCTCTGATGCCCGGCTCCTTGTCTGCTGCCAT  
GGGGATGGGCTGCCACATGGAGTATCTGATCTATGCCCTCCTTCTCCTTCA  
TGGGATGTTTACAAAATCAGTGTGGATCCAACATCGTCAACCTCCTAGCC  
AGCAACACGCCCAGTGTGTCCTACGCCACGACCCAGCAGAAGTACTTCAG  
TAACTACAGCCCCGTGATCGGCTTCTACATCTATGAGCCCATCGAGTACT  
GGAACTCCACGGTGCAGGAGCACCTCACAACACTGAGCCACGGCTTCAAC  
AAGATCTCCTGGATGGATAACTACTTTCAGTACCTGAAGGTGGTGAATGT  
GAGCGCTCGACCAAAAAGTGATTTTATCACCATCCTGCAGGGCTCCTTCC  
TGCGCAGCCCGGAGTATCAGCACTTCATGGAGGACATCATTCTGTCCAAG  
ACAGATGGAG-----ATGAAATGGAGATCATCGCGTCCAGGAT  
GTACCTAGTGGCGCGGACCACAGAGAAGACACGGGAGGAGGTGGTGGAA  
TGCTGGAGAGGCTCCGCCCCCTCTCGCTCATCAACAACATCAAGTTCATC  
GTCTTCAACCCACCTTTCGTCTACATGGACCGTTATAGCTCCTCCGTGGT  
CTCACCCATCCTCACATCGGCCCTCAGCGTGCTCACCATCCTCATCCTCA  
CCTTCTTCTTGGTTCATCAACCCTCTGGGAACTTCTGGTTGATCCTGACC  
GTCACCTCCGTAGAGCTGGGGGTCTGGGCCTCATGNNNNNNNNNNNNNNNNNN  
NNNNNNNNNNCACCTCCTGCCATG  
TGGGGATCATTGACGGGCTATCAGGGTGGGTTCGCTTCGGTGGACGACTCC  
CCAACAGACACAGTCACGCGTCCGGTTCGGCTACGACGTGGCCCTGGTGT  
GGCCTTGAAGGACCTGGAGGAGGAAATCATGGAGGGGCTGAGAGAGCGAG  
GCCTGGAGGACAGTATTGCACCTCAGGCTTCAGCGTCATGATCAAGGAG  
TCCTGCGATGGCATGGGGGACGTGAGTGAAGCATGGCGGAGGGCCTGC  
CATCCCGAAAAGGCTGTGCGTTTCTCCTTACCATCATGTCCGTTTCAA  
TTCAAGCTGAGGGAGAAGAT-----  
GAGGCGATCACCATTTTCCAGGAGCCCAAGCCCAACTCAGAGATGTCCTG  
CAAGCCTCTCTGCCTGATGTTTGTGGACGAGTCAGACCACGAGATGCTCA  
CAAGCGTCCCTGGGGCCTGTTAAGGCCGAAAGGAATGCTATGAAGCACAGC  
CGTCTCATCCTGTCTGTGGGAGGCCTTTCTCGCTCCTTCCGCTTCCACTT  
CCGGGGCACGGGCTACGACGAGAAGATGGTGGGAGAGATGGAGGGTTTGG  
AGGCCTCTGGCTCCACTTACATCTGCACCCTGTGTGACTCCACTCGGGCA  
GAGGCTCCCACAACATGACTCTTCACTCTGTACCCGCAGCCACGACGA  
GAATCTGGAGCGTTACGAACCTTGGAGGACCAACCCTTATTCTGAGTCAG  
CTGAGGAGCTGCGAGACAGAGTCAAAGGTGTCTCTGCCAAGCCCTTCATG  
GAGACCCAGCCACACTGGACGCCCTACACTGTGATATCGGCAACGCCAC  
CGAGTCTACAAGATCTTCCAGGATGAGATAGGGGAGGTCTATCACAAGG  
C---CAAC---CCCAGCCGGGAGCAGCGTCCGGAGCTGGCGGGCCGCCCTG  
GACAAACAGCTGAGGAAGAAGATGAAGCTGAAGCCTGTAATGAGAATGAA  
TGAAACTATGCACGGAAGCTGATGACCCGGGAGGCAGTGGAGGCAGTGT  
GTGAGCTGGTGGCTCAGAGGAACGTCAGGAAGCCCTGAGGGAGCTGATG

GGGCTCTACATCCAGATGAAGCCTGTGTGGCGCTCCACCTGCCCGGCCAA  
GGAGTGCCCAGATCAGCTCTGCCGGTATAGCTTCAACTCCCAACGCTTCG  
CAGAGCTGCTCTCCACCGTCTTTAAGTACAGGTATGACGGCAAGATCACC  
AACTACCTGCACAAGACTTTGGCCACGTGCCAGAGATCGTGGAGAGGGA  
TGGCTCCATTGGGGCCTGGGCCAGCGAGGGGANNNNNNNNNNNNNNNNNTCGTACACCATTGAGATG  
GGCCCCAAAGGGCCTCAATGGAAAGAAAGCCCCACACCTTTCTCTTGCTC  
CATCGAGGATCCTACCAAGCAGACCAAGTTCAAAGGCATCAAGACCTACA  
TATCGTACCGAGTGACCCCAAGCCACAATGCGAGGCCTGTGTACCGGCGT  
TACAAGCACTTTGACTGGTTGTACAACCGTCTACTGCACAAGTTCACAGT  
CATCTCCGTGCCCCACCTCCCCGAGAAACAGGCAACGGGCGCTTCGAAG  
AGGATTTTCATCGAGAAACGCAAGAGGGCGGCTGATCCTATGGATGGACCAC  
ATGACCAGCCACCCGGTCTGTGCGCAGTACGAGGGCTTCGAGCACTTCCT  
CATGTGCGCCGACGACAAGCAGTGGAAGCTCGGCAAGAGGGCGGGCAGAGA  
AGGACGAGATGATGGGCGCCAACCTTCATGCTCACCTTCCAGATCCCAAAC  
GAGCACCAGGACCTGCAGGACGTGGAGGAACGCGTGGACTCCTTCAAGTC  
CTTCGCCAAGAAAATGGATGACAGCGTCATGCAGCTTACGCATGTGGCCT  
CGGAACTGGTGCAGGAAACACCTCGGAGGCTTCCGGAAGGAATTTACAGCGG  
CTGGGGAACGCTTTCCAGAACGTACAGTCAGGCGTTCATGCTGGACCCTCC  
CCACTGCTCAGACGCTCTCAACACCNNNNNNNNNNNNNN-----

-----GCCAAATCTCGCTTTCACCCTGGCGTAGGGACTGGTCC  
TGGCACGGACC--GCAGCGTCCCACCTTAGTAACAGCTTGCTATCCCCGC  
AACAAACCGAAGAGCCCACAGTTG--CATCCCCGCAGCGATGGTTTGTC  
ACCC--CTGCCAATAACCGACTGGACTTTGCCGCTCGGCATACGATGC  
CGCCGCGGCTGCTGATTTTGCCGGTAACGCGGCCACCCTCCTGTCATACG  
CAGCGGCTGGAGTAAAGGCAC-----TCCCCCTGCCACTGCAGGGTGC  
TCAAGCAGACCACTAGGTTACTATGCCGACCCATCCG---GTTGG---GG  
CACACGCACACCACCCAGTACTGC-----AGTAAGTCTAGCCCTG  
TTCTCTCTTGCTGGCCCACAAATCTGTGGTGGCAGAACAGGCA---CC  
TCTAACTACCTGG-----TTGATGA---CGCC---GATAC---CAT  
CCCAACAGAAAGGTCACCC---AT---CGGAGGGTCTGATGAG---GCAA  
AACCAAAAGACTT-----ATCCGA---ATCCAGCTGGATAGAG---ACG  
CCGTCTCAATCAAGTCGATTGATTCAAGTGATTCTGGCATCTTTG---A  
GCAAGCCAAACGGAGAAGAATTTACCGCCTGCCACACCG-----G  
TTTCGGAAA-----CCATTTGAAATCTGAG-----ACAGGCGAA

GTCACAGAAAGAGAAGTGGCTTTGGGGATAAATCCGTTTCGCAGACGGGAT  
GGGAGCTTTTAAAAATAAACACAGCTCCCAYGACCTGAGCTCAGG---AC  
AGACGGCATTCTCTTCCCAGGCT---CCCGGCTAT---GCTGCTGCCGCC  
CTGGGT---CACCACCA-----CCACCCGACACACGTCAGCTCC---TA  
CTCCACCGCAGCCTTCAACTCCACCCGGGACTTTCTCTTCAGAAATCGGG  
GCTTCGGAGACGCAACCAG-----CGCGCAGCACAGCCTGTTT  
GCCTCGGC---AGCGGGAAGTTT---T-----GCAGGGCCACATGGACA  
CTCCGATGCCRCGGGGCACCTGCTCTTCCCGGGACTCCACGAG---CAAG  
CCGCCAGCCATGCGTCRTCTAATGTYGTCAACAGCCAGATGCGSCTTGGC  
TTTACCGGGGACATGTACGGCCGGGCTGACCAGTATGGACACGTTACGAG  
TCCCCGCT---CCGACCACTACGCTCCACCCAGCTGCATGGCTATGGCC  
CTATGAACATGAACATGGCGGCT---CACCACGGGGCAGGGGCTTCTTC  
CGATACATGAGGCAGCCCATCAAAACAAGAGCTMATCTGTAAGTGGGTAGA  
GCCAGAACAGTTGTGCAACCCCAAAAAGGCTTGCAACAAAACCTTTCAGCA  
CGATGCACGAGCTTGTGACCCACCTGACAGTGGAGCATGTGGGGGGACCG  
GAGCAGTCGAACCATATTTGCTTTTGGGAAGAGTGCCTCCGAGAAGGAAA  
ACCGTTCAAAGCCAAATACAAACTTGTAATCATATCAGAGTGCACACCG  
GAGAGAAACCATTCCCATGTCCCTTCCCCGGCTGTGGAAAA

>Toxotes jaculatrix

AGCCTCCTTATTTCGAGCAGAAGCTTAGCCAACCTGGTGCTCTTCTGGGAGA  
CGACCAGATTTACAATGTAATTGTTACGGCCACGCCTTTGTAATAATTT  
TCTTCATAGTCATGCCATTATAATTGGAGGCTTTGGGAAGTACTCATC  
CCCCAATGATTGGTGCCCTGATATGGCATTCCCCCGAATGAACAACAT  
AAGCTTCTGGCTCCTACCACCTCCTTCCTGCTGCTTCTTGCCATCATCTG  
GTGTCGAAGCAGGCGCCGGTACTGGCTGAACAGTCTATCCTCCTCTAGCC  
GGTAATCTGGCCCATGCAGGAGCATCTGTGATCTAACCATCTTCTCACT  
TCACCTGGCCGGGGTCTCCTCAATTCTCGGTGCAATCAACTTCATTACAA  
CCATCATCAACATAAAACCAACGGTTGTCACTATATACCAAATTCCCCTA  
TTTGTGTTGAGCCGTCCTCATTACAGCCGTCCTTCTCCTCCTTTCCTACC  
CGTCCCTAGCTGCTGGCATCACTATGCTCCTTACAGATCGAAACTTAAACA  
CTGCCTTCTTCGACCCAGCAGGAGGAGACCCCATTCCTTTACCAACAC  
CTGTTT-----  
-----  
-----  
-----

-----TTCCTGGAGAGAAACCTTACCCGTCTAACTGTCTTGG  
CATGTTGTTGCTGTCTGACGCCCACAGTGTACCAAGCTGTCAGAGCTCT  
CCTGGGGCATGTGCCCTCAGCAACTTCCCTGCTATTTGCAAGACAGAGGAC  
TTCTCCAACCTGCCAAAGATATGGTGGTGCAGCTTTTGTACACAGAGGA  
GCTAGAGACTGAAGATGAGAGACTGGTGTATGAAGCTGCCCTTAACTGGA  
TCAACTATGACCTGGAAAGGAGGCACTGCCACCTTCCAGAGCTTCTGAGA  
ACGGTCCGCCTCGCCCTGCTGCCTGCCATCTTTCTGATGGAGAATGTCTC  
CACAGAAGAGCTGATCAACGCCCAAGGCAAGGAACTGGTGGATG  
AAGCTATCCGCTGTAAGCTGAAAAATCCTGCAGAATGACGGCGTTGTTAAC  
AGCCCGTGTGCTAGACCAAGAAAAACAGCCATGCTCTCTTTCTCTGCGG  
AGGGCAGACTTTCATGTGTGACAAGTTGTACCTGGTAGACCAGAAGGCCA  
AAGAAATTATCCCCAAGGCTGACATCCCCAGCCCCAGGAAGGAGTTCAGC  
GCCTGTGCCATCGGCTGTAAGGTGTACATCACTGGTGGGA--GAGGCTC-  
AGAGAATGGTGTGTCTAAAGATGTGTGGGTCTACGACACCGTCCACGAAG  
AATGGTCAAAGCAGCTCCCATGCTCATCGCCAGGTTTGGCCATGGCTCT  
GCGGAGCTGAAGCACTGCCTCTACGTGGTAGGAGGTCACACCGCATCAAC  
AGGCTGCCTCCCGGCTTCCATCCGGACGATTACATTTGTTGTGTTTCACT  
CGTTCAACAACAAGACTGATACTTAATGAGGCGGAGCTAGTCATGGTGCT

GGCCAGGAGTTCCAGATGAGGGTGGTCACTGTATCCCTGGAGGAACAGT  
CTTTCCCTGGTATTGTCCAGGTGATCAGCAGTGCCATGTTAGTCAGT  
ATGCATGGAGCTCAGCTTATCACCTCACTCTTCCCTCCCTAGAGGAGCTGT  
TGTAAGTGGAACTGTTCCCTTTGCTGTGAACCCAGAACAGTACACCCCAT  
ATAAAAACCTTACCTCCCTTCCAGGGATGGACCTTCACTATATCTCCTGG  
AGGAACACTAAGGAGGAAAACACCATCACCCACACAGATAGACCTGGGA  
ACAAGGAGGCATTGCTCACTTGGAGAAGGAGGAGCAGGAGCGAATACTTA  
CCAGTAAGGAGGTCCCCAGGCACCTCTGCTGCCGCAACCCAGAGTGGCTC  
TTCCGGATCTACCAGGACACTTTAGTGGACATCCCTTCCCTTCCCTGGAAGT  
CCTCAA---AGAGGGCATGAAG---ACCAAGCCATCTTGAAAA---GT  
CAAAGCCGGCCAGCACGGTCCACCCTGGCCGAGTTAGAGAACCCAGTGT  
CAGACTTCAGTACAGACCTAATGAGGCTAAACTCACAGTCTCCTGGCA  
GATCCCATGGAATCTGAAATACCTGAAGGTAAGAGAGGTGAAGTACGAGG  
TGTGGATCCAGAAAAAGACACCAGCAAGGGGACGCTGGAGGATCAAATC  
ATCCAGGCAAATCCTGCACTAGAGGCCTTTGGGAACGCCAAAAACAGTAAG  
AAACGACAATTCATCTCGTTTTGGAAAATTCATTCGTATTCACTTCGGAA  
CAAGTGGCAAATGTCGTGCTGACATTGAGACATACCTGCTGGAGAAG  
TCACGTGTCACCTTTCAGCTCAAGGCTGAGAGGAACTACCACATCTTCTA  
CCAGATCCTGTCCAATCAAAGCCAGAGCTGCTGGACATGCTGCTGATCA  
CGAACAAACCCATATGACTACTCCTACATCTCCCAAGGAGAGGTAACAGTT  
GCCTCCATCAACGACTCAGATGAGCTGATGGCTACTGACAGCGCCTTCGA  
TGTGCTCGGTTTACACCCGAGGAGAAGATGGCTGCTATAAACTGACTG  
GTGCCATCATGCACCACGGCAACATGAAATTCAAACAGAAGCAGCGTGAG  
GAGCAGGCGGAACCTGATGGGACGGAGGCAGCTGATAAATCAGCTTACCT  
GATGGGGCTGAACTCTGCTGACCTTATCAAAGGCCGTGCCACCCAGAG  
TCAAGGTAGGCAATGAATACGTCACCAAAGGTCAAAGTGTGGACCAAGTC  
TACTACCCCAACAAGGAGGCCTTCAAATGTGAGGAGTGTGGGAAGCACTA  
CAACACCAAGCTGGGATATAAGCGCCATGTGGCCATGCACTCTGCCACAG  
CAGGGGATCTCACCTGTAAAGTGTGCATGCAGAGCTACGAGAGTACACCT  
GTTCTCCTGGAGCACCTCAAGAGTCACTCTGGGAAATCTTCCGGCGGTGC  
CAAGGAGAAAAAACACCCGTTGACCACCTGTGACCGTCGTTTCTACACAC  
GGAAGGATGTAAGGCGGCACATGGTGGTTACACGGGCCGAAAGGACTTC  
CTGTGCCAGTACTGTGCCAGCGCTTTGGCAGGAAGACCACCTGACACG  
CCACGTGAAAAAGAGCCACTCGCAGGAGCTGCTGAAGATCAAGACGGAGC  
CTCCGGATATGTTAGGCCTTTTAGCTTCTGGATCGCCACCTTGCTCTGTG  
AAGGAGGAGCTCAGCCCCATGATGTGCGGCATGGGTTCCAATAAAGACCC  
CATGATGGGCAAACCGTTCCCCAGTGGGGCCCTTTTCCAATGGGCATGT  
ACAACCCCAACCAT-----CTCCAGGCGATGTCTAATACTGGGGTGGGT  
CACCCA-----CACCCGTCCCTAATGCCAGTTCCTTGTCTGCAGCTAT  
GGGCATGGGTTGTACATGGAATATCTCATCTACGCCCTTTTCTCATTCA  
TGGGATGTTTACAAATTAGCGATGGATCGAATATCGTCAACCTGCTGGCT  
AGTAACTCTCCAGTGTTCATATGCTCTGACCCAGCAGAAATACTTCAAG  
TAACTACAGTCTGTGATTGGGTTTACATTTACGAGCCCATCGAGTACT  
GGAATCCACAGTGCAGGAGCACCTGAAGACTCTGAGTCATGGCTTCAAC  
AAGATCTCCTGGATGGACAACCTTTTCCACTACCTGCGGGTGGTGAATGT  
GAGTGGCTCAACCAAGAGTGACTTCATTACCATCCTTAAAGGCTCCTTCC  
TTCGCAGCCCGGAGTACCAGCACTTCACTGAGGACATCATATTCTCCAAG  
A---ACCGTGAGACGG-----ACGAGTACGATATATTGCCTCACGGAT  
GTACTTGGTGGCACGAACAACCTGAGAAGAAGCGCGAGGAGGTGGTGGAA  
TTCTGGAAAAGCTTCGTCCGTTGATGCTAATCAATAGCATCAAGTTCATT  
GCCTTCAATCCTACGTTTGTGTTTCATGGACCGCTACAGCTCCTCCGTCAT  
CTCGCCATCCTGACCTCAGGCTTCAGCGTACTCACTATTCTCATCCTCA  
CTTTCTTCTTGGTCATCAACCCCTTAGGAACTTCTGGCTCATCCTCACA



-----  
-----  
-----  
-----  
-----  
-----  
-----  
-----  
-----  
-----  
-----

-----NNNNAATCTCGCTTTCACC  
CTGGCGTGGGGACTGGTCCTGGCACGGAGC---GCAGCGTCCCACTCGGC  
AACAGCTTGCTATCCCCGAGCAAACCGAGGAGCCACTGTTGCCACCCC  
CCCGCAGCGATGGTTTGTCAACC---CTGCCAACAACCGACTGGACTTTG  
CTGCCTCGGCATACGACGCCGCT-----GATTTCCGCCGGTAACGCG  
GCCACCTTGCTGTCTACGCAGCGGCCGGAGTAAAGGCTC-----TTCC  
CCTGCCGACTGCAGGCTGCTCCAACCGGCCTCTTGGCTATTACGCAGACC  
CGTCAG---GCTGG---GGAGGACGCACGCCGCCGAGTACTGTGGTGTA  
AATAGCAAATCCAGCTCGGTCTTTTCCTGTTGGCCCGCTAACTCTATCGG  
TGGCAGAGCGGCCA---CC---AACTACCTGG-----CCGAGGA--  
-GGGA---GACTC---CATCCCGACGGAGAGATCACCT---AT---CGGC  
GGCTCGGAGGAG---ACCAAACCCAAAGACATGAC---ATCTGA---GTC  
GAGCTGGATAGAG---ACGCCGTCTCTATTAAGTCCATTGATTCAAGCG  
ATTCTGGTATTTTTG---AACAGGCCAAAAGGAGAAGAATCTCACCTTCT  
GCCACGCCG-----GTTTCAGAGACAGTGTCCCGTTAAAATCTGA  
GNNNNNNNNNNNNNNNNNNNNNNNNNNNNNNNNNNNNNNNNNNNNNGATAAATCCGTTTCGCGGATGGGATG  
GGCGCCTTCAAATAAACCACAG  
CTCCCACGATATTGGCTCCGG---ACAGACGGCGTTTTCTCTCAGGCG--  
--CCCGGCTAC---GCAGCAGCCGCCCTGGGG---CACCATCA-----C  
CACCCGACCCATGTTGGCTCT---TATTCCACGGCGGCTTTCAACTCCAC  
CAGGGACTTTCTCTTTCAGAAATCGGGGTTTTCGGGGACGCCACCGG-----  
-----GGCGCAGCACAGTTTGTTCGCCTC-----TGGAAGTTT-  
--C-----GCAGGGCCACATGGACACTCAGATGCAGCGGGGCACCTGCT  
CTTCCCAGGGCTCCACGAG---CAAGCGGCGAGCCATGCCTCTTCCAACG  
TGGTCAACAGCCAGATGCGGCTGGGCTTCTCGGGGACATGTACGGACGG  
GCCGACCAGTATGGCCACGTTACAAGCCACGGT---CCGACCACTATGC  
TTCGACCCAGCTGCACGGCTATGGCCCCATGAACATGAATATGGCCGCA-  
--CACCACGGAGCAGGGGCCCTTCTTTCGATACATGAGGCAGCCGATCAAA  
CAAGAGCTCATCTGCAAGTGGATCGAGCCGGAGCAGCTGACAAATCCTAA  
AAAGTCGTGCAACAAAACCTTTTAGCACGATGCACGAGCTTGTGACCCATC  
TGACGGTGGAGCATGTGGGGGGACCAGAGCAGACCAACCATATCTGCTTC  
TGGGAGGACTGCTCCAGAGAAGGAAAGCCTTTCAAAGCCAAATACAAACT  
TGTAATCATATCAGAGTACACACCCGGAGAAAAGCCCTTTCCGTGTCCGT  
TCCCCGGCTGTGGCAA

>Trachinotus carolinus  
AGCCTACTTATCCGAGCGGAGCTTAGTCAACCTGGCGCCCTCCTAGGAGA  
TGACCAAATTTACAATGTAATCGTTACAGCTCATGCCTTCGTAATGATTT  
TCTTTATAGTAATGCCAATTATGATTGGAGGCTTTGGAACTGACTTATC  
CCACTAATGATTGGAGCCCCTGATATAGCATTCCCTCGAATAAATAACAT  
GAGCTTCTGACTTCTCCCTCCCTCTTTCCTTCTTCTTCTCGCCTCCTCTG  
GGGTAGAAGCAGGTGCCGGAACCGGTTGAACAGTCTACCCTCCCTTAGCT  
GGTAATCTTGCCCATGCAGGAGCATCTGTTGATTTAACCATTTTCTCTCT  
TCATTTAGCTGGTATTTTCATCAATTCAGGGGCTATTAACCTTCATCACA  
CAGTAATTAACATAAAACCTCATGCTGTCTCTATATATCAAATCCCCTA

TTTGTCTGAGCCGTTCTAATCACAGCTGTCCTCCTGCTCCTCTCACTTCC  
CGTTTTAGCTGCCGGCATTACTATGCTTCTAACCGACCGAAACCTAAACA  
CTGCCTTCTTTGACCCAGCTGGGGTGGGGACCCAATCCTATAACCAACAC  
CTT-----  
-----  
-----

-----TTCCTAGAGAGAAACCTTCACCCCTCTAACTGTCCTGG  
CATGCTGCTGCTGCTGACGCCACCAGTGTACCAAGCTGTCAGAGCTCT  
CCTGGGGCATGTGCCCTCAGCAACTTCCCTGCTATTTGCAAGACAGAGGAC  
TTCTCCAACCTGCCCAAAGATATGGTGGTCCAGCTTTTATCACACGAGGA  
GCTAGAGACAGAAGATGAGAGACTGGTTTATGAAGCTGCCCTTAACTGGA  
TCAACTATGACCTGGAGAGGAGGCACTGCCACCTCCCAGAGCTTCTGAGA  
ACGGTCCGCCTCGCCCTGCTGCCTGCCATCTTTCTGATGGAGAATGTCTC  
GACAGAAGAGCTAATCAACGCCAGGCCAAGAGCAAGGAGCTGGTGGATG  
AAGCCATCCGCTGTAAGCTGAAAAATCCTGCAGAATGATGGTGTGCTTAAAC  
AGCCCATGTGCTCGACCAAGAAAAACCAGCCATGCCCTGTTTTCTTCTGGG  
AGGGCAGACTTTCATGTGTGACAAGTTGTACCTGGTAGACCAGAAGGCCA  
AAGAGATCATCCCCAAGGCTGACATCCCCAGCCCCAGGAAGGAGTTCAGC  
GCCTGCGCCATCGGCTGTAAGGTGTACATCACTGGTGGGA--GAGGCTC-  
AGAAAAATGGTGTGTCTAAAGATGTATGGGTCTACGATACCGTCCATGAGG  
AATGGTCCAAAGCAGCGCCCATGCTCATCGCCAGGTTTCGGCCATGGCTCT  
GCGGAGCTGAAACACTGCCTCTACGTGGTAGGAGGTCACACGGCAGCCAC  
TGGCTGCCTCCCGCTCTCCATCNNGACAATTACATTTGTTGTGTTTCACTCG  
GTCAACGACAAGGCTGATACTCAATGAAGCGGAGCTAATCATGGCGCTGG  
CCCAGGAGTTCCAGATGAGAGTGGTCACGGTGTCCCTGGAGGAGCAGTCT  
TTCCCCAGTATCATCCAGGTGATCAGCAGCGCCTCCATGTTAGTCAGCAT  
GCACGGAGCCCAGCTAATCACCTCGCTCTTCCCTCCCCAGAGGAGYTGCTG  
TGATGGAAGTGTTCCTTTTGTGTGAACCCAGAGCAGTACACCCCATAT  
AAAACCTGGCCTCCCTTCCAGGCATGGACCTTCACTATATATCCTGGAG  
GAACACTAAGGAGGAAAACACCATCACCCATCCAGACAGACCCTGGGAAC  
AAGGAGGCATTGTTCACTTGGAGAAGGAGGAGCAGGAGCGAATACTGGCA  
AGTAAGGACGTCCCCAGGCACCTGTGCTGCCGCAACCCGGAATGGCTCTT  
CCGGATCTACCAGGACACTTTGGTGGACATCCCTTCCTTCCCTGGAAGTCC  
TCAA---AGAGGGCATTA---ACCAAGCCCAGCTTTAAGAA---GTCA  
AAGCCAGCCAGCACGGTCCATCCAGGCCGAGTCAGAGAACCTCAGTGTCA  
GACCTCAGTACAAACCTAACGAGGCCAACTCACAGTCTCCTGGCAGA  
TCCCGTGGAACTCTGAAATACCTGAAGGTAAGAGAGGTGAAGTATGAGGTG  
TGGATCCAGAAAAAGACACTAGCAAGGGGACACTGGAGGATCAAATCAT  
CCAGGCAAACCCTGCACTAGAGGCCTTCGGCAATGCCAAAACCTCTGAGAA  
ATGACAACCTCATCTCGTTTTGGAAAATTCATTTCGAATCCACTTCGGTCCA  
AGTGGCAAACCTGTCTGCTGACATCGAGACGTATCTGCTGGAGAAGTC  
ACGTGTCACCTTTCAGCTCAAGGCCGAGAGGAACTACCACATCTTCTACC  
AGATCCTGTCCAATCAGAAGCCAGAGCTGCTGGACATGCTGCTGATCACA  
AACAACCCGTACGATTACTCCTACATCTCACAGGGAGAGGTAACCGTTGC  
CTCCATCAATGATTACAGAGGAGCTGATGGCCACCGACAGTGCCTTTGATG  
TGCTTGGCTTCACTCCAGAGGAGAAGATGGGTGTCTATAAACTGACCGGT  
GCCATCATGCACTATGGCAACATGAAGTTCAAAACAGAAGCAGCGCGAGGA  
GCAGGCTGAACCTGATGGGACTGAGGCTGCTGATAAATCAGCTTACCTGA  
TGGGGCTGAACCTCCGCTGACCTCATCAAAGGCCTGTGCCACCCCAGAGTC  
AAGGTAGGAAATGAATATGTACCAAAGGCCAAAAGTGTGACCAAGTCTA  
CTACCCCAACAAGGAGGCCTTCAAGTGTGAGGAGTGTGGGAAGCACTACA  
ACACCAAGCTGGGATATAAGCGCCATGTGGCCATGCACTCTGCCACGGCA



GGTGATCTCACCTGTAAAGTCTGCATGCAGAGCTACGAGAGCACGCCTAT  
TCTCCTGGAGCACCTCAAGAGCCACTCCGGGAAGTCTTCTGGTGGCACCA  
AGGAGAAGAAGCACCCGTGCGACCCTGCGACCCGCTTTCTACACACGG  
AAGGATGTGAGACGGCACATGGTGGTCCACACAGGCCGCAAGGACTTCCT  
ATGCCAGTACTGTGCCAGCGTTTTGGCAGGAAGGACCACCTGACGCGCC  
ACGTGAAGAAGAGCCACTCNCAGGAGCTGCTGAAGATCAAGACGGAGCCTC  
CGGACATGTTAGGGCTTTTAGCCTCCGGGTACCGCCCTGCGCTGTGAAG  
GAGGAGCTCAGCCCCATGATGTGCAGCATGGGTCCTAACAAAGACCCCAT  
GATGGGCAAACCGTTCGCCAGTGGGGCCCCTTTTCCAATGGGGATGTACA  
ACCCCCACCAT-----CTCCAGGCGATGTCTAATACGGGGGTGGGTAC  
CCA-----CACCCGTCCCTAATGCCAGCTCCTTGTCTGCAGCTATGGG  
CATGGGCTGTACATGGAGTATCTCATCTATGCCTCTTTCTCATTCATGG  
GATGTTTACAAATCAGTGATGGATCGAATATCGTCAACCTGCTGGCTAGT  
AACTCTCCGAGTGTTCGTATGCTCTGACCCAGCAGAAGTACTTTAGTAA  
TTACAGTCTGTGATTGGGTTTTACATTTATGAGCCATTGAGTACTGGA  
ACTCCACGGTGCAGGAGCACCTGAAGACCTTGAGTCATGGCTTCAACAAG  
ATCTCCTGGATGGACAACTTTTTCCACTACCTGCGGGTGGTCAATGTGAG  
TGCATCAACTAAGAGCGACTTCATCACCATCCTTAAAGGCTCCTTCCTGC  
GCAGCCCGGAGTATCAGCACTTCACTGAGGACATCATATTCTCCAAGA--  
-ACCGTCAAACCG-----ACGAGTATGATATCATTGCCTCACGGATGTA  
CTTGGTGGCGCGGACGACTGAAAAGAAACGCGAGGAGGTGGTGGAGCTTC  
TGGAAAAGCTTCGTCCGTTGATGCTAATCAACAGCATCAAGTTCATTGCC  
TTCAATCCCACGTTTGTGTTTATGGACCGCTACAGCTCCTCCGTCATCTC  
GCCCATCCTGACCTCAGGCTTACGCGTGTCTACTATCCTCATCCTCACTT  
TCTTCTGGTTCATCAACCCCTTGGGGAACCTTCTGGCTCATTCTCACGGTC  
ACATCCGTGGAGTTGGGCGTTCTGGGTTTTGATGGGCTTTTACCAGTTTGA  
ATGGCAGCCAGCTCTCAAGAATGTGTCAACATCTTGCAATGTTGGCATT  
TTAATGGGCTCGCTGGATGGGCTTCTTTCAGTGGATGACGCCCCAGCTGAC  
ACCATCACTCGGCGATTTTCGCTATGATGTGGCACTGGTGTGAGCATTA  
GGATCTGGAGGAGGACATCATGGAAGGGCTGAGAGAGGGTGGGATGGAAG  
ACAGTCTTGTACCTCAGGCTTTACTGTTCATGATCAAGGAATGTTGTGAT  
GGCATGGGTGATGTCAGCGAGAAGCACGGTGGAGGACCAGCTGTTCTGGA  
GAAGGCTGTACGTTTCTCTTTTCACTGTTATGTCTGTCTCTGTCTGCGCAG  
ACGATAAGGAG-----GAGGAGGTT  
ACCATCTTACCAGAACCAAGGCCAAACTCAGAAGTGTCTGTAAACCCCT  
TTGCTTGATGTTTGTGGATGAGTCAAGACCATGAGACACTCACAGCTCTCC  
TGGGGCCTTTAGTTGCAGAGCGTAACGCAATGAAAGAGAGTAGGCTCATT  
CTGACCATAGGTGGCCTGCCTCGCTCCTTCCGCTTCCACTTACAGAGGCAC  
GGGATACGATGAGAAGATGGTGGGAGAGATGGAAGGTCTGGAGTCTCAG  
GGTCCACATATGTCTGCACTCTGTGTGACTCGAGTCCGGCAGAGGCCTCT  
CAAAACATGGTGTACTCACTCAGTACCCGCTGTCTATGAAGAGAACCCTAGA  
TCGTTATGAAATATGGAGAACCAACCCCTTCTCTGAATCTGTAGACGAAC  
TGCGAGACAGAGTCAAAGGGTCTCTGCAAAGCCCTTCATGGAGACCCAG  
CCCACGATAGATGCATTACTGTGACATTGGCAATGCCACTGAGTTCTA  
CAAAATCTTCCAGGATGAGATTGGGGAAGTGTATCAGAAGGT---CAAC-  
--CCCAGCCGGGAGGAAAGGCGCAGCTGGAGGGCAGCCTTAGACAAACAG  
CTAAGGAAGAAGATGAAGCTTAAACCGGTAATGAGGATGAATGGGAAC  
CGCCCGCAGGCTAATGACCCTGGAGACTGTGGAGGTGGTGTGTGAACTGG  
TGCCCTCAGAGGAGAGGAGGGAGGCCCTGAGGGAGCTCATGAGGCTCTAC  
CTCCAGATGAGACCTGTGTGGCGTGCACCTGCCAGCCAAGGAATGCC  
AGACCAGCTGTGCCGCTACAGCTTTAACTCCCAGCATTTTGCTGACCTCC  
TCTCCTCTACCTTCAAATATAGGTACAATGGAAAAGATAACCAATTACCTT  
CACAAGACTCTGGCCCATGTGCCTGAAATCATAGAGAGGGATGGATCCAT

TGGAGCCTGGGCCAGTGAGGGGAATGAGTCAGCAAACAAGTCATACACCA  
TTGAGATGGGTCCCTTGGGGCCCGGGTGAAGGAGAACCCACAGCCTTTC  
TCCTGCTCCATTGAAGACCCAACAAAACAGACAAAAGTTCAAGGGAATCAA  
AACCTACATTTTCGTACCGGGTCACGCCGAGCCACACAGGGCGTCTGTCT  
ACAGGCGTTACAAACACTTTGACTGGCTGTACAACCGCTTACTGCACAAG  
TTCACTGTGATCTCTGTGCCTCACCTGCCTGAGAAGCAGGCCACGGGGCG  
ATTTGAGGAAGACTTCATCGAGAAGCGTAAGAGACGACTGATACTGTGGA  
TGAACCACATGACCAGTCACCCAGTCCCTCTCCCAGTACGAAGGCTTTGAG  
CACTTTCTGATGTGTGCTGACGACAAGCAGTGGAAACTGGGAAAGAGACG  
GGCGGAGAAGGACGAAATGGTGGGCGCCATTTTCATGCTGACACTCCAGA  
TCCCTAACGAGCACCAGGACCTTCCAGGATGTGGAGGAGCGGGTCCGACTCC  
TTCAAGGCCTTTTGCCAAAAAATGGACGACAGCGTGATGCAGCTCACACA  
TGTTGCCCTCAGAGCTGGTGCCTAAACACCTGGGCGGGTTCCAGGAAGGAGT  
TCCAGCGGCTGGGAAATGCCTTCCAGTCTATCAGCCAGGCATTCATGCTG  
GACCTCCCCACAGCTCAGATACCTCAACAACGCCATCTCCCATNNNNNNNNNCAGT  
TCCTCAAACCTGACCTCTCTGGGTTTCATCATTGGAGTCGGTGTGGTTGGG  
AACCTCCTGATCTCCATCCTGCTGGTCAAAGACAAGAGCCTGCACCGAGC  
GCCCTACTATTTTCTGCTGGACCTGTGCGCCTCTGATATCCTGCGCTCCG  
CCATCTGCTTCCCCCTTTGTCTTACCTCAGTCAAGAATGGATCTGCCTGG  
ACCTACGGCAGCTGACCTGCAAAGTGATTGCCTTCCCTGGGTGTGCTCTC  
TTGTTTCCACACAGCATTCATGCTGTTCTGTGTCAGTGTTACTCGCTACC  
TGGCCATCGCACATCACCGTTTCTACACTAAGAGGCTGACCTTCTGGACC  
TGCTGGCTGTCTGTCATGCTGGTGTGGACGTTGTCAGTGGCTATGGCGTT  
CCCGCCGGTGTCTCGATGTAGGGACGTACTCTTTTATCCGGGAGGAGGACC  
AGTGCACATTCCAGCACCATTCCTTCCAGGGCAAATGATTCCGCTGGGCTTC  
ATGCTTCTGCTGGCGCTCATCCTCCTGGCCACACAGCTGGTTTACCTCAA  
GCTCATCTTTTTTGTCCACGACCGTCGAAAGATGAAGCCTGTCCAGTTCCG  
TGCTGCTGTGAGCCAGAAGTGGACCTTCCATGGGCCAGGAGCCAGTGGG  
CAGGCGGCAGCCAAGTGGCTGGCTGGATTTGGTCGAGGCCCAACCCCGCC  
TACTTTGCTGGGCATCCGGCAGAACAGCAACGCAGCGGGCCGAGGCGTC  
TACTGGTATTGGATGAATTCAAGACAGAGAAGAGGATTAGTAGGATGTTT  
TACATCATGACGTTTTTCTTCTGCACTGTGGGGGCCCTATCTGGTAGC  
CTGCTACTGGCGGGTGTGTTGCAAGGGGCCCGTAGTCCCTGGGGGCTACC  
TGACGGCAGCCGTGTGGATGAGCTTTGCCAGGCTGGGGTCAATCCTTTC  
ATCTGCATCTTCTCCAANNNNNNNGCCAAATCTCGCTTTCACCCCTGGCGTGGGGACT  
GGTCTGGCACGGAGC---GCAGCGTCCCCTCGGCAACAGCTTGTATC  
CCCGCAGCAAACCGAGGAGCCACTGTTGCCACCCCGCAGCGATGGT  
TTGTCACCC---CTGCCAACAACCGACTGGACTTTGCTGCCACGGCATA  
GACGCCGCC-----GATTTCCGCGGTAACGCGGCCACCTTGTGTC  
CTACGCAGCGGCCGGAGTGAAGGCTC-----TTCCCCTGCCGACTGCAG  
GCTGCTCCAACCGGCTCTTTGGCTATTACGCAGACCCGTCG---GCTGG  
---GGAGGACGCACGCCCGCAGTACTGCGGCGTAAATAGCAAATCCAG  
CTCGGTCTTTTCTGCTGGCC---TAACTCGATCGGTGGCAGAGCGGGCA  
---CC---AACTACCTGG-----CCGAGGA---GGG---GACTC-  
--CATAACCACAGAGAGATCACCG---AT---CGGCGGCTCGGAGGAG--  
-GCCAAACCCAAAGACATGAC---ATCCGA---GTCGAGCTGGATAGAG-  
--ACGCCGCTCCTCCATTAAGTCCATTGATTCCGAGCGATTCTGGTATCTTT  
G---AACAGGCCAAAAGGAGGAGAAATCTCACCGTCTGCCACGCCA-----  
----GTTTCAGAGACAGTGTCCCCGTTAAATCTGAGCATCACTCAACAG  
GCGAAGTCACAGAGAGAGAAGTGGCGTTGGGGATAAATCCGTTCCGCGGAT  
GGGATGGGCGCCTTCAAATAAACACAGCTCCCACGATATTGGCTCCGG  
---ACAGACGGCGTTTTCTCCAGGCG---CCCGGCTAC---GCAGCAG  
CCGCCCTGGGA---CACCATCA-----CCACCCGACCCACGTTGGCTCT





CAAAGACCTGGAGGAGGACATTGTGGAGGGGCTGAGTAAGTACGGGCTCG  
AAGACAGCGCCTGCACCTCGGGTTTCAGTGTTATGATCAAGGAGTCTTGC  
GATGGCATGGGCGATGTCAGTGAGAAGCACGGCGGAGGCCCGCCATCCC  
GGAGAAAGCTGTGCGCTTTTTCCTTCACCATCATGTCCATCTCTGTACTGG  
CTGACGCAGAGCAG-----GAGGAA  
GTGACTATCTTCAGGGAGCYAAAGCCAAATTCTGAACTGTCCTGTAAACC  
TCTATGCTTGATATTCGTAGACGAGTCTGACCACGAGACCCTCACGGCCA  
TCCTAGGGCCTGTGGTCACGGAGCGGAACGCCATGAAGCAGAGCCGACTC  
ATCCTGTCCATGGGTGGGCTGCCTCGCTCCTTCCGCTTCCGCTTCCGAGG  
CACAGGCTTGGATGAGAAGATGGTGCCTGAGATGGAAGGCCTGGAGGCCT  
CGGGCTCCACCTACATCTGCACCTGTGTGACTCCACGAGGATGGAGGCC  
TCTCAGAACATGGTGCTCCATTCCATCACGCGCAGCCACAGCGAGAACCT  
GGAGCGCTATGAGATATGGAGGAGCAATCCCTTCTCCGAGTCTGCCGAGG  
AGCTGCGAGACCGGGTCAAAGGAGTCTCGGCCAAGGCCTTCATGGAGACC  
CAACCAACTCTGGATGCATTGCACTGTGACATCGGCAACGCCACCGAGTT  
CTACAAAATCTTCCAGGACGAGATCGGAGAAGTGTTCAAGAGGCC---CA  
AC---CCTACGCGGGAGGAGAGGCGAGGATGGAGAGCGGTCCTGGATAAG  
CAGCTTAGGAAGAAGATGAAACTCAAGCCCGTGATGAGGATGAACGGAAA  
CTATGCCAGGAGGCTGATGACCAAGGAGGCCGTGGATGTGGTGTGTGAGC  
TGGTGGCCACAGCAGAGAGAAAGGAGGCCCTGAGGGAGCTCATGGAGCTC  
TACCTGCAGATGAAACCTGTATGGCGGGCTACCTACCCTGCCAACGAATG  
CCCTGATGAGCTGTGCCAGTACAGCTTCAACTCTCAGCGCTTTGCTGATC  
TCCTATCCACTGCCTTTAAATACAGATATAATGGAAAGATCACCAATTAC  
CTACACAAGACTCTGGCCACGTGCCCTGAAATTATCGAGAGAGATGGCTC  
CATCGGAGCCTGGGCCAGCGAGGGCAACGAGTCAGCGAACAAATCCTACG  
CCATAGAGATGAGTCCCAAGGGGCCCTGTGGAAGGACAGCCCCAGCCC  
TTCTCCTGCTCCATCGAGGACCCACCAAGCAGACCAAGTTCAAGGGCAT  
CAAGACGTACATATCCTACC CGCTCACGCCGAGCCACACGGGGCGGCCG  
TCTACAGACGCTACAAACACTTTGACTGGCTCTACAACCGCCTGCTGCAC  
AAGTTCACCGTTCATCTCTGTGCCCCACCTGCCGGAGAAGCAGGCCACAGG  
CCGCTTTGAGGAGGACTTCATCGAGAAGCGAAAGCGACGSCTGATCCTGT  
GGATGAACCACATGACCAGTCAACCAGTCCCTCTCCAGTATGAGGGCTTC  
GAGCACTTCCCTGATGTGCGCCGATGACAAGCAGTGAAGCTGGGCAAGCG  
GCGGGCAGAGAAGGACGAGATGGTGGGCGCACACTTCATGCTGACCTTCC  
AGATCCCCAAYGAGCACCAGGACCTGCAGGACGTGGAGGAGCGGATCGAC  
TCCTTCAAATCCTTTGCCAAGAAAATGGATGACAGCGTGTTCAGCTGAC  
GCATGTGGCCTCAGAGCTGGTGCAGGACCTGGGGGGTTCCGGAAGG  
AGTTCCAGCGGCTGGGGAATGCCTTCCAGTCCATCAGCCAGGCCTTCATG  
CTGGACCCTCCCCACAGCTCGGAAAAGCTCAATAATGCCATCTCCCACNNNNNNNNNGT  
TCCTCAAACCTGACCTCTCTGGGATTCATCATTGGAGTTGGCGTGGTTGGA  
AACCTCCTGATCTCCATCCTGCTGGTCAAAGACAAGAGCTTGCACCGYGC  
RCCCTACTACTTCCCTGCTGGACCTGTGTGCCTCCGACATCCTGCGCTCAG  
CCATCTGTTTCCCCTTYGTCTTCACTCCGTCAAGAATGGATCCACCTGG  
ACCTACGGCACCCCTTACGTGCAAAGTGATCGCCTTCCCTGGGCGTGCCTC  
CTGCTTCCACACGGCGTTCATGCTGTTCTGTGTGTCAGTGTCACTCGCTACC  
TGGCCATCGCGCATCACCGCTTCTACACAAAGAGGCTCACCTTCTGGACT  
TGCTTGGCTGTGATGTCATGGTGTGGACGTTGTCAGTAGCCATGGCCTT  
CCCCCAGTGCTGGACGTAGGGACGTATTACTTTCATCCGAGAGGAGGACC  
AGTGCAGGTTCCAGCACCGCTCCTTCAGGGCTAACGACTCGCTGGGCTTC  
ATGCTCCTGCTGGCGCTCATCCTCCTCGCCACACAGCTGGTTTACCTCAA  
GCTCATCTTCTTYGTTACGACCGCCGGAAGATGAAACCCGTCCAGTTTG  
TGCCGGCTGTGAGCCAGAACTGGACCTTCCATGGACCRGGTGCCAGCGGG  
CAGGCGGCAGCAAACCTGGTTGGCCGATTTGGGAGAGGCCCCACCCACC



-----  
-----NNNNNNNNNNNAACCTTCACCCATCTAATTGCCTTGGCATGCTGTTGCT  
GTCTGACGCCACCAGTGCACCAAGCTGTCAGAGCTCTCCTGGGCATGT  
GCCTCAGCAACTTTCCCGCTATTTGCAAGACAGAGGACTTCTCCAAGT  
CCCAAAGATATGGTGGTGCAGCTTTTGTGCATGAGGAGCTAGAGACTGA  
AGATGAGAGACTGGTTTATGAAGCTGCCCTCAACTGGATCAACTATGACC  
TGGAAAAGAGGCCTGCCACCTTCCAGAGCTCCTGAGAACAGTCCGTCTA  
GCCCTTCTGCCTGCCATCTTTCTCATGGAGAATGTTTCTACAGAAGAGCT  
CATCAACGCCAGGCCAAGAGCAAGGAGCTGGTGGATGAAGCTATCCGCT  
GTAAGCTGAAGATCTGCAGAATGATGGTGTGTTAACAGCCCATGTGCT  
CGACCAAGAAAGACCAGCCATGCCCTCTTTCTTCTGGGCGGGCAGACTTT  
CATGTGTGACAAGTTGTACCTGGTGGACCAGAAAGCCAAAGAGATCATCC  
CCAAGGCTGACATTTCCAGCCCCAGGAAGGAGTTCAGCGCCTGCGCCATT  
GGCTGCAAGGTGTACATCACTGGTGGGA--GAGGCTC-AGAGAATGGTGT  
GTCCAAAGATGTATGGGTCTACGACACCGTCCACGAGGAATGGTCGAAGG  
CAGCACCCATGCTCATTGCCAGGTTTGGCCATGGCTCTGCAGAGCTGAAA  
CACTGCCTCTACGTGGTAGGANNNNNNNNNNNNNNNNNNNNNNNNNNNNNNNNNNNNNNNNNNNNNNNNNNNNNNNNNGGATGAA  
TACATTGTTGTGTTTCAGTCGTT  
CAACAACGAGGCTGATACTGAATGAAGCAGAGCTAATTATGGCACTGGCC  
CAGGAGTTCCAGATGAGAGTGGTTACGGTATCCCTGGAGGAACAGTCTTT  
CCCCAGTATCGTCCAGGTGATCAGCAGTGTACCATATTAGTCAGTATGC  
ATGGTGCTCAGTTTATCACCTCACTCTTCCCTCCCAGAGGAGCTGCTGTG  
GTTGAACTGTTCCCTTTTGTGTGAACCCAGAGCAATACACCCCATATAA  
AACCTTACCTCCCTTCCAGGTATGGACCTTCACTATATCTCCTGGAGGA  
ACACTAAGGAGGAGAACCACATCACCCACCCAGACAGACCCTGGGAACAA  
GGGGGCATTGCTCACTTGGAGAAGGAGGAGCAAGAGAGAATACTGGCGAG  
CAAAGATGTCCCAGGCACCTGTGCTGCCGCAACCAGAGTGGCTTTTCC  
GGATCTACCAGGACACTTTGGTGGACATCACTTCTTCCCTGGAAGTACTC  
AA---AGAGGGCTTGAAG---ACAAAGCCAGTTTGAAGAA---GTCAA  
GCCAGCCAGTACACTMCACCCGGGCCGGGTGAGAGAACCTCAGTGTGAGA  
CCTCAGTACAAACCAGTAATGAGGCTAAACTCACAGTCTCCTGGCAGATC  
CCATGGAATCTGAAATATCTGAAGTTAGAGAGGTGAAATATGAGGTATG  
GATCCAGAAAAAAGACACCAGCAAGGGGACACTGGAGGATCAAATCATCC  
AGGCGAACCTGCACTGGAGGCCTTCGGCAACGCCAAAACATTGAGAAAT  
GACAACTCGTCTCGTTTTGGAAAATTCATCCGAATTCACTTTGGTACAAG  
CGGCAAGCTGTCTATCTGCTGACATCGAGACGTACCTGCTGGAGAAGTAC  
GTGTCACCTTTCAGCTCAAGGCTGAGAGAAATTACCACATCTTCTACCAG  
ATCCTGTCCAATCAGAAGCCAGAGCTACTGGACATGCTGCTGATCACCAA  
CAACCCGTACGACTACTCCTACATCTCCAAGGAGAGGTAACGGTTGCCT  
CCATCAACGACTCGGAGGAGCTGATGGCCACGGACAGCGCCTTCGATGTG  
CTCGGCTTCACTCCAGATGAGAAAAATGGGCGTCTATAAACTGACGGGCGC  
CATCATGCACTATGGCAACATGAAGTTCAAACAGAAGCAGCGTGAAGAGC  
AGGCCGAGCCAGATGGGACGGAGGCTGCTGATAAAATCGGCTTACCTAATG  
GGGCTGAACTCTGCTGACCTGATCAAAGGGCTCTGCCACCCAGAGTCAA  
GGTAGGAAATGAATATGTACCAAAGGCCAAAGTGTGGACCAAGTCTACT  
ATCCTAACAAAGGAGGCCCTTCAAGTGTGAGGAATGTGGGAAGCACTACAAC  
ACCAAGCTGGGATATAAGCGTCATGTGGCAATGCACTCTGCCACGGCAGG  
TGATCTCACCTGTAAAGTGTGCATGCAGACCTACGAGAGCACGCCCCTAC  
TCTTGGAGCACCTCAAGAGCCACTCCGGGAAGTCTCAGGTGGCACCAG  
GAGAAAAAACACCCGTGCGACCACTGTGACCGTCTGTTTCTACACACGGAA  
GGATGTTAGACGTACATGGTGGTCCACACAGGCCGAAAGGACTTCCTGT  
GCCAGTACTGTGCCAACGNTTTGGCAGGAAGGACCATCTGACACGGCATG  
TGAAGAAGAGCCACTCGCAGGAGCTGCTGAAAAATCAAGACAGAGCCTCCT

GATATGTTAGGTCTTTTAGCTTCCGGCTCACCACCTTGCTCTGTGAAGGA  
GGAGCTCAGCCCCATGATGTGCGGCATGGGTCCCAACAAAGACCCCATGA  
TGGGCAAACCGTTCCCCAGTGGAGCCTTTTTCCGATGGGCATGTACAAC  
CCCCACCAT-----CTCCAGGCCATGTCTAATTCTGGGGTGGGTCACCC  
A-----CACCCGTCCCTGATGCCACTTCCTTGTCTGCAGCTATGGGCA  
TGGGCTGTCACATGGAATATCTCATCTACGCATCTTTCTCGTTCATGGGA  
TGTTTACAAATCAGTGATGGATCAAATATTGTGAACCTGTTGGCTAGTAA  
CTCTCCAAGTGTTTCATATGCTGTGACCCAGCAAAAATACTTCAGTAACT  
ATAGTCCTGTGATTGGGTTTTACATTTATGAGCCCATCGAGTACTGGAAC  
TCGACGGTGCAGGAGCACCTGAAGACTCTGAGTCATGGCTTCAATAAGAT  
CTCTGGATGGACAACTTTTTCCACTACCTGAGGGTGGTGAATGTGAGTG  
CGTCAACCAAGAGTGACTTCATCACCATCCTCAAGGGCTCCTTCTGCGC  
AGCCCGGAGTACCAGCACTTCACTGAGGACATCATATTCTCAAAGA---A  
CCGTGAGACTG-----ATGAGTATGATATTATTGCCTCACGGATGTACC  
TGGTGGCAGCKACAACAGAGAAGAAGCGCGAAGAGGTGGTGGAGCTTCTG  
GAAAAGCTTCGTCCATTGATGCTGATCAACAGCATCAAGTTCATTGCCTT  
CAATCCTACATTTGTGTTTCATGGACCGCTACAGTTCCTCTGTTCATCTCGC  
CCATCCTGACCTCAGGATTCAGCGTACTCACAATCCTCATCCTCACTTTC  
TTCTTGTTCATCAACCCCTTGGGTAACTTCTGGCTCATCCTCACTGTAAC  
GTCCGTGGAGCTGGGCGTCTTGGGTTTGGATGNNNNNNNNNNNNNNNNNTGGCAGCCCGCTCTCAAGA  
ATGTGTCTACATCTTGCAATGTTGGAATTATTAATGGGCTCTCTGGATGG  
ACTTCTCAGTGGATGACTCCCCAGCTGACACCATCACTCGGCGGTTTCG  
CTATGATGTGGCACTGGTGTGAGCATTAAGGATCTGGAGGAGGACATTA  
TGAACGGGCTGAGAGAGAATGCGATGGAGGACAGCGTTGCACCTCGGGC  
TTCAGTGTTCATGATCAAAGAATCTTGTGACGGCATGGGCGATATCAGCGA  
GAAGCACGGTGGAGGACCACTTGTTCCTGAGAAGGCTGTACGTTTTTCTT  
TCACTGTGATGTCTGTCTCTATCCTGGCAGACGGTGCAGAG-----  
-----GATGAAGTTACCATCTACACGGAGTCAA  
GCCAACTCAGAGCTGTCTGTAAGCCCTTTGCTGATGTTTGTGGATG  
AGTCAGACCATGAGACACTCACAGCCATCCTGTGGCCCATCATTGCAGAG  
CGTAATGCAATGAAAGAGAGCAGACTCATCCTATCCATCGGTGGACTCCC  
TCGCTCCTTCCGCTTTCACTTCAGAGGCACAGGATACGATGAGAAGATGG  
TGCGTGAGATGGAGGGCCTTGGAGCCTCTGGGTCCACCTACATCTGCACT  
CTTTGTGACTCCAGTCGCACAGAGGCCTCTCAAAACATGGTGTACTACTC  
CATCACTCGCAGTCATGAAGAGAACTTAGAACGTTATGAAATATGGAGAA  
CCAACCCCTTTTCTGAGTCTGCAGATGAGCTGCGAGACAGAGTCAAAGGG  
GTCTCTGCCAAGCCCTTCATGGAAACCCATCCAACGCTGGATGCACTACA  
CTGTGACATAGGCAATGCCACAGAGTTTTACAAAATCTTCCAGGATGAGA  
TCGGGGAGGTGTACCAAAGGT---CAAC---CCCAGCCGGGAGGAGCGC  
CGCGGCTGGAGGGCAGCCCTAGATAAACAGCTGAGGAAGAAGATGAAGCT  
CAAACCGTAATGAGGATGAATGGGAACATATGCCCGCCGGCTAATGACCC  
TAGAGGCTGTGGAGGTGGTGTGTGAGTTGGTGCCTCAGAGGAGAGGAGG  
GAGGCCCTGAGGGAGCTTATAATGCTCTACCTCCAGATGAAACCTGTGTG  
GCGTGCCACCTGCCAGCCAAGGAGTGCCCGACCAGCTGTGCCGCTACA  
GCTTTAACTCTCAGCGCTTTGCCGACCTCCTCTCTCTACCTTCAAATAT  
AGGTACAATGGAAAGATAACCAATTACCTGCACAAGACCCTGGCCCATGT  
GCCTGAAATNNNNNNNNNNNNNNNNNNNNNNNNNNNNNNNNNNNNNNNNNN  
TCTTACACCATCGAGATGGGTCTGTGGGGCCCCGATGGWC  
GGAGAGCCCACAGCCTTTCTCCTGCTCCATTGAAGACCCAACAAAACAGA  
CAAAGTTTAAGGGCATCAAGACGTACATTTTCGTATCGGGTCACGCCGAGC  
CACACMGGGCACCCCTGTCTACAGGCGCTACAAACACTTTGACTGGCTGTA  
CAACCGCTTACTGCACAAGTTCACTGTGATCTCTGTGCCTCACCTGCCTG  
AGAAGCAGGCCACGGGGCGATTTGAGGAAGACTTCATCGAGAAGCGCAAG



AGGCGACTGATACTGTGGATGAACCACATGACCAGTCACCCAGTCCTCTC  
CCAGTATGAAGGCTTTGAGCACTTCTGATGTGTGCTGATGACAAGCAGT  
GGAAATTTGGGCAAGAGACGGGCGGAGAAAGACGAGATGGTGGGTGCGCAT  
TTCATGCTGACCCTCAGATCCCTAACGAGCACCAGGACCTTCAGGATGT  
AGAGGAGCGGATCGACTCCTTCAAGTCCTTTGCTAAGAAAATGGATGACA  
GCGTGATGCAGCTCACACATGTTGCCTCGGAGCTGGTGCCTAAGCACCTG  
GGTGGGTTTCAGGAAGGAGTTCAGCGGCTGGGAAAATGCCTTCCAGTCTAT  
CAGCCAGGCGTTCATGCTGGACCCTCCCCACAGCTCAGAGACCTTAAACA  
GCGCCATCTCCCATNNNNNNNNNNCGTTCCTCAAACCTGACCTCTCTGGGTTTCATCATTG  
GAGTCGGTGTGGTTGGAACCTCCTGATCTCCATCCTGCTGGTCAAAGAC  
AAAAGCCTGCACCGAGCGCCCTACTATTTCCCTGCTGGACCTGTGCGCCTC  
TGACATCCTTCGATCCGCCATCTGCTTCCCCTTTGTCTTACCTCGGTCA  
AGAATGGATCTGCCTGGACGTACGGTACGCTGACCTGCAAAGTGATTGCC  
TTCTGGGTGTGCTCTCCTGTTTCCACACAGCGTTCATGCTGTTCTGTGT  
CAGTGTACGCGCTATCTGGCCATCGCACATCACCGTTTCTACACCAAGA  
GGCTGACCTTCTGGACCTGTCTAGCTGTCTATCTGCATGGTGTGGACGTTG  
TCAGTGGCAATGGCGTTCCCACCAGTGCTAGACGTAGGGACGTA CTCTTT  
TATCCGGGAGGAGGACCAGTGCACGTTCCAGCACCGCTCCTTCAGGGCGA  
ATGATTGCTGGGCTTCATGCTCCTGCTGGCGCTCATCCTCCTGGCCACA  
CAGCTGGTTTACCTCAAGCTCATCTTTTTTCGTCCACGACCGTCGAAAGAT  
GAAGCCCGTCCAGTTCGTGCCTGCTGTTAGCCAGA ACTGGACCTTCCATG  
GGCCAGGCGCCAGCGGGCAGGCAGCCGCAACTGGCTGGCCGGATTCCGGT  
CGAGGCCCCACCCCGCCACTTTGCTGGGCATCCGGCAGAACAGCAACGC  
AGCGGGCCGAGGCGTCTACTGGTATTGGATGAATTCAAACAGAGAAGA  
GGATTAGTAGGATGTTCTACATCATGACATTTTTTCTTCTGCGATTGTGG  
GGCCCTATCTGGTCGCTGCTACTGGCGGGTGTGTTGCAAGGGGCCCTGT  
GGTCCCTGGGGGTACCTGACGGCAGCCGTGTGGATGAGCTTTGCCCAGG  
CTGGGGTCAATCCTTTCATCTGCATCTTCTCCAACAGGGAGGCCAAATCT  
CGCTTTCACCCTGGCATGGGGACTGGTCTTGGCACGGAGC---GCAGCGT  
CCCCTCGGCAACAGCTTGCTATCCCCGCAGCAAACCGAGGAGCCCACTG  
TTGCCACCCCGCAGCGATGGTTTGTACCC---CTGCCAACACCGA  
CTGGACTTTGCTGCCCTCGGCATACGACGCCGCT-----GATTTGCG  
CGGTAACGCGGCCACCTTGCTGTCTTACGCAGCGGCCGGAGTGAAGGCTC  
-----TTCCCCTGCCGACTGCAGGCTGCTCCAACCGGCCCTCTTGTTAT  
TACGCAGACCCGTCAG---GCTGG---GGAGGACGCACGCCCGCCAGTA  
TTGTGGTGTGAACAGCAAACAGCTCGGTCTTTTCTGCTGGCCCTCTA  
ACTCTATCGGAGGCAGAGCGGGCA---CC---AACTACCTGG-----  
-CTGAGGA---GGGA---GACTC---CATGCCGACAGAGAGGTCACCG--  
-AT---CGGCGGCTCCGAGGAG---ACCAAACCTAAAGACATAAC---AT  
CAGA---ATCGAACTGGATAGAG---ACGCCGTCTCCATTAAATCCATA  
GATTCGAGCGATTCTGGAATCTTTG---AACAGGCCAAACGGAGAAGGAT  
CTCACCTTCTGCTACGCCA-----GTTTCAGAGACAGTGTCCCCGT  
TAAAGTNNNNNNNNNNNNNNNNNNNGCGAAGTCTCAGAGAGAGAAGTGGCGTTGGGGATAAATCCGTT  
CGCGGATGGGAGGGGCGCCTTCAAAAATAAACCACAGCTCCCACGATATTG  
GCTCCGG---ACAAACGGCGTTTTCTCTCAGGCG---CCTGGCTACGCA  
GCAGCAGCAGCCCTGGGA---CACCATCA-----CCATCCGACCCACGT  
TGGCTCT---TACTCCACGGCAGCTTTCAACTCCACCAGGGACTTTCTCT  
TCAGAAATCGGGGATTCGGGGACGCCACCGG-----TGCGCAG  
CACAGTTTGTTCGCCCTC-----CGGAAGTTT---C-----GCAGG  
GCCACATGGACACTCAGATGCAGCGGGGCACCTGCTCTTCCCGGGGCTCC  
ACGAG---CAAGCGGCGAGCCACGCGTCTTCCAATGTGGTTAACAGTCAG  
ATGCGCCTGGGCTTTTCGGGGGACATGTATGGACGGGCGGACCAGTACGG  
CCACGTTACAAGCCCGCGGT---CCGACCACTATGCTTCGACCCAGCTGC

ACGGCTACGGCCCCATGAACATGAATATGGCCGCA---CACCACGGAGCA  
GGGGCCTTCTTTTCGATACATGAGGCAGCCGATCAAACAAGAGCTCATCTG  
CAAGTGGATCGAGCCGGAGCAGCTGACAAATCCCAAAAAGTCGTGCAACA  
AAACTTTTAGCACGATGCACGAGCTCGTGACCCATCTGACGGTGGAGCAT  
GTGGGGGGACCGGAGCAGACCAACCACATCTGCTTCTGGGAGGAATGCTC  
CAGAGAAGGAAAGCCATTCAAAGCCAAATACAAACTTGTGAATCATATCA  
GAGTACACACCGGAGAAAAGCCCTTCCCGTGTGCGNNNNNNNNNNNNNNNNNN

>Triacanthus biaculeatus

AGCCTTCTTATTTCGAGCAGAGCTTAGCCAGCCCCGGCGCTCTTCTGGGCGA  
TGATCAGATTTACAATGTAATCGTCACAGCACATGCATTTGTAATAATTT  
TCTTCATGGTCATACCTATCATAATTGGAGGGTTTGGAAACTGACTGATC  
CCACTAATGATTGGGGCCCCCGATATGGCCTTCCCCCGAATAAATAATAT  
GAGTTTTTACTACTTCCCTCCCTCTTCCCTTCTTACTCGCCTCCTCAG  
GCGTAGAAGCGGGGGCCGGAAGTGGCTGAACAGTATATCCACCTTTAGCA  
GGAAACCTGGCACATGCGGGGGCCTCTGTAGATCTGACCATCTTCTCCCT  
GCATTTAGCAGGGGTGTCTCAATTTCTGGGGCTATTAATTTTATTACAA  
CCATCATTAACATGAAACCCCCCGCCATTTTCGCAATATCAAACGCCCCTA  
TTTGTGTGGGCAGTTCTAATCACGGCAGTTCTGCTTCTTCTATCCCTCCC  
AGTTCTGGCCGCGGTATTACAATGCTCCTCACAGACCGAAATCTTAACA  
CAACCTTCTTTGACCCGGCTGGGGGAGGAGATCCTATTCTATATCAACAC  
TTA-----  
-----  
-----  
-----  
-----

-----TTCCTAGAGAGAAACCTCCACCCATCCAACCTGCCTCGG  
CATGCTTTTTGCTGTCCGATGCCACCAGTGCACCAAGCTGTCAGAGCTCT  
CCTGGGGCATGTGCCCTCAGCAACTTCCCGCCATTTGCAAGACAGAGGAC  
TTCCCTCAATTGCCCAAAGATATGGTGGTGCAGCTTTTGTACACGAGGA  
GCTAGAGACTGAAGACGAGAGACTCGTTTATGAAGCTGCCCTCAACTGGA  
TCAACTATGACCTTGAAAAGAGGCACCTGCCACCTTCCCGAGCTCCTAAGA  
ACGGTCCGTCTCGCCCTTCTGCCGGCCATCTTCTCATGGAGAATGTTTC  
TACAGAAGAGCTGATCAATGCCAGGCCAAGAGCAAGGAGCTGGTGGATG  
AAGCCATCCGCTGTAAGCTGAAGATCCTGCAGAATGATGGGGTGGTCAAC  
AGCCCGTGTGCTCGACCAAGGAAAACCAGCCATGCCCTCTTCTCTGGG  
TGGGCAGACTTTCATGTGTGACAAGTTGTACCTCGTGGACCAGAAAGCCA  
AAGAGATCATCCCGAAGGCCGACATCCCCAGCCCCAGGAAGGAGTTCAGC  
GCCTGTGCCATCGGCTGTAAGGTGTACATCACTGGTGGGA--GAGGCTC-  
AGAGAACGGTGTGTCCAAGATGTTGGGTCTACGACACAGTACATGAGG  
AATGGTCAAAGGCGGCACCCATGCTCATTGCCAGGTTTGGTTCATGGCTCT  
GCAGAGCTGAAACACTGCCTCTACGTGGTGGGAGGTCACACTGCAGCAAC  
TGGTTGCCCTCCAGCTTCTCCGTCTGGATGAATACATTGTTGTGTTAGT  
CGCTCAACAACAAGGCTAATTCTGAATGAAGCAGAGCTCATAATGGCGCT  
GGCCAAGAGTTCCAGATGAGAGTAGTTACAGTATCCCTAGAGGAACAGT  
CTTTCCCCAGTATTGTCCAGGTGATCAGCAGTGCCACCATGTTAGTCAGT  
ATGCATGGAGCTCAGCTTATTACTTCACTCTTCCCTCCCCAGAGGAGCCAC  
TGTGGTTGAGCTGTTCCCTTTGCGGTGAACCCAGAGCAATACACCCCAT  
ATAAAACCGTTACCTCCCTTCCAGGTATGGATCTTCACTATATCTCCTGG  
AGAAACACTATGGAGGAGAACACCATCACCCACCCAGATAGACCCCTGGGA  
ACAAGGGGGTATTGCTCATTTGGAGAAGGAGGAGCAAGAGAAAATACTGG  
CAAGCAAGGATGTCCCCAGGCACCTATGTTGCCGCAACCCAGAGTGGCTT  
TTCAGGATCTACCAGGATACTTTGGTTCGACATCCCCCTCCTTCCCTTGAAGT  
CCTCAA---AGAAGGCTTGAAG---ACAAAGCCAGTTTGAAGAA---AT  
CAAAGTCAGCAAGCACACTCCACCCAGGCCGGGTGAGAGAACCCTCAGTGT

CAGACCTCAGTACAAACCAGTAATGAGGCTAAACTCACAGTCTCCTGGCA  
GATCCCATGGAATTTGAAGTACCTAAAGGTCAGAGAAGTGAAATATGAGG  
TATGGATCCAGAAAAAGATACAAGCAAAGGGACCCTGGAAGATCAAATC  
ATCCAGGCGAACCCCTGCCCTGGAGGCCTTTGGCAATGCTAAAACAGTAAG  
AAATGACAATTCATCTCGTTTTGGAAAATTCATTCGAATTCACCTTGGA  
CAAGTGGCAAGTTGTCATCAGCTGACATTGAGACATATCTACTGGAGAAG  
TCACGAGTCACTTTTCAGCTCAAGGCTGAGAGAAAATTACCACATCTTCTA  
CCAGATCCTATCTAATCAGAAACCAGAGCTACTGGACATGCTGCTGATCA  
CCAACAACCCATATGACTACTCCTATATTTCCCAAGGAGAGGTCACCGTT  
GCCTCCATCAATGATTCAGAGGAGCTAATGGCAACAGACAGTGCCTTCGA  
TGTAATTTGGCTTACGCCAGATGAGAAGATGGGTGCTATAAACTGACAG  
GTGCCATCATGCACTATGGCAACATGAAGTTCAAACAGAAGCAGCGTGAG  
GAGCAGGCTGAGCCGGATGGAACAGAGGCTGCTGATAAATCAGCCTACCT  
CATGGGACTGAACTCAGCTGACCTTATCAAAGGGCTGTGCCACCCAGAG  
TCAAAGTTGGAAATGAATATGTCACCAAAGGCCAAAAGTGTGGACCAAGTC  
TACTATCCGAACAAGGAGGCCTTCAAGTGTGAAGAATGTGGGAAGCACTA  
CAACACCAAGCTGGGTATAAGCGTCATGTGGCCATGCACTCTGCCACTG  
CAGGTGACCTCACCTGTAAAGTGTGCATGCAGACCTATGAGAGCACAGCT  
GTTCTCTTAGAGCACCTAAAGAGCCATTCTGGGAAGTCCCTCGGGTGGAA  
CAAGGAAAAGAAAACATCCTTGCATCCTGTGACCGTCTGTTTTCTATACAC  
GAAAGGATGTGAGACGGCACATGGTGGTCCACACAGGGCGAAAGGATTTT  
CTGTGCCAGTATTGTGCCAACCGCTTTGGTAGAAAGGATCATTTGACACG  
GCATGTGAAGAAGAGCCACTCACAGGAGTTGCTGAAAATCAAGACAGAGC  
CTCCTGATATGTTAGGTCTTTTAGCTTCAGGGTCACCGCCTTGCTCCGTG  
AAGGAGGAGCTCAGCCCATGATGTGCGGAATGGGTCCCAACAAAGACCC  
CATGATGGGCAAACCATTCACAGTGGAGCGCCTTTTCCAATGGGAATGT  
ACAACCCCAACCAT-----CTCCAGGCAATGTGCAATTCTGGGGTGGGT  
CACCCA-----CATCCATCACTGATGCCCACTTCTTGTCTGCAGCTAT  
AGGCATGGGCTGTCAATATGGAATATCTCATCTACGCATCTTCTCATTCA  
TGGGATGTTTACAAATCAGCGATGGATCAAATATTGTGAACCTGTTGGCT  
AGTAACCTCTCCTAGTGTTCATATGCTTTGACCCAGCAAAAATACTTCAG  
CAACTATAGTCTGTGATTGGGTTTTATATTTATGAGCCATTGATTACT  
GGAACCTCGACGGTGCAGGAGCACCTGAAGACTCTWAGTCATGGCTTCAAT  
AAGATCTCTTGGATTGACAACTTTTTCCACTACCTGAAGGTGGTGAATGT  
GAGTGCATCAACCAAGAGTGACTTCATCACCATCCTCAAGGACTCCTTCC  
TGCGCAGCCCGAGTACCAGCACTTCACTGAGGACATCATATTCTCTAAA  
A---ACCGTGAAACTG-----ATGAGTACAATATTATTGCTTCGAGGAT  
GTACCTAGTGGCACGGACAACAGAGAAGAAACCGGAAGAGGTGGTGGAGC  
TTTTGGAAAAGCTTCGTCCACTGATGCTTATCAACAGCATCAAGTTCATT  
GCCTTCAACCCTACATTTGTGTACATGGACCGTTACAGCTCTTCTGTTCAT  
CTCACCCATCCTGACCTCAGGATTCAGCGTACTACAATCCTCATCCTCA  
CTTCTTCTTGGTCATCAACCCCTGGGTAACCTTCTGGCTTATTCTCACT  
GTAACGTCGTGGAGCTAGGTGTCTTGGGTTTGTGNNNNNNNNNNNNNNNNNN  
NNNNNNNNNNNNNNNTCTTGCAATGTTGG  
GATTATTAATGGGCTCTCTGGATGGACTTCCCTCAGTGGATGACTCCCCAG  
CTGACACCATCACTCGGCGGTTTCGCTATGATGTGGCATTGGTGTGAGCG  
TTAAAGGATCTGGAGGAGGATATCATGGATGGTCTGAGAGAGAATGGGAT  
GGAAGACAGCATGTGCACCTCAGGCTTCAGTGTGATGATCAAAGAATCCT  
GTGATGGCATGGGCGATGTGAGTGAAGCATGGCGGTGGACCACTTGT  
CCTGAGAAGGACAGTTCGATTCTCTTCACTGTAATGTCTGTCTCTGTCCA  
GGCAGATGGCACAGAG-----GAAA  
AAGTAACCATATACACGGAGCCCAACCCAACTCAGAGTTGTCTGTGTAAG  
CCCCTTGCTTGATGTTTGTGGATGAGTCAGACCATGAGACACTCACCAC

CATTCTATGGCCTATCATTGCAGAGCGCAATGCAATGAAAGAGAGCAGAC  
TCATCGTATCCGTTGGTGGACTCCTTCGTTCCCTCCGCTTTCCTTCAGAG  
GGCACAGGATATGATGAAAAGATGGTGCCTGAGATGGAGGGCCTGGAGGC  
CTCTGGGTCAACCTTTATTTGTACTCTTTGTGACTCCAGCCGCACTGAAG  
CCTCTCAAACATGGTGCTACACTCAATCACTCGCAGTCATGATGAAAAC  
CTAGAACGTTATGAAATATGGAGAACCAACCCCTTTTCTGAGTCTGCAGA  
CGAGCTGCGAGATAGGGTCAAAGGTGTCTCTGCCAAGCCCTTCATGGAAA  
CCCACCCACGCTGGATGCCCTTCACTGTGACATAGGCAATGCAACTGAG  
TTTTACAAAATCTTCCAGGACGAGATTTGGGGAGGTGTACCGAAAAGC---  
CAAT---CCCAGCCGGGAGGAGCGGCGCAGCTGGAGGGCAGCCTTAGATA  
AACAGCTGAGGAAGGAGATGAAGCTCAAACCAGTAATGAGGATGAATGGG  
AACTATGCCCGCCGGCTAATGACCCTGGAGGCTGTGGAGGTGGTGTGTGA  
GTTGGTGGCCTCAGAGGAGAGGAGGGAGGCCCTGAGGGAGCTTATGAGGC  
TCTACCTCCAGATGAAGCCTGTGTGGCGAGCAACCTGCCAGCCAAGGAG  
TGCCCTGACCAGCTGTGCCGCTATAGCTTCAACTCTCAGCGCTTTGCCGA  
CCTCCTTTCTCTACCTTCAAATATAGGTACAATGGAAAAATAACCAATT  
ACCTGCACAAGACCTTGGCTCATGTGCCTAGAATNNNNNNNNNNNNNNNNNNNN  
NNNNNNNNNNNNNNNNNNNNNTCTTATAACCATTGAGA  
TGGGTCCCTTGGGGCCCCGGTGGAAAAGAGAGCCACAGCCTTTCTGCTGC  
TCCATTGAGGACCCGACAAAACAGACGAAGTTCAAGGGCATCAAGACTTA  
CATTTCATACCGGGTTACTCCAAGCCACACAGGGCATCCTGTCTACAGGC  
GCTACAAACACTTTGACTGGCTGTACAACCGCTTACTGCACAAGTTCCT  
GTGATCTCTGTGCCCTCACCTGCCTGAGAAGCAGGCCACGGGGCGATTTGA  
GGAAGACTTCATCGAGAAGCGTAAGAGGCGACTGATACTGTGGATGAACC  
ACATGACCAGTCACCCAGTCCTTCTCAGTATGAAGTTTTGAGCACTTT  
CTGATGTGTGCTGATGACAAGCAGTGGAACTGGGCAAGAGGCGGGCAGA  
GAAGGACGAGATGGTGGGTGCACATTTTATGCTGACCCTCCAGATCCCTA  
ATGAACACCAGGACCTTTCAGGATGTAGAGGAGCGAATTGACTCCTTCAAG  
GCCTTTGCTAAGAAAATGGATGACAGCGTGTGACAGCTCACACATGTGGC  
CTCCGAGCTGGTGCAGCAAGCACCTGGGGGGATTTCAGGAAGGAGTTCAGC  
GGCTTGAAAATGCCTTCCAGTCTATCAGCCAGGCATTTATGCTAGACCCT  
CCCCACAGCTCAGAGACCTTGAACAATGCCATCTCCATNNNNNNNNNNCGTTCCCTCAA  
CTGACCTCTCTGGGTTTCATCATTGGAGTCCGGTGTGGTTGGAAACCTACT  
GATCTCCATCCTGCTGGTCAAAGACAAAAGCCTGCACCGAGCGCCCTACT  
ATTTCTACTGGACCTGTGCGCCTCTGACATACTTCGGTCCGCCATCTGC  
TTCCCTTTGTCTTTACCTCGGTCAAAGAATGGATCTGCCTGGACGTATAG  
TACGCTGACCTGCAAAGTGATAGCCTTCCCTGGGTGTGCTCTCCTGTTTCC  
ACACGGCGTTCATGCTGTTCTGCGTCAGTGTACGCGCTATCTGGCCATC  
GCACATCACCGTTTCTACACCAAGAGGCTGACCTTCTGGACCTGTCTAGC  
TGTCATCTGCATGGTGTGGACGTTATCAGTGGCCATGGCCTTCCCACCAG  
TGCTCGACGTAGGGACGTACTCTTTTATCCATCAGGAGGACCAATGCACG  
TTCCAGCACCGCTCCTTTCAGGGTGAACGATTCGCTGGGCTTTATGCTCCT  
GCTGGCGCTCATCCTCCTGGCCACACAGCTGGTTTACCTCAAGCTCATCT  
TTTTCGTCCACGACCGTTCGAAAAGATGAAGCCCGTCCAGTTCGTGCCCTGCT  
GTTAGCCAGAACTGGACCTTCCACGGGCCCCGGTGCAGTGGGCAGGCGGC  
CGCCAACTGGTTGGCCGGATTTCGGGCGAGGCCCCACCCACCTACTCTGC  
TGGGCATCCGGCAGAACAGCAATGCAGCGGGCCGAGGCGTCTACTGGTA  
CTGGATGAATTCAAAACAGAGAAGAGGATTAGTAGGATGTTCTACATCAT  
GACCTTTTTCTTCCCTGGCACTGTGGGGGCCTTATCTGGTGGCCTGCTACT  
GGCGGTGTTTGCAGGGGGCCCCGCGGTCCCTGGGGGCTACCTGACGGCA  
GCCGTGTGGATGAGCTTTGCCAGGCTGGGGTCAATCCTTTTCATCTNNNNNNNNNNNNNNNNNGCCA  
AAACTCGCTTTACCCCTGGCATGGGGACTGGGCTGGCACGGAGC---GC  
AGCGTCCCACTCGGCAACAGCTTGCTATCCCCGAGCAAACCGAGGAGCC

CACTGTTGCCACCCCCCGCAGCGATGGTTTGTACCC---CTGCCAACA  
ACCGACTGGACTTTGCTGCCTCGGCATACGACGCCGT-----GAT  
TTCGCCGTAACGCGGCCACCTTGCTGTCCACGCAGCGGCCGGAGTGAA  
GGCTC-----TTCCCCTGCCGACTGCAGGCTGCTCCAACCGCCCTTG  
GTTATTACGCAGACCCGTCAG---GCTGG---GGGGACGCACGCCCG  
CAGTACTGTGGTGTGAATAGCAAATCCGCCTCGGCTTTTTCCTGCTGGCC  
TTCTA ACTCTATTGGAGGCAGAGCGGGCA---CC---AACTACCTGG---  
-----CTGAGGA---AGGA---GACTC---CATGCCGACAGAGAGGTCA  
CCG---AT---CGGCGCTCCGAGGAG---ACCAAACCTAAAGACATAAC  
---ATCAGA---ATCGA ACTGGATAGAG---ACGCCGTCTCCATTAAT  
CCATAGATTTCGAGCGACTCTGGGATCTTTG---AACAGGCCAAACGGAGA  
AGGATCTCACCTTCTGCCACGCCA-----GTTTCAGAGACAGTGTC  
CCCGCTGAAGTCTGAGCATCACTCAACAGGCCAAGTAACAGAGAGAGAAG  
TGGCGTTGGGGATAAATCCGTTTCGCCGATGGGATGGGCGCCTTCAAATA  
AACCACAGCTCCCACGATATTGGCTCCGG---ACAGACGGCGTTTTCCTC  
TCAGGCG---CCTGGCTACGCAGCAGCAGCCCTGGGA---CACCATC  
A-----CCATCTACCCACGTTGGCTCT---TACTCCACGGCAGCTTTC  
AACTCCACCAGGGACTTCTCTTTCAGAAATCGGGGATTCGGGGACGCCAC  
CAG-----CGCGCAGCACAGTTTGTTCGCCTC-----CG  
GAAGTTT---C-----GCAGGGCCACATGGACACTCAGATGCAGCGGG  
CACCTGCTCTTCCCGGGGCTCCACGAG---CAAGCGCGAGCCACGCGTC  
TTCCAATGTGGTTAACAGTCAGATGCGCCTGGGCTTTTCGGGGGACATGT  
ATGGACGGGCGACCAATATGGCCACGTTACAAGCCCGCGGT---CCGAC  
CACTATGCTTCGACCAGCTGCACGGCTACGGCCCCATGAACATGAATAT  
GGCCGCT---CACCACGGAGCAGGGGCTTCTTTTCGATACATGAGGCAGC  
CGATCAAACAAGAGCTCATCTGCAAATGGATCGAGCCTGAGCAGCTGACG  
AATCCCAAAAAGTCATGCAACAAAACTTTTAGCACGATGCACGAGCTGGT  
GACCCATCTGACGGTGGAGCATGTGGGGGACCCGAGCAGACCAACCACG  
TCTGCTTCTGGGAGGACTGCTCCAGAGAAGGAAAGCCATTCAAAGCCAAA  
TACAAACTTGTGAATCATATCAGAGTACACACCGNNNNNNNNNNNNNNNNNNNN  
NNNNN

>Triphoturus mexicanus

AGCCTCTTAATTCGAGCTGAACCTCAGCCAACCTGGAGCCCTCCTGGGCGA  
CGACCAGATTTATAACGTAATCGTAACAGCCCACGCTTTTGTGATAATCT  
TCTTTATAGTAATGCCTATCATGATTGGAGGGTTTCGGCAACTGACTAATC  
CCCTTAATAATCGGAGCCCCTGATATGGCCTTCCCCGAATGAATAACAT  
GAGCTTCTGACTTCTCCACCATCATTCCTCCTTCTCCTAGCCTCATCCG  
GGGTTGAGGCCGGGGCCGGAACACTGGTTGAACAGTCTATCCCCACTTGCG  
GGGAATCTCGCCCACGCTGGAGCCTCTGTGACCTTACGATCTTCTCCCT  
GCATCTTGCAGGTGTCTCATCCATCTAGGGGCCATTAACCTTTATTACAA  
CCATCATTAACATGAAGCCCCCAGCAATTACTCAATACCAAACCCCTCTG  
TTCGTCTGAGCAGTAATGATTACAGCCGTA CTCTGCTCCTATCCCTGCC  
AGTCTTAGCGGCTGGAATTACAATACTTCTGACAGACCGAAATCTAAATA  
CTACCTTCTTCGACCCCGCCGGAGGGGAGACCTATCTCTACCAACAC  
TTATCTGATTCTTCGGGCACCCGGAAGTCTACATCTTATTCTTCCTGG  
CTTCGGTATAATCTCCACATCGTTCGCGTACTACTCGGGTAAAAAGAGC  
CTTTCGGGTACATGGGCATGGTCTGAGCAATGATGGCCATCGGGTTCCTT  
GGCTTATTGTCTGAGCCACCACATATTTACCGTGGGAATAGACGTAGA  
CACACGAGCATA-----  
-----  
-----  
-----  
-----



GGGATGTTTACAAATCAGCGATGGGTCAAACATCGTGAACCTGATGGCGA  
GTAACTCTCCGAGCGTGTCTTTTCGCGCTCACCCAGCAGAAGTACTTCAGT  
AACTACAGCCCCGTATTGGGTTCTACATTTACGAACCCATCGAGTACTG  
GAACGCCACGGTGCAGGAGCACCTGAAGACGCTCAGTCACGGCTTCAACA  
AGATCTCCTGGATCGACAACCTTCTTCCACTACCTGCGGGTGGTGAACGTG  
AGCGCGTCGACCAAGAGCGACTTCATCAGCATCCTGAAGGGCTCCTTCTCCT  
GCGCAGCCCCGAGTACCAGCACTTCAACGAGGACATCATCTTCTCCAAGA  
---ATCGCGAGAGCG-----ACGAGTACGACATCATCGCCTCGCGCATG  
TACCTGGTGGCGCGCACCACCGAGAAGAAGCGCGAGGAGGTGGTGGAGCT  
GCTGGAGAAGCTGCGTCCGCTGATGCTGATCAACAGCATCAAGTTCATCG  
CCTTCAACCCACCTTCGTCTTTCATGGACCGCTACAGCTCCTCGGTCATC  
TCGCCCATCCTTACCTCAGGCTTTCAGCGTGCTCACCATCCTCATCCTCAC  
GTTCTTTCTCGTCATCAACCCGCTGGGGAACCTTCTGGCTCATCCTGACGG  
TCACGTCCGTGGAGCTGGGCGTGCTGGGTCTGATGGGCTACCACCCCTTT  
GAGTGGCAGCCGGCCCTCAAGAGCGTGTCCCCCGCTGCCACGTGGGCAT  
CATCAACGGGCTCTCTGGCTGGGCCGACTTGGTGGATGACTCACCGGCGG  
ACACCATAAGCCGGAGGTATCGATATGACGTGGCCCTTGTGTCTGCCTTG  
AAGGACCTGGAGGAGGAAGTAATGGAGGGACTGAAAGAGTGCGGGCTAGA  
TGACAGCGCATGCACTTTCAGGCTTTCAGCGTGATGATCAAAGAGTCCTGCG  
ATGGCATGGGAGACGTCAGCGAGAAGCATGGCGGGGGCCCGCAATCCCT  
GAGAAAGCGGTCCGCTTCTCCTTTCACGATTATGTCCATCTCCGTGACGCC  
GGACGGGAAAGCG-----GAGGCGG  
TCACCATCTTACGGAGCCGAAGCCCAACTCTGAGCTGTCTGTAAGCCC  
ATGTGCCTGATGTTTGTGGACGAGTCGGACCACGAGATGCTCACCGCCGT  
CTTGGGGCCCGTGGTTCGAGAGCGGAAGGCGATGACGGAAGCCGACTCA  
TCCTGTCCATGGGCGGCCTCCCCCGCTCGTTCCGCTTCTACTTCAGAGGC  
ACTGGCTACGACGAGAAGATGGTGCAGGAGATGGAGGGCCTGGAGGCGTC  
AGGCTCTACCTATGTCTGCACTCTGTGCGACTCCACCCGGGCGGAGGCCT  
CCCACAACATGGTGTCTCCATTCCATCACCCGACGCCACAGCGAGAACCTG  
GAGCGCTACGAGATATGGCGGAGCAACCCCTTCTCGGAGTCCGTGACGA  
GCTGCGGGATCGGGTGAAGGGGGTCTCCGCCAAGCCCTTTCATGGAAACCC  
AGCCACCCCTGGACGCGTTGCACTGTGACATCGGTAACGCCACGGAGTTC  
TACAAAATCTTCCAGGACGAGATCGGGGAGGTGTTCCAGAGGGC---CAA  
C---CCCAGCCGCGAGGAAAGGCGACGCTGGAGGGCCGCCCTCGACAAGC  
AGCTGAGGAAAAAGCTCAAGCTCAAGCCGGTGTGCGGATGAACGGGAAC  
TACGCCCGGAGGCTGATGTCCGAGGAGACCGTGGACGTGGTGTGCGAGCT  
GGTGCCCTCGGAGGAACGGCGGGAGGCTCTGAGGGAGCTGATGGGGCTTT  
ACCTCCAGATGAAGCCTGTGTGGCGCGCCAGCAACCCGGCCAAAGAATGC  
CCCGACCAACTGTGCCGCTACAGCTTCAACTCCAGCGATTTGCGGACCT  
CCTCTCCACCACCTTCAAATACAGGTACG-----  
-----TCGTACAC  
CATCGAGATGGGCCCCAAGGGGCTCCTGTGGAAGGAGAGCCCCCAGCCCT  
TCTCCTGTTCCATTGAGGACCCCACTAAACAGACCAAGTTC AAGGGCATC  
AAGACTTACATCTCTACCAGGTCACACCGAGCCACACGGGTACCCCGT  
GTACAGACGCTACAAGCACTTTGACTGGCTGTACAACCGCTTGTCTGCACA  
AGTTCACCGTGATCTCCGTCCCCACCTGCCGGAGAAGCAGGCGACGGGG  
CGCTTCGAGGAGGACTTTATAGAAAAGCGCAAGAGGCGGCTGATCCTCTG  
GATTAACCACATGACCAGCCACCTGTCTCTCCAGTATGAGGGCTTTG  
AACACTTCTGATGTGTGGCGATGACAAGCAGTGGAAAGTTGGGCAAGCGG  
CGAGCGGAGAAGGATGAAATGGTTCGGTGCACACTTCATGCTGACCTTCCA  
GATCCCCAACGAGCACCAGGACCTCCAGGACGTAGAGGAGCGCGTTGACT  
CCTTCAAGGCGTTTGCCAAGAAGATGGACGACAGTGTTCATGCAGCTGACA

CACGTAGCCTCGGAACTTGTGCGCAAGCACGTGGGCGGGTTCGCAAGGA  
GTTCCAGCGGCTGGGGAACGCCTTCCAGAACATCAGCCAGGCCTTCATGC  
TCGACCCACCTCATAGCTCAGATGGCCTCAACAACGCC-TCTCACAC---

-----GCCAAGTCCCGCTTTC  
ACCCTGGCGTGGGGAGCGCTGCTGGCACGGAGC---GCAGCGTCCCCTC  
AGCAACAGCTTGCTCTCTCCGCAACAAACCGAGGATCCCGCCGTCG---C  
CTCCCCGCAGCGATGGTTTGTACCC---CTGCCAACAACCGACTGGACT  
TCGCAGCCTCGGCATACGACGCCGCT-----GATTTGCGCCGTAAC  
GCGGCCACCTTGCTGTCGTACGCCGCGGCCGGAGTGAAGGCTC-----T  
CCCCCTGCCGACCGCAGCTTGCTCCAACAGACCTCTGGGTTATTACGCGG  
ACCCGTCGG---GCTGG---GGCGCGGCACGCCGCCAGTACTGT---  
-----ACAAGTCGACCTCGGTCTTTCTTGCTGGCCACGAATCTGT  
AGGGAGCAGAACGGGCA-----CAAACACTACCTAG-----TGGAGG  
A---CGGATCGGACGC---CATCCAACGGAGAGG-----AT---T  
AATGGCTCGGAGGAG---GCGAAAGCCAAAGACTT-----GTCTGA---  
GTCTAGCTGGATAGAG---ACGCCATCTTCGATCAAATCAATTGACTCGA  
GTGATTCTGGCATCTTTG---AGCAAGCAAAGCGGAGACGAATTCACCG  
TCTGCCACACCA-----GTTACAGAAACGGTGTCTCCGTTGAAATC  
TGAA-----TCAACAGCGAAGTCACGGAGCGAGAGGTGGCGTTGGGGA  
TCAACCCGTTTCGCGGACGGCATGGGCGCCTTCAAGATCAACCACGGCTCC  
CACGACATCGGCTCCGG---GCAGACGGCTTTCTCCTCGCAGGCG---CC  
CGGCTAC---GCGGCGGCCGCCCTGGGG---CACCACCA-----CCACC  
CGACGCACGTCAGCTCG---TACTCCACGGCCGCTTCAACTCCACCAGG  
GACTTTCTGTTTCAAGAAACCGCGCTTCGGAGACGCCACGAG-----  
CGCCGCGCAGCACAGCTTGTTTCGCTCCGC---CGCGGGGAGCTT---C-  
-----GCGGGGCCACACGGACACTCGGATGCCGCGGGGCACCTGCTCTTC  
CCCGGGCTCCACGAA---CAAGCCGCGAGCCACGCGTCTTCCAACGTCGT  
CAACGGCCAGATGCGGCTGGGCTTTTCGGGGGACATGTACGGCCGCGCCG  
ACCAGTACGGCCACGTCACGAGCCCGCGGT---CCGACCACTACGCGTCG  
ACCCAGTTGCACGGCTACGGCCCCATGAACATGAACATGGCCGCGCATCA  
CCACGGAGCCGGGGCCTTCTTTTCGGTACATGCGGCAGCCGATCAAGCAGG  
AGCTCATCTGCAAGTGGGTGCGAGCCGGAGCAGCTGTCGAACCCCAAGAAG  
GCGTGAACAAAACCTTTCAGCACGATGCACGAGCTCGTCACCCATCTGAC  
GGTGGAGCATGTGGGGGGGCCCGAGCAGGCGAACACATCTGCGTCTGGG



AGGACTGCGCCCGGGAGGGCAAGCCGTTCAAAGCCAAATACAAACTTGTG  
AATCATATCCGAGTGCACACTGGAGAAAAGCCCTTCCGTGTCCCTTCCC  
CGGCTGTGGCAA

>Umbra limi

AGTCTCTTAATTTCGAGCCGAACCTCAGTCAACCAGGCGCCCTACTGGGGGA  
TGACCAGATTTATAACGTTATCGTCACCGCCCACGCTTTTGTATAATTT  
TCTTCATAGTTATAACCCATTATAAATTGGAGGGTTTGGTAATTGACTAATC  
CCCCAATAAATTGGAGCCCAGACATGGCATTCCCTCGAATAAATAACAT  
AAGCTTCTGGCTTCTCCTCCCTCCTCCTTCTTCTTTTAGCATCTTCAG  
GGGTGAAGCTGGCGCCGGAACGGGGTGAACAGTTTATCCCCCCTGGCT  
GGCAACCTCGCTCACGCCGGCGCCTCCGTAGACCTAACTATCTTTCCCT  
CCACCTAGCTGGGGTCTCTTCCATTTTAGGGGCCATTAECTTCATCACAA  
CAATCATTAACATAAAAACCCCCGCCATCTCCCAATATCAAACACCCTTA  
TTCATCTGAGCTGTATTAATTAAGTGCCTCCTTCTACTTCTTTCCCTCCC  
TGTTCTAGCTGCCGGAATTACAATACTTCTCACGGACCGAACTTAAATA  
CCACCTTCTTTGACCCTGCAGGGGGAGGAGACCCCATTCTTTACCAACAC  
CTCNNNNNNNNNNNNNNNNNNNNNNNNNNNNNNNNNNNNNNNNNNNNNNNNNNNN  
NNNNNNNNNNNNNNNNNNNNNNNNNNNNNNNNNNNNNNNNNNNNNNNNNNNNNN  
NNNNNNNNNNNNNNNNNNNNNNNNNNNNNNNNNNNNNNNNNNNNNNNNNNNNNN  
NNTTCCCTGGAGCGGAACCTGCACCCGTCCAACCTGCCTGGGCATGCTGCT  
GCTGTCCGATGCCACCAGTGCACCAAGCTGTCCGAGCTCTCCTGGGGAA  
TGTGCCCTCAGCAACTTCCCAGCCATCTGCAAGACAGAGGAGTTCTGCAG  
CTTCCCAAGGACATGGTGGTGAACCTCCTGTGCCACGAGGAGTTGGAGAC  
AGACGACGAGAGGCTGGTCTACGAGGCCGCCCTCAACTGGGTGAACTACA  
ACCTGGAGAGTAGGCACCTGCCACCTGCCTGAGCTGCTGCAGACCGTCCGC  
CTGGCCCTCCTCCCGGCCATCTTTCTCATGGAGAACGTTTTCCACGGAGGA  
GCTCATCAATGCCCAGCTGAAGAGCAAGGAGCTGGTGGATGAAGCGATT  
GCTGCAAGCTGAAGATACTCCAGAATGACGGGGTGGTGAACAGCCCCTGC  
GCCCCGCCCCGGAAGACCAGCCATGCCCTTTTCCCTCCTGGGAGGACAGAC  
GTTTCATGTGCGACAAGCTGTACCTGGTTCGACCAGAAGGCCAAGGAGATCA  
TCCCCAAGGCCGACATCCCCAGCCCCAGGAAGGAGTTCAGCGCCTGCGCC  
ATTGGCTGTAAGGCTACGTGACCGGTGGTA--GGGGCTC-TGAGAATGG  
CGTGTCAAAGATAACATGGGTGGAGACACAGNNNNNNNNNNNNNNNNNNNNNNNN  
NNNNNNNNNNNNNNNNNNNNNNNNNNNNNNNNNNNNNNNNNNNNNNNNNNNNNN  
NNNNNNNNNNNNNNNNNNNNNNNNNNNGGATGAGTACATCGTAGT  
GTTTCAGTCGCTCCGTTAACAGGCTCATCTTGAACGAAGCGGAGCTGATCA  
TGGCATTATCGCAGGAGTTCCAGATGAGAACCATAACGGTATCTCTGGAA  
GATCAGACCTTCCCAGCATTGTCAAGGTCATCAGCGGGCCTCCATGTT  
GGTCAGCATGCACGGAGCACAGCTTGTCTCATCTCTTCTCCTTCCCCGGG  
GGGCGGTTGTGGTGGAGCTTTTCCCCATGCAGTCAACCCAGAGCAGTAC  
ACCCCTTACAGAACCCTGGCCTCTCTACCAGGCATGGAGCTGCAGTATGT  
AGCCTGGAGGAACATGCTGGAGGAGAACTCTGTGGCCTACCCAGAGAGGC  
CCTGGGAGCAGGGAGGCATTGCTCACCTGGAGAAGGACGAGCAGGATCGC  
ATCCTTGCCAGTAAGGAAGTACCAGGCACCTGTGCTGCCGCAATCCTGA  
ATGGCTGTATCGTATCTACCAGGACACTATAGTGGACATCCCTTCTTTAA  
TGGAGGCTCTCAG---AGAAGCATTGAAA---ACCAGGCCAAAACCGACA  
AA---GGCCAAGCCTTCCAGCACAGTGCACCCAGGCCGAGTCAGAGAGCC  
TCAGTGCCAGACGTCGGTCCAGGCCACCAATGAAGCCAAGCTGACTGTTT  
CCTGGCAAATCCCCCTGGAACCTCAAGTACCTAAAGGTCAGGGAGGTGAAG  
TANNNNNNNNNNNNNNNNAAGGGATCCAAGCAAGGGGACCCTGGAAGATCAAA  
TAAATCCAGGCT  
AACCCAGCACTGGAGGCTTTTGGTAATGCCAAAACAATAAGGAATGACAA  
CTCTTCGCGTTTTTGGTAATTCATCCGCATTCACTTTGGAACCAGCGGGA  
AACTGTCTCTGCCGACATTGAGACTTACCTTCTTGAGAAGTCCCGTATC



ACCGGGTCAAAGGCGTCTCTGCGAAACCCTTCATGGAGATCCATCCCACC  
CTGGACGCTCTGCACTGCGATATCGGCAATGCCACAGAGTTCTACAAAAT  
CTTCCAGGATGAGATAGGGGAGGTCTACCAAATCC---CAAC---CCTA  
GCAAAGAGCTGCGCCGAGCTGGCGGTCTGCCCTTGACAAGCAACTAAGA  
ACAAAGATGAAGCTGAAGCCTGTGATGAGGAT-----

-----  
-----  
-----  
-----  
-----  
-----  
-----  
-----  
-----  
-----  
-----  
-----  
-----  
-----  
-----  
-----  
-----  
-----  
-----  
-----  
-----

-----CCTCTCGCCAC  
CTTTCTCAAACGACATCCCTGGGTTTTATCATCGGCGTCGGTGTGGTTG  
GGAACCTCCTGATCTCCATCCTACTGGTCAAAGACAAAAGCCTGCACCGT  
GCGCCCTACTACTTCCCTTGACCTGTGCGCCTCGGATATCCTGCGCTC  
CGCCATCTGCTTTCTTTTGTCTTACCTCTGTCAAGAATGGTTCCACCT  
GGACGTATGGCAGCTAACCTGCAAAGTGATAGCCTTCCTCGGGGTGCTG  
TCTTGCTTTACACAGCATTTCATGCTGTTCTGTGTGAGCGTGACACGCTA  
CCTGGCCATAGCCCACCATCGCTTCTACACCAAAGGCTCACCTTCTGGA  
CGTGTCTGGCAGTCATCTGCATGGTGTGGACGTTGTCAGTGGCAATGGCC  
TTTCCACCGGTGCTAGATGTGGGGACATACTCATTTATAAGGGAAGAGGA  
CCAGTGTACGTTCCAGCACCGCTCGTTCCGAGCCAATGACTCCCTCGGCT  
TCATGCTGCTACTAGCCCTCATTCTTCTGGCTACCCAGCTTGTCTACCTC  
AAGCTAATTTTCTTTGTCCACGACCGGCGGAAGATGAAACCAGTCCAGTT  
TGTGCCCTGCCGTACGCCAGAACTGGACCTTCCATGGCCCTGGGGCCAGCG  
GCCAGGCGGGCGGCTAACTGGCTAGCAGGGTTCGGCAGGGGCCCCACCCCT  
CCCCTCTGCTAGGCATCAGGCAGAACAGCAACGCAGCTGGCCGGCGACG  
CCTGTTGGTGTGACGAGTTTAAAACGAAAAGAGGATAAGTAGAATGT  
TCTACATCATGACCTTCTTTTCTCACTCTGTGGGGACCATACTGGTG  
GCCTGCTATTGGAGGGTGTGTTGCCAGGGGCCAGCAGTCCCTGGAGGCTA  
TCTGACCGCAGCAGTGTGGATGAGCTTTGCTCAGGCGGGAGTCAACCCCT  
TCATCTGCATCTTCTCCAACAGAGAG-----

-----  
-----  
-----  
-----  
-----  
-----  
-----  
-----  
-----  
-----

-----  
-----  
-----  
-----  
-----  
-----  
-----

-----ACAGGCGAAGTCACAGAAAAGAGAAGTTGCTTTGGGGATAAACCCG  
TTCGCAGACGGGATGGGCGCTTTTAAAATCAACCACAGTTCTCACGACCT  
GGGCTCCGG---GCAGACGGCGTTTTCTTCCCAAGCT---CCCGGCTAC-  
--GCTGCAGCTGCGTTGGGT---CACCACCA-----CCACCCAACACAC  
GTTAGCTCA---TATTCACCCGAGCCTTCAATTCACCCGGGACTTTCT  
CTTCAGAAACAGGGGCTTCGGAGATGCGGCCAG-----CGCAC  
AGCACAGCCTGTTTGCCTCAGC---AGCGGGAAGTTT---T-----GCA  
GGGCCACATGGACACTCAGATACCGCGGGGCACCTGCTTTTCCCGGGACT  
CCACGAG---CAAGCCGCGAGCCATGCATCTTCGAATGTGGTCAACAGCC  
AAATGCGACTGGGCTTTACCGGGGACATGTACGGCCGGCCTGACCAGTAT  
GGCCACGTTACCAGTCCCCGCT---CTGATCACTATGCCTCCACTCAGCT  
TCACGGTTACGGCCCCATGAACATGAATATGGCGGCT---CATCACGGAG  
CAGGGGCCTTCTTCAGATACATGAGGCAGCCGATTAAACAAGAGCTTATC  
TGCAAATGGGTGGAACAGAGCAGTTGTCAAACCCCAAAAAGTCTTGCAA  
CAAAACCTTCAGCACAATGCACGAGTTGGTGACACACCTGACGGTTGAGC  
ATGTCGGTGGACCGGAGCAGTCGAACCATATCTGTTTTTGGGAAGAATGT  
GTGCGAGAAGGAAAGCCATTCAAAGCAAATACAACTTGTAAATCATAT  
CAGAGTTCACACCGGAGAAAACCATTCCCATGTCCATTCCCAGGTTGTG  
GCAAA

>Xenentodon cančila

AGCCTACTTATTTCGGGCTGAGCTAGCTCAGCCAGGGGCTTTGCTGGGCGA  
TGATCAAATTTACAATGTCATTGTTACTGCCCATGCCTTCGTTATAATTT  
TCTTTATAGTAATACCAATTATGATTGGGGGTTTCGGCAACTGACTTGTG  
CCTCTAATAATTGGAGCCCCGACATAGCCTTCCCCGAATAAATAATAT  
AAGCTTTTACTCCTCCCACCCTCTTTCCTCCTGCTTTTAGCCTCCTCTG  
GCGTTGAAGCGGGGCGAGAACAGGTTGAACTGTTTATCCCCGACTCGCT  
GGAAATTTAGCACACGCAGGAGCCTCTGTAGACCTAACTATTTTCTCCCT  
CCACCTTGCGGGGGTTTCTTCTATTTTAGGGGCTATTAATTTCAATTACCA  
CTATTATTAACATAAAACCCCGCAATTTACAAATATCAAACACCCCTG  
TTTGTATGGGCTGTCTAATTACAGCAGTCCTTCTTCTACTATCACTACC  
AGTACTAGCTGCCGGAATTACAATGCTCTTAACAAACCAAATCTTAAATA  
CAACCTTCTTTGACCCGGCGGGAGGGGAAGACCCAATCCTTTACAAACAT  
TTATTC-----  
-----  
-----

-----TTCTTGAAAGAAACCTTCACCCGTCCAACCTGCCTTGG  
CATGCTGTTGCTGTCTGACGCCACCAGTGTACCAAGCTGTCAGAGCTCT  
CCTGGGGCATGTGTCTAAGCAATTTCCCTGCGATCTGCAAGACAGAAGAC  
TTCTCCAACCTGCCAAAGATATGGTGGTGCAGCTTTTGTACACGAGGA  
GCTAGAGACAGAAGATGAGAGACTGGTTTATGAAGCAGCTCTGAACTGGA  
TCAACTACGACCTGGAAAGGAGACACTGCCATCTTCCAGAGCTCCTGAGA  
ACAGTCCGCCTCGCCCTGCTTCCCGCTATCTTTTGTATGGAGAACGTTTC  
AACAGAAGAGCTGATCAACGCCAAGCAAAGAGCAAGGAACTGGTGGATG  
AAGCTATTGCTGTAAAGCTGAAGATCTTGCAGAAATGATGGCGTTGTTAAC  
AGCCCTTGTGCTCGACCAAGAAAACAGTCATGCCCTTTTTCTTCTCGG

TGGGCAGACGTTTCATGTGTGACAAGCTGTATCTGGTGGACCAGAAGGCCA  
AAGAGATCATTCCAAAAGCAGACATTTCCAGCCCCAGGAAGGAATTCAGC  
GCATGTGCAATTGGCTGTAAGGTGTACATCACTGGTGGAA--GAGGGTC-  
AGAGAAATGGCGTGTCCAAAGATGTATGGGTCTACGACACGGTCCACGAAG  
AATGGTCAAAGGCGGCCCATGCTCATCGCCAGGTTCCGGCCACGGCTCT  
GCGGAGCTAAAGCATTGCCTCTACGTTGTAGGAGGGCACACTGCTGCAAC  
CGGCTGCCTCCCGCTTCTCCGTCTGGATGAATATATTGTTGTATTTAGT  
CGTTCAACAACGAGGCTCATTCTGAATGAAGCAGAGCTGGTCATGGCGAT  
GGCCAGGAGTTCCAGATGAGAGTAGTCACAGTATCCTTGGAAGAACAAT  
CTTTTTCTAGTATCATCCAGGTGGTCAGTGGTGCTTCCATGCTAGTCAGC  
ATGCATGGAGCCCAGCTTATCACATCCCTGTTTCTCCCCAGAGGAGCTGC  
AGTTGTGGAGTTGTTCCCTTTGCTGTGAACCCAGAGCAGTACACGCCAT  
ATAAAAACCTTGCTTCCCTTCCAGGCATGGATCTTCACTACATCTCCTGG  
AGGAACATTAAGGAGGAAAACACAGTCACCCATCCAGACAGGCCATGGGA  
GCAAGGAGGGATTAGTCACTTGGGAAAAGAAGAGCAGGAAAGAATTCTGG  
CAAGCAAGGAGGTCTCCAGGCACCTGTGCTGCCGTAACCCAGAGTGGCTC  
TTCAGGATCTACCAGGACACTTTGGTGGACATCCCATCTTTTTTGGAGGT  
CCTCAG---AGAAGGCATGAAG---TCAAAGCCCAGTATGAAGAA---GA  
CCAAGGCAGTCAGTATAGTCCACCCTGGTCCGGTCCAGAGAAGCCCAGTGT  
CAGACTTCAGTACAAAACACTAATGAGGCTAAACTCACCGTGTTTTGGCA  
GATCCCCTGGAATCTGAAATATCTGAAAGTGAGAGAGGTGAAGTATGAAG  
TGTGGATCCAGAAAAAGACACCAATAAAGGAACGTTGGAGGATCAAATC  
ATCCAGGCAAACCCAGCACTGGAAGCCTTTGGCAATGCCAAGACTGCGAG  
AAATGACAACCTCGTCTCGCTTTGGAAAATTCATTCGAATTCATTTTGGAA  
CAAGCGGGAAGYGTGTCATCTGCTGATATTGAGACATACTTGTGAAAAAG  
TCACGTGTTACCTTTCAGCTCAAGGCTGAGAGGAACTACCACATCTTCTA  
CCAGATCCTGTCCAATCAGAAGCCAGAGCWNNGNACTTGGTGTCTCATCACCA  
ACAACCCCTATGACTACTCCTACATCTCCAAGGAGAGGTAACAGTGGCC  
TCCATTAATGACTCTGAGGAACTGATGGCCACTGACAGCGCCTTCGATGT  
GCTTGGTTTTACCTCTGATGAGAAGATGGGTGTCTACAAGCTGACTGGTG  
CCATCATGCACTATGGCAACATGAAGTTTAAACAGAAGCAGCGTGAAGAG  
CAGGCTGAACCTGACGGGACAGAGGCGGCTGATAAATCAGCTTACCTGAT  
GGGCTGAACTCTGCAGACCTCATCAAAGGCTTGTGCCATCCCAGAGTCA  
AGGTGGGAAATGAGTATGTCACCAAGGGCCAAAGCGTGGACCAAGTCTAC  
TATCCCAACAAGGAGGCCTTCAAGTGTGATGAGTGTGGGAAGCACTACAA  
CACCAAGCTGGGATACAAGCGCCATGTGGCCATGCACTCCGCAACCGCCG  
GGGATTTAACATGCAAGGTGTGCATGCAGAGTTACGAGAGCACGCCGTT  
CTCTTAGAGCACCTAAAGAGCCACTCGGGAAGTCTTCAGGTGGTGCCAA  
AGAGAAAAGCACCCCTTGTGACCACTGTGACCGACGTTTCTACACTCGGA  
AGGATGTGAGACGGCATATGGTGGTCCACACAGGCCGCAAGGACTTTCTC  
TGCCAGTACTGTGCCACGCTTTGGCAGGAAGGACCACCTGACGCGGCA  
TGTGAAGAAGAGCCACTCGCAGGAGTCCTAAAGATCAAGACGGAGCCCC  
CGGATATGTTGGGCTTGTAGCGTCAGGGTCCCCGCCGTGCCCTGTCAAG  
GAAGAGCTCAGCCCCATGATGTGTGGTATGGCGCCAACAAAGACCCCAT  
GATGGGCAAGTCCTTCCCTAGTGGGGCACCATTTCCCATGAGCATGTACA  
ACCCCAACCAT-----CTCCAGGCCATGTCCAATTCGGGGTGGCTCAC  
CCG-----CACCCCTCCCTGATGCCAGTTCCCTGTCTGCAGCTATGGG  
CATGGGCTGCCACATGGAATATCTCATCTATGCTTCTTTCTCATTCATGG  
GATGTTTACAAATCAGTGTGGATCCAATATCGTTAACCTGTTGGCTAGT  
AACTCTCCGAGTGTTCGTATGCTCTGACCCAGCAAAAATATTTTCAGTAA  
TTATAGTCTGTTATTTGGTTTTTACATTTATGAGCCAATTGAGTACTGGA  
ACTCCACAGTGCAGGAGCACCTCAAGACTCTGAGTCATGGCTTCAACAAG  
ATCTCCTGGATGGACAACCTTTTTTCCACTACCTGCGGGTAGTAAATGTGAG

TGCATCAACCAAGAGTACTTCATCAACATCCTCAAGGGTTCCCTCCTAC  
GAAGCCAGAGTACCAGCATTTACCCGAGGATATCATATTCTCTAAGA--  
-ACGCGGAGACAG-----ACGAATATGACATCATAGCCTCACGGATGTA  
CTTGGTCGCGCGGACCACTGAGAAGAAGCGAGAAGAGGTGGTGGAGCTTT  
TAGAGAACTTCGCCCTTGATGCTGATCAACAGCATCAAATTCATTGCC  
TTCAATCCCACGTTTGTTTTCATGGACCGCTATAGCTCCTCTGTTATCTC  
GCCATCCTGACCTCAGGCTTACAGCTACTTACCATCCTCATTCTCACTT  
TCTTCCGGTCATCAATCCATTGGGAACTTCTGGCTCATTCTCACGGTG  
ACTTCCGTGGAGCTGGGCGTCTTGGGTTTGGATGNNNNNNNNNCAGTTGAGTGGCAGCC  
AGCTCTCAAGAATGTGTCTACATCTTGCGGTGTGGCATTATTAACGGGC  
TCTCTGGGTGGGCGTCTCAGTGGATGACTCCCCAGCTGACACTATCACT  
CGTCGCTTTCGCTATGATGTTGCGCTGGTGGCAGCATTAAGGATCTGGA  
AGAGGACATCATGGAGGGGCTGACACAGAATGGGATGGAAGACAGCGCTT  
GCACCTCAGGCTTTAACGTCATGATCAAGGAATGCTGTGACGGCATGGGG  
GATGTCAGCGAGAAGCACGGTGGAGGACCAGCTGTTCCCTGAGAAAGCCGT  
CCGCTTCTCTTTCAGTGTATGTCTATCTCTGTCCACGGAGAAGGTGACA  
AT-----GAAGCGGTTACAATTTTC  
ACTGAACCAAAGCCAACTCCGAGCTGTCTTGTAAACCGCTTTGCCCTGAT  
GTTTGTAGACGAGTCAGACCACGAGACAGTCACAGCTGTTCTGGGGCCTA  
TAGTTGCAGAGCGTAATGCAATGAAAGAGAGCCGGTTAATCCTATCCATG  
GGAGGCTTGCCACGCTCCTTTCGCTTTCAGTTTACAGGGGTACAGGATATGA  
TGAAAAGATGGTGCCTGAGATGGAGGGCCTGGAGGCCTCTGGGTCAACGT  
ATGTCTGCACTCTGTGCGACTCAAGCCGTGCGGAGGCTGCTCAAAACATG  
GTGTTACATTCCATCACACGCAGCCATGATGAGAATCTAGAACGTTATGA  
AATATGGAGAACCAACCCATTTTCTGAGTCTGTGGAAGAGCTACGAGACA  
GAGTCAAAGGAGTCTCTGCCAAGCCGTTCCCTGGAGACGCAGCCCACGCTA  
GATGCATTACACTGCGACATTGGCAATGCCGTTGAATTCTACAAAATCTT  
CCAGGACGAGATTGGAGAAGTTTACAAAAAGT---CAAC---CCCAGTC  
GCGAAGAGCGACGCAGCTGGAGGGCAGCCTTAGATAAACACCTGAGGAAG  
AAGATGAAGCTCAAACCAGTCATGAGGATGAATGGGAACCTATGCCCGAAG  
ACTAATGACCCTGGAGTCTGTGGAGGTGGTGTGTGAGCTGGTGGCCCTCAG  
AGGAGAGGAGAGAGGTCCTGAAAGAGCTTATGAAACTCTACCTCGAGATG  
AAGCCTGTGTGGCGGCCACCTGCCCGCCAAGGAGTGTCCCGAGCAGCT  
CTACGGCTACAGTTTAACTCACAGCGTTTTGCTGATCTCCTCTCCTCTG  
CCTTTAAATATAGGTACAACGGAAAGATAACCAATTACCTGCACAAGACC  
CTGGCTCACGTGCCTGAAATCATAGAGAGAGATGGATCTATTGGAGCCTG  
GGCCAGCGAGGGGAACGAGTCAGCAAACAAATCATACACTATCGAGATGG  
GTCTCTGGGGCCTCAATGGAAGGAGAACCCACAGCCTTTCACCTGCTCC  
ATTGAAGACCCACCAAGCAGACCAAGTTCAAGGGTATCAAGACCTATAT  
ATCGTACCGGGTGACACCGAGCCACACGGGGTGTCTGTTTACCGGCGCT  
ACAAACACTTTGACTGGCTGTACAATCGACTGCTGCACAAGTTCACTGTG  
ATCTCTGTGCCTCACCTGCCCCGAGAAGCAGGCCACAGGGCGATTTCGAGGA  
AGACTTCATCGAGAAGCGGAAAAGGCGTCTGATACTGTGGATGAACCACA  
TGACTAGTCACCCAGTCTCTCGCAGTACGAAGGCTTTGAACACTTTCTG  
ATGTGTGCAGACGATAAGCAGTGGAAAGCTGGGCAAGAGGCGGGCAGAAAA  
GGATGAAATGGTGGGCGCCATTTTCATGCTGACCCCTCAAATCCCAGTG  
AGCACCAAGATCTGCAGGATGTTGAGGAGAGGGTTGACAACCTCAAGGCC  
TTTGCCAAGAAGATGGATGACAGCGTGTGATGCAGCTTACTCATGTTGCCTC  
GGAGCTAGTGCCTAAACACCTGGGTGGATTACAGGAAAGAGTTCCAGCGAC  
TAGGACATGCCTTCCAGTCTATAAGCCACGCATTCCAAGTGGATCCCTCCC  
TATAGGTCAGAAACCTCAACAGCGCCATCTCTCATNNNNNNNNNCAGTTCCCTCAAAC  
TGACCTCTCTGGGTTTCATCATTGGAGTCCGGTGTGGTAGGGAACTCCTG  
ATCTCCATCTTGCTGGTTAAAGACAAGAGCCTGCATCGAGCACCTACTA

TTTTTTGCTGGATCTGTGCGCCTCTGACATCCTGCGCTCTGCCATCTGCT  
TCCCCTTTGTCTTCACCTCAGTAAAGAATGGTTCTGCCTGGACCTACGGC  
ACACTGACCTGCAAAGTGATTGCCTTCCTGGGTGTGCTTTCGTGTTCCA  
CACAGCATTCATGCTGTTCTGTGTCAGCGTCACCCGCTACCTGGCCATTG  
CTCATCACCGTTTTCTACACCAAGAGGCTGACTTTCTGGACGTGTCTTGCG  
GTCATCTGCATGGTGTGGACGTTGTCAGTGGCTATGGCGTTCCCGCCTGT  
GCTCGATGTAGGGACGTACTCATTTATCCGGGAGGAGGACCAGTGCACGT  
TTCAGCACCGTTCCCTCAGGGCGAATGATTTCGCTGGGCTTCATGCTACTG  
CTGGCGCTCATCCTCCTGGCCACACAGCTGGTTTACCTCAAACCTCATTTT  
CTTCGTCCATGACCGTCGAAAGATGAAGCCTGTCCAGTTCGTGCCTGCCG  
TTAGCCAGAACTGGACCTTCCACGGACCCGGCGCCAGTGGACAGGCGGCG  
GCTAACTGGCTGGCTGGATTTGGTCGAGGCCCCACCCCGCCTACTTTGCT  
GGGCATCCGACAGAACAGCAATGCAGCAGGCCGAGGCGTCTACTTGTAT  
TGGATGAATTCAAAACGGAGAAGAGGATTAGTAGGATGTTCTACATCATG  
ACGTTTTTCTTCCCTGGCTTTGTGGGGGCCCTACCTGGTCGCCTGCTACTG  
GCGAGTGTGTTGCAAGGGGCCCGTGGTCCCTGGAGGCTACCTGACAGCAG  
CTGTGTGGATGAGCTTTGCCAGGCTGGGGTCAACCCTTTTATCTGCATC  
NNNNNNNNNNNNNNNGCCAAAACCTCGCTTTCACCCCTGGCATGGGGACTGGTCCCTGGCACGGAGC-  
--GCAGCGTCCCACTCGGCAACAGCTTGCTGTCCCCGCAGCAAACCGAGG  
AGCCCACTGTTGCCACCCCCCGCAGCGATGGTTTGTACCC---CTGCC  
AACAACCGACTGGACTTTGCAGCCTCGGCATACGACGCCGCC-----  
-GATTTCCGCGGTAACGCAGCCACCTTGCTGTCCCTACGCAGCGGCCGGAG  
TGAAAGCTC-----TTCCCCTGCCGACTGCGGGCTGCTCCAACCGGCCT  
CTTGGCTATTACGCAGACCCGCTCTG---GCTGG---GGAGGACGCACGCC  
GCCGCAATACTGCGGCGTAAATAGTAAATCCAGCTCGGTGTTTTCTGCT  
GGCCTGCCAACTCCATCGGTGGCAGAGCCGGCA---CC---AACTACCTG  
T-----CCGAGGA---GGGA---GAGTC---CCTCGCCACGGAGAG  
GTCGCC---AT---CGGCGGCTCGGAGGAG---ACAAAAGCCAAGGACA  
TGAC---ATCCGA---GTCGAGCTGGATAGAG---ACGCCGTATCCATT  
AAGTCCATCGATTGAGCGATTCTGGGATCTTTG---AGCAAGCCAAACG  
GAGAAGAATCTCACCTTCTGCCACACCG-----GTTTCAGAGACAG  
TGTCCCCGCTAAAATCCGAGCATCACTCAACAGGCGAAGTCACAGAGAGA  
GAAGTGGCGCTGGGGATAAACCCTGTCGCGGATGGGATGGGCGCCTTCAA  
AATAAACACAGCTCCCACGACATCGGCTCCGG---ACAGACGGCGTTCT  
CCTCCCAGGCG---CCCGGCTAC---GCGGCGGCGGCYCTGGGA---CAC  
CACCA-----CCACCCGACCCACGTTGGCTCC---TACTCCACGGCGGC  
GTTCAACTCCACCAGGGACTTTCTTTTCAGAAACAGGGGCTTTGGGGATG  
CCGCCG-----GGCGCAGCACAGCCTGTTTGCCTC-----  
--CGGAAGTTT---C-----GCAGGGCCACATGGACACTCAGATGCGGC  
GGGGCACCTGCTCTTCCCGGACTCCACGAG---CAAGCAGCCAGCCACG  
CATCTTCCAACGTGGTCAACGGTCAGATGAGGCTGGGCTTCTCGGGGGAC  
ATGTACGGGCGGGCCGAGCAGTACGGCCACGTTACAAGCCCACGAT---C  
CGACCACTATGCTTCCACTCAGCTGCACGGCTACGGCCCCATGAACATGA  
ATATGGCCGCG---CACCACGGAGCGGGGCCTTCTTCAGATACATGAGG  
CAGCCCATCAAACAGGAGCTCATCTGCAAGTGGATCGAGCCGGAGCAGCT  
GACGAATCCAAAAAGTCGTGCAACAAAACCTTTCAGCACGATGCACGAGC  
TCGTGACCCACCTGACTGTTGAGCATGTGGGGGGACCGGAGCAGACCAAC  
CACGTCGCTTCTGGGAGGACTGCTCCAGAGAAGGGAAGCCCTTCAAAGC  
CAAATACAACTCGTGAATCATATCAGAGTACACACCCGGAGAAAAACCCT  
TTCCGTGTCCGTTTCCCTGGTTGTGGCAA  
>Xenodermichthys copei  
AGCCTTCTAATCCGCGCCGAGCTATCGCAACCGGGTGCCCTTCTAGGCGA  
TGATCAAATTTATAATGTCATCGTTACAGCACACGCCTTCGTAATAATCT









-----  
-----GAAGTCAC  
AGACAGAGAAGTGGCTTTGGGGATAAATCCGTTGCGCGACGGGATGGGCG  
CTTTCAAATCAACCACAGCTCCCACGATCTTGGCTCGGG---GCAAACG  
GCGTTTGCCTCGCAGGCG---CCCGGTAC---GCAGCCGCTGCCCTGGG  
A---CACCATCA-----CCACCCTACCCATGTCAGCTCC---TACTCCA  
CCGCGGCGTTCAATTCTACCCGGGACTTTCTCTTTCGGAATCGGGGATTC  
GGAGACGCCACTAG-----CGCGCAGCACAGTCTCTTCGCCTC  
AGC---TGCGGGAAGTTT---C-----GCAGGGCCACATGGACACACCG  
ATGCCACGGGACACCTGCTCTTCTCGGGACTGCACGAG---CAAGCGGCG  
ACCCACGCGTCTTGAACGTGGTGAACAGTCAGATGCGCCTGGGCTTTTC  
GGGGACATGTACGGCAGAGCCGAGCAGTACGGTCATGTAACGAGCCCC  
GGT---CCGAGCACTACGTTTCGACTCAGTTGCACGGCTATGGCCCTATG  
AACATGAATATGGCTGCC---CATCACGGGGCAGGGGCCTTCTTCCGTTA  
CATGAGGCAGCCGATCAAACAAGAGCTCATCTGCAAGTGGGTGCAACCAG  
AGCAGCTGTGCAATCCGAAAAAGTCTGCAACAAAACTTTCAGCACGATG  
CACGAGCTCGTGACCACCTCACGGTGGAAACAGTCGGGGGACCGGAACA  
GTCGAATCACATTTGCTTTTGGGAAGAGTGTCCGCGAGAAGGGAAACCGT  
TTAAAGCCAAGTACAAACTTGTAATCATATTAGAGTGCACACCCGAGAG  
NNNNNNNNNNNNNNNNNNNNNNNNNNNNNNNNNNNNNNNNNNNNNNNNNNNN

>Xiphias gladius

-----  
-----  
-----  
-----  
-----  
-----  
-----  
-----  
-----  
-----  
-----  
-----  
-----  
-----  
-----  
-----  
-----  
-----  
-----  
-----  
-----  
-----  
-----

-----NNNNNNNGAGAAACCTTACCCTTCTAACTGTCTTGGCATGCTGT  
TGCTGTCCGACGCCACCAGTGCACCAAGCTGTCAGAGCTCTCCTGGGGC  
ATGTGCCTCAGCAATTTCCCTGCTATTTGCAAGACAGAGGACTTCTCCA  
ACTGCCCAAAGATATGGTGGTGCAGCTTTTGTGCGCATGAGGAGCTAGAGA  
CGGAAGATGAGAGACTGGTTTTATGAAGCTGCCCTTAACTGGATCAATTAT  
GACCTGGAAAGGAGGCATTGCCACCTTCCAGAGCTTCTGAGAACGGTCCG  
CCTCGCCCTGCTACCTGCCATCTTCTGATGGAGAATGTCTCGACAGAAG  
AGCTGATCAACGCCCAGGCCAAGAGCAAGGAAGTGGTGGATGAAGCCATC  
CGCTGTAAGCTGAAAATCCTGCAGAAAGTGCAGGCGTTGTTAACAGCCCGTG  
TGCTCGACCAAGAAAACCAGCCATGCCCTCTTCTTCTGGGAGGGCAGA  
CTTTCATGTGTGACAAGTTGTACCTGGTGGACCAGAAGGCCAAAGAGATC  
ATCCCCAAAGCTGACATCCCAAGCCCCAGGAAGGAGTTCAGCGCCTGCGC  
CATCGGCTGCAAGGTGTACATCACTGGTGGGA--GAGGCTC-AGAGAACG  
GTGTGTCCAAAGATGTATGGGTGTACGACACCGTCCACGAAGAATGGTCC  
AAAGCAGCTCCCATGCTCATCGCCAGGTTTGGCCATGGCTCTGCGGAGCT  
GAAACACTGCCTTTACGNNNNNNNNNNNNNNNNNNNNNNNNNNNNNNNNNNNTGA

TGATTACATTGTTGTTTTTCAGTCGTTCAAC  
AACAAAGGCTGATACTTAACGAAGCAGAGCTTATCATGGTGTGGCCAGG  
AGTTCCAGATGAGAGTGGTCACACTATCCCTGGAGGAACAGTCTTCCCT  
AGTATCGTCCAGGTGATCAGTGGTGTTCATGTTAGTCAGCATGCACGG  
AGCTCAGCTTATCACCTCACTCTTCCCTCCCAGAGGAGCTGCTGTGGTGG  
AACTGTTCCCTTTGCTGTGAACCCAGAGCAGTACACACCATATAAAACC  
CTTGCCCTCCCTTCCAGGCATGGACCTTATTATATCTCCTGGAGGAACAC  
TAAGGAGGAAAACACGATCACTCACCCAGACAGACCCTGGGAACAAGGAG  
GCATTGCTCACTTGGAGAAGGAGGAGCAGGAGCGAATACTGGCCAGTAAG  
GACGTCCCTAGGCACCTGTGCTGCCGCAACCCAGAGTGGCTTTTCCGGAT  
CTACCAGGACACTTTGGTGGACATCCCTTCTTTCTGGAAGTCATCAA--  
-AGAGGGCATGAAG---ACCAAGCCCAGCTTGAAGAA---GTCAAAACCG  
GCCAGCACTGTCCACCCAGGCCGAGTCAGAGAACCCTAAATGTCAGACCTC  
AGTACAAAACCAATAATGAGGCTAAACTCACAGTCTCCTGGCAGATCCCCT  
GGAATCTGAAATACCTGAAGGTAAGAGAGGTGAAGTATGAGGTGTGGATC  
CAGAAAAAAGACACCAGCAAGGGGACGCTTGAGGATCAAATCATCCAGGC  
GAACCTGCGCTGGAGGCATTCCGGCAACGCCAAAAACATTAAGAAACGACA  
ACTCGTCTCGTTTTGGAAAATTCATTTCGAATTCACCTCGGTACGAGTGGC  
AAACTGTCTCTGCCGAYATTGAGACGTACCTGCTGGAGAAGTCACGTGT  
CACCTTTCAGCTCAAGGCTGAGAGGAACCTACCACATCTTCTACCAGATCC  
TGTTCAATCAGAAGCCAGAGCTTCTGGACATGCTGCTGATCACCAACAAC  
CCGTACGACTACTCCTACATCTCCAAGGAGAGGTAACAGTCGCCCTCCAT  
CAACGACTCGGAGGAGCTGATGGCCACCGACAGCGCTTTTGATGTGCTCG  
GTTTTACTCCAGAGGAGAAGATGGGCGTCTATAAACTGACTGGTGCCATC  
ATGCACCTACGGCAACATGAAGTTCAAACAGAAGCAGCGGGAGGAGCAGGC  
TGAACCTGATGGGACGGAGGCTGCTGATAAATCAGCTTACCTAATGGGGC  
TGAACCTGTCAGACCTCATCAAAGGCCTGTGCCATCCAGAGTCAAGGTA  
GGAAATGAATATGTTACCAAAGGCCAAAGTGTGGACCAAGTCTACTACCC  
CAACAAGGAGGCCTTTAAATGTGAGGAGTGTGGGAAGCACTACAACACCA  
AGCTGGGATATAAGCGCCATGTGGCCATGCACTCTGCCACAGCAGGGGAT  
CTCACCTGCAAAGTGTGCATGCAGAGCTATGAGAGTACACCTGTCTCCT  
GGAGCACCTCAAGGCCACTCTGGGAAGTCTTCGGGTGGTGCCAAGGAGA  
AAAAACACCCGTGCGACCACTGTGACCGTTCGTTTACACACGGAAGGAT  
GTGAGACGGCACATGGTGGTCCACACGGGCCGAAAGGACTTCTGTGCCA  
GTACTGTGCCAGCGCTTCGGCAGGAAGGACCACCTGACACGGCACGTGA  
AGAAGAGCCACTCACAGGAGCTGCTGAAGATCAAGACGGAGCCTCCGGAT  
ATGTTAGGTCTTTTAGCTTCTGGATCCCCACCTTGCTCTGTGAAAGAGGA  
GCTCAGCCCCATGATGTGCGGCATGGGTCCCAACAAAGACCCCATGATGG  
GCAAACCTTTCCCTAGTGGGGCCCCCTTTCCAATGGGCATGTACAACCC  
CACCAT-----CTCCAGGCATGTCCAATACTGGGGTGGGTCACCCA--  
----CACCCGTCCCTAATGCCAGTTCCTTGTCTGCAGCTATGGGCATGG  
GCTGTCACATGGAATATCTCATCTACGCCTCTTTCATTTCATGGGATGC  
TTACAAATCAGTGATGGATCAAATATCGTCAACCTGCTGGCTAGTAACTC  
TCCGAGTGTTTTCGTATGCTCTGACCCAGCAGAAATACTTCAGTAACTACA  
GTCTGTGATCGGGTTTTACATTTACGAGCCCATCGATTACTGGAACCTCC  
ACGGTGCAGGACCACCTTAAGACTCTGAGTCATGGCTTCAACAAGATCTC  
CTGGATGGACAACCTTTTCCATTACCTGCGGGTGGTGAATGTGAGTGCAT  
CAACCAAGAGTGACTTCATCACCATCCTTAAAGGCTCTTTCCTGCGCAGC  
CCAGAGTACCAGCACTTCACTGAGGACATCATATCTCCAAGA---ATCG  
TGAGACTG-----ACGAGTACGATATTATTGCCTCACGGTTGTACTTGG  
TGGCGCGGACGACTGAGAAGAAGCGAGAAGAGGTGGTTGAGCTATTGGAA  
AAGCTTCGTCCATTGATGCTAATCAACAGCATCAAGTTCATTGCCTTCAA  
TCCCACATTTGTGTTTCATGGACCGCTACAGCTCCTCTGTAATCTCACCCA

TTCTCACCTCAGGCTTCAGCATACTCACTATGCTCATTCTCACTTTTTTC  
CTGGTCATCAACCCCTTGGGGAACCTCTGGCTCATCCTCACGGTTACGTC  
TGTAGAGCTGGGCGTCTTGGGTTTGATGNNNNNNNNNNNNNNNNNNNNNNNNNNNNNNNNNNNNGAG  
TGTCACCTTTGCAATGTTG  
GCATTATTAATGGGCTCTCTGGATGGGCTTCCTTGGTGGATGAACCCCT  
GCTGACACCATCACTCGGCGGTTTCGATATGATGTAGCTCTGGTGTGAGC  
ATTAAGGATCTGGAGGAGGACATCATTGAGGGCTGAGAGAGAGTGGGA  
TGGAAGACAGTGTCTGCACTTCAGGCTTTACTGTCATGATCAAGGAATGT  
TGTGATGGCATGGGCGATGTCAGCGAGAAGCACGGTGGAGGACCAGCTGT  
TCCCGAGAAGGCTGTGCGTTTTCTCTTCACTGTTATGTCTGTCTCTGTCC  
AAGCAGACGATGAGGAG-----GAG  
GAGGTTACCATCTTCACTGAGCCAAAACCAAACCTCAGAAGTGTCTGTAA  
GCCCCTTTGCCTGATGTTTGTGGATGAGTCAGACCATGAGACGCTCACAG  
CTGTCTGGGGCTATAGTTGCAGAGCGTAATGCGATGATAGAGAGCAGG  
CTCATCCTGTCCATGGGCGGCTGCTTCGCTCCTTCCGCTTCCGCTTCAG  
AGGCACGGGATACGATGAGAAGATGGTGCAGAGATGGAAGGCTGGAGT  
CCTCGGGTTCCACATATATCTGCACTCTGTGTGACTCCACTCGGGCAGAG  
GCCTCTCAAAACATGGTGTACTACTCCATAACCCGCTGTCATGAAGAGAA  
CCTGGAACGTTACGAAATATGGAGATCCAATCCCTTCTCTGAGTCTGTAG  
ACGAGCTGCGAGACAGAGTCAAAGGGTCTCTGCCAAGCCCTTCATGGAG  
ACCCAGCCCACACTAGATGCATTACACTGTGACATTGGCAATGCCACTGA  
GTTCTACAAAATCTTCCAGGACGAGATTGGGGAGGTGTACCAAAAGGT--  
-CAAC--CCTAGCCGGGAAGAGCGGCGCAGCTGGAGGGCAGCCCTAGAT  
AAAGAGCTGAGGAAGACGATGAAGCTTAAACCGGTAATGAGGATGAATGG  
GAACTATGCCCGCAGGCTAATGACCCTGGAAGCTGTGGAGGTGGTATGTC  
AGCTGGTGCCTTCAGAGGAGCGGAGGGAGGCCCTGAGGGAGCTTATGAGG  
CTCTACCTCCAGATGAGGCTGTGTGGCGGCCACCTGCCAGCCAAAGA  
ATGCCCTGACCAGCTGTGCCGCTACAGCTTTAACTCCAGCGCTTTGCCG  
ACCTCCTCTCCTCTACCTTCAAATACAGGTACAACGAAAGATAACCAAT  
TACCTTACAAAGACCCTGGCCCATGTGCCNNNNNNNNNNNNNNNNNNNNNNNNNNNNNNNNNNNN  
NNNNNNNNNNNNNNNNNNNNNNNNNNNNNTCGTACACCATTGAGATGGGT  
CCCTTGGGGCCCCGGTGAAGGAGAACCACAGCCTTTCTCCTGCTCCAT  
TGAAGACCCACAAAACAGACAAAGTTCAAGGGCATCAAGACCTACATTT  
CGTACCGGGTCACGCCGAGTCACACAGGGCGTCCCGTCTACAGGCGTTAC  
AAACACTTTGACTGGCTGTACAACCGCTTACTGCACAAGTTCACTGTGAT  
CTCTGTGCCTCACCTGCCTGAGAAGCAGGCTACGGGGCGATTTGAGGAAG  
ACTTCATCGAGAAGCGTAAGAGACGACTGATACTGTGGATGAACCACATG  
ACCAGTCACCCAGTCTTTCCAGTATGAAGGCTTTGAGCACTTTCTGAT  
GTGTGCTGACGACAAGCAGTGGAAACTGGGAAAGAGACGGGCTGAGAAGG  
ACGAGATGGTGGGCGCCATTTTCATGCTGACCCTCCAGATCCCTAACGAG  
CACCAGGACCTTACAGGACGTAGAGGAGCGGGTTGACTCCTTCAAGTCCTT  
TGCTAAAAAATGGACGACAGCGTGATGCAGCTCACACATGTTGCCCTCAG  
AGCTGGTGCCTAAACACCTAGGTGGGTTTCCAGGAAGGAGTTTCCAGCGGCTG  
GGAATGCTTTCCAGTCTATCAGCCAGGCATTCATGCTGGACCCTCCCCA  
CAGCTCAGACACCTTCAACAACGCCATATCCCATNNNNNNNNNNNNNNNNNNNNCAAACCTGACCTCTCTG  
GGTTTCATCATTGGAGTCGGTGTGGTTGGAAACCTCCTGATCTCCATCCT  
GCTGGTCAAAGACAAGAGCCTGCACCGAGCGCCCTACTATTTCTCTGCTGG  
ACCTGTGTGCCTCTGATATCCTGCGCTCTGCCATCTGCTTCCCTTTGTC  
TTCACCTCGGTCAAGAAATGGATCTGCCTGGACCTATGGCACGCTGACCTG  
CAAAGTGATCGCCTTCCCTGGGTGTGCTCTCCTGTTCCACACGGCGTTCA  
TGCTATTCTGTGTGCTGACTCGCTATCTGGCCATCGCACATCACCGT  
TTCTACACCAAGAGGCTGACCTTCTGGACCTGTCTGGCTGTGATCTGCAT  
GGTGTGGACGTTGTCAGTGGCCATGGCATTCCCGCGGCTGCTAGACGTAG

GGACGTACTCTTTTCATCCGGGAGGAGGACCAGTGCACATTCCAGCACCGT  
TCCTTCAGGGCAAATGATTTCGCTGGGCTTCATGCTCCTGTTGGCTCTCAT  
CCTCCTGGCCACACAGCTGGTTTACCTCAAGCTCATCTTTTTTTGTCCACG  
ACCGTCGAAAGATGAAGCCTGTACAGTTCGTGCCTGCTGTGAGCCAGAAC  
TGGACCTTCCACGGGCCAGGCGCCAGTGGTCAGGCGGCAGCCAACTGGCT  
GGCTGGATTTGGTCGAGGCCCCACCCACCTACTTTGCTGGGCATCCGGC  
AGAATAGCAACGCAGCGGGCCGAGGCGTCTACTGGTATTGGATGAATTC  
AAAACGGAGAAGAGGATTAGTAGGATGTTCTACATCATGACGTTTTTCTT  
CCTGGCACTGTGGGGGCCCTATCTGGTTGCCTGCTACTGGCGGGTGTG  
CAAGGGGCCCGTAGTCCCTGGGGCTACCTGACGGCAGCCGTGTGGATG  
AGCTTTGCCAGGCTGGGGTCAATCCTTTTCATCTGCATNNNNNNNNNNNNNNNNNGCCAAATCTCGC  
TTTCACCCTGGCGTGGGGACTGGTCTGGCACGGAGC---GCAGCGTCCC  
ACTCGGCAACAGCTTGCTATCCCCGCAGCAAACCGAGGAGCCCACTGTTG  
CCACCCCCCGCAGCGATGGTTTGTACCC---CTGCCAACAAACCGACTG  
GACTTTGCTGCCTCGGCATACGACGCCGCC-----GATTTTCGCCGG  
TAACCGCGCCACCTTGCTGTCTACGCAGCGCCGGAGTGAAGGCTC---  
---TTCCCTGCCGACTGCAGGCTGCTCCAACCGGCTCTTGGCTATTAC  
GCAGACCCGTCAG---GCTGG---GGAGGACGCACGCCCGCCGAGTACTG  
TGGCGTGAATAGCAAATCCAGCTCGGTCTTTTTCCTGCTGGCCCGCTAACT  
CCATCGGTGGCAGAGCGGGCA---CC---AACTACCTGG-----GC  
GAGGA---GGGA---GACTC---TATCCCGACAGAGAGATCACCG---AT  
---CGGCGGCTCGGAGGAG---ACCAAACCAAGGACATGAC---ATCTG  
A---GTCGAGCTGGATAGAG---ACGCCGTCTCCATTAAGTCCATCGAT  
TCAAGCGATTCCGGTATCTTTG---AACAGGCCAAAAGAAGGCGAATCTC  
ACCTTCTGCCACGCCG-----GTTTCAGAGACAGTGTCCCGTTAA  
AATCGGAGCATCACTCAACAGGCGAAGTACAGAGAGAGAAGTGGCGTTG  
GGGATAAATCCATTTCGCGGATGGGATGGGCGCCTTCAAATCAACCACAG  
CTCCCACGATATCGGCTCCGG---ACAGACGGCGTTTTCTCCCAGGCG-  
--CCCGGCTAC---GCAGCAGCCGCCCTGGGA---CACCATCA-----C  
CACGCGACCCACGTTGGCTCT---TACTCCACCGCGGCTTTCAACTCCAC  
CAGGGACTTTCTCTTCAGAAATCGGGGTTTTCGGGGACGCCACCGG-----  
-----GGCGCAGCACAGTTTTGTTTCGCTC-----TGGAAGTTT-  
--C-----GCAGGGCCACATGGACACTCAGATGCAGCGGGTACCTGCT  
CTTCCCAGGGCTCCACGAG---CAAGCGGCAGCCATGCCTCTTCCAACG  
TGGTCAACAGCCAGATGCGGCTGGGCTTCTCGGGGACATGTACGGACGG  
GCMGACCAGTATAGCCACGTTACAAGCCACGGT---CCGACCACTATGC  
YTCGACCCAGCTGCACGGCTATGGCCCCATGAACATGAATATGGCCGCA-  
--CACCACGGTGCAGGGGCCCTTCTTTCGGTACATGAGGCAGCCCATCAA  
CAAGAGCTCATCTGCAAGTGGATCGAGCCGGAGCAGCTGACAAATCCCAA  
AAAGTCGTGTAACAAAACCTTTTAGCACGATGCACGAGCTTGTGACCCATC  
TGACGGTGGAGCATGTGGGGGGACCAGAGCAGACCAACCACGTCTGCTTC  
TGGGAAGATTGCTCCAGAGAAGGAAAGCCTTTCAAAGCCAAATACAACT  
TGTAATCATATCAGAGTACACACCGGAGAAAAGCCCTTTCCGTGTCCGT  
TCCCCGGCTGTGGCAA

>Yarrella blackfordi

AGCCTGCTTATCCGAGCGGAGTTAAACCAACCCGGTGCCCTTCTAGGCGA  
CGACCAAATTTATAATGTCATTGTTACGGCACATGCCTTCGTAATAATTT  
TCTTTATAGTAATAACCAATTATAATCGGAGGCTTTGGAACTGACTAATT  
CCTCTCATAATTGGCGCCCCCGACATAGCATTCCCCGAATAAACAACAT  
AAGCTTTTGGCTCCTCCCTCCCTCCTTTCTTCTCTACTTGCTCCTCCG  
GAGTTGAAGCCGGGGCCGGAACCTGGCTGAACAGTCTACCCCTCTCGCC  
GGCAATTTAGCCCACGCAGGAGCTTCGGTCGACCTGACCATTTTCTCCCT  
CCATCTTGACAGGAGTTCTTCAATCCTCGGATCAATCAACTTTATTACCA

CTATTATTAATATAAAAACCCCCAGCCATCTCCCAATATCAGACACCCCTC  
TTCATCTGAGCCACTCTTGTTACCACTGTTCTTCTTCTTTTGTCCTCCC  
GGTTCTAGCTGCTGGAATTACTATGCTTCTAACAGACCGAAACCTAAACA  
CAACCTTCTTCGACCCGGCAGGGGGAGGAGACCCATTTCTCTACCAACAC  
CTTTTCTGATTCTTTGGGCACCCGGAAGTATATATTTCTAATTCTTCCAGG  
CTTCGGCATAAATTTCCCATATTGTCGCCTATTATTCAGGAAAGAAAAGAGC  
CCTTTGGTTATATGGGGATGGTCTGAGCTATAATAGCCATCGGACTTCTA  
GGCTTTATTGTTTGGAGCCATCACATGTTTACAGTCGGAATAGATGTAGA  
CACCCGAGCCTA---CTGGAGAGGAACCTGCACCCGTCCAACCTGTCG  
AATGCTGCTCCTCTCAGACGCCACCAGTGCRCOAAGCTGTCGGAGCTGT  
CCTGGGGCATGTGCCCTCAGCAACTTCCCCGCCATCTGCAAGACGGAGGAC  
TTCTTGCAGCTGCCCAAAGACATGGCGGTCCAGCTGCTGTCCCACGAGGA  
GCTGGAGACGGAGGACGAGAGGCTGGTCTACGAGGCCGCCCTCAACTGGG  
TCAACTACGACCTGGAGAGGCGGCCTGCCACTTGCCAGAGCTGCTGAGA  
ACCGTTCGTCTGGCCCTGCTGCCCGCCATCTTCCCTCATGGAGAACGTCTC  
CACGGAGGAGCTGATCAACGCCAGACCAAGAGCAAGGAGCTGGTGGACG  
AGGCCATCCGCTGCAAGCTGAGGATCCTGCAGAACGAGGGCGTGGTCAAC  
AGCCCGCTGGCCCCGGCCAGGAAGACCAGCCACGCCCTCTTCCCTGCTGGG  
CGGGCAGACCTTTCATGTGTGACAAGCTGTACCTGGTGGACCAGAAGGCCA  
AGGAGATCATCCCCAAGGCGGACATCCCCAGCCCCAGGAAGGAGTTCAGC  
GCCTGTGCCATCGGCTGCAAGGTCTACATCACCGGAGGCA--GGGGCTC-  
TGAGAACGGGTCTCCAAAGATGTTTGGGTCTACGACACGTCTCATGAGG  
AGTGGTCGAAGGCGGCTCCCATGCTCATCGCCCCGTTTCGGCCACGGTTCT  
GCAGAACTCAAACACTGCCTCTACGTGGTGGGCGGACACACGGCCGGCAC  
GGGCTGCCTCNNNNNNNNNNNNNNNN--

-----  
-----  
-----  
-----  
-----  
-----  
-----  
-----  
-----  
-----  
-----  
-----  
-----  
-----  
-----  
-----  
-----  
-----  
-----  
-----  
-----  
-----

-----AAGA  
GGGATACCAGCAAGGGAACCTTGGAGGATCAAATCATCCAGGCTAACCT  
GCCCTGGAGGCTTTCGGTAACGCCAAAACATTGAGAAATGACAACTCGTC  
ACGCTTTGGCAAATTCATCCGGATTCACCTTGGAAAAGTCACGTGTACCTT  
CCTCTGCAGACATAGAGACTTACCTTCTGGAAAAGTCACGTGTACCTT  
CAGCTCAAGTCAGAGAGGAACCTACCATATCTTCTTCCAGATCTTGTCCAA  
TCAAAAGCCAGAGCTGTTGGACATGCTTCTAATCACCAACAATCCATATG  
ACTACTCCTACATCTCCCAAGGAGAGGTAACAGTAGCATCCATCAACGAT  
TCTGAGGAGTTGATCGCCACTGACAGTGCATTTCGATGTGCTTGGCTTAC  
TCAAGAGGAGAAAATGGGGGTCTACAAGTTGATAGGTGCAATCATGCATT  
ACGGCAACATGAAGTCAAGCAGAAGCAGCGGAGGAGCAGGCAGAGGCT  
GACGGCACCCGAGGCTGCTGACAAGTCAGCTTACCTAATGGGGCTGAACTC  
TGCAGATCTAGTGAAGGACTGTGCCATCCCAGGGTTAAGGTTGGCAATG  
AGTTTGTCACTAAAGGGCAGGGTGTAGACCAAGTCTACTAC-----  
-----







CAACACAGTCTCTTCGCATCCGC---AGCGGGAAGTTT---T-----GC  
AGGGCCACATGGACACTCAGATGCCGCGGGACACCTGCTCTTCCCAGGAC  
TTCACGAG---CAAGCCGCAAGCCATGCGTCCTCAAATGTTGTTAACAGT  
CAGATGCGGTTGGGCTTTTTCGGGGACATGTACGGGCGGGCCGACCAGTA  
TGGCCACGTTACCAGCCCGCGGT---CCGACCACTATGCTTCGACCCAGT  
TGCATGGCTATGGCCCTATGAACATGAATATGGCCGCA---CATCATGGA  
GCAGGGGCCTTCTTCCGTTACATGAGGCAGCCGATAAAACAAGAGCTGAT  
CTGCAAGTGGATCGAACCAGAGCAACTAACGAATCCGAAAAAGTCGTGCA  
ACAAAACTTTTAGCACGATGCACGAGCTGGTGACCCATTTGACGGTGGAA  
CATGTGGGGGGACCGGAGCAGTCGAACCATATTTGCTTCTGGGAAGAGTG  
TGCCCGAGAAGGAAAACCATTCAAAGCCAAATACAAAACCTTGTGAACCACA  
TCAGAGTGCACACCGGAGAG-----

>*Zanclus cornutus*

AGCCTTCTAATTCGGGCTGAACTCAGTCAACCGGGAGCCCTTCTAGGGGA  
TGATCAAATCTATAACGTAATTGCAACTGCACATGCGTTTTGTAATAATTT  
TCTTTATGGTAATGCCGATTATAATCGGAGGGTTTCGGAACTGACTAATC  
CCACTTATGATTGGGGCCCTGATATGGCATTCCCCCGTATAAAATAATAT  
GAGCTTTTACTCCTGCCTCCTTCCCTCCTCCTCCTGGCTTCCCTCTG  
GTGTTGAAGCAGGGGCGGGACAGGGTGAACAGTCTACCCGCCTCTGGCT  
GGCAACCTAGCACATGCGGGAGCCTCTGTTGATTTAACCATCTTTTCTCT  
GCACCTCGCAGGTATTTCTTCAATTTTAGGGGCCATTAATTTTATCACA  
CCATTATCAACATGAAACCTCCCGCTATTTCCCAATATCAAACCCCTTTA  
TTTGTATGAGCAGTCTTAATCACTGCCGTCTCCTTCTTCTCTCCCTCCC  
AGTGCTCGCCGCCGTATTACTATGCTCCTCACAGACCGAAATCTAAATA  
CTACTTTCTTTGACCCTGCAGGAGGAGAGACCCCATCCTCTACCAGCAC  
CT-----

-----TTCCTAGAGAGAAACCTTACCCAACCTAACTGCCTTGG  
CATGCTGTTGCTGTCTGATGCCACCAATGCACCAAGCTGTCAGAGCTCT  
CCTGGGGAATGTGTCTCAGCAACTTTCCCGCTATTTGCAAGACAGAGGAT  
TTCTCCAGCTGCCCAAAGATATGGTGGTGCAGCTTCTGTCACATGAGGA  
GCTAGAGACAGAAGATGAGAGACTGGTTTACGAAGCTGCCCTCAATTGGA  
TCAACTATGACCTGGAAGAGGCACTGCCACCTTCCAGAGCTCCTGAGA  
ACRGTCGACTGGCCCTGCTGCCTGCCATCTTTCTCATGGAGAACGTTTC  
TACAGAAGAGCTGATCAATGCCAGGCCAAGAGCAAGGAGCTGGTGGATG  
AAGCCATCCGCTGTAAGCTGAAGATCCTGCAGAAATGATGGTGTGCTTAAC  
AGCCCGTGTGCTCGACCAAGGAAAACCAGCCATGCCCTCTTTCTCTGGG  
AGGRCAGACTTTCATGTGTGACAAGTTGTACCTGGTGGACCAGAAAGCAA  
AAGAGATCATCCCCAAGGCTGACATTTCCAGCCCCAGGAAGGAGTTCAGC  
GCCTGCGCCATCGGCTGTAAGGTGTACATCACTGGTGGAA--GAGGCTC-  
AGAGAATGGTGTGTCCAAAGATGTATGGGTCTACGACACYGTCCAYGAGG  
AATGGTCAAAGGCGGCACCCATGCTCATTGCCAGGTTTGGCCATGGCTCY  
GCAGAGCTGAAACACTGCCTCTATGTGGTAGGAGGTCACACCGCCGCAAC  
TGGCTGCCTCCCGCCTCCCCGTCTGGATGAATACATTTGTTGTGTTAGT  
CGTTCACAACAAGACTGATCCTGAATGAAGCGGAGCTGATCATGGCGCT  
GGCCAGGAGTTCCAGATGAGAGTGGTCACCGTATCCCTGGAGGAACAGT  
CTTTCCCCAGTATCATTCAGGTGATCAGCGGTGCTACCATGTTAGTCAGT  
ATGCATGGAGCTCAGCTTATCACCTCACTCTTCCCTCCCCAGAGGGGCTGT  
TGTGGTGGAGCTGTTCCCTTTGCTGTGAATCCAGAGCAGTATACTCCAT  
ATAAAACCTTGCCTTTCTTCCAGGCATGGACCTTCACTATGTCTCCTGG

AGGAACACTAAGGAGGAGAACACTGTCACCCACACAGACAGACCCTGGGA  
ACAAGGGGGCATCGCTCACTTGGACAAGGAAGAGCAAGAGCGAATACTGG  
CGAGCAAAGATGTCCCAGGCACCTGTGCTGCCGCAACCCAGAGTGGCTC  
TTCAGGATCTATCAGGACACTTTGGTGGACATCCCCCTCTTTTCTGGAAGT  
CCTCAA---AGAGGGCATGAAG---ACAAAGCCCAGCTTGAAGAA---GT  
CAAAGCCAGCCACCACAGTCCACCCGGGCGGGTCAGAGAACCCAGTGT  
CAGACCTCAGTACAAACACTAATGAGGCTAAACTCACAGTCTCCTGGCA  
GATCCCATGGAATCTGAAATACCTGAAGGTGAGAGAGGTGAAATATGAGG  
TGTGGATCCAGAAAAAGACTCCAGCAAGGGGACACTGGAGGATCAAATC  
ATTCAGGCGAACCTGCACTGGAGGCCTTCGAAAACGCAAAAACATTAAG  
AAATGACAACCTCATCTCGGTTTGGAAAATTCATCCGTATTCACCTTTGGTA  
CGAGTGGCAAGCTGTGCTGCTGACATCGAGACATACCTGCTGGAGAAG  
TCACGTGTTACCTTTCAGCTCAAGGCTGAAAGGAATTATCACATCTTCTA  
CCAGATCCTGTCAAAATCAGAAGCCAGAGCTGCTAGACATGCTGCTGATCA  
CTAAACAACCCATACGATTACTCCTACATCTCACAAAGGAGAGGTTACAGTC  
GCTTCCATCAATGACTCTGAGGAACTGATGGCCACAGACAGCGCCTTTGA  
TGTGCTCGGCTTACCACAGACGAGAAGATGGGTGTCTACAAATTGACAG  
GGGCCATCATGCACTATGGCAACATGAAGTTCAAAACAGAAGCAGCGTGAG  
GAGCAGGCTGAACCGGATGGGACGGAGGCTGCTGATAAATCAGCTTACCT  
AATGGGGCTGAACTCTGCTGACCTCATCAAAGGGCTGTGCCATCCCAGAG  
TCAAAGGTAGGAAATGAATATGTCACCAAAGGCCAAAGTGTGGACCAAGTC  
TACTACCCCAACAAGGAGGCCTTCAAGTGTGAGGAGTGTGGGAAGCCTA  
CAACACCAAGCTGGGATATAAGCGCCATGTGGCCATGCACTCTGCCACGG  
CAGGGGATCTCACCTGTAAAGTGTGCATGCAGACCTACGAGAGCACGCCC  
GTGCTCTTGGAGCACCTCAAGAGCCACTCCGGGAAGTCTTCAGGTGGCAC  
CAAGGAGAAAAACACCCATGCGACCACTGTGACCGTCGTTTCTACACAC  
GGAAGGATGTGAGAAGACACATGGTGGTCCACACGGGTGAAAGGACTTC  
CTGTGCCAGTACTGTGCCAGCGCTTTGGCAGGAAAGACCATCTGACACG  
TCATGTGAAGAAGAGCCACTCGCAGGAGCTGCTGAAGATCAAGACGGAGC  
CTCCTGATATGTTAGGCCTTTTAGCTTCTGGTTCACCACCTTGCTCTGTG  
AAGGAGGAGCTCAGCCCTATGATGTGCGGCATGGGTCCCAACAAAGACCC  
CATGATGGGCAAAAACGTTCCCCAGTGGTGCCCTTTTCCGATGGGTATGT  
ACAACCCTCACCAT-----CTCCAGGCCATGTCTAATTCTGGGGTGGGT  
CACCT-----CACCCATCCCTGATGCCAGTTCCTTGTCTGCAGCTAT  
GGGCATGGGCTGTACATGGAATATCTCATCTATGCGTCTTTCTCATTCA  
TGGGATGTTTACAAATTAGTGATGGATCAAATATTGTGAACCTGCTGGCT  
AGTAACTCTCCAAGTGTTCATATGCTGTGACCCAGCAAAAATACTTCA  
TAACTACAGTCCCGTGATTGGATTTTACATTTATGAGCCCATCGAATACT  
GGAATCCACAGTACAGGAGCACCTGAAGACTCTAAGTCATGGCTTTAAC  
AAGATCTCCTGGATGGACAACCTTTTCCACTACCTTCGGGTAGTGAATGT  
AAGTGCGTCAACCAAGAGCGACTTCATCACAATCCTCAAGGGCTCCTTCC  
TGCGTAGCCCGGAGTACCAGCACTTCACTGAGGACATCATATTCTCTAAG  
A---ACCGTGAGACTG-----ATGAGTATGACATTATTGCCTCACGGAT  
GTACTTGGTGGCAAGGACGACAGAGAAGAAGCGAGAAGAGGTGGTGGAGC  
TTCTGGAAAAGCTTCGTCTTTGATGCTGATCAACAGCATCAAGTTCATT  
GCCTTCAATCCTACATTTGTGTTTATGGATCGCTACAGCTCCTCCGTCAT  
CTCGCCATCCTGACCTCAGGATTCAGCGTACTACAATCCTCATCCTCA  
CTTTCTTCCCTGGTCATCAACCCCTTGGGAAATTTCTGGCTCATCCTCACT  
GTAACATCTGTGGAGCTGGGTGTCTTGGGTTTGTGAGGCTTTTACCAGTT  
TGAATGGCAGCCAGCACTAAAAATGTGTCTACATCTTGCAATGTTGGCA  
TTATTAATGGACTTTCTGGACTGGCTTCCTTAGTGGATGACTCCCCAGCT  
GACACCATACCCGGCGGTTTCCGCTACGATGTGGCACTGGTGTGAGCATT  
AAAGGATATGGAGGAGGACATCATGGAGGGGCTGAGAGAGAATGGGATGG

AAGACAGTGCTTGTACCTCAGGTTTCAGTGTACGATCAAAGAATCTTGT  
GATGGCATGGGCGATGTCAGCGAGAAGCACGGTGGAGGACCAGTTGTTCC  
TGAGAAGGCTGTGCGTTTCTCTTTTACTGTTATGTCCTGTCTCTGTCCTGG  
CAGATGGCGAGGAG-----GAAGAG  
GTTGCCGTCTTCACAGAGCCAAAGCCAAACTCAGAAGTGTCTGTAAAGCC  
CCTCTGCCTGATGTTTGTGGATGAGTCAGACCGGAGACACTCACGGCCA  
TCCTATCACCTATAATTGCAGAGCGTAATGCAATGAAAGAGAGCAGGCTC  
ATCCTATCCATTGGTGGGCTATCTCGCTCATTCCGCTTTCATTTTAGAGG  
CACGGGATACGATGAGAAGATGGTACGTGAGATGGAGGGACTCGAGGCCT  
CAGGGTCCACCTTTATCTGCACTCTTGTGACTCCAGCCGGGCAGAAGCA  
TCTCAAACATGGTGCTACACTCCATCACCCGAGTCATGAAGAGAACCT  
TGAACGTTATGAAATATGGAGAACGAACCCCTTTTCTGAGTCTGTAGATG  
AACTGCGAGACAGAGTCAAAGGGGTCTCTGCCAAGCCCTTCATGGAGACC  
CATCCACACTGGATGCATTACACTGTGACATAGGCAATGCCACTGAGTT  
CTACAAAATCTTTCAGGATGAGATTGGGGAGGTGTACCAAAGGC---CA  
AC---CCCAGCCGGGAGGAACGGCGCAGCTGGAGGGCAGCCCTAGATAAA  
CAGCTGAGGAAGAAACTGAAGCTTAAACCGGTGATGAGGATGAATGGGAA  
CTATGCCCGCCGGCTAATGACCATGGAGGCTGTAGACGTAGTGTGTGAGC  
TGGTGCCCTCAGAGGGAAGGAGAGAGGCCCTGAGGGAGCTTATGAGGCTT  
TACATCCAGATGAAGCCTGTGTGGCGGCCACCTGCCAGCAAAGGAGTG  
CCCCGACCAGCTGTGCCGCTACAGCTTTAACTCCCAGCACTTTGCCGACC  
TCCTGTCTCTACCTTTAAATATAGGTACAATGGAAAGTTACCCAATTAC  
CTGCATAAGACCATAGCCCATGTTCCCTGAAATCATAGAGAGAGATGGATC  
CATAGGAGCCTGGGCCAGCGAAGGGAACGAGTCGGCAAACAAATCATACA  
CCATCGAGATGGGTCCCTTGGGGCCCAGGTGGAAGGAGAGCCACAGCCC  
TTCTCCTGCTCCATTGAAGACCCCCACAAAACAGACAAAGTTCAAGGGCAT  
CAAGACGTACATTTTCATACCGGGTCACGCCGAGCCACACGGGGCATCCTG  
TCTATAGGCGCTACAAACACTTTGACTGGCTGTACAACCGCTTACTGCAC  
AAGTTCACTGTGATCTCTGTGCCTCACCTGCCTGAGAAGCAGGCCACAGG  
GCGATTTGAGGAAGACTTTATCGAGAAGCGCAAGAGGGCGACTGATACTGT  
GGATGAACCACATGACCAGTCAACCAGTCCTCTCCCAATATGAAGCCTTT  
GAGCACTTTCTGATGTGTGCCGATGACAAGCAGTGGAAGTGGGCAAGAG  
ACGTGCGGAGAAGGACGAGATGGTGGGGGCCACTTCATGCTGACCCTCC  
AGATCCCAAACGAGCACCAGGACCTTCAGGATGTAGAAGAGCGGATCGAC  
TCCTTCAAGGCCTTTGCTAAGAAAATGGATGACAGTGTGATGCAGCTCAC  
ACATGTTGCGTCGGAACGGTGCCTAAGCACCTGGGTGGATTTCAGGAAGG  
AGTTTCAGCGGCTGGGAAATGCCTTCCAGTCTATCAGCCAGGCATTCATG  
CTGGACCCTCCTCACAGCTCAGAGACCTTCAACAACGCCATCTCCCATNNNNNNNNNGT  
TCCTCAAACCTGACCTCTCTGGGTTTCATCATTGGAGTTCGGTGTGGTTGGA  
AACCTCCTGATCTCCATCCTGCTGGTCAAAGACAAGAGCCTGCACCGAGC  
GCCCTACTATTTCTGCTGGACCTGTGCGCCTCCGATATCTTGCCTCCG  
CCATCTGCTTCCCCTTTGTCTTCACTTCGGTCAAGAATGGATCTGCCTGG  
ACGTACGGCACGCTGACCTGCAAAGTGATCGCCTTCCCTGGGTGTGCTCTC  
CTGTTCCACACGGCGTTTATGCTGTTCTGTGTGTCAGTGTACGCGCTACC  
TGGCCATTGCACATCACCGTTTCTACACCAAGAGGTTGACCTTCTGGACC  
TGTCTAGCTGTCTGATGCTGGTGGACGTTGTCAGTGGCAATGGCGTT  
CCCGCCGGTGTAGATGTAGGGACGTACTCTTTTATCCGCGAGGAGGACC  
AGTGCAGGTTCCAGCACCGTTCCCTCAGGGCGAATGATTTCGCTGGGCTTT  
ATGCTCCTGCTGGCGCTCATCCTCCTGGCCACACAGCTGGTTTACCTCAA  
GCTCATCTTCTTCGTCCATGACCGTCGAAAGATGAAACCTGTCCAGTTTCG  
TGCTGCTGTGAGCCAGAACTGGACCTTCCACGGGCCAGGCGCCAGCGGG  
CAGGCGGCGGCAACTGGCTGGCTGGTTTCGGTTCGAGGCCCAACCCCGCC  
GACTTTGCTGGGCATCCGACAGAACAGCAACGCAGCGGGCCGAGGCGTC



-----TTTCTAGAGCGGAACCTTCACCCATCCAATTGCTAGG  
CATGCTATTGTTGCTGATGCCCACCAGTGTACCAAGCTGTCAGAGCTGT  
CATGGAGTATGTGCCCTCAGCAACTTCCCTGCTATTTGCAAGACAGAGGAT  
TTTCTCCAACCTGCCCAAGGACATGGTTGTGCAGCTTCTGGCCCATGAGGA  
ACTGGAGACAGAAGATGAAAGACTGGTTTACGAGGCTTCACTCAATTGGG  
TGAACATATGATCTTGAAAGAAGGCAC TGCCACTTGCCAGAGCTGCTGAAA  
ACTGTCCGTTTGGCACTGCTTCCCTGCCATCTTCTAATGGAGAATGTCTC  
CACAGAAGAGCTGATAAATACCCAGGACAAGAGCAAGGAGCTAGTGGATG  
AGGCCATTTCGCTGCAAACCTCAAGATCTTGCAGAACGATGGTGTGGTTAAC  
AGCCCATGCGCCCGTCCACGAAAACTAGCCATGCAC TATTTCTGCTAGG  
TGGGCAGACCTTTATGTGTGACAAGCTATACCTGGTGGACCAGAAGGCCA  
AAGAGATCATCCCCAAGGCAGACATCCCAAGTCCCAGGAAGGAGTTCAGT  
GCCTGCGCCATTGGCTGTAAAGTTTACATAACAGGTGGGA--GAGGCTC-  
TGAAAAATGGCGTTTCCAAAGATGTATGGGTGTACGATACAGTACACGAGG  
AATGGTCCAAGGCAGCCCCCATGCTCATAGCCAGGTTTGGCCATGGCTCT  
GCAGAGCTGAAACACTGCCTGTACGTGGTTGGAGGTCACACAGCAGCAAC  
GGGATGCCCTTCCAGCCTCCCCTTCCAGATGAATATATTGTAGTGTTCAGT  
CGCTCCATGACCAGACTGATCCTGAATGAAGCTGAGCTAATCATGGTGTCT  
GGCTCAGGAGTTTTCAGATGAGAGTTGTACGGTATCCCTGGAGGACCAAT  
CTTTCCCCAGCATAGCTCAGGTGATCAGTGGAGCCTCCATCTTGGTCAGC  
ATGCATGGGGCTCAGCTTGTTCCTCGCTTTTCCCTGCCAGAGGAGCTGC  
CGTGGTGGAACTATTCCCCTATGCTGTAAACCCAGAACAGTACACTCCAT  
ATAAAAACCTGGCATCCCTGCCAGGTATGGACCTCTACTATGTGTCTGTGG  
AGGAATACTTTGGAGGAGAACACAGTCACTCACCCAGACAGACCCCTGGGA  
CCAAGTGGCATCGTCCACTTGGAGAAGGAAGAGCGAGAGCGAATACTGG  
CTAGCAAGGACGTCCCCAGGCACCTGTGCTGCCGGAACCCTGAGTGGCTC  
TTCAGGATCTACCAGGACACTTTGGTGGACATCCCTTCACTCCTCAAAGT  
CCTCAG---AGAGGGTCTGAAA---ACCAGGCCAGCTTGAGGAA---GG  
CCAAGCCAGCCAGCACAGTTCATCCGGGCCGGGTCAGAGAGGCCCAATGC  
CAAACCTCAGTCCAAGCTGCCAATGAGGCCAAGCTCACAGTCTCCTGGCA  
AATCCCCTGGAATCTGAAATATCTCAAGGTGAGAGAAGTGAAGTATGAGG  
TGTGGATCCAGAAGAAGGATGCAAGCAAAGGAACCCTGGAGGATCAAATC  
ATCCAAGCCAACCCTGCGCTAGAGGCCTTTGGTAATGCCAAAACAGTGAG  
GAATGACAACCTTCCCCTTTTGGAAAATTCATCCGAATTCACTTTGGAA  
CAAGTGGTAAGCTCAGTCTGTGTGACATAGAGACTTACCTGTGTGAAAAG  
TCCAGAGTCACTTCCAGCTAAAGGCTGAGAGGAACTACCACATCTTCTT  
CCAGATCTTGTCCAATCAAAGCCAGAGCTGCTGGACATGATGTTGATCA  
CCAACAACCCGTACGACTATTGCTACATCTCCCAAGGAGAGGTAACAGTA  
GCATCCATCAACGACTCTGAGGAGCTGATGGCCACTGACAGTGCCCTTCGA  
TGTGCTTGGCTTCACTCATGAGGAGAAGATGGGAGTGTACAAGCTGATCG  
GGGCCATAATGCACTATGGCAACATGAGGTTCAAGCAGAAGCAACGTGAG  
GAGCAGGCCGAGCCCAGTGGAACTGAGGCTGCTGATAAGTCAGCTTATCT  
AATGGGGCTGAACTCTGCAGACCTCATCAAAGGACTTTGCCACCCCAGGG  
TCAAAGTGGGAAATGAATATGTACCAAAGGTCAAAGGGTAGACCAAGTC  
TACTACCCCAACAAAAGAGGCCTTCAAGTGCAGGAGTGCAGGCAAGCATT  
CAACACCAAGCTGGGCTACAAGCGCCATGTGGCCATGCACTCCGCCACGT  
CGGGGGACCTCACCTGCAAGGTGTGCATGCAGAGCTACGAGAGCACGCCG  
GTGCTACTGGAACACCTCAAGAGCCACTCGGGGAAGTCCCTCGGGCGGCGC  
CAAGGAGAAGAAGCACCCGTGCGACCCTGCGACC CGCCGCTTCTACACCC  
GCAAAGATGTGAGACGGCACATGGTGGTCCACACGGGCGCAAGGACTTC  
CTGTGCCAGTACTGTGCCAGCGCTTCGGCAGGAAGGACCACCTGACGCG  
CCACGTCAAAAAGAGCCACTCGCAGGAGCTGATGAAGATCAAGACGGAGC

CTCCCGATATGCTGGGGCTCCTGGGCTCCGGCTCGCCGCCTTGCTCCGTC  
AAGGAGGAGCTGAGCCCCATGATGTGCGGCATGGGTCCCAACAAAGACCC  
CATGATGGGCAAGCCCTTCCCCAGCGGCACTCCCTTCCCAATGGGCATGT  
ACAACCCTCACCAC-----CTCCAGGCCATGTCCAATTCTGGGGTGGGC  
CACCCG-----CACCCCTCCCTGATGTCCAGCTCGCTGTCTGCAGCCAT  
GGGCATGGGCTGTACANNNNTACCTCATCTATGCTTCCTTCTCTTTTCATGGGA  
TGTTTACAAATTAGCGACGGTTCAAACATTGTGAATTTGCTGGCCAGCAA  
CTCCCCGAGTGTTTCTACGCTCTGACCCAGCAGAAGTACTTCAGCAACT  
ATAGTCCCGTGATCGGGTCTACATTTATGAGCCCATCGAGTACTGGAAT  
GCGACGGTGCAGGAGCACCTGAAGACGCTGAGCCACGGCTTCAACAAGAT  
CTCTGGATGGACAACCTTTTTTCCACTACCTGCGGGTGGTGAACGTGAGTG  
CCTCCACCAAGAATGACTTCATCAACATCCTCAAGGGCTCCTTCTGCGC  
AGCCCGGAGTACCAGCACTTCACAGAGGACATCATATTCTCCAAGA---T  
CCGGGAGAGCG-----ACGAATACGACATCATTGCCTCACGCATGTACC  
TCGTGGCACGGACCACAGAGAAGAAGCGGGAGGAGGTGGTGGAGCTTCTG  
GAGAAGCTGCGACCGCTGATGCTGATCAACAGCATCAAGTTCATCGCTTT  
CAACCCGACTTTTCGTATATATGGACCGTTACAGTTCCTTCTGTGATCTCAC  
CCATCCTTACCTCAGGCTTCAGCGTCTCACCATCCTCATCCTCACTTTC  
TTCTGGTTCATCAACCCCTTGGGTAACCTTGGCTAATCCTGACTGTCAC  
CTCAGTGGAGTTGGGCGTGCTAGGTTTGATGGGCCATCACACATTTGAGT  
GGCAGCCCGCCCTCAAAAATGTGTCCCGTTCTGCCACTTGGGTATCATC  
AACGGGCTTTTCTGGGTGGGCGACCTCTGTGGACGATGCCCTGCTGAAAC  
CATTGCCCGCGTTTTCGCTATGACGTTGCCCTAGTGTCCGCCTTGAAGG  
ATCTGGAAGAGGACATCATGGAGGGGCTGAGGGAAAGGGGGCTCGAAGAC  
AGCACTTGTACCTCGGGCTTCACTGTTATGATAAAAAGAATCATGTGACGG  
CATGGGAGATGTCAGTGAGAAGCACGGTGGAGGCCCGGTGGTGGCAGAGA  
AGGCTGTGCGCTTCTCATTTACTGTGTCATGTGAGTGTCTGTGCTGGCAGAT  
GGAGAGGAR-----AAGGTGGTATC  
TGCTTTCAGTGAGCCAAAACCCAACTCTGAGCTGTCTGTAAGCCCCTGT  
GCATCATGTTTGTGCGACGAGTCCGACCGCGAGACTCTCACCGCCGTCCTG  
GGCCCTTTGGTGGCGGAGCGGGAGGCGATGAAGCGGAGCCAACTCATCCT  
CTCCATCGGTGGCCTCCCTCGCTTGTCTGCTTCCAATTCAAAGGCACTG  
GCTATGATGAGAAGATGGTGCCTGAGTTTGAGGGCCTGGAGGCCCTCCGGG  
TCAACCTATATCTGCACCCTCTGCGATTCTACTCGAGCAGAGGCCTCTCA  
GAACATGGTGGTTCACTCCGTCACCCGCAGCCACGATGAGAATCTAGAGC  
GCTATGAGATGTGGAGGACCAATCCCTTCTCAGAGTCTGCCGACGAGCTG  
CGAGACAGAGTGAAAGGGATCTCCGGCAAGCCTTCTGGAACCCATCC  
CACTCTGGATGCGTTACACTGTGAAATTGGCAATGCCACGGAGTCTACA  
AAATCTTCCAAGACGAGATCGGGGAGGTGTTTCAGAAAGG---CAAC---  
CCACCACGGGAAGAGCGGCGCCGCTGGCGGGCGGCCCTCGATAAGCAGCT  
GAGGAAGAAGCTGAAGCTTAAACC GGTAATGAGGATGAACGGGAAC TACG  
CTCGGAAGTTGATGACCCAGGAGACCGTGGACGTGGTGTGTGAGTTGGTG  
CCTTCGGAGGAGCGACGGGAGGCCCTCAGGGCCCTCATGCGGCTCTACCT  
CGAGATGAAGCCGGTGTGGCGCAGCACCTGCCCCGCCAAGGAATGTGCCG  
ATCAGCTGTGTGCTTTCAGCTTCAACTCCCAGAGCTTCGCCGAGCTCCTC  
TCCACCAGCTTCAAGTATAGATAACAACGGAAAGATCACAAATTACCTGCA  
CAAGACCCTCGCTCACGTCCCGGAAATCATAGAAAAGAGATGGCTCCATTG  
GAGCCTGGGCGAGCGAGGGGAATGAGTCCGCGAACAAATCATAACCAATT  
GAGATCGGCCCCAAAGGGCCGAATGGAAGGAGAGTCCGCAGCCCTTCTC  
TTGCTCCATCGAAGACCCCAAAAGCAAACCTAAGTTCAAGGGCATCAAGA  
CGTACATTTTCATACAGGGTGACCCCGAGCCACACGGGGCAACCCGTCTAC  
AGACGCTACAAACACTTTGACTGGCTGTACAACCGCTTGCTGCACAAGTT  
CACTGTGATCTCGGTGCCCCACCTGCCCGAGAAGCAGGCCACAGGCCGCT





>Zeus faber

AGCCTTCTTATTTCGAGCTGAACTTAGTCAACCAGGGGCCCTCCTTGGAGA  
CGATCAAATTTATAATGTCATCGTTACAGCTCACGCTTTTGTATAATCT  
TTTTTATAGTTATAACCAATCATAATTGGAGGCTTTGGAACTGACTAATT  
CCACTTATAATCGGGGCCCTGACATAGCCTTCCCCCGCATAAAATAATAT  
AAGCTTTTACTCCTCCCCCCTCCTTTTTACTTCTGCTTGCCTCTTCGG  
GAGTTGAAGCCGGAGCTGGGACAGGATGAACAGTCTACCCCTTTAGCA  
GGCAATCTAGCCCATGCCGGGGCTCCGTAGATCTAACTATTTTTTCCCT  
CCACTTAGCAGGGATTTTCATCTATCTTGGGCGCAATTAATTTTATTACCA  
CCATTATTAACATAAAAACCCCTGCCATTTTACAGTACCAGACCCCTTA  
TTTGTGTGGTCACTCCTGATTACAGCAGTCTACTGCTTTTATCACTACC  
AGTACTAGCGGCTGGAATTACAATACTTCTTACTGACCGAACTTAAACA  
CCTCTTTCTTTGATCCTGCAGGCGGAGGAGACCTATTTTATAACCAACAC  
CTA-----

-----TTTCTAGAGCGGAACCTTCACCCATCCAATTGTCTAGG  
CATGCTATTGTTGTCTGATGCCACCAGTGTACCAAGCTGTCAGAGCTGT  
CATGGAGTATGTGCCCTCAGCAACTTCCCTGCTATTTGCAAGACAGAGGAT  
TTTCTCCAACTGCCCAAAGACATGGTTGTGCAGCTTTTGGCCCATGAGGA  
ACTGGAGACCGAAGATGAAAGACTGGTTTACGAGGCTTCACTCAATTGGG  
TGAATATGATCTTGAAAGAAGGCACCTGCCACTTCCAGAGCTACTAAAA  
ACTGTCCGTTTGGCACTGCTTCCCTGCCATCTTCCCTAATGGAGAATGTCTC  
TACAGAAGAGCTGATAAATTTCCAGGACAAGAGCAAGGAGCTAGTGGATG  
AGGCCATTTCGCTGCAAACTCAAGATCTTGCAGAATGATGGTGTGGTTAAC  
AGCCCATGTGCACGTCCAAGAAAACTAGCCATGCACTATTTCTGCTAGG  
TGGGCAGACCTTTATGTGTGACAAGCTATACCTGGTGGACCAGAAAGCCA  
AAGAGATCATTCCAAGGCAGACATCCCCAGTCCCAGGAAGGAGTTCAGT  
GCTTGTGCCATTGGCTGTAAAGTTTACATAACAGGTGGAA--GAGGCTC-  
CGAAAAATGGCGTTTCCAAGATGTATGGGTGTATGATAACAATACACGAGG  
AATGGTCCAAGGCAGCCCCATGCTCATAGCCAGGTTTGGCCATGGCTCT  
GCAGAGCTGAAACACTGCCTGTACGTTGTTGGAGGTCACACAGCAGCAAC  
GGGCTGTCTTCCAGCTTCCCCTTCTAGATGAATACATTGTAGTGTTCAGT  
CGCTCCATGACCAGACTGATCCTGAACGAAGCCGAGCTAATCTTGGTGCT  
GGCTCAGGAGTTTCAGATGAGAGTTGTTACGGTATCCCTGGAGGACCAGT  
CTTTCCCAGCATAGTTTCCAGGTGATCAGTGGAGCCTCCATCTTGGTCAGC  
ATGCACGGGGCTCAGCTTGTGCTCGCTTTTCCCTGCCAGAGGAGCTGC  
CGTGGTGGAACTGTTCCCCTATGCTGTAAACCCAGAACAGTACACTCCAT  
ATAAAAACCTGGCTTCCCCTGCCAGGTATGGACCTCCACTACTTGTCCCTGG  
AGGAACACTTTGGAGGAGAACACAGTCACTCACCCAGACAGACCCCTGGGA  
ACAAGGTGGCATCGCCCACTTGGAGAAGGAAGAGCGAGAGAGAATACTGG  
CCAGCAAGGACGTCCCAGGCACCTATGCTGCCGGAACCCTGAGTGGCTC  
TTCAGGATCTACCAGGACACTTTGGTGGACATCCCTTCACTCCTCAAAGT  
CCTCAG---AGAGGGTCTGAAA---ACCAGGCCAGCTTGAGGAA---GG

CCAAGCCAGCCAGCACAGTTCATCCGGGCCGGGTCAGAGAGGCCAGTGC  
CAAACCTCAGTCCAAGCTGCCAATGAGGCCAAGCTCACAGTCTCCTGGCA  
AATCCCCTGGAATCTGAAATATCTCAAGGTGAGAGAAGTGAAGTATGAGG  
TGTGGATCCAGAAAAAGGACGCAAGCAAAGGAACCTGGAGGATCAAATC  
ATCCAAGCCAACCCTGCGCTAGAGGCCTTTGGTAATGCCAAAACCTGAG  
GAATGACAACCTCTCCCGTTTTGGAAAATTCATTCGAATTCACTTTGGAA  
CGAGTGGTAAGCTGAGCTCTGCTGACATAGAGACTTACCTGCTGGAAAAG  
TCCAGAGTCACCTCCAGTTGAAGGCTGAGAGGAACTACCCATCTTCTT  
CCAGATCTTGTCCAAATCAGAAGCCAGAGCTGCTGGACATGATGTTGATCA  
CCAATAACCCGTACGACTATTGCTACATCTCCCAAGGAGAGGTAACAGTA  
GCATCCATCAACGACTCTGAGGAGCTGATGGCCACTGACAGTGCC TTCGA  
TGTGCTTGGCTTCACTCATGAGGAGAAGATGGGAGTGTACAAGCTGATCG  
GGGCAATAATGCACTATGGCAACATGAGGTTCAAGCAGAAGCAACGTGAG  
GAGCAGGCGGAGCCCAGTGGAACTGAGGCTGCTGATAAGTCAGCTTATCT  
AATGGGGCTGAACTCTGCAGACCTCATCAAAGGACTTTGCCACCCCAGGG  
TCAAAGTGGGAAATGAATATGTCACCAAAGGTCAAAGGGTAGACCAAGTC  
TACTACCCCAACAAAAGAGGCCTTCAAAGTGCAGAGAGTGCAGGAAAGCACTA  
CAACACCAAGCTGGGCTACAAGCGCCATGTGGCCATGCACTCCGCCACGT  
CGGGGGACCTCACCTGCAAGGTGTGCATGCAGAGCTACGAGAGCACGCC  
GTGCTGCTGGAACACCTCAAGAGCCACTCGGGGAAGTCCCTCAGGCGGCGC  
CAAGGAGAAGAAGCACCCATGCGACCACTGCGACCGCCGCTTCTACCCC  
GCAAAGATGTGAGACGGCACATGGTGGTCCACACGGGCCGCAAGGACTTC  
CTGTGCCAGTACTGTGCCAGCGCTTCGGCAGGAAGGACCACCTGACCCG  
CCACGTCAAAAAGAGCCACTCGCAGGAGCTGATGAAGATCAAGACAGAGC  
CTCCCGATATGCTGGGACTCCTGGGCTCCGGCTCGCCGCTTGCTCCGTC  
AAGGAGGAGCTGAGCCCATGATGTGCGGCATGGGTCCCAACAAAGACCC  
CATGATGGGCAAGCCCTTCCCAGCGGCACTCCCTTCCCATGGGCATGT  
ACAACCTCACCCAC-----CTCCAGGCCATGTCCAATTCTGGGGTGGGC  
CACCCG-----CACCCCTCCCTGATGTCCAGCTCGCTGTCTGCAGCCAT  
GGGCATGGGCTGTACATGGAGTACCTCATCTACGCTTCCTTCTCCTTCA  
TGGGATGTTTTACAAATTAGCGACGGTTCAAACATTGTAAATTTGCTGGCC  
AGCAACTCTCCGAGTGTTCCTACGCTCTGACCCAGCAGAAGTACTTCAG  
CAACTACAGTCCCGTGATCGGGTCTACATTTATGAGCCCATCGAGTACT  
GGAATGCCACGGTGCAGGAGCACCTGAAGACGCTGAGCCACGGCTTCAAC  
AAGATATCCTGGATGGACAACTTTTTCCACTACCTGCGGGTGGTGAACGT  
GAGTGCCCTCCACCAAGAACGACTTCATCAACATCCTCAAGGGCTCCTTCT  
TGCGCAGCCCGGAGTACCAGCACTTACAGAGGACATCATCTTCTCCAAG  
A---ACCGGGAGAACG-----ACGAGTACGACATCATCGCCTCACGCAT  
GTACCTTGTGGCACGGACCACGGAGAAGAAGCGGGAGGAGGTGGTGGAGC  
TTCTGGAGAAGCTGCGACCGCTGATGCTGATCAACAGCATCAAGTTCATC  
GCTTTCACCCGACTTTCGTGTATATGGACCGTTACAGTTCCTCTGTGAT  
TTCACCTATCCTTACCTCAGGCTTCAGTGTCTCACCATCCTCATCCTCA  
CTTTCTCCTGGTCAACCCCTTGGGTAACCTTCTGGCTCATCCTGACC  
GTCACCTCAGTGGAGTTGGGTGTGCTAGGTTTGATGNNNNNNNNNNNNNNNNNNNNN  
NNNNNNNNNNNNNNNNNNNNNNNNNNNNNNNNNNNNNNNNNNNNNNNNNNNN  
NNNNNNNNNNNNNNNNNNNNNNNNNNNNNNNAATGGGCTTTC TG  
GAGGGCGACCTCTGTTGATGATGCCCCTGCTGAAACCATCACTCACCGTT  
TTCGCTATGATGTTGCCCTGGTGTCCGCCTTAAAGGATCTGGAAGAGGAC  
ATCGTGGAGGGGCTGAGGAAAAGGGCTCTCGAAGACAACACTTGTACCTC  
GGGCTTCACTGTTATGATAAAAGAATCATGTGATGGCATGGGAGATGTCA  
GTGAGAAGCACGGTGGAGGGCCAGCGGTGCCAGAGAAAGCTGTGCGCTTC  
TCGTTTACTATCATGTCTGTGTCTGTGCTGGCAGATGGAGAGGAG-----  
-----AAGGCAGTAACCGTCTTCAGAGAGC  
CAAACCAAACTCCGAGCTGTCTGTAAAGCCCTGTGTATCATGTTTGTGTC

GATGAGTCAGACCGGAGACTCTCACCACCGTGCTGGGCCCTTTGGTGGC  
GGAGCGGGATGCGATGAAGCAGAGCCAACCTCATCCTCTCGATTGGTGGTC  
TTTCTCGCTCGTTCTGCTTCCAATCAAAGGCACTGGCTATGATGAGAAG  
ATGGTGCCTGAGCTTGAGGGCCTGGAGGCCTCCGGGTCAGCTTATATCTG  
CACTCTCTGCGATACTACTCGAGCAGAGGCCTCTCAAACATGGTGCTTC  
ACTCAGTCACCCGCAGCCATGATGAGAATCTAGAGCGCTATGAGTTGTGG  
AGGACCAATCCATTCTCAGAGTCTGCCGAAAGAGCTGCGAGACAGAGTGAA  
AGGGATCTCTGCCAAGCCATTCTGAAACCCATCCCCTCTGGATGCGT  
TACACTGTGAAATTTGGCAATGCCACAGAGTTCTACAAAATTTTCCAAGAT  
GAGATCGGGGAGGTGTATCGGAAAGA---CAAC---CCACCTCGGGAAGA  
ACGGCGTCGCTGGCGGGCGGCCCTTGATAAGCAGCTGAGGCAGAAGTTAA  
AGCTTAAACCATAATGAGGATGAATGGGAACTATGCTCGGAAGTTGATG  
ACCCAGGAGACTGTGGATGTGGTGTGTGAGTTGGTGCCTTCAGAGGAGCG  
ACGGGAGGCCCTGAGGAGGCTCATGCGGCTCTACCTGGAGATGAAGCCCG  
TGTGGCGCAGCACCTGTCCAGCCAAAAGAATGTCGCGATCAGCTGTGCCGC  
TTCAGCTTCAACTCCCAAAGCTTTGCTGAGCTCCTCTCCACAAGCTTCAA  
ATATAGATAACAACGGAAAGATCACCAATTAATTGCACAAGACCCCTGGCTC  
ACGTCCCGGAAATCATAGAAAGAGATGGCTCTATTGGAGCCTGGGCGAGT  
GAGGGTAACGAGTCAGCAAACAAATCGTACACCATGAGATCGGCCCCAA  
AGGGCCGAATGGAAGGAGAGTCCGCAGCCCTTCTTTGCTCCATCGAAG  
ACCCACAAAACAAACCAAGTTCAAGGGCATCAAGACGTACATTTTCATAC  
AGGGTGACCCCGAGCCACACGGGACAACCCGCTTACAGACGCTACAAACA  
CTTTGACTGGTTGTACAACCGCTTGCTGCACAAGTTCACTGTGATCTCGG  
TGCCCCACCTGCCCGAGAAGCAGGCCACAGGCCGCTTCGAGGAGGACTTC  
ATTGAGAAACGTAAGAGACGCCTAGTCCTGTGGATGAACCACATGACCAG  
CCACCCGGTCTCTCCAGTATGAGGGATTTGAACTTCCTCATGTGTG  
GCGATGACAAGCAGTGAAGCTGGGGAAGAGGCGGGGAGAGAAGGACGAG  
ATGGTGGCGCCCACTTCATGCTGACCTTCCAGATTCCAGTAGTGACCA  
GGACCTCCAGGACGTCGAGGAGCGGGTGGACTCCTTCAAGTCCTTCGCCA  
AGAAGATGGACGACAGCGTCATTCAGCTCAGCAGCTCGCTTCGGAGATG  
GTCCGGAAGCACCTCGGAGAATTCAGGAAGGAGTTCCAGCGAATGGGGAA  
CGCCTTTCATCTTTGAGCCAGGCGTTTCATGCTGGACCCGCCCCACAGCT  
CAGAGGCCCTCAACAACGCCATCTCGCAC-----

-----  
-----  
-----  
-----  
-----  
-----  
-----  
-----  
-----  
-----  
-----  
-----  
-----  
-----  
-----  
-----  
-----  
-----  
-----  
-----

-----GCCAAATCTCGCTTTACCCTGGCGTGGGGACTG
